# Supplementary material for: Dnmt3a knockout in excitatory neurons impairs postnatal synapse maturation and increases the repressive histone modification H3K27me3
Source: eLife. 2022 May 23;11:e66909. doi: 10.7554/eLife.66909 (PMC9170249; doi:10.7554/eLife.66909)
Supplement: Supplementary file 1. [file elife-66909-supp1.xlsx]

## Sheet: Readme
Supplementary File 1. Sequencing metrics for RNA-seq, MethylC-seq, ChIP-seq and genomic DNA for the Dnmt3a cKO and control samples.
Explainations for the metrics:
RNA-seq:
num_pooled_animals: number of animals contributing tissue to each sample.
raw_reads: number of reads from the raw fastq files.
clean_reads: number of reads after QC (trimming adapters and removing low-quality reads).
unique_mapped_reads: number of reads mapped to unique loci in the genome.
multiple_loci_mapped_reads: number of reads mapped to multiple loci (but less or equal than 20) in the genome.
too_many_loci_mapped_reads: number of reads mapped to more than 20 loci in the genome.
unmapped_too_many_mismatches%: percent of reads that were unmapped due to too many mismatches (>999).
unmapped_too_short%: percent of reads unmapped due to too small of the read length.
unmapped_other%: percent of unmapped reads due to other reasons.
MethylC-seq:
non_clonal_reads: number of reads after removing clonal reads (PCR duplicates).
X_coverage_with_clean_reads: X-fold coverage of the genome computed using clean reads.
X_coverage_with_unique_mapped_reads: X-fold coverage of the genome computed using uniquely mapped reads.
genome_covered%: percent of genome covered by at least one read.
number_of_covered_cytosines: number of cytosines covered by at least one read.
covered_cytosine%: percent of cytosines covered by at least one read.
average_reads_covered_per_cytosine: average number of reads covered per cytosine.
non_conversion_rate: non-conversion rate from the bisulfite conversion (estimated using spiked-in unmethylated lambda phage DNA)
adjusted_global_mCG_level: CG methylation level across the whole genome after adjusting for non-conversion rate.
adjusted_global_mCH_level: non-CG methylation level across the whole genome after adjusting for non-conversion rate.
MethylC-seq:
NRF: Non-Redundant Fraction, number of distinct uniquely mapping reads (i.e. after removing duplicates) / Total number of reads.
PBC1: PCR Bottlenecking Coefficient 1 (see ENCODE definiitons).
PBC2: PCR Bottlenecking Coefficient 2 (see ENCODE definiitons).
total_nodup_reads: number of reads after deduplication.
total_nodup_pairs: number of read pairs after deduplication.
genomic DNA:
genome_coverage%: percent of the genome covered by at least one read.

## Sheet: RNA-seq
sample_id	num_pooled_animals	raw_reads	clean_reads	clean_reads%	unique_mapped_reads	unique_mapped%	multiple_loci_mapped_reads	multiple_loci_mapped%	too_many_loci_mapped_reads	too_many_loci_mapped%	unmapped_too_many_mismatches%	unmapped_too_short%	unmapped_other%
P39_Control_rep1	2	55966237	55302202	0.988135	48992901	0.8859	700118	0.0127	54273	0.001	0	0.096	0.0045
P39_Control_rep2	2	50871804	50183645	0.986473	44027346	0.8773	662626	0.0132	46547	0.0009	0	0.1039	0.0046
P39_Dmnt3a_cKO_rep1	2	51962395	51361365	0.988433	45715492	0.8901	670439	0.0131	53447	0.001	0	0.0912	0.0046
P39_Dmnt3a_cKO_rep2	2	57441907	56729570	0.987599	50264037	0.886	738227	0.013	50687	0.0009	0	0.0956	0.0044

## Sheet: MethylC-seq
sample_id	num_pooled_animals	raw_reads	clean_reads	clean_reads%	unique_mapping_reads	unique_mapping%	non_clonal_reads	non_clonal%	X_coverage_with_clean_reads	X_coverage_with_unique_mapped_reads	genome_covered%	number_of_covered_cytosines	covered_cytosine%	average_reads_covered_per_cytosine	non_conversion_rate	adjusted_global_mCG_level	adjusted_global_mCH_level
P0_Control_rep1	1	732805740	716142660	0.977261	435813878	0.608557	378576634	0.528633	39.4129	23.985	0.8867	989378813	0.896861	10.3	0.0061	0.733	0
P0_Control_rep2	1	598297586	591176952	0.988099	357099744	0.604049	315484493	0.533655	32.5354	19.653	0.885	985337945	0.893198	8.7	0.0054	0.7291	0
P0_Control_rep3	1	751769774	739589302	0.983798	453662774	0.613398	395009835	0.534093	40.7033	24.9673	0.8868	989996092	0.89742	10.9	0.0071	0.7339	0.00015
P0_Control_rep4	1	741530088	731963502	0.987099	438659515	0.599292	381010432	0.520532	40.2836	24.1416	0.8865	989299303	0.896789	10.5	0.0051	0.7347	0
P0_Control_rep5	1	639781736	627284382	0.980466	366828982	0.584789	324441576	0.517216	34.5226	20.1884	0.8853	985295199	0.893159	9	0.0076	0.7299	0
P0_Control_rep6	1	715518846	701329550	0.980169	418628019	0.596906	365326605	0.520906	38.5977	23.0392	0.8861	987970155	0.895584	10	0.0066	0.7334	0.00016
P0_Dnmt3a_cKO_rep1	1	674542776	666059462	0.987424	395308248	0.593503	347641331	0.521937	36.6566	21.7558	0.8855	985858478	0.89367	9.6	0.006	0.727	0
P0_Dnmt3a_cKO_rep2	1	777931786	768478100	0.987848	469533875	0.610992	406426161	0.528871	42.2932	25.8408	0.8871	990153164	0.897563	11.2	0.0064	0.7282	0
P39_Control_rep1	2	2342629134	2341296308	0.999431	1708317471	0.729646	1136574089	0.485446	128.853	94.0173	0.892364	1001736822	0.908063	27.8858	0.00271987	0.73262	0.0204357
P39_Control_rep2	2	2105796724	2104650664	0.999456	1549041629	0.736009	1127176463	0.535565	115.829	85.2515	0.892442	1003240055	0.909426	28.3847	0.0026269	0.719908	0.0192306
P39_Dnmt3a_cKO_rep1	2	1998271048	1996896820	0.999312	1338213408	0.670146	873382058	0.43737	109.899	73.6486	0.891802	999726810	0.906241	21.1945	0.00268674	0.601342	0.000825521
P39_Dnmt3a_cKO_rep2	2	2000137628	1999257668	0.99956	1412935559	0.70673	931459906	0.465903	110.029	77.7609	0.891937	998884494	0.905477	22.4752	0.00222525	0.601276	0.000638694

## Sheet: ChIP-seq
sample_id	num_pooled_animals	number_reads	mapped_reads	mapped_reads%	paired_reads	duplicated_pairs	duplicated_rate	total_read_pairs	distinct_read_pairs	NRF	PBC1	PBC2	total_nodup_reads	total_nodup_pairs
P39_Control_H3K4me3_rep1	2	64284956	7832474	0.12184	2867984	543011	0.189335	2867953	2324949	0.810665	0.80755	5.09004	4649946	2324973
P39_Control_H3K4me3_rep2	2	77789554	19825755	0.254864	7560121	1327208	0.175554	7559818	6232650	0.824444	0.822292	5.52622	12465826	6232913
P39_Dnmt3a_cKO_H3K4me3_rep1	2	82693352	9315261	0.112648	3550013	648281	0.182614	3549948	2901677	0.817386	0.815224	5.33052	5803464	2901732
P39_Dnmt3a_cKO_H3K4me3_rep2	2	111248556	41074618	0.369215	15605998	3106388	0.199051	15605602	12499280	0.800948	0.798241	4.8437	24999220	12499610
P39_Control_H3K27ac_rep1	2	68318386	61772504	0.904186	25173367	7147016	0.283912	25172985	18026094	0.716089	0.710331	3.36796	36052702	18026351
P39_Control_H3K27ac_rep2	2	98942836	87603174	0.885392	35503890	7299424	0.205595	35502831	28203650	0.794406	0.791335	4.68998	56408932	28204466
P39_Dnmt3a_cKO_H3K27ac_rep1	2	92925612	83541604	0.899016	34200841	13780700	0.402935	34200328	20419833	0.597065	0.578705	2.24269	40840282	20420141
P39_Dnmt3a_cKO_H3K27ac_rep2	2	147191284	137144813	0.931745	55308537	10400560	0.188046	55307341	44906991	0.811954	0.809615	5.12594	89815954	44907977
P39_Control_H3K27me3_rep1	2	73481544	63164208	0.859593	23550826	4371536	0.185621	23550319	19178882	0.814379	0.810938	5.14464	38358580	19179290
P39_Control_H3K27me3_rep2	2	70249720	60967035	0.867862	22385525	2814564	0.125731	22385068	19570564	0.874269	0.874887	7.91683	39141922	19570961
P39_Dnmt3a_cKO_H3K27me3_rep1	2	103538130	91496380	0.883697	33672393	2835385	0.084205	33671173	30835897	0.915795	0.917625	12.0836	61674016	30837008
P39_Dnmt3a_cKO_H3K27me3_rep2	2	162676602	145756182	0.895987	54492223	5094475	0.0934899	54490813	49396450	0.90651	0.908021	10.7705	98795496	49397748
P39_Control_IgG	2	64882232	54566521	0.841009	20819866	7292411	0.350262	20819644	13527309	0.649738	0.632091	2.55431	27054910	13527455
E14_Control_H3K27me3_rep1	2	81553268	66260418	0.81248	81553268	5081314	0.0623067	25173264	20128384	0.799594	0.797886	4.89727	40184162	20092081
E14_Control_H3K27me3_rep2	2	92978176	81221918	0.873559	92978176	6214474	0.066838	30694864	24531398	0.799202	0.796707	4.85126	48961402	24480701
E14_Dnmt3a_cKO_H3K27me3_rep1	2	79783088	51020877	0.639495	79783088	8134817	0.101962	20036890	11974815	0.597638	0.593344	2.44376	23805440	11902720
E14_Dnmt3a_cKO_H3K27me3_rep2	2	94454636	88274734	0.934573	94454636	5042647	0.053387	32971118	27971062	0.84835	0.845958	6.37901	55857230	27928615
P0_Control_H3K27me3_rep1	2	157951036	92012552	0.582538	157951036	31941470	0.202224	35758853	3959366	0.110724	0.095796	1.08089	7636710	3818355
P0_Control_H3K27me3_rep2	2	153325130	111290304	0.725845	153325130	37862687	0.246944	43443334	5751904	0.1324	0.09805	1.1151	11168670	5584335
P0_Dnmt3a_cKO_H3K27me3_rep1	2	149279592	102957994	0.689699	149279592	22123725	0.148203	41217900	19189021	0.465551	0.413559	1.48127	38190004	19095002
P0_Dnmt3a_cKO_H3K27me3_rep2	2	158160162	94197752	0.595585	158160162	25880617	0.163635	36776597	11268745	0.306411	0.256818	1.21068	21793180	10896590

## Sheet: genomic DNA
sample_id	num_pooled_animals	number_reads	unique_mapped_reads	unique_mapped%	genome_coverage%
P39_Control_rep1	1	375397089	333390647	0.888101	0.970881
P39_Control_rep2	1	369809982	331262769	0.895765	0.970976
P39_Dnmt3a_cKO_rep1	1	369349209	327598796	0.886962	0.971053
P39_Dnmt3a_cKO_rep2	1	367714571	328987004	0.89468	0.971054
