# Supplementary material for: Dnmt3a knockout in excitatory neurons impairs postnatal synapse maturation and increases the repressive histone modification H3K27me3
Source: eLife. 2022 May 23;11:e66909. doi: 10.7554/eLife.66909 (PMC9170249; doi:10.7554/eLife.66909)
Supplement: Supplementary file 3. [file elife-66909-supp3.xlsx]

## Sheet: Readme
Supplementary File 3. List of differentially methylated regions (DMRs).
DMRs were called using methylpy (https://github.com/yupenghe/methylpy). See the "Methods" section for detailed parameters.
The tables were imported from BED6 files, in which the coordinates are from the mm10 genome and 0-based.
The "name" field contains the following information of each DMR in order, separated by the pipe symbol ("|"): unique DMR id, number of DMS(differentially methylated site) in the DMR, mCG level in sample 1, mCG level in sample 2 (see the table header for sample information).
The "score" field is a placeholder to fulfill the requirement of the BED6 format and hence contains no specific infromation about the DMRs. And the "strand" field is filled with all "." signs to indicate no strand information for DMRs.

## Sheet: P39 Dnmt3a cKO hypo DMRs
chrom	start	end	name (id|num_DMS|mCG_P39_Dnmt3a_cKO|mCG_P39_Control)	score	strand
chr1	3073818	3074049	P39_cKOvsControl_cKO_hypo_dmr_2|3|0.481|0.852	0	.
chr1	3102818	3102911	P39_cKOvsControl_cKO_hypo_dmr_3|3|0.478|0.843	0	.
chr1	3104006	3104023	P39_cKOvsControl_cKO_hypo_dmr_4|4|0.493|0.924	0	.
chr1	3130147	3130281	P39_cKOvsControl_cKO_hypo_dmr_7|4|0.018|0.442	0	.
chr1	3191499	3192142	P39_cKOvsControl_cKO_hypo_dmr_8|6|0.498|0.842	0	.
chr1	3219059	3219777	P39_cKOvsControl_cKO_hypo_dmr_10|6|0.215|0.646	0	.
chr1	3283370	3283573	P39_cKOvsControl_cKO_hypo_dmr_11|3|0.375|0.679	0	.
chr1	3373231	3373261	P39_cKOvsControl_cKO_hypo_dmr_14|3|0.220|0.652	0	.
chr1	3380083	3380114	P39_cKOvsControl_cKO_hypo_dmr_15|3|0.193|0.673	0	.
chr1	3395719	3396372	P39_cKOvsControl_cKO_hypo_dmr_16|4|0.269|0.604	0	.
chr1	3435835	3436555	P39_cKOvsControl_cKO_hypo_dmr_18|5|0.351|0.697	0	.
chr1	3482623	3482781	P39_cKOvsControl_cKO_hypo_dmr_19|4|0.173|0.677	0	.
chr1	3541639	3541704	P39_cKOvsControl_cKO_hypo_dmr_22|3|0.299|0.711	0	.
chr1	3548922	3550416	P39_cKOvsControl_cKO_hypo_dmr_23|27|0.433|0.753	0	.
chr1	3629591	3629669	P39_cKOvsControl_cKO_hypo_dmr_25|6|0.191|0.575	0	.
chr1	3647339	3647566	P39_cKOvsControl_cKO_hypo_dmr_27|4|0.255|0.744	0	.
chr1	3672929	3673334	P39_cKOvsControl_cKO_hypo_dmr_28|4|0.448|0.795	0	.
chr1	3674280	3674699	P39_cKOvsControl_cKO_hypo_dmr_29|3|0.247|0.631	0	.
chr1	3723176	3723541	P39_cKOvsControl_cKO_hypo_dmr_31|4|0.419|0.762	0	.
chr1	3842146	3843176	P39_cKOvsControl_cKO_hypo_dmr_34|12|0.384|0.763	0	.
chr1	3878796	3879057	P39_cKOvsControl_cKO_hypo_dmr_35|7|0.443|0.838	0	.
chr1	3898971	3899613	P39_cKOvsControl_cKO_hypo_dmr_36|6|0.228|0.552	0	.
chr1	3902267	3902578	P39_cKOvsControl_cKO_hypo_dmr_38|7|0.199|0.616	0	.
chr1	3913532	3914373	P39_cKOvsControl_cKO_hypo_dmr_39|5|0.016|0.527	0	.
chr1	3953549	3953702	P39_cKOvsControl_cKO_hypo_dmr_40|3|0.258|0.583	0	.
chr1	3970673	3970681	P39_cKOvsControl_cKO_hypo_dmr_41|3|0.036|0.400	0	.
chr1	3993552	3993591	P39_cKOvsControl_cKO_hypo_dmr_44|5|0.364|0.741	0	.
chr1	4032127	4032241	P39_cKOvsControl_cKO_hypo_dmr_46|3|0.354|0.684	0	.
chr1	4248778	4248909	P39_cKOvsControl_cKO_hypo_dmr_53|6|0.203|0.569	0	.
chr1	4326640	4326851	P39_cKOvsControl_cKO_hypo_dmr_54|6|0.127|0.736	0	.
chr1	4394835	4394944	P39_cKOvsControl_cKO_hypo_dmr_56|5|0.343|0.809	0	.
chr1	4409378	4409936	P39_cKOvsControl_cKO_hypo_dmr_57|7|0.304|0.852	0	.
chr1	4412569	4413174	P39_cKOvsControl_cKO_hypo_dmr_58|9|0.323|0.710	0	.
chr1	4425145	4425517	P39_cKOvsControl_cKO_hypo_dmr_60|4|0.496|0.863	0	.
chr1	4457123	4457210	P39_cKOvsControl_cKO_hypo_dmr_61|3|0.315|0.782	0	.
chr1	4481027	4481251	P39_cKOvsControl_cKO_hypo_dmr_63|5|0.084|0.469	0	.
chr1	4487821	4489075	P39_cKOvsControl_cKO_hypo_dmr_64|15|0.397|0.743	0	.
chr1	4506538	4506875	P39_cKOvsControl_cKO_hypo_dmr_66|7|0.424|0.822	0	.
chr1	4519630	4519995	P39_cKOvsControl_cKO_hypo_dmr_68|7|0.323|0.840	0	.
chr1	4527454	4528307	P39_cKOvsControl_cKO_hypo_dmr_69|7|0.207|0.531	0	.
chr1	4543458	4544272	P39_cKOvsControl_cKO_hypo_dmr_71|13|0.375|0.828	0	.
chr1	4572354	4572534	P39_cKOvsControl_cKO_hypo_dmr_73|5|0.145|0.504	0	.
chr1	4608932	4609028	P39_cKOvsControl_cKO_hypo_dmr_75|3|0.203|0.634	0	.
chr1	4611492	4612097	P39_cKOvsControl_cKO_hypo_dmr_76|11|0.149|0.588	0	.
chr1	4640988	4641296	P39_cKOvsControl_cKO_hypo_dmr_79|8|0.038|0.588	0	.
chr1	4645135	4645418	P39_cKOvsControl_cKO_hypo_dmr_80|5|0.554|0.859	0	.
chr1	4668066	4668213	P39_cKOvsControl_cKO_hypo_dmr_84|4|0.274|0.617	0	.
chr1	4725011	4725159	P39_cKOvsControl_cKO_hypo_dmr_86|8|0.086|0.659	0	.
chr1	4770443	4770926	P39_cKOvsControl_cKO_hypo_dmr_88|5|0.370|0.694	0	.
chr1	4802678	4802815	P39_cKOvsControl_cKO_hypo_dmr_89|8|0.123|0.582	0	.
chr1	4812453	4812878	P39_cKOvsControl_cKO_hypo_dmr_90|7|0.215|0.550	0	.
chr1	4819575	4821185	P39_cKOvsControl_cKO_hypo_dmr_91|20|0.256|0.724	0	.
chr1	4829498	4829521	P39_cKOvsControl_cKO_hypo_dmr_92|3|0.274|0.757	0	.
chr1	4914696	4915017	P39_cKOvsControl_cKO_hypo_dmr_93|4|0.064|0.604	0	.
chr1	4917600	4917642	P39_cKOvsControl_cKO_hypo_dmr_94|4|0.035|0.404	0	.
chr1	4923968	4924083	P39_cKOvsControl_cKO_hypo_dmr_95|9|0.371|0.781	0	.
chr1	4925842	4925963	P39_cKOvsControl_cKO_hypo_dmr_96|4|0.412|0.828	0	.
chr1	4930142	4930284	P39_cKOvsControl_cKO_hypo_dmr_97|7|0.360|0.890	0	.
chr1	4934577	4934621	P39_cKOvsControl_cKO_hypo_dmr_98|3|0.463|0.807	0	.
chr1	4938659	4938796	P39_cKOvsControl_cKO_hypo_dmr_99|3|0.359|0.747	0	.
chr1	4939952	4939970	P39_cKOvsControl_cKO_hypo_dmr_100|4|0.285|0.827	0	.
chr1	4969803	4970246	P39_cKOvsControl_cKO_hypo_dmr_101|12|0.043|0.810	0	.
chr1	4971020	4971279	P39_cKOvsControl_cKO_hypo_dmr_102|5|0.018|0.439	0	.
chr1	4977376	4977649	P39_cKOvsControl_cKO_hypo_dmr_103|4|0.361|0.770	0	.
chr1	5012900	5013143	P39_cKOvsControl_cKO_hypo_dmr_104|5|0.043|0.446	0	.
chr1	5016389	5016608	P39_cKOvsControl_cKO_hypo_dmr_105|7|0.238|0.714	0	.
chr1	5024174	5025381	P39_cKOvsControl_cKO_hypo_dmr_106|19|0.165|0.628	0	.
chr1	5027828	5028185	P39_cKOvsControl_cKO_hypo_dmr_107|4|0.430|0.837	0	.
chr1	5033483	5033750	P39_cKOvsControl_cKO_hypo_dmr_109|7|0.149|0.612	0	.
chr1	5223410	5223832	P39_cKOvsControl_cKO_hypo_dmr_112|3|0.520|0.832	0	.
chr1	5232240	5233136	P39_cKOvsControl_cKO_hypo_dmr_114|4|0.035|0.403	0	.
chr1	5261300	5261420	P39_cKOvsControl_cKO_hypo_dmr_115|3|0.027|0.667	0	.
chr1	5280839	5281075	P39_cKOvsControl_cKO_hypo_dmr_117|4|0.382|0.806	0	.
chr1	5286035	5286336	P39_cKOvsControl_cKO_hypo_dmr_118|9|0.404|0.761	0	.
chr1	5398484	5398961	P39_cKOvsControl_cKO_hypo_dmr_119|3|0.106|0.544	0	.
chr1	5587131	5587659	P39_cKOvsControl_cKO_hypo_dmr_121|4|0.434|0.763	0	.
chr1	5588221	5588297	P39_cKOvsControl_cKO_hypo_dmr_122|3|0.021|0.466	0	.
chr1	5589155	5589326	P39_cKOvsControl_cKO_hypo_dmr_123|6|0.437|0.768	0	.
chr1	5657232	5657508	P39_cKOvsControl_cKO_hypo_dmr_125|3|0.321|0.636	0	.
chr1	5659835	5659844	P39_cKOvsControl_cKO_hypo_dmr_126|3|0.509|0.835	0	.
chr1	5759407	5759479	P39_cKOvsControl_cKO_hypo_dmr_128|3|0.493|0.834	0	.
chr1	5913855	5914508	P39_cKOvsControl_cKO_hypo_dmr_134|6|0.491|0.804	0	.
chr1	5943462	5943814	P39_cKOvsControl_cKO_hypo_dmr_137|3|0.339|0.713	0	.
chr1	6097067	6097148	P39_cKOvsControl_cKO_hypo_dmr_139|3|0.218|0.675	0	.
chr1	6135857	6136119	P39_cKOvsControl_cKO_hypo_dmr_140|4|0.115|0.679	0	.
chr1	6136712	6137611	P39_cKOvsControl_cKO_hypo_dmr_141|9|0.309|0.740	0	.
chr1	6142894	6143300	P39_cKOvsControl_cKO_hypo_dmr_142|7|0.198|0.679	0	.
chr1	6288019	6288919	P39_cKOvsControl_cKO_hypo_dmr_143|7|0.133|0.442	0	.
chr1	6289845	6290305	P39_cKOvsControl_cKO_hypo_dmr_144|8|0.215|0.549	0	.
chr1	6356571	6357196	P39_cKOvsControl_cKO_hypo_dmr_146|7|0.520|0.845	0	.
chr1	6359856	6360486	P39_cKOvsControl_cKO_hypo_dmr_147|9|0.302|0.753	0	.
chr1	6380630	6380902	P39_cKOvsControl_cKO_hypo_dmr_149|6|0.406|0.876	0	.
chr1	6382021	6382264	P39_cKOvsControl_cKO_hypo_dmr_150|5|0.270|0.667	0	.
chr1	6389480	6389513	P39_cKOvsControl_cKO_hypo_dmr_152|5|0.241|0.609	0	.
chr1	6404271	6404755	P39_cKOvsControl_cKO_hypo_dmr_154|5|0.601|0.906	0	.
chr1	6405935	6405959	P39_cKOvsControl_cKO_hypo_dmr_155|3|0.518|0.881	0	.
chr1	6416405	6417292	P39_cKOvsControl_cKO_hypo_dmr_157|9|0.463|0.846	0	.
chr1	6447782	6448564	P39_cKOvsControl_cKO_hypo_dmr_158|6|0.354|0.744	0	.
chr1	6452511	6453115	P39_cKOvsControl_cKO_hypo_dmr_160|4|0.487|0.840	0	.
chr1	6454102	6454605	P39_cKOvsControl_cKO_hypo_dmr_161|5|0.497|0.832	0	.
chr1	6465516	6465911	P39_cKOvsControl_cKO_hypo_dmr_162|3|0.558|0.904	0	.
chr1	6469286	6469794	P39_cKOvsControl_cKO_hypo_dmr_164|5|0.543|0.858	0	.
chr1	6479451	6479866	P39_cKOvsControl_cKO_hypo_dmr_167|5|0.541|0.907	0	.
chr1	6481627	6482492	P39_cKOvsControl_cKO_hypo_dmr_168|11|0.477|0.779	0	.
chr1	6485201	6485299	P39_cKOvsControl_cKO_hypo_dmr_169|6|0.152|0.646	0	.
chr1	6488842	6488954	P39_cKOvsControl_cKO_hypo_dmr_170|3|0.349|0.670	0	.
chr1	6492177	6492924	P39_cKOvsControl_cKO_hypo_dmr_171|5|0.535|0.861	0	.
chr1	6493628	6494151	P39_cKOvsControl_cKO_hypo_dmr_172|5|0.464|0.871	0	.
chr1	6510310	6510599	P39_cKOvsControl_cKO_hypo_dmr_174|5|0.480|0.792	0	.
chr1	6520854	6521531	P39_cKOvsControl_cKO_hypo_dmr_175|5|0.137|0.499	0	.
chr1	6523651	6523757	P39_cKOvsControl_cKO_hypo_dmr_176|3|0.476|0.830	0	.
chr1	6526609	6527294	P39_cKOvsControl_cKO_hypo_dmr_178|9|0.346|0.838	0	.
chr1	6592945	6593041	P39_cKOvsControl_cKO_hypo_dmr_179|3|0.274|0.712	0	.
chr1	6604485	6604538	P39_cKOvsControl_cKO_hypo_dmr_181|4|0.558|0.874	0	.
chr1	6640293	6640756	P39_cKOvsControl_cKO_hypo_dmr_182|4|0.525|0.849	0	.
chr1	6656727	6658773	P39_cKOvsControl_cKO_hypo_dmr_183|19|0.519|0.856	0	.
chr1	6659567	6660473	P39_cKOvsControl_cKO_hypo_dmr_184|6|0.344|0.740	0	.
chr1	6706448	6706598	P39_cKOvsControl_cKO_hypo_dmr_186|10|0.142|0.664	0	.
chr1	6710891	6710981	P39_cKOvsControl_cKO_hypo_dmr_187|4|0.470|0.909	0	.
chr1	6716520	6716686	P39_cKOvsControl_cKO_hypo_dmr_188|6|0.355|0.723	0	.
chr1	6718021	6718265	P39_cKOvsControl_cKO_hypo_dmr_189|5|0.286|0.672	0	.
chr1	6720633	6721134	P39_cKOvsControl_cKO_hypo_dmr_190|3|0.536|0.944	0	.
chr1	6723067	6723309	P39_cKOvsControl_cKO_hypo_dmr_191|5|0.188|0.658	0	.
chr1	6727398	6727574	P39_cKOvsControl_cKO_hypo_dmr_192|5|0.399|0.825	0	.
chr1	6728974	6730122	P39_cKOvsControl_cKO_hypo_dmr_193|28|0.032|0.456	0	.
chr1	6732917	6735640	P39_cKOvsControl_cKO_hypo_dmr_194|36|0.128|0.592	0	.
chr1	6736246	6736566	P39_cKOvsControl_cKO_hypo_dmr_195|8|0.466|0.816	0	.
chr1	6738924	6739987	P39_cKOvsControl_cKO_hypo_dmr_196|10|0.498|0.816	0	.
chr1	6751197	6751297	P39_cKOvsControl_cKO_hypo_dmr_199|6|0.289|0.874	0	.
chr1	6751900	6752403	P39_cKOvsControl_cKO_hypo_dmr_200|4|0.111|0.824	0	.
chr1	6757651	6757891	P39_cKOvsControl_cKO_hypo_dmr_201|8|0.108|0.818	0	.
chr1	6758597	6758906	P39_cKOvsControl_cKO_hypo_dmr_202|6|0.604|0.947	0	.
chr1	6759477	6759585	P39_cKOvsControl_cKO_hypo_dmr_203|4|0.231|0.901	0	.
chr1	6763784	6764018	P39_cKOvsControl_cKO_hypo_dmr_205|3|0.576|0.904	0	.
chr1	6788542	6790472	P39_cKOvsControl_cKO_hypo_dmr_209|15|0.414|0.746	0	.
chr1	6800219	6800676	P39_cKOvsControl_cKO_hypo_dmr_212|10|0.151|0.796	0	.
chr1	6803187	6803602	P39_cKOvsControl_cKO_hypo_dmr_213|7|0.606|0.915	0	.
chr1	6805098	6806045	P39_cKOvsControl_cKO_hypo_dmr_214|15|0.255|0.793	0	.
chr1	6819897	6821910	P39_cKOvsControl_cKO_hypo_dmr_217|35|0.457|0.859	0	.
chr1	6824984	6825340	P39_cKOvsControl_cKO_hypo_dmr_218|8|0.247|0.685	0	.
chr1	6829795	6830354	P39_cKOvsControl_cKO_hypo_dmr_221|12|0.086|0.657	0	.
chr1	6831723	6832116	P39_cKOvsControl_cKO_hypo_dmr_222|3|0.457|0.786	0	.
chr1	6832837	6833170	P39_cKOvsControl_cKO_hypo_dmr_223|3|0.201|0.684	0	.
chr1	6855746	6856329	P39_cKOvsControl_cKO_hypo_dmr_224|3|0.253|0.597	0	.
chr1	6857564	6857855	P39_cKOvsControl_cKO_hypo_dmr_225|3|0.448|0.774	0	.
chr1	6866659	6867567	P39_cKOvsControl_cKO_hypo_dmr_229|8|0.093|0.416	0	.
chr1	6869667	6869833	P39_cKOvsControl_cKO_hypo_dmr_230|4|0.110|0.800	0	.
chr1	6870664	6870972	P39_cKOvsControl_cKO_hypo_dmr_231|4|0.241|0.804	0	.
chr1	6898189	6898619	P39_cKOvsControl_cKO_hypo_dmr_233|7|0.287|0.865	0	.
chr1	6902445	6902735	P39_cKOvsControl_cKO_hypo_dmr_234|3|0.453|0.843	0	.
chr1	6905512	6905906	P39_cKOvsControl_cKO_hypo_dmr_235|3|0.465|0.768	0	.
chr1	6937554	6938200	P39_cKOvsControl_cKO_hypo_dmr_237|7|0.330|0.841	0	.
chr1	6939396	6940339	P39_cKOvsControl_cKO_hypo_dmr_238|14|0.392|0.844	0	.
chr1	6973059	6973111	P39_cKOvsControl_cKO_hypo_dmr_239|4|0.465|0.852	0	.
chr1	6973689	6974125	P39_cKOvsControl_cKO_hypo_dmr_240|4|0.364|0.787	0	.
chr1	6976302	6976441	P39_cKOvsControl_cKO_hypo_dmr_241|3|0.567|0.869	0	.
chr1	6977040	6977573	P39_cKOvsControl_cKO_hypo_dmr_242|5|0.527|0.874	0	.
chr1	7047290	7047553	P39_cKOvsControl_cKO_hypo_dmr_245|3|0.272|0.678	0	.
chr1	7054939	7055223	P39_cKOvsControl_cKO_hypo_dmr_246|4|0.533|0.862	0	.
chr1	7201741	7201904	P39_cKOvsControl_cKO_hypo_dmr_251|6|0.214|0.823	0	.
chr1	7207046	7207535	P39_cKOvsControl_cKO_hypo_dmr_252|4|0.056|0.356	0	.
chr1	7225144	7225293	P39_cKOvsControl_cKO_hypo_dmr_253|3|0.042|0.716	0	.
chr1	7309116	7309680	P39_cKOvsControl_cKO_hypo_dmr_254|6|0.418|0.814	0	.
chr1	7313379	7313739	P39_cKOvsControl_cKO_hypo_dmr_255|6|0.192|0.639	0	.
chr1	7319025	7320007	P39_cKOvsControl_cKO_hypo_dmr_256|10|0.090|0.430	0	.
chr1	7347314	7347325	P39_cKOvsControl_cKO_hypo_dmr_257|4|0.406|0.761	0	.
chr1	7414873	7414922	P39_cKOvsControl_cKO_hypo_dmr_260|3|0.431|0.862	0	.
chr1	7421490	7421509	P39_cKOvsControl_cKO_hypo_dmr_263|4|0.034|0.388	0	.
chr1	7501225	7501262	P39_cKOvsControl_cKO_hypo_dmr_264|4|0.426|0.815	0	.
chr1	7544625	7544713	P39_cKOvsControl_cKO_hypo_dmr_266|3|0.379|0.848	0	.
chr1	7671976	7672338	P39_cKOvsControl_cKO_hypo_dmr_267|4|0.224|0.605	0	.
chr1	7777031	7778488	P39_cKOvsControl_cKO_hypo_dmr_269|18|0.100|0.496	0	.
chr1	7779253	7779689	P39_cKOvsControl_cKO_hypo_dmr_270|4|0.207|0.726	0	.
chr1	7971574	7971729	P39_cKOvsControl_cKO_hypo_dmr_272|4|0.389|0.805	0	.
chr1	8060770	8060890	P39_cKOvsControl_cKO_hypo_dmr_273|3|0.229|0.571	0	.
chr1	8262504	8262851	P39_cKOvsControl_cKO_hypo_dmr_275|5|0.168|0.595	0	.
chr1	8267355	8267555	P39_cKOvsControl_cKO_hypo_dmr_276|3|0.173|0.529	0	.
chr1	8494236	8494739	P39_cKOvsControl_cKO_hypo_dmr_279|8|0.366|0.691	0	.
chr1	8557924	8559082	P39_cKOvsControl_cKO_hypo_dmr_280|7|0.490|0.805	0	.
chr1	8565404	8565552	P39_cKOvsControl_cKO_hypo_dmr_281|6|0.213|0.800	0	.
chr1	8572583	8572799	P39_cKOvsControl_cKO_hypo_dmr_282|3|0.216|0.611	0	.
chr1	8581726	8582501	P39_cKOvsControl_cKO_hypo_dmr_283|20|0.069|0.729	0	.
chr1	8591008	8591094	P39_cKOvsControl_cKO_hypo_dmr_284|3|0.427|0.835	0	.
chr1	8626373	8627127	P39_cKOvsControl_cKO_hypo_dmr_285|4|0.233|0.662	0	.
chr1	8657589	8657620	P39_cKOvsControl_cKO_hypo_dmr_286|4|0.144|0.473	0	.
chr1	8679309	8680372	P39_cKOvsControl_cKO_hypo_dmr_287|6|0.258|0.570	0	.
chr1	8771691	8772431	P39_cKOvsControl_cKO_hypo_dmr_288|7|0.541|0.853	0	.
chr1	8859350	8859550	P39_cKOvsControl_cKO_hypo_dmr_291|3|0.613|0.913	0	.
chr1	8904671	8905093	P39_cKOvsControl_cKO_hypo_dmr_292|6|0.344|0.689	0	.
chr1	8915010	8916510	P39_cKOvsControl_cKO_hypo_dmr_294|15|0.068|0.664	0	.
chr1	8936229	8939904	P39_cKOvsControl_cKO_hypo_dmr_297|50|0.450|0.834	0	.
chr1	8956830	8957370	P39_cKOvsControl_cKO_hypo_dmr_299|5|0.522|0.845	0	.
chr1	9008501	9008694	P39_cKOvsControl_cKO_hypo_dmr_300|3|0.457|0.769	0	.
chr1	9024163	9024464	P39_cKOvsControl_cKO_hypo_dmr_301|3|0.355|0.690	0	.
chr1	9038086	9038587	P39_cKOvsControl_cKO_hypo_dmr_302|7|0.206|0.648	0	.
chr1	9150290	9150569	P39_cKOvsControl_cKO_hypo_dmr_303|3|0.297|0.682	0	.
chr1	9205738	9206619	P39_cKOvsControl_cKO_hypo_dmr_304|10|0.473|0.807	0	.
chr1	9208610	9209137	P39_cKOvsControl_cKO_hypo_dmr_306|7|0.378|0.821	0	.
chr1	9210417	9210472	P39_cKOvsControl_cKO_hypo_dmr_307|3|0.245|0.595	0	.
chr1	9211940	9212143	P39_cKOvsControl_cKO_hypo_dmr_308|4|0.429|0.753	0	.
chr1	9222342	9222396	P39_cKOvsControl_cKO_hypo_dmr_309|3|0.493|0.824	0	.
chr1	9239000	9239044	P39_cKOvsControl_cKO_hypo_dmr_310|3|0.324|0.751	0	.
chr1	9289957	9290400	P39_cKOvsControl_cKO_hypo_dmr_312|7|0.110|0.559	0	.
chr1	9300737	9301451	P39_cKOvsControl_cKO_hypo_dmr_313|6|0.090|0.508	0	.
chr1	9512511	9512701	P39_cKOvsControl_cKO_hypo_dmr_316|3|0.172|0.545	0	.
chr1	9513603	9513860	P39_cKOvsControl_cKO_hypo_dmr_317|3|0.398|0.719	0	.
chr1	9516942	9517588	P39_cKOvsControl_cKO_hypo_dmr_318|5|0.374|0.746	0	.
chr1	9526861	9526945	P39_cKOvsControl_cKO_hypo_dmr_319|3|0.495|0.879	0	.
chr1	9564237	9565351	P39_cKOvsControl_cKO_hypo_dmr_322|14|0.214|0.661	0	.
chr1	9576200	9576358	P39_cKOvsControl_cKO_hypo_dmr_324|10|0.228|0.856	0	.
chr1	9583727	9584408	P39_cKOvsControl_cKO_hypo_dmr_327|19|0.053|0.751	0	.
chr1	9621795	9621941	P39_cKOvsControl_cKO_hypo_dmr_328|5|0.218|0.548	0	.
chr1	9634504	9634622	P39_cKOvsControl_cKO_hypo_dmr_330|4|0.456|0.828	0	.
chr1	9648590	9650074	P39_cKOvsControl_cKO_hypo_dmr_331|52|0.262|0.797	0	.
chr1	9652210	9652712	P39_cKOvsControl_cKO_hypo_dmr_332|5|0.178|0.641	0	.
chr1	9658292	9659272	P39_cKOvsControl_cKO_hypo_dmr_333|25|0.452|0.843	0	.
chr1	9664564	9665224	P39_cKOvsControl_cKO_hypo_dmr_335|9|0.425|0.774	0	.
chr1	9757368	9758108	P39_cKOvsControl_cKO_hypo_dmr_336|5|0.447|0.782	0	.
chr1	9770661	9770840	P39_cKOvsControl_cKO_hypo_dmr_338|6|0.297|0.733	0	.
chr1	9771666	9771730	P39_cKOvsControl_cKO_hypo_dmr_339|3|0.539|0.855	0	.
chr1	9774211	9774417	P39_cKOvsControl_cKO_hypo_dmr_340|8|0.125|0.623	0	.
chr1	9776958	9777457	P39_cKOvsControl_cKO_hypo_dmr_341|5|0.340|0.791	0	.
chr1	9778413	9778469	P39_cKOvsControl_cKO_hypo_dmr_342|4|0.639|0.942	0	.
chr1	9805024	9806153	P39_cKOvsControl_cKO_hypo_dmr_346|17|0.331|0.651	0	.
chr1	9839686	9839736	P39_cKOvsControl_cKO_hypo_dmr_349|3|0.317|0.643	0	.
chr1	9841903	9842372	P39_cKOvsControl_cKO_hypo_dmr_350|11|0.380|0.813	0	.
chr1	9847468	9847664	P39_cKOvsControl_cKO_hypo_dmr_351|3|0.343|0.728	0	.
chr1	9849772	9850062	P39_cKOvsControl_cKO_hypo_dmr_352|7|0.089|0.427	0	.
chr1	9850660	9850831	P39_cKOvsControl_cKO_hypo_dmr_353|7|0.250|0.745	0	.
chr1	9851508	9851837	P39_cKOvsControl_cKO_hypo_dmr_354|7|0.305|0.699	0	.
chr1	9880429	9880526	P39_cKOvsControl_cKO_hypo_dmr_358|6|0.504|0.886	0	.
chr1	9881474	9882812	P39_cKOvsControl_cKO_hypo_dmr_359|19|0.398|0.714	0	.
chr1	9888884	9888957	P39_cKOvsControl_cKO_hypo_dmr_360|4|0.474|0.875	0	.
chr1	9889752	9889952	P39_cKOvsControl_cKO_hypo_dmr_361|5|0.315|0.735	0	.
chr1	9952984	9953744	P39_cKOvsControl_cKO_hypo_dmr_363|17|0.096|0.495	0	.
chr1	9961101	9961400	P39_cKOvsControl_cKO_hypo_dmr_365|3|0.591|0.911	0	.
chr1	9965573	9966941	P39_cKOvsControl_cKO_hypo_dmr_368|15|0.508|0.819	0	.
chr1	9968489	9969100	P39_cKOvsControl_cKO_hypo_dmr_369|17|0.253|0.685	0	.
chr1	9980778	9980893	P39_cKOvsControl_cKO_hypo_dmr_373|3|0.249|0.605	0	.
chr1	9988675	9989235	P39_cKOvsControl_cKO_hypo_dmr_374|8|0.569|0.871	0	.
chr1	10009488	10009927	P39_cKOvsControl_cKO_hypo_dmr_378|12|0.228|0.548	0	.
chr1	10013652	10015067	P39_cKOvsControl_cKO_hypo_dmr_379|12|0.121|0.438	0	.
chr1	10045842	10045903	P39_cKOvsControl_cKO_hypo_dmr_380|3|0.401|0.783	0	.
chr1	10115865	10116362	P39_cKOvsControl_cKO_hypo_dmr_382|10|0.218|0.658	0	.
chr1	10257691	10257793	P39_cKOvsControl_cKO_hypo_dmr_383|5|0.393|0.775	0	.
chr1	10260921	10261148	P39_cKOvsControl_cKO_hypo_dmr_384|3|0.245|0.649	0	.
chr1	10262911	10263089	P39_cKOvsControl_cKO_hypo_dmr_385|5|0.347|0.816	0	.
chr1	10281579	10281728	P39_cKOvsControl_cKO_hypo_dmr_387|4|0.618|0.934	0	.
chr1	10285221	10285486	P39_cKOvsControl_cKO_hypo_dmr_388|4|0.446|0.848	0	.
chr1	10300281	10300786	P39_cKOvsControl_cKO_hypo_dmr_389|5|0.089|0.429	0	.
chr1	10337454	10338905	P39_cKOvsControl_cKO_hypo_dmr_391|20|0.370|0.688	0	.
chr1	10347270	10347344	P39_cKOvsControl_cKO_hypo_dmr_392|4|0.410|0.883	0	.
chr1	10360846	10360904	P39_cKOvsControl_cKO_hypo_dmr_393|3|0.306|0.771	0	.
chr1	10372346	10372497	P39_cKOvsControl_cKO_hypo_dmr_394|3|0.361|0.786	0	.
chr1	10397215	10397934	P39_cKOvsControl_cKO_hypo_dmr_396|4|0.346|0.743	0	.
chr1	10403806	10404656	P39_cKOvsControl_cKO_hypo_dmr_397|12|0.095|0.643	0	.
chr1	10407635	10407766	P39_cKOvsControl_cKO_hypo_dmr_398|4|0.574|0.881	0	.
chr1	10452702	10452784	P39_cKOvsControl_cKO_hypo_dmr_399|3|0.094|0.468	0	.
chr1	10477056	10477611	P39_cKOvsControl_cKO_hypo_dmr_400|11|0.283|0.838	0	.
chr1	10482051	10482155	P39_cKOvsControl_cKO_hypo_dmr_402|3|0.421|0.733	0	.
chr1	10483724	10484400	P39_cKOvsControl_cKO_hypo_dmr_403|7|0.114|0.437	0	.
chr1	10581628	10581867	P39_cKOvsControl_cKO_hypo_dmr_406|4|0.355|0.724	0	.
chr1	10588879	10589461	P39_cKOvsControl_cKO_hypo_dmr_407|4|0.514|0.819	0	.
chr1	10591045	10591504	P39_cKOvsControl_cKO_hypo_dmr_408|5|0.102|0.715	0	.
chr1	10595303	10595542	P39_cKOvsControl_cKO_hypo_dmr_409|6|0.260|0.831	0	.
chr1	10596980	10596997	P39_cKOvsControl_cKO_hypo_dmr_410|4|0.031|0.388	0	.
chr1	10598356	10598953	P39_cKOvsControl_cKO_hypo_dmr_411|4|0.433|0.801	0	.
chr1	10636244	10636488	P39_cKOvsControl_cKO_hypo_dmr_413|3|0.244|0.668	0	.
chr1	10637248	10637339	P39_cKOvsControl_cKO_hypo_dmr_414|3|0.188|0.500	0	.
chr1	10681414	10682246	P39_cKOvsControl_cKO_hypo_dmr_417|17|0.390|0.846	0	.
chr1	10693294	10693341	P39_cKOvsControl_cKO_hypo_dmr_418|3|0.507|0.887	0	.
chr1	10693960	10695013	P39_cKOvsControl_cKO_hypo_dmr_419|13|0.426|0.790	0	.
chr1	10698993	10699285	P39_cKOvsControl_cKO_hypo_dmr_421|4|0.286|0.678	0	.
chr1	10706787	10706953	P39_cKOvsControl_cKO_hypo_dmr_423|3|0.411|0.872	0	.
chr1	10707561	10707917	P39_cKOvsControl_cKO_hypo_dmr_424|7|0.226|0.763	0	.
chr1	10712287	10712632	P39_cKOvsControl_cKO_hypo_dmr_426|4|0.610|0.926	0	.
chr1	10717253	10719628	P39_cKOvsControl_cKO_hypo_dmr_427|34|0.237|0.630	0	.
chr1	10757297	10757449	P39_cKOvsControl_cKO_hypo_dmr_428|3|0.274|0.597	0	.
chr1	10793890	10794676	P39_cKOvsControl_cKO_hypo_dmr_432|13|0.050|0.675	0	.
chr1	10836249	10836416	P39_cKOvsControl_cKO_hypo_dmr_434|5|0.186|0.559	0	.
chr1	10850208	10850350	P39_cKOvsControl_cKO_hypo_dmr_435|4|0.233|0.772	0	.
chr1	10854785	10854952	P39_cKOvsControl_cKO_hypo_dmr_436|3|0.313|0.625	0	.
chr1	10866176	10866468	P39_cKOvsControl_cKO_hypo_dmr_437|5|0.184|0.589	0	.
chr1	10871868	10871970	P39_cKOvsControl_cKO_hypo_dmr_438|4|0.158|0.528	0	.
chr1	10877942	10878632	P39_cKOvsControl_cKO_hypo_dmr_439|4|0.500|0.815	0	.
chr1	10880026	10880100	P39_cKOvsControl_cKO_hypo_dmr_440|5|0.511|0.847	0	.
chr1	10919686	10920231	P39_cKOvsControl_cKO_hypo_dmr_443|6|0.091|0.608	0	.
chr1	10932555	10933051	P39_cKOvsControl_cKO_hypo_dmr_444|6|0.414|0.846	0	.
chr1	10937970	10938631	P39_cKOvsControl_cKO_hypo_dmr_445|6|0.312|0.804	0	.
chr1	10943062	10943439	P39_cKOvsControl_cKO_hypo_dmr_446|9|0.132|0.501	0	.
chr1	10953415	10953510	P39_cKOvsControl_cKO_hypo_dmr_448|6|0.233|0.770	0	.
chr1	10990580	10991232	P39_cKOvsControl_cKO_hypo_dmr_449|7|0.163|0.745	0	.
chr1	11018778	11019296	P39_cKOvsControl_cKO_hypo_dmr_455|10|0.343|0.744	0	.
chr1	11022811	11023174	P39_cKOvsControl_cKO_hypo_dmr_457|6|0.378|0.774	0	.
chr1	11024039	11025523	P39_cKOvsControl_cKO_hypo_dmr_458|17|0.270|0.710	0	.
chr1	11027293	11027434	P39_cKOvsControl_cKO_hypo_dmr_459|5|0.247|0.660	0	.
chr1	11033706	11033740	P39_cKOvsControl_cKO_hypo_dmr_461|4|0.033|0.455	0	.
chr1	11034924	11035231	P39_cKOvsControl_cKO_hypo_dmr_462|7|0.522|0.885	0	.
chr1	11045817	11046643	P39_cKOvsControl_cKO_hypo_dmr_464|7|0.125|0.547	0	.
chr1	11056811	11057050	P39_cKOvsControl_cKO_hypo_dmr_465|3|0.380|0.796	0	.
chr1	11058850	11059344	P39_cKOvsControl_cKO_hypo_dmr_466|5|0.283|0.759	0	.
chr1	11065869	11066438	P39_cKOvsControl_cKO_hypo_dmr_467|7|0.141|0.601	0	.
chr1	11089670	11089937	P39_cKOvsControl_cKO_hypo_dmr_468|10|0.100|0.660	0	.
chr1	11090986	11091185	P39_cKOvsControl_cKO_hypo_dmr_469|4|0.173|0.768	0	.
chr1	11100391	11100613	P39_cKOvsControl_cKO_hypo_dmr_470|3|0.355|0.774	0	.
chr1	11105452	11105600	P39_cKOvsControl_cKO_hypo_dmr_471|6|0.128|0.747	0	.
chr1	11120066	11120711	P39_cKOvsControl_cKO_hypo_dmr_472|11|0.294|0.694	0	.
chr1	11140214	11140247	P39_cKOvsControl_cKO_hypo_dmr_474|3|0.240|0.652	0	.
chr1	11147758	11148281	P39_cKOvsControl_cKO_hypo_dmr_475|6|0.433|0.758	0	.
chr1	11151104	11151275	P39_cKOvsControl_cKO_hypo_dmr_476|3|0.251|0.670	0	.
chr1	11175983	11176001	P39_cKOvsControl_cKO_hypo_dmr_478|3|0.347|0.713	0	.
chr1	11200099	11201001	P39_cKOvsControl_cKO_hypo_dmr_480|6|0.369|0.677	0	.
chr1	11203260	11203544	P39_cKOvsControl_cKO_hypo_dmr_481|4|0.266|0.700	0	.
chr1	11226280	11226398	P39_cKOvsControl_cKO_hypo_dmr_482|3|0.381|0.768	0	.
chr1	11232146	11232279	P39_cKOvsControl_cKO_hypo_dmr_483|3|0.211|0.580	0	.
chr1	11272246	11272283	P39_cKOvsControl_cKO_hypo_dmr_490|3|0.351|0.866	0	.
chr1	11274162	11274485	P39_cKOvsControl_cKO_hypo_dmr_491|8|0.391|0.838	0	.
chr1	11277330	11278460	P39_cKOvsControl_cKO_hypo_dmr_492|22|0.184|0.715	0	.
chr1	11329293	11329340	P39_cKOvsControl_cKO_hypo_dmr_494|3|0.534|0.896	0	.
chr1	11330142	11330530	P39_cKOvsControl_cKO_hypo_dmr_495|4|0.304|0.749	0	.
chr1	11349276	11349589	P39_cKOvsControl_cKO_hypo_dmr_497|3|0.411|0.736	0	.
chr1	11404856	11404983	P39_cKOvsControl_cKO_hypo_dmr_500|3|0.516|0.872	0	.
chr1	11411908	11412027	P39_cKOvsControl_cKO_hypo_dmr_501|7|0.179|0.667	0	.
chr1	11422646	11423146	P39_cKOvsControl_cKO_hypo_dmr_503|3|0.475|0.844	0	.
chr1	11459903	11460311	P39_cKOvsControl_cKO_hypo_dmr_506|3|0.205|0.545	0	.
chr1	11499901	11499936	P39_cKOvsControl_cKO_hypo_dmr_507|3|0.424|0.826	0	.
chr1	11518590	11518856	P39_cKOvsControl_cKO_hypo_dmr_509|3|0.307|0.780	0	.
chr1	11568251	11568310	P39_cKOvsControl_cKO_hypo_dmr_511|3|0.497|0.896	0	.
chr1	11585343	11585434	P39_cKOvsControl_cKO_hypo_dmr_512|4|0.236|0.645	0	.
chr1	11642404	11642717	P39_cKOvsControl_cKO_hypo_dmr_516|4|0.335|0.667	0	.
chr1	11643823	11643887	P39_cKOvsControl_cKO_hypo_dmr_517|4|0.318|0.855	0	.
chr1	11693479	11693561	P39_cKOvsControl_cKO_hypo_dmr_521|3|0.389|0.717	0	.
chr1	11748202	11748833	P39_cKOvsControl_cKO_hypo_dmr_523|7|0.010|0.539	0	.
chr1	11749334	11749373	P39_cKOvsControl_cKO_hypo_dmr_524|3|0.600|0.936	0	.
chr1	11751807	11751883	P39_cKOvsControl_cKO_hypo_dmr_525|3|0.165|0.640	0	.
chr1	11758960	11758967	P39_cKOvsControl_cKO_hypo_dmr_526|4|0.153|0.785	0	.
chr1	11759654	11759701	P39_cKOvsControl_cKO_hypo_dmr_527|6|0.184|0.803	0	.
chr1	11836302	11836382	P39_cKOvsControl_cKO_hypo_dmr_531|4|0.278|0.727	0	.
chr1	11842665	11842690	P39_cKOvsControl_cKO_hypo_dmr_532|4|0.447|0.825	0	.
chr1	11911181	11911232	P39_cKOvsControl_cKO_hypo_dmr_535|3|0.181|0.574	0	.
chr1	11930856	11932108	P39_cKOvsControl_cKO_hypo_dmr_536|10|0.248|0.679	0	.
chr1	11937058	11937711	P39_cKOvsControl_cKO_hypo_dmr_537|10|0.181|0.507	0	.
chr1	11956260	11956265	P39_cKOvsControl_cKO_hypo_dmr_538|4|0.221|0.673	0	.
chr1	11959777	11959827	P39_cKOvsControl_cKO_hypo_dmr_539|4|0.452|0.802	0	.
chr1	11966146	11966627	P39_cKOvsControl_cKO_hypo_dmr_540|5|0.360|0.828	0	.
chr1	11967213	11968065	P39_cKOvsControl_cKO_hypo_dmr_541|14|0.184|0.782	0	.
chr1	11971913	11971966	P39_cKOvsControl_cKO_hypo_dmr_542|3|0.599|0.918	0	.
chr1	11976889	11976987	P39_cKOvsControl_cKO_hypo_dmr_543|3|0.390|0.718	0	.
chr1	11980416	11980699	P39_cKOvsControl_cKO_hypo_dmr_544|7|0.214|0.677	0	.
chr1	11981732	11982792	P39_cKOvsControl_cKO_hypo_dmr_545|10|0.160|0.487	0	.
chr1	11983317	11984173	P39_cKOvsControl_cKO_hypo_dmr_546|9|0.203|0.682	0	.
chr1	11999942	12000082	P39_cKOvsControl_cKO_hypo_dmr_549|3|0.261|0.739	0	.
chr1	12000630	12000887	P39_cKOvsControl_cKO_hypo_dmr_550|7|0.018|0.501	0	.
chr1	12055455	12056304	P39_cKOvsControl_cKO_hypo_dmr_553|8|0.205|0.712	0	.
chr1	12126318	12126913	P39_cKOvsControl_cKO_hypo_dmr_556|4|0.333|0.685	0	.
chr1	12152298	12152706	P39_cKOvsControl_cKO_hypo_dmr_559|5|0.497|0.802	0	.
chr1	12179885	12180744	P39_cKOvsControl_cKO_hypo_dmr_561|9|0.343|0.757	0	.
chr1	12191280	12193933	P39_cKOvsControl_cKO_hypo_dmr_563|30|0.470|0.787	0	.
chr1	12195427	12196127	P39_cKOvsControl_cKO_hypo_dmr_564|8|0.327|0.697	0	.
chr1	12238008	12240244	P39_cKOvsControl_cKO_hypo_dmr_566|16|0.431|0.757	0	.
chr1	12250453	12250919	P39_cKOvsControl_cKO_hypo_dmr_567|4|0.193|0.740	0	.
chr1	12271823	12271902	P39_cKOvsControl_cKO_hypo_dmr_568|3|0.380|0.732	0	.
chr1	12283692	12283917	P39_cKOvsControl_cKO_hypo_dmr_569|7|0.350|0.690	0	.
chr1	12285505	12286642	P39_cKOvsControl_cKO_hypo_dmr_570|13|0.472|0.827	0	.
chr1	12292021	12292543	P39_cKOvsControl_cKO_hypo_dmr_571|7|0.569|0.890	0	.
chr1	12295884	12295987	P39_cKOvsControl_cKO_hypo_dmr_572|3|0.190|0.646	0	.
chr1	12334524	12335410	P39_cKOvsControl_cKO_hypo_dmr_573|6|0.405|0.721	0	.
chr1	12368698	12368958	P39_cKOvsControl_cKO_hypo_dmr_575|5|0.219|0.605	0	.
chr1	12398293	12399708	P39_cKOvsControl_cKO_hypo_dmr_576|19|0.168|0.680	0	.
chr1	12402088	12402398	P39_cKOvsControl_cKO_hypo_dmr_577|5|0.223|0.741	0	.
chr1	12404311	12405308	P39_cKOvsControl_cKO_hypo_dmr_578|13|0.512|0.828	0	.
chr1	12408390	12408499	P39_cKOvsControl_cKO_hypo_dmr_579|3|0.236|0.686	0	.
chr1	12410035	12410442	P39_cKOvsControl_cKO_hypo_dmr_580|12|0.005|0.537	0	.
chr1	12410967	12411033	P39_cKOvsControl_cKO_hypo_dmr_581|3|0.242|0.648	0	.
chr1	12434420	12436667	P39_cKOvsControl_cKO_hypo_dmr_583|11|0.472|0.817	0	.
chr1	12472880	12473316	P39_cKOvsControl_cKO_hypo_dmr_584|3|0.339|0.799	0	.
chr1	12478818	12479637	P39_cKOvsControl_cKO_hypo_dmr_586|10|0.433|0.839	0	.
chr1	12490218	12490286	P39_cKOvsControl_cKO_hypo_dmr_587|4|0.137|0.675	0	.
chr1	12491991	12492024	P39_cKOvsControl_cKO_hypo_dmr_588|4|0.476|0.863	0	.
chr1	12498019	12498301	P39_cKOvsControl_cKO_hypo_dmr_589|3|0.429|0.782	0	.
chr1	12504762	12504812	P39_cKOvsControl_cKO_hypo_dmr_591|3|0.035|0.487	0	.
chr1	12508044	12508434	P39_cKOvsControl_cKO_hypo_dmr_592|5|0.487|0.799	0	.
chr1	12509843	12510033	P39_cKOvsControl_cKO_hypo_dmr_593|13|0.067|0.481	0	.
chr1	12542241	12543345	P39_cKOvsControl_cKO_hypo_dmr_596|9|0.438|0.826	0	.
chr1	12552593	12552932	P39_cKOvsControl_cKO_hypo_dmr_597|6|0.536|0.865	0	.
chr1	12554405	12554574	P39_cKOvsControl_cKO_hypo_dmr_598|5|0.223|0.680	0	.
chr1	12555911	12555996	P39_cKOvsControl_cKO_hypo_dmr_599|4|0.143|0.494	0	.
chr1	12569982	12570182	P39_cKOvsControl_cKO_hypo_dmr_600|4|0.378|0.803	0	.
chr1	12571972	12572414	P39_cKOvsControl_cKO_hypo_dmr_601|12|0.159|0.624	0	.
chr1	12576438	12577490	P39_cKOvsControl_cKO_hypo_dmr_602|24|0.136|0.677	0	.
chr1	12582723	12584013	P39_cKOvsControl_cKO_hypo_dmr_604|11|0.403|0.846	0	.
chr1	12587643	12587969	P39_cKOvsControl_cKO_hypo_dmr_605|11|0.419|0.869	0	.
chr1	12608112	12608145	P39_cKOvsControl_cKO_hypo_dmr_607|3|0.128|0.446	0	.
chr1	12613324	12613732	P39_cKOvsControl_cKO_hypo_dmr_608|6|0.364|0.779	0	.
chr1	12617570	12617683	P39_cKOvsControl_cKO_hypo_dmr_610|3|0.311|0.675	0	.
chr1	12621369	12622673	P39_cKOvsControl_cKO_hypo_dmr_611|13|0.251|0.658	0	.
chr1	12636177	12637890	P39_cKOvsControl_cKO_hypo_dmr_613|30|0.200|0.727	0	.
chr1	12669408	12669891	P39_cKOvsControl_cKO_hypo_dmr_614|3|0.331|0.681	0	.
chr1	12670732	12672162	P39_cKOvsControl_cKO_hypo_dmr_615|29|0.221|0.697	0	.
chr1	12675587	12675879	P39_cKOvsControl_cKO_hypo_dmr_616|8|0.147|0.695	0	.
chr1	12683294	12684002	P39_cKOvsControl_cKO_hypo_dmr_617|9|0.346|0.774	0	.
chr1	12684684	12685152	P39_cKOvsControl_cKO_hypo_dmr_618|8|0.419|0.818	0	.
chr1	12689078	12691710	P39_cKOvsControl_cKO_hypo_dmr_619|25|0.186|0.510	0	.
chr1	12693700	12694410	P39_cKOvsControl_cKO_hypo_dmr_620|6|0.239|0.588	0	.
chr1	12695470	12695489	P39_cKOvsControl_cKO_hypo_dmr_621|3|0.272|0.691	0	.
chr1	12697770	12698434	P39_cKOvsControl_cKO_hypo_dmr_622|20|0.137|0.600	0	.
chr1	12701407	12701472	P39_cKOvsControl_cKO_hypo_dmr_624|3|0.229|0.678	0	.
chr1	12704263	12704905	P39_cKOvsControl_cKO_hypo_dmr_625|8|0.406|0.740	0	.
chr1	12711029	12711576	P39_cKOvsControl_cKO_hypo_dmr_627|7|0.225|0.671	0	.
chr1	12713460	12713768	P39_cKOvsControl_cKO_hypo_dmr_628|14|0.571|0.928	0	.
chr1	12725342	12725570	P39_cKOvsControl_cKO_hypo_dmr_630|4|0.525|0.845	0	.
chr1	12734766	12735391	P39_cKOvsControl_cKO_hypo_dmr_632|10|0.472|0.791	0	.
chr1	12743187	12743878	P39_cKOvsControl_cKO_hypo_dmr_634|6|0.481|0.791	0	.
chr1	12744425	12745633	P39_cKOvsControl_cKO_hypo_dmr_635|14|0.244|0.738	0	.
chr1	12747118	12747224	P39_cKOvsControl_cKO_hypo_dmr_636|3|0.286|0.639	0	.
chr1	12749190	12749359	P39_cKOvsControl_cKO_hypo_dmr_637|7|0.306|0.853	0	.
chr1	12753165	12754759	P39_cKOvsControl_cKO_hypo_dmr_638|20|0.305|0.686	0	.
chr1	12767470	12768380	P39_cKOvsControl_cKO_hypo_dmr_642|9|0.353|0.676	0	.
chr1	12775424	12776507	P39_cKOvsControl_cKO_hypo_dmr_643|21|0.363|0.799	0	.
chr1	12780763	12782353	P39_cKOvsControl_cKO_hypo_dmr_645|26|0.396|0.866	0	.
chr1	12783958	12786484	P39_cKOvsControl_cKO_hypo_dmr_646|28|0.368|0.701	0	.
chr1	12790368	12790770	P39_cKOvsControl_cKO_hypo_dmr_647|4|0.329|0.776	0	.
chr1	12794899	12796240	P39_cKOvsControl_cKO_hypo_dmr_648|19|0.188|0.605	0	.
chr1	12804923	12808211	P39_cKOvsControl_cKO_hypo_dmr_649|51|0.478|0.833	0	.
chr1	12809274	12809362	P39_cKOvsControl_cKO_hypo_dmr_650|5|0.310|0.766	0	.
chr1	12810802	12812487	P39_cKOvsControl_cKO_hypo_dmr_651|29|0.377|0.861	0	.
chr1	12814251	12815974	P39_cKOvsControl_cKO_hypo_dmr_652|32|0.380|0.836	0	.
chr1	12819121	12819205	P39_cKOvsControl_cKO_hypo_dmr_653|5|0.398|0.778	0	.
chr1	12821732	12821839	P39_cKOvsControl_cKO_hypo_dmr_655|3|0.581|0.905	0	.
chr1	12841743	12842619	P39_cKOvsControl_cKO_hypo_dmr_659|13|0.428|0.810	0	.
chr1	12865922	12866249	P39_cKOvsControl_cKO_hypo_dmr_665|7|0.573|0.888	0	.
chr1	12867762	12868253	P39_cKOvsControl_cKO_hypo_dmr_666|3|0.299|0.719	0	.
chr1	12871599	12873243	P39_cKOvsControl_cKO_hypo_dmr_667|31|0.397|0.892	0	.
chr1	12875424	12876347	P39_cKOvsControl_cKO_hypo_dmr_669|29|0.172|0.580	0	.
chr1	12929901	12930323	P39_cKOvsControl_cKO_hypo_dmr_676|9|0.436|0.873	0	.
chr1	12943579	12943816	P39_cKOvsControl_cKO_hypo_dmr_678|5|0.135|0.763	0	.
chr1	12949834	12951944	P39_cKOvsControl_cKO_hypo_dmr_681|22|0.425|0.735	0	.
chr1	12953136	12954532	P39_cKOvsControl_cKO_hypo_dmr_682|21|0.382|0.743	0	.
chr1	12957544	12957771	P39_cKOvsControl_cKO_hypo_dmr_684|3|0.310|0.777	0	.
chr1	12967587	12968544	P39_cKOvsControl_cKO_hypo_dmr_685|11|0.380|0.789	0	.
chr1	12969782	12970715	P39_cKOvsControl_cKO_hypo_dmr_686|13|0.373|0.845	0	.
chr1	12981144	12981432	P39_cKOvsControl_cKO_hypo_dmr_688|7|0.410|0.829	0	.
chr1	12983314	12983739	P39_cKOvsControl_cKO_hypo_dmr_689|5|0.545|0.855	0	.
chr1	12984450	12985376	P39_cKOvsControl_cKO_hypo_dmr_690|15|0.090|0.449	0	.
chr1	12987142	12987321	P39_cKOvsControl_cKO_hypo_dmr_691|8|0.199|0.736	0	.
chr1	12990217	12990490	P39_cKOvsControl_cKO_hypo_dmr_692|13|0.066|0.463	0	.
chr1	12993860	12994693	P39_cKOvsControl_cKO_hypo_dmr_693|16|0.498|0.897	0	.
chr1	13002172	13002233	P39_cKOvsControl_cKO_hypo_dmr_694|7|0.529|0.944	0	.
chr1	13004835	13006023	P39_cKOvsControl_cKO_hypo_dmr_695|19|0.208|0.562	0	.
chr1	13009874	13011859	P39_cKOvsControl_cKO_hypo_dmr_696|28|0.552|0.883	0	.
chr1	13021715	13021732	P39_cKOvsControl_cKO_hypo_dmr_700|3|0.475|0.879	0	.
chr1	13027622	13027910	P39_cKOvsControl_cKO_hypo_dmr_704|4|0.395|0.818	0	.
chr1	13031619	13032114	P39_cKOvsControl_cKO_hypo_dmr_705|6|0.424|0.806	0	.
chr1	13039952	13040777	P39_cKOvsControl_cKO_hypo_dmr_707|11|0.322|0.710	0	.
chr1	13045857	13046384	P39_cKOvsControl_cKO_hypo_dmr_708|10|0.075|0.487	0	.
chr1	13047107	13047175	P39_cKOvsControl_cKO_hypo_dmr_709|6|0.292|0.688	0	.
chr1	13059602	13059691	P39_cKOvsControl_cKO_hypo_dmr_710|3|0.552|0.899	0	.
chr1	13067818	13068646	P39_cKOvsControl_cKO_hypo_dmr_711|14|0.591|0.905	0	.
chr1	13070973	13071197	P39_cKOvsControl_cKO_hypo_dmr_712|3|0.415|0.737	0	.
chr1	13074177	13075079	P39_cKOvsControl_cKO_hypo_dmr_713|26|0.142|0.824	0	.
chr1	13080823	13081379	P39_cKOvsControl_cKO_hypo_dmr_715|6|0.292|0.664	0	.
chr1	13084627	13085093	P39_cKOvsControl_cKO_hypo_dmr_717|5|0.243|0.764	0	.
chr1	13088169	13088353	P39_cKOvsControl_cKO_hypo_dmr_718|3|0.308|0.709	0	.
chr1	13091970	13096360	P39_cKOvsControl_cKO_hypo_dmr_719|56|0.442|0.802	0	.
chr1	13104358	13105399	P39_cKOvsControl_cKO_hypo_dmr_722|34|0.448|0.774	0	.
chr1	13111449	13112034	P39_cKOvsControl_cKO_hypo_dmr_724|6|0.268|0.756	0	.
chr1	13116777	13116789	P39_cKOvsControl_cKO_hypo_dmr_725|4|0.323|0.816	0	.
chr1	13121851	13122311	P39_cKOvsControl_cKO_hypo_dmr_727|10|0.554|0.951	0	.
chr1	13123967	13124461	P39_cKOvsControl_cKO_hypo_dmr_728|4|0.228|0.593	0	.
chr1	13128818	13129926	P39_cKOvsControl_cKO_hypo_dmr_729|18|0.173|0.696	0	.
chr1	13131381	13133039	P39_cKOvsControl_cKO_hypo_dmr_730|15|0.458|0.888	0	.
chr1	13141182	13142391	P39_cKOvsControl_cKO_hypo_dmr_732|17|0.415|0.719	0	.
chr1	13142896	13143152	P39_cKOvsControl_cKO_hypo_dmr_733|8|0.424|0.759	0	.
chr1	13152772	13153138	P39_cKOvsControl_cKO_hypo_dmr_734|6|0.256|0.603	0	.
chr1	13168229	13168304	P39_cKOvsControl_cKO_hypo_dmr_736|4|0.352|0.708	0	.
chr1	13171236	13171387	P39_cKOvsControl_cKO_hypo_dmr_737|7|0.032|0.497	0	.
chr1	13176162	13176363	P39_cKOvsControl_cKO_hypo_dmr_738|3|0.432|0.800	0	.
chr1	13183230	13183359	P39_cKOvsControl_cKO_hypo_dmr_741|8|0.283|0.780	0	.
chr1	13184981	13185214	P39_cKOvsControl_cKO_hypo_dmr_742|8|0.118|0.696	0	.
chr1	13185855	13185863	P39_cKOvsControl_cKO_hypo_dmr_743|4|0.277|0.848	0	.
chr1	13190888	13191533	P39_cKOvsControl_cKO_hypo_dmr_744|8|0.159|0.479	0	.
chr1	13193851	13194774	P39_cKOvsControl_cKO_hypo_dmr_745|11|0.275|0.633	0	.
chr1	13195940	13196431	P39_cKOvsControl_cKO_hypo_dmr_746|9|0.150|0.490	0	.
chr1	13217530	13217869	P39_cKOvsControl_cKO_hypo_dmr_748|5|0.389|0.696	0	.
chr1	13223439	13223524	P39_cKOvsControl_cKO_hypo_dmr_750|4|0.218|0.635	0	.
chr1	13230466	13231136	P39_cKOvsControl_cKO_hypo_dmr_751|11|0.176|0.539	0	.
chr1	13235161	13235520	P39_cKOvsControl_cKO_hypo_dmr_752|7|0.440|0.768	0	.
chr1	13246879	13247627	P39_cKOvsControl_cKO_hypo_dmr_755|17|0.347|0.741	0	.
chr1	13253498	13254306	P39_cKOvsControl_cKO_hypo_dmr_758|8|0.413|0.791	0	.
chr1	13262372	13262495	P39_cKOvsControl_cKO_hypo_dmr_760|6|0.367|0.847	0	.
chr1	13273285	13273903	P39_cKOvsControl_cKO_hypo_dmr_761|5|0.463|0.795	0	.
chr1	13286560	13287208	P39_cKOvsControl_cKO_hypo_dmr_762|13|0.196|0.549	0	.
chr1	13289748	13291439	P39_cKOvsControl_cKO_hypo_dmr_763|20|0.449|0.797	0	.
chr1	13292020	13292150	P39_cKOvsControl_cKO_hypo_dmr_764|4|0.475|0.870	0	.
chr1	13292792	13293507	P39_cKOvsControl_cKO_hypo_dmr_765|14|0.252|0.609	0	.
chr1	13296513	13297120	P39_cKOvsControl_cKO_hypo_dmr_766|15|0.421|0.782	0	.
chr1	13311467	13312735	P39_cKOvsControl_cKO_hypo_dmr_769|21|0.270|0.657	0	.
chr1	13313899	13314407	P39_cKOvsControl_cKO_hypo_dmr_770|9|0.041|0.503	0	.
chr1	13321764	13321998	P39_cKOvsControl_cKO_hypo_dmr_773|4|0.344|0.684	0	.
chr1	13330635	13331041	P39_cKOvsControl_cKO_hypo_dmr_775|16|0.235|0.798	0	.
chr1	13331633	13333997	P39_cKOvsControl_cKO_hypo_dmr_776|18|0.417|0.732	0	.
chr1	13339907	13340711	P39_cKOvsControl_cKO_hypo_dmr_777|17|0.392|0.706	0	.
chr1	13343184	13343742	P39_cKOvsControl_cKO_hypo_dmr_778|6|0.393|0.724	0	.
chr1	13352747	13352822	P39_cKOvsControl_cKO_hypo_dmr_782|4|0.188|0.646	0	.
chr1	13354935	13355214	P39_cKOvsControl_cKO_hypo_dmr_783|10|0.307|0.689	0	.
chr1	13356425	13356567	P39_cKOvsControl_cKO_hypo_dmr_784|4|0.141|0.566	0	.
chr1	13358551	13358605	P39_cKOvsControl_cKO_hypo_dmr_785|4|0.468|0.933	0	.
chr1	13360511	13360570	P39_cKOvsControl_cKO_hypo_dmr_786|3|0.329|0.721	0	.
chr1	13363930	13364209	P39_cKOvsControl_cKO_hypo_dmr_787|11|0.204|0.650	0	.
chr1	13382726	13382806	P39_cKOvsControl_cKO_hypo_dmr_791|3|0.292|0.809	0	.
chr1	13389947	13390660	P39_cKOvsControl_cKO_hypo_dmr_795|8|0.491|0.856	0	.
chr1	13391635	13392458	P39_cKOvsControl_cKO_hypo_dmr_796|6|0.534|0.859	0	.
chr1	13398729	13399454	P39_cKOvsControl_cKO_hypo_dmr_797|5|0.322|0.713	0	.
chr1	13407771	13407871	P39_cKOvsControl_cKO_hypo_dmr_799|5|0.536|0.948	0	.
chr1	13416436	13416735	P39_cKOvsControl_cKO_hypo_dmr_801|5|0.306|0.783	0	.
chr1	13427240	13429141	P39_cKOvsControl_cKO_hypo_dmr_804|21|0.326|0.686	0	.
chr1	13433744	13433949	P39_cKOvsControl_cKO_hypo_dmr_805|13|0.467|0.920	0	.
chr1	13442759	13442852	P39_cKOvsControl_cKO_hypo_dmr_809|3|0.328|0.758	0	.
chr1	13464787	13465794	P39_cKOvsControl_cKO_hypo_dmr_811|9|0.617|0.934	0	.
chr1	13466825	13467289	P39_cKOvsControl_cKO_hypo_dmr_812|11|0.345|0.822	0	.
chr1	13468192	13468259	P39_cKOvsControl_cKO_hypo_dmr_813|3|0.128|0.757	0	.
chr1	13470012	13470202	P39_cKOvsControl_cKO_hypo_dmr_814|4|0.508|0.825	0	.
chr1	13487610	13487709	P39_cKOvsControl_cKO_hypo_dmr_815|3|0.098|0.466	0	.
chr1	13490184	13490273	P39_cKOvsControl_cKO_hypo_dmr_817|5|0.341|0.832	0	.
chr1	13499986	13500297	P39_cKOvsControl_cKO_hypo_dmr_819|6|0.427|0.817	0	.
chr1	13544381	13545606	P39_cKOvsControl_cKO_hypo_dmr_822|17|0.390|0.794	0	.
chr1	13559265	13559571	P39_cKOvsControl_cKO_hypo_dmr_823|6|0.583|0.933	0	.
chr1	13572237	13573395	P39_cKOvsControl_cKO_hypo_dmr_825|14|0.424|0.827	0	.
chr1	13574650	13576682	P39_cKOvsControl_cKO_hypo_dmr_826|41|0.412|0.800	0	.
chr1	13587280	13587723	P39_cKOvsControl_cKO_hypo_dmr_829|13|0.558|0.859	0	.
chr1	13596592	13596640	P39_cKOvsControl_cKO_hypo_dmr_831|3|0.605|0.925	0	.
chr1	13607454	13608102	P39_cKOvsControl_cKO_hypo_dmr_832|5|0.497|0.811	0	.
chr1	13615591	13615909	P39_cKOvsControl_cKO_hypo_dmr_833|5|0.338|0.707	0	.
chr1	13621240	13621494	P39_cKOvsControl_cKO_hypo_dmr_834|7|0.489|0.867	0	.
chr1	13623445	13623476	P39_cKOvsControl_cKO_hypo_dmr_835|3|0.500|0.854	0	.
chr1	13627874	13627941	P39_cKOvsControl_cKO_hypo_dmr_836|4|0.282|0.637	0	.
chr1	13634396	13634730	P39_cKOvsControl_cKO_hypo_dmr_839|4|0.408|0.749	0	.
chr1	13649255	13650232	P39_cKOvsControl_cKO_hypo_dmr_840|25|0.154|0.604	0	.
chr1	13658559	13659019	P39_cKOvsControl_cKO_hypo_dmr_842|5|0.326|0.686	0	.
chr1	13670672	13671699	P39_cKOvsControl_cKO_hypo_dmr_844|7|0.484|0.786	0	.
chr1	13695353	13695459	P39_cKOvsControl_cKO_hypo_dmr_847|4|0.536|0.934	0	.
chr1	13700007	13700084	P39_cKOvsControl_cKO_hypo_dmr_848|3|0.335|0.746	0	.
chr1	13707055	13707870	P39_cKOvsControl_cKO_hypo_dmr_849|13|0.463|0.833	0	.
chr1	13771082	13772987	P39_cKOvsControl_cKO_hypo_dmr_851|19|0.485|0.805	0	.
chr1	13776708	13777333	P39_cKOvsControl_cKO_hypo_dmr_852|15|0.603|0.938	0	.
chr1	13787300	13788277	P39_cKOvsControl_cKO_hypo_dmr_856|24|0.441|0.854	0	.
chr1	13808405	13808817	P39_cKOvsControl_cKO_hypo_dmr_858|4|0.271|0.816	0	.
chr1	13825180	13825294	P39_cKOvsControl_cKO_hypo_dmr_860|4|0.596|0.978	0	.
chr1	13845573	13847293	P39_cKOvsControl_cKO_hypo_dmr_866|28|0.388|0.716	0	.
chr1	13858540	13858976	P39_cKOvsControl_cKO_hypo_dmr_869|12|0.009|0.702	0	.
chr1	13859959	13862252	P39_cKOvsControl_cKO_hypo_dmr_870|35|0.240|0.863	0	.
chr1	13864430	13864735	P39_cKOvsControl_cKO_hypo_dmr_872|3|0.479|0.863	0	.
chr1	13869976	13870075	P39_cKOvsControl_cKO_hypo_dmr_873|3|0.189|0.529	0	.
chr1	13931084	13931798	P39_cKOvsControl_cKO_hypo_dmr_876|13|0.280|0.724	0	.
chr1	13934995	13936680	P39_cKOvsControl_cKO_hypo_dmr_877|25|0.219|0.660	0	.
chr1	13938863	13939148	P39_cKOvsControl_cKO_hypo_dmr_878|4|0.251|0.554	0	.
chr1	13980218	13980361	P39_cKOvsControl_cKO_hypo_dmr_880|6|0.467|0.835	0	.
chr1	13992081	13993286	P39_cKOvsControl_cKO_hypo_dmr_882|25|0.207|0.638	0	.
chr1	13997883	13998005	P39_cKOvsControl_cKO_hypo_dmr_883|3|0.142|0.452	0	.
chr1	14000666	14001081	P39_cKOvsControl_cKO_hypo_dmr_884|5|0.138|0.741	0	.
chr1	14001644	14001719	P39_cKOvsControl_cKO_hypo_dmr_885|5|0.281|0.924	0	.
chr1	14004707	14004887	P39_cKOvsControl_cKO_hypo_dmr_886|5|0.514|0.885	0	.
chr1	14009959	14010157	P39_cKOvsControl_cKO_hypo_dmr_888|6|0.167|0.749	0	.
chr1	14010928	14011841	P39_cKOvsControl_cKO_hypo_dmr_889|21|0.471|0.838	0	.
chr1	14015696	14016701	P39_cKOvsControl_cKO_hypo_dmr_890|7|0.451|0.784	0	.
chr1	14036244	14036289	P39_cKOvsControl_cKO_hypo_dmr_891|3|0.411|0.870	0	.
chr1	14096639	14097118	P39_cKOvsControl_cKO_hypo_dmr_892|5|0.323|0.833	0	.
chr1	14097679	14098095	P39_cKOvsControl_cKO_hypo_dmr_893|10|0.017|0.861	0	.
chr1	14099071	14099381	P39_cKOvsControl_cKO_hypo_dmr_894|10|0.150|0.935	0	.
chr1	14106466	14107291	P39_cKOvsControl_cKO_hypo_dmr_895|8|0.407|0.839	0	.
chr1	14108212	14109613	P39_cKOvsControl_cKO_hypo_dmr_896|23|0.096|0.471	0	.
chr1	14110368	14110560	P39_cKOvsControl_cKO_hypo_dmr_897|5|0.383|0.721	0	.
chr1	14122711	14122716	P39_cKOvsControl_cKO_hypo_dmr_899|3|0.615|0.921	0	.
chr1	14129273	14130192	P39_cKOvsControl_cKO_hypo_dmr_901|10|0.102|0.715	0	.
chr1	14136858	14137286	P39_cKOvsControl_cKO_hypo_dmr_902|6|0.530|0.902	0	.
chr1	14139735	14140639	P39_cKOvsControl_cKO_hypo_dmr_903|18|0.285|0.834	0	.
chr1	14143188	14143223	P39_cKOvsControl_cKO_hypo_dmr_904|3|0.204|0.547	0	.
chr1	14160248	14160378	P39_cKOvsControl_cKO_hypo_dmr_906|3|0.153|0.595	0	.
chr1	14161643	14162437	P39_cKOvsControl_cKO_hypo_dmr_907|16|0.389|0.819	0	.
chr1	14163578	14164354	P39_cKOvsControl_cKO_hypo_dmr_908|6|0.179|0.536	0	.
chr1	14166123	14167177	P39_cKOvsControl_cKO_hypo_dmr_909|16|0.259|0.783	0	.
chr1	14172997	14174295	P39_cKOvsControl_cKO_hypo_dmr_910|6|0.497|0.827	0	.
chr1	14176453	14176524	P39_cKOvsControl_cKO_hypo_dmr_911|3|0.440|0.788	0	.
chr1	14179148	14180486	P39_cKOvsControl_cKO_hypo_dmr_912|28|0.370|0.879	0	.
chr1	14181109	14182369	P39_cKOvsControl_cKO_hypo_dmr_913|21|0.234|0.734	0	.
chr1	14182967	14183276	P39_cKOvsControl_cKO_hypo_dmr_914|5|0.460|0.888	0	.
chr1	14184618	14186155	P39_cKOvsControl_cKO_hypo_dmr_915|36|0.081|0.594	0	.
chr1	14186687	14187225	P39_cKOvsControl_cKO_hypo_dmr_916|9|0.376|0.791	0	.
chr1	14189077	14190084	P39_cKOvsControl_cKO_hypo_dmr_917|18|0.312|0.772	0	.
chr1	14190753	14191685	P39_cKOvsControl_cKO_hypo_dmr_918|12|0.491|0.808	0	.
chr1	14192406	14193921	P39_cKOvsControl_cKO_hypo_dmr_919|37|0.303|0.847	0	.
chr1	14207545	14208342	P39_cKOvsControl_cKO_hypo_dmr_920|22|0.397|0.735	0	.
chr1	14218630	14220576	P39_cKOvsControl_cKO_hypo_dmr_922|19|0.463|0.830	0	.
chr1	14224495	14224561	P39_cKOvsControl_cKO_hypo_dmr_923|4|0.406|0.886	0	.
chr1	14225436	14226379	P39_cKOvsControl_cKO_hypo_dmr_924|7|0.117|0.634	0	.
chr1	14238824	14238864	P39_cKOvsControl_cKO_hypo_dmr_927|5|0.490|0.943	0	.
chr1	14244857	14245255	P39_cKOvsControl_cKO_hypo_dmr_929|10|0.180|0.841	0	.
chr1	14249664	14250165	P39_cKOvsControl_cKO_hypo_dmr_931|4|0.587|0.897	0	.
chr1	14253040	14253196	P39_cKOvsControl_cKO_hypo_dmr_932|6|0.595|0.935	0	.
chr1	14254002	14254254	P39_cKOvsControl_cKO_hypo_dmr_933|5|0.290|0.712	0	.
chr1	14254954	14255688	P39_cKOvsControl_cKO_hypo_dmr_934|13|0.253|0.761	0	.
chr1	14257101	14257486	P39_cKOvsControl_cKO_hypo_dmr_935|7|0.427|0.845	0	.
chr1	14268328	14269037	P39_cKOvsControl_cKO_hypo_dmr_939|14|0.593|0.900	0	.
chr1	14269863	14269985	P39_cKOvsControl_cKO_hypo_dmr_940|4|0.485|0.850	0	.
chr1	14274373	14274631	P39_cKOvsControl_cKO_hypo_dmr_941|5|0.262|0.754	0	.
chr1	14275224	14275773	P39_cKOvsControl_cKO_hypo_dmr_942|6|0.519|0.882	0	.
chr1	14285432	14286064	P39_cKOvsControl_cKO_hypo_dmr_944|5|0.356|0.736	0	.
chr1	14287335	14289056	P39_cKOvsControl_cKO_hypo_dmr_945|23|0.516|0.827	0	.
chr1	14290876	14293258	P39_cKOvsControl_cKO_hypo_dmr_946|19|0.349|0.774	0	.
chr1	14293859	14294764	P39_cKOvsControl_cKO_hypo_dmr_947|23|0.101|0.620	0	.
chr1	14297130	14298669	P39_cKOvsControl_cKO_hypo_dmr_948|16|0.438|0.767	0	.
chr1	14306538	14309473	P39_cKOvsControl_cKO_hypo_dmr_951|53|0.230|0.619	0	.
chr1	14310571	14312976	P39_cKOvsControl_cKO_hypo_dmr_952|29|0.436|0.777	0	.
chr1	14313805	14314117	P39_cKOvsControl_cKO_hypo_dmr_953|7|0.227|0.694	0	.
chr1	14350663	14350745	P39_cKOvsControl_cKO_hypo_dmr_956|3|0.338|0.781	0	.
chr1	14356229	14356711	P39_cKOvsControl_cKO_hypo_dmr_957|14|0.264|0.856	0	.
chr1	14369356	14371402	P39_cKOvsControl_cKO_hypo_dmr_959|27|0.465|0.853	0	.
chr1	14406695	14406748	P39_cKOvsControl_cKO_hypo_dmr_961|4|0.287|0.638	0	.
chr1	14413996	14414190	P39_cKOvsControl_cKO_hypo_dmr_962|8|0.267|0.809	0	.
chr1	14422497	14423356	P39_cKOvsControl_cKO_hypo_dmr_964|11|0.513|0.814	0	.
chr1	14429302	14429634	P39_cKOvsControl_cKO_hypo_dmr_966|4|0.157|0.777	0	.
chr1	14431898	14431975	P39_cKOvsControl_cKO_hypo_dmr_967|3|0.144|0.878	0	.
chr1	14456982	14457336	P39_cKOvsControl_cKO_hypo_dmr_968|3|0.154|0.765	0	.
chr1	14462625	14462852	P39_cKOvsControl_cKO_hypo_dmr_970|4|0.232|0.645	0	.
chr1	14464453	14465551	P39_cKOvsControl_cKO_hypo_dmr_971|12|0.317|0.813	0	.
chr1	14471742	14472848	P39_cKOvsControl_cKO_hypo_dmr_972|12|0.178|0.685	0	.
chr1	14474626	14475728	P39_cKOvsControl_cKO_hypo_dmr_973|10|0.489|0.831	0	.
chr1	14507560	14509685	P39_cKOvsControl_cKO_hypo_dmr_978|23|0.336|0.636	0	.
chr1	14510824	14511650	P39_cKOvsControl_cKO_hypo_dmr_979|10|0.441|0.814	0	.
chr1	14512458	14513425	P39_cKOvsControl_cKO_hypo_dmr_980|16|0.237|0.647	0	.
chr1	14543968	14544408	P39_cKOvsControl_cKO_hypo_dmr_981|7|0.342|0.760	0	.
chr1	14551512	14551672	P39_cKOvsControl_cKO_hypo_dmr_983|4|0.330|0.743	0	.
chr1	14552692	14553517	P39_cKOvsControl_cKO_hypo_dmr_984|7|0.264|0.627	0	.
chr1	14563401	14564452	P39_cKOvsControl_cKO_hypo_dmr_985|12|0.437|0.796	0	.
chr1	14565591	14567200	P39_cKOvsControl_cKO_hypo_dmr_986|26|0.384|0.857	0	.
chr1	14574220	14574697	P39_cKOvsControl_cKO_hypo_dmr_988|3|0.463|0.779	0	.
chr1	14579796	14580038	P39_cKOvsControl_cKO_hypo_dmr_989|4|0.511|0.898	0	.
chr1	14620640	14621980	P39_cKOvsControl_cKO_hypo_dmr_991|11|0.448|0.812	0	.
chr1	14623030	14623614	P39_cKOvsControl_cKO_hypo_dmr_992|5|0.388|0.724	0	.
chr1	14628939	14629045	P39_cKOvsControl_cKO_hypo_dmr_994|4|0.546|0.866	0	.
chr1	14631784	14632257	P39_cKOvsControl_cKO_hypo_dmr_996|7|0.433|0.806	0	.
chr1	14634352	14634625	P39_cKOvsControl_cKO_hypo_dmr_997|5|0.519|0.875	0	.
chr1	14639327	14639503	P39_cKOvsControl_cKO_hypo_dmr_999|5|0.492|0.870	0	.
chr1	14644315	14644511	P39_cKOvsControl_cKO_hypo_dmr_1001|3|0.530|0.885	0	.
chr1	14658912	14659366	P39_cKOvsControl_cKO_hypo_dmr_1002|4|0.369|0.745	0	.
chr1	14665165	14665327	P39_cKOvsControl_cKO_hypo_dmr_1004|3|0.337|0.771	0	.
chr1	14674072	14674099	P39_cKOvsControl_cKO_hypo_dmr_1007|4|0.409|0.875	0	.
chr1	14692625	14692728	P39_cKOvsControl_cKO_hypo_dmr_1011|4|0.597|0.906	0	.
chr1	14708151	14708814	P39_cKOvsControl_cKO_hypo_dmr_1014|13|0.435|0.861	0	.
chr1	14710249	14710478	P39_cKOvsControl_cKO_hypo_dmr_1015|9|0.229|0.576	0	.
chr1	14717829	14717909	P39_cKOvsControl_cKO_hypo_dmr_1019|4|0.388|0.726	0	.
chr1	14745623	14747694	P39_cKOvsControl_cKO_hypo_dmr_1021|13|0.541|0.842	0	.
chr1	14754204	14754845	P39_cKOvsControl_cKO_hypo_dmr_1024|15|0.555|0.865	0	.
chr1	14756727	14757967	P39_cKOvsControl_cKO_hypo_dmr_1025|19|0.058|0.398	0	.
chr1	14761811	14761971	P39_cKOvsControl_cKO_hypo_dmr_1026|3|0.513|0.824	0	.
chr1	14769787	14770462	P39_cKOvsControl_cKO_hypo_dmr_1028|10|0.543|0.862	0	.
chr1	14775079	14775356	P39_cKOvsControl_cKO_hypo_dmr_1030|5|0.403|0.746	0	.
chr1	14800075	14800536	P39_cKOvsControl_cKO_hypo_dmr_1034|3|0.319|0.714	0	.
chr1	14825068	14825117	P39_cKOvsControl_cKO_hypo_dmr_1036|4|0.409|0.849	0	.
chr1	14889648	14889725	P39_cKOvsControl_cKO_hypo_dmr_1042|4|0.322|0.743	0	.
chr1	14903298	14903399	P39_cKOvsControl_cKO_hypo_dmr_1044|8|0.333|0.831	0	.
chr1	14905958	14905975	P39_cKOvsControl_cKO_hypo_dmr_1045|3|0.474|0.777	0	.
chr1	14908901	14909728	P39_cKOvsControl_cKO_hypo_dmr_1046|8|0.269|0.867	0	.
chr1	14915785	14917067	P39_cKOvsControl_cKO_hypo_dmr_1047|8|0.219|0.602	0	.
chr1	14920540	14920987	P39_cKOvsControl_cKO_hypo_dmr_1048|8|0.310|0.822	0	.
chr1	15017756	15017938	P39_cKOvsControl_cKO_hypo_dmr_1055|3|0.360|0.811	0	.
chr1	15053280	15054125	P39_cKOvsControl_cKO_hypo_dmr_1056|11|0.191|0.615	0	.
chr1	15129040	15129443	P39_cKOvsControl_cKO_hypo_dmr_1058|12|0.035|0.763	0	.
chr1	15132094	15132652	P39_cKOvsControl_cKO_hypo_dmr_1059|4|0.447|0.818	0	.
chr1	15148142	15148453	P39_cKOvsControl_cKO_hypo_dmr_1060|3|0.540|0.896	0	.
chr1	15184511	15184565	P39_cKOvsControl_cKO_hypo_dmr_1062|3|0.326|0.762	0	.
chr1	15283585	15284154	P39_cKOvsControl_cKO_hypo_dmr_1064|7|0.413|0.738	0	.
chr1	15299625	15300349	P39_cKOvsControl_cKO_hypo_dmr_1066|8|0.499|0.823	0	.
chr1	15316608	15316623	P39_cKOvsControl_cKO_hypo_dmr_1069|3|0.482|0.791	0	.
chr1	15318893	15319726	P39_cKOvsControl_cKO_hypo_dmr_1070|7|0.492|0.815	0	.
chr1	15328328	15328472	P39_cKOvsControl_cKO_hypo_dmr_1073|4|0.231|0.644	0	.
chr1	15332586	15333058	P39_cKOvsControl_cKO_hypo_dmr_1075|6|0.457|0.842	0	.
chr1	15334065	15334074	P39_cKOvsControl_cKO_hypo_dmr_1076|4|0.028|0.414	0	.
chr1	15337137	15337535	P39_cKOvsControl_cKO_hypo_dmr_1077|5|0.389|0.767	0	.
chr1	15383685	15383932	P39_cKOvsControl_cKO_hypo_dmr_1080|5|0.135|0.641	0	.
chr1	15407486	15407566	P39_cKOvsControl_cKO_hypo_dmr_1082|5|0.205|0.702	0	.
chr1	15434949	15435299	P39_cKOvsControl_cKO_hypo_dmr_1087|6|0.374|0.705	0	.
chr1	15440810	15440939	P39_cKOvsControl_cKO_hypo_dmr_1088|4|0.159|0.734	0	.
chr1	15451384	15451662	P39_cKOvsControl_cKO_hypo_dmr_1090|7|0.489|0.870	0	.
chr1	15540126	15540272	P39_cKOvsControl_cKO_hypo_dmr_1093|3|0.547|0.872	0	.
chr1	15565732	15566313	P39_cKOvsControl_cKO_hypo_dmr_1097|6|0.429|0.784	0	.
chr1	15568532	15569128	P39_cKOvsControl_cKO_hypo_dmr_1098|9|0.130|0.582	0	.
chr1	15578555	15578601	P39_cKOvsControl_cKO_hypo_dmr_1099|8|0.026|0.534	0	.
chr1	15582226	15582495	P39_cKOvsControl_cKO_hypo_dmr_1100|5|0.263|0.655	0	.
chr1	15592795	15592932	P39_cKOvsControl_cKO_hypo_dmr_1102|6|0.345|0.869	0	.
chr1	15602824	15603775	P39_cKOvsControl_cKO_hypo_dmr_1104|7|0.458|0.766	0	.
chr1	15604853	15604857	P39_cKOvsControl_cKO_hypo_dmr_1105|4|0.388|0.811	0	.
chr1	15609684	15609876	P39_cKOvsControl_cKO_hypo_dmr_1106|5|0.097|0.582	0	.
chr1	15617225	15617253	P39_cKOvsControl_cKO_hypo_dmr_1108|3|0.189|0.642	0	.
chr1	15622482	15622953	P39_cKOvsControl_cKO_hypo_dmr_1109|4|0.503|0.840	0	.
chr1	15624326	15624573	P39_cKOvsControl_cKO_hypo_dmr_1110|3|0.183|0.503	0	.
chr1	15631556	15632446	P39_cKOvsControl_cKO_hypo_dmr_1111|7|0.336|0.646	0	.
chr1	15632998	15633289	P39_cKOvsControl_cKO_hypo_dmr_1112|6|0.294|0.814	0	.
chr1	15635035	15635313	P39_cKOvsControl_cKO_hypo_dmr_1113|7|0.216|0.596	0	.
chr1	15636270	15637662	P39_cKOvsControl_cKO_hypo_dmr_1114|12|0.231|0.696	0	.
chr1	15638280	15638433	P39_cKOvsControl_cKO_hypo_dmr_1115|3|0.268|0.726	0	.
chr1	15648053	15648085	P39_cKOvsControl_cKO_hypo_dmr_1117|4|0.323|0.748	0	.
chr1	15649867	15650235	P39_cKOvsControl_cKO_hypo_dmr_1118|4|0.231|0.573	0	.
chr1	15651726	15653383	P39_cKOvsControl_cKO_hypo_dmr_1119|28|0.175|0.536	0	.
chr1	15668968	15669420	P39_cKOvsControl_cKO_hypo_dmr_1124|3|0.446|0.843	0	.
chr1	15680716	15681111	P39_cKOvsControl_cKO_hypo_dmr_1127|4|0.516|0.884	0	.
chr1	15713028	15713143	P39_cKOvsControl_cKO_hypo_dmr_1131|3|0.531|0.865	0	.
chr1	15720694	15720842	P39_cKOvsControl_cKO_hypo_dmr_1132|3|0.197|0.501	0	.
chr1	15768539	15769055	P39_cKOvsControl_cKO_hypo_dmr_1133|11|0.195|0.854	0	.
chr1	15776319	15776342	P39_cKOvsControl_cKO_hypo_dmr_1134|4|0.095|0.524	0	.
chr1	15875644	15875748	P39_cKOvsControl_cKO_hypo_dmr_1138|4|0.379|0.802	0	.
chr1	15880573	15881023	P39_cKOvsControl_cKO_hypo_dmr_1140|4|0.454|0.763	0	.
chr1	15884740	15885418	P39_cKOvsControl_cKO_hypo_dmr_1142|7|0.546|0.883	0	.
chr1	15886188	15886462	P39_cKOvsControl_cKO_hypo_dmr_1143|3|0.431|0.765	0	.
chr1	15894286	15894315	P39_cKOvsControl_cKO_hypo_dmr_1146|3|0.473|0.886	0	.
chr1	15894942	15895074	P39_cKOvsControl_cKO_hypo_dmr_1147|8|0.538|0.849	0	.
chr1	15908807	15909143	P39_cKOvsControl_cKO_hypo_dmr_1151|5|0.171|0.820	0	.
chr1	15913463	15914212	P39_cKOvsControl_cKO_hypo_dmr_1154|7|0.537|0.839	0	.
chr1	15925798	15926508	P39_cKOvsControl_cKO_hypo_dmr_1155|12|0.420|0.942	0	.
chr1	15992582	15993168	P39_cKOvsControl_cKO_hypo_dmr_1156|7|0.409|0.753	0	.
chr1	15994129	15994801	P39_cKOvsControl_cKO_hypo_dmr_1157|7|0.559|0.862	0	.
chr1	16008995	16009066	P39_cKOvsControl_cKO_hypo_dmr_1159|3|0.482|0.900	0	.
chr1	16043476	16043567	P39_cKOvsControl_cKO_hypo_dmr_1160|3|0.445|0.844	0	.
chr1	16056753	16057853	P39_cKOvsControl_cKO_hypo_dmr_1161|7|0.467|0.769	0	.
chr1	16058491	16058908	P39_cKOvsControl_cKO_hypo_dmr_1162|10|0.143|0.604	0	.
chr1	16069606	16070366	P39_cKOvsControl_cKO_hypo_dmr_1163|10|0.335|0.722	0	.
chr1	16078586	16079365	P39_cKOvsControl_cKO_hypo_dmr_1164|16|0.411|0.735	0	.
chr1	16094515	16094733	P39_cKOvsControl_cKO_hypo_dmr_1167|6|0.317|0.767	0	.
chr1	16112416	16112627	P39_cKOvsControl_cKO_hypo_dmr_1168|5|0.363|0.750	0	.
chr1	16114986	16115221	P39_cKOvsControl_cKO_hypo_dmr_1169|5|0.467|0.829	0	.
chr1	16115799	16116569	P39_cKOvsControl_cKO_hypo_dmr_1170|14|0.305|0.657	0	.
chr1	16122960	16123271	P39_cKOvsControl_cKO_hypo_dmr_1172|4|0.380|0.797	0	.
chr1	16124212	16124459	P39_cKOvsControl_cKO_hypo_dmr_1173|3|0.399|0.806	0	.
chr1	16127148	16127232	P39_cKOvsControl_cKO_hypo_dmr_1174|4|0.522|0.864	0	.
chr1	16127759	16128638	P39_cKOvsControl_cKO_hypo_dmr_1175|23|0.500|0.870	0	.
chr1	16131438	16132539	P39_cKOvsControl_cKO_hypo_dmr_1177|21|0.483|0.867	0	.
chr1	16173005	16173128	P39_cKOvsControl_cKO_hypo_dmr_1180|4|0.250|0.748	0	.
chr1	16178879	16180124	P39_cKOvsControl_cKO_hypo_dmr_1183|9|0.255|0.631	0	.
chr1	16184103	16184574	P39_cKOvsControl_cKO_hypo_dmr_1184|8|0.376|0.850	0	.
chr1	16185950	16187158	P39_cKOvsControl_cKO_hypo_dmr_1185|13|0.358|0.764	0	.
chr1	16191385	16191767	P39_cKOvsControl_cKO_hypo_dmr_1187|3|0.239|0.702	0	.
chr1	16202354	16203333	P39_cKOvsControl_cKO_hypo_dmr_1189|9|0.253|0.561	0	.
chr1	16205066	16205376	P39_cKOvsControl_cKO_hypo_dmr_1190|5|0.483|0.873	0	.
chr1	16213671	16213785	P39_cKOvsControl_cKO_hypo_dmr_1193|5|0.560|0.935	0	.
chr1	16227695	16227715	P39_cKOvsControl_cKO_hypo_dmr_1194|4|0.263|0.692	0	.
chr1	16229424	16229937	P39_cKOvsControl_cKO_hypo_dmr_1195|11|0.369|0.695	0	.
chr1	16231218	16231661	P39_cKOvsControl_cKO_hypo_dmr_1196|4|0.456|0.769	0	.
chr1	16236329	16236802	P39_cKOvsControl_cKO_hypo_dmr_1198|7|0.208|0.608	0	.
chr1	16248628	16250748	P39_cKOvsControl_cKO_hypo_dmr_1200|28|0.259|0.622	0	.
chr1	16251769	16252045	P39_cKOvsControl_cKO_hypo_dmr_1201|5|0.371|0.702	0	.
chr1	16253493	16253961	P39_cKOvsControl_cKO_hypo_dmr_1202|3|0.171|0.516	0	.
chr1	16261188	16261205	P39_cKOvsControl_cKO_hypo_dmr_1204|3|0.291|0.617	0	.
chr1	16265054	16266269	P39_cKOvsControl_cKO_hypo_dmr_1206|10|0.387|0.803	0	.
chr1	16267798	16268834	P39_cKOvsControl_cKO_hypo_dmr_1207|8|0.182|0.543	0	.
chr1	16279412	16279869	P39_cKOvsControl_cKO_hypo_dmr_1210|7|0.446|0.798	0	.
chr1	16293300	16296865	P39_cKOvsControl_cKO_hypo_dmr_1212|51|0.201|0.583	0	.
chr1	16297421	16297794	P39_cKOvsControl_cKO_hypo_dmr_1213|3|0.502|0.810	0	.
chr1	16300140	16300960	P39_cKOvsControl_cKO_hypo_dmr_1214|5|0.297|0.651	0	.
chr1	16301835	16303099	P39_cKOvsControl_cKO_hypo_dmr_1215|15|0.129|0.544	0	.
chr1	16304923	16305160	P39_cKOvsControl_cKO_hypo_dmr_1216|5|0.350|0.709	0	.
chr1	16305768	16305986	P39_cKOvsControl_cKO_hypo_dmr_1217|3|0.492|0.863	0	.
chr1	16308594	16309362	P39_cKOvsControl_cKO_hypo_dmr_1218|5|0.267|0.680	0	.
chr1	16361716	16361874	P39_cKOvsControl_cKO_hypo_dmr_1220|5|0.460|0.805	0	.
chr1	16367665	16368441	P39_cKOvsControl_cKO_hypo_dmr_1221|12|0.554|0.876	0	.
chr1	16391950	16392005	P39_cKOvsControl_cKO_hypo_dmr_1224|3|0.392|0.778	0	.
chr1	16406630	16406957	P39_cKOvsControl_cKO_hypo_dmr_1225|6|0.331|0.648	0	.
chr1	16441788	16441922	P39_cKOvsControl_cKO_hypo_dmr_1227|4|0.268|0.637	0	.
chr1	16465605	16465741	P39_cKOvsControl_cKO_hypo_dmr_1228|4|0.117|0.429	0	.
chr1	16466388	16466802	P39_cKOvsControl_cKO_hypo_dmr_1229|6|0.343|0.725	0	.
chr1	16483289	16483865	P39_cKOvsControl_cKO_hypo_dmr_1231|8|0.363|0.731	0	.
chr1	16520710	16521194	P39_cKOvsControl_cKO_hypo_dmr_1233|14|0.260|0.738	0	.
chr1	16536650	16536763	P39_cKOvsControl_cKO_hypo_dmr_1234|3|0.297|0.716	0	.
chr1	16779632	16779951	P39_cKOvsControl_cKO_hypo_dmr_1240|3|0.265|0.812	0	.
chr1	16780750	16780977	P39_cKOvsControl_cKO_hypo_dmr_1241|3|0.226|0.657	0	.
chr1	16793747	16793853	P39_cKOvsControl_cKO_hypo_dmr_1242|5|0.291|0.706	0	.
chr1	16798653	16798801	P39_cKOvsControl_cKO_hypo_dmr_1243|3|0.338|0.699	0	.
chr1	16821849	16821915	P39_cKOvsControl_cKO_hypo_dmr_1245|4|0.281|0.807	0	.
chr1	16824148	16825176	P39_cKOvsControl_cKO_hypo_dmr_1246|29|0.126|0.760	0	.
chr1	16878737	16878900	P39_cKOvsControl_cKO_hypo_dmr_1248|7|0.470|0.867	0	.
chr1	16930104	16930892	P39_cKOvsControl_cKO_hypo_dmr_1249|6|0.138|0.515	0	.
chr1	16938483	16938650	P39_cKOvsControl_cKO_hypo_dmr_1250|5|0.226|0.747	0	.
chr1	16940403	16940565	P39_cKOvsControl_cKO_hypo_dmr_1251|6|0.233|0.685	0	.
chr1	16957195	16957272	P39_cKOvsControl_cKO_hypo_dmr_1252|4|0.238|0.596	0	.
chr1	16975678	16975732	P39_cKOvsControl_cKO_hypo_dmr_1253|4|0.248|0.684	0	.
chr1	17009240	17009532	P39_cKOvsControl_cKO_hypo_dmr_1254|3|0.257|0.572	0	.
chr1	17061006	17061061	P39_cKOvsControl_cKO_hypo_dmr_1256|3|0.182|0.599	0	.
chr1	17099037	17100324	P39_cKOvsControl_cKO_hypo_dmr_1257|10|0.451|0.793	0	.
chr1	17102530	17102715	P39_cKOvsControl_cKO_hypo_dmr_1258|3|0.318|0.696	0	.
chr1	17116345	17117258	P39_cKOvsControl_cKO_hypo_dmr_1259|11|0.136|0.605	0	.
chr1	17126280	17126509	P39_cKOvsControl_cKO_hypo_dmr_1261|3|0.414|0.768	0	.
chr1	17157007	17157131	P39_cKOvsControl_cKO_hypo_dmr_1262|5|0.468|0.805	0	.
chr1	17207512	17207558	P39_cKOvsControl_cKO_hypo_dmr_1265|3|0.202|0.709	0	.
chr1	17303610	17303753	P39_cKOvsControl_cKO_hypo_dmr_1267|3|0.377|0.757	0	.
chr1	17308018	17308036	P39_cKOvsControl_cKO_hypo_dmr_1268|3|0.526|0.901	0	.
chr1	17308888	17308967	P39_cKOvsControl_cKO_hypo_dmr_1269|4|0.224|0.842	0	.
chr1	17309761	17309780	P39_cKOvsControl_cKO_hypo_dmr_1270|4|0.154|0.741	0	.
chr1	17314698	17314826	P39_cKOvsControl_cKO_hypo_dmr_1272|3|0.166|0.533	0	.
chr1	17317268	17317515	P39_cKOvsControl_cKO_hypo_dmr_1273|3|0.387|0.819	0	.
chr1	17377783	17378118	P39_cKOvsControl_cKO_hypo_dmr_1275|4|0.177|0.493	0	.
chr1	17380013	17380269	P39_cKOvsControl_cKO_hypo_dmr_1276|4|0.369|0.701	0	.
chr1	17416036	17416884	P39_cKOvsControl_cKO_hypo_dmr_1277|12|0.284|0.707	0	.
chr1	17489710	17489838	P39_cKOvsControl_cKO_hypo_dmr_1278|10|0.451|0.890	0	.
chr1	17601999	17602738	P39_cKOvsControl_cKO_hypo_dmr_1280|7|0.367|0.687	0	.
chr1	17603633	17604155	P39_cKOvsControl_cKO_hypo_dmr_1281|6|0.519|0.819	0	.
chr1	17627980	17628043	P39_cKOvsControl_cKO_hypo_dmr_1283|4|0.145|0.495	0	.
chr1	17640402	17640716	P39_cKOvsControl_cKO_hypo_dmr_1285|6|0.447|0.822	0	.
chr1	17655579	17655991	P39_cKOvsControl_cKO_hypo_dmr_1286|3|0.204|0.724	0	.
chr1	17657650	17657678	P39_cKOvsControl_cKO_hypo_dmr_1287|4|0.071|0.713	0	.
chr1	17663362	17663763	P39_cKOvsControl_cKO_hypo_dmr_1288|5|0.518|0.893	0	.
chr1	17671836	17671998	P39_cKOvsControl_cKO_hypo_dmr_1290|5|0.138|0.477	0	.
chr1	17686580	17688149	P39_cKOvsControl_cKO_hypo_dmr_1291|10|0.376|0.793	0	.
chr1	17726848	17727079	P39_cKOvsControl_cKO_hypo_dmr_1293|3|0.206|0.605	0	.
chr1	17758464	17759051	P39_cKOvsControl_cKO_hypo_dmr_1296|4|0.365|0.749	0	.
chr1	17771019	17771240	P39_cKOvsControl_cKO_hypo_dmr_1301|8|0.278|0.681	0	.
chr1	17791341	17791434	P39_cKOvsControl_cKO_hypo_dmr_1302|3|0.511|0.855	0	.
chr1	17816027	17816076	P39_cKOvsControl_cKO_hypo_dmr_1303|3|0.433|0.820	0	.
chr1	17827306	17827579	P39_cKOvsControl_cKO_hypo_dmr_1304|7|0.362|0.894	0	.
chr1	17932230	17932463	P39_cKOvsControl_cKO_hypo_dmr_1306|4|0.418|0.800	0	.
chr1	17966596	17966649	P39_cKOvsControl_cKO_hypo_dmr_1307|5|0.256|0.749	0	.
chr1	17979944	17980005	P39_cKOvsControl_cKO_hypo_dmr_1308|3|0.570|0.952	0	.
chr1	17981933	17982253	P39_cKOvsControl_cKO_hypo_dmr_1309|3|0.570|0.919	0	.
chr1	17985166	17985363	P39_cKOvsControl_cKO_hypo_dmr_1310|3|0.377|0.767	0	.
chr1	17993840	17994064	P39_cKOvsControl_cKO_hypo_dmr_1311|5|0.179|0.545	0	.
chr1	18026323	18026501	P39_cKOvsControl_cKO_hypo_dmr_1314|6|0.176|0.812	0	.
chr1	18029162	18029397	P39_cKOvsControl_cKO_hypo_dmr_1315|5|0.374|0.889	0	.
chr1	18050808	18050900	P39_cKOvsControl_cKO_hypo_dmr_1316|4|0.532|0.878	0	.
chr1	18054137	18054350	P39_cKOvsControl_cKO_hypo_dmr_1317|3|0.101|0.589	0	.
chr1	18056591	18057139	P39_cKOvsControl_cKO_hypo_dmr_1318|7|0.352|0.731	0	.
chr1	18059565	18059675	P39_cKOvsControl_cKO_hypo_dmr_1319|3|0.551|0.893	0	.
chr1	18122847	18122870	P39_cKOvsControl_cKO_hypo_dmr_1320|3|0.283|0.685	0	.
chr1	18145646	18146097	P39_cKOvsControl_cKO_hypo_dmr_1323|7|0.249|0.655	0	.
chr1	18160120	18160178	P39_cKOvsControl_cKO_hypo_dmr_1324|4|0.362|0.821	0	.
chr1	18170617	18170760	P39_cKOvsControl_cKO_hypo_dmr_1325|3|0.117|0.438	0	.
chr1	18191806	18192358	P39_cKOvsControl_cKO_hypo_dmr_1327|12|0.107|0.530	0	.
chr1	18203319	18203733	P39_cKOvsControl_cKO_hypo_dmr_1328|3|0.155|0.528	0	.
chr1	18223731	18223771	P39_cKOvsControl_cKO_hypo_dmr_1329|3|0.624|0.930	0	.
chr1	18268677	18269107	P39_cKOvsControl_cKO_hypo_dmr_1332|10|0.391|0.796	0	.
chr1	18271445	18271474	P39_cKOvsControl_cKO_hypo_dmr_1333|3|0.404|0.925	0	.
chr1	18292437	18292746	P39_cKOvsControl_cKO_hypo_dmr_1334|9|0.002|0.430	0	.
chr1	18294989	18295661	P39_cKOvsControl_cKO_hypo_dmr_1335|8|0.282|0.607	0	.
chr1	18302699	18303257	P39_cKOvsControl_cKO_hypo_dmr_1336|6|0.485|0.793	0	.
chr1	18307349	18308877	P39_cKOvsControl_cKO_hypo_dmr_1337|23|0.026|0.339	0	.
chr1	18313245	18313785	P39_cKOvsControl_cKO_hypo_dmr_1338|8|0.303|0.786	0	.
chr1	18315567	18315618	P39_cKOvsControl_cKO_hypo_dmr_1340|3|0.319|0.730	0	.
chr1	18318017	18318099	P39_cKOvsControl_cKO_hypo_dmr_1341|3|0.121|0.720	0	.
chr1	18350937	18351297	P39_cKOvsControl_cKO_hypo_dmr_1343|5|0.329|0.749	0	.
chr1	18354004	18354183	P39_cKOvsControl_cKO_hypo_dmr_1344|3|0.269|0.609	0	.
chr1	18381745	18382261	P39_cKOvsControl_cKO_hypo_dmr_1348|3|0.484|0.790	0	.
chr1	18386409	18387208	P39_cKOvsControl_cKO_hypo_dmr_1350|10|0.136|0.684	0	.
chr1	18415666	18416795	P39_cKOvsControl_cKO_hypo_dmr_1353|16|0.076|0.647	0	.
chr1	18453304	18453384	P39_cKOvsControl_cKO_hypo_dmr_1355|3|0.450|0.881	0	.
chr1	18457466	18458007	P39_cKOvsControl_cKO_hypo_dmr_1356|4|0.417|0.737	0	.
chr1	18462079	18462364	P39_cKOvsControl_cKO_hypo_dmr_1357|8|0.332|0.810	0	.
chr1	18463527	18465985	P39_cKOvsControl_cKO_hypo_dmr_1358|25|0.192|0.676	0	.
chr1	18512375	18513357	P39_cKOvsControl_cKO_hypo_dmr_1362|18|0.234|0.675	0	.
chr1	18567242	18567371	P39_cKOvsControl_cKO_hypo_dmr_1365|4|0.185|0.656	0	.
chr1	18588531	18589074	P39_cKOvsControl_cKO_hypo_dmr_1367|6|0.293|0.622	0	.
chr1	18598860	18599424	P39_cKOvsControl_cKO_hypo_dmr_1368|12|0.016|0.588	0	.
chr1	18600287	18600411	P39_cKOvsControl_cKO_hypo_dmr_1369|6|0.228|0.729	0	.
chr1	18607561	18607594	P39_cKOvsControl_cKO_hypo_dmr_1370|4|0.301|0.716	0	.
chr1	18612776	18612994	P39_cKOvsControl_cKO_hypo_dmr_1372|4|0.163|0.590	0	.
chr1	18620071	18620335	P39_cKOvsControl_cKO_hypo_dmr_1373|3|0.299|0.754	0	.
chr1	18638997	18640016	P39_cKOvsControl_cKO_hypo_dmr_1375|17|0.096|0.672	0	.
chr1	18752672	18753367	P39_cKOvsControl_cKO_hypo_dmr_1376|8|0.248|0.708	0	.
chr1	18755442	18755834	P39_cKOvsControl_cKO_hypo_dmr_1377|9|0.066|0.514	0	.
chr1	18758992	18759137	P39_cKOvsControl_cKO_hypo_dmr_1378|4|0.164|0.603	0	.
chr1	18763357	18763386	P39_cKOvsControl_cKO_hypo_dmr_1379|3|0.295|0.664	0	.
chr1	18767548	18767860	P39_cKOvsControl_cKO_hypo_dmr_1381|9|0.015|0.456	0	.
chr1	18791361	18791520	P39_cKOvsControl_cKO_hypo_dmr_1382|3|0.165|0.664	0	.
chr1	18846679	18846772	P39_cKOvsControl_cKO_hypo_dmr_1383|4|0.398|0.841	0	.
chr1	18848645	18849455	P39_cKOvsControl_cKO_hypo_dmr_1384|12|0.272|0.673	0	.
chr1	18904092	18904433	P39_cKOvsControl_cKO_hypo_dmr_1387|4|0.312|0.649	0	.
chr1	18909939	18910528	P39_cKOvsControl_cKO_hypo_dmr_1388|7|0.318|0.692	0	.
chr1	18923060	18923199	P39_cKOvsControl_cKO_hypo_dmr_1390|4|0.195|0.516	0	.
chr1	18956856	18957631	P39_cKOvsControl_cKO_hypo_dmr_1392|6|0.332|0.648	0	.
chr1	18975362	18976163	P39_cKOvsControl_cKO_hypo_dmr_1394|11|0.161|0.506	0	.
chr1	18978999	18979808	P39_cKOvsControl_cKO_hypo_dmr_1396|13|0.396|0.750	0	.
chr1	18981106	18981451	P39_cKOvsControl_cKO_hypo_dmr_1397|9|0.494|0.862	0	.
chr1	18982733	18983214	P39_cKOvsControl_cKO_hypo_dmr_1398|5|0.350|0.688	0	.
chr1	19081363	19081479	P39_cKOvsControl_cKO_hypo_dmr_1401|5|0.426|0.841	0	.
chr1	19087585	19088796	P39_cKOvsControl_cKO_hypo_dmr_1402|20|0.336|0.647	0	.
chr1	19096196	19096841	P39_cKOvsControl_cKO_hypo_dmr_1404|19|0.104|0.560	0	.
chr1	19100541	19100809	P39_cKOvsControl_cKO_hypo_dmr_1406|4|0.026|0.343	0	.
chr1	19112955	19113574	P39_cKOvsControl_cKO_hypo_dmr_1407|12|0.207|0.518	0	.
chr1	19115791	19116168	P39_cKOvsControl_cKO_hypo_dmr_1409|3|0.253|0.803	0	.
chr1	19116786	19117243	P39_cKOvsControl_cKO_hypo_dmr_1410|8|0.477|0.820	0	.
chr1	19150698	19151258	P39_cKOvsControl_cKO_hypo_dmr_1414|6|0.396|0.750	0	.
chr1	19156442	19156771	P39_cKOvsControl_cKO_hypo_dmr_1415|3|0.382|0.738	0	.
chr1	19244649	19245361	P39_cKOvsControl_cKO_hypo_dmr_1418|13|0.028|0.638	0	.
chr1	19246975	19247057	P39_cKOvsControl_cKO_hypo_dmr_1419|3|0.388|0.828	0	.
chr1	19250877	19251518	P39_cKOvsControl_cKO_hypo_dmr_1420|9|0.396|0.810	0	.
chr1	19253459	19253552	P39_cKOvsControl_cKO_hypo_dmr_1421|3|0.581|0.894	0	.
chr1	19290607	19291763	P39_cKOvsControl_cKO_hypo_dmr_1422|10|0.235|0.627	0	.
chr1	19303991	19304057	P39_cKOvsControl_cKO_hypo_dmr_1424|3|0.305|0.916	0	.
chr1	19337055	19337531	P39_cKOvsControl_cKO_hypo_dmr_1425|8|0.243|0.712	0	.
chr1	19350401	19350817	P39_cKOvsControl_cKO_hypo_dmr_1426|10|0.106|0.763	0	.
chr1	19389753	19389823	P39_cKOvsControl_cKO_hypo_dmr_1427|5|0.285|0.700	0	.
chr1	19412187	19412645	P39_cKOvsControl_cKO_hypo_dmr_1428|7|0.137|0.626	0	.
chr1	19425735	19426129	P39_cKOvsControl_cKO_hypo_dmr_1429|3|0.467|0.825	0	.
chr1	19473529	19473965	P39_cKOvsControl_cKO_hypo_dmr_1432|4|0.223|0.693	0	.
chr1	19535199	19535288	P39_cKOvsControl_cKO_hypo_dmr_1434|3|0.446|0.838	0	.
chr1	19582268	19584228	P39_cKOvsControl_cKO_hypo_dmr_1437|26|0.304|0.673	0	.
chr1	19595429	19595776	P39_cKOvsControl_cKO_hypo_dmr_1438|5|0.316|0.680	0	.
chr1	19618589	19618618	P39_cKOvsControl_cKO_hypo_dmr_1440|3|0.239|0.640	0	.
chr1	19620642	19621259	P39_cKOvsControl_cKO_hypo_dmr_1441|7|0.163|0.565	0	.
chr1	19639203	19639544	P39_cKOvsControl_cKO_hypo_dmr_1442|13|0.411|0.803	0	.
chr1	19672615	19674647	P39_cKOvsControl_cKO_hypo_dmr_1443|26|0.212|0.624	0	.
chr1	19681355	19682023	P39_cKOvsControl_cKO_hypo_dmr_1444|13|0.420|0.791	0	.
chr1	19696227	19696436	P39_cKOvsControl_cKO_hypo_dmr_1445|3|0.392|0.727	0	.
chr1	19699422	19700111	P39_cKOvsControl_cKO_hypo_dmr_1446|18|0.052|0.629	0	.
chr1	19700649	19701022	P39_cKOvsControl_cKO_hypo_dmr_1447|3|0.496|0.798	0	.
chr1	19735380	19735431	P39_cKOvsControl_cKO_hypo_dmr_1448|5|0.156|0.664	0	.
chr1	19741227	19741505	P39_cKOvsControl_cKO_hypo_dmr_1449|6|0.457|0.833	0	.
chr1	19758082	19758311	P39_cKOvsControl_cKO_hypo_dmr_1450|5|0.006|0.369	0	.
chr1	19767315	19768634	P39_cKOvsControl_cKO_hypo_dmr_1451|22|0.291|0.779	0	.
chr1	19774890	19775115	P39_cKOvsControl_cKO_hypo_dmr_1452|4|0.291|0.706	0	.
chr1	19826588	19827213	P39_cKOvsControl_cKO_hypo_dmr_1453|14|0.405|0.745	0	.
chr1	19862597	19863180	P39_cKOvsControl_cKO_hypo_dmr_1456|3|0.270|0.610	0	.
chr1	19863948	19864002	P39_cKOvsControl_cKO_hypo_dmr_1457|3|0.324|0.805	0	.
chr1	19868273	19869032	P39_cKOvsControl_cKO_hypo_dmr_1458|30|0.069|0.616	0	.
chr1	19870019	19870300	P39_cKOvsControl_cKO_hypo_dmr_1459|10|0.264|0.659	0	.
chr1	19879980	19880193	P39_cKOvsControl_cKO_hypo_dmr_1460|5|0.288|0.705	0	.
chr1	19880928	19881657	P39_cKOvsControl_cKO_hypo_dmr_1461|14|0.251|0.562	0	.
chr1	19898768	19901238	P39_cKOvsControl_cKO_hypo_dmr_1463|45|0.425|0.863	0	.
chr1	19927765	19928421	P39_cKOvsControl_cKO_hypo_dmr_1467|10|0.052|0.580	0	.
chr1	19964801	19964837	P39_cKOvsControl_cKO_hypo_dmr_1471|3|0.446|0.872	0	.
chr1	19973386	19974035	P39_cKOvsControl_cKO_hypo_dmr_1473|12|0.089|0.522	0	.
chr1	19974605	19974682	P39_cKOvsControl_cKO_hypo_dmr_1474|3|0.000|0.379	0	.
chr1	19981563	19982262	P39_cKOvsControl_cKO_hypo_dmr_1476|9|0.151|0.659	0	.
chr1	19982868	19984722	P39_cKOvsControl_cKO_hypo_dmr_1477|26|0.172|0.783	0	.
chr1	19985278	19985307	P39_cKOvsControl_cKO_hypo_dmr_1478|3|0.570|0.912	0	.
chr1	20017597	20018561	P39_cKOvsControl_cKO_hypo_dmr_1481|19|0.248|0.711	0	.
chr1	20037459	20037826	P39_cKOvsControl_cKO_hypo_dmr_1483|6|0.352|0.725	0	.
chr1	20038897	20039896	P39_cKOvsControl_cKO_hypo_dmr_1484|12|0.185|0.566	0	.
chr1	20051288	20051321	P39_cKOvsControl_cKO_hypo_dmr_1485|3|0.537|0.894	0	.
chr1	20058448	20058470	P39_cKOvsControl_cKO_hypo_dmr_1486|3|0.247|0.812	0	.
chr1	20131703	20131926	P39_cKOvsControl_cKO_hypo_dmr_1491|8|0.254|0.827	0	.
chr1	20135036	20135456	P39_cKOvsControl_cKO_hypo_dmr_1492|4|0.314|0.661	0	.
chr1	20143141	20143195	P39_cKOvsControl_cKO_hypo_dmr_1493|3|0.550|0.935	0	.
chr1	20149951	20150104	P39_cKOvsControl_cKO_hypo_dmr_1495|3|0.245|0.607	0	.
chr1	20179970	20181587	P39_cKOvsControl_cKO_hypo_dmr_1496|23|0.271|0.752	0	.
chr1	20190097	20190788	P39_cKOvsControl_cKO_hypo_dmr_1497|13|0.066|0.512	0	.
chr1	20213980	20214009	P39_cKOvsControl_cKO_hypo_dmr_1498|3|0.371|0.720	0	.
chr1	20216657	20216706	P39_cKOvsControl_cKO_hypo_dmr_1499|8|0.016|0.834	0	.
chr1	20221210	20221249	P39_cKOvsControl_cKO_hypo_dmr_1500|3|0.326|0.747	0	.
chr1	20240178	20240720	P39_cKOvsControl_cKO_hypo_dmr_1501|8|0.303|0.780	0	.
chr1	20248211	20248430	P39_cKOvsControl_cKO_hypo_dmr_1502|3|0.080|0.620	0	.
chr1	20251917	20252068	P39_cKOvsControl_cKO_hypo_dmr_1503|5|0.314|0.730	0	.
chr1	20259209	20261022	P39_cKOvsControl_cKO_hypo_dmr_1504|13|0.504|0.816	0	.
chr1	20288147	20289141	P39_cKOvsControl_cKO_hypo_dmr_1505|8|0.351|0.707	0	.
chr1	20302409	20303230	P39_cKOvsControl_cKO_hypo_dmr_1506|14|0.024|0.457	0	.
chr1	20306030	20306324	P39_cKOvsControl_cKO_hypo_dmr_1507|5|0.362|0.826	0	.
chr1	20310409	20310823	P39_cKOvsControl_cKO_hypo_dmr_1509|3|0.465|0.841	0	.
chr1	20312898	20313077	P39_cKOvsControl_cKO_hypo_dmr_1510|4|0.337|0.758	0	.
chr1	20344346	20345178	P39_cKOvsControl_cKO_hypo_dmr_1512|15|0.240|0.796	0	.
chr1	20372726	20373214	P39_cKOvsControl_cKO_hypo_dmr_1515|5|0.566|0.867	0	.
chr1	20377519	20377612	P39_cKOvsControl_cKO_hypo_dmr_1516|3|0.060|0.419	0	.
chr1	20398677	20398712	P39_cKOvsControl_cKO_hypo_dmr_1517|3|0.530|0.899	0	.
chr1	20408715	20410004	P39_cKOvsControl_cKO_hypo_dmr_1519|23|0.264|0.786	0	.
chr1	20428671	20430059	P39_cKOvsControl_cKO_hypo_dmr_1520|23|0.339|0.661	0	.
chr1	20430777	20431157	P39_cKOvsControl_cKO_hypo_dmr_1521|3|0.366|0.826	0	.
chr1	20440909	20441214	P39_cKOvsControl_cKO_hypo_dmr_1522|8|0.150|0.703	0	.
chr1	20457889	20458138	P39_cKOvsControl_cKO_hypo_dmr_1524|7|0.483|0.874	0	.
chr1	20464267	20464519	P39_cKOvsControl_cKO_hypo_dmr_1525|3|0.396|0.789	0	.
chr1	20466216	20466737	P39_cKOvsControl_cKO_hypo_dmr_1526|11|0.277|0.765	0	.
chr1	20470505	20471121	P39_cKOvsControl_cKO_hypo_dmr_1527|16|0.200|0.584	0	.
chr1	20477333	20477798	P39_cKOvsControl_cKO_hypo_dmr_1530|12|0.246|0.732	0	.
chr1	20497682	20497697	P39_cKOvsControl_cKO_hypo_dmr_1532|3|0.569|0.908	0	.
chr1	20501438	20504562	P39_cKOvsControl_cKO_hypo_dmr_1533|48|0.418|0.816	0	.
chr1	20511950	20512016	P39_cKOvsControl_cKO_hypo_dmr_1537|7|0.428|0.803	0	.
chr1	20568453	20569624	P39_cKOvsControl_cKO_hypo_dmr_1540|11|0.480|0.821	0	.
chr1	20590450	20590750	P39_cKOvsControl_cKO_hypo_dmr_1541|7|0.326|0.775	0	.
chr1	20606549	20606735	P39_cKOvsControl_cKO_hypo_dmr_1543|5|0.442|0.822	0	.
chr1	20618773	20620044	P39_cKOvsControl_cKO_hypo_dmr_1545|9|0.498|0.824	0	.
chr1	20665544	20665756	P39_cKOvsControl_cKO_hypo_dmr_1546|4|0.308|0.716	0	.
chr1	20670771	20672725	P39_cKOvsControl_cKO_hypo_dmr_1549|16|0.500|0.801	0	.
chr1	20674589	20674712	P39_cKOvsControl_cKO_hypo_dmr_1550|4|0.323|0.718	0	.
chr1	20677803	20678762	P39_cKOvsControl_cKO_hypo_dmr_1551|11|0.282|0.740	0	.
chr1	20692321	20692788	P39_cKOvsControl_cKO_hypo_dmr_1553|4|0.611|0.919	0	.
chr1	20724997	20725499	P39_cKOvsControl_cKO_hypo_dmr_1556|7|0.340|0.691	0	.
chr1	20736828	20736892	P39_cKOvsControl_cKO_hypo_dmr_1557|3|0.570|0.870	0	.
chr1	20739696	20740354	P39_cKOvsControl_cKO_hypo_dmr_1558|6|0.475|0.806	0	.
chr1	20761260	20761709	P39_cKOvsControl_cKO_hypo_dmr_1559|12|0.170|0.725	0	.
chr1	20822967	20824790	P39_cKOvsControl_cKO_hypo_dmr_1564|32|0.075|0.608	0	.
chr1	20844356	20844546	P39_cKOvsControl_cKO_hypo_dmr_1566|5|0.345|0.778	0	.
chr1	20845049	20846721	P39_cKOvsControl_cKO_hypo_dmr_1567|33|0.366|0.802	0	.
chr1	20860942	20861026	P39_cKOvsControl_cKO_hypo_dmr_1569|3|0.224|0.563	0	.
chr1	20863960	20863991	P39_cKOvsControl_cKO_hypo_dmr_1570|3|0.453|0.889	0	.
chr1	20867503	20868608	P39_cKOvsControl_cKO_hypo_dmr_1571|25|0.126|0.563	0	.
chr1	20872295	20872419	P39_cKOvsControl_cKO_hypo_dmr_1572|3|0.300|0.686	0	.
chr1	20881452	20881938	P39_cKOvsControl_cKO_hypo_dmr_1573|7|0.364|0.710	0	.
chr1	20889803	20889812	P39_cKOvsControl_cKO_hypo_dmr_1574|3|0.471|0.889	0	.
chr1	20891713	20893814	P39_cKOvsControl_cKO_hypo_dmr_1575|32|0.207|0.632	0	.
chr1	20900473	20901306	P39_cKOvsControl_cKO_hypo_dmr_1578|13|0.281|0.687	0	.
chr1	20903255	20903563	P39_cKOvsControl_cKO_hypo_dmr_1580|3|0.411|0.789	0	.
chr1	20907324	20909011	P39_cKOvsControl_cKO_hypo_dmr_1581|28|0.119|0.802	0	.
chr1	20910265	20910493	P39_cKOvsControl_cKO_hypo_dmr_1582|7|0.535|0.951	0	.
chr1	20911327	20912911	P39_cKOvsControl_cKO_hypo_dmr_1583|23|0.280|0.663	0	.
chr1	20917013	20917108	P39_cKOvsControl_cKO_hypo_dmr_1585|4|0.405|0.813	0	.
chr1	20920549	20922536	P39_cKOvsControl_cKO_hypo_dmr_1587|49|0.314|0.751	0	.
chr1	20984178	20984741	P39_cKOvsControl_cKO_hypo_dmr_1592|6|0.215|0.608	0	.
chr1	20986306	20986858	P39_cKOvsControl_cKO_hypo_dmr_1593|13|0.452|0.770	0	.
chr1	20996619	20997045	P39_cKOvsControl_cKO_hypo_dmr_1595|14|0.522|0.896	0	.
chr1	20998020	20998596	P39_cKOvsControl_cKO_hypo_dmr_1596|16|0.275|0.779	0	.
chr1	21002664	21003561	P39_cKOvsControl_cKO_hypo_dmr_1597|22|0.336|0.844	0	.
chr1	21004715	21005296	P39_cKOvsControl_cKO_hypo_dmr_1598|8|0.243|0.566	0	.
chr1	21006852	21007310	P39_cKOvsControl_cKO_hypo_dmr_1599|5|0.386|0.768	0	.
chr1	21025075	21025102	P39_cKOvsControl_cKO_hypo_dmr_1600|3|0.115|0.535	0	.
chr1	21026587	21026719	P39_cKOvsControl_cKO_hypo_dmr_1601|5|0.329|0.813	0	.
chr1	21039323	21039970	P39_cKOvsControl_cKO_hypo_dmr_1603|6|0.388|0.806	0	.
chr1	21052389	21053286	P39_cKOvsControl_cKO_hypo_dmr_1606|12|0.331|0.647	0	.
chr1	21062473	21062642	P39_cKOvsControl_cKO_hypo_dmr_1607|4|0.470|0.842	0	.
chr1	21075175	21078696	P39_cKOvsControl_cKO_hypo_dmr_1612|37|0.317|0.734	0	.
chr1	21080200	21080207	P39_cKOvsControl_cKO_hypo_dmr_1613|3|0.204|0.539	0	.
chr1	21126955	21126997	P39_cKOvsControl_cKO_hypo_dmr_1620|3|0.197|0.670	0	.
chr1	21194511	21194639	P39_cKOvsControl_cKO_hypo_dmr_1626|4|0.483|0.919	0	.
chr1	21230001	21230638	P39_cKOvsControl_cKO_hypo_dmr_1627|4|0.384|0.719	0	.
chr1	21231821	21231946	P39_cKOvsControl_cKO_hypo_dmr_1628|3|0.038|0.560	0	.
chr1	21236648	21236732	P39_cKOvsControl_cKO_hypo_dmr_1629|5|0.212|0.582	0	.
chr1	21256088	21256781	P39_cKOvsControl_cKO_hypo_dmr_1632|4|0.419|0.764	0	.
chr1	21259417	21260215	P39_cKOvsControl_cKO_hypo_dmr_1633|8|0.553|0.858	0	.
chr1	21261720	21262366	P39_cKOvsControl_cKO_hypo_dmr_1634|6|0.552|0.858	0	.
chr1	21272340	21273243	P39_cKOvsControl_cKO_hypo_dmr_1635|16|0.232|0.534	0	.
chr1	21347237	21347647	P39_cKOvsControl_cKO_hypo_dmr_1639|4|0.529|0.859	0	.
chr1	21364901	21365286	P39_cKOvsControl_cKO_hypo_dmr_1640|3|0.454|0.895	0	.
chr1	21379652	21380289	P39_cKOvsControl_cKO_hypo_dmr_1641|4|0.472|0.801	0	.
chr1	21406469	21406675	P39_cKOvsControl_cKO_hypo_dmr_1643|3|0.237|0.630	0	.
chr1	21407208	21407444	P39_cKOvsControl_cKO_hypo_dmr_1644|6|0.141|0.713	0	.
chr1	21412329	21412658	P39_cKOvsControl_cKO_hypo_dmr_1645|4|0.279|0.653	0	.
chr1	21414725	21415889	P39_cKOvsControl_cKO_hypo_dmr_1646|12|0.265|0.675	0	.
chr1	21418152	21418857	P39_cKOvsControl_cKO_hypo_dmr_1647|16|0.079|0.566	0	.
chr1	21431891	21431949	P39_cKOvsControl_cKO_hypo_dmr_1650|3|0.436|0.810	0	.
chr1	21436231	21437756	P39_cKOvsControl_cKO_hypo_dmr_1652|21|0.317|0.774	0	.
chr1	21451231	21451739	P39_cKOvsControl_cKO_hypo_dmr_1653|4|0.234|0.604	0	.
chr1	21470378	21470393	P39_cKOvsControl_cKO_hypo_dmr_1658|3|0.127|0.609	0	.
chr1	21487159	21487483	P39_cKOvsControl_cKO_hypo_dmr_1661|10|0.125|0.701	0	.
chr1	21535707	21535839	P39_cKOvsControl_cKO_hypo_dmr_1664|3|0.030|0.354	0	.
chr1	21554746	21554913	P39_cKOvsControl_cKO_hypo_dmr_1665|6|0.276|0.620	0	.
chr1	21558639	21558712	P39_cKOvsControl_cKO_hypo_dmr_1666|3|0.214|0.535	0	.
chr1	21594089	21594335	P39_cKOvsControl_cKO_hypo_dmr_1668|7|0.449|0.749	0	.
chr1	21601042	21601559	P39_cKOvsControl_cKO_hypo_dmr_1669|6|0.169|0.477	0	.
chr1	21607593	21607698	P39_cKOvsControl_cKO_hypo_dmr_1670|4|0.210|0.669	0	.
chr1	21615344	21615543	P39_cKOvsControl_cKO_hypo_dmr_1671|3|0.315|0.707	0	.
chr1	21635614	21636267	P39_cKOvsControl_cKO_hypo_dmr_1675|7|0.245|0.574	0	.
chr1	21650546	21651747	P39_cKOvsControl_cKO_hypo_dmr_1677|15|0.094|0.429	0	.
chr1	21660879	21661273	P39_cKOvsControl_cKO_hypo_dmr_1680|8|0.023|0.767	0	.
chr1	21664002	21664633	P39_cKOvsControl_cKO_hypo_dmr_1681|8|0.404|0.764	0	.
chr1	21673706	21673872	P39_cKOvsControl_cKO_hypo_dmr_1682|8|0.253|0.826	0	.
chr1	21681189	21681498	P39_cKOvsControl_cKO_hypo_dmr_1683|5|0.225|0.608	0	.
chr1	21707368	21707418	P39_cKOvsControl_cKO_hypo_dmr_1684|4|0.080|0.531	0	.
chr1	21714056	21714365	P39_cKOvsControl_cKO_hypo_dmr_1685|5|0.328|0.661	0	.
chr1	21745218	21746007	P39_cKOvsControl_cKO_hypo_dmr_1686|6|0.176|0.602	0	.
chr1	21760038	21760069	P39_cKOvsControl_cKO_hypo_dmr_1687|4|0.223|0.681	0	.
chr1	21774106	21774196	P39_cKOvsControl_cKO_hypo_dmr_1688|5|0.136|0.544	0	.
chr1	21779041	21779150	P39_cKOvsControl_cKO_hypo_dmr_1689|3|0.365|0.681	0	.
chr1	21792527	21792814	P39_cKOvsControl_cKO_hypo_dmr_1691|3|0.399|0.724	0	.
chr1	21800379	21800400	P39_cKOvsControl_cKO_hypo_dmr_1692|4|0.258|0.781	0	.
chr1	21820095	21821050	P39_cKOvsControl_cKO_hypo_dmr_1693|20|0.068|0.709	0	.
chr1	21830325	21830460	P39_cKOvsControl_cKO_hypo_dmr_1695|3|0.170|0.476	0	.
chr1	21850767	21850916	P39_cKOvsControl_cKO_hypo_dmr_1696|4|0.072|0.598	0	.
chr1	21855150	21855375	P39_cKOvsControl_cKO_hypo_dmr_1698|3|0.408|0.712	0	.
chr1	21855942	21856346	P39_cKOvsControl_cKO_hypo_dmr_1699|7|0.363|0.817	0	.
chr1	21870975	21871213	P39_cKOvsControl_cKO_hypo_dmr_1700|5|0.472|0.829	0	.
chr1	21912084	21912274	P39_cKOvsControl_cKO_hypo_dmr_1703|4|0.401|0.709	0	.
chr1	21919474	21920021	P39_cKOvsControl_cKO_hypo_dmr_1704|5|0.176|0.493	0	.
chr1	21924641	21924725	P39_cKOvsControl_cKO_hypo_dmr_1706|4|0.157|0.592	0	.
chr1	21928139	21929180	P39_cKOvsControl_cKO_hypo_dmr_1707|14|0.220|0.693	0	.
chr1	21970765	21971053	P39_cKOvsControl_cKO_hypo_dmr_1710|4|0.449|0.783	0	.
chr1	21983975	21984617	P39_cKOvsControl_cKO_hypo_dmr_1711|4|0.415|0.747	0	.
chr1	22036155	22036827	P39_cKOvsControl_cKO_hypo_dmr_1712|18|0.165|0.577	0	.
chr1	22042995	22043250	P39_cKOvsControl_cKO_hypo_dmr_1714|10|0.396|0.927	0	.
chr1	22048720	22048882	P39_cKOvsControl_cKO_hypo_dmr_1715|5|0.198|0.771	0	.
chr1	22065359	22065423	P39_cKOvsControl_cKO_hypo_dmr_1716|4|0.348|0.710	0	.
chr1	22069692	22070436	P39_cKOvsControl_cKO_hypo_dmr_1717|15|0.236|0.658	0	.
chr1	22103338	22103868	P39_cKOvsControl_cKO_hypo_dmr_1720|14|0.554|0.882	0	.
chr1	22105729	22105795	P39_cKOvsControl_cKO_hypo_dmr_1721|3|0.483|0.926	0	.
chr1	22110995	22112466	P39_cKOvsControl_cKO_hypo_dmr_1722|10|0.412|0.745	0	.
chr1	22114129	22114584	P39_cKOvsControl_cKO_hypo_dmr_1723|8|0.441|0.821	0	.
chr1	22118396	22120177	P39_cKOvsControl_cKO_hypo_dmr_1725|12|0.308|0.631	0	.
chr1	22180518	22180690	P39_cKOvsControl_cKO_hypo_dmr_1728|4|0.350|0.763	0	.
chr1	22184721	22184757	P39_cKOvsControl_cKO_hypo_dmr_1729|4|0.468|0.853	0	.
chr1	22190223	22190366	P39_cKOvsControl_cKO_hypo_dmr_1730|3|0.326|0.665	0	.
chr1	22193604	22194263	P39_cKOvsControl_cKO_hypo_dmr_1731|5|0.077|0.523	0	.
chr1	22197632	22197960	P39_cKOvsControl_cKO_hypo_dmr_1732|4|0.439|0.823	0	.
chr1	22201485	22203044	P39_cKOvsControl_cKO_hypo_dmr_1733|14|0.287|0.597	0	.
chr1	22203887	22204376	P39_cKOvsControl_cKO_hypo_dmr_1734|5|0.127|0.475	0	.
chr1	22207005	22207758	P39_cKOvsControl_cKO_hypo_dmr_1735|11|0.261|0.766	0	.
chr1	22213802	22214095	P39_cKOvsControl_cKO_hypo_dmr_1736|6|0.533|0.855	0	.
chr1	22214931	22215238	P39_cKOvsControl_cKO_hypo_dmr_1737|3|0.247|0.572	0	.
chr1	22228294	22228329	P39_cKOvsControl_cKO_hypo_dmr_1738|5|0.223|0.808	0	.
chr1	22241803	22241867	P39_cKOvsControl_cKO_hypo_dmr_1740|5|0.431|0.836	0	.
chr1	22247102	22247189	P39_cKOvsControl_cKO_hypo_dmr_1741|3|0.095|0.457	0	.
chr1	22253933	22254152	P39_cKOvsControl_cKO_hypo_dmr_1743|3|0.427|0.793	0	.
chr1	22262007	22262088	P39_cKOvsControl_cKO_hypo_dmr_1745|4|0.371|0.807	0	.
chr1	22263688	22264074	P39_cKOvsControl_cKO_hypo_dmr_1746|10|0.039|0.540	0	.
chr1	22267728	22268239	P39_cKOvsControl_cKO_hypo_dmr_1747|12|0.228|0.682	0	.
chr1	22292530	22294651	P39_cKOvsControl_cKO_hypo_dmr_1748|16|0.321|0.646	0	.
chr1	22313937	22314115	P39_cKOvsControl_cKO_hypo_dmr_1752|3|0.145|0.505	0	.
chr1	22314782	22316469	P39_cKOvsControl_cKO_hypo_dmr_1753|13|0.369|0.718	0	.
chr1	22320681	22321278	P39_cKOvsControl_cKO_hypo_dmr_1754|15|0.354|0.804	0	.
chr1	22339073	22339971	P39_cKOvsControl_cKO_hypo_dmr_1756|23|0.413|0.741	0	.
chr1	22353906	22353988	P39_cKOvsControl_cKO_hypo_dmr_1758|3|0.104|0.494	0	.
chr1	22355880	22356528	P39_cKOvsControl_cKO_hypo_dmr_1759|8|0.378|0.704	0	.
chr1	22429527	22429680	P39_cKOvsControl_cKO_hypo_dmr_1761|5|0.316|0.659	0	.
chr1	22508890	22509348	P39_cKOvsControl_cKO_hypo_dmr_1762|6|0.254|0.620	0	.
chr1	22534085	22535210	P39_cKOvsControl_cKO_hypo_dmr_1765|23|0.205|0.581	0	.
chr1	22535862	22535875	P39_cKOvsControl_cKO_hypo_dmr_1766|3|0.068|0.423	0	.
chr1	22598618	22599647	P39_cKOvsControl_cKO_hypo_dmr_1768|12|0.296|0.691	0	.
chr1	22620997	22621187	P39_cKOvsControl_cKO_hypo_dmr_1769|4|0.287|0.629	0	.
chr1	22629006	22629411	P39_cKOvsControl_cKO_hypo_dmr_1770|18|0.179|0.669	0	.
chr1	22648836	22648868	P39_cKOvsControl_cKO_hypo_dmr_1772|3|0.186|0.565	0	.
chr1	22651690	22651831	P39_cKOvsControl_cKO_hypo_dmr_1773|6|0.241|0.695	0	.
chr1	22687602	22687852	P39_cKOvsControl_cKO_hypo_dmr_1775|5|0.164|0.493	0	.
chr1	22724349	22724481	P39_cKOvsControl_cKO_hypo_dmr_1776|5|0.208|0.648	0	.
chr1	22737795	22737945	P39_cKOvsControl_cKO_hypo_dmr_1778|3|0.154|0.572	0	.
chr1	22770573	22771214	P39_cKOvsControl_cKO_hypo_dmr_1779|11|0.033|0.403	0	.
chr1	22824932	22825176	P39_cKOvsControl_cKO_hypo_dmr_1783|3|0.305|0.674	0	.
chr1	22846055	22846499	P39_cKOvsControl_cKO_hypo_dmr_1785|3|0.333|0.706	0	.
chr1	22880828	22880863	P39_cKOvsControl_cKO_hypo_dmr_1787|3|0.079|0.426	0	.
chr1	22883191	22883253	P39_cKOvsControl_cKO_hypo_dmr_1788|3|0.521|0.826	0	.
chr1	22885984	22886134	P39_cKOvsControl_cKO_hypo_dmr_1789|4|0.500|0.841	0	.
chr1	22889409	22889644	P39_cKOvsControl_cKO_hypo_dmr_1790|3|0.532|0.866	0	.
chr1	22893142	22893630	P39_cKOvsControl_cKO_hypo_dmr_1792|5|0.269|0.710	0	.
chr1	22902970	22903410	P39_cKOvsControl_cKO_hypo_dmr_1793|4|0.289|0.617	0	.
chr1	22906620	22907034	P39_cKOvsControl_cKO_hypo_dmr_1794|3|0.433|0.836	0	.
chr1	22926793	22927091	P39_cKOvsControl_cKO_hypo_dmr_1796|4|0.266|0.659	0	.
chr1	22937551	22937631	P39_cKOvsControl_cKO_hypo_dmr_1797|3|0.032|0.369	0	.
chr1	22954034	22954519	P39_cKOvsControl_cKO_hypo_dmr_1798|4|0.468|0.775	0	.
chr1	22989731	22990475	P39_cKOvsControl_cKO_hypo_dmr_1800|8|0.461|0.784	0	.
chr1	23003755	23003970	P39_cKOvsControl_cKO_hypo_dmr_1801|3|0.032|0.665	0	.
chr1	23005043	23005381	P39_cKOvsControl_cKO_hypo_dmr_1802|8|0.022|0.382	0	.
chr1	23005958	23006016	P39_cKOvsControl_cKO_hypo_dmr_1803|4|0.297|0.846	0	.
chr1	23007553	23007908	P39_cKOvsControl_cKO_hypo_dmr_1804|8|0.234|0.636	0	.
chr1	23015918	23016002	P39_cKOvsControl_cKO_hypo_dmr_1805|3|0.286|0.793	0	.
chr1	23028044	23028558	P39_cKOvsControl_cKO_hypo_dmr_1808|8|0.527|0.835	0	.
chr1	23040179	23040296	P39_cKOvsControl_cKO_hypo_dmr_1811|4|0.466|0.877	0	.
chr1	23087581	23087618	P39_cKOvsControl_cKO_hypo_dmr_1816|4|0.235|0.739	0	.
chr1	23093294	23093570	P39_cKOvsControl_cKO_hypo_dmr_1817|8|0.347|0.803	0	.
chr1	23097796	23098014	P39_cKOvsControl_cKO_hypo_dmr_1818|4|0.123|0.543	0	.
chr1	23100617	23100711	P39_cKOvsControl_cKO_hypo_dmr_1819|3|0.297|0.774	0	.
chr1	23111327	23112295	P39_cKOvsControl_cKO_hypo_dmr_1821|9|0.381|0.758	0	.
chr1	23114283	23114610	P39_cKOvsControl_cKO_hypo_dmr_1822|5|0.142|0.529	0	.
chr1	23118711	23118994	P39_cKOvsControl_cKO_hypo_dmr_1823|6|0.151|0.465	0	.
chr1	23121033	23121118	P39_cKOvsControl_cKO_hypo_dmr_1824|5|0.263|0.777	0	.
chr1	23139424	23139646	P39_cKOvsControl_cKO_hypo_dmr_1825|5|0.299|0.829	0	.
chr1	23145688	23146610	P39_cKOvsControl_cKO_hypo_dmr_1826|13|0.258|0.771	0	.
chr1	23149288	23149360	P39_cKOvsControl_cKO_hypo_dmr_1827|3|0.109|0.427	0	.
chr1	23163054	23163452	P39_cKOvsControl_cKO_hypo_dmr_1828|4|0.329|0.656	0	.
chr1	23173180	23173319	P39_cKOvsControl_cKO_hypo_dmr_1829|4|0.164|0.478	0	.
chr1	23178338	23178728	P39_cKOvsControl_cKO_hypo_dmr_1831|6|0.502|0.844	0	.
chr1	23191827	23192035	P39_cKOvsControl_cKO_hypo_dmr_1833|6|0.506|0.829	0	.
chr1	23196869	23197325	P39_cKOvsControl_cKO_hypo_dmr_1834|5|0.349|0.854	0	.
chr1	23202841	23202916	P39_cKOvsControl_cKO_hypo_dmr_1836|4|0.022|0.410	0	.
chr1	23206963	23207163	P39_cKOvsControl_cKO_hypo_dmr_1837|6|0.125|0.574	0	.
chr1	23215107	23215290	P39_cKOvsControl_cKO_hypo_dmr_1838|5|0.099|0.424	0	.
chr1	23230702	23230776	P39_cKOvsControl_cKO_hypo_dmr_1840|3|0.398|0.856	0	.
chr1	23261732	23261916	P39_cKOvsControl_cKO_hypo_dmr_1841|4|0.082|0.419	0	.
chr1	23276688	23276703	P39_cKOvsControl_cKO_hypo_dmr_1844|4|0.126|0.758	0	.
chr1	23330777	23330782	P39_cKOvsControl_cKO_hypo_dmr_1848|3|0.296|0.806	0	.
chr1	23338769	23338942	P39_cKOvsControl_cKO_hypo_dmr_1850|8|0.507|0.883	0	.
chr1	23341865	23342184	P39_cKOvsControl_cKO_hypo_dmr_1851|9|0.561|0.877	0	.
chr1	23343053	23343201	P39_cKOvsControl_cKO_hypo_dmr_1852|4|0.396|0.699	0	.
chr1	23351953	23352088	P39_cKOvsControl_cKO_hypo_dmr_1853|6|0.098|0.724	0	.
chr1	23361321	23362327	P39_cKOvsControl_cKO_hypo_dmr_1856|6|0.410|0.780	0	.
chr1	23367284	23367291	P39_cKOvsControl_cKO_hypo_dmr_1857|3|0.260|0.620	0	.
chr1	23370574	23370910	P39_cKOvsControl_cKO_hypo_dmr_1858|11|0.538|0.874	0	.
chr1	23374213	23374465	P39_cKOvsControl_cKO_hypo_dmr_1859|5|0.445|0.844	0	.
chr1	23376500	23376529	P39_cKOvsControl_cKO_hypo_dmr_1860|3|0.468|0.804	0	.
chr1	23378787	23378888	P39_cKOvsControl_cKO_hypo_dmr_1862|3|0.272|0.773	0	.
chr1	23385862	23385936	P39_cKOvsControl_cKO_hypo_dmr_1863|4|0.206|0.704	0	.
chr1	23391041	23391688	P39_cKOvsControl_cKO_hypo_dmr_1865|6|0.532|0.841	0	.
chr1	23392973	23393124	P39_cKOvsControl_cKO_hypo_dmr_1866|3|0.474|0.797	0	.
chr1	23416479	23416540	P39_cKOvsControl_cKO_hypo_dmr_1869|4|0.103|0.727	0	.
chr1	23443576	23443654	P39_cKOvsControl_cKO_hypo_dmr_1871|3|0.506|0.924	0	.
chr1	23444241	23444762	P39_cKOvsControl_cKO_hypo_dmr_1872|10|0.274|0.789	0	.
chr1	23457427	23457575	P39_cKOvsControl_cKO_hypo_dmr_1873|4|0.255|0.745	0	.
chr1	23474340	23474837	P39_cKOvsControl_cKO_hypo_dmr_1875|5|0.338|0.661	0	.
chr1	23487534	23488251	P39_cKOvsControl_cKO_hypo_dmr_1876|6|0.344|0.822	0	.
chr1	23489932	23490595	P39_cKOvsControl_cKO_hypo_dmr_1877|14|0.047|0.421	0	.
chr1	23493713	23494127	P39_cKOvsControl_cKO_hypo_dmr_1878|3|0.384|0.705	0	.
chr1	23519120	23519138	P39_cKOvsControl_cKO_hypo_dmr_1882|4|0.181|0.698	0	.
chr1	23519737	23520522	P39_cKOvsControl_cKO_hypo_dmr_1883|9|0.347|0.792	0	.
chr1	23532670	23532797	P39_cKOvsControl_cKO_hypo_dmr_1884|5|0.518|0.951	0	.
chr1	23536591	23536909	P39_cKOvsControl_cKO_hypo_dmr_1885|15|0.388|0.804	0	.
chr1	23538044	23538995	P39_cKOvsControl_cKO_hypo_dmr_1886|17|0.362|0.809	0	.
chr1	23541518	23541536	P39_cKOvsControl_cKO_hypo_dmr_1887|3|0.368|0.797	0	.
chr1	23559616	23560552	P39_cKOvsControl_cKO_hypo_dmr_1888|8|0.432|0.828	0	.
chr1	23573305	23574900	P39_cKOvsControl_cKO_hypo_dmr_1889|47|0.331|0.757	0	.
chr1	23575496	23576414	P39_cKOvsControl_cKO_hypo_dmr_1890|15|0.151|0.546	0	.
chr1	23588102	23588851	P39_cKOvsControl_cKO_hypo_dmr_1892|9|0.265|0.665	0	.
chr1	23589354	23590439	P39_cKOvsControl_cKO_hypo_dmr_1893|19|0.281|0.672	0	.
chr1	23593665	23594244	P39_cKOvsControl_cKO_hypo_dmr_1894|7|0.420|0.723	0	.
chr1	23594886	23594970	P39_cKOvsControl_cKO_hypo_dmr_1895|3|0.447|0.762	0	.
chr1	23642248	23642355	P39_cKOvsControl_cKO_hypo_dmr_1897|3|0.548|0.928	0	.
chr1	23643045	23643400	P39_cKOvsControl_cKO_hypo_dmr_1898|12|0.268|0.659	0	.
chr1	23649131	23649343	P39_cKOvsControl_cKO_hypo_dmr_1899|5|0.228|0.838	0	.
chr1	23655413	23657991	P39_cKOvsControl_cKO_hypo_dmr_1901|37|0.416|0.718	0	.
chr1	23670259	23671046	P39_cKOvsControl_cKO_hypo_dmr_1902|14|0.156|0.520	0	.
chr1	23687958	23688277	P39_cKOvsControl_cKO_hypo_dmr_1904|3|0.221|0.656	0	.
chr1	23689113	23689899	P39_cKOvsControl_cKO_hypo_dmr_1905|15|0.327|0.798	0	.
chr1	23703688	23704790	P39_cKOvsControl_cKO_hypo_dmr_1906|12|0.353|0.682	0	.
chr1	23705354	23706950	P39_cKOvsControl_cKO_hypo_dmr_1907|18|0.274|0.602	0	.
chr1	23714667	23714960	P39_cKOvsControl_cKO_hypo_dmr_1908|7|0.326|0.753	0	.
chr1	23718730	23719963	P39_cKOvsControl_cKO_hypo_dmr_1910|20|0.449|0.856	0	.
chr1	23722107	23724406	P39_cKOvsControl_cKO_hypo_dmr_1911|46|0.275|0.703	0	.
chr1	23732556	23733275	P39_cKOvsControl_cKO_hypo_dmr_1913|10|0.375|0.713	0	.
chr1	23764185	23766991	P39_cKOvsControl_cKO_hypo_dmr_1920|44|0.153|0.709	0	.
chr1	23767592	23768071	P39_cKOvsControl_cKO_hypo_dmr_1921|12|0.374|0.801	0	.
chr1	23775247	23775730	P39_cKOvsControl_cKO_hypo_dmr_1923|7|0.468|0.844	0	.
chr1	23791321	23791561	P39_cKOvsControl_cKO_hypo_dmr_1926|6|0.419|0.882	0	.
chr1	23793987	23794930	P39_cKOvsControl_cKO_hypo_dmr_1927|16|0.431|0.838	0	.
chr1	23806236	23806445	P39_cKOvsControl_cKO_hypo_dmr_1929|3|0.217|0.677	0	.
chr1	23821451	23821958	P39_cKOvsControl_cKO_hypo_dmr_1930|9|0.123|0.440	0	.
chr1	23825405	23825623	P39_cKOvsControl_cKO_hypo_dmr_1931|6|0.572|0.892	0	.
chr1	23836148	23836245	P39_cKOvsControl_cKO_hypo_dmr_1934|5|0.133|0.512	0	.
chr1	23850773	23850884	P39_cKOvsControl_cKO_hypo_dmr_1936|5|0.045|0.379	0	.
chr1	23885077	23885282	P39_cKOvsControl_cKO_hypo_dmr_1937|5|0.033|0.605	0	.
chr1	23944729	23944762	P39_cKOvsControl_cKO_hypo_dmr_1938|3|0.343|0.759	0	.
chr1	23948856	23949116	P39_cKOvsControl_cKO_hypo_dmr_1939|8|0.019|0.360	0	.
chr1	23959126	23959785	P39_cKOvsControl_cKO_hypo_dmr_1941|19|0.096|0.593	0	.
chr1	23962392	23962832	P39_cKOvsControl_cKO_hypo_dmr_1942|4|0.157|0.724	0	.
chr1	23967229	23967344	P39_cKOvsControl_cKO_hypo_dmr_1943|3|0.431|0.825	0	.
chr1	24020609	24020729	P39_cKOvsControl_cKO_hypo_dmr_1947|5|0.436|0.751	0	.
chr1	24026906	24027422	P39_cKOvsControl_cKO_hypo_dmr_1948|8|0.136|0.719	0	.
chr1	24043087	24043290	P39_cKOvsControl_cKO_hypo_dmr_1949|7|0.037|0.661	0	.
chr1	24064844	24065124	P39_cKOvsControl_cKO_hypo_dmr_1953|4|0.384|0.778	0	.
chr1	24069768	24070206	P39_cKOvsControl_cKO_hypo_dmr_1955|3|0.267|0.675	0	.
chr1	24072829	24073968	P39_cKOvsControl_cKO_hypo_dmr_1956|13|0.107|0.671	0	.
chr1	24084633	24084970	P39_cKOvsControl_cKO_hypo_dmr_1957|7|0.260|0.718	0	.
chr1	24086437	24086446	P39_cKOvsControl_cKO_hypo_dmr_1958|4|0.089|0.595	0	.
chr1	24092576	24092640	P39_cKOvsControl_cKO_hypo_dmr_1959|3|0.317|0.790	0	.
chr1	24109101	24109878	P39_cKOvsControl_cKO_hypo_dmr_1961|5|0.317|0.628	0	.
chr1	24121695	24121970	P39_cKOvsControl_cKO_hypo_dmr_1964|6|0.248|0.649	0	.
chr1	24127343	24127397	P39_cKOvsControl_cKO_hypo_dmr_1966|3|0.341|0.723	0	.
chr1	24128031	24128137	P39_cKOvsControl_cKO_hypo_dmr_1967|7|0.047|0.639	0	.
chr1	24136361	24136452	P39_cKOvsControl_cKO_hypo_dmr_1971|3|0.552|0.960	0	.
chr1	24139831	24142573	P39_cKOvsControl_cKO_hypo_dmr_1972|50|0.350|0.746	0	.
chr1	24164031	24164600	P39_cKOvsControl_cKO_hypo_dmr_1974|7|0.532|0.857	0	.
chr1	24173119	24174081	P39_cKOvsControl_cKO_hypo_dmr_1976|11|0.272|0.607	0	.
chr1	24186149	24187557	P39_cKOvsControl_cKO_hypo_dmr_1980|35|0.299|0.764	0	.
chr1	24188623	24189529	P39_cKOvsControl_cKO_hypo_dmr_1981|9|0.219|0.553	0	.
chr1	24190382	24190872	P39_cKOvsControl_cKO_hypo_dmr_1982|10|0.509|0.862	0	.
chr1	24191418	24192161	P39_cKOvsControl_cKO_hypo_dmr_1983|16|0.113|0.735	0	.
chr1	24193361	24197051	P39_cKOvsControl_cKO_hypo_dmr_1984|61|0.338|0.836	0	.
chr1	24211263	24212420	P39_cKOvsControl_cKO_hypo_dmr_1986|17|0.380|0.725	0	.
chr1	24216134	24216314	P39_cKOvsControl_cKO_hypo_dmr_1987|3|0.272|0.659	0	.
chr1	24217439	24217484	P39_cKOvsControl_cKO_hypo_dmr_1988|3|0.328|0.783	0	.
chr1	24218425	24218513	P39_cKOvsControl_cKO_hypo_dmr_1989|5|0.351|0.839	0	.
chr1	24221832	24221967	P39_cKOvsControl_cKO_hypo_dmr_1990|7|0.595|0.959	0	.
chr1	24225409	24225502	P39_cKOvsControl_cKO_hypo_dmr_1991|4|0.481|0.829	0	.
chr1	24230975	24232000	P39_cKOvsControl_cKO_hypo_dmr_1992|8|0.391|0.800	0	.
chr1	24233311	24234533	P39_cKOvsControl_cKO_hypo_dmr_1993|21|0.125|0.594	0	.
chr1	24235063	24235829	P39_cKOvsControl_cKO_hypo_dmr_1994|11|0.414|0.778	0	.
chr1	24239337	24241320	P39_cKOvsControl_cKO_hypo_dmr_1995|35|0.176|0.798	0	.
chr1	24244862	24245086	P39_cKOvsControl_cKO_hypo_dmr_1997|11|0.267|0.795	0	.
chr1	24245669	24246949	P39_cKOvsControl_cKO_hypo_dmr_1998|49|0.317|0.861	0	.
chr1	24257530	24258351	P39_cKOvsControl_cKO_hypo_dmr_2002|12|0.453|0.801	0	.
chr1	24259353	24259637	P39_cKOvsControl_cKO_hypo_dmr_2003|3|0.535|0.878	0	.
chr1	24263049	24263290	P39_cKOvsControl_cKO_hypo_dmr_2005|5|0.381|0.860	0	.
chr1	24267254	24267501	P39_cKOvsControl_cKO_hypo_dmr_2008|8|0.074|0.781	0	.
chr1	24272850	24274043	P39_cKOvsControl_cKO_hypo_dmr_2009|25|0.394|0.849	0	.
chr1	24279755	24280433	P39_cKOvsControl_cKO_hypo_dmr_2010|7|0.209|0.560	0	.
chr1	24281033	24281736	P39_cKOvsControl_cKO_hypo_dmr_2011|8|0.430|0.801	0	.
chr1	24286025	24287021	P39_cKOvsControl_cKO_hypo_dmr_2012|14|0.486|0.826	0	.
chr1	24290213	24290501	P39_cKOvsControl_cKO_hypo_dmr_2013|7|0.516|0.887	0	.
chr1	24300373	24300588	P39_cKOvsControl_cKO_hypo_dmr_2017|5|0.383|0.746	0	.
chr1	24301814	24302415	P39_cKOvsControl_cKO_hypo_dmr_2018|15|0.223|0.679	0	.
chr1	24304476	24305855	P39_cKOvsControl_cKO_hypo_dmr_2019|21|0.480|0.804	0	.
chr1	24306628	24306902	P39_cKOvsControl_cKO_hypo_dmr_2020|3|0.572|0.887	0	.
chr1	24310064	24310674	P39_cKOvsControl_cKO_hypo_dmr_2021|14|0.383|0.782	0	.
chr1	24316701	24317742	P39_cKOvsControl_cKO_hypo_dmr_2023|15|0.474|0.823	0	.
chr1	24325906	24326158	P39_cKOvsControl_cKO_hypo_dmr_2025|5|0.333|0.822	0	.
chr1	24334107	24334291	P39_cKOvsControl_cKO_hypo_dmr_2027|4|0.215|0.641	0	.
chr1	24334847	24335827	P39_cKOvsControl_cKO_hypo_dmr_2028|15|0.393|0.817	0	.
chr1	24352668	24352759	P39_cKOvsControl_cKO_hypo_dmr_2030|3|0.582|0.942	0	.
chr1	24368153	24368566	P39_cKOvsControl_cKO_hypo_dmr_2035|14|0.093|0.423	0	.
chr1	24373367	24375140	P39_cKOvsControl_cKO_hypo_dmr_2036|21|0.511|0.816	0	.
chr1	24376910	24376935	P39_cKOvsControl_cKO_hypo_dmr_2037|3|0.452|0.890	0	.
chr1	24377634	24378426	P39_cKOvsControl_cKO_hypo_dmr_2038|10|0.163|0.536	0	.
chr1	24380592	24381635	P39_cKOvsControl_cKO_hypo_dmr_2040|9|0.304|0.643	0	.
chr1	24382747	24383694	P39_cKOvsControl_cKO_hypo_dmr_2041|19|0.131|0.516	0	.
chr1	24386788	24386868	P39_cKOvsControl_cKO_hypo_dmr_2042|4|0.107|0.667	0	.
chr1	24387493	24387668	P39_cKOvsControl_cKO_hypo_dmr_2043|5|0.486|0.813	0	.
chr1	24401987	24402754	P39_cKOvsControl_cKO_hypo_dmr_2045|8|0.496|0.802	0	.
chr1	24428558	24428596	P39_cKOvsControl_cKO_hypo_dmr_2048|3|0.422|0.910	0	.
chr1	24437376	24437409	P39_cKOvsControl_cKO_hypo_dmr_2049|3|0.519|0.877	0	.
chr1	24442253	24442302	P39_cKOvsControl_cKO_hypo_dmr_2050|6|0.198|0.705	0	.
chr1	24451929	24453354	P39_cKOvsControl_cKO_hypo_dmr_2051|18|0.135|0.448	0	.
chr1	24453992	24454351	P39_cKOvsControl_cKO_hypo_dmr_2052|9|0.100|0.638	0	.
chr1	24461157	24461610	P39_cKOvsControl_cKO_hypo_dmr_2053|5|0.411|0.737	0	.
chr1	24472887	24472938	P39_cKOvsControl_cKO_hypo_dmr_2056|4|0.391|0.886	0	.
chr1	24495604	24495743	P39_cKOvsControl_cKO_hypo_dmr_2059|5|0.090|0.504	0	.
chr1	24511521	24511853	P39_cKOvsControl_cKO_hypo_dmr_2062|8|0.529|0.894	0	.
chr1	24514930	24517743	P39_cKOvsControl_cKO_hypo_dmr_2064|37|0.418|0.780	0	.
chr1	24532185	24532754	P39_cKOvsControl_cKO_hypo_dmr_2071|8|0.314|0.745	0	.
chr1	24538876	24539858	P39_cKOvsControl_cKO_hypo_dmr_2072|8|0.272|0.632	0	.
chr1	24549765	24551226	P39_cKOvsControl_cKO_hypo_dmr_2074|46|0.486|0.886	0	.
chr1	24561634	24563533	P39_cKOvsControl_cKO_hypo_dmr_2077|27|0.394|0.781	0	.
chr1	24564035	24565104	P39_cKOvsControl_cKO_hypo_dmr_2078|7|0.364|0.726	0	.
chr1	24566120	24566471	P39_cKOvsControl_cKO_hypo_dmr_2079|9|0.410|0.789	0	.
chr1	24582326	24584185	P39_cKOvsControl_cKO_hypo_dmr_2082|17|0.536|0.853	0	.
chr1	24588284	24588675	P39_cKOvsControl_cKO_hypo_dmr_2084|9|0.167|0.576	0	.
chr1	24589234	24591397	P39_cKOvsControl_cKO_hypo_dmr_2085|28|0.469|0.784	0	.
chr1	24667695	24668349	P39_cKOvsControl_cKO_hypo_dmr_2091|11|0.308|0.734	0	.
chr1	24686383	24686581	P39_cKOvsControl_cKO_hypo_dmr_2092|5|0.097|0.548	0	.
chr1	24704782	24704883	P39_cKOvsControl_cKO_hypo_dmr_2096|3|0.332|0.676	0	.
chr1	24705990	24706040	P39_cKOvsControl_cKO_hypo_dmr_2097|5|0.269|0.667	0	.
chr1	24710285	24710503	P39_cKOvsControl_cKO_hypo_dmr_2098|3|0.383|0.699	0	.
chr1	24758680	24759417	P39_cKOvsControl_cKO_hypo_dmr_2102|21|0.156|0.489	0	.
chr1	24759947	24762102	P39_cKOvsControl_cKO_hypo_dmr_2103|45|0.184|0.587	0	.
chr1	24774030	24774044	P39_cKOvsControl_cKO_hypo_dmr_2106|4|0.060|0.433	0	.
chr1	24778599	24778850	P39_cKOvsControl_cKO_hypo_dmr_2107|3|0.333|0.710	0	.
chr1	24786594	24786815	P39_cKOvsControl_cKO_hypo_dmr_2109|4|0.083|0.457	0	.
chr1	24791399	24791774	P39_cKOvsControl_cKO_hypo_dmr_2110|4|0.336|0.644	0	.
chr1	24814974	24815486	P39_cKOvsControl_cKO_hypo_dmr_2112|15|0.232|0.866	0	.
chr1	24818339	24818767	P39_cKOvsControl_cKO_hypo_dmr_2113|6|0.341|0.690	0	.
chr1	24820085	24820885	P39_cKOvsControl_cKO_hypo_dmr_2114|12|0.389|0.751	0	.
chr1	24830483	24830544	P39_cKOvsControl_cKO_hypo_dmr_2116|4|0.446|0.825	0	.
chr1	24831582	24832974	P39_cKOvsControl_cKO_hypo_dmr_2117|13|0.174|0.681	0	.
chr1	24836442	24836699	P39_cKOvsControl_cKO_hypo_dmr_2118|3|0.428|0.784	0	.
chr1	24870558	24870960	P39_cKOvsControl_cKO_hypo_dmr_2123|8|0.420|0.755	0	.
chr1	24873483	24873963	P39_cKOvsControl_cKO_hypo_dmr_2124|5|0.317|0.646	0	.
chr1	24884295	24884328	P39_cKOvsControl_cKO_hypo_dmr_2125|4|0.139|0.729	0	.
chr1	24937607	24937695	P39_cKOvsControl_cKO_hypo_dmr_2129|4|0.102|0.881	0	.
chr1	24938343	24938584	P39_cKOvsControl_cKO_hypo_dmr_2130|6|0.000|0.678	0	.
chr1	24941403	24941520	P39_cKOvsControl_cKO_hypo_dmr_2133|5|0.325|0.726	0	.
chr1	24951645	24952137	P39_cKOvsControl_cKO_hypo_dmr_2135|7|0.448|0.794	0	.
chr1	24962098	24962320	P39_cKOvsControl_cKO_hypo_dmr_2136|3|0.333|0.685	0	.
chr1	24971562	24971589	P39_cKOvsControl_cKO_hypo_dmr_2137|3|0.521|0.903	0	.
chr1	24996646	24996703	P39_cKOvsControl_cKO_hypo_dmr_2138|4|0.176|0.777	0	.
chr1	25009043	25009275	P39_cKOvsControl_cKO_hypo_dmr_2139|5|0.110|0.617	0	.
chr1	25013373	25014173	P39_cKOvsControl_cKO_hypo_dmr_2140|16|0.561|0.882	0	.
chr1	25036863	25037121	P39_cKOvsControl_cKO_hypo_dmr_2143|4|0.337|0.737	0	.
chr1	25096529	25097200	P39_cKOvsControl_cKO_hypo_dmr_2147|5|0.235|0.559	0	.
chr1	25102114	25102859	P39_cKOvsControl_cKO_hypo_dmr_2148|14|0.248|0.554	0	.
chr1	25184193	25184354	P39_cKOvsControl_cKO_hypo_dmr_2153|4|0.024|0.431	0	.
chr1	25191994	25192299	P39_cKOvsControl_cKO_hypo_dmr_2154|12|0.164|0.542	0	.
chr1	25204545	25204964	P39_cKOvsControl_cKO_hypo_dmr_2155|7|0.238|0.547	0	.
chr1	25232895	25232954	P39_cKOvsControl_cKO_hypo_dmr_2157|4|0.235|0.750	0	.
chr1	25242491	25243191	P39_cKOvsControl_cKO_hypo_dmr_2158|11|0.316|0.706	0	.
chr1	25243894	25243915	P39_cKOvsControl_cKO_hypo_dmr_2159|3|0.154|0.530	0	.
chr1	25276949	25277012	P39_cKOvsControl_cKO_hypo_dmr_2160|6|0.509|0.846	0	.
chr1	25307935	25308362	P39_cKOvsControl_cKO_hypo_dmr_2162|7|0.337|0.715	0	.
chr1	25310165	25310687	P39_cKOvsControl_cKO_hypo_dmr_2163|5|0.261|0.574	0	.
chr1	25336513	25336560	P39_cKOvsControl_cKO_hypo_dmr_2164|3|0.391|0.778	0	.
chr1	25396620	25396758	P39_cKOvsControl_cKO_hypo_dmr_2167|4|0.150|0.514	0	.
chr1	25399936	25400009	P39_cKOvsControl_cKO_hypo_dmr_2168|4|0.310|0.702	0	.
chr1	25401126	25401411	P39_cKOvsControl_cKO_hypo_dmr_2169|4|0.336|0.672	0	.
chr1	25421109	25421229	P39_cKOvsControl_cKO_hypo_dmr_2172|6|0.106|0.420	0	.
chr1	25424555	25424646	P39_cKOvsControl_cKO_hypo_dmr_2173|4|0.342|0.737	0	.
chr1	25430413	25431465	P39_cKOvsControl_cKO_hypo_dmr_2174|20|0.281|0.618	0	.
chr1	25432509	25432573	P39_cKOvsControl_cKO_hypo_dmr_2175|5|0.205|0.548	0	.
chr1	25463349	25463877	P39_cKOvsControl_cKO_hypo_dmr_2177|6|0.415|0.756	0	.
chr1	25474584	25474751	P39_cKOvsControl_cKO_hypo_dmr_2178|7|0.103|0.508	0	.
chr1	25537126	25537443	P39_cKOvsControl_cKO_hypo_dmr_2180|5|0.364|0.758	0	.
chr1	25553869	25554239	P39_cKOvsControl_cKO_hypo_dmr_2182|5|0.168|0.490	0	.
chr1	25588042	25588805	P39_cKOvsControl_cKO_hypo_dmr_2183|15|0.065|0.514	0	.
chr1	25639458	25639479	P39_cKOvsControl_cKO_hypo_dmr_2186|3|0.082|0.386	0	.
chr1	25645672	25645681	P39_cKOvsControl_cKO_hypo_dmr_2187|4|0.130|0.475	0	.
chr1	25685977	25686262	P39_cKOvsControl_cKO_hypo_dmr_2188|3|0.042|0.388	0	.
chr1	25697339	25698041	P39_cKOvsControl_cKO_hypo_dmr_2189|6|0.038|0.360	0	.
chr1	25703685	25703901	P39_cKOvsControl_cKO_hypo_dmr_2191|6|0.123|0.566	0	.
chr1	25708262	25708282	P39_cKOvsControl_cKO_hypo_dmr_2192|3|0.135|0.603	0	.
chr1	25777612	25778128	P39_cKOvsControl_cKO_hypo_dmr_2197|6|0.294|0.614	0	.
chr1	25811552	25812556	P39_cKOvsControl_cKO_hypo_dmr_2198|14|0.180|0.510	0	.
chr1	25854677	25854755	P39_cKOvsControl_cKO_hypo_dmr_2199|4|0.028|0.544	0	.
chr1	25891834	25894141	P39_cKOvsControl_cKO_hypo_dmr_2202|26|0.100|0.444	0	.
chr1	25920113	25920525	P39_cKOvsControl_cKO_hypo_dmr_2204|3|0.325|0.752	0	.
chr1	25938251	25938740	P39_cKOvsControl_cKO_hypo_dmr_2207|6|0.261|0.618	0	.
chr1	25974496	25974917	P39_cKOvsControl_cKO_hypo_dmr_2209|7|0.121|0.567	0	.
chr1	25977650	25978128	P39_cKOvsControl_cKO_hypo_dmr_2210|4|0.267|0.595	0	.
chr1	26051979	26052273	P39_cKOvsControl_cKO_hypo_dmr_2211|5|0.211|0.716	0	.
chr1	26153738	26154081	P39_cKOvsControl_cKO_hypo_dmr_2212|4|0.500|0.837	0	.
chr1	26187889	26188170	P39_cKOvsControl_cKO_hypo_dmr_2214|5|0.429|0.737	0	.
chr1	26195986	26196020	P39_cKOvsControl_cKO_hypo_dmr_2215|4|0.194|0.675	0	.
chr1	26205677	26205842	P39_cKOvsControl_cKO_hypo_dmr_2216|3|0.528|0.830	0	.
chr1	26279915	26279968	P39_cKOvsControl_cKO_hypo_dmr_2219|3|0.389|0.895	0	.
chr1	26281270	26281278	P39_cKOvsControl_cKO_hypo_dmr_2220|4|0.182|0.598	0	.
chr1	26288436	26288446	P39_cKOvsControl_cKO_hypo_dmr_2221|3|0.262|0.725	0	.
chr1	26295725	26295920	P39_cKOvsControl_cKO_hypo_dmr_2223|4|0.401|0.798	0	.
chr1	26308001	26308299	P39_cKOvsControl_cKO_hypo_dmr_2224|3|0.441|0.786	0	.
chr1	26355519	26356896	P39_cKOvsControl_cKO_hypo_dmr_2225|13|0.497|0.826	0	.
chr1	26387962	26389261	P39_cKOvsControl_cKO_hypo_dmr_2226|24|0.013|0.575	0	.
chr1	26395846	26396561	P39_cKOvsControl_cKO_hypo_dmr_2227|8|0.342|0.721	0	.
chr1	26507820	26508220	P39_cKOvsControl_cKO_hypo_dmr_2230|8|0.074|0.589	0	.
chr1	26511383	26511847	P39_cKOvsControl_cKO_hypo_dmr_2231|4|0.328|0.773	0	.
chr1	26598036	26598294	P39_cKOvsControl_cKO_hypo_dmr_2233|4|0.198|0.643	0	.
chr1	26631028	26631917	P39_cKOvsControl_cKO_hypo_dmr_2235|9|0.307|0.707	0	.
chr1	26649689	26650091	P39_cKOvsControl_cKO_hypo_dmr_2237|3|0.340|0.807	0	.
chr1	26650692	26650934	P39_cKOvsControl_cKO_hypo_dmr_2238|7|0.475|0.859	0	.
chr1	26682299	26682315	P39_cKOvsControl_cKO_hypo_dmr_2239|4|0.644|0.986	0	.
chr1	26735857	26736000	P39_cKOvsControl_cKO_hypo_dmr_2240|4|0.550|0.875	0	.
chr1	26757615	26757728	P39_cKOvsControl_cKO_hypo_dmr_2241|4|0.125|0.634	0	.
chr1	26762514	26762576	P39_cKOvsControl_cKO_hypo_dmr_2242|4|0.338|0.888	0	.
chr1	26765251	26765731	P39_cKOvsControl_cKO_hypo_dmr_2243|12|0.176|0.496	0	.
chr1	26823558	26823662	P39_cKOvsControl_cKO_hypo_dmr_2244|3|0.491|0.821	0	.
chr1	26862401	26862693	P39_cKOvsControl_cKO_hypo_dmr_2245|5|0.466|0.791	0	.
chr1	26863929	26864370	P39_cKOvsControl_cKO_hypo_dmr_2246|9|0.150|0.560	0	.
chr1	26900475	26900558	P39_cKOvsControl_cKO_hypo_dmr_2247|4|0.393|0.903	0	.
chr1	26922911	26922917	P39_cKOvsControl_cKO_hypo_dmr_2248|3|0.448|0.824	0	.
chr1	26924171	26925106	P39_cKOvsControl_cKO_hypo_dmr_2249|10|0.431|0.732	0	.
chr1	27082193	27082461	P39_cKOvsControl_cKO_hypo_dmr_2250|7|0.252|0.680	0	.
chr1	27169444	27169498	P39_cKOvsControl_cKO_hypo_dmr_2252|4|0.106|0.493	0	.
chr1	27289393	27289735	P39_cKOvsControl_cKO_hypo_dmr_2256|3|0.375|0.729	0	.
chr1	27465241	27465329	P39_cKOvsControl_cKO_hypo_dmr_2258|3|0.327|0.758	0	.
chr1	27468081	27468222	P39_cKOvsControl_cKO_hypo_dmr_2259|5|0.277|0.821	0	.
chr1	27480849	27480856	P39_cKOvsControl_cKO_hypo_dmr_2260|3|0.229|0.608	0	.
chr1	27507157	27507216	P39_cKOvsControl_cKO_hypo_dmr_2264|3|0.196|0.605	0	.
chr1	27628233	27628284	P39_cKOvsControl_cKO_hypo_dmr_2266|3|0.457|0.840	0	.
chr1	27671634	27671703	P39_cKOvsControl_cKO_hypo_dmr_2267|3|0.172|0.790	0	.
chr1	27707038	27707467	P39_cKOvsControl_cKO_hypo_dmr_2270|3|0.396|0.720	0	.
chr1	27745305	27745326	P39_cKOvsControl_cKO_hypo_dmr_2271|4|0.100|0.642	0	.
chr1	27821655	27821762	P39_cKOvsControl_cKO_hypo_dmr_2274|3|0.215|0.655	0	.
chr1	27874445	27874562	P39_cKOvsControl_cKO_hypo_dmr_2278|3|0.175|0.584	0	.
chr1	27879804	27880073	P39_cKOvsControl_cKO_hypo_dmr_2279|4|0.491|0.814	0	.
chr1	27887268	27887839	P39_cKOvsControl_cKO_hypo_dmr_2281|7|0.251|0.554	0	.
chr1	27889685	27889975	P39_cKOvsControl_cKO_hypo_dmr_2282|3|0.236|0.543	0	.
chr1	27897311	27897514	P39_cKOvsControl_cKO_hypo_dmr_2283|5|0.438|0.752	0	.
chr1	27964724	27964795	P39_cKOvsControl_cKO_hypo_dmr_2284|4|0.558|0.867	0	.
chr1	27966358	27966367	P39_cKOvsControl_cKO_hypo_dmr_2285|3|0.300|0.634	0	.
chr1	27987245	27987436	P39_cKOvsControl_cKO_hypo_dmr_2287|3|0.274|0.652	0	.
chr1	28016130	28016433	P39_cKOvsControl_cKO_hypo_dmr_2289|9|0.050|0.414	0	.
chr1	28031138	28031439	P39_cKOvsControl_cKO_hypo_dmr_2291|4|0.363|0.681	0	.
chr1	28047297	28047374	P39_cKOvsControl_cKO_hypo_dmr_2292|4|0.182|0.561	0	.
chr1	28091087	28091380	P39_cKOvsControl_cKO_hypo_dmr_2295|4|0.314|0.799	0	.
chr1	28092283	28092515	P39_cKOvsControl_cKO_hypo_dmr_2296|3|0.285|0.751	0	.
chr1	28131901	28132048	P39_cKOvsControl_cKO_hypo_dmr_2297|5|0.453|0.854	0	.
chr1	28211362	28211748	P39_cKOvsControl_cKO_hypo_dmr_2301|3|0.275|0.584	0	.
chr1	28274534	28274930	P39_cKOvsControl_cKO_hypo_dmr_2303|6|0.307|0.623	0	.
chr1	28323120	28323216	P39_cKOvsControl_cKO_hypo_dmr_2304|3|0.358|0.870	0	.
chr1	28413070	28413490	P39_cKOvsControl_cKO_hypo_dmr_2306|3|0.174|0.524	0	.
chr1	28421582	28421790	P39_cKOvsControl_cKO_hypo_dmr_2307|5|0.169|0.562	0	.
chr1	28433737	28434079	P39_cKOvsControl_cKO_hypo_dmr_2308|3|0.491|0.809	0	.
chr1	28439081	28439364	P39_cKOvsControl_cKO_hypo_dmr_2310|7|0.311|0.723	0	.
chr1	28487453	28487462	P39_cKOvsControl_cKO_hypo_dmr_2312|4|0.379|0.933	0	.
chr1	28593913	28594461	P39_cKOvsControl_cKO_hypo_dmr_2316|10|0.215|0.590	0	.
chr1	28596882	28597134	P39_cKOvsControl_cKO_hypo_dmr_2318|8|0.147|0.630	0	.
chr1	28637197	28637482	P39_cKOvsControl_cKO_hypo_dmr_2319|4|0.248|0.598	0	.
chr1	28640905	28641383	P39_cKOvsControl_cKO_hypo_dmr_2320|13|0.161|0.663	0	.
chr1	28642346	28642740	P39_cKOvsControl_cKO_hypo_dmr_2321|3|0.283|0.609	0	.
chr1	28712221	28712467	P39_cKOvsControl_cKO_hypo_dmr_2323|4|0.342|0.812	0	.
chr1	28752847	28753117	P39_cKOvsControl_cKO_hypo_dmr_2325|4|0.368|0.686	0	.
chr1	28766282	28766349	P39_cKOvsControl_cKO_hypo_dmr_2326|4|0.219|0.568	0	.
chr1	28785721	28786065	P39_cKOvsControl_cKO_hypo_dmr_2327|5|0.317|0.725	0	.
chr1	28792165	28792708	P39_cKOvsControl_cKO_hypo_dmr_2328|7|0.421|0.742	0	.
chr1	28803235	28803328	P39_cKOvsControl_cKO_hypo_dmr_2330|3|0.445|0.898	0	.
chr1	28877660	28877830	P39_cKOvsControl_cKO_hypo_dmr_2334|5|0.193|0.757	0	.
chr1	28884537	28884674	P39_cKOvsControl_cKO_hypo_dmr_2335|4|0.262|0.632	0	.
chr1	28897476	28897796	P39_cKOvsControl_cKO_hypo_dmr_2336|7|0.379|0.697	0	.
chr1	28901705	28901776	P39_cKOvsControl_cKO_hypo_dmr_2337|4|0.427|0.731	0	.
chr1	28987691	28987931	P39_cKOvsControl_cKO_hypo_dmr_2339|5|0.174|0.586	0	.
chr1	29013812	29014427	P39_cKOvsControl_cKO_hypo_dmr_2340|10|0.289|0.748	0	.
chr1	29063655	29064174	P39_cKOvsControl_cKO_hypo_dmr_2345|6|0.440|0.766	0	.
chr1	29155618	29155798	P39_cKOvsControl_cKO_hypo_dmr_2346|4|0.228|0.763	0	.
chr1	29208542	29208616	P39_cKOvsControl_cKO_hypo_dmr_2347|3|0.142|0.703	0	.
chr1	29217416	29217743	P39_cKOvsControl_cKO_hypo_dmr_2349|9|0.189|0.701	0	.
chr1	29261331	29261625	P39_cKOvsControl_cKO_hypo_dmr_2351|5|0.331|0.662	0	.
chr1	29330077	29330153	P39_cKOvsControl_cKO_hypo_dmr_2353|5|0.342|0.843	0	.
chr1	29355474	29356208	P39_cKOvsControl_cKO_hypo_dmr_2354|10|0.362|0.730	0	.
chr1	29386251	29386658	P39_cKOvsControl_cKO_hypo_dmr_2355|5|0.230|0.639	0	.
chr1	29404328	29404633	P39_cKOvsControl_cKO_hypo_dmr_2356|5|0.256|0.652	0	.
chr1	29405844	29406218	P39_cKOvsControl_cKO_hypo_dmr_2357|7|0.115|0.421	0	.
chr1	29491082	29491321	P39_cKOvsControl_cKO_hypo_dmr_2358|3|0.453|0.802	0	.
chr1	29509640	29509920	P39_cKOvsControl_cKO_hypo_dmr_2359|5|0.048|0.412	0	.
chr1	29687310	29687414	P39_cKOvsControl_cKO_hypo_dmr_2361|4|0.476|0.852	0	.
chr1	29691948	29692542	P39_cKOvsControl_cKO_hypo_dmr_2363|6|0.130|0.568	0	.
chr1	29823533	29823579	P39_cKOvsControl_cKO_hypo_dmr_2365|3|0.108|0.484	0	.
chr1	29883749	29884037	P39_cKOvsControl_cKO_hypo_dmr_2367|3|0.390|0.726	0	.
chr1	29906246	29906290	P39_cKOvsControl_cKO_hypo_dmr_2368|3|0.596|0.961	0	.
chr1	29931660	29931841	P39_cKOvsControl_cKO_hypo_dmr_2369|3|0.412|0.717	0	.
chr1	30008904	30009569	P39_cKOvsControl_cKO_hypo_dmr_2371|6|0.121|0.618	0	.
chr1	30035182	30035275	P39_cKOvsControl_cKO_hypo_dmr_2372|3|0.495|0.852	0	.
chr1	30060734	30061316	P39_cKOvsControl_cKO_hypo_dmr_2373|5|0.117|0.490	0	.
chr1	30061867	30062101	P39_cKOvsControl_cKO_hypo_dmr_2374|3|0.289|0.698	0	.
chr1	30138035	30138104	P39_cKOvsControl_cKO_hypo_dmr_2377|3|0.316|0.709	0	.
chr1	30142958	30143281	P39_cKOvsControl_cKO_hypo_dmr_2379|5|0.412|0.825	0	.
chr1	30175974	30176480	P39_cKOvsControl_cKO_hypo_dmr_2381|8|0.355|0.828	0	.
chr1	30204380	30204688	P39_cKOvsControl_cKO_hypo_dmr_2382|5|0.131|0.434	0	.
chr1	30205565	30205632	P39_cKOvsControl_cKO_hypo_dmr_2383|3|0.199|0.631	0	.
chr1	30318139	30318578	P39_cKOvsControl_cKO_hypo_dmr_2388|14|0.339|0.802	0	.
chr1	30342132	30342664	P39_cKOvsControl_cKO_hypo_dmr_2390|4|0.268|0.680	0	.
chr1	30343586	30343840	P39_cKOvsControl_cKO_hypo_dmr_2391|6|0.232|0.615	0	.
chr1	30350164	30350294	P39_cKOvsControl_cKO_hypo_dmr_2392|4|0.305|0.636	0	.
chr1	30499483	30499672	P39_cKOvsControl_cKO_hypo_dmr_2397|3|0.454|0.767	0	.
chr1	30518795	30519717	P39_cKOvsControl_cKO_hypo_dmr_2398|11|0.414|0.810	0	.
chr1	30535835	30538329	P39_cKOvsControl_cKO_hypo_dmr_2399|38|0.507|0.850	0	.
chr1	30548719	30548901	P39_cKOvsControl_cKO_hypo_dmr_2400|12|0.047|0.853	0	.
chr1	30551634	30551999	P39_cKOvsControl_cKO_hypo_dmr_2402|3|0.543|0.849	0	.
chr1	30554018	30555456	P39_cKOvsControl_cKO_hypo_dmr_2403|12|0.182|0.503	0	.
chr1	30572684	30573054	P39_cKOvsControl_cKO_hypo_dmr_2405|10|0.195|0.598	0	.
chr1	30576705	30577093	P39_cKOvsControl_cKO_hypo_dmr_2406|3|0.549|0.890	0	.
chr1	30582856	30584381	P39_cKOvsControl_cKO_hypo_dmr_2407|20|0.429|0.814	0	.
chr1	30585269	30586071	P39_cKOvsControl_cKO_hypo_dmr_2408|14|0.187|0.580	0	.
chr1	30593392	30593775	P39_cKOvsControl_cKO_hypo_dmr_2409|4|0.307|0.617	0	.
chr1	30595638	30595836	P39_cKOvsControl_cKO_hypo_dmr_2411|8|0.032|0.360	0	.
chr1	30602760	30603114	P39_cKOvsControl_cKO_hypo_dmr_2412|3|0.336|0.733	0	.
chr1	30633707	30634310	P39_cKOvsControl_cKO_hypo_dmr_2415|8|0.252|0.640	0	.
chr1	30638301	30641178	P39_cKOvsControl_cKO_hypo_dmr_2417|42|0.560|0.870	0	.
chr1	30678075	30678230	P39_cKOvsControl_cKO_hypo_dmr_2419|8|0.220|0.743	0	.
chr1	30683111	30683683	P39_cKOvsControl_cKO_hypo_dmr_2421|6|0.462|0.804	0	.
chr1	30707094	30707114	P39_cKOvsControl_cKO_hypo_dmr_2423|3|0.385|0.727	0	.
chr1	30721720	30721856	P39_cKOvsControl_cKO_hypo_dmr_2425|3|0.099|0.451	0	.
chr1	30772910	30773116	P39_cKOvsControl_cKO_hypo_dmr_2426|11|0.443|0.877	0	.
chr1	30777076	30777181	P39_cKOvsControl_cKO_hypo_dmr_2427|5|0.396|0.796	0	.
chr1	30777738	30777959	P39_cKOvsControl_cKO_hypo_dmr_2428|5|0.501|0.889	0	.
chr1	30785774	30785955	P39_cKOvsControl_cKO_hypo_dmr_2430|3|0.286|0.733	0	.
chr1	30789284	30789480	P39_cKOvsControl_cKO_hypo_dmr_2432|4|0.251|0.609	0	.
chr1	30846015	30846058	P39_cKOvsControl_cKO_hypo_dmr_2433|4|0.200|0.661	0	.
chr1	30931942	30932004	P39_cKOvsControl_cKO_hypo_dmr_2435|3|0.216|0.674	0	.
chr1	30992750	30993128	P39_cKOvsControl_cKO_hypo_dmr_2437|3|0.440|0.759	0	.
chr1	30996761	30996845	P39_cKOvsControl_cKO_hypo_dmr_2438|3|0.206|0.514	0	.
chr1	31013861	31014812	P39_cKOvsControl_cKO_hypo_dmr_2440|11|0.201|0.754	0	.
chr1	31018813	31019143	P39_cKOvsControl_cKO_hypo_dmr_2441|3|0.479|0.798	0	.
chr1	31051197	31052029	P39_cKOvsControl_cKO_hypo_dmr_2445|9|0.453|0.832	0	.
chr1	31057225	31057424	P39_cKOvsControl_cKO_hypo_dmr_2446|5|0.090|0.393	0	.
chr1	31064339	31064426	P39_cKOvsControl_cKO_hypo_dmr_2448|5|0.244|0.800	0	.
chr1	31071162	31071370	P39_cKOvsControl_cKO_hypo_dmr_2449|6|0.363|0.762	0	.
chr1	31083314	31083468	P39_cKOvsControl_cKO_hypo_dmr_2450|4|0.502|0.866	0	.
chr1	31093841	31093990	P39_cKOvsControl_cKO_hypo_dmr_2452|4|0.130|0.604	0	.
chr1	31102275	31103236	P39_cKOvsControl_cKO_hypo_dmr_2454|7|0.310|0.616	0	.
chr1	31154783	31155221	P39_cKOvsControl_cKO_hypo_dmr_2456|6|0.497|0.830	0	.
chr1	31176125	31176423	P39_cKOvsControl_cKO_hypo_dmr_2460|3|0.335|0.812	0	.
chr1	31184515	31184909	P39_cKOvsControl_cKO_hypo_dmr_2461|4|0.422|0.749	0	.
chr1	31195382	31195602	P39_cKOvsControl_cKO_hypo_dmr_2464|6|0.259|0.708	0	.
chr1	31196933	31197128	P39_cKOvsControl_cKO_hypo_dmr_2465|5|0.118|0.422	0	.
chr1	31205285	31206074	P39_cKOvsControl_cKO_hypo_dmr_2469|15|0.043|0.382	0	.
chr1	31208651	31209413	P39_cKOvsControl_cKO_hypo_dmr_2470|10|0.552|0.863	0	.
chr1	31214166	31215150	P39_cKOvsControl_cKO_hypo_dmr_2471|12|0.522|0.868	0	.
chr1	31216613	31216644	P39_cKOvsControl_cKO_hypo_dmr_2472|4|0.275|0.836	0	.
chr1	31218919	31220122	P39_cKOvsControl_cKO_hypo_dmr_2473|21|0.168|0.582	0	.
chr1	31232208	31233317	P39_cKOvsControl_cKO_hypo_dmr_2474|14|0.408|0.827	0	.
chr1	31234088	31234274	P39_cKOvsControl_cKO_hypo_dmr_2475|5|0.284|0.795	0	.
chr1	31252685	31252785	P39_cKOvsControl_cKO_hypo_dmr_2476|6|0.232|0.658	0	.
chr1	31345167	31345249	P39_cKOvsControl_cKO_hypo_dmr_2480|3|0.487|0.855	0	.
chr1	31382323	31382687	P39_cKOvsControl_cKO_hypo_dmr_2482|5|0.333|0.728	0	.
chr1	31422821	31423065	P39_cKOvsControl_cKO_hypo_dmr_2483|3|0.483|0.815	0	.
chr1	31443198	31443461	P39_cKOvsControl_cKO_hypo_dmr_2485|4|0.106|0.494	0	.
chr1	31452492	31453278	P39_cKOvsControl_cKO_hypo_dmr_2487|8|0.109|0.653	0	.
chr1	31462101	31462787	P39_cKOvsControl_cKO_hypo_dmr_2488|10|0.015|0.343	0	.
chr1	31507743	31507975	P39_cKOvsControl_cKO_hypo_dmr_2489|3|0.434|0.757	0	.
chr1	31595340	31596197	P39_cKOvsControl_cKO_hypo_dmr_2492|7|0.374|0.684	0	.
chr1	31611282	31611342	P39_cKOvsControl_cKO_hypo_dmr_2493|5|0.461|0.819	0	.
chr1	31633568	31633674	P39_cKOvsControl_cKO_hypo_dmr_2496|3|0.261|0.657	0	.
chr1	31637223	31637757	P39_cKOvsControl_cKO_hypo_dmr_2497|6|0.065|0.681	0	.
chr1	31638857	31638937	P39_cKOvsControl_cKO_hypo_dmr_2498|3|0.537|0.897	0	.
chr1	31640061	31640794	P39_cKOvsControl_cKO_hypo_dmr_2499|12|0.109|0.657	0	.
chr1	31865717	31866001	P39_cKOvsControl_cKO_hypo_dmr_2502|4|0.395|0.740	0	.
chr1	32127540	32127770	P39_cKOvsControl_cKO_hypo_dmr_2507|6|0.313|0.738	0	.
chr1	32182510	32182547	P39_cKOvsControl_cKO_hypo_dmr_2511|3|0.328|0.899	0	.
chr1	32186340	32187007	P39_cKOvsControl_cKO_hypo_dmr_2512|8|0.358|0.691	0	.
chr1	32192344	32192962	P39_cKOvsControl_cKO_hypo_dmr_2513|7|0.293|0.746	0	.
chr1	32195805	32196900	P39_cKOvsControl_cKO_hypo_dmr_2514|7|0.330|0.671	0	.
chr1	32220978	32220986	P39_cKOvsControl_cKO_hypo_dmr_2516|3|0.077|0.509	0	.
chr1	32240268	32240807	P39_cKOvsControl_cKO_hypo_dmr_2517|5|0.308|0.610	0	.
chr1	32241321	32241419	P39_cKOvsControl_cKO_hypo_dmr_2518|4|0.060|0.468	0	.
chr1	32245115	32245463	P39_cKOvsControl_cKO_hypo_dmr_2519|3|0.382|0.694	0	.
chr1	32287594	32287673	P39_cKOvsControl_cKO_hypo_dmr_2521|3|0.232|0.559	0	.
chr1	32290779	32292160	P39_cKOvsControl_cKO_hypo_dmr_2522|13|0.236|0.645	0	.
chr1	32308975	32309595	P39_cKOvsControl_cKO_hypo_dmr_2523|9|0.277|0.682	0	.
chr1	32329941	32329973	P39_cKOvsControl_cKO_hypo_dmr_2525|3|0.368|0.802	0	.
chr1	32332181	32332202	P39_cKOvsControl_cKO_hypo_dmr_2526|3|0.343|0.795	0	.
chr1	32337255	32337281	P39_cKOvsControl_cKO_hypo_dmr_2527|4|0.120|0.587	0	.
chr1	32344585	32344672	P39_cKOvsControl_cKO_hypo_dmr_2528|3|0.504|0.847	0	.
chr1	32407776	32408607	P39_cKOvsControl_cKO_hypo_dmr_2530|7|0.233|0.663	0	.
chr1	32452462	32453055	P39_cKOvsControl_cKO_hypo_dmr_2532|6|0.286|0.606	0	.
chr1	32457126	32457417	P39_cKOvsControl_cKO_hypo_dmr_2533|3|0.236|0.578	0	.
chr1	32467302	32467454	P39_cKOvsControl_cKO_hypo_dmr_2534|6|0.366|0.709	0	.
chr1	32492907	32493640	P39_cKOvsControl_cKO_hypo_dmr_2536|6|0.279|0.651	0	.
chr1	32540751	32540850	P39_cKOvsControl_cKO_hypo_dmr_2539|4|0.647|0.950	0	.
chr1	32564710	32565668	P39_cKOvsControl_cKO_hypo_dmr_2542|12|0.312|0.634	0	.
chr1	32566819	32567291	P39_cKOvsControl_cKO_hypo_dmr_2543|5|0.437|0.773	0	.
chr1	32568296	32568361	P39_cKOvsControl_cKO_hypo_dmr_2544|4|0.402|0.882	0	.
chr1	32569194	32569392	P39_cKOvsControl_cKO_hypo_dmr_2545|4|0.262|0.676	0	.
chr1	32570814	32570864	P39_cKOvsControl_cKO_hypo_dmr_2546|3|0.554|0.879	0	.
chr1	32581891	32581914	P39_cKOvsControl_cKO_hypo_dmr_2548|3|0.348|0.809	0	.
chr1	32617973	32618084	P39_cKOvsControl_cKO_hypo_dmr_2550|4|0.057|0.531	0	.
chr1	32625489	32625984	P39_cKOvsControl_cKO_hypo_dmr_2551|8|0.039|0.447	0	.
chr1	32649947	32650069	P39_cKOvsControl_cKO_hypo_dmr_2553|3|0.372|0.745	0	.
chr1	32692924	32694070	P39_cKOvsControl_cKO_hypo_dmr_2555|32|0.370|0.716	0	.
chr1	32700895	32701626	P39_cKOvsControl_cKO_hypo_dmr_2556|8|0.219|0.528	0	.
chr1	32704763	32704937	P39_cKOvsControl_cKO_hypo_dmr_2557|6|0.545|0.887	0	.
chr1	32706542	32706750	P39_cKOvsControl_cKO_hypo_dmr_2558|6|0.344|0.745	0	.
chr1	32708474	32708747	P39_cKOvsControl_cKO_hypo_dmr_2559|4|0.254|0.682	0	.
chr1	32711224	32711507	P39_cKOvsControl_cKO_hypo_dmr_2560|5|0.297|0.747	0	.
chr1	32740548	32740697	P39_cKOvsControl_cKO_hypo_dmr_2562|4|0.404|0.714	0	.
chr1	32768343	32768354	P39_cKOvsControl_cKO_hypo_dmr_2564|3|0.109|0.582	0	.
chr1	32805891	32806894	P39_cKOvsControl_cKO_hypo_dmr_2565|8|0.273|0.672	0	.
chr1	32831963	32832505	P39_cKOvsControl_cKO_hypo_dmr_2568|9|0.421|0.820	0	.
chr1	32836501	32836708	P39_cKOvsControl_cKO_hypo_dmr_2569|7|0.241|0.829	0	.
chr1	32857570	32857651	P39_cKOvsControl_cKO_hypo_dmr_2572|4|0.409|0.888	0	.
chr1	32858352	32858457	P39_cKOvsControl_cKO_hypo_dmr_2573|3|0.503|0.810	0	.
chr1	32859417	32860216	P39_cKOvsControl_cKO_hypo_dmr_2574|8|0.223|0.621	0	.
chr1	32865312	32865534	P39_cKOvsControl_cKO_hypo_dmr_2575|3|0.341|0.685	0	.
chr1	32866382	32866868	P39_cKOvsControl_cKO_hypo_dmr_2576|3|0.446|0.752	0	.
chr1	32867405	32867489	P39_cKOvsControl_cKO_hypo_dmr_2577|3|0.274|0.773	0	.
chr1	32876756	32876842	P39_cKOvsControl_cKO_hypo_dmr_2579|4|0.239|0.675	0	.
chr1	32877369	32877606	P39_cKOvsControl_cKO_hypo_dmr_2580|9|0.322|0.710	0	.
chr1	32900474	32900739	P39_cKOvsControl_cKO_hypo_dmr_2581|7|0.472|0.838	0	.
chr1	32901375	32901414	P39_cKOvsControl_cKO_hypo_dmr_2582|4|0.599|0.903	0	.
chr1	32904678	32905213	P39_cKOvsControl_cKO_hypo_dmr_2583|7|0.546|0.860	0	.
chr1	32957920	32958088	P39_cKOvsControl_cKO_hypo_dmr_2588|3|0.436|0.895	0	.
chr1	32984745	32984934	P39_cKOvsControl_cKO_hypo_dmr_2590|6|0.263|0.694	0	.
chr1	32986008	32986127	P39_cKOvsControl_cKO_hypo_dmr_2591|5|0.310|0.676	0	.
chr1	32999994	33000392	P39_cKOvsControl_cKO_hypo_dmr_2592|3|0.352|0.785	0	.
chr1	33005112	33005180	P39_cKOvsControl_cKO_hypo_dmr_2593|3|0.314|0.632	0	.
chr1	33024427	33025782	P39_cKOvsControl_cKO_hypo_dmr_2594|31|0.126|0.766	0	.
chr1	33026761	33027557	P39_cKOvsControl_cKO_hypo_dmr_2595|20|0.181|0.841	0	.
chr1	33032808	33033418	P39_cKOvsControl_cKO_hypo_dmr_2598|8|0.516|0.837	0	.
chr1	33040916	33042647	P39_cKOvsControl_cKO_hypo_dmr_2599|19|0.442|0.778	0	.
chr1	33087390	33087491	P39_cKOvsControl_cKO_hypo_dmr_2601|3|0.452|0.815	0	.
chr1	33098047	33098292	P39_cKOvsControl_cKO_hypo_dmr_2603|8|0.057|0.725	0	.
chr1	33123432	33123874	P39_cKOvsControl_cKO_hypo_dmr_2605|6|0.525|0.835	0	.
chr1	33127880	33128431	P39_cKOvsControl_cKO_hypo_dmr_2607|6|0.164|0.514	0	.
chr1	33138222	33138703	P39_cKOvsControl_cKO_hypo_dmr_2608|7|0.490|0.795	0	.
chr1	33144559	33144646	P39_cKOvsControl_cKO_hypo_dmr_2609|4|0.175|0.659	0	.
chr1	33148312	33149140	P39_cKOvsControl_cKO_hypo_dmr_2611|5|0.396|0.744	0	.
chr1	33150366	33150419	P39_cKOvsControl_cKO_hypo_dmr_2612|4|0.222|0.659	0	.
chr1	33173353	33173618	P39_cKOvsControl_cKO_hypo_dmr_2613|5|0.566|0.875	0	.
chr1	33180028	33180185	P39_cKOvsControl_cKO_hypo_dmr_2614|9|0.386|0.918	0	.
chr1	33181541	33182468	P39_cKOvsControl_cKO_hypo_dmr_2615|12|0.347|0.702	0	.
chr1	33186237	33186356	P39_cKOvsControl_cKO_hypo_dmr_2616|6|0.108|0.567	0	.
chr1	33192269	33192369	P39_cKOvsControl_cKO_hypo_dmr_2617|3|0.378|0.685	0	.
chr1	33214918	33216378	P39_cKOvsControl_cKO_hypo_dmr_2620|23|0.282|0.840	0	.
chr1	33219701	33219713	P39_cKOvsControl_cKO_hypo_dmr_2621|4|0.194|0.727	0	.
chr1	33238539	33238927	P39_cKOvsControl_cKO_hypo_dmr_2622|4|0.428|0.743	0	.
chr1	33246376	33248033	P39_cKOvsControl_cKO_hypo_dmr_2623|29|0.281|0.615	0	.
chr1	33268882	33270227	P39_cKOvsControl_cKO_hypo_dmr_2626|20|0.316|0.716	0	.
chr1	33280930	33282599	P39_cKOvsControl_cKO_hypo_dmr_2627|17|0.420|0.754	0	.
chr1	33283860	33284241	P39_cKOvsControl_cKO_hypo_dmr_2628|6|0.310|0.625	0	.
chr1	33313675	33313862	P39_cKOvsControl_cKO_hypo_dmr_2629|3|0.231|0.638	0	.
chr1	33334117	33334500	P39_cKOvsControl_cKO_hypo_dmr_2630|6|0.223|0.631	0	.
chr1	33354925	33356189	P39_cKOvsControl_cKO_hypo_dmr_2631|14|0.529|0.865	0	.
chr1	33358104	33358955	P39_cKOvsControl_cKO_hypo_dmr_2632|6|0.277|0.708	0	.
chr1	33361037	33361266	P39_cKOvsControl_cKO_hypo_dmr_2633|6|0.387|0.689	0	.
chr1	33362485	33362742	P39_cKOvsControl_cKO_hypo_dmr_2634|8|0.039|0.489	0	.
chr1	33363279	33363879	P39_cKOvsControl_cKO_hypo_dmr_2635|12|0.143|0.652	0	.
chr1	33394340	33394664	P39_cKOvsControl_cKO_hypo_dmr_2637|3|0.511|0.851	0	.
chr1	33399751	33400156	P39_cKOvsControl_cKO_hypo_dmr_2639|4|0.382|0.864	0	.
chr1	33423671	33423731	P39_cKOvsControl_cKO_hypo_dmr_2641|3|0.382|0.795	0	.
chr1	33452740	33453459	P39_cKOvsControl_cKO_hypo_dmr_2644|14|0.536|0.922	0	.
chr1	33454993	33455593	P39_cKOvsControl_cKO_hypo_dmr_2645|5|0.363|0.691	0	.
chr1	33464411	33464757	P39_cKOvsControl_cKO_hypo_dmr_2648|8|0.392|0.863	0	.
chr1	33480006	33481176	P39_cKOvsControl_cKO_hypo_dmr_2651|14|0.573|0.909	0	.
chr1	33483295	33483485	P39_cKOvsControl_cKO_hypo_dmr_2652|3|0.402|0.757	0	.
chr1	33489532	33490918	P39_cKOvsControl_cKO_hypo_dmr_2653|21|0.381|0.753	0	.
chr1	33494403	33494424	P39_cKOvsControl_cKO_hypo_dmr_2654|4|0.593|0.953	0	.
chr1	33494947	33496941	P39_cKOvsControl_cKO_hypo_dmr_2655|32|0.254|0.684	0	.
chr1	33499013	33502234	P39_cKOvsControl_cKO_hypo_dmr_2657|58|0.436|0.821	0	.
chr1	33502778	33504221	P39_cKOvsControl_cKO_hypo_dmr_2658|33|0.304|0.897	0	.
chr1	33526810	33527996	P39_cKOvsControl_cKO_hypo_dmr_2664|17|0.237|0.626	0	.
chr1	33528861	33529219	P39_cKOvsControl_cKO_hypo_dmr_2665|12|0.382|0.876	0	.
chr1	33532968	33533702	P39_cKOvsControl_cKO_hypo_dmr_2667|8|0.390|0.736	0	.
chr1	33534659	33534980	P39_cKOvsControl_cKO_hypo_dmr_2668|11|0.414|0.801	0	.
chr1	33548014	33548141	P39_cKOvsControl_cKO_hypo_dmr_2669|4|0.492|0.839	0	.
chr1	33577770	33580926	P39_cKOvsControl_cKO_hypo_dmr_2670|32|0.510|0.872	0	.
chr1	33583955	33584164	P39_cKOvsControl_cKO_hypo_dmr_2671|3|0.368|0.788	0	.
chr1	33588530	33591269	P39_cKOvsControl_cKO_hypo_dmr_2672|31|0.325|0.768	0	.
chr1	33595163	33595836	P39_cKOvsControl_cKO_hypo_dmr_2673|4|0.517|0.876	0	.
chr1	33599112	33600006	P39_cKOvsControl_cKO_hypo_dmr_2674|10|0.179|0.692	0	.
chr1	33607783	33608997	P39_cKOvsControl_cKO_hypo_dmr_2676|13|0.455|0.808	0	.
chr1	33610025	33610453	P39_cKOvsControl_cKO_hypo_dmr_2677|20|0.027|0.457	0	.
chr1	33624728	33624742	P39_cKOvsControl_cKO_hypo_dmr_2681|3|0.285|0.710	0	.
chr1	33625797	33626545	P39_cKOvsControl_cKO_hypo_dmr_2682|14|0.310|0.780	0	.
chr1	33628283	33628428	P39_cKOvsControl_cKO_hypo_dmr_2683|3|0.433|0.788	0	.
chr1	33631657	33631687	P39_cKOvsControl_cKO_hypo_dmr_2684|3|0.539|0.868	0	.
chr1	33636157	33636335	P39_cKOvsControl_cKO_hypo_dmr_2685|9|0.373|0.901	0	.
chr1	33638242	33638829	P39_cKOvsControl_cKO_hypo_dmr_2686|11|0.534|0.857	0	.
chr1	33643883	33645335	P39_cKOvsControl_cKO_hypo_dmr_2689|20|0.550|0.893	0	.
chr1	33646020	33646160	P39_cKOvsControl_cKO_hypo_dmr_2690|4|0.124|0.624	0	.
chr1	33646792	33647223	P39_cKOvsControl_cKO_hypo_dmr_2691|10|0.260|0.619	0	.
chr1	33658455	33658555	P39_cKOvsControl_cKO_hypo_dmr_2693|3|0.372|0.743	0	.
chr1	33677730	33678601	P39_cKOvsControl_cKO_hypo_dmr_2696|11|0.265|0.575	0	.
chr1	33681949	33682094	P39_cKOvsControl_cKO_hypo_dmr_2697|4|0.131|0.693	0	.
chr1	33693204	33693925	P39_cKOvsControl_cKO_hypo_dmr_2701|8|0.351|0.677	0	.
chr1	33696727	33697160	P39_cKOvsControl_cKO_hypo_dmr_2702|12|0.203|0.708	0	.
chr1	33733648	33733871	P39_cKOvsControl_cKO_hypo_dmr_2704|3|0.355|0.694	0	.
chr1	33754978	33756593	P39_cKOvsControl_cKO_hypo_dmr_2707|39|0.188|0.529	0	.
chr1	33766733	33767311	P39_cKOvsControl_cKO_hypo_dmr_2708|9|0.316|0.706	0	.
chr1	33870963	33871400	P39_cKOvsControl_cKO_hypo_dmr_2714|8|0.419|0.736	0	.
chr1	33873230	33874592	P39_cKOvsControl_cKO_hypo_dmr_2715|15|0.233|0.632	0	.
chr1	33875696	33875795	P39_cKOvsControl_cKO_hypo_dmr_2716|8|0.478|0.861	0	.
chr1	33878532	33878617	P39_cKOvsControl_cKO_hypo_dmr_2717|4|0.561|0.884	0	.
chr1	33885872	33885909	P39_cKOvsControl_cKO_hypo_dmr_2719|3|0.649|0.968	0	.
chr1	33895500	33896852	P39_cKOvsControl_cKO_hypo_dmr_2722|20|0.281|0.714	0	.
chr1	33897426	33897590	P39_cKOvsControl_cKO_hypo_dmr_2723|5|0.057|0.382	0	.
chr1	33903379	33903802	P39_cKOvsControl_cKO_hypo_dmr_2725|8|0.461|0.807	0	.
chr1	33911408	33911956	P39_cKOvsControl_cKO_hypo_dmr_2726|9|0.237|0.573	0	.
chr1	33927649	33927767	P39_cKOvsControl_cKO_hypo_dmr_2727|4|0.292|0.749	0	.
chr1	33931884	33932130	P39_cKOvsControl_cKO_hypo_dmr_2728|12|0.152|0.721	0	.
chr1	33933690	33933716	P39_cKOvsControl_cKO_hypo_dmr_2729|4|0.165|0.498	0	.
chr1	33936366	33936457	P39_cKOvsControl_cKO_hypo_dmr_2730|5|0.201|0.628	0	.
chr1	33937264	33938341	P39_cKOvsControl_cKO_hypo_dmr_2731|32|0.222|0.737	0	.
chr1	33940915	33941656	P39_cKOvsControl_cKO_hypo_dmr_2733|6|0.172|0.548	0	.
chr1	33968949	33969794	P39_cKOvsControl_cKO_hypo_dmr_2737|12|0.467|0.768	0	.
chr1	33972863	33973695	P39_cKOvsControl_cKO_hypo_dmr_2738|13|0.452|0.760	0	.
chr1	33975413	33976432	P39_cKOvsControl_cKO_hypo_dmr_2739|15|0.449|0.824	0	.
chr1	33993344	33993911	P39_cKOvsControl_cKO_hypo_dmr_2742|5|0.152|0.463	0	.
chr1	34001165	34001362	P39_cKOvsControl_cKO_hypo_dmr_2744|4|0.433|0.760	0	.
chr1	34016866	34017131	P39_cKOvsControl_cKO_hypo_dmr_2749|9|0.180|0.492	0	.
chr1	34023771	34024620	P39_cKOvsControl_cKO_hypo_dmr_2751|15|0.204|0.554	0	.
chr1	34041851	34042534	P39_cKOvsControl_cKO_hypo_dmr_2754|9|0.192|0.592	0	.
chr1	34045245	34045399	P39_cKOvsControl_cKO_hypo_dmr_2755|8|0.213|0.711	0	.
chr1	34047880	34048547	P39_cKOvsControl_cKO_hypo_dmr_2756|16|0.427|0.782	0	.
chr1	34051951	34053359	P39_cKOvsControl_cKO_hypo_dmr_2757|24|0.294|0.627	0	.
chr1	34062651	34063272	P39_cKOvsControl_cKO_hypo_dmr_2759|7|0.361|0.667	0	.
chr1	34073924	34075369	P39_cKOvsControl_cKO_hypo_dmr_2762|29|0.163|0.656	0	.
chr1	34095287	34095415	P39_cKOvsControl_cKO_hypo_dmr_2764|4|0.266|0.806	0	.
chr1	34098739	34098887	P39_cKOvsControl_cKO_hypo_dmr_2765|3|0.333|0.658	0	.
chr1	34100326	34101275	P39_cKOvsControl_cKO_hypo_dmr_2766|12|0.382|0.696	0	.
chr1	34103219	34104397	P39_cKOvsControl_cKO_hypo_dmr_2767|10|0.176|0.506	0	.
chr1	34104933	34107330	P39_cKOvsControl_cKO_hypo_dmr_2768|48|0.158|0.550	0	.
chr1	34110419	34110691	P39_cKOvsControl_cKO_hypo_dmr_2770|5|0.240|0.562	0	.
chr1	34119518	34121492	P39_cKOvsControl_cKO_hypo_dmr_2773|22|0.370|0.692	0	.
chr1	34123300	34123626	P39_cKOvsControl_cKO_hypo_dmr_2774|5|0.458|0.782	0	.
chr1	34124606	34125096	P39_cKOvsControl_cKO_hypo_dmr_2775|9|0.321|0.753	0	.
chr1	34127330	34127786	P39_cKOvsControl_cKO_hypo_dmr_2776|7|0.104|0.437	0	.
chr1	34129885	34131317	P39_cKOvsControl_cKO_hypo_dmr_2777|25|0.474|0.827	0	.
chr1	34134132	34134683	P39_cKOvsControl_cKO_hypo_dmr_2779|15|0.411|0.777	0	.
chr1	34138545	34139163	P39_cKOvsControl_cKO_hypo_dmr_2780|14|0.034|0.551	0	.
chr1	34139771	34139891	P39_cKOvsControl_cKO_hypo_dmr_2781|3|0.550|0.861	0	.
chr1	34140435	34141418	P39_cKOvsControl_cKO_hypo_dmr_2782|11|0.142|0.533	0	.
chr1	34144734	34145472	P39_cKOvsControl_cKO_hypo_dmr_2783|8|0.377|0.712	0	.
chr1	34150124	34151176	P39_cKOvsControl_cKO_hypo_dmr_2785|21|0.252|0.729	0	.
chr1	34156226	34156429	P39_cKOvsControl_cKO_hypo_dmr_2786|5|0.291|0.753	0	.
chr1	34158816	34160098	P39_cKOvsControl_cKO_hypo_dmr_2787|18|0.239|0.577	0	.
chr1	34166090	34166240	P39_cKOvsControl_cKO_hypo_dmr_2789|6|0.033|0.452	0	.
chr1	34177001	34177391	P39_cKOvsControl_cKO_hypo_dmr_2791|11|0.370|0.770	0	.
chr1	34181936	34182049	P39_cKOvsControl_cKO_hypo_dmr_2793|6|0.289|0.761	0	.
chr1	34185038	34185086	P39_cKOvsControl_cKO_hypo_dmr_2794|3|0.392|0.795	0	.
chr1	34187703	34187810	P39_cKOvsControl_cKO_hypo_dmr_2795|6|0.265|0.651	0	.
chr1	34216379	34216926	P39_cKOvsControl_cKO_hypo_dmr_2796|8|0.279|0.660	0	.
chr1	34233154	34234192	P39_cKOvsControl_cKO_hypo_dmr_2797|19|0.366|0.761	0	.
chr1	34234907	34238513	P39_cKOvsControl_cKO_hypo_dmr_2798|74|0.193|0.516	0	.
chr1	34241017	34241086	P39_cKOvsControl_cKO_hypo_dmr_2800|6|0.157|0.534	0	.
chr1	34269986	34270083	P39_cKOvsControl_cKO_hypo_dmr_2802|3|0.429|0.801	0	.
chr1	34296191	34300056	P39_cKOvsControl_cKO_hypo_dmr_2805|69|0.164|0.491	0	.
chr1	34303985	34304492	P39_cKOvsControl_cKO_hypo_dmr_2806|6|0.081|0.422	0	.
chr1	34323995	34324464	P39_cKOvsControl_cKO_hypo_dmr_2808|11|0.211|0.611	0	.
chr1	34332946	34333011	P39_cKOvsControl_cKO_hypo_dmr_2811|4|0.120|0.494	0	.
chr1	34375553	34376400	P39_cKOvsControl_cKO_hypo_dmr_2812|8|0.292|0.619	0	.
chr1	34398869	34399870	P39_cKOvsControl_cKO_hypo_dmr_2817|20|0.285|0.717	0	.
chr1	34402060	34402851	P39_cKOvsControl_cKO_hypo_dmr_2818|14|0.169|0.639	0	.
chr1	34408627	34409278	P39_cKOvsControl_cKO_hypo_dmr_2819|5|0.525|0.830	0	.
chr1	34460489	34460661	P39_cKOvsControl_cKO_hypo_dmr_2822|8|0.282|0.778	0	.
chr1	34467079	34468599	P39_cKOvsControl_cKO_hypo_dmr_2824|21|0.359|0.744	0	.
chr1	34469912	34470297	P39_cKOvsControl_cKO_hypo_dmr_2825|6|0.573|0.877	0	.
chr1	34471695	34472170	P39_cKOvsControl_cKO_hypo_dmr_2826|6|0.391|0.698	0	.
chr1	34477885	34477986	P39_cKOvsControl_cKO_hypo_dmr_2828|4|0.373|0.833	0	.
chr1	34485046	34485517	P39_cKOvsControl_cKO_hypo_dmr_2830|12|0.228|0.698	0	.
chr1	34503197	34503277	P39_cKOvsControl_cKO_hypo_dmr_2832|3|0.233|0.860	0	.
chr1	34516863	34517137	P39_cKOvsControl_cKO_hypo_dmr_2834|3|0.373|0.739	0	.
chr1	34522027	34523027	P39_cKOvsControl_cKO_hypo_dmr_2835|12|0.494|0.812	0	.
chr1	34525140	34525157	P39_cKOvsControl_cKO_hypo_dmr_2836|3|0.289|0.656	0	.
chr1	34527450	34527524	P39_cKOvsControl_cKO_hypo_dmr_2837|3|0.485|0.857	0	.
chr1	34535531	34536361	P39_cKOvsControl_cKO_hypo_dmr_2839|13|0.186|0.522	0	.
chr1	34538996	34539244	P39_cKOvsControl_cKO_hypo_dmr_2841|5|0.553|0.910	0	.
chr1	34543911	34544593	P39_cKOvsControl_cKO_hypo_dmr_2843|6|0.394|0.769	0	.
chr1	34551625	34551798	P39_cKOvsControl_cKO_hypo_dmr_2844|3|0.509|0.829	0	.
chr1	34575138	34576545	P39_cKOvsControl_cKO_hypo_dmr_2845|11|0.476|0.808	0	.
chr1	34636872	34637272	P39_cKOvsControl_cKO_hypo_dmr_2850|8|0.381|0.888	0	.
chr1	34640196	34640478	P39_cKOvsControl_cKO_hypo_dmr_2852|7|0.302|0.747	0	.
chr1	34664205	34667273	P39_cKOvsControl_cKO_hypo_dmr_2854|78|0.215|0.769	0	.
chr1	34686561	34687101	P39_cKOvsControl_cKO_hypo_dmr_2858|5|0.413|0.715	0	.
chr1	34688472	34688630	P39_cKOvsControl_cKO_hypo_dmr_2859|4|0.574|0.910	0	.
chr1	34696809	34696948	P39_cKOvsControl_cKO_hypo_dmr_2860|4|0.244|0.701	0	.
chr1	34705015	34705082	P39_cKOvsControl_cKO_hypo_dmr_2863|3|0.335|0.801	0	.
chr1	34706330	34706530	P39_cKOvsControl_cKO_hypo_dmr_2864|10|0.552|0.959	0	.
chr1	34739131	34739314	P39_cKOvsControl_cKO_hypo_dmr_2873|5|0.533|0.836	0	.
chr1	34741122	34741216	P39_cKOvsControl_cKO_hypo_dmr_2874|3|0.326|0.832	0	.
chr1	34754977	34755066	P39_cKOvsControl_cKO_hypo_dmr_2877|4|0.421|0.785	0	.
chr1	34755701	34756529	P39_cKOvsControl_cKO_hypo_dmr_2878|8|0.502|0.805	0	.
chr1	34773546	34773641	P39_cKOvsControl_cKO_hypo_dmr_2882|3|0.426|0.806	0	.
chr1	34781990	34782028	P39_cKOvsControl_cKO_hypo_dmr_2883|4|0.451|0.892	0	.
chr1	34853144	34853191	P39_cKOvsControl_cKO_hypo_dmr_2887|4|0.278|0.709	0	.
chr1	34854195	34854532	P39_cKOvsControl_cKO_hypo_dmr_2888|5|0.360|0.683	0	.
chr1	34879423	34879506	P39_cKOvsControl_cKO_hypo_dmr_2890|4|0.470|0.853	0	.
chr1	34893644	34894322	P39_cKOvsControl_cKO_hypo_dmr_2891|6|0.465|0.831	0	.
chr1	34894849	34895141	P39_cKOvsControl_cKO_hypo_dmr_2892|15|0.252|0.870	0	.
chr1	34896390	34897017	P39_cKOvsControl_cKO_hypo_dmr_2893|9|0.320|0.689	0	.
chr1	34900349	34900500	P39_cKOvsControl_cKO_hypo_dmr_2894|6|0.580|0.898	0	.
chr1	34921180	34921292	P39_cKOvsControl_cKO_hypo_dmr_2896|5|0.259|0.673	0	.
chr1	34925107	34925226	P39_cKOvsControl_cKO_hypo_dmr_2898|7|0.214|0.774	0	.
chr1	34954693	34954749	P39_cKOvsControl_cKO_hypo_dmr_2900|3|0.490|0.892	0	.
chr1	34961580	34962868	P39_cKOvsControl_cKO_hypo_dmr_2901|26|0.270|0.692	0	.
chr1	34967470	34968027	P39_cKOvsControl_cKO_hypo_dmr_2902|8|0.182|0.614	0	.
chr1	34975866	34976001	P39_cKOvsControl_cKO_hypo_dmr_2904|4|0.143|0.465	0	.
chr1	34983196	34983249	P39_cKOvsControl_cKO_hypo_dmr_2905|4|0.026|0.585	0	.
chr1	34987512	34988054	P39_cKOvsControl_cKO_hypo_dmr_2907|15|0.082|0.438	0	.
chr1	34988877	34988927	P39_cKOvsControl_cKO_hypo_dmr_2908|3|0.509|0.824	0	.
chr1	34998009	34998599	P39_cKOvsControl_cKO_hypo_dmr_2912|12|0.167|0.670	0	.
chr1	35005260	35005782	P39_cKOvsControl_cKO_hypo_dmr_2913|9|0.225|0.738	0	.
chr1	35017488	35018161	P39_cKOvsControl_cKO_hypo_dmr_2915|5|0.512|0.851	0	.
chr1	35018997	35019207	P39_cKOvsControl_cKO_hypo_dmr_2916|6|0.595|0.985	0	.
chr1	35025712	35026124	P39_cKOvsControl_cKO_hypo_dmr_2917|5|0.282|0.643	0	.
chr1	35031427	35031726	P39_cKOvsControl_cKO_hypo_dmr_2918|3|0.576|0.897	0	.
chr1	35041765	35042218	P39_cKOvsControl_cKO_hypo_dmr_2919|3|0.530|0.859	0	.
chr1	35050805	35050989	P39_cKOvsControl_cKO_hypo_dmr_2920|3|0.460|0.807	0	.
chr1	35054300	35054858	P39_cKOvsControl_cKO_hypo_dmr_2921|5|0.278|0.678	0	.
chr1	35058850	35058920	P39_cKOvsControl_cKO_hypo_dmr_2922|3|0.561|0.945	0	.
chr1	35059518	35059972	P39_cKOvsControl_cKO_hypo_dmr_2923|9|0.553|0.896	0	.
chr1	35078049	35078134	P39_cKOvsControl_cKO_hypo_dmr_2924|6|0.267|0.800	0	.
chr1	35090174	35090668	P39_cKOvsControl_cKO_hypo_dmr_2927|4|0.493|0.835	0	.
chr1	35095220	35096691	P39_cKOvsControl_cKO_hypo_dmr_2928|12|0.338|0.760	0	.
chr1	35105426	35105930	P39_cKOvsControl_cKO_hypo_dmr_2929|6|0.455|0.855	0	.
chr1	35137090	35137162	P39_cKOvsControl_cKO_hypo_dmr_2930|3|0.265|0.628	0	.
chr1	35137668	35139205	P39_cKOvsControl_cKO_hypo_dmr_2931|12|0.400|0.704	0	.
chr1	35161440	35161778	P39_cKOvsControl_cKO_hypo_dmr_2934|4|0.496|0.849	0	.
chr1	35173039	35173754	P39_cKOvsControl_cKO_hypo_dmr_2936|12|0.442|0.783	0	.
chr1	35183073	35183504	P39_cKOvsControl_cKO_hypo_dmr_2937|3|0.325|0.768	0	.
chr1	35190904	35191113	P39_cKOvsControl_cKO_hypo_dmr_2938|3|0.113|0.562	0	.
chr1	35195534	35196561	P39_cKOvsControl_cKO_hypo_dmr_2939|12|0.400|0.785	0	.
chr1	35212267	35212720	P39_cKOvsControl_cKO_hypo_dmr_2940|15|0.392|0.862	0	.
chr1	35219341	35219672	P39_cKOvsControl_cKO_hypo_dmr_2941|4|0.336|0.775	0	.
chr1	35232498	35233002	P39_cKOvsControl_cKO_hypo_dmr_2942|8|0.062|0.706	0	.
chr1	35241304	35241976	P39_cKOvsControl_cKO_hypo_dmr_2944|10|0.362|0.744	0	.
chr1	35261458	35261799	P39_cKOvsControl_cKO_hypo_dmr_2949|3|0.384|0.729	0	.
chr1	35265610	35266783	P39_cKOvsControl_cKO_hypo_dmr_2950|13|0.444|0.845	0	.
chr1	35269832	35270255	P39_cKOvsControl_cKO_hypo_dmr_2951|7|0.281|0.779	0	.
chr1	35282461	35282536	P39_cKOvsControl_cKO_hypo_dmr_2952|3|0.314|0.792	0	.
chr1	35322217	35322471	P39_cKOvsControl_cKO_hypo_dmr_2955|4|0.348|0.733	0	.
chr1	35334604	35335055	P39_cKOvsControl_cKO_hypo_dmr_2958|9|0.502|0.832	0	.
chr1	35345313	35345867	P39_cKOvsControl_cKO_hypo_dmr_2960|10|0.358|0.759	0	.
chr1	35347851	35347868	P39_cKOvsControl_cKO_hypo_dmr_2961|4|0.207|0.801	0	.
chr1	35354927	35355776	P39_cKOvsControl_cKO_hypo_dmr_2962|6|0.211|0.623	0	.
chr1	35358647	35359211	P39_cKOvsControl_cKO_hypo_dmr_2963|15|0.183|0.732	0	.
chr1	35363067	35363409	P39_cKOvsControl_cKO_hypo_dmr_2964|3|0.060|0.537	0	.
chr1	35366020	35366094	P39_cKOvsControl_cKO_hypo_dmr_2965|3|0.565|0.929	0	.
chr1	35367987	35368174	P39_cKOvsControl_cKO_hypo_dmr_2966|7|0.119|0.566	0	.
chr1	35372360	35372988	P39_cKOvsControl_cKO_hypo_dmr_2967|12|0.313|0.669	0	.
chr1	35378336	35378908	P39_cKOvsControl_cKO_hypo_dmr_2969|7|0.498|0.841	0	.
chr1	35380823	35381549	P39_cKOvsControl_cKO_hypo_dmr_2970|10|0.582|0.912	0	.
chr1	35389168	35389918	P39_cKOvsControl_cKO_hypo_dmr_2973|10|0.521|0.870	0	.
chr1	35390912	35391489	P39_cKOvsControl_cKO_hypo_dmr_2974|9|0.419|0.847	0	.
chr1	35397011	35397133	P39_cKOvsControl_cKO_hypo_dmr_2976|3|0.388|0.829	0	.
chr1	35400805	35402603	P39_cKOvsControl_cKO_hypo_dmr_2977|52|0.299|0.859	0	.
chr1	35405564	35405800	P39_cKOvsControl_cKO_hypo_dmr_2978|8|0.293|0.841	0	.
chr1	35416084	35417298	P39_cKOvsControl_cKO_hypo_dmr_2979|21|0.129|0.659	0	.
chr1	35423554	35423657	P39_cKOvsControl_cKO_hypo_dmr_2980|6|0.251|0.765	0	.
chr1	35432673	35432893	P39_cKOvsControl_cKO_hypo_dmr_2982|4|0.585|0.901	0	.
chr1	35438983	35439572	P39_cKOvsControl_cKO_hypo_dmr_2983|5|0.444|0.794	0	.
chr1	35457369	35457416	P39_cKOvsControl_cKO_hypo_dmr_2986|5|0.336|0.851	0	.
chr1	35457917	35458293	P39_cKOvsControl_cKO_hypo_dmr_2987|9|0.385|0.853	0	.
chr1	35458882	35458961	P39_cKOvsControl_cKO_hypo_dmr_2988|3|0.504|0.864	0	.
chr1	35463165	35463269	P39_cKOvsControl_cKO_hypo_dmr_2989|3|0.398|0.800	0	.
chr1	35464185	35464625	P39_cKOvsControl_cKO_hypo_dmr_2990|12|0.194|0.850	0	.
chr1	35465605	35466339	P39_cKOvsControl_cKO_hypo_dmr_2991|8|0.368|0.752	0	.
chr1	35468418	35468558	P39_cKOvsControl_cKO_hypo_dmr_2992|4|0.244|0.851	0	.
chr1	35469151	35469836	P39_cKOvsControl_cKO_hypo_dmr_2993|6|0.338|0.674	0	.
chr1	35470850	35470916	P39_cKOvsControl_cKO_hypo_dmr_2994|4|0.182|0.862	0	.
chr1	35480304	35480502	P39_cKOvsControl_cKO_hypo_dmr_2995|3|0.538|0.852	0	.
chr1	35522850	35523231	P39_cKOvsControl_cKO_hypo_dmr_2998|6|0.412|0.876	0	.
chr1	35528035	35528763	P39_cKOvsControl_cKO_hypo_dmr_2999|18|0.427|0.775	0	.
chr1	35529462	35529684	P39_cKOvsControl_cKO_hypo_dmr_3000|6|0.453|0.812	0	.
chr1	35541409	35541758	P39_cKOvsControl_cKO_hypo_dmr_3001|5|0.467|0.792	0	.
chr1	35543969	35544049	P39_cKOvsControl_cKO_hypo_dmr_3002|4|0.233|0.655	0	.
chr1	35580083	35580668	P39_cKOvsControl_cKO_hypo_dmr_3006|11|0.246|0.743	0	.
chr1	35582142	35582462	P39_cKOvsControl_cKO_hypo_dmr_3007|3|0.263|0.883	0	.
chr1	35586184	35586768	P39_cKOvsControl_cKO_hypo_dmr_3008|10|0.369|0.801	0	.
chr1	35588578	35589690	P39_cKOvsControl_cKO_hypo_dmr_3009|13|0.422|0.826	0	.
chr1	35602568	35602660	P39_cKOvsControl_cKO_hypo_dmr_3010|3|0.551|0.852	0	.
chr1	35605272	35605364	P39_cKOvsControl_cKO_hypo_dmr_3011|3|0.128|0.472	0	.
chr1	35606867	35607097	P39_cKOvsControl_cKO_hypo_dmr_3012|5|0.518|0.854	0	.
chr1	35622026	35622086	P39_cKOvsControl_cKO_hypo_dmr_3014|4|0.139|0.620	0	.
chr1	35625163	35625379	P39_cKOvsControl_cKO_hypo_dmr_3015|7|0.244|0.771	0	.
chr1	35631386	35632007	P39_cKOvsControl_cKO_hypo_dmr_3017|8|0.536|0.855	0	.
chr1	35645429	35645717	P39_cKOvsControl_cKO_hypo_dmr_3020|5|0.386|0.845	0	.
chr1	35653062	35654720	P39_cKOvsControl_cKO_hypo_dmr_3021|18|0.232|0.548	0	.
chr1	35681521	35684425	P39_cKOvsControl_cKO_hypo_dmr_3024|51|0.394|0.797	0	.
chr1	35685937	35687451	P39_cKOvsControl_cKO_hypo_dmr_3025|16|0.538|0.859	0	.
chr1	35693762	35695624	P39_cKOvsControl_cKO_hypo_dmr_3027|28|0.098|0.547	0	.
chr1	35697459	35698877	P39_cKOvsControl_cKO_hypo_dmr_3028|31|0.184|0.649	0	.
chr1	35701571	35702040	P39_cKOvsControl_cKO_hypo_dmr_3029|10|0.148|0.732	0	.
chr1	35704933	35705115	P39_cKOvsControl_cKO_hypo_dmr_3030|5|0.464|0.854	0	.
chr1	35711776	35711873	P39_cKOvsControl_cKO_hypo_dmr_3031|6|0.114|0.725	0	.
chr1	35714063	35714547	P39_cKOvsControl_cKO_hypo_dmr_3032|8|0.360|0.849	0	.
chr1	35720221	35720341	P39_cKOvsControl_cKO_hypo_dmr_3033|4|0.599|0.962	0	.
chr1	35721036	35721277	P39_cKOvsControl_cKO_hypo_dmr_3034|7|0.454|0.868	0	.
chr1	35722208	35724030	P39_cKOvsControl_cKO_hypo_dmr_3035|14|0.414|0.821	0	.
chr1	35729981	35730780	P39_cKOvsControl_cKO_hypo_dmr_3036|8|0.216|0.559	0	.
chr1	35749647	35751339	P39_cKOvsControl_cKO_hypo_dmr_3039|24|0.255|0.776	0	.
chr1	35761538	35762296	P39_cKOvsControl_cKO_hypo_dmr_3041|11|0.455|0.843	0	.
chr1	35778096	35778355	P39_cKOvsControl_cKO_hypo_dmr_3046|4|0.531|0.845	0	.
chr1	35785393	35785676	P39_cKOvsControl_cKO_hypo_dmr_3048|3|0.100|0.745	0	.
chr1	35786442	35786970	P39_cKOvsControl_cKO_hypo_dmr_3049|15|0.291|0.827	0	.
chr1	35796214	35796499	P39_cKOvsControl_cKO_hypo_dmr_3050|4|0.303|0.631	0	.
chr1	35801156	35801400	P39_cKOvsControl_cKO_hypo_dmr_3051|6|0.193|0.630	0	.
chr1	35802004	35805170	P39_cKOvsControl_cKO_hypo_dmr_3052|27|0.405|0.721	0	.
chr1	35805739	35806866	P39_cKOvsControl_cKO_hypo_dmr_3053|8|0.310|0.816	0	.
chr1	35811437	35811963	P39_cKOvsControl_cKO_hypo_dmr_3054|11|0.199|0.808	0	.
chr1	35813089	35813440	P39_cKOvsControl_cKO_hypo_dmr_3055|5|0.475|0.879	0	.
chr1	35834093	35835568	P39_cKOvsControl_cKO_hypo_dmr_3061|15|0.364|0.699	0	.
chr1	35847402	35847652	P39_cKOvsControl_cKO_hypo_dmr_3062|4|0.286|0.721	0	.
chr1	35848415	35849560	P39_cKOvsControl_cKO_hypo_dmr_3063|19|0.226|0.643	0	.
chr1	35859626	35859742	P39_cKOvsControl_cKO_hypo_dmr_3064|4|0.355|0.687	0	.
chr1	35865473	35866239	P39_cKOvsControl_cKO_hypo_dmr_3065|10|0.493|0.856	0	.
chr1	35872501	35872808	P39_cKOvsControl_cKO_hypo_dmr_3067|4|0.571|0.874	0	.
chr1	35874297	35876333	P39_cKOvsControl_cKO_hypo_dmr_3068|39|0.276|0.760	0	.
chr1	35878620	35878660	P39_cKOvsControl_cKO_hypo_dmr_3069|3|0.098|0.590	0	.
chr1	35884165	35884365	P39_cKOvsControl_cKO_hypo_dmr_3070|7|0.571|0.965	0	.
chr1	35885173	35885991	P39_cKOvsControl_cKO_hypo_dmr_3071|25|0.241|0.779	0	.
chr1	35888303	35888567	P39_cKOvsControl_cKO_hypo_dmr_3072|3|0.349|0.713	0	.
chr1	35889877	35890237	P39_cKOvsControl_cKO_hypo_dmr_3073|11|0.299|0.786	0	.
chr1	35890841	35891103	P39_cKOvsControl_cKO_hypo_dmr_3074|8|0.418|0.881	0	.
chr1	35905784	35905813	P39_cKOvsControl_cKO_hypo_dmr_3075|4|0.465|0.891	0	.
chr1	35911803	35911925	P39_cKOvsControl_cKO_hypo_dmr_3076|5|0.204|0.787	0	.
chr1	35913579	35913753	P39_cKOvsControl_cKO_hypo_dmr_3077|3|0.432|0.738	0	.
chr1	35920114	35920660	P39_cKOvsControl_cKO_hypo_dmr_3078|18|0.164|0.594	0	.
chr1	35928492	35928706	P39_cKOvsControl_cKO_hypo_dmr_3079|6|0.423|0.798	0	.
chr1	35930197	35930436	P39_cKOvsControl_cKO_hypo_dmr_3080|3|0.482|0.792	0	.
chr1	35930992	35931059	P39_cKOvsControl_cKO_hypo_dmr_3081|4|0.410|0.935	0	.
chr1	35936148	35936752	P39_cKOvsControl_cKO_hypo_dmr_3082|10|0.092|0.537	0	.
chr1	35940498	35942554	P39_cKOvsControl_cKO_hypo_dmr_3084|47|0.286|0.822	0	.
chr1	35943591	35944981	P39_cKOvsControl_cKO_hypo_dmr_3085|27|0.339|0.850	0	.
chr1	35954710	35954773	P39_cKOvsControl_cKO_hypo_dmr_3086|3|0.222|0.742	0	.
chr1	35957633	35958407	P39_cKOvsControl_cKO_hypo_dmr_3088|13|0.062|0.710	0	.
chr1	35958915	35959355	P39_cKOvsControl_cKO_hypo_dmr_3089|11|0.585|0.929	0	.
chr1	35969242	35969660	P39_cKOvsControl_cKO_hypo_dmr_3090|6|0.113|0.468	0	.
chr1	35971398	35972382	P39_cKOvsControl_cKO_hypo_dmr_3091|15|0.394|0.829	0	.
chr1	35982320	35983159	P39_cKOvsControl_cKO_hypo_dmr_3093|22|0.288|0.798	0	.
chr1	35986665	35986798	P39_cKOvsControl_cKO_hypo_dmr_3094|6|0.269|0.691	0	.
chr1	36000507	36000813	P39_cKOvsControl_cKO_hypo_dmr_3097|4|0.136|0.524	0	.
chr1	36003238	36004857	P39_cKOvsControl_cKO_hypo_dmr_3098|36|0.376|0.901	0	.
chr1	36007062	36007590	P39_cKOvsControl_cKO_hypo_dmr_3099|9|0.362|0.718	0	.
chr1	36013442	36014626	P39_cKOvsControl_cKO_hypo_dmr_3100|28|0.386|0.815	0	.
chr1	36016961	36018229	P39_cKOvsControl_cKO_hypo_dmr_3101|21|0.227|0.665	0	.
chr1	36029929	36030157	P39_cKOvsControl_cKO_hypo_dmr_3102|3|0.550|0.873	0	.
chr1	36038967	36039280	P39_cKOvsControl_cKO_hypo_dmr_3103|7|0.534|0.870	0	.
chr1	36058643	36058708	P39_cKOvsControl_cKO_hypo_dmr_3105|4|0.333|0.683	0	.
chr1	36059711	36061708	P39_cKOvsControl_cKO_hypo_dmr_3106|32|0.236|0.814	0	.
chr1	36062505	36063368	P39_cKOvsControl_cKO_hypo_dmr_3107|12|0.414|0.832	0	.
chr1	36063944	36064654	P39_cKOvsControl_cKO_hypo_dmr_3108|6|0.385|0.709	0	.
chr1	36066031	36066126	P39_cKOvsControl_cKO_hypo_dmr_3109|3|0.289|0.600	0	.
chr1	36075730	36076041	P39_cKOvsControl_cKO_hypo_dmr_3111|3|0.475|0.798	0	.
chr1	36077214	36077400	P39_cKOvsControl_cKO_hypo_dmr_3112|7|0.164|0.646	0	.
chr1	36081111	36081187	P39_cKOvsControl_cKO_hypo_dmr_3113|4|0.068|0.532	0	.
chr1	36088866	36089380	P39_cKOvsControl_cKO_hypo_dmr_3115|10|0.396|0.787	0	.
chr1	36091312	36091461	P39_cKOvsControl_cKO_hypo_dmr_3116|5|0.296|0.777	0	.
chr1	36116130	36116578	P39_cKOvsControl_cKO_hypo_dmr_3117|4|0.485|0.824	0	.
chr1	36120972	36121885	P39_cKOvsControl_cKO_hypo_dmr_3119|12|0.356|0.699	0	.
chr1	36123085	36123288	P39_cKOvsControl_cKO_hypo_dmr_3120|7|0.536|0.939	0	.
chr1	36131118	36132396	P39_cKOvsControl_cKO_hypo_dmr_3121|16|0.429|0.823	0	.
chr1	36240260	36240476	P39_cKOvsControl_cKO_hypo_dmr_3124|3|0.054|0.379	0	.
chr1	36246803	36247173	P39_cKOvsControl_cKO_hypo_dmr_3125|5|0.230|0.589	0	.
chr1	36250287	36251590	P39_cKOvsControl_cKO_hypo_dmr_3126|19|0.365|0.767	0	.
chr1	36255168	36255930	P39_cKOvsControl_cKO_hypo_dmr_3128|22|0.070|0.636	0	.
chr1	36259498	36259573	P39_cKOvsControl_cKO_hypo_dmr_3129|3|0.363|0.780	0	.
chr1	36264169	36264431	P39_cKOvsControl_cKO_hypo_dmr_3130|9|0.197|0.708	0	.
chr1	36266729	36266941	P39_cKOvsControl_cKO_hypo_dmr_3131|5|0.267|0.681	0	.
chr1	36288791	36288829	P39_cKOvsControl_cKO_hypo_dmr_3136|4|0.142|0.671	0	.
chr1	36294390	36294719	P39_cKOvsControl_cKO_hypo_dmr_3138|4|0.598|0.952	0	.
chr1	36296393	36296728	P39_cKOvsControl_cKO_hypo_dmr_3139|4|0.175|0.500	0	.
chr1	36298804	36301683	P39_cKOvsControl_cKO_hypo_dmr_3140|58|0.470|0.855	0	.
chr1	36302456	36302641	P39_cKOvsControl_cKO_hypo_dmr_3141|4|0.200|0.662	0	.
chr1	36308965	36309909	P39_cKOvsControl_cKO_hypo_dmr_3142|20|0.361|0.828	0	.
chr1	36313826	36313950	P39_cKOvsControl_cKO_hypo_dmr_3143|5|0.498|0.901	0	.
chr1	36317584	36317796	P39_cKOvsControl_cKO_hypo_dmr_3145|3|0.436|0.854	0	.
chr1	36370968	36371150	P39_cKOvsControl_cKO_hypo_dmr_3147|10|0.325|0.735	0	.
chr1	36382148	36382471	P39_cKOvsControl_cKO_hypo_dmr_3148|3|0.557|0.873	0	.
chr1	36387943	36388538	P39_cKOvsControl_cKO_hypo_dmr_3149|4|0.423|0.732	0	.
chr1	36389201	36389360	P39_cKOvsControl_cKO_hypo_dmr_3150|3|0.197|0.571	0	.
chr1	36427646	36427762	P39_cKOvsControl_cKO_hypo_dmr_3153|3|0.537|0.881	0	.
chr1	36432820	36432874	P39_cKOvsControl_cKO_hypo_dmr_3154|3|0.500|0.889	0	.
chr1	36460316	36460372	P39_cKOvsControl_cKO_hypo_dmr_3155|3|0.516|0.872	0	.
chr1	36462704	36462745	P39_cKOvsControl_cKO_hypo_dmr_3156|6|0.183|0.759	0	.
chr1	36469429	36470757	P39_cKOvsControl_cKO_hypo_dmr_3159|14|0.449|0.809	0	.
chr1	36478164	36478347	P39_cKOvsControl_cKO_hypo_dmr_3161|3|0.324|0.660	0	.
chr1	36478917	36479056	P39_cKOvsControl_cKO_hypo_dmr_3162|4|0.439|0.924	0	.
chr1	36479739	36479853	P39_cKOvsControl_cKO_hypo_dmr_3163|3|0.455|0.875	0	.
chr1	36480694	36480891	P39_cKOvsControl_cKO_hypo_dmr_3164|12|0.487|0.941	0	.
chr1	36484850	36485767	P39_cKOvsControl_cKO_hypo_dmr_3166|18|0.534|0.854	0	.
chr1	36489843	36489921	P39_cKOvsControl_cKO_hypo_dmr_3168|6|0.089|0.642	0	.
chr1	36492467	36492838	P39_cKOvsControl_cKO_hypo_dmr_3169|7|0.382|0.807	0	.
chr1	36517609	36517708	P39_cKOvsControl_cKO_hypo_dmr_3170|7|0.254|0.781	0	.
chr1	36518217	36518461	P39_cKOvsControl_cKO_hypo_dmr_3171|4|0.349|0.748	0	.
chr1	36527211	36527457	P39_cKOvsControl_cKO_hypo_dmr_3173|7|0.356|0.757	0	.
chr1	36528010	36528109	P39_cKOvsControl_cKO_hypo_dmr_3174|3|0.447|0.833	0	.
chr1	36528779	36529132	P39_cKOvsControl_cKO_hypo_dmr_3175|6|0.224|0.712	0	.
chr1	36534044	36534136	P39_cKOvsControl_cKO_hypo_dmr_3176|3|0.636|0.971	0	.
chr1	36537048	36537916	P39_cKOvsControl_cKO_hypo_dmr_3177|14|0.466|0.770	0	.
chr1	36554510	36554681	P39_cKOvsControl_cKO_hypo_dmr_3180|5|0.305|0.763	0	.
chr1	36555759	36555791	P39_cKOvsControl_cKO_hypo_dmr_3181|3|0.082|0.545	0	.
chr1	36558950	36560545	P39_cKOvsControl_cKO_hypo_dmr_3182|28|0.215|0.675	0	.
chr1	36561171	36561684	P39_cKOvsControl_cKO_hypo_dmr_3183|5|0.353|0.847	0	.
chr1	36564630	36564867	P39_cKOvsControl_cKO_hypo_dmr_3185|3|0.610|0.923	0	.
chr1	36565643	36566679	P39_cKOvsControl_cKO_hypo_dmr_3186|12|0.497|0.821	0	.
chr1	36567449	36570813	P39_cKOvsControl_cKO_hypo_dmr_3187|47|0.383|0.810	0	.
chr1	36575097	36576761	P39_cKOvsControl_cKO_hypo_dmr_3188|15|0.450|0.838	0	.
chr1	36577344	36577884	P39_cKOvsControl_cKO_hypo_dmr_3189|6|0.578|0.919	0	.
chr1	36581231	36582523	P39_cKOvsControl_cKO_hypo_dmr_3191|19|0.418|0.878	0	.
chr1	36584184	36584583	P39_cKOvsControl_cKO_hypo_dmr_3192|3|0.458|0.858	0	.
chr1	36585332	36585610	P39_cKOvsControl_cKO_hypo_dmr_3193|4|0.504|0.878	0	.
chr1	36586313	36586495	P39_cKOvsControl_cKO_hypo_dmr_3194|6|0.314|0.915	0	.
chr1	36587945	36588385	P39_cKOvsControl_cKO_hypo_dmr_3196|9|0.446|0.905	0	.
chr1	36588925	36589093	P39_cKOvsControl_cKO_hypo_dmr_3197|3|0.127|0.750	0	.
chr1	36589593	36591064	P39_cKOvsControl_cKO_hypo_dmr_3198|24|0.233|0.634	0	.
chr1	36592461	36593852	P39_cKOvsControl_cKO_hypo_dmr_3199|15|0.269|0.772	0	.
chr1	36595370	36596534	P39_cKOvsControl_cKO_hypo_dmr_3200|24|0.132|0.659	0	.
chr1	36599879	36600157	P39_cKOvsControl_cKO_hypo_dmr_3201|8|0.148|0.537	0	.
chr1	36602071	36602446	P39_cKOvsControl_cKO_hypo_dmr_3202|12|0.187|0.688	0	.
[truncated: 220,007+ more rows]

## Sheet: Devlopmental DMRs, P0 < P39
chrom	start	end	name (id|num_DMS|mCG_P0_Control|mCG_P39_Control)	score	strand
chr1	3191499	3192142	P0vsP39_P0_hypo_dmr_22|5|0.538|0.842	0	.
chr1	3482623	3482781	P0vsP39_P0_hypo_dmr_94|3|0.276|0.677	0	.
chr1	3634986	3635025	P0vsP39_P0_hypo_dmr_135|3|0.218|0.678	0	.
chr1	3671499	3671670	P0vsP39_P0_hypo_dmr_145|63|0.006|0.357	0	.
chr1	3703216	3703393	P0vsP39_P0_hypo_dmr_149|3|0.024|0.461	0	.
chr1	3842146	3842270	P0vsP39_P0_hypo_dmr_157|6|0.105|0.696	0	.
chr1	4169474	4169516	P0vsP39_P0_hypo_dmr_186|3|0.218|0.744	0	.
chr1	4326640	4326851	P0vsP39_P0_hypo_dmr_201|6|0.142|0.736	0	.
chr1	4409378	4409936	P0vsP39_P0_hypo_dmr_211|7|0.391|0.852	0	.
chr1	4412523	4412782	P0vsP39_P0_hypo_dmr_212|9|0.238|0.610	0	.
chr1	4416955	4417047	P0vsP39_P0_hypo_dmr_214|3|0.164|0.526	0	.
chr1	4481129	4481251	P0vsP39_P0_hypo_dmr_224|5|0.047|0.425	0	.
chr1	4506538	4506875	P0vsP39_P0_hypo_dmr_227|7|0.442|0.822	0	.
chr1	4519630	4519995	P0vsP39_P0_hypo_dmr_228|5|0.456|0.840	0	.
chr1	4543914	4544272	P0vsP39_P0_hypo_dmr_229|12|0.331|0.819	0	.
chr1	4611800	4612097	P0vsP39_P0_hypo_dmr_234|10|0.091|0.560	0	.
chr1	4640988	4641296	P0vsP39_P0_hypo_dmr_239|7|0.050|0.588	0	.
chr1	4645135	4645200	P0vsP39_P0_hypo_dmr_240|3|0.493|0.896	0	.
chr1	4725011	4725159	P0vsP39_P0_hypo_dmr_250|8|0.136|0.659	0	.
chr1	4766680	4766980	P0vsP39_P0_hypo_dmr_255|8|0.055|0.362	0	.
chr1	4802678	4802815	P0vsP39_P0_hypo_dmr_262|7|0.163|0.582	0	.
chr1	4820140	4820432	P0vsP39_P0_hypo_dmr_265|9|0.100|0.696	0	.
chr1	4914696	4915017	P0vsP39_P0_hypo_dmr_292|5|0.040|0.604	0	.
chr1	4969803	4970246	P0vsP39_P0_hypo_dmr_302|12|0.103|0.810	0	.
chr1	4970873	4971280	P0vsP39_P0_hypo_dmr_303|8|0.018|0.389	0	.
chr1	5012900	5013143	P0vsP39_P0_hypo_dmr_312|6|0.106|0.446	0	.
chr1	5024023	5025381	P0vsP39_P0_hypo_dmr_316|19|0.160|0.606	0	.
chr1	5033483	5033622	P0vsP39_P0_hypo_dmr_317|6|0.065|0.566	0	.
chr1	5227870	5228072	P0vsP39_P0_hypo_dmr_367|6|0.051|0.474	0	.
chr1	5232240	5233136	P0vsP39_P0_hypo_dmr_369|5|0.052|0.403	0	.
chr1	5588221	5588367	P0vsP39_P0_hypo_dmr_401|8|0.010|0.380	0	.
chr1	6136894	6137611	P0vsP39_P0_hypo_dmr_435|6|0.389|0.757	0	.
chr1	6142894	6143299	P0vsP39_P0_hypo_dmr_436|5|0.305|0.662	0	.
chr1	6360468	6360486	P0vsP39_P0_hypo_dmr_477|4|0.509|0.925	0	.
chr1	6366978	6367080	P0vsP39_P0_hypo_dmr_480|3|0.523|0.886	0	.
chr1	6447782	6448564	P0vsP39_P0_hypo_dmr_485|6|0.432|0.744	0	.
chr1	6454543	6454605	P0vsP39_P0_hypo_dmr_487|4|0.424|0.861	0	.
chr1	6479518	6479866	P0vsP39_P0_hypo_dmr_489|3|0.566|0.889	0	.
chr1	6510527	6510599	P0vsP39_P0_hypo_dmr_496|3|0.360|0.856	0	.
chr1	6526609	6527294	P0vsP39_P0_hypo_dmr_497|8|0.436|0.838	0	.
chr1	6706450	6706598	P0vsP39_P0_hypo_dmr_510|5|0.309|0.662	0	.
chr1	6718020	6718048	P0vsP39_P0_hypo_dmr_512|4|0.103|0.531	0	.
chr1	6728974	6730122	P0vsP39_P0_hypo_dmr_513|32|0.037|0.456	0	.
chr1	6733678	6735640	P0vsP39_P0_hypo_dmr_514|32|0.101|0.550	0	.
chr1	6736246	6736565	P0vsP39_P0_hypo_dmr_515|4|0.517|0.821	0	.
chr1	6739157	6739344	P0vsP39_P0_hypo_dmr_516|3|0.191|0.649	0	.
chr1	6751197	6751296	P0vsP39_P0_hypo_dmr_518|5|0.407|0.876	0	.
chr1	6751900	6752403	P0vsP39_P0_hypo_dmr_519|4|0.135|0.824	0	.
chr1	6757651	6757891	P0vsP39_P0_hypo_dmr_520|8|0.198|0.818	0	.
chr1	6759477	6759585	P0vsP39_P0_hypo_dmr_521|3|0.303|0.901	0	.
chr1	6767624	6767857	P0vsP39_P0_hypo_dmr_523|4|0.579|0.906	0	.
chr1	6787356	6787411	P0vsP39_P0_hypo_dmr_525|3|0.519|0.893	0	.
chr1	6800219	6800284	P0vsP39_P0_hypo_dmr_526|8|0.135|0.801	0	.
chr1	6805204	6806045	P0vsP39_P0_hypo_dmr_529|12|0.428|0.809	0	.
chr1	6809281	6809297	P0vsP39_P0_hypo_dmr_530|3|0.568|0.908	0	.
chr1	6825149	6825340	P0vsP39_P0_hypo_dmr_533|5|0.269|0.639	0	.
chr1	6830192	6830353	P0vsP39_P0_hypo_dmr_534|6|0.242|0.679	0	.
chr1	6869667	6869833	P0vsP39_P0_hypo_dmr_536|4|0.266|0.800	0	.
chr1	6870664	6870752	P0vsP39_P0_hypo_dmr_537|4|0.332|0.810	0	.
chr1	6898313	6898619	P0vsP39_P0_hypo_dmr_538|6|0.328|0.877	0	.
chr1	6937076	6937714	P0vsP39_P0_hypo_dmr_542|7|0.483|0.804	0	.
chr1	7054939	7055129	P0vsP39_P0_hypo_dmr_552|3|0.543|0.896	0	.
chr1	7201725	7201903	P0vsP39_P0_hypo_dmr_586|4|0.347|0.778	0	.
chr1	7225144	7225293	P0vsP39_P0_hypo_dmr_590|4|0.094|0.716	0	.
chr1	7309549	7309616	P0vsP39_P0_hypo_dmr_598|3|0.426|0.893	0	.
chr1	7319024	7319700	P0vsP39_P0_hypo_dmr_601|8|0.056|0.408	0	.
chr1	7421490	7421508	P0vsP39_P0_hypo_dmr_610|3|0.051|0.403	0	.
chr1	7777031	7778420	P0vsP39_P0_hypo_dmr_644|20|0.077|0.467	0	.
chr1	7971658	7971729	P0vsP39_P0_hypo_dmr_667|3|0.423|0.750	0	.
chr1	8557924	8558148	P0vsP39_P0_hypo_dmr_711|4|0.025|0.662	0	.
chr1	8565404	8565552	P0vsP39_P0_hypo_dmr_713|6|0.275|0.800	0	.
chr1	8581726	8582501	P0vsP39_P0_hypo_dmr_716|20|0.073|0.729	0	.
chr1	8904671	8905093	P0vsP39_P0_hypo_dmr_749|9|0.242|0.689	0	.
chr1	8912497	8912528	P0vsP39_P0_hypo_dmr_751|4|0.062|0.604	0	.
chr1	8915010	8916285	P0vsP39_P0_hypo_dmr_752|14|0.130|0.669	0	.
chr1	8938095	8939279	P0vsP39_P0_hypo_dmr_758|24|0.126|0.726	0	.
chr1	9205738	9206164	P0vsP39_P0_hypo_dmr_792|6|0.293|0.774	0	.
chr1	9289866	9290400	P0vsP39_P0_hypo_dmr_802|11|0.103|0.462	0	.
chr1	9517163	9517363	P0vsP39_P0_hypo_dmr_821|4|0.151|0.649	0	.
chr1	9526878	9526945	P0vsP39_P0_hypo_dmr_822|3|0.460|0.854	0	.
chr1	9564504	9565351	P0vsP39_P0_hypo_dmr_831|14|0.244|0.632	0	.
chr1	9576200	9576358	P0vsP39_P0_hypo_dmr_835|10|0.272|0.856	0	.
chr1	9583727	9584407	P0vsP39_P0_hypo_dmr_837|19|0.080|0.749	0	.
chr1	9622575	9623076	P0vsP39_P0_hypo_dmr_852|6|0.069|0.381	0	.
chr1	9648848	9649646	P0vsP39_P0_hypo_dmr_861|46|0.180|0.808	0	.
chr1	9652502	9652712	P0vsP39_P0_hypo_dmr_862|3|0.221|0.634	0	.
chr1	9658579	9659272	P0vsP39_P0_hypo_dmr_864|24|0.292|0.786	0	.
chr1	9774293	9774417	P0vsP39_P0_hypo_dmr_894|5|0.252|0.670	0	.
chr1	9776958	9777069	P0vsP39_P0_hypo_dmr_896|4|0.231|0.746	0	.
chr1	9782166	9782241	P0vsP39_P0_hypo_dmr_897|3|0.521|0.921	0	.
chr1	9805636	9805741	P0vsP39_P0_hypo_dmr_906|6|0.216|0.634	0	.
chr1	9841903	9842372	P0vsP39_P0_hypo_dmr_916|10|0.475|0.813	0	.
chr1	9851508	9851561	P0vsP39_P0_hypo_dmr_920|3|0.430|0.843	0	.
chr1	9880429	9880525	P0vsP39_P0_hypo_dmr_930|5|0.544|0.899	0	.
chr1	9953211	9953744	P0vsP39_P0_hypo_dmr_952|11|0.186|0.568	0	.
chr1	10115983	10116362	P0vsP39_P0_hypo_dmr_1014|10|0.255|0.640	0	.
chr1	10262911	10263089	P0vsP39_P0_hypo_dmr_1064|3|0.505|0.816	0	.
chr1	10281643	10281728	P0vsP39_P0_hypo_dmr_1066|3|0.576|0.937	0	.
chr1	10285427	10285486	P0vsP39_P0_hypo_dmr_1067|3|0.506|0.880	0	.
chr1	10337917	10338042	P0vsP39_P0_hypo_dmr_1077|5|0.453|0.774	0	.
chr1	10338630	10338801	P0vsP39_P0_hypo_dmr_1078|3|0.098|0.550	0	.
chr1	10372346	10372497	P0vsP39_P0_hypo_dmr_1082|4|0.361|0.786	0	.
chr1	10397435	10397934	P0vsP39_P0_hypo_dmr_1086|3|0.354|0.763	0	.
chr1	10403806	10404143	P0vsP39_P0_hypo_dmr_1088|6|0.364|0.677	0	.
chr1	10477056	10477114	P0vsP39_P0_hypo_dmr_1095|8|0.217|0.848	0	.
chr1	10591044	10591504	P0vsP39_P0_hypo_dmr_1107|6|0.141|0.709	0	.
chr1	10595370	10595423	P0vsP39_P0_hypo_dmr_1109|3|0.398|0.802	0	.
chr1	10681871	10682246	P0vsP39_P0_hypo_dmr_1117|16|0.275|0.849	0	.
chr1	10707814	10707916	P0vsP39_P0_hypo_dmr_1122|3|0.287|0.771	0	.
chr1	10794094	10794676	P0vsP39_P0_hypo_dmr_1131|12|0.021|0.664	0	.
chr1	10871868	10871969	P0vsP39_P0_hypo_dmr_1138|3|0.218|0.552	0	.
chr1	10918891	10919028	P0vsP39_P0_hypo_dmr_1145|3|0.086|0.507	0	.
chr1	10919686	10920232	P0vsP39_P0_hypo_dmr_1146|7|0.156|0.619	0	.
chr1	10938339	10938631	P0vsP39_P0_hypo_dmr_1147|5|0.286|0.776	0	.
chr1	10943062	10943091	P0vsP39_P0_hypo_dmr_1148|6|0.120|0.499	0	.
chr1	10953415	10953510	P0vsP39_P0_hypo_dmr_1151|6|0.339|0.770	0	.
chr1	10990909	10991232	P0vsP39_P0_hypo_dmr_1154|5|0.070|0.709	0	.
chr1	11018779	11019263	P0vsP39_P0_hypo_dmr_1156|8|0.426|0.749	0	.
chr1	11024774	11025312	P0vsP39_P0_hypo_dmr_1157|12|0.148|0.643	0	.
chr1	11033706	11033740	P0vsP39_P0_hypo_dmr_1160|4|0.102|0.455	0	.
chr1	11035179	11035231	P0vsP39_P0_hypo_dmr_1161|5|0.519|0.935	0	.
chr1	11046038	11046643	P0vsP39_P0_hypo_dmr_1164|5|0.187|0.687	0	.
chr1	11058850	11058900	P0vsP39_P0_hypo_dmr_1167|4|0.298|0.801	0	.
chr1	11066204	11066438	P0vsP39_P0_hypo_dmr_1169|5|0.111|0.533	0	.
chr1	11089670	11089883	P0vsP39_P0_hypo_dmr_1172|10|0.090|0.636	0	.
chr1	11090986	11091185	P0vsP39_P0_hypo_dmr_1173|4|0.249|0.768	0	.
chr1	11105453	11105600	P0vsP39_P0_hypo_dmr_1175|5|0.085|0.748	0	.
chr1	11274242	11274280	P0vsP39_P0_hypo_dmr_1204|4|0.480|0.882	0	.
chr1	11277212	11278413	P0vsP39_P0_hypo_dmr_1205|21|0.237|0.685	0	.
chr1	11323589	11323642	P0vsP39_P0_hypo_dmr_1208|3|0.445|0.843	0	.
chr1	11404856	11404983	P0vsP39_P0_hypo_dmr_1216|5|0.488|0.872	0	.
chr1	11411917	11412027	P0vsP39_P0_hypo_dmr_1218|6|0.240|0.672	0	.
chr1	11643823	11643887	P0vsP39_P0_hypo_dmr_1264|4|0.404|0.855	0	.
chr1	11748052	11748833	P0vsP39_P0_hypo_dmr_1273|9|0.161|0.586	0	.
chr1	11749334	11749373	P0vsP39_P0_hypo_dmr_1274|3|0.622|0.936	0	.
chr1	11758960	11759701	P0vsP39_P0_hypo_dmr_1276|11|0.426|0.785	0	.
chr1	11774889	11775080	P0vsP39_P0_hypo_dmr_1277|3|0.245|0.557	0	.
chr1	11931585	11931986	P0vsP39_P0_hypo_dmr_1301|6|0.073|0.663	0	.
chr1	11937059	11937285	P0vsP39_P0_hypo_dmr_1303|12|0.108|0.468	0	.
chr1	11967214	11967655	P0vsP39_P0_hypo_dmr_1307|8|0.436|0.858	0	.
chr1	11983458	11983569	P0vsP39_P0_hypo_dmr_1309|6|0.114|0.666	0	.
chr1	12000630	12000887	P0vsP39_P0_hypo_dmr_1313|8|0.026|0.501	0	.
chr1	12055455	12056304	P0vsP39_P0_hypo_dmr_1318|8|0.162|0.712	0	.
chr1	12192539	12193189	P0vsP39_P0_hypo_dmr_1324|6|0.392|0.699	0	.
chr1	12225503	12225539	P0vsP39_P0_hypo_dmr_1326|3|0.078|0.401	0	.
chr1	12250453	12250919	P0vsP39_P0_hypo_dmr_1329|4|0.246|0.740	0	.
chr1	12398293	12398786	P0vsP39_P0_hypo_dmr_1349|11|0.143|0.626	0	.
chr1	12410035	12410442	P0vsP39_P0_hypo_dmr_1350|12|0.010|0.537	0	.
chr1	12435977	12436667	P0vsP39_P0_hypo_dmr_1353|5|0.384|0.839	0	.
chr1	12509902	12509962	P0vsP39_P0_hypo_dmr_1364|8|0.162|0.497	0	.
chr1	12542241	12542445	P0vsP39_P0_hypo_dmr_1371|4|0.254|0.745	0	.
chr1	12577101	12577490	P0vsP39_P0_hypo_dmr_1378|21|0.025|0.647	0	.
chr1	12582750	12583652	P0vsP39_P0_hypo_dmr_1379|8|0.409|0.845	0	.
chr1	12587697	12587969	P0vsP39_P0_hypo_dmr_1381|9|0.421|0.846	0	.
chr1	12589105	12589115	P0vsP39_P0_hypo_dmr_1383|3|0.305|0.751	0	.
chr1	12622503	12622673	P0vsP39_P0_hypo_dmr_1390|3|0.151|0.540	0	.
chr1	12636388	12637890	P0vsP39_P0_hypo_dmr_1393|23|0.228|0.722	0	.
chr1	12670952	12672162	P0vsP39_P0_hypo_dmr_1398|27|0.278|0.715	0	.
chr1	12675587	12675878	P0vsP39_P0_hypo_dmr_1399|7|0.254|0.743	0	.
chr1	12693700	12693818	P0vsP39_P0_hypo_dmr_1402|4|0.027|0.491	0	.
chr1	12697770	12698434	P0vsP39_P0_hypo_dmr_1403|17|0.229|0.600	0	.
chr1	12704161	12704905	P0vsP39_P0_hypo_dmr_1405|10|0.409|0.732	0	.
chr1	12711029	12711295	P0vsP39_P0_hypo_dmr_1406|4|0.252|0.665	0	.
chr1	12713461	12713768	P0vsP39_P0_hypo_dmr_1408|12|0.571|0.938	0	.
chr1	12744598	12745304	P0vsP39_P0_hypo_dmr_1418|13|0.149|0.730	0	.
chr1	12749190	12749326	P0vsP39_P0_hypo_dmr_1420|3|0.552|0.866	0	.
chr1	12754030	12754496	P0vsP39_P0_hypo_dmr_1424|7|0.212|0.551	0	.
chr1	12775722	12776507	P0vsP39_P0_hypo_dmr_1429|15|0.379|0.784	0	.
chr1	12781398	12782059	P0vsP39_P0_hypo_dmr_1430|17|0.468|0.886	0	.
chr1	12785222	12785512	P0vsP39_P0_hypo_dmr_1431|8|0.069|0.401	0	.
chr1	12794900	12796097	P0vsP39_P0_hypo_dmr_1436|17|0.266|0.581	0	.
chr1	12806279	12806721	P0vsP39_P0_hypo_dmr_1441|19|0.223|0.820	0	.
chr1	12807475	12808211	P0vsP39_P0_hypo_dmr_1442|15|0.437|0.749	0	.
chr1	12811272	12812452	P0vsP39_P0_hypo_dmr_1444|25|0.229|0.841	0	.
chr1	12814251	12815564	P0vsP39_P0_hypo_dmr_1445|28|0.431|0.826	0	.
chr1	12819122	12819204	P0vsP39_P0_hypo_dmr_1446|4|0.437|0.797	0	.
chr1	12826067	12826403	P0vsP39_P0_hypo_dmr_1449|10|0.104|0.567	0	.
chr1	12865923	12866154	P0vsP39_P0_hypo_dmr_1457|4|0.577|0.915	0	.
chr1	12871599	12872258	P0vsP39_P0_hypo_dmr_1460|16|0.481|0.915	0	.
chr1	12872848	12872897	P0vsP39_P0_hypo_dmr_1461|5|0.557|0.962	0	.
chr1	12875631	12876345	P0vsP39_P0_hypo_dmr_1463|26|0.205|0.568	0	.
chr1	12929958	12930028	P0vsP39_P0_hypo_dmr_1470|4|0.547|0.925	0	.
chr1	12943580	12943608	P0vsP39_P0_hypo_dmr_1474|3|0.219|0.722	0	.
chr1	12969782	12970186	P0vsP39_P0_hypo_dmr_1480|7|0.426|0.818	0	.
chr1	12987266	12987320	P0vsP39_P0_hypo_dmr_1484|4|0.293|0.723	0	.
chr1	13004880	13005563	P0vsP39_P0_hypo_dmr_1488|16|0.058|0.524	0	.
chr1	13074267	13075079	P0vsP39_P0_hypo_dmr_1498|22|0.120|0.817	0	.
chr1	13078154	13078429	P0vsP39_P0_hypo_dmr_1499|5|0.352|0.691	0	.
chr1	13081289	13081548	P0vsP39_P0_hypo_dmr_1500|6|0.098|0.608	0	.
chr1	13093455	13093569	P0vsP39_P0_hypo_dmr_1503|6|0.285|0.606	0	.
chr1	13097916	13098015	P0vsP39_P0_hypo_dmr_1505|3|0.368|0.861	0	.
chr1	13111449	13111948	P0vsP39_P0_hypo_dmr_1508|5|0.313|0.735	0	.
chr1	13116777	13116789	P0vsP39_P0_hypo_dmr_1510|3|0.366|0.816	0	.
chr1	13121896	13122330	P0vsP39_P0_hypo_dmr_1512|7|0.627|0.961	0	.
chr1	13128537	13129926	P0vsP39_P0_hypo_dmr_1514|30|0.102|0.495	0	.
chr1	13131663	13133039	P0vsP39_P0_hypo_dmr_1515|12|0.459|0.890	0	.
chr1	13152772	13152989	P0vsP39_P0_hypo_dmr_1521|5|0.351|0.656	0	.
chr1	13171236	13171387	P0vsP39_P0_hypo_dmr_1530|8|0.051|0.497	0	.
chr1	13183230	13183359	P0vsP39_P0_hypo_dmr_1536|7|0.409|0.780	0	.
chr1	13184981	13185214	P0vsP39_P0_hypo_dmr_1538|8|0.146|0.696	0	.
chr1	13223469	13223524	P0vsP39_P0_hypo_dmr_1552|3|0.414|0.813	0	.
chr1	13290262	13290290	P0vsP39_P0_hypo_dmr_1575|3|0.074|0.594	0	.
chr1	13291385	13291439	P0vsP39_P0_hypo_dmr_1576|6|0.117|0.723	0	.
chr1	13312244	13312525	P0vsP39_P0_hypo_dmr_1588|3|0.503|0.815	0	.
chr1	13314169	13314349	P0vsP39_P0_hypo_dmr_1590|10|0.054|0.507	0	.
chr1	13333579	13333997	P0vsP39_P0_hypo_dmr_1599|4|0.124|0.559	0	.
chr1	13340587	13340710	P0vsP39_P0_hypo_dmr_1603|6|0.647|0.948	0	.
chr1	13352747	13352821	P0vsP39_P0_hypo_dmr_1608|3|0.239|0.699	0	.
chr1	13358551	13358605	P0vsP39_P0_hypo_dmr_1612|3|0.564|0.933	0	.
chr1	13375488	13375956	P0vsP39_P0_hypo_dmr_1618|4|0.253|0.566	0	.
chr1	13389253	13389287	P0vsP39_P0_hypo_dmr_1623|3|0.136|0.556	0	.
chr1	13390369	13390660	P0vsP39_P0_hypo_dmr_1624|5|0.536|0.845	0	.
chr1	13416437	13416735	P0vsP39_P0_hypo_dmr_1627|3|0.403|0.791	0	.
chr1	13488486	13488846	P0vsP39_P0_hypo_dmr_1642|5|0.540|0.878	0	.
chr1	13490058	13490273	P0vsP39_P0_hypo_dmr_1643|6|0.421|0.846	0	.
chr1	13496611	13496766	P0vsP39_P0_hypo_dmr_1645|3|0.271|0.689	0	.
chr1	13499986	13500047	P0vsP39_P0_hypo_dmr_1646|5|0.436|0.826	0	.
chr1	13507634	13507666	P0vsP39_P0_hypo_dmr_1647|3|0.220|0.845	0	.
chr1	13530844	13531781	P0vsP39_P0_hypo_dmr_1650|23|0.311|0.627	0	.
chr1	13684135	13684170	P0vsP39_P0_hypo_dmr_1685|3|0.243|0.747	0	.
chr1	13707081	13707125	P0vsP39_P0_hypo_dmr_1688|3|0.429|0.832	0	.
chr1	13779184	13779199	P0vsP39_P0_hypo_dmr_1697|4|0.187|0.720	0	.
chr1	13787300	13788277	P0vsP39_P0_hypo_dmr_1700|16|0.542|0.854	0	.
chr1	13825242	13825294	P0vsP39_P0_hypo_dmr_1706|3|0.603|0.978	0	.
chr1	13858540	13862916	P0vsP39_P0_hypo_dmr_1713|45|0.419|0.848	0	.
chr1	13931084	13931225	P0vsP39_P0_hypo_dmr_1722|9|0.212|0.661	0	.
chr1	13931751	13931799	P0vsP39_P0_hypo_dmr_1723|3|0.482|0.862	0	.
chr1	13935221	13936679	P0vsP39_P0_hypo_dmr_1724|19|0.195|0.628	0	.
chr1	13992469	13993284	P0vsP39_P0_hypo_dmr_1729|16|0.281|0.618	0	.
chr1	14000666	14001081	P0vsP39_P0_hypo_dmr_1731|6|0.080|0.741	0	.
chr1	14001643	14002165	P0vsP39_P0_hypo_dmr_1732|7|0.311|0.869	0	.
chr1	14009959	14010156	P0vsP39_P0_hypo_dmr_1734|5|0.283|0.758	0	.
chr1	14011056	14012219	P0vsP39_P0_hypo_dmr_1735|22|0.444|0.829	0	.
chr1	14096639	14097051	P0vsP39_P0_hypo_dmr_1741|4|0.252|0.799	0	.
chr1	14097679	14098095	P0vsP39_P0_hypo_dmr_1742|10|0.067|0.861	0	.
chr1	14099071	14099381	P0vsP39_P0_hypo_dmr_1743|10|0.194|0.935	0	.
chr1	14108394	14109613	P0vsP39_P0_hypo_dmr_1746|22|0.118|0.456	0	.
chr1	14129273	14130192	P0vsP39_P0_hypo_dmr_1749|10|0.209|0.715	0	.
chr1	14139735	14140421	P0vsP39_P0_hypo_dmr_1751|16|0.201|0.855	0	.
chr1	14179667	14179672	P0vsP39_P0_hypo_dmr_1759|4|0.343|0.930	0	.
chr1	14180256	14180486	P0vsP39_P0_hypo_dmr_1760|8|0.312|0.889	0	.
chr1	14181355	14181905	P0vsP39_P0_hypo_dmr_1761|16|0.184|0.705	0	.
chr1	14184325	14185616	P0vsP39_P0_hypo_dmr_1762|29|0.063|0.445	0	.
chr1	14189113	14190083	P0vsP39_P0_hypo_dmr_1764|17|0.350|0.776	0	.
chr1	14191288	14191516	P0vsP39_P0_hypo_dmr_1766|5|0.381|0.734	0	.
chr1	14192407	14193727	P0vsP39_P0_hypo_dmr_1767|29|0.359|0.834	0	.
chr1	14218899	14219134	P0vsP39_P0_hypo_dmr_1771|11|0.458|0.891	0	.
chr1	14220488	14220576	P0vsP39_P0_hypo_dmr_1772|3|0.364|0.805	0	.
chr1	14225436	14226379	P0vsP39_P0_hypo_dmr_1773|7|0.200|0.634	0	.
chr1	14244924	14245181	P0vsP39_P0_hypo_dmr_1777|8|0.168|0.819	0	.
chr1	14254954	14255688	P0vsP39_P0_hypo_dmr_1781|10|0.431|0.761	0	.
chr1	14270552	14270638	P0vsP39_P0_hypo_dmr_1784|3|0.680|0.986	0	.
chr1	14285344	14285854	P0vsP39_P0_hypo_dmr_1786|11|0.319|0.762	0	.
chr1	14290975	14292853	P0vsP39_P0_hypo_dmr_1788|16|0.279|0.765	0	.
chr1	14293955	14294765	P0vsP39_P0_hypo_dmr_1789|18|0.162|0.704	0	.
chr1	14298012	14298408	P0vsP39_P0_hypo_dmr_1791|8|0.284|0.696	0	.
chr1	14302645	14303630	P0vsP39_P0_hypo_dmr_1793|26|0.250|0.593	0	.
chr1	14305525	14305597	P0vsP39_P0_hypo_dmr_1794|4|0.217|0.610	0	.
chr1	14307137	14309473	P0vsP39_P0_hypo_dmr_1796|43|0.172|0.584	0	.
chr1	14310607	14310923	P0vsP39_P0_hypo_dmr_1797|8|0.377|0.687	0	.
chr1	14312541	14312850	P0vsP39_P0_hypo_dmr_1798|9|0.207|0.752	0	.
chr1	14313805	14313906	P0vsP39_P0_hypo_dmr_1799|3|0.158|0.614	0	.
chr1	14339893	14339916	P0vsP39_P0_hypo_dmr_1803|3|0.491|0.875	0	.
chr1	14356402	14356711	P0vsP39_P0_hypo_dmr_1806|11|0.241|0.857	0	.
chr1	14369357	14370197	P0vsP39_P0_hypo_dmr_1808|9|0.511|0.862	0	.
chr1	14370880	14371402	P0vsP39_P0_hypo_dmr_1809|9|0.377|0.824	0	.
chr1	14413996	14414189	P0vsP39_P0_hypo_dmr_1814|6|0.329|0.813	0	.
chr1	14429302	14429724	P0vsP39_P0_hypo_dmr_1816|5|0.209|0.787	0	.
chr1	14431898	14431976	P0vsP39_P0_hypo_dmr_1817|4|0.228|0.781	0	.
chr1	14464453	14465062	P0vsP39_P0_hypo_dmr_1820|10|0.354|0.808	0	.
chr1	14472211	14472848	P0vsP39_P0_hypo_dmr_1821|10|0.092|0.745	0	.
chr1	14512458	14513069	P0vsP39_P0_hypo_dmr_1829|16|0.214|0.647	0	.
chr1	14552765	14552971	P0vsP39_P0_hypo_dmr_1831|3|0.148|0.535	0	.
chr1	14565680	14567200	P0vsP39_P0_hypo_dmr_1833|22|0.406|0.854	0	.
chr1	14573596	14573617	P0vsP39_P0_hypo_dmr_1835|4|0.364|0.789	0	.
chr1	14588444	14588635	P0vsP39_P0_hypo_dmr_1840|4|0.443|0.784	0	.
chr1	14631784	14632257	P0vsP39_P0_hypo_dmr_1848|9|0.506|0.806	0	.
chr1	14634425	14634624	P0vsP39_P0_hypo_dmr_1849|3|0.559|0.895	0	.
chr1	14678887	14679157	P0vsP39_P0_hypo_dmr_1855|5|0.534|0.844	0	.
chr1	14679549	14679647	P0vsP39_P0_hypo_dmr_1856|4|0.451|0.764	0	.
chr1	14708253	14708553	P0vsP39_P0_hypo_dmr_1862|9|0.342|0.836	0	.
chr1	14753098	14753121	P0vsP39_P0_hypo_dmr_1867|3|0.593|0.921	0	.
chr1	14756755	14757898	P0vsP39_P0_hypo_dmr_1869|17|0.102|0.404	0	.
chr1	14869659	14869895	P0vsP39_P0_hypo_dmr_1876|6|0.360|0.845	0	.
chr1	14903201	14903472	P0vsP39_P0_hypo_dmr_1885|10|0.369|0.792	0	.
chr1	14908901	14909728	P0vsP39_P0_hypo_dmr_1887|8|0.183|0.867	0	.
chr1	14920220	14920986	P0vsP39_P0_hypo_dmr_1890|8|0.504|0.838	0	.
chr1	15054113	15054125	P0vsP39_P0_hypo_dmr_1902|3|0.309|0.680	0	.
chr1	15129040	15129443	P0vsP39_P0_hypo_dmr_1906|12|0.037|0.763	0	.
chr1	15148451	15148726	P0vsP39_P0_hypo_dmr_1909|3|0.424|0.818	0	.
chr1	15332586	15333014	P0vsP39_P0_hypo_dmr_1934|4|0.414|0.825	0	.
chr1	15383772	15383932	P0vsP39_P0_hypo_dmr_1941|4|0.126|0.645	0	.
chr1	15466197	15466268	P0vsP39_P0_hypo_dmr_1951|3|0.333|0.794	0	.
chr1	15568532	15568935	P0vsP39_P0_hypo_dmr_1971|6|0.285|0.629	0	.
chr1	15578555	15578583	P0vsP39_P0_hypo_dmr_1973|6|0.098|0.605	0	.
chr1	15592795	15592932	P0vsP39_P0_hypo_dmr_1976|6|0.315|0.869	0	.
chr1	15603365	15603477	P0vsP39_P0_hypo_dmr_1978|4|0.174|0.764	0	.
chr1	15632999	15633093	P0vsP39_P0_hypo_dmr_1986|3|0.309|0.831	0	.
chr1	15636696	15637662	P0vsP39_P0_hypo_dmr_1987|8|0.262|0.660	0	.
chr1	15651861	15652262	P0vsP39_P0_hypo_dmr_1991|14|0.046|0.425	0	.
chr1	15768539	15769055	P0vsP39_P0_hypo_dmr_2009|10|0.309|0.854	0	.
chr1	15776319	15776342	P0vsP39_P0_hypo_dmr_2011|3|0.184|0.524	0	.
chr1	15880919	15881023	P0vsP39_P0_hypo_dmr_2032|4|0.307|0.698	0	.
chr1	15908329	15908877	P0vsP39_P0_hypo_dmr_2044|5|0.385|0.828	0	.
chr1	15913463	15913638	P0vsP39_P0_hypo_dmr_2045|6|0.483|0.870	0	.
chr1	15925862	15926386	P0vsP39_P0_hypo_dmr_2048|7|0.523|0.938	0	.
chr1	15994129	15994512	P0vsP39_P0_hypo_dmr_2055|6|0.374|0.842	0	.
chr1	16058510	16058858	P0vsP39_P0_hypo_dmr_2065|7|0.217|0.613	0	.
chr1	16112416	16112627	P0vsP39_P0_hypo_dmr_2075|4|0.384|0.750	0	.
chr1	16122960	16123271	P0vsP39_P0_hypo_dmr_2079|5|0.415|0.797	0	.
chr1	16130567	16132539	P0vsP39_P0_hypo_dmr_2083|25|0.535|0.849	0	.
chr1	16172965	16173128	P0vsP39_P0_hypo_dmr_2087|3|0.467|0.780	0	.
chr1	16178880	16179260	P0vsP39_P0_hypo_dmr_2089|5|0.105|0.718	0	.
chr1	16185963	16186639	P0vsP39_P0_hypo_dmr_2092|6|0.334|0.732	0	.
chr1	16202354	16202769	P0vsP39_P0_hypo_dmr_2095|4|0.084|0.385	0	.
chr1	16236329	16236803	P0vsP39_P0_hypo_dmr_2101|7|0.277|0.596	0	.
chr1	16265054	16265811	P0vsP39_P0_hypo_dmr_2113|9|0.538|0.876	0	.
chr1	16277914	16278077	P0vsP39_P0_hypo_dmr_2120|4|0.623|0.939	0	.
chr1	16295968	16296384	P0vsP39_P0_hypo_dmr_2125|12|0.286|0.775	0	.
chr1	16300631	16300957	P0vsP39_P0_hypo_dmr_2127|3|0.150|0.584	0	.
chr1	16301835	16302609	P0vsP39_P0_hypo_dmr_2128|13|0.120|0.516	0	.
chr1	16483676	16483865	P0vsP39_P0_hypo_dmr_2163|4|0.351|0.709	0	.
chr1	16780750	16780977	P0vsP39_P0_hypo_dmr_2240|3|0.220|0.657	0	.
chr1	16800431	16800516	P0vsP39_P0_hypo_dmr_2244|5|0.502|0.847	0	.
chr1	16824148	16825176	P0vsP39_P0_hypo_dmr_2249|29|0.161|0.760	0	.
chr1	17061006	17061061	P0vsP39_P0_hypo_dmr_2294|4|0.102|0.599	0	.
chr1	17116540	17117258	P0vsP39_P0_hypo_dmr_2310|8|0.033|0.580	0	.
chr1	17207512	17207558	P0vsP39_P0_hypo_dmr_2322|4|0.259|0.709	0	.
chr1	17308888	17308966	P0vsP39_P0_hypo_dmr_2326|3|0.397|0.876	0	.
chr1	17309761	17309779	P0vsP39_P0_hypo_dmr_2327|3|0.300|0.735	0	.
chr1	17416036	17416574	P0vsP39_P0_hypo_dmr_2335|9|0.148|0.673	0	.
chr1	17489710	17489837	P0vsP39_P0_hypo_dmr_2341|8|0.548|0.901	0	.
chr1	17657650	17657678	P0vsP39_P0_hypo_dmr_2351|4|0.106|0.713	0	.
chr1	17663363	17663763	P0vsP39_P0_hypo_dmr_2352|3|0.503|0.885	0	.
chr1	17687071	17687822	P0vsP39_P0_hypo_dmr_2355|4|0.304|0.688	0	.
chr1	17827306	17827407	P0vsP39_P0_hypo_dmr_2366|4|0.500|0.961	0	.
chr1	18026323	18026501	P0vsP39_P0_hypo_dmr_2378|4|0.266|0.812	0	.
chr1	18029282	18029397	P0vsP39_P0_hypo_dmr_2379|4|0.186|0.873	0	.
chr1	18054137	18054350	P0vsP39_P0_hypo_dmr_2381|3|0.198|0.589	0	.
chr1	18056972	18057139	P0vsP39_P0_hypo_dmr_2382|5|0.208|0.658	0	.
chr1	18191806	18192273	P0vsP39_P0_hypo_dmr_2391|10|0.108|0.494	0	.
chr1	18271445	18271474	P0vsP39_P0_hypo_dmr_2398|3|0.494|0.925	0	.
chr1	18292437	18292672	P0vsP39_P0_hypo_dmr_2400|6|0.066|0.485	0	.
chr1	18313678	18313785	P0vsP39_P0_hypo_dmr_2405|3|0.273|0.705	0	.
chr1	18350937	18350954	P0vsP39_P0_hypo_dmr_2408|3|0.253|0.716	0	.
chr1	18386410	18386916	P0vsP39_P0_hypo_dmr_2413|7|0.111|0.654	0	.
chr1	18415667	18416795	P0vsP39_P0_hypo_dmr_2415|15|0.066|0.643	0	.
chr1	18462273	18462364	P0vsP39_P0_hypo_dmr_2417|4|0.118|0.831	0	.
chr1	18463527	18466297	P0vsP39_P0_hypo_dmr_2418|23|0.302|0.685	0	.
chr1	18512299	18513358	P0vsP39_P0_hypo_dmr_2424|22|0.221|0.700	0	.
chr1	18523070	18523130	P0vsP39_P0_hypo_dmr_2427|3|0.324|0.764	0	.
chr1	18567242	18567371	P0vsP39_P0_hypo_dmr_2431|3|0.210|0.656	0	.
chr1	18599069	18599320	P0vsP39_P0_hypo_dmr_2437|10|0.037|0.705	0	.
chr1	18600288	18600298	P0vsP39_P0_hypo_dmr_2438|3|0.361|0.779	0	.
chr1	18639350	18640016	P0vsP39_P0_hypo_dmr_2442|18|0.032|0.654	0	.
chr1	18752988	18753013	P0vsP39_P0_hypo_dmr_2449|4|0.284|0.752	0	.
chr1	18755442	18755526	P0vsP39_P0_hypo_dmr_2450|4|0.237|0.625	0	.
chr1	18767668	18767796	P0vsP39_P0_hypo_dmr_2454|6|0.059|0.509	0	.
chr1	18791361	18791520	P0vsP39_P0_hypo_dmr_2458|3|0.133|0.664	0	.
chr1	19081363	19081479	P0vsP39_P0_hypo_dmr_2481|4|0.413|0.841	0	.
chr1	19088172	19088430	P0vsP39_P0_hypo_dmr_2482|14|0.030|0.453	0	.
chr1	19096197	19096841	P0vsP39_P0_hypo_dmr_2483|18|0.116|0.564	0	.
chr1	19099995	19100037	P0vsP39_P0_hypo_dmr_2485|3|0.022|0.372	0	.
chr1	19216423	19216764	P0vsP39_P0_hypo_dmr_2498|4|0.088|0.404	0	.
chr1	19244608	19245361	P0vsP39_P0_hypo_dmr_2500|15|0.047|0.624	0	.
chr1	19246975	19247057	P0vsP39_P0_hypo_dmr_2501|3|0.458|0.828	0	.
chr1	19303991	19304057	P0vsP39_P0_hypo_dmr_2505|3|0.457|0.916	0	.
chr1	19337055	19337531	P0vsP39_P0_hypo_dmr_2508|10|0.135|0.712	0	.
chr1	19350401	19350817	P0vsP39_P0_hypo_dmr_2511|10|0.104|0.763	0	.
chr1	19412187	19412645	P0vsP39_P0_hypo_dmr_2515|9|0.159|0.626	0	.
chr1	19473529	19473965	P0vsP39_P0_hypo_dmr_2521|4|0.283|0.693	0	.
chr1	19565855	19566147	P0vsP39_P0_hypo_dmr_2531|4|0.357|0.716	0	.
chr1	19582564	19583947	P0vsP39_P0_hypo_dmr_2532|18|0.329|0.685	0	.
chr1	19620642	19621259	P0vsP39_P0_hypo_dmr_2535|4|0.222|0.565	0	.
chr1	19638851	19639435	P0vsP39_P0_hypo_dmr_2538|10|0.464|0.781	0	.
chr1	19673000	19673253	P0vsP39_P0_hypo_dmr_2541|7|0.223|0.690	0	.
chr1	19673733	19674647	P0vsP39_P0_hypo_dmr_2542|15|0.169|0.605	0	.
chr1	19699422	19700111	P0vsP39_P0_hypo_dmr_2545|18|0.060|0.629	0	.
chr1	19735380	19735579	P0vsP39_P0_hypo_dmr_2552|7|0.110|0.653	0	.
chr1	19741469	19741505	P0vsP39_P0_hypo_dmr_2553|3|0.381|0.941	0	.
chr1	19758082	19758311	P0vsP39_P0_hypo_dmr_2555|6|0.045|0.369	0	.
chr1	19767315	19768801	P0vsP39_P0_hypo_dmr_2557|21|0.426|0.804	0	.
chr1	19774890	19775115	P0vsP39_P0_hypo_dmr_2558|3|0.320|0.706	0	.
chr1	19826588	19827213	P0vsP39_P0_hypo_dmr_2562|11|0.377|0.745	0	.
chr1	19868273	19869031	P0vsP39_P0_hypo_dmr_2568|29|0.098|0.612	0	.
chr1	19870019	19870299	P0vsP39_P0_hypo_dmr_2569|6|0.321|0.667	0	.
chr1	19880686	19881657	P0vsP39_P0_hypo_dmr_2571|14|0.275|0.575	0	.
chr1	19898951	19901238	P0vsP39_P0_hypo_dmr_2574|49|0.276|0.836	0	.
chr1	19912236	19913128	P0vsP39_P0_hypo_dmr_2577|4|0.309|0.613	0	.
chr1	19927765	19928421	P0vsP39_P0_hypo_dmr_2579|11|0.060|0.580	0	.
chr1	19958821	19958841	P0vsP39_P0_hypo_dmr_2583|4|0.306|0.776	0	.
chr1	19964801	19964837	P0vsP39_P0_hypo_dmr_2585|3|0.406|0.872	0	.
chr1	19973476	19974035	P0vsP39_P0_hypo_dmr_2587|9|0.218|0.565	0	.
chr1	19981563	19982262	P0vsP39_P0_hypo_dmr_2589|9|0.247|0.659	0	.
chr1	19982868	19984722	P0vsP39_P0_hypo_dmr_2590|26|0.186|0.783	0	.
chr1	20039512	20039717	P0vsP39_P0_hypo_dmr_2597|5|0.068|0.376	0	.
chr1	20131703	20131926	P0vsP39_P0_hypo_dmr_2607|8|0.315|0.827	0	.
chr1	20143142	20143196	P0vsP39_P0_hypo_dmr_2610|3|0.649|0.952	0	.
chr1	20180181	20180900	P0vsP39_P0_hypo_dmr_2613|16|0.177|0.752	0	.
chr1	20190459	20190689	P0vsP39_P0_hypo_dmr_2614|11|0.070|0.551	0	.
chr1	20216657	20216706	P0vsP39_P0_hypo_dmr_2616|8|0.131|0.834	0	.
chr1	20240501	20240720	P0vsP39_P0_hypo_dmr_2623|6|0.092|0.728	0	.
chr1	20260218	20260527	P0vsP39_P0_hypo_dmr_2624|3|0.249|0.717	0	.
chr1	20288446	20289141	P0vsP39_P0_hypo_dmr_2627|6|0.351|0.698	0	.
chr1	20302408	20303230	P0vsP39_P0_hypo_dmr_2631|17|0.054|0.451	0	.
chr1	20306190	20306317	P0vsP39_P0_hypo_dmr_2632|3|0.437|0.811	0	.
chr1	20344622	20345178	P0vsP39_P0_hypo_dmr_2638|10|0.111|0.766	0	.
chr1	20408715	20410004	P0vsP39_P0_hypo_dmr_2647|24|0.288|0.786	0	.
chr1	20440842	20441214	P0vsP39_P0_hypo_dmr_2650|9|0.182|0.715	0	.
chr1	20457951	20458064	P0vsP39_P0_hypo_dmr_2653|5|0.385|0.839	0	.
chr1	20477439	20477578	P0vsP39_P0_hypo_dmr_2656|7|0.426|0.805	0	.
chr1	20502245	20503335	P0vsP39_P0_hypo_dmr_2659|22|0.377|0.788	0	.
chr1	20503617	20504189	P0vsP39_P0_hypo_dmr_2660|9|0.372|0.759	0	.
chr1	20590456	20590663	P0vsP39_P0_hypo_dmr_2669|5|0.324|0.763	0	.
chr1	20606598	20606735	P0vsP39_P0_hypo_dmr_2671|4|0.436|0.804	0	.
chr1	20665676	20665756	P0vsP39_P0_hypo_dmr_2680|3|0.188|0.727	0	.
chr1	20672102	20672228	P0vsP39_P0_hypo_dmr_2682|4|0.290|0.659	0	.
chr1	20674666	20674712	P0vsP39_P0_hypo_dmr_2683|3|0.308|0.649	0	.
chr1	20677978	20678289	P0vsP39_P0_hypo_dmr_2684|7|0.142|0.664	0	.
chr1	20761386	20761708	P0vsP39_P0_hypo_dmr_2699|7|0.236|0.750	0	.
chr1	20823311	20824743	P0vsP39_P0_hypo_dmr_2710|28|0.075|0.626	0	.
chr1	20845050	20845948	P0vsP39_P0_hypo_dmr_2714|19|0.338|0.781	0	.
chr1	20867503	20868607	P0vsP39_P0_hypo_dmr_2718|33|0.153|0.561	0	.
chr1	20893442	20893814	P0vsP39_P0_hypo_dmr_2727|10|0.287|0.717	0	.
chr1	20898599	20898987	P0vsP39_P0_hypo_dmr_2728|14|0.530|0.884	0	.
chr1	20907537	20909012	P0vsP39_P0_hypo_dmr_2729|25|0.223|0.798	0	.
chr1	20986729	20986857	P0vsP39_P0_hypo_dmr_2754|3|0.180|0.520	0	.
chr1	21002664	21003138	P0vsP39_P0_hypo_dmr_2756|24|0.206|0.835	0	.
chr1	21039322	21039970	P0vsP39_P0_hypo_dmr_2768|7|0.489|0.811	0	.
chr1	21042317	21042415	P0vsP39_P0_hypo_dmr_2769|5|0.574|0.966	0	.
chr1	21072254	21072293	P0vsP39_P0_hypo_dmr_2776|4|0.155|0.760	0	.
chr1	21076163	21076296	P0vsP39_P0_hypo_dmr_2780|10|0.088|0.697	0	.
chr1	21077431	21078783	P0vsP39_P0_hypo_dmr_2781|14|0.491|0.813	0	.
chr1	21089401	21089995	P0vsP39_P0_hypo_dmr_2784|9|0.531|0.845	0	.
chr1	21194511	21194639	P0vsP39_P0_hypo_dmr_2799|4|0.601|0.919	0	.
chr1	21260165	21260214	P0vsP39_P0_hypo_dmr_2807|3|0.532|0.986	0	.
chr1	21364901	21365286	P0vsP39_P0_hypo_dmr_2823|3|0.496|0.895	0	.
chr1	21402930	21403022	P0vsP39_P0_hypo_dmr_2825|6|0.241|0.703	0	.
chr1	21407341	21407444	P0vsP39_P0_hypo_dmr_2827|4|0.086|0.704	0	.
chr1	21418152	21418708	P0vsP39_P0_hypo_dmr_2830|14|0.083|0.568	0	.
chr1	21436276	21437456	P0vsP39_P0_hypo_dmr_2835|16|0.299|0.773	0	.
chr1	21487159	21487290	P0vsP39_P0_hypo_dmr_2848|8|0.088|0.696	0	.
chr1	21594090	21594123	P0vsP39_P0_hypo_dmr_2862|3|0.213|0.710	0	.
chr1	21607592	21607699	P0vsP39_P0_hypo_dmr_2867|6|0.144|0.606	0	.
chr1	21660879	21661273	P0vsP39_P0_hypo_dmr_2883|8|0.055|0.767	0	.
chr1	21673708	21673872	P0vsP39_P0_hypo_dmr_2887|7|0.294|0.812	0	.
chr1	21745218	21745611	P0vsP39_P0_hypo_dmr_2904|4|0.145|0.631	0	.
chr1	21820094	21820628	P0vsP39_P0_hypo_dmr_2924|19|0.068|0.695	0	.
chr1	21850767	21850916	P0vsP39_P0_hypo_dmr_2935|4|0.080|0.598	0	.
chr1	21855988	21856039	P0vsP39_P0_hypo_dmr_2937|6|0.348|0.780	0	.
chr1	21928662	21928739	P0vsP39_P0_hypo_dmr_2952|6|0.151|0.740	0	.
chr1	22036196	22036356	P0vsP39_P0_hypo_dmr_2969|5|0.451|0.784	0	.
chr1	22069692	22070324	P0vsP39_P0_hypo_dmr_2974|8|0.259|0.624	0	.
chr1	22114444	22114476	P0vsP39_P0_hypo_dmr_2978|4|0.529|0.928	0	.
chr1	22207055	22207463	P0vsP39_P0_hypo_dmr_2987|10|0.226|0.745	0	.
chr1	22228294	22228329	P0vsP39_P0_hypo_dmr_2992|5|0.413|0.808	0	.
chr1	22258583	22258952	P0vsP39_P0_hypo_dmr_2997|6|0.127|0.488	0	.
chr1	22263688	22264074	P0vsP39_P0_hypo_dmr_3000|12|0.076|0.540	0	.
chr1	22294068	22294651	P0vsP39_P0_hypo_dmr_3012|8|0.126|0.499	0	.
chr1	22315645	22316469	P0vsP39_P0_hypo_dmr_3022|9|0.422|0.777	0	.
chr1	22321112	22321278	P0vsP39_P0_hypo_dmr_3024|12|0.177|0.778	0	.
chr1	22353906	22353989	P0vsP39_P0_hypo_dmr_3038|4|0.067|0.472	0	.
chr1	22355880	22355918	P0vsP39_P0_hypo_dmr_3039|4|0.375|0.744	0	.
chr1	22575752	22575880	P0vsP39_P0_hypo_dmr_3099|4|0.220|0.539	0	.
chr1	22598854	22599150	P0vsP39_P0_hypo_dmr_3107|7|0.112|0.646	0	.
chr1	22629007	22629410	P0vsP39_P0_hypo_dmr_3120|13|0.297|0.696	0	.
chr1	22737795	22737945	P0vsP39_P0_hypo_dmr_3160|4|0.115|0.572	0	.
chr1	22770573	22771214	P0vsP39_P0_hypo_dmr_3175|10|0.038|0.403	0	.
chr1	22880725	22880863	P0vsP39_P0_hypo_dmr_3202|3|0.122|0.441	0	.
chr1	22891827	22891893	P0vsP39_P0_hypo_dmr_3205|3|0.563|0.963	0	.
chr1	22893314	22893630	P0vsP39_P0_hypo_dmr_3206|4|0.223|0.656	0	.
chr1	22987685	22987712	P0vsP39_P0_hypo_dmr_3228|3|0.384|0.877	0	.
chr1	23003755	23003971	P0vsP39_P0_hypo_dmr_3231|3|0.153|0.602	0	.
chr1	23028045	23028173	P0vsP39_P0_hypo_dmr_3236|3|0.550|0.867	0	.
chr1	23040221	23040296	P0vsP39_P0_hypo_dmr_3239|3|0.474|0.877	0	.
chr1	23087581	23087618	P0vsP39_P0_hypo_dmr_3247|4|0.208|0.739	0	.
chr1	23093294	23093420	P0vsP39_P0_hypo_dmr_3248|7|0.154|0.821	0	.
chr1	23097796	23098014	P0vsP39_P0_hypo_dmr_3250|3|0.179|0.543	0	.
chr1	23104749	23104962	P0vsP39_P0_hypo_dmr_3252|3|0.300|0.683	0	.
chr1	23112129	23112185	P0vsP39_P0_hypo_dmr_3253|3|0.281|0.599	0	.
chr1	23139516	23139646	P0vsP39_P0_hypo_dmr_3259|3|0.424|0.815	0	.
chr1	23146366	23146610	P0vsP39_P0_hypo_dmr_3261|8|0.090|0.761	0	.
chr1	23191952	23192034	P0vsP39_P0_hypo_dmr_3272|4|0.506|0.905	0	.
chr1	23201401	23201500	P0vsP39_P0_hypo_dmr_3274|7|0.261|0.841	0	.
chr1	23202841	23202915	P0vsP39_P0_hypo_dmr_3275|3|0.048|0.410	0	.
chr1	23206964	23207346	P0vsP39_P0_hypo_dmr_3277|6|0.181|0.623	0	.
chr1	23271290	23271697	P0vsP39_P0_hypo_dmr_3288|9|0.333|0.693	0	.
chr1	23322416	23322468	P0vsP39_P0_hypo_dmr_3296|6|0.206|0.663	0	.
chr1	23351929	23352088	P0vsP39_P0_hypo_dmr_3305|7|0.162|0.748	0	.
chr1	23370757	23370909	P0vsP39_P0_hypo_dmr_3311|7|0.551|0.931	0	.
chr1	23416479	23416540	P0vsP39_P0_hypo_dmr_3322|4|0.088|0.727	0	.
chr1	23444241	23444762	P0vsP39_P0_hypo_dmr_3326|10|0.314|0.789	0	.
chr1	23487764	23488251	P0vsP39_P0_hypo_dmr_3334|3|0.443|0.834	0	.
chr1	23519967	23520522	P0vsP39_P0_hypo_dmr_3338|8|0.184|0.804	0	.
chr1	23532670	23532796	P0vsP39_P0_hypo_dmr_3341|4|0.610|0.959	0	.
chr1	23536646	23536909	P0vsP39_P0_hypo_dmr_3343|14|0.370|0.808	0	.
chr1	23538115	23538844	P0vsP39_P0_hypo_dmr_3344|14|0.402|0.808	0	.
chr1	23560057	23560552	P0vsP39_P0_hypo_dmr_3348|6|0.392|0.830	0	.
chr1	23573304	23574900	P0vsP39_P0_hypo_dmr_3352|43|0.332|0.760	0	.
chr1	23575496	23576414	P0vsP39_P0_hypo_dmr_3353|15|0.128|0.546	0	.
chr1	23649131	23649343	P0vsP39_P0_hypo_dmr_3363|5|0.272|0.838	0	.
chr1	23657989	23658018	P0vsP39_P0_hypo_dmr_3366|3|0.668|0.975	0	.
chr1	23670259	23670769	P0vsP39_P0_hypo_dmr_3367|11|0.265|0.636	0	.
chr1	23689570	23689971	P0vsP39_P0_hypo_dmr_3373|11|0.525|0.838	0	.
chr1	23704242	23704612	P0vsP39_P0_hypo_dmr_3374|3|0.239|0.623	0	.
chr1	23714667	23714905	P0vsP39_P0_hypo_dmr_3377|5|0.218|0.640	0	.
chr1	23719000	23719294	P0vsP39_P0_hypo_dmr_3378|9|0.475|0.878	0	.
chr1	23722262	23723233	P0vsP39_P0_hypo_dmr_3379|29|0.175|0.647	0	.
chr1	23724321	23724407	P0vsP39_P0_hypo_dmr_3380|3|0.624|0.979	0	.
chr1	23748075	23748105	P0vsP39_P0_hypo_dmr_3383|3|0.484|0.807	0	.
chr1	23757239	23757663	P0vsP39_P0_hypo_dmr_3385|10|0.122|0.714	0	.
chr1	23760326	23760521	P0vsP39_P0_hypo_dmr_3386|12|0.596|0.943	0	.
chr1	23763742	23766279	P0vsP39_P0_hypo_dmr_3387|41|0.056|0.591	0	.
chr1	23766884	23766990	P0vsP39_P0_hypo_dmr_3388|4|0.511|0.936	0	.
chr1	23775580	23775730	P0vsP39_P0_hypo_dmr_3390|6|0.416|0.829	0	.
chr1	23794632	23794930	P0vsP39_P0_hypo_dmr_3393|9|0.542|0.867	0	.
chr1	23850773	23850810	P0vsP39_P0_hypo_dmr_3411|4|0.156|0.519	0	.
chr1	23885077	23885291	P0vsP39_P0_hypo_dmr_3424|7|0.087|0.469	0	.
chr1	23948856	23948945	P0vsP39_P0_hypo_dmr_3450|5|0.086|0.465	0	.
chr1	23959126	23959785	P0vsP39_P0_hypo_dmr_3454|22|0.175|0.593	0	.
chr1	23962392	23962832	P0vsP39_P0_hypo_dmr_3455|4|0.287|0.724	0	.
chr1	24027395	24027657	P0vsP39_P0_hypo_dmr_3476|7|0.230|0.719	0	.
chr1	24042702	24043290	P0vsP39_P0_hypo_dmr_3480|9|0.261|0.679	0	.
chr1	24072731	24073762	P0vsP39_P0_hypo_dmr_3489|12|0.200|0.694	0	.
chr1	24086437	24086446	P0vsP39_P0_hypo_dmr_3492|4|0.091|0.595	0	.
chr1	24111849	24111901	P0vsP39_P0_hypo_dmr_3499|3|0.563|0.934	0	.
chr1	24128030	24128136	P0vsP39_P0_hypo_dmr_3505|7|0.050|0.628	0	.
chr1	24131549	24131572	P0vsP39_P0_hypo_dmr_3507|3|0.532|0.848	0	.
chr1	24139756	24141490	P0vsP39_P0_hypo_dmr_3511|38|0.279|0.690	0	.
chr1	24142215	24142573	P0vsP39_P0_hypo_dmr_3512|10|0.305|0.784	0	.
chr1	24164162	24164179	P0vsP39_P0_hypo_dmr_3517|3|0.346|0.815	0	.
chr1	24176774	24177045	P0vsP39_P0_hypo_dmr_3521|7|0.664|0.973	0	.
chr1	24186795	24187238	P0vsP39_P0_hypo_dmr_3523|11|0.355|0.730	0	.
chr1	24191418	24192160	P0vsP39_P0_hypo_dmr_3525|12|0.232|0.734	0	.
chr1	24193641	24197157	P0vsP39_P0_hypo_dmr_3526|47|0.470|0.839	0	.
chr1	24212072	24212636	P0vsP39_P0_hypo_dmr_3528|15|0.338|0.733	0	.
chr1	24230815	24232000	P0vsP39_P0_hypo_dmr_3534|10|0.400|0.704	0	.
chr1	24233312	24233931	P0vsP39_P0_hypo_dmr_3535|11|0.175|0.591	0	.
chr1	24239337	24240888	P0vsP39_P0_hypo_dmr_3539|32|0.193|0.786	0	.
chr1	24245422	24246831	P0vsP39_P0_hypo_dmr_3542|43|0.317|0.847	0	.
chr1	24253352	24253391	P0vsP39_P0_hypo_dmr_3545|3|0.504|0.914	0	.
chr1	24257923	24258351	P0vsP39_P0_hypo_dmr_3546|13|0.220|0.793	0	.
chr1	24262053	24262063	P0vsP39_P0_hypo_dmr_3547|4|0.171|0.542	0	.
chr1	24263050	24263290	P0vsP39_P0_hypo_dmr_3548|3|0.475|0.853	0	.
chr1	24267254	24267378	P0vsP39_P0_hypo_dmr_3550|6|0.095|0.822	0	.
chr1	24273646	24273805	P0vsP39_P0_hypo_dmr_3552|12|0.057|0.856	0	.
chr1	24298458	24298800	P0vsP39_P0_hypo_dmr_3559|7|0.426|0.790	0	.
chr1	24304502	24304652	P0vsP39_P0_hypo_dmr_3562|4|0.450|0.806	0	.
chr1	24305698	24305792	P0vsP39_P0_hypo_dmr_3563|4|0.603|0.905	0	.
chr1	24335225	24335521	P0vsP39_P0_hypo_dmr_3571|8|0.352|0.817	0	.
chr1	24380952	24381157	P0vsP39_P0_hypo_dmr_3579|8|0.201|0.596	0	.
chr1	24428558	24428596	P0vsP39_P0_hypo_dmr_3589|3|0.290|0.910	0	.
chr1	24472887	24472937	P0vsP39_P0_hypo_dmr_3597|3|0.362|0.926	0	.
chr1	24495604	24495743	P0vsP39_P0_hypo_dmr_3599|5|0.150|0.504	0	.
chr1	24515214	24515686	P0vsP39_P0_hypo_dmr_3605|11|0.130|0.561	0	.
chr1	24532186	24532753	P0vsP39_P0_hypo_dmr_3609|6|0.280|0.738	0	.
chr1	24539322	24539858	P0vsP39_P0_hypo_dmr_3610|6|0.304|0.619	0	.
chr1	24563123	24563499	P0vsP39_P0_hypo_dmr_3617|8|0.203|0.675	0	.
chr1	24584047	24584185	P0vsP39_P0_hypo_dmr_3620|7|0.410|0.877	0	.
chr1	24590706	24591327	P0vsP39_P0_hypo_dmr_3623|13|0.428|0.819	0	.
chr1	24686384	24686480	P0vsP39_P0_hypo_dmr_3643|3|0.100|0.484	0	.
chr1	24814975	24815400	P0vsP39_P0_hypo_dmr_3692|13|0.239|0.871	0	.
chr1	24820086	24820408	P0vsP39_P0_hypo_dmr_3693|8|0.341|0.741	0	.
chr1	24831582	24832517	P0vsP39_P0_hypo_dmr_3695|11|0.200|0.677	0	.
chr1	24845779	24845805	P0vsP39_P0_hypo_dmr_3699|3|0.270|0.665	0	.
chr1	24870761	24870960	P0vsP39_P0_hypo_dmr_3703|7|0.273|0.707	0	.
chr1	24937607	24937695	P0vsP39_P0_hypo_dmr_3715|4|0.128|0.881	0	.
chr1	24938343	24938584	P0vsP39_P0_hypo_dmr_3716|6|0.030|0.678	0	.
chr1	24951458	24951842	P0vsP39_P0_hypo_dmr_3721|7|0.263|0.681	0	.
chr1	24996646	24996703	P0vsP39_P0_hypo_dmr_3727|4|0.242|0.777	0	.
chr1	25009043	25009275	P0vsP39_P0_hypo_dmr_3731|5|0.207|0.617	0	.
chr1	25087109	25087173	P0vsP39_P0_hypo_dmr_3761|4|0.080|0.398	0	.
chr1	25087958	25088863	P0vsP39_P0_hypo_dmr_3762|9|0.065|0.414	0	.
chr1	25102669	25102691	P0vsP39_P0_hypo_dmr_3767|3|0.238|0.561	0	.
chr1	25130711	25130956	P0vsP39_P0_hypo_dmr_3779|6|0.078|0.515	0	.
chr1	25191994	25192234	P0vsP39_P0_hypo_dmr_3802|13|0.227|0.552	0	.
chr1	25242491	25242688	P0vsP39_P0_hypo_dmr_3825|9|0.193|0.703	0	.
chr1	25307935	25308362	P0vsP39_P0_hypo_dmr_3846|6|0.400|0.715	0	.
chr1	25343444	25343479	P0vsP39_P0_hypo_dmr_3853|4|0.241|0.720	0	.
chr1	25430412	25431226	P0vsP39_P0_hypo_dmr_3885|20|0.208|0.598	0	.
chr1	25474584	25474745	P0vsP39_P0_hypo_dmr_3903|4|0.078|0.476	0	.
chr1	25588042	25589062	P0vsP39_P0_hypo_dmr_3938|13|0.146|0.514	0	.
chr1	25854249	25854755	P0vsP39_P0_hypo_dmr_4027|5|0.049|0.584	0	.
chr1	25892503	25893391	P0vsP39_P0_hypo_dmr_4033|18|0.036|0.482	0	.
chr1	25974497	25974917	P0vsP39_P0_hypo_dmr_4042|4|0.239|0.551	0	.
chr1	26387962	26389261	P0vsP39_P0_hypo_dmr_4092|25|0.028|0.575	0	.
chr1	26396238	26396515	P0vsP39_P0_hypo_dmr_4094|6|0.306|0.712	0	.
chr1	26507820	26508219	P0vsP39_P0_hypo_dmr_4107|5|0.151|0.598	0	.
chr1	26682299	26682315	P0vsP39_P0_hypo_dmr_4124|3|0.680|0.986	0	.
chr1	26757615	26757728	P0vsP39_P0_hypo_dmr_4131|4|0.129|0.634	0	.
chr1	26762515	26762576	P0vsP39_P0_hypo_dmr_4132|3|0.524|0.929	0	.
chr1	26862686	26862693	P0vsP39_P0_hypo_dmr_4143|4|0.395|0.848	0	.
chr1	26863930	26864370	P0vsP39_P0_hypo_dmr_4144|9|0.137|0.562	0	.
chr1	26900534	26900558	P0vsP39_P0_hypo_dmr_4147|3|0.450|0.885	0	.
chr1	27468081	27468222	P0vsP39_P0_hypo_dmr_4185|3|0.413|0.821	0	.
chr1	27671634	27671703	P0vsP39_P0_hypo_dmr_4205|3|0.321|0.790	0	.
chr1	27745305	27745699	P0vsP39_P0_hypo_dmr_4210|5|0.284|0.664	0	.
chr1	28016130	28016433	P0vsP39_P0_hypo_dmr_4224|9|0.055|0.414	0	.
chr1	28084536	28084600	P0vsP39_P0_hypo_dmr_4230|3|0.417|0.792	0	.
chr1	28091087	28091379	P0vsP39_P0_hypo_dmr_4232|3|0.244|0.802	0	.
chr1	28323120	28323216	P0vsP39_P0_hypo_dmr_4247|3|0.408|0.870	0	.
chr1	28324319	28324368	P0vsP39_P0_hypo_dmr_4248|3|0.100|0.402	0	.
chr1	28421771	28421790	P0vsP39_P0_hypo_dmr_4260|3|0.225|0.574	0	.
chr1	28439081	28439096	P0vsP39_P0_hypo_dmr_4261|3|0.506|0.875	0	.
chr1	28487453	28487462	P0vsP39_P0_hypo_dmr_4264|4|0.489|0.933	0	.
chr1	28594028	28594113	P0vsP39_P0_hypo_dmr_4274|3|0.116|0.710	0	.
chr1	28597044	28597134	P0vsP39_P0_hypo_dmr_4275|5|0.215|0.608	0	.
chr1	28640905	28641322	P0vsP39_P0_hypo_dmr_4278|12|0.071|0.638	0	.
chr1	28677845	28677988	P0vsP39_P0_hypo_dmr_4282|4|0.070|0.517	0	.
chr1	28877660	28877830	P0vsP39_P0_hypo_dmr_4297|4|0.366|0.757	0	.
chr1	29013812	29014426	P0vsP39_P0_hypo_dmr_4310|8|0.288|0.740	0	.
chr1	29208542	29208617	P0vsP39_P0_hypo_dmr_4322|4|0.263|0.723	0	.
chr1	29217416	29217697	P0vsP39_P0_hypo_dmr_4323|7|0.094|0.683	0	.
chr1	29404279	29404633	P0vsP39_P0_hypo_dmr_4335|6|0.320|0.652	0	.
chr1	29509767	29509920	P0vsP39_P0_hypo_dmr_4340|5|0.097|0.472	0	.
chr1	30008904	30009374	P0vsP39_P0_hypo_dmr_4373|4|0.056|0.645	0	.
chr1	30060734	30060950	P0vsP39_P0_hypo_dmr_4377|4|0.040|0.482	0	.
chr1	30176066	30176480	P0vsP39_P0_hypo_dmr_4389|6|0.227|0.768	0	.
chr1	30318139	30318528	P0vsP39_P0_hypo_dmr_4399|13|0.267|0.787	0	.
chr1	30537397	30537704	P0vsP39_P0_hypo_dmr_4422|4|0.411|0.767	0	.
chr1	30548719	30548901	P0vsP39_P0_hypo_dmr_4425|12|0.087|0.853	0	.
chr1	30595639	30595658	P0vsP39_P0_hypo_dmr_4437|3|0.074|0.384	0	.
chr1	30634168	30634177	P0vsP39_P0_hypo_dmr_4443|4|0.205|0.643	0	.
chr1	30639657	30640374	P0vsP39_P0_hypo_dmr_4446|19|0.281|0.800	0	.
chr1	30678075	30678230	P0vsP39_P0_hypo_dmr_4454|7|0.236|0.743	0	.
chr1	30683327	30683360	P0vsP39_P0_hypo_dmr_4456|3|0.289|0.790	0	.
chr1	31014276	31014812	P0vsP39_P0_hypo_dmr_4526|10|0.121|0.732	0	.
chr1	31051666	31051690	P0vsP39_P0_hypo_dmr_4531|3|0.166|0.756	0	.
chr1	31064339	31064421	P0vsP39_P0_hypo_dmr_4533|4|0.286|0.766	0	.
chr1	31071162	31071370	P0vsP39_P0_hypo_dmr_4534|4|0.446|0.762	0	.
chr1	31154783	31155160	P0vsP39_P0_hypo_dmr_4549|3|0.404|0.783	0	.
chr1	31164507	31164574	P0vsP39_P0_hypo_dmr_4552|4|0.630|0.941	0	.
chr1	31205153	31206074	P0vsP39_P0_hypo_dmr_4559|11|0.091|0.392	0	.
chr1	31219580	31219810	P0vsP39_P0_hypo_dmr_4561|8|0.283|0.635	0	.
chr1	31452826	31453278	P0vsP39_P0_hypo_dmr_4579|5|0.167|0.692	0	.
chr1	31637223	31637757	P0vsP39_P0_hypo_dmr_4593|6|0.168|0.681	0	.
chr1	31640061	31640794	P0vsP39_P0_hypo_dmr_4594|10|0.182|0.657	0	.
chr1	32192344	32192500	P0vsP39_P0_hypo_dmr_4622|6|0.113|0.757	0	.
chr1	32241321	32241418	P0vsP39_P0_hypo_dmr_4628|3|0.188|0.521	0	.
chr1	32290780	32291726	P0vsP39_P0_hypo_dmr_4637|8|0.292|0.625	0	.
chr1	32309339	32309595	P0vsP39_P0_hypo_dmr_4645|7|0.254|0.705	0	.
chr1	32344585	32344672	P0vsP39_P0_hypo_dmr_4655|3|0.442|0.847	0	.
chr1	32397596	32398020	P0vsP39_P0_hypo_dmr_4659|11|0.052|0.384	0	.
chr1	32408543	32408607	P0vsP39_P0_hypo_dmr_4662|4|0.096|0.614	0	.
chr1	32568296	32568361	P0vsP39_P0_hypo_dmr_4689|3|0.527|0.882	0	.
chr1	32569194	32569235	P0vsP39_P0_hypo_dmr_4690|3|0.059|0.614	0	.
chr1	32617973	32618084	P0vsP39_P0_hypo_dmr_4700|4|0.122|0.531	0	.
chr1	32625489	32625984	P0vsP39_P0_hypo_dmr_4702|7|0.089|0.447	0	.
chr1	32711447	32711507	P0vsP39_P0_hypo_dmr_4719|4|0.385|0.792	0	.
chr1	32806010	32806456	P0vsP39_P0_hypo_dmr_4731|8|0.223|0.668	0	.
chr1	32836577	32836707	P0vsP39_P0_hypo_dmr_4736|5|0.244|0.832	0	.
chr1	32857570	32857651	P0vsP39_P0_hypo_dmr_4741|4|0.458|0.888	0	.
chr1	33024427	33025782	P0vsP39_P0_hypo_dmr_4756|29|0.145|0.766	0	.
chr1	33026761	33027557	P0vsP39_P0_hypo_dmr_4757|19|0.144|0.841	0	.
chr1	33040917	33040977	P0vsP39_P0_hypo_dmr_4758|5|0.257|0.696	0	.
chr1	33042096	33042647	P0vsP39_P0_hypo_dmr_4759|7|0.396|0.781	0	.
chr1	33098047	33098292	P0vsP39_P0_hypo_dmr_4763|8|0.042|0.725	0	.
chr1	33148465	33148727	P0vsP39_P0_hypo_dmr_4773|3|0.466|0.772	0	.
chr1	33180091	33180185	P0vsP39_P0_hypo_dmr_4777|6|0.465|0.921	0	.
chr1	33214918	33215618	P0vsP39_P0_hypo_dmr_4789|16|0.137|0.798	0	.
chr1	33268968	33270227	P0vsP39_P0_hypo_dmr_4799|16|0.376|0.709	0	.
chr1	33282424	33282758	P0vsP39_P0_hypo_dmr_4802|7|0.364|0.681	0	.
chr1	33361137	33361266	P0vsP39_P0_hypo_dmr_4814|4|0.220|0.564	0	.
chr1	33362485	33363879	P0vsP39_P0_hypo_dmr_4815|21|0.083|0.440	0	.
chr1	33459155	33459198	P0vsP39_P0_hypo_dmr_4826|4|0.637|0.964	0	.
chr1	33494404	33495930	P0vsP39_P0_hypo_dmr_4833|23|0.382|0.752	0	.
chr1	33496795	33496941	P0vsP39_P0_hypo_dmr_4834|6|0.368|0.887	0	.
chr1	33503026	33504005	P0vsP39_P0_hypo_dmr_4837|26|0.363|0.906	0	.
chr1	33528862	33528957	P0vsP39_P0_hypo_dmr_4842|8|0.365|0.887	0	.
chr1	33583955	33584164	P0vsP39_P0_hypo_dmr_4856|3|0.417|0.788	0	.
chr1	33588531	33589044	P0vsP39_P0_hypo_dmr_4860|13|0.156|0.705	0	.
chr1	33589752	33590254	P0vsP39_P0_hypo_dmr_4861|5|0.405|0.822	0	.
chr1	33591240	33591269	P0vsP39_P0_hypo_dmr_4862|4|0.462|0.817	0	.
chr1	33599112	33599380	P0vsP39_P0_hypo_dmr_4866|9|0.124|0.657	0	.
chr1	33608127	33608740	P0vsP39_P0_hypo_dmr_4870|7|0.342|0.752	0	.
chr1	33610025	33610467	P0vsP39_P0_hypo_dmr_4871|23|0.072|0.461	0	.
chr1	33615642	33615664	P0vsP39_P0_hypo_dmr_4873|3|0.625|0.947	0	.
chr1	33625797	33626152	P0vsP39_P0_hypo_dmr_4876|12|0.279|0.681	0	.
chr1	33636158	33636334	P0vsP39_P0_hypo_dmr_4881|6|0.511|0.931	0	.
chr1	33646020	33646160	P0vsP39_P0_hypo_dmr_4885|4|0.197|0.624	0	.
chr1	33693205	33693319	P0vsP39_P0_hypo_dmr_4896|3|0.421|0.768	0	.
chr1	33696727	33696810	P0vsP39_P0_hypo_dmr_4899|10|0.149|0.683	0	.
chr1	33754978	33755302	P0vsP39_P0_hypo_dmr_4922|17|0.090|0.459	0	.
chr1	33756574	33756627	P0vsP39_P0_hypo_dmr_4923|5|0.075|0.386	0	.
chr1	33844026	33844204	P0vsP39_P0_hypo_dmr_4949|11|0.067|0.438	0	.
chr1	33873230	33874175	P0vsP39_P0_hypo_dmr_4958|12|0.203|0.608	0	.
chr1	33875712	33875795	P0vsP39_P0_hypo_dmr_4960|5|0.506|0.870	0	.
chr1	33876690	33876748	P0vsP39_P0_hypo_dmr_4961|3|0.244|0.705	0	.
chr1	33896006	33896609	P0vsP39_P0_hypo_dmr_4967|8|0.215|0.603	0	.
chr1	33903609	33903779	P0vsP39_P0_hypo_dmr_4972|4|0.339|0.705	0	.
chr1	33917598	33917628	P0vsP39_P0_hypo_dmr_4980|4|0.433|0.901	0	.
chr1	33975569	33975873	P0vsP39_P0_hypo_dmr_5000|12|0.189|0.799	0	.
chr1	34003638	34003671	P0vsP39_P0_hypo_dmr_5012|3|0.337|0.870	0	.
chr1	34008795	34008989	P0vsP39_P0_hypo_dmr_5014|5|0.188|0.659	0	.
chr1	34024318	34024510	P0vsP39_P0_hypo_dmr_5022|5|0.134|0.446	0	.
chr1	34041851	34041879	P0vsP39_P0_hypo_dmr_5030|4|0.150|0.522	0	.
chr1	34048492	34048543	P0vsP39_P0_hypo_dmr_5035|4|0.400|0.772	0	.
chr1	34053291	34053358	P0vsP39_P0_hypo_dmr_5037|6|0.211|0.525	0	.
chr1	34057023	34057162	P0vsP39_P0_hypo_dmr_5039|4|0.306|0.652	0	.
chr1	34073845	34075324	P0vsP39_P0_hypo_dmr_5045|28|0.222|0.650	0	.
chr1	34095363	34095415	P0vsP39_P0_hypo_dmr_5052|3|0.227|0.794	0	.
chr1	34099940	34100736	P0vsP39_P0_hypo_dmr_5054|11|0.116|0.533	0	.
chr1	34103219	34103958	P0vsP39_P0_hypo_dmr_5055|10|0.210|0.544	0	.
chr1	34106258	34107121	P0vsP39_P0_hypo_dmr_5058|26|0.236|0.674	0	.
chr1	34130847	34131252	P0vsP39_P0_hypo_dmr_5068|20|0.128|0.745	0	.
chr1	34140587	34140975	P0vsP39_P0_hypo_dmr_5073|9|0.187|0.620	0	.
chr1	34144733	34144938	P0vsP39_P0_hypo_dmr_5075|8|0.318|0.686	0	.
chr1	34150635	34151176	P0vsP39_P0_hypo_dmr_5077|19|0.094|0.734	0	.
chr1	34156350	34156429	P0vsP39_P0_hypo_dmr_5080|3|0.284|0.730	0	.
chr1	34158817	34159664	P0vsP39_P0_hypo_dmr_5081|18|0.152|0.501	0	.
chr1	34164105	34164173	P0vsP39_P0_hypo_dmr_5083|4|0.537|0.840	0	.
chr1	34166090	34166241	P0vsP39_P0_hypo_dmr_5084|6|0.081|0.442	0	.
chr1	34216379	34216742	P0vsP39_P0_hypo_dmr_5107|5|0.282|0.637	0	.
chr1	34237805	34238513	P0vsP39_P0_hypo_dmr_5120|28|0.329|0.768	0	.
chr1	34297048	34297071	P0vsP39_P0_hypo_dmr_5149|4|0.093|0.529	0	.
chr1	34298618	34300056	P0vsP39_P0_hypo_dmr_5151|50|0.064|0.496	0	.
chr1	34304261	34304492	P0vsP39_P0_hypo_dmr_5154|6|0.065|0.526	0	.
chr1	34330195	34330347	P0vsP39_P0_hypo_dmr_5163|3|0.517|0.830	0	.
chr1	34375846	34376400	P0vsP39_P0_hypo_dmr_5171|7|0.318|0.642	0	.
chr1	34388058	34388266	P0vsP39_P0_hypo_dmr_5173|5|0.540|0.846	0	.
chr1	34397253	34397312	P0vsP39_P0_hypo_dmr_5175|3|0.135|0.617	0	.
chr1	34398870	34399876	P0vsP39_P0_hypo_dmr_5176|21|0.281|0.690	0	.
chr1	34402061	34402692	P0vsP39_P0_hypo_dmr_5178|10|0.308|0.649	0	.
chr1	34415625	34415792	P0vsP39_P0_hypo_dmr_5181|4|0.598|0.900	0	.
chr1	34460487	34460628	P0vsP39_P0_hypo_dmr_5192|4|0.399|0.722	0	.
chr1	34479986	34480037	P0vsP39_P0_hypo_dmr_5197|3|0.617|0.961	0	.
chr1	34485191	34485327	P0vsP39_P0_hypo_dmr_5199|8|0.279|0.804	0	.
chr1	34503197	34503277	P0vsP39_P0_hypo_dmr_5203|3|0.245|0.860	0	.
chr1	34505373	34505529	P0vsP39_P0_hypo_dmr_5204|6|0.485|0.900	0	.
chr1	34527451	34527525	P0vsP39_P0_hypo_dmr_5205|3|0.560|0.959	0	.
chr1	34636873	34637234	P0vsP39_P0_hypo_dmr_5228|6|0.370|0.853	0	.
chr1	34640199	34640479	P0vsP39_P0_hypo_dmr_5229|7|0.239|0.782	0	.
chr1	34664205	34667272	P0vsP39_P0_hypo_dmr_5232|85|0.243|0.768	0	.
chr1	34696809	34696948	P0vsP39_P0_hypo_dmr_5236|5|0.295|0.701	0	.
chr1	34710805	34710935	P0vsP39_P0_hypo_dmr_5241|7|0.223|0.673	0	.
chr1	34714168	34714503	P0vsP39_P0_hypo_dmr_5242|8|0.480|0.847	0	.
chr1	34716547	34716723	P0vsP39_P0_hypo_dmr_5243|6|0.518|0.841	0	.
chr1	34746092	34746195	P0vsP39_P0_hypo_dmr_5250|5|0.300|0.725	0	.
chr1	34962134	34962785	P0vsP39_P0_hypo_dmr_5304|13|0.432|0.740	0	.
chr1	34967470	34967951	P0vsP39_P0_hypo_dmr_5305|8|0.196|0.596	0	.
chr1	34983196	34983249	P0vsP39_P0_hypo_dmr_5308|4|0.033|0.585	0	.
chr1	34987883	34988054	P0vsP39_P0_hypo_dmr_5309|10|0.062|0.383	0	.
chr1	35095300	35096104	P0vsP39_P0_hypo_dmr_5322|8|0.356|0.760	0	.
chr1	35137994	35138042	P0vsP39_P0_hypo_dmr_5326|4|0.227|0.724	0	.
chr1	35212069	35212719	P0vsP39_P0_hypo_dmr_5335|13|0.520|0.863	0	.
chr1	35232498	35233002	P0vsP39_P0_hypo_dmr_5337|8|0.167|0.706	0	.
chr1	35265610	35266173	P0vsP39_P0_hypo_dmr_5342|10|0.412|0.873	0	.
chr1	35282461	35282536	P0vsP39_P0_hypo_dmr_5348|3|0.313|0.792	0	.
chr1	35359047	35359211	P0vsP39_P0_hypo_dmr_5360|8|0.102|0.614	0	.
chr1	35400835	35402183	P0vsP39_P0_hypo_dmr_5370|38|0.382|0.877	0	.
chr1	35405564	35405707	P0vsP39_P0_hypo_dmr_5372|4|0.445|0.860	0	.
chr1	35416084	35416939	P0vsP39_P0_hypo_dmr_5374|18|0.146|0.635	0	.
chr1	35423581	35423657	P0vsP39_P0_hypo_dmr_5377|3|0.529|0.846	0	.
chr1	35443003	35443196	P0vsP39_P0_hypo_dmr_5386|6|0.329|0.803	0	.
chr1	35457917	35458074	P0vsP39_P0_hypo_dmr_5388|6|0.519|0.861	0	.
chr1	35464448	35464498	P0vsP39_P0_hypo_dmr_5389|8|0.258|0.858	0	.
chr1	35470850	35470916	P0vsP39_P0_hypo_dmr_5391|4|0.248|0.862	0	.
chr1	35522850	35523231	P0vsP39_P0_hypo_dmr_5401|6|0.447|0.876	0	.
chr1	35573528	35573588	P0vsP39_P0_hypo_dmr_5417|3|0.347|0.870	0	.
chr1	35582460	35582540	P0vsP39_P0_hypo_dmr_5419|3|0.460|0.861	0	.
chr1	35586287	35586623	P0vsP39_P0_hypo_dmr_5421|6|0.426|0.815	0	.
chr1	35588737	35589302	P0vsP39_P0_hypo_dmr_5422|12|0.278|0.788	0	.
chr1	35642596	35642899	P0vsP39_P0_hypo_dmr_5433|7|0.619|0.921	0	.
chr1	35653062	35654068	P0vsP39_P0_hypo_dmr_5434|15|0.138|0.482	0	.
chr1	35682218	35683046	P0vsP39_P0_hypo_dmr_5442|17|0.367|0.718	0	.
chr1	35683816	35683953	P0vsP39_P0_hypo_dmr_5443|7|0.308|0.727	0	.
chr1	35694408	35695624	P0vsP39_P0_hypo_dmr_5445|27|0.067|0.493	0	.
chr1	35697459	35698673	P0vsP39_P0_hypo_dmr_5446|27|0.107|0.588	0	.
chr1	35701571	35702040	P0vsP39_P0_hypo_dmr_5448|9|0.365|0.732	0	.
chr1	35711777	35711872	P0vsP39_P0_hypo_dmr_5450|3|0.321|0.738	0	.
chr1	35714063	35714194	P0vsP39_P0_hypo_dmr_5451|4|0.537|0.897	0	.
chr1	35720221	35720341	P0vsP39_P0_hypo_dmr_5452|4|0.627|0.962	0	.
chr1	35723737	35723809	P0vsP39_P0_hypo_dmr_5453|8|0.234|0.854	0	.
chr1	35730547	35730780	P0vsP39_P0_hypo_dmr_5454|7|0.291|0.706	0	.
chr1	35749587	35751093	P0vsP39_P0_hypo_dmr_5461|26|0.193|0.752	0	.
chr1	35786442	35786970	P0vsP39_P0_hypo_dmr_5472|15|0.330|0.827	0	.
chr1	35804018	35804282	P0vsP39_P0_hypo_dmr_5477|10|0.440|0.826	0	.
chr1	35806388	35806867	P0vsP39_P0_hypo_dmr_5478|6|0.167|0.735	0	.
chr1	35811436	35811962	P0vsP39_P0_hypo_dmr_5481|12|0.242|0.792	0	.
chr1	35865561	35865707	P0vsP39_P0_hypo_dmr_5497|8|0.198|0.800	0	.
chr1	35874826	35876166	P0vsP39_P0_hypo_dmr_5498|32|0.288|0.751	0	.
chr1	35878658	35878668	P0vsP39_P0_hypo_dmr_5500|3|0.058|0.537	0	.
chr1	35885173	35885407	P0vsP39_P0_hypo_dmr_5504|12|0.250|0.834	0	.
chr1	35911882	35911925	P0vsP39_P0_hypo_dmr_5510|4|0.235|0.745	0	.
chr1	35920113	35920660	P0vsP39_P0_hypo_dmr_5513|15|0.241|0.581	0	.
chr1	35936334	35936752	P0vsP39_P0_hypo_dmr_5521|10|0.080|0.550	0	.
chr1	35941089	35942554	P0vsP39_P0_hypo_dmr_5522|44|0.279|0.828	0	.
chr1	35944000	35944980	P0vsP39_P0_hypo_dmr_5523|19|0.357|0.856	0	.
chr1	35957633	35958407	P0vsP39_P0_hypo_dmr_5526|12|0.176|0.710	0	.
chr1	35959196	35959388	P0vsP39_P0_hypo_dmr_5527|8|0.515|0.895	0	.
chr1	35974599	35974691	P0vsP39_P0_hypo_dmr_5534|4|0.270|0.819	0	.
chr1	35982321	35982969	P0vsP39_P0_hypo_dmr_5536|20|0.258|0.745	0	.
chr1	36003238	36004547	P0vsP39_P0_hypo_dmr_5545|29|0.395|0.900	0	.
chr1	36013442	36014225	P0vsP39_P0_hypo_dmr_5546|22|0.392|0.820	0	.
chr1	36016901	36017856	P0vsP39_P0_hypo_dmr_5547|16|0.228|0.581	0	.
chr1	36059856	36061283	P0vsP39_P0_hypo_dmr_5554|28|0.234|0.802	0	.
chr1	36077213	36077400	P0vsP39_P0_hypo_dmr_5562|9|0.217|0.643	0	.
chr1	36089284	36089380	P0vsP39_P0_hypo_dmr_5569|8|0.197|0.714	0	.
chr1	36090190	36090504	P0vsP39_P0_hypo_dmr_5570|3|0.107|0.490	0	.
chr1	36131118	36132100	P0vsP39_P0_hypo_dmr_5582|15|0.469|0.804	0	.
chr1	36240260	36240477	P0vsP39_P0_hypo_dmr_5619|8|0.074|0.404	0	.
chr1	36250300	36251727	P0vsP39_P0_hypo_dmr_5622|21|0.308|0.672	0	.
chr1	36254888	36255922	P0vsP39_P0_hypo_dmr_5624|26|0.098|0.467	0	.
chr1	36264168	36264431	P0vsP39_P0_hypo_dmr_5626|7|0.371|0.715	0	.
chr1	36270447	36270671	P0vsP39_P0_hypo_dmr_5627|3|0.564|0.878	0	.
chr1	36288781	36288829	P0vsP39_P0_hypo_dmr_5630|5|0.207|0.660	0	.
chr1	36308543	36309909	P0vsP39_P0_hypo_dmr_5638|20|0.302|0.624	0	.
chr1	36462704	36462745	P0vsP39_P0_hypo_dmr_5677|6|0.123|0.759	0	.
chr1	36478917	36479056	P0vsP39_P0_hypo_dmr_5681|6|0.580|0.924	0	.
chr1	36480695	36480840	P0vsP39_P0_hypo_dmr_5682|10|0.444|0.949	0	.
chr1	36483848	36483915	P0vsP39_P0_hypo_dmr_5683|4|0.563|0.966	0	.
chr1	36489844	36490007	P0vsP39_P0_hypo_dmr_5685|6|0.303|0.771	0	.
chr1	36492467	36492695	P0vsP39_P0_hypo_dmr_5687|6|0.141|0.730	0	.
chr1	36512219	36512683	P0vsP39_P0_hypo_dmr_5693|118|0.006|0.433	0	.
chr1	36517610	36517708	P0vsP39_P0_hypo_dmr_5695|5|0.264|0.796	0	.
chr1	36523338	36523904	P0vsP39_P0_hypo_dmr_5697|18|0.049|0.550	0	.
chr1	36528779	36528850	P0vsP39_P0_hypo_dmr_5699|4|0.013|0.651	0	.
chr1	36537550	36537915	P0vsP39_P0_hypo_dmr_5701|10|0.287|0.638	0	.
chr1	36555761	36555792	P0vsP39_P0_hypo_dmr_5709|3|0.105|0.518	0	.
chr1	36558940	36559575	P0vsP39_P0_hypo_dmr_5710|22|0.063|0.572	0	.
chr1	36561123	36561684	P0vsP39_P0_hypo_dmr_5711|6|0.536|0.891	0	.
chr1	36565869	36565998	P0vsP39_P0_hypo_dmr_5713|5|0.481|0.977	0	.
chr1	36567933	36568748	P0vsP39_P0_hypo_dmr_5715|21|0.406|0.736	0	.
chr1	36569440	36570071	P0vsP39_P0_hypo_dmr_5716|7|0.479|0.860	0	.
chr1	36577797	36577884	P0vsP39_P0_hypo_dmr_5718|4|0.537|0.970	0	.
chr1	36579973	36580218	P0vsP39_P0_hypo_dmr_5719|6|0.111|0.506	0	.
chr1	36580893	36582392	P0vsP39_P0_hypo_dmr_5720|18|0.417|0.811	0	.
chr1	36586314	36586495	P0vsP39_P0_hypo_dmr_5722|7|0.421|0.952	0	.
chr1	36589593	36589746	P0vsP39_P0_hypo_dmr_5723|9|0.299|0.880	0	.
chr1	36592579	36593852	P0vsP39_P0_hypo_dmr_5726|15|0.365|0.774	0	.
chr1	36595781	36596463	P0vsP39_P0_hypo_dmr_5728|14|0.202|0.706	0	.
chr1	36602135	36602429	P0vsP39_P0_hypo_dmr_5730|5|0.362|0.672	0	.
chr1	36618031	36618537	P0vsP39_P0_hypo_dmr_5735|7|0.642|0.947	0	.
chr1	36636475	36636641	P0vsP39_P0_hypo_dmr_5742|7|0.016|0.551	0	.
chr1	36639016	36639200	P0vsP39_P0_hypo_dmr_5743|4|0.468|0.966	0	.
chr1	36640271	36640359	P0vsP39_P0_hypo_dmr_5744|4|0.167|0.716	0	.
chr1	36646138	36646523	P0vsP39_P0_hypo_dmr_5745|8|0.218|0.550	0	.
chr1	36655178	36655356	P0vsP39_P0_hypo_dmr_5746|5|0.355|0.864	0	.
chr1	36680996	36681198	P0vsP39_P0_hypo_dmr_5751|11|0.207|0.751	0	.
chr1	36683406	36683544	P0vsP39_P0_hypo_dmr_5752|7|0.447|0.775	0	.
chr1	36721609	36721711	P0vsP39_P0_hypo_dmr_5763|14|0.243|0.737	0	.
chr1	36724151	36724292	P0vsP39_P0_hypo_dmr_5764|4|0.282|0.766	0	.
chr1	36789427	36789725	P0vsP39_P0_hypo_dmr_5773|4|0.532|0.846	0	.
chr1	36836299	36836399	P0vsP39_P0_hypo_dmr_5793|8|0.146|0.640	0	.
chr1	36886650	36886898	P0vsP39_P0_hypo_dmr_5815|6|0.358|0.702	0	.
chr1	36893303	36893440	P0vsP39_P0_hypo_dmr_5820|10|0.068|0.768	0	.
chr1	36914511	36914733	P0vsP39_P0_hypo_dmr_5830|6|0.248|0.636	0	.
chr1	36916785	36916809	P0vsP39_P0_hypo_dmr_5831|3|0.419|0.793	0	.
chr1	36949757	36950145	P0vsP39_P0_hypo_dmr_5847|9|0.086|0.541	0	.
chr1	36962919	36963049	P0vsP39_P0_hypo_dmr_5851|8|0.347|0.873	0	.
chr1	36980396	36980441	P0vsP39_P0_hypo_dmr_5855|4|0.325|0.779	0	.
chr1	36984730	36987024	P0vsP39_P0_hypo_dmr_5857|43|0.303|0.714	0	.
chr1	36996748	36996898	P0vsP39_P0_hypo_dmr_5861|3|0.339|0.680	0	.
chr1	37001904	37002180	P0vsP39_P0_hypo_dmr_5862|12|0.192|0.793	0	.
chr1	37011742	37011898	P0vsP39_P0_hypo_dmr_5866|3|0.524|0.872	0	.
chr1	37092984	37092988	P0vsP39_P0_hypo_dmr_5886|3|0.333|0.743	0	.
chr1	37093670	37093854	P0vsP39_P0_hypo_dmr_5887|5|0.254|0.725	0	.
chr1	37104863	37105631	P0vsP39_P0_hypo_dmr_5891|23|0.136|0.695	0	.
chr1	37121040	37121166	P0vsP39_P0_hypo_dmr_5896|8|0.264|0.855	0	.
chr1	37138750	37139167	P0vsP39_P0_hypo_dmr_5902|9|0.325|0.682	0	.
chr1	37154320	37154757	P0vsP39_P0_hypo_dmr_5910|9|0.352|0.789	0	.
chr1	37155516	37156078	P0vsP39_P0_hypo_dmr_5911|8|0.497|0.816	0	.
chr1	37165615	37166661	P0vsP39_P0_hypo_dmr_5916|24|0.260|0.659	0	.
chr1	37170198	37170246	P0vsP39_P0_hypo_dmr_5918|4|0.199|0.803	0	.
chr1	37185626	37185878	P0vsP39_P0_hypo_dmr_5925|10|0.142|0.850	0	.
chr1	37187182	37188548	P0vsP39_P0_hypo_dmr_5926|26|0.484|0.878	0	.
chr1	37196140	37196283	P0vsP39_P0_hypo_dmr_5927|5|0.497|0.798	0	.
chr1	37218413	37218938	P0vsP39_P0_hypo_dmr_5932|29|0.063|0.431	0	.
chr1	37236876	37236944	P0vsP39_P0_hypo_dmr_5939|6|0.565|0.923	0	.
chr1	37239375	37239487	P0vsP39_P0_hypo_dmr_5940|4|0.351|0.725	0	.
chr1	37241029	37241280	P0vsP39_P0_hypo_dmr_5941|6|0.378|0.776	0	.
chr1	37244486	37244595	P0vsP39_P0_hypo_dmr_5943|8|0.431|0.946	0	.
chr1	37268130	37268382	P0vsP39_P0_hypo_dmr_5951|5|0.525|0.853	0	.
chr1	37361770	37362016	P0vsP39_P0_hypo_dmr_5977|9|0.186|0.743	0	.
chr1	37381934	37382365	P0vsP39_P0_hypo_dmr_5985|9|0.096|0.488	0	.
chr1	37464446	37464615	P0vsP39_P0_hypo_dmr_6012|4|0.506|0.823	0	.
chr1	37500894	37500997	P0vsP39_P0_hypo_dmr_6027|7|0.119|0.648	0	.
chr1	37511787	37513318	P0vsP39_P0_hypo_dmr_6032|25|0.260|0.663	0	.
chr1	37533344	37533374	P0vsP39_P0_hypo_dmr_6042|5|0.398|0.787	0	.
chr1	37534338	37534877	P0vsP39_P0_hypo_dmr_6043|16|0.205|0.618	0	.
chr1	37544366	37544421	P0vsP39_P0_hypo_dmr_6049|8|0.350|0.820	0	.
chr1	37546672	37546734	P0vsP39_P0_hypo_dmr_6050|3|0.525|0.890	0	.
chr1	37565592	37565698	P0vsP39_P0_hypo_dmr_6054|5|0.376|0.717	0	.
chr1	37665855	37666300	P0vsP39_P0_hypo_dmr_6091|13|0.176|0.709	0	.
chr1	37694683	37695010	P0vsP39_P0_hypo_dmr_6103|3|0.317|0.648	0	.
chr1	37736801	37736840	P0vsP39_P0_hypo_dmr_6117|3|0.590|0.914	0	.
chr1	37916376	37916968	P0vsP39_P0_hypo_dmr_6161|12|0.272|0.783	0	.
chr1	37917850	37917991	P0vsP39_P0_hypo_dmr_6163|6|0.348|0.734	0	.
chr1	37956334	37957007	P0vsP39_P0_hypo_dmr_6175|5|0.217|0.633	0	.
chr1	37971664	37971784	P0vsP39_P0_hypo_dmr_6179|6|0.243|0.665	0	.
chr1	38142414	38142775	P0vsP39_P0_hypo_dmr_6240|5|0.551|0.914	0	.
chr1	38156574	38156693	P0vsP39_P0_hypo_dmr_6244|4|0.572|0.929	0	.
chr1	38160976	38161284	P0vsP39_P0_hypo_dmr_6245|14|0.565|0.910	0	.
chr1	38191982	38192228	P0vsP39_P0_hypo_dmr_6253|3|0.427|0.776	0	.
chr1	38193160	38193741	P0vsP39_P0_hypo_dmr_6254|20|0.204|0.825	0	.
chr1	38197787	38200607	P0vsP39_P0_hypo_dmr_6256|90|0.132|0.576	0	.
chr1	38210227	38210991	P0vsP39_P0_hypo_dmr_6260|48|0.211|0.831	0	.
chr1	38230295	38230365	P0vsP39_P0_hypo_dmr_6267|3|0.376|0.839	0	.
chr1	38252392	38252855	P0vsP39_P0_hypo_dmr_6275|14|0.358|0.736	0	.
chr1	38254826	38254850	P0vsP39_P0_hypo_dmr_6277|3|0.503|0.963	0	.
chr1	38262086	38263638	P0vsP39_P0_hypo_dmr_6281|22|0.340|0.685	0	.
chr1	38279962	38280049	P0vsP39_P0_hypo_dmr_6286|5|0.183|0.621	0	.
chr1	38298355	38298448	P0vsP39_P0_hypo_dmr_6292|6|0.040|0.716	0	.
chr1	38306865	38307017	P0vsP39_P0_hypo_dmr_6294|5|0.250|0.631	0	.
chr1	38307923	38308857	P0vsP39_P0_hypo_dmr_6295|14|0.175|0.570	0	.
chr1	38312284	38312342	P0vsP39_P0_hypo_dmr_6296|3|0.586|0.946	0	.
chr1	38316437	38316720	P0vsP39_P0_hypo_dmr_6297|18|0.389|0.922	0	.
chr1	38319949	38320860	P0vsP39_P0_hypo_dmr_6300|37|0.105|0.649	0	.
chr1	38329331	38329741	P0vsP39_P0_hypo_dmr_6303|11|0.307|0.848	0	.
chr1	38336130	38336979	P0vsP39_P0_hypo_dmr_6306|20|0.206|0.602	0	.
chr1	38348448	38348579	P0vsP39_P0_hypo_dmr_6309|5|0.432|0.867	0	.
chr1	38363115	38364666	P0vsP39_P0_hypo_dmr_6316|13|0.278|0.688	0	.
chr1	38366041	38366114	P0vsP39_P0_hypo_dmr_6317|3|0.438|0.863	0	.
chr1	38367471	38368521	P0vsP39_P0_hypo_dmr_6318|36|0.153|0.757	0	.
chr1	38389722	38391070	P0vsP39_P0_hypo_dmr_6326|47|0.212|0.716	0	.
chr1	38394924	38396140	P0vsP39_P0_hypo_dmr_6328|27|0.227|0.799	0	.
chr1	38396714	38397023	P0vsP39_P0_hypo_dmr_6329|8|0.440|0.835	0	.
chr1	38401933	38402095	P0vsP39_P0_hypo_dmr_6333|7|0.269|0.854	0	.
chr1	38407628	38407749	P0vsP39_P0_hypo_dmr_6336|5|0.348|0.679	0	.
chr1	38417128	38418239	P0vsP39_P0_hypo_dmr_6340|29|0.133|0.500	0	.
chr1	38418798	38419005	P0vsP39_P0_hypo_dmr_6341|6|0.127|0.452	0	.
chr1	38423037	38423108	P0vsP39_P0_hypo_dmr_6343|5|0.552|0.867	0	.
chr1	38423838	38424014	P0vsP39_P0_hypo_dmr_6344|8|0.167|0.674	0	.
chr1	38436054	38437108	P0vsP39_P0_hypo_dmr_6348|25|0.230|0.827	0	.
chr1	38439461	38439936	P0vsP39_P0_hypo_dmr_6349|19|0.016|0.343	0	.
chr1	38441130	38441838	P0vsP39_P0_hypo_dmr_6351|19|0.109|0.590	0	.
chr1	38443747	38444201	P0vsP39_P0_hypo_dmr_6352|9|0.349|0.762	0	.
chr1	38460053	38460454	P0vsP39_P0_hypo_dmr_6357|8|0.416|0.903	0	.
chr1	38467522	38468005	P0vsP39_P0_hypo_dmr_6359|6|0.389|0.738	0	.
chr1	38482405	38482423	P0vsP39_P0_hypo_dmr_6366|4|0.067|0.542	0	.
chr1	38485043	38485341	P0vsP39_P0_hypo_dmr_6368|5|0.341|0.723	0	.
chr1	38488795	38489230	P0vsP39_P0_hypo_dmr_6369|22|0.159|0.751	0	.
chr1	38492082	38492111	P0vsP39_P0_hypo_dmr_6371|4|0.324|0.838	0	.
chr1	38496406	38497128	P0vsP39_P0_hypo_dmr_6372|26|0.226|0.660	0	.
chr1	38502036	38502227	P0vsP39_P0_hypo_dmr_6374|15|0.193|0.687	0	.
chr1	38502765	38503740	P0vsP39_P0_hypo_dmr_6375|39|0.060|0.600	0	.
chr1	38530245	38530724	P0vsP39_P0_hypo_dmr_6387|9|0.208|0.593	0	.
chr1	38544637	38544702	P0vsP39_P0_hypo_dmr_6395|5|0.140|0.711	0	.
chr1	38546835	38546969	P0vsP39_P0_hypo_dmr_6397|9|0.338|0.771	0	.
chr1	38552618	38553285	P0vsP39_P0_hypo_dmr_6401|14|0.460|0.803	0	.
chr1	38565240	38566295	P0vsP39_P0_hypo_dmr_6409|25|0.223|0.529	0	.
chr1	38566910	38569267	P0vsP39_P0_hypo_dmr_6410|24|0.220|0.617	0	.
chr1	38593914	38594304	P0vsP39_P0_hypo_dmr_6423|9|0.152|0.604	0	.
chr1	38606348	38607231	P0vsP39_P0_hypo_dmr_6427|27|0.275|0.843	0	.
chr1	38618604	38618648	P0vsP39_P0_hypo_dmr_6430|3|0.408|0.895	0	.
chr1	38620043	38620075	P0vsP39_P0_hypo_dmr_6431|3|0.262|0.657	0	.
chr1	38627180	38627640	P0vsP39_P0_hypo_dmr_6434|71|0.006|0.323	0	.
chr1	38628661	38629854	P0vsP39_P0_hypo_dmr_6435|23|0.161|0.468	0	.
chr1	38633092	38635022	P0vsP39_P0_hypo_dmr_6436|38|0.516|0.891	0	.
chr1	38642363	38642682	P0vsP39_P0_hypo_dmr_6439|8|0.147|0.845	0	.
chr1	38647892	38648740	P0vsP39_P0_hypo_dmr_6440|25|0.458|0.858	0	.
chr1	38666538	38666977	P0vsP39_P0_hypo_dmr_6448|16|0.244|0.784	0	.
chr1	38670605	38671235	P0vsP39_P0_hypo_dmr_6449|15|0.346|0.761	0	.
chr1	38696120	38696912	P0vsP39_P0_hypo_dmr_6457|28|0.201|0.717	0	.
chr1	38728485	38729530	P0vsP39_P0_hypo_dmr_6464|16|0.403|0.753	0	.
chr1	38732982	38733047	P0vsP39_P0_hypo_dmr_6467|7|0.399|0.897	0	.
chr1	38747241	38747302	P0vsP39_P0_hypo_dmr_6471|5|0.424|0.942	0	.
chr1	38757540	38757994	P0vsP39_P0_hypo_dmr_6475|10|0.043|0.383	0	.
chr1	38760492	38760948	P0vsP39_P0_hypo_dmr_6476|8|0.570|0.877	0	.
chr1	38766337	38767717	P0vsP39_P0_hypo_dmr_6479|24|0.352|0.716	0	.
chr1	38770219	38770368	P0vsP39_P0_hypo_dmr_6480|11|0.291|0.824	0	.
chr1	38786446	38786664	P0vsP39_P0_hypo_dmr_6486|6|0.132|0.533	0	.
chr1	38822269	38822353	P0vsP39_P0_hypo_dmr_6503|3|0.133|0.492	0	.
chr1	38843181	38843531	P0vsP39_P0_hypo_dmr_6513|8|0.086|0.647	0	.
chr1	38892987	38893908	P0vsP39_P0_hypo_dmr_6524|21|0.250|0.692	0	.
chr1	38978095	38978874	P0vsP39_P0_hypo_dmr_6540|17|0.488|0.830	0	.
chr1	39005316	39006225	P0vsP39_P0_hypo_dmr_6548|16|0.452|0.884	0	.
chr1	39007334	39008019	P0vsP39_P0_hypo_dmr_6549|15|0.553|0.877	0	.
chr1	39024542	39024689	P0vsP39_P0_hypo_dmr_6554|12|0.284|0.928	0	.
chr1	39040865	39040980	P0vsP39_P0_hypo_dmr_6560|4|0.329|0.629	0	.
chr1	39045951	39047001	P0vsP39_P0_hypo_dmr_6564|29|0.114|0.707	0	.
chr1	39068123	39068193	P0vsP39_P0_hypo_dmr_6574|3|0.173|0.627	0	.
chr1	39069995	39070164	P0vsP39_P0_hypo_dmr_6576|7|0.133|0.588	0	.
chr1	39107816	39107846	P0vsP39_P0_hypo_dmr_6588|3|0.488|0.864	0	.
chr1	39122872	39122988	P0vsP39_P0_hypo_dmr_6595|8|0.298|0.787	0	.
chr1	39124157	39124306	P0vsP39_P0_hypo_dmr_6596|3|0.428|0.826	0	.
chr1	39226644	39227004	P0vsP39_P0_hypo_dmr_6630|8|0.372|0.761	0	.
chr1	39237755	39237839	P0vsP39_P0_hypo_dmr_6635|4|0.132|0.766	0	.
chr1	39252063	39252396	P0vsP39_P0_hypo_dmr_6640|9|0.119|0.625	0	.
chr1	39267022	39267270	P0vsP39_P0_hypo_dmr_6645|12|0.111|0.602	0	.
chr1	39312381	39313515	P0vsP39_P0_hypo_dmr_6666|48|0.057|0.436	0	.
chr1	39320339	39320385	P0vsP39_P0_hypo_dmr_6670|3|0.399|0.792	0	.
chr1	39335528	39336064	P0vsP39_P0_hypo_dmr_6675|27|0.215|0.775	0	.
chr1	39361821	39362600	P0vsP39_P0_hypo_dmr_6682|28|0.319|0.674	0	.
chr1	39390386	39390503	P0vsP39_P0_hypo_dmr_6691|5|0.320|0.744	0	.
chr1	39390889	39391377	P0vsP39_P0_hypo_dmr_6692|29|0.276|0.753	0	.
chr1	39417947	39418403	P0vsP39_P0_hypo_dmr_6699|19|0.245|0.742	0	.
chr1	39443221	39444325	P0vsP39_P0_hypo_dmr_6706|25|0.416|0.781	0	.
chr1	39482459	39483002	P0vsP39_P0_hypo_dmr_6720|14|0.294|0.727	0	.
chr1	39506061	39506249	P0vsP39_P0_hypo_dmr_6726|5|0.650|0.950	0	.
chr1	39507009	39507148	P0vsP39_P0_hypo_dmr_6727|10|0.135|0.915	0	.
chr1	39512053	39512319	P0vsP39_P0_hypo_dmr_6729|7|0.502|0.857	0	.
chr1	39516699	39516842	P0vsP39_P0_hypo_dmr_6730|3|0.526|0.889	0	.
chr1	39521368	39521420	P0vsP39_P0_hypo_dmr_6732|4|0.584|0.931	0	.
chr1	39528230	39528713	P0vsP39_P0_hypo_dmr_6734|10|0.139|0.530	0	.
chr1	39532670	39532724	P0vsP39_P0_hypo_dmr_6737|3|0.489|0.901	0	.
chr1	39534123	39534324	P0vsP39_P0_hypo_dmr_6738|5|0.067|0.604	0	.
chr1	39563914	39563967	P0vsP39_P0_hypo_dmr_6747|5|0.159|0.482	0	.
chr1	39567107	39567368	P0vsP39_P0_hypo_dmr_6749|7|0.232|0.685	0	.
chr1	39596703	39596716	P0vsP39_P0_hypo_dmr_6756|3|0.364|0.772	0	.
chr1	39598747	39599107	P0vsP39_P0_hypo_dmr_6757|14|0.057|0.426	0	.
chr1	39618552	39619034	P0vsP39_P0_hypo_dmr_6766|14|0.229|0.644	0	.
chr1	39640340	39640472	P0vsP39_P0_hypo_dmr_6777|3|0.429|0.742	0	.
chr1	39646361	39646386	P0vsP39_P0_hypo_dmr_6780|4|0.050|0.511	0	.
chr1	39666763	39667205	P0vsP39_P0_hypo_dmr_6788|23|0.170|0.841	0	.
chr1	39684168	39684209	P0vsP39_P0_hypo_dmr_6795|3|0.614|0.977	0	.
chr1	39694886	39695442	P0vsP39_P0_hypo_dmr_6799|12|0.277|0.720	0	.
chr1	39698609	39698874	P0vsP39_P0_hypo_dmr_6802|13|0.149|0.774	0	.
chr1	39700544	39702982	P0vsP39_P0_hypo_dmr_6803|58|0.218|0.707	0	.
chr1	39714516	39714570	P0vsP39_P0_hypo_dmr_6808|4|0.162|0.678	0	.
chr1	39720509	39720684	P0vsP39_P0_hypo_dmr_6810|8|0.082|0.550	0	.
chr1	39730736	39732450	P0vsP39_P0_hypo_dmr_6811|37|0.383|0.834	0	.
chr1	39736055	39736400	P0vsP39_P0_hypo_dmr_6812|9|0.374|0.836	0	.
chr1	39738769	39738921	P0vsP39_P0_hypo_dmr_6815|3|0.201|0.599	0	.
chr1	39746270	39746705	P0vsP39_P0_hypo_dmr_6819|15|0.125|0.569	0	.
chr1	39749764	39750000	P0vsP39_P0_hypo_dmr_6820|5|0.241|0.777	0	.
chr1	39756976	39757053	P0vsP39_P0_hypo_dmr_6822|6|0.276|0.779	0	.
chr1	39759648	39759903	P0vsP39_P0_hypo_dmr_6824|6|0.172|0.676	0	.
chr1	39770582	39770796	P0vsP39_P0_hypo_dmr_6825|9|0.404|0.951	0	.
chr1	39772739	39773194	P0vsP39_P0_hypo_dmr_6826|6|0.522|0.916	0	.
chr1	39773764	39774482	P0vsP39_P0_hypo_dmr_6827|12|0.303|0.604	0	.
chr1	39804557	39804870	P0vsP39_P0_hypo_dmr_6835|6|0.036|0.338	0	.
chr1	39838524	39839506	P0vsP39_P0_hypo_dmr_6848|26|0.226|0.773	0	.
chr1	39884588	39885321	P0vsP39_P0_hypo_dmr_6856|23|0.272|0.833	0	.
chr1	39888795	39888801	P0vsP39_P0_hypo_dmr_6857|4|0.287|0.800	0	.
chr1	39899099	39899220	P0vsP39_P0_hypo_dmr_6859|4|0.399|0.764	0	.
chr1	39921250	39921775	P0vsP39_P0_hypo_dmr_6867|11|0.418|0.744	0	.
chr1	39930125	39930144	P0vsP39_P0_hypo_dmr_6872|3|0.339|0.768	0	.
chr1	39932333	39933155	P0vsP39_P0_hypo_dmr_6874|28|0.452|0.852	0	.
chr1	39937633	39937848	P0vsP39_P0_hypo_dmr_6877|6|0.150|0.454	0	.
chr1	39947299	39948301	P0vsP39_P0_hypo_dmr_6882|27|0.040|0.518	0	.
chr1	39950588	39950917	P0vsP39_P0_hypo_dmr_6884|7|0.107|0.644	0	.
chr1	39972510	39973066	P0vsP39_P0_hypo_dmr_6894|25|0.123|0.708	0	.
chr1	39980596	39980684	P0vsP39_P0_hypo_dmr_6899|9|0.141|0.558	0	.
chr1	40057761	40058174	P0vsP39_P0_hypo_dmr_6925|13|0.324|0.756	0	.
chr1	40066592	40066714	P0vsP39_P0_hypo_dmr_6927|4|0.270|0.690	0	.
chr1	40092457	40092975	P0vsP39_P0_hypo_dmr_6930|15|0.046|0.560	0	.
chr1	40117690	40118145	P0vsP39_P0_hypo_dmr_6935|19|0.283|0.715	0	.
chr1	40129102	40129383	P0vsP39_P0_hypo_dmr_6936|5|0.502|0.898	0	.
chr1	40189579	40189711	P0vsP39_P0_hypo_dmr_6944|4|0.597|0.920	0	.
chr1	40227862	40228654	P0vsP39_P0_hypo_dmr_6951|13|0.513|0.884	0	.
chr1	40232420	40232506	P0vsP39_P0_hypo_dmr_6952|7|0.593|0.955	0	.
chr1	40234230	40234481	P0vsP39_P0_hypo_dmr_6953|5|0.335|0.835	0	.
chr1	40237370	40237530	P0vsP39_P0_hypo_dmr_6955|3|0.339|0.859	0	.
chr1	40257774	40257825	P0vsP39_P0_hypo_dmr_6959|4|0.357|0.796	0	.
chr1	40266916	40267284	P0vsP39_P0_hypo_dmr_6962|4|0.160|0.520	0	.
chr1	40284770	40284895	P0vsP39_P0_hypo_dmr_6966|8|0.508|0.922	0	.
chr1	40299452	40299652	P0vsP39_P0_hypo_dmr_6970|4|0.605|0.909	0	.
chr1	40321924	40322151	P0vsP39_P0_hypo_dmr_6977|7|0.496|0.904	0	.
chr1	40326083	40326723	P0vsP39_P0_hypo_dmr_6978|24|0.151|0.628	0	.
chr1	40341498	40341641	P0vsP39_P0_hypo_dmr_6980|8|0.139|0.706	0	.
chr1	40351907	40351989	P0vsP39_P0_hypo_dmr_6983|4|0.369|0.853	0	.
chr1	40352975	40353059	P0vsP39_P0_hypo_dmr_6984|3|0.421|0.926	0	.
chr1	40357699	40358041	P0vsP39_P0_hypo_dmr_6985|6|0.236|0.766	0	.
chr1	40367960	40368202	P0vsP39_P0_hypo_dmr_6990|4|0.591|0.912	0	.
chr1	40376899	40377030	P0vsP39_P0_hypo_dmr_6992|5|0.558|0.901	0	.
chr1	40415019	40415066	P0vsP39_P0_hypo_dmr_6997|4|0.331|0.819	0	.
chr1	40514513	40515467	P0vsP39_P0_hypo_dmr_7017|20|0.043|0.501	0	.
chr1	40547350	40548079	P0vsP39_P0_hypo_dmr_7027|19|0.338|0.643	0	.
chr1	40549947	40549985	P0vsP39_P0_hypo_dmr_7029|3|0.363|0.815	0	.
chr1	40579256	40579299	P0vsP39_P0_hypo_dmr_7032|3|0.228|0.757	0	.
chr1	40607885	40607911	P0vsP39_P0_hypo_dmr_7036|4|0.542|0.924	0	.
chr1	40628367	40629383	P0vsP39_P0_hypo_dmr_7041|14|0.504|0.826	0	.
chr1	40658319	40658359	P0vsP39_P0_hypo_dmr_7048|3|0.381|0.753	0	.
chr1	40665163	40667675	P0vsP39_P0_hypo_dmr_7051|31|0.485|0.819	0	.
chr1	40679807	40679917	P0vsP39_P0_hypo_dmr_7054|5|0.431|0.772	0	.
chr1	40682229	40682892	P0vsP39_P0_hypo_dmr_7055|14|0.487|0.831	0	.
chr1	40726257	40726765	P0vsP39_P0_hypo_dmr_7061|19|0.379|0.701	0	.
chr1	40734347	40734499	P0vsP39_P0_hypo_dmr_7065|3|0.535|0.849	0	.
chr1	40756417	40756497	P0vsP39_P0_hypo_dmr_7069|3|0.385|0.893	0	.
chr1	40763107	40763156	P0vsP39_P0_hypo_dmr_7071|4|0.401|0.866	0	.
chr1	40768914	40769862	P0vsP39_P0_hypo_dmr_7073|14|0.465|0.808	0	.
chr1	40788714	40789925	P0vsP39_P0_hypo_dmr_7078|18|0.095|0.417	0	.
chr1	40797681	40797695	P0vsP39_P0_hypo_dmr_7080|4|0.227|0.768	0	.
chr1	40842110	40842229	P0vsP39_P0_hypo_dmr_7093|3|0.333|0.817	0	.
chr1	40846298	40846385	P0vsP39_P0_hypo_dmr_7094|5|0.325|0.792	0	.
chr1	40878333	40878555	P0vsP39_P0_hypo_dmr_7102|6|0.287|0.664	0	.
chr1	40880358	40880765	P0vsP39_P0_hypo_dmr_7103|7|0.293|0.656	0	.
chr1	40881490	40881813	P0vsP39_P0_hypo_dmr_7104|9|0.255|0.838	0	.
chr1	40883443	40883555	P0vsP39_P0_hypo_dmr_7105|4|0.402|0.845	0	.
chr1	40894096	40894228	P0vsP39_P0_hypo_dmr_7109|7|0.390|0.938	0	.
chr1	40910136	40910351	P0vsP39_P0_hypo_dmr_7113|5|0.470|0.874	0	.
chr1	40913763	40913972	P0vsP39_P0_hypo_dmr_7114|6|0.044|0.574	0	.
chr1	40924833	40925246	P0vsP39_P0_hypo_dmr_7115|16|0.262|0.849	0	.
chr1	40943189	40943841	P0vsP39_P0_hypo_dmr_7120|17|0.246|0.798	0	.
chr1	40963200	40963230	P0vsP39_P0_hypo_dmr_7124|3|0.250|0.770	0	.
chr1	40972596	40972754	P0vsP39_P0_hypo_dmr_7127|8|0.524|0.965	0	.
chr1	40977199	40977281	P0vsP39_P0_hypo_dmr_7128|3|0.338|0.784	0	.
chr1	41005708	41005874	P0vsP39_P0_hypo_dmr_7136|8|0.243|0.588	0	.
chr1	41032674	41032741	P0vsP39_P0_hypo_dmr_7139|6|0.290|0.878	0	.
chr1	41034745	41035085	P0vsP39_P0_hypo_dmr_7141|11|0.150|0.470	0	.
chr1	41041163	41041196	P0vsP39_P0_hypo_dmr_7143|3|0.480|0.823	0	.
chr1	41065104	41065595	P0vsP39_P0_hypo_dmr_7148|20|0.156|0.704	0	.
chr1	41116369	41116394	P0vsP39_P0_hypo_dmr_7158|3|0.579|0.917	0	.
chr1	41121877	41122989	P0vsP39_P0_hypo_dmr_7161|26|0.270|0.662	0	.
chr1	41128660	41128787	P0vsP39_P0_hypo_dmr_7163|5|0.188|0.540	0	.
chr1	41140026	41140693	P0vsP39_P0_hypo_dmr_7166|9|0.190|0.623	0	.
chr1	41145655	41145678	P0vsP39_P0_hypo_dmr_7167|4|0.380|0.863	0	.
chr1	41152142	41152224	P0vsP39_P0_hypo_dmr_7168|6|0.185|0.622	0	.
chr1	41152978	41154484	P0vsP39_P0_hypo_dmr_7169|30|0.050|0.470	0	.
chr1	41155794	41157896	P0vsP39_P0_hypo_dmr_7170|52|0.164|0.634	0	.
chr1	41165706	41167826	P0vsP39_P0_hypo_dmr_7172|41|0.238|0.746	0	.
chr1	41168409	41168545	P0vsP39_P0_hypo_dmr_7173|7|0.229|0.899	0	.
chr1	41187929	41188233	P0vsP39_P0_hypo_dmr_7175|9|0.234|0.657	0	.
chr1	41189722	41190436	P0vsP39_P0_hypo_dmr_7176|10|0.499|0.879	0	.
chr1	41228114	41228510	P0vsP39_P0_hypo_dmr_7181|7|0.403|0.792	0	.
chr1	41236175	41236482	P0vsP39_P0_hypo_dmr_7183|3|0.210|0.562	0	.
chr1	41239740	41239752	P0vsP39_P0_hypo_dmr_7184|4|0.350|0.857	0	.
chr1	41243118	41243644	P0vsP39_P0_hypo_dmr_7186|12|0.428|0.870	0	.
chr1	41246463	41246855	P0vsP39_P0_hypo_dmr_7187|6|0.323|0.799	0	.
chr1	41261791	41261843	P0vsP39_P0_hypo_dmr_7190|4|0.366|0.848	0	.
chr1	41268734	41270793	P0vsP39_P0_hypo_dmr_7192|30|0.274|0.743	0	.
chr1	41271807	41273921	P0vsP39_P0_hypo_dmr_7193|28|0.388|0.775	0	.
chr1	41274745	41277018	P0vsP39_P0_hypo_dmr_7194|56|0.069|0.483	0	.
chr1	41285242	41285312	P0vsP39_P0_hypo_dmr_7197|7|0.419|0.913	0	.
chr1	41286401	41286845	P0vsP39_P0_hypo_dmr_7198|21|0.265|0.932	0	.
chr1	41326938	41327245	P0vsP39_P0_hypo_dmr_7202|6|0.015|0.444	0	.
chr1	41328200	41328933	P0vsP39_P0_hypo_dmr_7203|13|0.316|0.775	0	.
chr1	41353204	41353239	P0vsP39_P0_hypo_dmr_7209|4|0.033|0.571	0	.
chr1	41359246	41359310	P0vsP39_P0_hypo_dmr_7212|3|0.176|0.606	0	.
chr1	41361455	41361834	P0vsP39_P0_hypo_dmr_7214|8|0.213|0.815	0	.
chr1	41380251	41380672	P0vsP39_P0_hypo_dmr_7215|12|0.338|0.793	0	.
chr1	41390649	41391243	P0vsP39_P0_hypo_dmr_7219|19|0.310|0.692	0	.
chr1	41408886	41409005	P0vsP39_P0_hypo_dmr_7220|9|0.391|0.847	0	.
chr1	41411728	41412080	P0vsP39_P0_hypo_dmr_7221|6|0.207|0.661	0	.
chr1	41425681	41426031	P0vsP39_P0_hypo_dmr_7226|10|0.335|0.840	0	.
chr1	41428067	41430244	P0vsP39_P0_hypo_dmr_7227|43|0.223|0.571	0	.
chr1	41435159	41435764	P0vsP39_P0_hypo_dmr_7229|6|0.449|0.904	0	.
chr1	41446682	41446735	P0vsP39_P0_hypo_dmr_7230|5|0.044|0.371	0	.
chr1	41460137	41460331	P0vsP39_P0_hypo_dmr_7231|7|0.292|0.710	0	.
chr1	41506663	41506821	P0vsP39_P0_hypo_dmr_7236|6|0.124|0.576	0	.
chr1	41512327	41513003	P0vsP39_P0_hypo_dmr_7237|9|0.488|0.828	0	.
chr1	41555783	41556035	P0vsP39_P0_hypo_dmr_7241|6|0.085|0.649	0	.
chr1	41557325	41557565	P0vsP39_P0_hypo_dmr_7242|4|0.385|0.745	0	.
chr1	41560113	41560120	P0vsP39_P0_hypo_dmr_7243|3|0.251|0.734	0	.
chr1	41568450	41568533	P0vsP39_P0_hypo_dmr_7245|4|0.460|0.827	0	.
chr1	41603615	41606244	P0vsP39_P0_hypo_dmr_7249|55|0.037|0.480	0	.
chr1	41606759	41606857	P0vsP39_P0_hypo_dmr_7250|5|0.105|0.693	0	.
chr1	41608990	41609115	P0vsP39_P0_hypo_dmr_7251|5|0.045|0.585	0	.
chr1	41615631	41615651	P0vsP39_P0_hypo_dmr_7252|3|0.355|0.824	0	.
chr1	41616449	41616804	P0vsP39_P0_hypo_dmr_7253|14|0.218|0.673	0	.
chr1	41645904	41645983	P0vsP39_P0_hypo_dmr_7257|8|0.186|0.759	0	.
chr1	41651029	41653409	P0vsP39_P0_hypo_dmr_7259|44|0.040|0.508	0	.
chr1	41654065	41654477	P0vsP39_P0_hypo_dmr_7260|8|0.570|0.902	0	.
chr1	41676944	41677365	P0vsP39_P0_hypo_dmr_7266|25|0.099|0.680	0	.
chr1	41711988	41712257	P0vsP39_P0_hypo_dmr_7269|7|0.304|0.880	0	.
chr1	41712785	41713028	P0vsP39_P0_hypo_dmr_7270|7|0.567|0.891	0	.
chr1	41727726	41727787	P0vsP39_P0_hypo_dmr_7272|3|0.484|0.841	0	.
chr1	41741967	41743862	P0vsP39_P0_hypo_dmr_7275|40|0.063|0.552	0	.
chr1	41747180	41747564	P0vsP39_P0_hypo_dmr_7276|7|0.204|0.587	0	.
chr1	41749071	41749677	P0vsP39_P0_hypo_dmr_7277|11|0.236|0.607	0	.
chr1	41752115	41752730	P0vsP39_P0_hypo_dmr_7278|10|0.248|0.629	0	.
chr1	41759503	41759601	P0vsP39_P0_hypo_dmr_7280|5|0.345|0.732	0	.
chr1	41764983	41765050	P0vsP39_P0_hypo_dmr_7281|4|0.131|0.574	0	.
chr1	41783664	41783889	P0vsP39_P0_hypo_dmr_7284|4|0.479|0.791	0	.
chr1	41790091	41790133	P0vsP39_P0_hypo_dmr_7285|3|0.623|0.935	0	.
chr1	41808876	41809987	P0vsP39_P0_hypo_dmr_7287|21|0.212|0.699	0	.
chr1	41811496	41812777	P0vsP39_P0_hypo_dmr_7288|21|0.042|0.373	0	.
chr1	41813303	41815462	P0vsP39_P0_hypo_dmr_7289|36|0.155|0.643	0	.
chr1	41822592	41823006	P0vsP39_P0_hypo_dmr_7291|11|0.265|0.732	0	.
chr1	41826211	41826553	P0vsP39_P0_hypo_dmr_7295|5|0.103|0.613	0	.
chr1	41830967	41831227	P0vsP39_P0_hypo_dmr_7297|4|0.430|0.810	0	.
chr1	41833634	41833909	P0vsP39_P0_hypo_dmr_7299|5|0.199|0.637	0	.
chr1	41835781	41835939	P0vsP39_P0_hypo_dmr_7300|10|0.060|0.627	0	.
chr1	41889072	41889314	P0vsP39_P0_hypo_dmr_7305|8|0.125|0.529	0	.
chr1	41901732	41901907	P0vsP39_P0_hypo_dmr_7311|8|0.229|0.787	0	.
chr1	41912820	41912911	P0vsP39_P0_hypo_dmr_7315|6|0.247|0.704	0	.
chr1	41917115	41920208	P0vsP39_P0_hypo_dmr_7316|58|0.092|0.785	0	.
chr1	41934860	41935003	P0vsP39_P0_hypo_dmr_7317|4|0.557|0.900	0	.
chr1	41935969	41936652	P0vsP39_P0_hypo_dmr_7318|15|0.141|0.845	0	.
chr1	41946680	41947114	P0vsP39_P0_hypo_dmr_7320|9|0.406|0.845	0	.
chr1	41996890	41996956	P0vsP39_P0_hypo_dmr_7329|4|0.092|0.686	0	.
chr1	42007156	42007226	P0vsP39_P0_hypo_dmr_7332|4|0.136|0.591	0	.
chr1	42018727	42019126	P0vsP39_P0_hypo_dmr_7336|10|0.122|0.689	0	.
chr1	42019668	42019721	P0vsP39_P0_hypo_dmr_7337|6|0.210|0.633	0	.
chr1	42025622	42026182	P0vsP39_P0_hypo_dmr_7338|10|0.609|0.923	0	.
chr1	42062090	42062788	P0vsP39_P0_hypo_dmr_7344|12|0.503|0.813	0	.
chr1	42065206	42065286	P0vsP39_P0_hypo_dmr_7345|5|0.161|0.767	0	.
chr1	42082899	42083439	P0vsP39_P0_hypo_dmr_7350|8|0.156|0.631	0	.
chr1	42096306	42096658	P0vsP39_P0_hypo_dmr_7355|9|0.083|0.622	0	.
chr1	42107144	42107880	P0vsP39_P0_hypo_dmr_7357|14|0.126|0.799	0	.
chr1	42108544	42108578	P0vsP39_P0_hypo_dmr_7358|3|0.428|0.867	0	.
chr1	42113578	42113784	P0vsP39_P0_hypo_dmr_7359|7|0.493|0.832	0	.
chr1	42152230	42152431	P0vsP39_P0_hypo_dmr_7365|9|0.062|0.493	0	.
chr1	42170161	42170279	P0vsP39_P0_hypo_dmr_7368|5|0.210|0.682	0	.
chr1	42229098	42229630	P0vsP39_P0_hypo_dmr_7375|9|0.126|0.542	0	.
chr1	42231264	42234368	P0vsP39_P0_hypo_dmr_7376|73|0.197|0.706	0	.
chr1	42235296	42235564	P0vsP39_P0_hypo_dmr_7377|3|0.311|0.798	0	.
chr1	42236611	42236964	P0vsP39_P0_hypo_dmr_7378|3|0.426|0.730	0	.
chr1	42241135	42241677	P0vsP39_P0_hypo_dmr_7380|24|0.131|0.782	0	.
chr1	42242359	42243347	P0vsP39_P0_hypo_dmr_7381|34|0.106|0.623	0	.
chr1	42254746	42255278	P0vsP39_P0_hypo_dmr_7384|9|0.389|0.722	0	.
chr1	42277264	42278281	P0vsP39_P0_hypo_dmr_7391|13|0.311|0.613	0	.
chr1	42294457	42294554	P0vsP39_P0_hypo_dmr_7396|5|0.619|0.944	0	.
chr1	42295180	42295309	P0vsP39_P0_hypo_dmr_7397|7|0.442|0.884	0	.
chr1	42309716	42309806	P0vsP39_P0_hypo_dmr_7404|4|0.543|0.890	0	.
chr1	42323431	42323704	P0vsP39_P0_hypo_dmr_7408|3|0.409|0.776	0	.
chr1	42332310	42332507	P0vsP39_P0_hypo_dmr_7411|4|0.341|0.725	0	.
chr1	42347411	42348361	P0vsP39_P0_hypo_dmr_7413|21|0.450|0.834	0	.
chr1	42351589	42352718	P0vsP39_P0_hypo_dmr_7414|24|0.097|0.444	0	.
chr1	42355349	42355486	P0vsP39_P0_hypo_dmr_7416|5|0.430|0.868	0	.
chr1	42356613	42356703	P0vsP39_P0_hypo_dmr_7417|4|0.544|0.933	0	.
chr1	42365824	42366691	P0vsP39_P0_hypo_dmr_7419|10|0.433|0.830	0	.
chr1	42387221	42388202	P0vsP39_P0_hypo_dmr_7421|36|0.263|0.867	0	.
chr1	42398838	42399361	P0vsP39_P0_hypo_dmr_7425|15|0.058|0.789	0	.
chr1	42420544	42420625	P0vsP39_P0_hypo_dmr_7433|3|0.590|0.893	0	.
chr1	42425298	42425422	P0vsP39_P0_hypo_dmr_7435|7|0.585|0.941	0	.
chr1	42439971	42440061	P0vsP39_P0_hypo_dmr_7440|5|0.653|0.959	0	.
chr1	42444609	42445179	P0vsP39_P0_hypo_dmr_7441|17|0.408|0.849	0	.
chr1	42471958	42474533	P0vsP39_P0_hypo_dmr_7446|53|0.370|0.803	0	.
chr1	42476698	42476798	P0vsP39_P0_hypo_dmr_7447|5|0.599|0.946	0	.
chr1	42489491	42490275	P0vsP39_P0_hypo_dmr_7454|18|0.485|0.887	0	.
chr1	42497679	42497869	P0vsP39_P0_hypo_dmr_7458|7|0.214|0.729	0	.
chr1	42502129	42503158	P0vsP39_P0_hypo_dmr_7460|12|0.394|0.854	0	.
chr1	42503746	42505608	P0vsP39_P0_hypo_dmr_7461|43|0.281|0.739	0	.
chr1	42524353	42524875	P0vsP39_P0_hypo_dmr_7466|12|0.117|0.769	0	.
chr1	42537818	42539135	P0vsP39_P0_hypo_dmr_7469|23|0.318|0.751	0	.
chr1	42540600	42542457	P0vsP39_P0_hypo_dmr_7470|22|0.172|0.474	0	.
chr1	42543062	42543902	P0vsP39_P0_hypo_dmr_7471|33|0.165|0.619	0	.
chr1	42544458	42544534	P0vsP39_P0_hypo_dmr_7472|3|0.493|0.923	0	.
chr1	42559107	42559269	P0vsP39_P0_hypo_dmr_7475|3|0.434|0.846	0	.
chr1	42580842	42581049	P0vsP39_P0_hypo_dmr_7480|6|0.390|0.819	0	.
chr1	42601317	42601402	P0vsP39_P0_hypo_dmr_7487|8|0.265|0.823	0	.
chr1	42606386	42606517	P0vsP39_P0_hypo_dmr_7488|6|0.353|0.883	0	.
chr1	42625691	42626701	P0vsP39_P0_hypo_dmr_7492|10|0.465|0.769	0	.
chr1	42628880	42630480	P0vsP39_P0_hypo_dmr_7494|54|0.198|0.764	0	.
chr1	42636726	42636737	P0vsP39_P0_hypo_dmr_7495|3|0.072|0.385	0	.
chr1	42644205	42644484	P0vsP39_P0_hypo_dmr_7497|5|0.504|0.827	0	.
chr1	42648104	42649980	P0vsP39_P0_hypo_dmr_7498|25|0.140|0.716	0	.
chr1	42655477	42656179	P0vsP39_P0_hypo_dmr_7501|7|0.438|0.753	0	.
chr1	42673561	42673588	P0vsP39_P0_hypo_dmr_7508|4|0.188|0.634	0	.
chr1	42677446	42682175	P0vsP39_P0_hypo_dmr_7509|83|0.103|0.600	0	.
chr1	42683476	42683839	P0vsP39_P0_hypo_dmr_7510|16|0.077|0.544	0	.
chr1	42702083	42702441	P0vsP39_P0_hypo_dmr_7513|4|0.051|0.368	0	.
chr1	42704735	42708840	P0vsP39_P0_hypo_dmr_7515|112|0.046|0.592	0	.
chr1	42709348	42713250	P0vsP39_P0_hypo_dmr_7516|64|0.044|0.483	0	.
chr1	42714863	42715112	P0vsP39_P0_hypo_dmr_7517|9|0.258|0.776	0	.
chr1	42718259	42719757	P0vsP39_P0_hypo_dmr_7518|20|0.240|0.859	0	.
chr1	42721020	42721903	P0vsP39_P0_hypo_dmr_7519|19|0.213|0.712	0	.
chr1	42722428	42723638	P0vsP39_P0_hypo_dmr_7520|22|0.463|0.908	0	.
chr1	42735690	42735788	P0vsP39_P0_hypo_dmr_7523|8|0.587|0.927	0	.
chr1	42743745	42744047	P0vsP39_P0_hypo_dmr_7526|19|0.402|0.777	0	.
chr1	42763389	42765022	P0vsP39_P0_hypo_dmr_7530|21|0.192|0.607	0	.
chr1	42770201	42770922	P0vsP39_P0_hypo_dmr_7532|14|0.460|0.765	0	.
chr1	42771743	42772045	P0vsP39_P0_hypo_dmr_7533|17|0.359|0.903	0	.
chr1	42775130	42775437	P0vsP39_P0_hypo_dmr_7535|6|0.235|0.625	0	.
chr1	42780663	42780922	P0vsP39_P0_hypo_dmr_7536|9|0.271|0.660	0	.
chr1	42781635	42782378	P0vsP39_P0_hypo_dmr_7537|14|0.390|0.691	0	.
chr1	42782903	42783652	P0vsP39_P0_hypo_dmr_7538|14|0.346|0.845	0	.
chr1	42869272	42869329	P0vsP39_P0_hypo_dmr_7561|3|0.551|0.895	0	.
chr1	42872881	42873625	P0vsP39_P0_hypo_dmr_7563|13|0.418|0.765	0	.
chr1	42877352	42877561	P0vsP39_P0_hypo_dmr_7565|6|0.500|0.828	0	.
chr1	42888093	42889820	P0vsP39_P0_hypo_dmr_7567|62|0.244|0.821	0	.
chr1	42910415	42910718	P0vsP39_P0_hypo_dmr_7575|10|0.399|0.885	0	.
chr1	42921074	42921150	P0vsP39_P0_hypo_dmr_7578|8|0.388|0.820	0	.
chr1	42923954	42924340	P0vsP39_P0_hypo_dmr_7580|12|0.227|0.690	0	.
chr1	42946255	42946465	P0vsP39_P0_hypo_dmr_7586|10|0.037|0.585	0	.
chr1	43072300	43072341	P0vsP39_P0_hypo_dmr_7622|3|0.389|0.747	0	.
chr1	43077589	43077681	P0vsP39_P0_hypo_dmr_7625|5|0.479|0.895	0	.
chr1	43092410	43092548	P0vsP39_P0_hypo_dmr_7631|54|0.005|0.346	0	.
chr1	43186133	43187076	P0vsP39_P0_hypo_dmr_7668|21|0.161|0.791	0	.
chr1	43250370	43251397	P0vsP39_P0_hypo_dmr_7686|11|0.572|0.875	0	.
chr1	43266703	43267464	P0vsP39_P0_hypo_dmr_7688|16|0.354|0.674	0	.
chr1	43293674	43293766	P0vsP39_P0_hypo_dmr_7690|3|0.404|0.902	0	.
chr1	43301483	43301574	P0vsP39_P0_hypo_dmr_7693|3|0.407|0.723	0	.
chr1	43305892	43306200	P0vsP39_P0_hypo_dmr_7694|9|0.369|0.753	0	.
chr1	43306935	43307217	P0vsP39_P0_hypo_dmr_7695|5|0.327|0.912	0	.
chr1	43316632	43316700	P0vsP39_P0_hypo_dmr_7697|6|0.543|0.918	0	.
chr1	43317960	43318151	P0vsP39_P0_hypo_dmr_7698|4|0.131|0.589	0	.
chr1	43358181	43358880	P0vsP39_P0_hypo_dmr_7705|18|0.346|0.850	0	.
chr1	43375138	43375223	P0vsP39_P0_hypo_dmr_7709|5|0.417|0.806	0	.
chr1	43378932	43379086	P0vsP39_P0_hypo_dmr_7710|5|0.260|0.780	0	.
chr1	43396701	43396797	P0vsP39_P0_hypo_dmr_7715|6|0.244|0.890	0	.
chr1	43433163	43433254	P0vsP39_P0_hypo_dmr_7725|4|0.218|0.677	0	.
chr1	43459181	43459209	P0vsP39_P0_hypo_dmr_7735|3|0.301|0.793	0	.
chr1	43470963	43471035	P0vsP39_P0_hypo_dmr_7742|10|0.365|0.736	0	.
chr1	43475354	43475442	P0vsP39_P0_hypo_dmr_7747|4|0.172|0.745	0	.
chr1	43476665	43476788	P0vsP39_P0_hypo_dmr_7748|6|0.070|0.657	0	.
chr1	43497959	43498500	P0vsP39_P0_hypo_dmr_7760|17|0.192|0.737	0	.
chr1	43498977	43499677	P0vsP39_P0_hypo_dmr_7761|11|0.429|0.733	0	.
chr1	43538910	43539220	P0vsP39_P0_hypo_dmr_7777|7|0.089|0.430	0	.
chr1	43549762	43549844	P0vsP39_P0_hypo_dmr_7782|4|0.366|0.813	0	.
chr1	43553236	43553295	P0vsP39_P0_hypo_dmr_7784|3|0.139|0.860	0	.
chr1	43568676	43569163	P0vsP39_P0_hypo_dmr_7792|16|0.279|0.796	0	.
chr1	43594956	43595758	P0vsP39_P0_hypo_dmr_7799|15|0.359|0.792	0	.
chr1	43615926	43616289	P0vsP39_P0_hypo_dmr_7806|8|0.069|0.659	0	.
chr1	43633052	43633821	P0vsP39_P0_hypo_dmr_7808|14|0.091|0.742	0	.
chr1	43694402	43694728	P0vsP39_P0_hypo_dmr_7816|7|0.136|0.574	0	.
chr1	43730143	43730927	P0vsP39_P0_hypo_dmr_7823|35|0.231|0.816	0	.
chr1	43899384	43899930	P0vsP39_P0_hypo_dmr_7873|14|0.110|0.468	0	.
chr1	44331922	44331929	P0vsP39_P0_hypo_dmr_7959|3|0.134|0.490	0	.
chr1	44521825	44523089	P0vsP39_P0_hypo_dmr_7972|8|0.409|0.785	0	.
chr1	44552485	44553698	P0vsP39_P0_hypo_dmr_7973|31|0.035|0.571	0	.
chr1	44584945	44585295	P0vsP39_P0_hypo_dmr_7977|4|0.135|0.619	0	.
chr1	44586940	44587134	P0vsP39_P0_hypo_dmr_7978|6|0.354|0.888	0	.
chr1	44591388	44591969	P0vsP39_P0_hypo_dmr_7980|8|0.079|0.585	0	.
chr1	44626756	44626887	P0vsP39_P0_hypo_dmr_7987|4|0.321|0.733	0	.
chr1	44633740	44634137	P0vsP39_P0_hypo_dmr_7989|6|0.188|0.579	0	.
chr1	44645995	44646100	P0vsP39_P0_hypo_dmr_7991|3|0.492|0.793	0	.
chr1	44682076	44682732	P0vsP39_P0_hypo_dmr_7995|11|0.179|0.899	0	.
chr1	45504032	45504610	P0vsP39_P0_hypo_dmr_8070|9|0.230|0.683	0	.
chr1	45546328	45546708	P0vsP39_P0_hypo_dmr_8073|4|0.338|0.720	0	.
chr1	45575092	45575397	P0vsP39_P0_hypo_dmr_8078|7|0.114|0.724	0	.
chr1	45673246	45673301	P0vsP39_P0_hypo_dmr_8084|3|0.199|0.647	0	.
chr1	45765471	45765735	P0vsP39_P0_hypo_dmr_8095|3|0.340|0.656	0	.
chr1	45905092	45905288	P0vsP39_P0_hypo_dmr_8124|9|0.158|0.832	0	.
chr1	45926478	45927089	P0vsP39_P0_hypo_dmr_8130|21|0.289|0.785	0	.
chr1	45948726	45948782	P0vsP39_P0_hypo_dmr_8132|3|0.291|0.714	0	.
chr1	46180320	46180460	P0vsP39_P0_hypo_dmr_8147|3|0.171|0.556	0	.
chr1	46294699	46294715	P0vsP39_P0_hypo_dmr_8153|3|0.059|0.637	0	.
chr1	46296608	46296829	P0vsP39_P0_hypo_dmr_8154|4|0.458|0.760	0	.
chr1	46394085	46394188	P0vsP39_P0_hypo_dmr_8162|3|0.227|0.665	0	.
chr1	46395202	46395522	P0vsP39_P0_hypo_dmr_8163|3|0.304|0.693	0	.
chr1	46623371	46623718	P0vsP39_P0_hypo_dmr_8180|6|0.190|0.723	0	.
chr1	46734214	46734306	P0vsP39_P0_hypo_dmr_8187|4|0.028|0.798	0	.
chr1	46744276	46744685	P0vsP39_P0_hypo_dmr_8188|4|0.093|0.508	0	.
chr1	46746617	46746626	P0vsP39_P0_hypo_dmr_8189|4|0.346|0.841	0	.
chr1	46830043	46830303	P0vsP39_P0_hypo_dmr_8199|4|0.010|0.407	0	.
chr1	46866291	46866406	P0vsP39_P0_hypo_dmr_8211|3|0.416|0.770	0	.
chr1	46887555	46888261	P0vsP39_P0_hypo_dmr_8216|12|0.183|0.590	0	.
chr1	46893683	46894074	P0vsP39_P0_hypo_dmr_8217|6|0.351|0.669	0	.
chr1	47019334	47019401	P0vsP39_P0_hypo_dmr_8238|3|0.167|0.750	0	.
chr1	47020493	47020857	P0vsP39_P0_hypo_dmr_8239|5|0.268|0.678	0	.
chr1	47044703	47044859	P0vsP39_P0_hypo_dmr_8243|6|0.500|0.860	0	.
chr1	47094615	47094725	P0vsP39_P0_hypo_dmr_8255|6|0.099|0.643	0	.
chr1	47096367	47098115	P0vsP39_P0_hypo_dmr_8256|24|0.244|0.639	0	.
chr1	47102283	47102750	P0vsP39_P0_hypo_dmr_8258|5|0.097|0.433	0	.
chr1	47103687	47104345	P0vsP39_P0_hypo_dmr_8259|12|0.021|0.360	0	.
chr1	47120676	47120815	P0vsP39_P0_hypo_dmr_8265|4|0.220|0.675	0	.
chr1	47164537	47164732	P0vsP39_P0_hypo_dmr_8271|5|0.356|0.791	0	.
chr1	47278353	47279334	P0vsP39_P0_hypo_dmr_8285|12|0.146|0.691	0	.
chr1	47286942	47287008	P0vsP39_P0_hypo_dmr_8288|4|0.440|0.810	0	.
chr1	47310382	47310873	P0vsP39_P0_hypo_dmr_8292|6|0.077|0.608	0	.
chr1	47339566	47340134	P0vsP39_P0_hypo_dmr_8297|5|0.172|0.491	0	.
chr1	47340645	47341150	P0vsP39_P0_hypo_dmr_8298|11|0.261|0.687	0	.
chr1	47363579	47363614	P0vsP39_P0_hypo_dmr_8300|3|0.332|0.770	0	.
chr1	47405505	47405990	P0vsP39_P0_hypo_dmr_8305|3|0.328|0.684	0	.
chr1	47446211	47446643	P0vsP39_P0_hypo_dmr_8309|10|0.210|0.623	0	.
chr1	47447301	47447605	P0vsP39_P0_hypo_dmr_8310|5|0.346|0.798	0	.
chr1	47448211	47448386	P0vsP39_P0_hypo_dmr_8311|6|0.249|0.705	0	.
chr1	47448958	47449389	P0vsP39_P0_hypo_dmr_8312|7|0.111|0.490	0	.
chr1	47472898	47473238	P0vsP39_P0_hypo_dmr_8314|5|0.457|0.856	0	.
chr1	47475219	47475453	P0vsP39_P0_hypo_dmr_8315|3|0.217|0.671	0	.
chr1	47491666	47491921	P0vsP39_P0_hypo_dmr_8319|7|0.211|0.677	0	.
chr1	47603461	47603505	P0vsP39_P0_hypo_dmr_8327|6|0.269|0.849	0	.
chr1	47605707	47606365	P0vsP39_P0_hypo_dmr_8329|7|0.192|0.641	0	.
chr1	47607775	47607935	P0vsP39_P0_hypo_dmr_8330|5|0.278|0.834	0	.
chr1	47933061	47933569	P0vsP39_P0_hypo_dmr_8359|14|0.116|0.460	0	.
chr1	47944497	47944534	P0vsP39_P0_hypo_dmr_8361|3|0.458|0.920	0	.
chr1	47963075	47963192	P0vsP39_P0_hypo_dmr_8363|3|0.192|0.578	0	.
chr1	48276927	48277498	P0vsP39_P0_hypo_dmr_8391|8|0.264|0.748	0	.
chr1	48344569	48344786	P0vsP39_P0_hypo_dmr_8396|3|0.453|0.802	0	.
chr1	48411598	48411788	P0vsP39_P0_hypo_dmr_8402|5|0.354|0.780	0	.
chr1	48488963	48489214	P0vsP39_P0_hypo_dmr_8408|3|0.176|0.643	0	.
chr1	48532979	48533534	P0vsP39_P0_hypo_dmr_8412|6|0.257|0.658	0	.
chr1	48680016	48680110	P0vsP39_P0_hypo_dmr_8426|4|0.387|0.807	0	.
chr1	48837830	48837935	P0vsP39_P0_hypo_dmr_8439|6|0.399|0.953	0	.
chr1	49844793	49844863	P0vsP39_P0_hypo_dmr_8510|3|0.426|0.794	0	.
chr1	50067774	50067857	P0vsP39_P0_hypo_dmr_8530|3|0.432|0.743	0	.
chr1	50112864	50112966	P0vsP39_P0_hypo_dmr_8535|3|0.149|0.458	0	.
chr1	50131818	50132115	P0vsP39_P0_hypo_dmr_8536|3|0.277|0.577	0	.
chr1	50205634	50206109	P0vsP39_P0_hypo_dmr_8541|8|0.106|0.491	0	.
chr1	50629589	50629688	P0vsP39_P0_hypo_dmr_8571|3|0.329|0.673	0	.
chr1	50634062	50634115	P0vsP39_P0_hypo_dmr_8572|3|0.294|0.703	0	.
chr1	50668705	50668871	P0vsP39_P0_hypo_dmr_8575|3|0.418|0.780	0	.
chr1	50685665	50685697	P0vsP39_P0_hypo_dmr_8576|3|0.306|0.708	0	.
chr1	50798206	50798402	P0vsP39_P0_hypo_dmr_8592|6|0.131|0.615	0	.
chr1	50860104	50860667	P0vsP39_P0_hypo_dmr_8602|4|0.163|0.601	0	.
chr1	50897714	50897906	P0vsP39_P0_hypo_dmr_8606|12|0.090|0.655	0	.
chr1	50921000	50921573	P0vsP39_P0_hypo_dmr_8609|5|0.386|0.787	0	.
chr1	51025249	51025390	P0vsP39_P0_hypo_dmr_8641|4|0.429|0.846	0	.
chr1	51029568	51029777	P0vsP39_P0_hypo_dmr_8643|3|0.197|0.546	0	.
chr1	51040314	51040373	P0vsP39_P0_hypo_dmr_8648|5|0.368|0.829	0	.
chr1	51054588	51054696	P0vsP39_P0_hypo_dmr_8652|3|0.355|0.727	0	.
chr1	51076254	51076818	P0vsP39_P0_hypo_dmr_8658|21|0.138|0.613	0	.
chr1	51094565	51094831	P0vsP39_P0_hypo_dmr_8666|4|0.052|0.514	0	.
chr1	51125655	51125987	P0vsP39_P0_hypo_dmr_8677|17|0.071|0.614	0	.
chr1	51126522	51126618	P0vsP39_P0_hypo_dmr_8678|7|0.192|0.797	0	.
chr1	51139174	51139511	P0vsP39_P0_hypo_dmr_8682|10|0.334|0.851	0	.
chr1	51140447	51140717	P0vsP39_P0_hypo_dmr_8683|5|0.369|0.742	0	.
chr1	51153033	51153134	P0vsP39_P0_hypo_dmr_8688|5|0.402|0.736	0	.
chr1	51154920	51155026	P0vsP39_P0_hypo_dmr_8690|4|0.197|0.583	0	.
chr1	51171018	51171325	P0vsP39_P0_hypo_dmr_8694|5|0.207|0.640	0	.
chr1	51211640	51211731	P0vsP39_P0_hypo_dmr_8703|6|0.089|0.701	0	.
chr1	51215847	51217029	P0vsP39_P0_hypo_dmr_8705|11|0.370|0.818	0	.
chr1	51230009	51230064	P0vsP39_P0_hypo_dmr_8711|3|0.552|0.891	0	.
chr1	51244756	51244780	P0vsP39_P0_hypo_dmr_8715|4|0.383|0.911	0	.
chr1	51270731	51270809	P0vsP39_P0_hypo_dmr_8721|8|0.279|0.782	0	.
chr1	51271958	51274246	P0vsP39_P0_hypo_dmr_8722|39|0.195|0.772	0	.
chr1	51288180	51289358	P0vsP39_P0_hypo_dmr_8724|16|0.387|0.762	0	.
chr1	51289914	51291014	P0vsP39_P0_hypo_dmr_8725|18|0.276|0.833	0	.
chr1	51335527	51335551	P0vsP39_P0_hypo_dmr_8734|3|0.415|0.744	0	.
chr1	51344029	51344748	P0vsP39_P0_hypo_dmr_8738|10|0.340|0.699	0	.
chr1	51348613	51349878	P0vsP39_P0_hypo_dmr_8740|23|0.451|0.838	0	.
chr1	51359833	51360299	P0vsP39_P0_hypo_dmr_8744|23|0.149|0.761	0	.
chr1	51361173	51361714	P0vsP39_P0_hypo_dmr_8745|25|0.378|0.893	0	.
chr1	51382971	51383312	P0vsP39_P0_hypo_dmr_8753|9|0.349|0.781	0	.
chr1	51410828	51411190	P0vsP39_P0_hypo_dmr_8760|8|0.368|0.848	0	.
chr1	51415517	51415663	P0vsP39_P0_hypo_dmr_8762|4|0.051|0.467	0	.
chr1	51455232	51455516	P0vsP39_P0_hypo_dmr_8768|6|0.048|0.705	0	.
chr1	51504422	51504569	P0vsP39_P0_hypo_dmr_8781|9|0.103|0.755	0	.
chr1	51515878	51515958	P0vsP39_P0_hypo_dmr_8785|3|0.076|0.480	0	.
chr1	51529726	51530742	P0vsP39_P0_hypo_dmr_8788|17|0.344|0.843	0	.
chr1	51540024	51540161	P0vsP39_P0_hypo_dmr_8789|13|0.435|0.896	0	.
chr1	51579356	51580489	P0vsP39_P0_hypo_dmr_8796|18|0.198|0.565	0	.
chr1	51582243	51582664	P0vsP39_P0_hypo_dmr_8797|14|0.197|0.739	0	.
chr1	51590908	51592064	P0vsP39_P0_hypo_dmr_8801|20|0.120|0.449	0	.
chr1	51594417	51594747	P0vsP39_P0_hypo_dmr_8803|10|0.349|0.853	0	.
chr1	51607093	51608063	P0vsP39_P0_hypo_dmr_8807|28|0.098|0.728	0	.
chr1	51608634	51609633	P0vsP39_P0_hypo_dmr_8808|18|0.413|0.800	0	.
chr1	51613210	51613377	P0vsP39_P0_hypo_dmr_8810|4|0.569|0.905	0	.
chr1	51617269	51618848	P0vsP39_P0_hypo_dmr_8812|35|0.155|0.680	0	.
chr1	51622030	51622850	P0vsP39_P0_hypo_dmr_8814|16|0.271|0.806	0	.
chr1	51628286	51628597	P0vsP39_P0_hypo_dmr_8817|10|0.068|0.467	0	.
chr1	51635952	51637046	P0vsP39_P0_hypo_dmr_8819|27|0.364|0.820	0	.
chr1	51646486	51646668	P0vsP39_P0_hypo_dmr_8820|4|0.557|0.894	0	.
chr1	51647369	51647790	P0vsP39_P0_hypo_dmr_8821|13|0.397|0.911	0	.
chr1	51649723	51650931	P0vsP39_P0_hypo_dmr_8823|14|0.165|0.624	0	.
chr1	51671350	51671788	P0vsP39_P0_hypo_dmr_8827|5|0.074|0.472	0	.
chr1	51677813	51678025	P0vsP39_P0_hypo_dmr_8828|8|0.282|0.745	0	.
chr1	51688152	51688250	P0vsP39_P0_hypo_dmr_8832|3|0.044|0.348	0	.
chr1	51696772	51697726	P0vsP39_P0_hypo_dmr_8835|27|0.083|0.463	0	.
chr1	51746406	51747011	P0vsP39_P0_hypo_dmr_8844|8|0.479|0.838	0	.
chr1	51759890	51760020	P0vsP39_P0_hypo_dmr_8849|5|0.536|0.851	0	.
chr1	51768117	51768488	P0vsP39_P0_hypo_dmr_8852|9|0.331|0.757	0	.
chr1	51795325	51795382	P0vsP39_P0_hypo_dmr_8865|4|0.550|0.901	0	.
chr1	51797950	51798579	P0vsP39_P0_hypo_dmr_8867|13|0.249|0.601	0	.
chr1	51804460	51805247	P0vsP39_P0_hypo_dmr_8870|26|0.220|0.860	0	.
chr1	51842113	51842435	P0vsP39_P0_hypo_dmr_8880|7|0.522|0.852	0	.
chr1	51843278	51843805	P0vsP39_P0_hypo_dmr_8881|5|0.458|0.835	0	.
chr1	51878805	51879860	P0vsP39_P0_hypo_dmr_8894|27|0.376|0.787	0	.
chr1	51885509	51885603	P0vsP39_P0_hypo_dmr_8896|6|0.218|0.774	0	.
chr1	51895513	51896328	P0vsP39_P0_hypo_dmr_8899|24|0.346|0.773	0	.
chr1	51897132	51897176	P0vsP39_P0_hypo_dmr_8900|5|0.072|0.509	0	.
chr1	51914874	51914996	P0vsP39_P0_hypo_dmr_8907|8|0.048|0.392	0	.
chr1	51922529	51923189	P0vsP39_P0_hypo_dmr_8909|15|0.206|0.524	0	.
chr1	51928490	51928658	P0vsP39_P0_hypo_dmr_8911|6|0.354|0.758	0	.
chr1	51931657	51932287	P0vsP39_P0_hypo_dmr_8913|10|0.382|0.703	0	.
chr1	51937127	51937230	P0vsP39_P0_hypo_dmr_8916|4|0.360|0.819	0	.
chr1	51945498	51945688	P0vsP39_P0_hypo_dmr_8919|3|0.365|0.718	0	.
chr1	51947234	51947989	P0vsP39_P0_hypo_dmr_8920|14|0.275|0.885	0	.
chr1	51969092	51969543	P0vsP39_P0_hypo_dmr_8924|3|0.364|0.769	0	.
chr1	51977010	51977366	P0vsP39_P0_hypo_dmr_8926|6|0.334|0.842	0	.
chr1	51996944	51997605	P0vsP39_P0_hypo_dmr_8929|20|0.090|0.610	0	.
chr1	52009113	52009973	P0vsP39_P0_hypo_dmr_8931|12|0.224|0.547	0	.
chr1	52012728	52013048	P0vsP39_P0_hypo_dmr_8933|8|0.535|0.884	0	.
chr1	52042357	52043678	P0vsP39_P0_hypo_dmr_8939|14|0.295|0.637	0	.
chr1	52051353	52051806	P0vsP39_P0_hypo_dmr_8941|3|0.417|0.732	0	.
chr1	52059392	52059943	P0vsP39_P0_hypo_dmr_8943|12|0.119|0.742	0	.
chr1	52076565	52076911	P0vsP39_P0_hypo_dmr_8946|10|0.413|0.835	0	.
chr1	52079510	52081190	P0vsP39_P0_hypo_dmr_8947|42|0.052|0.732	0	.
chr1	52088771	52089123	P0vsP39_P0_hypo_dmr_8949|7|0.381|0.832	0	.
chr1	52106683	52106874	P0vsP39_P0_hypo_dmr_8953|5|0.153|0.645	0	.
chr1	52129138	52129269	P0vsP39_P0_hypo_dmr_8959|8|0.356|0.889	0	.
chr1	52243143	52243338	P0vsP39_P0_hypo_dmr_9005|12|0.226|0.846	0	.
chr1	52257892	52258128	P0vsP39_P0_hypo_dmr_9008|7|0.385|0.705	0	.
chr1	52305821	52307370	P0vsP39_P0_hypo_dmr_9019|44|0.176|0.735	0	.
chr1	52422622	52422880	P0vsP39_P0_hypo_dmr_9036|4|0.399|0.784	0	.
chr1	52462528	52463306	P0vsP39_P0_hypo_dmr_9047|11|0.409|0.772	0	.
chr1	52524740	52524757	P0vsP39_P0_hypo_dmr_9064|4|0.283|0.655	0	.
chr1	52556204	52556381	P0vsP39_P0_hypo_dmr_9067|4|0.584|0.919	0	.
chr1	52625095	52625174	P0vsP39_P0_hypo_dmr_9080|5|0.485|0.823	0	.
chr1	52668792	52669201	P0vsP39_P0_hypo_dmr_9093|10|0.195|0.800	0	.
chr1	52674035	52674343	P0vsP39_P0_hypo_dmr_9097|6|0.396|0.771	0	.
chr1	52676242	52676315	P0vsP39_P0_hypo_dmr_9098|3|0.332|0.739	0	.
chr1	52683838	52683863	P0vsP39_P0_hypo_dmr_9101|3|0.567|0.922	0	.
chr1	52733750	52733782	P0vsP39_P0_hypo_dmr_9119|3|0.253|0.801	0	.
chr1	52755489	52755562	P0vsP39_P0_hypo_dmr_9122|3|0.275|0.610	0	.
chr1	52782886	52783042	P0vsP39_P0_hypo_dmr_9128|4|0.582|0.884	0	.
chr1	52912068	52912127	P0vsP39_P0_hypo_dmr_9149|4|0.438|0.854	0	.
chr1	53020266	53020314	P0vsP39_P0_hypo_dmr_9172|3|0.108|0.536	0	.
chr1	53059410	53059681	P0vsP39_P0_hypo_dmr_9176|9|0.419|0.847	0	.
chr1	53060467	53061067	P0vsP39_P0_hypo_dmr_9177|19|0.182|0.830	0	.
chr1	53069762	53069825	P0vsP39_P0_hypo_dmr_9181|4|0.285|0.847	0	.
chr1	53085384	53085506	P0vsP39_P0_hypo_dmr_9183|10|0.436|0.780	0	.
chr1	53086174	53086254	P0vsP39_P0_hypo_dmr_9184|4|0.498|0.922	0	.
chr1	53170089	53170173	P0vsP39_P0_hypo_dmr_9194|6|0.260|0.667	0	.
chr1	53290159	53290231	P0vsP39_P0_hypo_dmr_9217|4|0.398|0.845	0	.
chr1	53384187	53384413	P0vsP39_P0_hypo_dmr_9234|9|0.034|0.544	0	.
chr1	53426258	53426631	P0vsP39_P0_hypo_dmr_9242|4|0.314|0.711	0	.
chr1	53440745	53440855	P0vsP39_P0_hypo_dmr_9245|6|0.270|0.743	0	.
chr1	53525029	53525035	P0vsP39_P0_hypo_dmr_9259|3|0.373|0.694	0	.
chr1	53581649	53581891	P0vsP39_P0_hypo_dmr_9268|6|0.234|0.658	0	.
chr1	53630077	53630386	P0vsP39_P0_hypo_dmr_9277|12|0.187|0.631	0	.
chr1	53740640	53741328	P0vsP39_P0_hypo_dmr_9293|8|0.059|0.503	0	.
chr1	53746061	53746105	P0vsP39_P0_hypo_dmr_9295|4|0.335|0.916	0	.
chr1	53747694	53747762	P0vsP39_P0_hypo_dmr_9296|7|0.328|0.786	0	.
chr1	53748336	53749644	P0vsP39_P0_hypo_dmr_9297|21|0.255|0.774	0	.
chr1	53773998	53774193	P0vsP39_P0_hypo_dmr_9301|4|0.234|0.584	0	.
chr1	53809329	53809743	P0vsP39_P0_hypo_dmr_9309|11|0.180|0.708	0	.
chr1	53820055	53820279	P0vsP39_P0_hypo_dmr_9315|6|0.062|0.446	0	.
chr1	53854768	53854810	P0vsP39_P0_hypo_dmr_9327|4|0.146|0.607	0	.
chr1	53866368	53866868	P0vsP39_P0_hypo_dmr_9332|6|0.072|0.491	0	.
chr1	53924250	53924345	P0vsP39_P0_hypo_dmr_9347|3|0.452|0.845	0	.
chr1	53925272	53925721	P0vsP39_P0_hypo_dmr_9348|15|0.236|0.675	0	.
chr1	53929073	53929184	P0vsP39_P0_hypo_dmr_9349|5|0.516|0.944	0	.
chr1	54109378	54109393	P0vsP39_P0_hypo_dmr_9409|3|0.310|0.651	0	.
chr1	54309283	54309673	P0vsP39_P0_hypo_dmr_9457|8|0.514|0.876	0	.
chr1	54451073	54451117	P0vsP39_P0_hypo_dmr_9483|3|0.494|0.929	0	.
chr1	54473932	54474026	P0vsP39_P0_hypo_dmr_9488|3|0.331|0.821	0	.
chr1	54522119	54522423	P0vsP39_P0_hypo_dmr_9504|7|0.154|0.715	0	.
chr1	54531433	54531536	P0vsP39_P0_hypo_dmr_9508|3|0.443|0.769	0	.
chr1	54577436	54577605	P0vsP39_P0_hypo_dmr_9519|5|0.259|0.627	0	.
chr1	54585481	54585773	P0vsP39_P0_hypo_dmr_9520|18|0.030|0.729	0	.
chr1	54586274	54586400	P0vsP39_P0_hypo_dmr_9521|5|0.142|0.629	0	.
chr1	54639483	54641310	P0vsP39_P0_hypo_dmr_9528|26|0.142|0.666	0	.
chr1	54647353	54648739	P0vsP39_P0_hypo_dmr_9529|24|0.244|0.711	0	.
chr1	54650990	54651556	P0vsP39_P0_hypo_dmr_9530|13|0.446|0.859	0	.
chr1	54659167	54659267	P0vsP39_P0_hypo_dmr_9532|3|0.240|0.750	0	.
chr1	54664794	54665276	P0vsP39_P0_hypo_dmr_9533|13|0.258|0.803	0	.
chr1	54675615	54676391	P0vsP39_P0_hypo_dmr_9535|6|0.511|0.843	0	.
chr1	54677047	54677416	P0vsP39_P0_hypo_dmr_9536|8|0.142|0.774	0	.
chr1	54690500	54690907	P0vsP39_P0_hypo_dmr_9540|11|0.267|0.591	0	.
chr1	54699685	54699777	P0vsP39_P0_hypo_dmr_9543|5|0.381|0.833	0	.
chr1	54701426	54701497	P0vsP39_P0_hypo_dmr_9544|6|0.424|0.860	0	.
chr1	54713806	54713873	P0vsP39_P0_hypo_dmr_9549|3|0.221|0.629	0	.
chr1	54715066	54715803	P0vsP39_P0_hypo_dmr_9551|13|0.130|0.514	0	.
chr1	54737448	54737500	P0vsP39_P0_hypo_dmr_9556|4|0.296|0.835	0	.
chr1	54739235	54739349	P0vsP39_P0_hypo_dmr_9557|4|0.139|0.685	0	.
chr1	54741116	54741159	P0vsP39_P0_hypo_dmr_9558|3|0.429|0.913	0	.
chr1	54744241	54744457	P0vsP39_P0_hypo_dmr_9560|9|0.224|0.761	0	.
chr1	54757873	54757931	P0vsP39_P0_hypo_dmr_9565|6|0.293|0.684	0	.
chr1	54762089	54763235	P0vsP39_P0_hypo_dmr_9566|30|0.171|0.877	0	.
chr1	54764460	54764619	P0vsP39_P0_hypo_dmr_9567|6|0.380|0.839	0	.
chr1	54767391	54767589	P0vsP39_P0_hypo_dmr_9569|6|0.102|0.771	0	.
chr1	54772994	54773104	P0vsP39_P0_hypo_dmr_9570|7|0.399|0.836	0	.
chr1	54776245	54776310	P0vsP39_P0_hypo_dmr_9571|3|0.640|0.942	0	.
chr1	54789761	54790146	P0vsP39_P0_hypo_dmr_9572|13|0.403|0.922	0	.
chr1	54791439	54791564	P0vsP39_P0_hypo_dmr_9573|6|0.037|0.799	0	.
chr1	54801356	54801513	P0vsP39_P0_hypo_dmr_9574|3|0.216|0.768	0	.
chr1	54802227	54802938	P0vsP39_P0_hypo_dmr_9575|27|0.292|0.882	0	.
chr1	54815685	54815695	P0vsP39_P0_hypo_dmr_9578|4|0.506|0.858	0	.
chr1	54826589	54827105	P0vsP39_P0_hypo_dmr_9581|5|0.461|0.826	0	.
chr1	54830107	54830630	P0vsP39_P0_hypo_dmr_9583|12|0.360|0.750	0	.
chr1	54833747	54833947	P0vsP39_P0_hypo_dmr_9584|3|0.344|0.713	0	.
chr1	54843191	54843858	P0vsP39_P0_hypo_dmr_9587|10|0.250|0.759	0	.
chr1	54846764	54846872	P0vsP39_P0_hypo_dmr_9588|3|0.313|0.778	0	.
chr1	54853298	54854195	P0vsP39_P0_hypo_dmr_9591|27|0.220|0.913	0	.
chr1	54862106	54862662	P0vsP39_P0_hypo_dmr_9594|10|0.390|0.844	0	.
chr1	54864506	54864812	P0vsP39_P0_hypo_dmr_9595|11|0.403|0.716	0	.
chr1	54867562	54868656	P0vsP39_P0_hypo_dmr_9597|25|0.204|0.586	0	.
chr1	54876632	54877896	P0vsP39_P0_hypo_dmr_9600|25|0.314|0.725	0	.
chr1	54899358	54899571	P0vsP39_P0_hypo_dmr_9605|8|0.252|0.636	0	.
chr1	54907033	54908053	P0vsP39_P0_hypo_dmr_9608|25|0.505|0.815	0	.
chr1	54909219	54909643	P0vsP39_P0_hypo_dmr_9609|13|0.308|0.866	0	.
chr1	54922517	54923145	P0vsP39_P0_hypo_dmr_9612|27|0.155|0.718	0	.
chr1	54924677	54925466	P0vsP39_P0_hypo_dmr_9613|19|0.213|0.611	0	.
chr1	54931099	54931141	P0vsP39_P0_hypo_dmr_9614|4|0.330|0.834	0	.
chr1	54944568	54945298	P0vsP39_P0_hypo_dmr_9616|9|0.310|0.702	0	.
chr1	55193305	55193674	P0vsP39_P0_hypo_dmr_9686|5|0.305|0.785	0	.
chr1	55196486	55196786	P0vsP39_P0_hypo_dmr_9688|6|0.545|0.848	0	.
chr1	55198612	55198962	P0vsP39_P0_hypo_dmr_9689|6|0.042|0.562	0	.
chr1	55205262	55206323	P0vsP39_P0_hypo_dmr_9691|19|0.331|0.793	0	.
chr1	55215290	55215683	P0vsP39_P0_hypo_dmr_9694|16|0.232|0.746	0	.
chr1	55224045	55226310	P0vsP39_P0_hypo_dmr_9695|42|0.335|0.736	0	.
chr1	55227806	55228120	P0vsP39_P0_hypo_dmr_9696|4|0.568|0.868	0	.
chr1	55341332	55341444	P0vsP39_P0_hypo_dmr_9712|6|0.288|0.856	0	.
chr1	55346613	55346683	P0vsP39_P0_hypo_dmr_9714|4|0.180|0.673	0	.
chr1	55412738	55412841	P0vsP39_P0_hypo_dmr_9725|8|0.239|0.821	0	.
chr1	55417273	55417710	P0vsP39_P0_hypo_dmr_9728|9|0.201|0.822	0	.
chr1	55427591	55427743	P0vsP39_P0_hypo_dmr_9731|4|0.249|0.613	0	.
chr1	55437988	55438880	P0vsP39_P0_hypo_dmr_9734|19|0.267|0.693	0	.
chr1	55449977	55450054	P0vsP39_P0_hypo_dmr_9735|3|0.484|0.883	0	.
chr1	55463876	55464118	P0vsP39_P0_hypo_dmr_9740|4|0.228|0.643	0	.
chr1	55475208	55475342	P0vsP39_P0_hypo_dmr_9743|7|0.404|0.882	0	.
chr1	55492153	55492420	P0vsP39_P0_hypo_dmr_9745|14|0.304|0.872	0	.
chr1	55496594	55496620	P0vsP39_P0_hypo_dmr_9746|3|0.537|0.967	0	.
chr1	55501084	55501359	P0vsP39_P0_hypo_dmr_9747|4|0.131|0.758	0	.
chr1	55511931	55512241	P0vsP39_P0_hypo_dmr_9751|9|0.499|0.855	0	.
chr1	55560015	55560327	P0vsP39_P0_hypo_dmr_9764|13|0.039|0.397	0	.
chr1	55588229	55588482	P0vsP39_P0_hypo_dmr_9769|12|0.138|0.754	0	.
chr1	55623482	55623592	P0vsP39_P0_hypo_dmr_9776|4|0.057|0.766	0	.
chr1	55629551	55630167	P0vsP39_P0_hypo_dmr_9778|11|0.344|0.792	0	.
chr1	55650798	55651057	P0vsP39_P0_hypo_dmr_9781|6|0.124|0.796	0	.
chr1	55653761	55653818	P0vsP39_P0_hypo_dmr_9783|6|0.327|0.905	0	.
chr1	55659273	55661466	P0vsP39_P0_hypo_dmr_9785|35|0.354|0.758	0	.
chr1	55665188	55667683	P0vsP39_P0_hypo_dmr_9786|41|0.167|0.559	0	.
chr1	55668497	55668966	P0vsP39_P0_hypo_dmr_9787|9|0.185|0.665	0	.
chr1	55671353	55671521	P0vsP39_P0_hypo_dmr_9789|6|0.072|0.476	0	.
chr1	55672766	55672853	P0vsP39_P0_hypo_dmr_9790|4|0.517|0.920	0	.
chr1	55675041	55675392	P0vsP39_P0_hypo_dmr_9791|12|0.102|0.843	0	.
chr1	55677794	55677849	P0vsP39_P0_hypo_dmr_9793|4|0.304|0.904	0	.
chr1	55681507	55681658	P0vsP39_P0_hypo_dmr_9794|8|0.081|0.706	0	.
chr1	55686391	55686413	P0vsP39_P0_hypo_dmr_9796|3|0.223|0.551	0	.
chr1	55692647	55692802	P0vsP39_P0_hypo_dmr_9797|3|0.512|0.877	0	.
chr1	55700732	55701345	P0vsP39_P0_hypo_dmr_9800|12|0.199|0.855	0	.
chr1	55701924	55702290	P0vsP39_P0_hypo_dmr_9801|9|0.375|0.677	0	.
chr1	55704702	55705389	P0vsP39_P0_hypo_dmr_9802|16|0.073|0.621	0	.
chr1	55705988	55707191	P0vsP39_P0_hypo_dmr_9803|13|0.214|0.765	0	.
chr1	55736397	55736894	P0vsP39_P0_hypo_dmr_9809|6|0.160|0.534	0	.
chr1	55863422	55863434	P0vsP39_P0_hypo_dmr_9826|3|0.321|0.756	0	.
chr1	55882844	55883496	P0vsP39_P0_hypo_dmr_9830|9|0.181|0.781	0	.
chr1	55886951	55888455	P0vsP39_P0_hypo_dmr_9831|27|0.072|0.431	0	.
chr1	55913493	55915053	P0vsP39_P0_hypo_dmr_9839|32|0.142|0.519	0	.
chr1	55919328	55920083	P0vsP39_P0_hypo_dmr_9843|6|0.219|0.533	0	.
chr1	55974250	55974616	P0vsP39_P0_hypo_dmr_9859|6|0.045|0.731	0	.
chr1	55977756	55978383	P0vsP39_P0_hypo_dmr_9860|8|0.192|0.652	0	.
chr1	56002647	56002897	P0vsP39_P0_hypo_dmr_9865|6|0.126|0.761	0	.
chr1	56009534	56009808	P0vsP39_P0_hypo_dmr_9867|7|0.529|0.856	0	.
chr1	56021162	56021180	P0vsP39_P0_hypo_dmr_9868|3|0.607|0.958	0	.
chr1	56036342	56036426	P0vsP39_P0_hypo_dmr_9870|4|0.106|0.703	0	.
chr1	56144403	56144952	P0vsP39_P0_hypo_dmr_9881|8|0.534|0.902	0	.
chr1	56151086	56151304	P0vsP39_P0_hypo_dmr_9884|7|0.385|0.763	0	.
chr1	56164174	56164596	P0vsP39_P0_hypo_dmr_9886|5|0.113|0.434	0	.
chr1	56169341	56169395	P0vsP39_P0_hypo_dmr_9888|3|0.394|0.793	0	.
chr1	56171417	56171482	P0vsP39_P0_hypo_dmr_9890|3|0.353|0.722	0	.
chr1	56239843	56240058	P0vsP39_P0_hypo_dmr_9906|8|0.163|0.638	0	.
chr1	56257143	56257645	P0vsP39_P0_hypo_dmr_9918|13|0.090|0.564	0	.
chr1	56290643	56290700	P0vsP39_P0_hypo_dmr_9923|3|0.494|0.856	0	.
chr1	56321495	56321778	P0vsP39_P0_hypo_dmr_9929|7|0.394|0.833	0	.
chr1	56336329	56336497	P0vsP39_P0_hypo_dmr_9931|6|0.223|0.730	0	.
chr1	56344951	56345753	P0vsP39_P0_hypo_dmr_9934|20|0.097|0.519	0	.
chr1	56346858	56346944	P0vsP39_P0_hypo_dmr_9935|4|0.258|0.696	0	.
chr1	56352915	56353034	P0vsP39_P0_hypo_dmr_9937|7|0.338|0.827	0	.
chr1	56359559	56359988	P0vsP39_P0_hypo_dmr_9939|7|0.420|0.864	0	.
chr1	56361092	56361122	P0vsP39_P0_hypo_dmr_9941|4|0.246|0.701	0	.
chr1	56387117	56387327	P0vsP39_P0_hypo_dmr_9944|9|0.361|0.785	0	.
chr1	56395847	56396161	P0vsP39_P0_hypo_dmr_9946|12|0.094|0.778	0	.
chr1	56397357	56398275	P0vsP39_P0_hypo_dmr_9947|9|0.226|0.741	0	.
chr1	56399035	56399241	P0vsP39_P0_hypo_dmr_9948|4|0.138|0.680	0	.
chr1	56402600	56404541	P0vsP39_P0_hypo_dmr_9950|17|0.276|0.711	0	.
chr1	56405761	56405855	P0vsP39_P0_hypo_dmr_9951|6|0.095|0.638	0	.
chr1	56407773	56407833	P0vsP39_P0_hypo_dmr_9952|3|0.225|0.844	0	.
chr1	56530945	56531011	P0vsP39_P0_hypo_dmr_9963|3|0.222|0.679	0	.
chr1	56531872	56531877	P0vsP39_P0_hypo_dmr_9964|3|0.602|0.925	0	.
chr1	56541905	56541958	P0vsP39_P0_hypo_dmr_9967|5|0.486|0.921	0	.
chr1	56555708	56555750	P0vsP39_P0_hypo_dmr_9971|4|0.379|0.732	0	.
chr1	56627034	56627193	P0vsP39_P0_hypo_dmr_9986|4|0.529|0.857	0	.
chr1	56658692	56658811	P0vsP39_P0_hypo_dmr_9992|4|0.307|0.839	0	.
chr1	56670185	56672209	P0vsP39_P0_hypo_dmr_9996|22|0.542|0.851	0	.
chr1	56675285	56675364	P0vsP39_P0_hypo_dmr_9998|3|0.390|0.846	0	.
chr1	56710568	56710697	P0vsP39_P0_hypo_dmr_10004|4|0.506|0.846	0	.
chr1	56724364	56724382	P0vsP39_P0_hypo_dmr_10005|3|0.331|0.874	0	.
chr1	56725979	56727038	P0vsP39_P0_hypo_dmr_10006|10|0.205|0.744	0	.
chr1	56733142	56733498	P0vsP39_P0_hypo_dmr_10008|15|0.455|0.813	0	.
chr1	56749586	56750212	P0vsP39_P0_hypo_dmr_10013|28|0.125|0.672	0	.
chr1	56768839	56769251	P0vsP39_P0_hypo_dmr_10017|6|0.394|0.791	0	.
chr1	56779741	56780755	P0vsP39_P0_hypo_dmr_10018|21|0.136|0.703	0	.
chr1	56800539	56801121	P0vsP39_P0_hypo_dmr_10024|16|0.174|0.524	0	.
chr1	56834864	56835232	P0vsP39_P0_hypo_dmr_10041|9|0.156|0.717	0	.
chr1	56908519	56908849	P0vsP39_P0_hypo_dmr_10076|5|0.171|0.522	0	.
chr1	56917966	56917990	P0vsP39_P0_hypo_dmr_10081|3|0.122|0.527	0	.
chr1	56928517	56928606	P0vsP39_P0_hypo_dmr_10085|3|0.071|0.466	0	.
chr1	56982022	56985449	P0vsP39_P0_hypo_dmr_10100|145|0.109|0.623	0	.
chr1	56996614	56996674	P0vsP39_P0_hypo_dmr_10104|5|0.194|0.804	0	.
chr1	57009232	57009585	P0vsP39_P0_hypo_dmr_10106|6|0.257|0.699	0	.
chr1	57011754	57012086	P0vsP39_P0_hypo_dmr_10107|13|0.152|0.728	0	.
chr1	57034696	57034789	P0vsP39_P0_hypo_dmr_10111|4|0.171|0.879	0	.
chr1	57040052	57040652	P0vsP39_P0_hypo_dmr_10113|15|0.122|0.437	0	.
chr1	57047338	57047624	P0vsP39_P0_hypo_dmr_10115|12|0.462|0.900	0	.
chr1	57054065	57054572	P0vsP39_P0_hypo_dmr_10116|4|0.448|0.821	0	.
chr1	57057837	57057963	P0vsP39_P0_hypo_dmr_10118|5|0.175|0.688	0	.
chr1	57058683	57059876	P0vsP39_P0_hypo_dmr_10119|14|0.469|0.775	0	.
chr1	57082658	57083737	P0vsP39_P0_hypo_dmr_10124|36|0.259|0.774	0	.
chr1	57107406	57107657	P0vsP39_P0_hypo_dmr_10130|14|0.246|0.685	0	.
chr1	57120764	57121039	P0vsP39_P0_hypo_dmr_10133|3|0.450|0.861	0	.
chr1	57139066	57139261	P0vsP39_P0_hypo_dmr_10138|6|0.287|0.791	0	.
chr1	57158168	57158513	P0vsP39_P0_hypo_dmr_10140|12|0.148|0.616	0	.
chr1	57168691	57168752	P0vsP39_P0_hypo_dmr_10142|8|0.188|0.581	0	.
chr1	57174153	57175015	P0vsP39_P0_hypo_dmr_10144|29|0.185|0.826	0	.
chr1	57206103	57207574	P0vsP39_P0_hypo_dmr_10149|24|0.220|0.532	0	.
chr1	57208324	57210048	P0vsP39_P0_hypo_dmr_10150|36|0.372|0.848	0	.
chr1	57210830	57211840	P0vsP39_P0_hypo_dmr_10151|22|0.074|0.644	0	.
chr1	57213459	57213497	P0vsP39_P0_hypo_dmr_10153|10|0.016|0.535	0	.
chr1	57217527	57219420	P0vsP39_P0_hypo_dmr_10154|40|0.124|0.853	0	.
chr1	57221215	57221501	P0vsP39_P0_hypo_dmr_10155|6|0.462|0.912	0	.
chr1	57244296	57244598	P0vsP39_P0_hypo_dmr_10160|7|0.272|0.824	0	.
chr1	57266939	57267786	P0vsP39_P0_hypo_dmr_10169|21|0.101|0.476	0	.
chr1	57288062	57288668	P0vsP39_P0_hypo_dmr_10173|15|0.192|0.627	0	.
chr1	57294633	57295308	P0vsP39_P0_hypo_dmr_10174|13|0.490|0.830	0	.
chr1	57325230	57326808	P0vsP39_P0_hypo_dmr_10179|44|0.199|0.817	0	.
chr1	57327625	57328275	P0vsP39_P0_hypo_dmr_10180|17|0.507|0.873	0	.
chr1	57328775	57330841	P0vsP39_P0_hypo_dmr_10181|48|0.141|0.673	0	.
chr1	57333202	57334202	P0vsP39_P0_hypo_dmr_10183|23|0.253|0.757	0	.
chr1	57341023	57341294	P0vsP39_P0_hypo_dmr_10184|8|0.190|0.832	0	.
chr1	57342143	57342918	P0vsP39_P0_hypo_dmr_10185|9|0.326|0.693	0	.
chr1	57345590	57346591	P0vsP39_P0_hypo_dmr_10186|14|0.506|0.901	0	.
chr1	57349069	57349139	P0vsP39_P0_hypo_dmr_10187|4|0.279|0.678	0	.
chr1	57440960	57440974	P0vsP39_P0_hypo_dmr_10211|4|0.517|0.944	0	.
chr1	57449197	57449755	P0vsP39_P0_hypo_dmr_10213|9|0.501|0.877	0	.
chr1	57479496	57480201	P0vsP39_P0_hypo_dmr_10218|14|0.317|0.713	0	.
chr1	57483369	57483536	P0vsP39_P0_hypo_dmr_10219|5|0.503|0.821	0	.
chr1	57484147	57484170	P0vsP39_P0_hypo_dmr_10220|3|0.538|0.911	0	.
chr1	57484835	57485847	P0vsP39_P0_hypo_dmr_10221|15|0.569|0.910	0	.
chr1	57489312	57489370	P0vsP39_P0_hypo_dmr_10222|3|0.184|0.486	0	.
chr1	57496842	57497949	P0vsP39_P0_hypo_dmr_10225|17|0.183|0.723	0	.
chr1	57543906	57544254	P0vsP39_P0_hypo_dmr_10232|11|0.224|0.776	0	.
chr1	57564917	57564944	P0vsP39_P0_hypo_dmr_10233|3|0.363|0.723	0	.
chr1	57573739	57573998	P0vsP39_P0_hypo_dmr_10237|5|0.556|0.879	0	.
chr1	57607865	57609592	P0vsP39_P0_hypo_dmr_10246|42|0.044|0.617	0	.
chr1	57612169	57613479	P0vsP39_P0_hypo_dmr_10247|26|0.354|0.737	0	.
chr1	57623576	57623703	P0vsP39_P0_hypo_dmr_10251|7|0.458|0.946	0	.
chr1	57673141	57674518	P0vsP39_P0_hypo_dmr_10262|21|0.343|0.741	0	.
chr1	57703085	57704316	P0vsP39_P0_hypo_dmr_10272|18|0.395|0.874	0	.
chr1	57707624	57708365	P0vsP39_P0_hypo_dmr_10274|11|0.288|0.637	0	.
chr1	57732198	57732441	P0vsP39_P0_hypo_dmr_10280|5|0.168|0.681	0	.
chr1	57736041	57736172	P0vsP39_P0_hypo_dmr_10281|7|0.220|0.728	0	.
chr1	57741693	57742238	P0vsP39_P0_hypo_dmr_10283|19|0.389|0.797	0	.
chr1	57745580	57746226	P0vsP39_P0_hypo_dmr_10285|11|0.439|0.896	0	.
chr1	57747441	57747486	P0vsP39_P0_hypo_dmr_10286|3|0.217|0.711	0	.
chr1	57749461	57750053	P0vsP39_P0_hypo_dmr_10288|13|0.458|0.900	0	.
chr1	57776496	57777440	P0vsP39_P0_hypo_dmr_10294|9|0.190|0.514	0	.
chr1	57782367	57782770	P0vsP39_P0_hypo_dmr_10296|12|0.370|0.695	0	.
chr1	57790072	57790338	P0vsP39_P0_hypo_dmr_10299|11|0.277|0.680	0	.
chr1	57801049	57801964	P0vsP39_P0_hypo_dmr_10303|15|0.305|0.669	0	.
chr1	57805902	57806057	P0vsP39_P0_hypo_dmr_10305|3|0.427|0.731	0	.
chr1	57833564	57834595	P0vsP39_P0_hypo_dmr_10313|17|0.395|0.830	0	.
chr1	57846427	57847663	P0vsP39_P0_hypo_dmr_10318|34|0.333|0.793	0	.
chr1	57853093	57854219	P0vsP39_P0_hypo_dmr_10320|16|0.382|0.735	0	.
chr1	57861968	57862537	P0vsP39_P0_hypo_dmr_10321|10|0.066|0.490	0	.
chr1	57872035	57872554	P0vsP39_P0_hypo_dmr_10325|16|0.309|0.749	0	.
chr1	57873502	57873593	P0vsP39_P0_hypo_dmr_10326|3|0.420|0.922	0	.
chr1	57875223	57876009	P0vsP39_P0_hypo_dmr_10328|22|0.028|0.393	0	.
chr1	57885032	57885080	P0vsP39_P0_hypo_dmr_10332|3|0.198|0.592	0	.
chr1	57890320	57891100	P0vsP39_P0_hypo_dmr_10334|11|0.444|0.751	0	.
chr1	57918819	57919054	P0vsP39_P0_hypo_dmr_10342|7|0.451|0.845	0	.
chr1	57940050	57942449	P0vsP39_P0_hypo_dmr_10346|57|0.430|0.800	0	.
chr1	57947779	57947813	P0vsP39_P0_hypo_dmr_10349|3|0.190|0.817	0	.
chr1	57948398	57948477	P0vsP39_P0_hypo_dmr_10350|6|0.508|0.817	0	.
chr1	57967245	57967630	P0vsP39_P0_hypo_dmr_10357|9|0.282|0.633	0	.
chr1	58029942	58031272	P0vsP39_P0_hypo_dmr_10372|37|0.321|0.660	0	.
chr1	58054574	58055093	P0vsP39_P0_hypo_dmr_10378|10|0.405|0.834	0	.
chr1	58089452	58089679	P0vsP39_P0_hypo_dmr_10387|5|0.310|0.806	0	.
chr1	58093195	58093301	P0vsP39_P0_hypo_dmr_10389|4|0.386|0.843	0	.
chr1	58102778	58102801	P0vsP39_P0_hypo_dmr_10391|4|0.578|0.953	0	.
chr1	58114232	58114337	P0vsP39_P0_hypo_dmr_10395|4|0.358|0.867	0	.
chr1	58117613	58118078	P0vsP39_P0_hypo_dmr_10396|8|0.111|0.854	0	.
chr1	58135925	58136595	P0vsP39_P0_hypo_dmr_10400|10|0.313|0.847	0	.
chr1	58171292	58172004	P0vsP39_P0_hypo_dmr_10413|15|0.449|0.824	0	.
chr1	58176210	58176480	P0vsP39_P0_hypo_dmr_10414|5|0.248|0.571	0	.
chr1	58188623	58189036	P0vsP39_P0_hypo_dmr_10417|3|0.466|0.839	0	.
chr1	58191191	58191309	P0vsP39_P0_hypo_dmr_10418|3|0.312|0.769	0	.
chr1	58194089	58194146	P0vsP39_P0_hypo_dmr_10419|3|0.316|0.685	0	.
chr1	58215696	58216632	P0vsP39_P0_hypo_dmr_10426|29|0.181|0.683	0	.
chr1	58219537	58219675	P0vsP39_P0_hypo_dmr_10428|3|0.357|0.681	0	.
chr1	58220436	58222885	P0vsP39_P0_hypo_dmr_10430|35|0.278|0.717	0	.
chr1	58226673	58226809	P0vsP39_P0_hypo_dmr_10431|5|0.459|0.905	0	.
chr1	58261694	58261880	P0vsP39_P0_hypo_dmr_10436|4|0.271|0.780	0	.
chr1	58262957	58263146	P0vsP39_P0_hypo_dmr_10438|5|0.547|0.861	0	.
chr1	58275863	58276286	P0vsP39_P0_hypo_dmr_10439|12|0.297|0.733	0	.
chr1	58278389	58278546	P0vsP39_P0_hypo_dmr_10440|4|0.617|0.936	0	.
chr1	58279389	58279579	P0vsP39_P0_hypo_dmr_10441|5|0.239|0.875	0	.
chr1	58281180	58281995	P0vsP39_P0_hypo_dmr_10442|22|0.126|0.605	0	.
chr1	58304319	58304613	P0vsP39_P0_hypo_dmr_10446|13|0.240|0.541	0	.
chr1	58315438	58315708	P0vsP39_P0_hypo_dmr_10448|3|0.282|0.667	0	.
chr1	58713931	58713987	P0vsP39_P0_hypo_dmr_10549|4|0.114|0.540	0	.
chr1	58716337	58716467	P0vsP39_P0_hypo_dmr_10550|8|0.235|0.737	0	.
chr1	58761882	58762101	P0vsP39_P0_hypo_dmr_10567|5|0.463|0.884	0	.
chr1	58795086	58795685	P0vsP39_P0_hypo_dmr_10575|26|0.053|0.553	0	.
chr1	58896581	58896589	P0vsP39_P0_hypo_dmr_10599|3|0.350|0.903	0	.
chr1	58951433	58951514	P0vsP39_P0_hypo_dmr_10620|10|0.173|0.544	0	.
chr1	58968743	58969404	P0vsP39_P0_hypo_dmr_10630|14|0.089|0.486	0	.
chr1	59021498	59021591	P0vsP39_P0_hypo_dmr_10645|5|0.426|0.877	0	.
chr1	59070576	59071316	P0vsP39_P0_hypo_dmr_10648|10|0.405|0.735	0	.
chr1	59164112	59164469	P0vsP39_P0_hypo_dmr_10670|12|0.287|0.644	0	.
chr1	59256661	59257904	P0vsP39_P0_hypo_dmr_10686|23|0.313|0.626	0	.
chr1	59279508	59279604	P0vsP39_P0_hypo_dmr_10690|6|0.271|0.864	0	.
chr1	59306291	59306354	P0vsP39_P0_hypo_dmr_10698|5|0.417|0.851	0	.
chr1	59309256	59309388	P0vsP39_P0_hypo_dmr_10699|14|0.084|0.582	0	.
chr1	59311280	59311368	P0vsP39_P0_hypo_dmr_10702|3|0.347|0.718	0	.
chr1	59314834	59316483	P0vsP39_P0_hypo_dmr_10704|32|0.074|0.524	0	.
chr1	59322392	59322694	P0vsP39_P0_hypo_dmr_10706|6|0.477|0.882	0	.
chr1	59326817	59328348	P0vsP39_P0_hypo_dmr_10708|42|0.302|0.857	0	.
chr1	59332338	59334675	P0vsP39_P0_hypo_dmr_10709|51|0.153|0.587	0	.
chr1	59340775	59342568	P0vsP39_P0_hypo_dmr_10711|45|0.167|0.583	0	.
chr1	59354067	59354220	P0vsP39_P0_hypo_dmr_10714|3|0.368|0.682	0	.
chr1	59367932	59368510	P0vsP39_P0_hypo_dmr_10718|18|0.474|0.900	0	.
chr1	59369228	59369467	P0vsP39_P0_hypo_dmr_10719|7|0.555|0.890	0	.
chr1	59376231	59376797	P0vsP39_P0_hypo_dmr_10721|31|0.043|0.599	0	.
chr1	59381530	59381808	P0vsP39_P0_hypo_dmr_10724|7|0.444|0.904	0	.
chr1	59383078	59383119	P0vsP39_P0_hypo_dmr_10725|3|0.381|0.749	0	.
chr1	59383646	59383782	P0vsP39_P0_hypo_dmr_10726|6|0.452|0.953	0	.
chr1	59385908	59385950	P0vsP39_P0_hypo_dmr_10727|4|0.375|0.803	0	.
chr1	59391570	59391784	P0vsP39_P0_hypo_dmr_10728|6|0.421|0.777	0	.
chr1	59394116	59396285	P0vsP39_P0_hypo_dmr_10730|46|0.187|0.835	0	.
chr1	59396943	59397790	P0vsP39_P0_hypo_dmr_10731|12|0.440|0.864	0	.
chr1	59398436	59399474	P0vsP39_P0_hypo_dmr_10732|14|0.525|0.897	0	.
chr1	59414512	59415136	P0vsP39_P0_hypo_dmr_10733|15|0.363|0.929	0	.
chr1	59422264	59423759	P0vsP39_P0_hypo_dmr_10735|34|0.144|0.579	0	.
chr1	59434095	59434334	P0vsP39_P0_hypo_dmr_10738|5|0.223|0.824	0	.
chr1	59437633	59438481	P0vsP39_P0_hypo_dmr_10739|17|0.245|0.813	0	.
chr1	59447934	59450128	P0vsP39_P0_hypo_dmr_10741|42|0.476|0.781	0	.
chr1	59450715	59450744	P0vsP39_P0_hypo_dmr_10742|4|0.465|0.955	0	.
chr1	59451432	59451873	P0vsP39_P0_hypo_dmr_10743|17|0.166|0.634	0	.
chr1	59467305	59467433	P0vsP39_P0_hypo_dmr_10749|5|0.481|0.916	0	.
chr1	59472513	59472846	P0vsP39_P0_hypo_dmr_10751|12|0.103|0.506	0	.
chr1	59480406	59481296	P0vsP39_P0_hypo_dmr_10754|44|0.057|0.569	0	.
chr1	59484188	59488608	P0vsP39_P0_hypo_dmr_10755|130|0.200|0.746	0	.
chr1	59494074	59494148	P0vsP39_P0_hypo_dmr_10758|9|0.292|0.912	0	.
chr1	59498330	59498468	P0vsP39_P0_hypo_dmr_10760|4|0.550|0.956	0	.
chr1	59503815	59504002	P0vsP39_P0_hypo_dmr_10762|3|0.356|0.768	0	.
chr1	59508170	59508877	P0vsP39_P0_hypo_dmr_10763|18|0.294|0.692	0	.
chr1	59511707	59512180	P0vsP39_P0_hypo_dmr_10765|12|0.271|0.765	0	.
chr1	59518738	59519330	P0vsP39_P0_hypo_dmr_10767|7|0.603|0.905	0	.
chr1	59523529	59524432	P0vsP39_P0_hypo_dmr_10769|11|0.449|0.760	0	.
chr1	59534697	59535168	P0vsP39_P0_hypo_dmr_10772|8|0.079|0.629	0	.
chr1	59541735	59541861	P0vsP39_P0_hypo_dmr_10775|6|0.176|0.875	0	.
chr1	59542409	59542515	P0vsP39_P0_hypo_dmr_10776|5|0.529|0.897	0	.
chr1	59553680	59554194	P0vsP39_P0_hypo_dmr_10781|16|0.175|0.895	0	.
chr1	59584299	59585696	P0vsP39_P0_hypo_dmr_10789|27|0.230|0.585	0	.
chr1	59590247	59590809	P0vsP39_P0_hypo_dmr_10790|15|0.379|0.912	0	.
chr1	59591336	59591994	P0vsP39_P0_hypo_dmr_10791|10|0.517|0.855	0	.
chr1	59604080	59604318	P0vsP39_P0_hypo_dmr_10792|18|0.240|0.713	0	.
chr1	59605474	59605689	P0vsP39_P0_hypo_dmr_10793|5|0.264|0.722	0	.
chr1	59609083	59609142	P0vsP39_P0_hypo_dmr_10795|3|0.330|0.802	0	.
chr1	59616720	59616825	P0vsP39_P0_hypo_dmr_10797|5|0.300|0.888	0	.
chr1	59625189	59625666	P0vsP39_P0_hypo_dmr_10799|12|0.367|0.886	0	.
chr1	59629108	59629490	P0vsP39_P0_hypo_dmr_10800|9|0.376|0.855	0	.
chr1	59730290	59731177	P0vsP39_P0_hypo_dmr_10831|17|0.335|0.736	0	.
chr1	59739453	59739949	P0vsP39_P0_hypo_dmr_10833|20|0.415|0.837	0	.
chr1	59743394	59743442	P0vsP39_P0_hypo_dmr_10834|4|0.522|0.958	0	.
chr1	59788696	59790249	P0vsP39_P0_hypo_dmr_10844|25|0.052|0.407	0	.
chr1	59795557	59795893	P0vsP39_P0_hypo_dmr_10846|4|0.237|0.763	0	.
chr1	59887563	59887841	P0vsP39_P0_hypo_dmr_10886|6|0.102|0.520	0	.
chr1	59979318	59979349	P0vsP39_P0_hypo_dmr_10922|3|0.331|0.741	0	.
chr1	60019991	60020181	P0vsP39_P0_hypo_dmr_10935|11|0.402|0.877	0	.
chr1	60031880	60032021	P0vsP39_P0_hypo_dmr_10937|6|0.213|0.816	0	.
chr1	60137351	60137573	P0vsP39_P0_hypo_dmr_10964|12|0.365|0.756	0	.
chr1	60155226	60155583	P0vsP39_P0_hypo_dmr_10968|7|0.287|0.676	0	.
chr1	60361150	60361265	P0vsP39_P0_hypo_dmr_11024|10|0.333|0.647	0	.
chr1	60568876	60568904	P0vsP39_P0_hypo_dmr_11106|3|0.526|0.865	0	.
chr1	60626923	60628519	P0vsP39_P0_hypo_dmr_11120|30|0.247|0.865	0	.
chr1	60639665	60639693	P0vsP39_P0_hypo_dmr_11122|4|0.037|0.531	0	.
chr1	60645278	60645584	P0vsP39_P0_hypo_dmr_11123|3|0.308|0.754	0	.
chr1	60646210	60646469	P0vsP39_P0_hypo_dmr_11124|9|0.311|0.814	0	.
chr1	60646936	60646966	P0vsP39_P0_hypo_dmr_11125|3|0.545|0.905	0	.
chr1	60648854	60650101	P0vsP39_P0_hypo_dmr_11126|24|0.478|0.841	0	.
chr1	60694897	60694931	P0vsP39_P0_hypo_dmr_11137|4|0.357|0.925	0	.
chr1	60715494	60716005	P0vsP39_P0_hypo_dmr_11142|13|0.159|0.532	0	.
chr1	60759756	60759873	P0vsP39_P0_hypo_dmr_11152|5|0.399|0.930	0	.
chr1	60788002	60788065	P0vsP39_P0_hypo_dmr_11158|3|0.449|0.877	0	.
chr1	60843713	60843928	P0vsP39_P0_hypo_dmr_11172|6|0.156|0.545	0	.
chr1	60851086	60851801	P0vsP39_P0_hypo_dmr_11175|17|0.105|0.663	0	.
chr1	60868406	60868537	P0vsP39_P0_hypo_dmr_11183|10|0.068|0.631	0	.
chr1	60893977	60894185	P0vsP39_P0_hypo_dmr_11192|4|0.556|0.874	0	.
chr1	60902602	60902985	P0vsP39_P0_hypo_dmr_11194|6|0.053|0.359	0	.
chr1	60931240	60931460	P0vsP39_P0_hypo_dmr_11204|4|0.077|0.540	0	.
chr1	60942151	60942239	P0vsP39_P0_hypo_dmr_11207|4|0.237|0.709	0	.
chr1	60947294	60947350	P0vsP39_P0_hypo_dmr_11208|4|0.340|0.837	0	.
chr1	60973426	60973561	P0vsP39_P0_hypo_dmr_11216|3|0.309|0.814	0	.
chr1	60979142	60979380	P0vsP39_P0_hypo_dmr_11218|8|0.313|0.772	0	.
chr1	60991750	60992011	P0vsP39_P0_hypo_dmr_11221|5|0.530|0.844	0	.
chr1	61000122	61000204	P0vsP39_P0_hypo_dmr_11224|5|0.527|0.924	0	.
chr1	61004572	61004998	P0vsP39_P0_hypo_dmr_11225|11|0.191|0.638	0	.
chr1	61014591	61014758	P0vsP39_P0_hypo_dmr_11226|4|0.371|0.832	0	.
chr1	61035254	61035572	P0vsP39_P0_hypo_dmr_11233|3|0.393|0.719	0	.
chr1	61062007	61062630	P0vsP39_P0_hypo_dmr_11240|8|0.160|0.659	0	.
chr1	61081440	61082009	P0vsP39_P0_hypo_dmr_11245|11|0.255|0.759	0	.
chr1	61090786	61091308	P0vsP39_P0_hypo_dmr_11247|7|0.335|0.794	0	.
chr1	61099469	61099906	P0vsP39_P0_hypo_dmr_11249|3|0.362|0.781	0	.
chr1	61102710	61103017	P0vsP39_P0_hypo_dmr_11251|7|0.224|0.677	0	.
chr1	61119431	61119522	P0vsP39_P0_hypo_dmr_11254|3|0.418|0.881	0	.
chr1	61123638	61124037	P0vsP39_P0_hypo_dmr_11255|6|0.127|0.882	0	.
chr1	61130684	61130787	P0vsP39_P0_hypo_dmr_11258|8|0.352|0.846	0	.
chr1	61131397	61131439	P0vsP39_P0_hypo_dmr_11259|6|0.094|0.774	0	.
chr1	61140943	61141209	P0vsP39_P0_hypo_dmr_11262|11|0.177|0.900	0	.
chr1	61141824	61144018	P0vsP39_P0_hypo_dmr_11263|45|0.427|0.788	0	.
chr1	61145022	61146817	P0vsP39_P0_hypo_dmr_11264|35|0.095|0.755	0	.
chr1	61172876	61172926	P0vsP39_P0_hypo_dmr_11272|3|0.509|0.834	0	.
chr1	61175247	61175365	P0vsP39_P0_hypo_dmr_11274|3|0.295|0.649	0	.
chr1	61188046	61188152	P0vsP39_P0_hypo_dmr_11276|5|0.461|0.794	0	.
chr1	61198056	61199226	P0vsP39_P0_hypo_dmr_11280|15|0.173|0.776	0	.
chr1	61202369	61202452	P0vsP39_P0_hypo_dmr_11281|4|0.387|0.779	0	.
chr1	61203232	61203794	P0vsP39_P0_hypo_dmr_11282|26|0.065|0.391	0	.
chr1	61205046	61205815	P0vsP39_P0_hypo_dmr_11283|14|0.270|0.798	0	.
chr1	61233808	61234893	P0vsP39_P0_hypo_dmr_11285|18|0.227|0.640	0	.
chr1	61236757	61237050	P0vsP39_P0_hypo_dmr_11286|5|0.074|0.740	0	.
chr1	61264868	61266667	P0vsP39_P0_hypo_dmr_11291|37|0.157|0.865	0	.
chr1	61269295	61270022	P0vsP39_P0_hypo_dmr_11292|18|0.293|0.797	0	.
chr1	61273775	61274558	P0vsP39_P0_hypo_dmr_11294|12|0.110|0.671	0	.
chr1	61276315	61276411	P0vsP39_P0_hypo_dmr_11295|4|0.054|0.615	0	.
chr1	61296791	61297406	P0vsP39_P0_hypo_dmr_11300|12|0.314|0.682	0	.
chr1	61298842	61299072	P0vsP39_P0_hypo_dmr_11301|11|0.270|0.887	0	.
chr1	61300045	61303135	P0vsP39_P0_hypo_dmr_11302|99|0.162|0.671	0	.
chr1	61309994	61310336	P0vsP39_P0_hypo_dmr_11304|9|0.176|0.727	0	.
chr1	61312629	61312894	P0vsP39_P0_hypo_dmr_11305|5|0.099|0.629	0	.
chr1	61319794	61319984	P0vsP39_P0_hypo_dmr_11306|8|0.627|0.948	0	.
chr1	61331936	61332189	P0vsP39_P0_hypo_dmr_11310|5|0.161|0.720	0	.
chr1	61336268	61336503	P0vsP39_P0_hypo_dmr_11311|6|0.233|0.797	0	.
chr1	61349637	61349746	P0vsP39_P0_hypo_dmr_11316|4|0.609|0.977	0	.
chr1	61353610	61353934	P0vsP39_P0_hypo_dmr_11317|8|0.098|0.648	0	.
chr1	61358407	61359968	P0vsP39_P0_hypo_dmr_11318|42|0.196|0.729	0	.
chr1	61378341	61380845	P0vsP39_P0_hypo_dmr_11323|79|0.454|0.931	0	.
chr1	61397821	61398231	P0vsP39_P0_hypo_dmr_11328|14|0.181|0.825	0	.
chr1	61404601	61404685	P0vsP39_P0_hypo_dmr_11329|4|0.205|0.672	0	.
chr1	61405422	61405519	P0vsP39_P0_hypo_dmr_11330|4|0.149|0.639	0	.
chr1	61407222	61407869	P0vsP39_P0_hypo_dmr_11331|27|0.176|0.724	0	.
chr1	61408599	61408662	P0vsP39_P0_hypo_dmr_11332|4|0.144|0.874	0	.
chr1	61415051	61415694	P0vsP39_P0_hypo_dmr_11333|11|0.180|0.513	0	.
chr1	61419770	61419994	P0vsP39_P0_hypo_dmr_11335|12|0.482|0.902	0	.
chr1	61428368	61428503	P0vsP39_P0_hypo_dmr_11336|8|0.102|0.610	0	.
chr1	61429264	61429494	P0vsP39_P0_hypo_dmr_11337|6|0.241|0.784	0	.
chr1	61437874	61437990	P0vsP39_P0_hypo_dmr_11339|5|0.110|0.472	0	.
chr1	61529688	61530598	P0vsP39_P0_hypo_dmr_11346|18|0.405|0.773	0	.
chr1	61531456	61532106	P0vsP39_P0_hypo_dmr_11347|16|0.097|0.602	0	.
chr1	61539919	61540416	P0vsP39_P0_hypo_dmr_11348|4|0.335|0.643	0	.
chr1	61557263	61557271	P0vsP39_P0_hypo_dmr_11353|3|0.300|0.751	0	.
chr1	61608300	61608411	P0vsP39_P0_hypo_dmr_11357|4|0.389|0.787	0	.
chr1	61609071	61609149	P0vsP39_P0_hypo_dmr_11358|3|0.604|0.985	0	.
chr1	61654646	61654669	P0vsP39_P0_hypo_dmr_11362|3|0.464|0.901	0	.
chr1	61668419	61668496	P0vsP39_P0_hypo_dmr_11364|3|0.233|0.576	0	.
chr1	61685322	61685601	P0vsP39_P0_hypo_dmr_11365|14|0.083|0.673	0	.
chr1	61688508	61688560	P0vsP39_P0_hypo_dmr_11366|4|0.551|0.891	0	.
chr1	61691926	61692344	P0vsP39_P0_hypo_dmr_11367|13|0.308|0.786	0	.
chr1	61697377	61697778	P0vsP39_P0_hypo_dmr_11370|13|0.395|0.793	0	.
chr1	61729992	61730045	P0vsP39_P0_hypo_dmr_11378|4|0.316|0.800	0	.
chr1	61780051	61780130	P0vsP39_P0_hypo_dmr_11383|8|0.216|0.650	0	.
chr1	61782599	61783041	P0vsP39_P0_hypo_dmr_11384|4|0.479|0.809	0	.
chr1	61796344	61796587	P0vsP39_P0_hypo_dmr_11389|7|0.062|0.396	0	.
chr1	61822861	61823024	P0vsP39_P0_hypo_dmr_11393|5|0.239|0.655	0	.
chr1	61825771	61826510	P0vsP39_P0_hypo_dmr_11394|8|0.220|0.842	0	.
chr1	61836533	61837348	P0vsP39_P0_hypo_dmr_11395|15|0.367|0.708	0	.
chr1	61848609	61849216	P0vsP39_P0_hypo_dmr_11397|5|0.157|0.628	0	.
chr1	61850318	61850806	P0vsP39_P0_hypo_dmr_11398|11|0.258|0.833	0	.
chr1	61896235	61896318	P0vsP39_P0_hypo_dmr_11401|4|0.173|0.595	0	.
chr1	61901307	61901438	P0vsP39_P0_hypo_dmr_11402|7|0.394|0.799	0	.
chr1	61903871	61904189	P0vsP39_P0_hypo_dmr_11403|5|0.259|0.644	0	.
chr1	61912273	61913649	P0vsP39_P0_hypo_dmr_11405|21|0.135|0.759	0	.
chr1	61924075	61924236	P0vsP39_P0_hypo_dmr_11407|6|0.570|0.909	0	.
chr1	61928207	61928549	P0vsP39_P0_hypo_dmr_11408|8|0.173|0.499	0	.
chr1	61930505	61930646	P0vsP39_P0_hypo_dmr_11409|4|0.461|0.863	0	.
chr1	61965719	61965814	P0vsP39_P0_hypo_dmr_11414|5|0.333|0.818	0	.
chr1	61973156	61973589	P0vsP39_P0_hypo_dmr_11416|3|0.393|0.725	0	.
chr1	61982998	61983811	P0vsP39_P0_hypo_dmr_11418|7|0.473|0.782	0	.
chr1	61984330	61984720	P0vsP39_P0_hypo_dmr_11419|8|0.390|0.720	0	.
chr1	61995038	61995109	P0vsP39_P0_hypo_dmr_11421|3|0.279|0.873	0	.
chr1	61997489	61998304	P0vsP39_P0_hypo_dmr_11422|10|0.381|0.795	0	.
chr1	62000605	62000957	P0vsP39_P0_hypo_dmr_11424|5|0.499|0.823	0	.
chr1	62009020	62009339	P0vsP39_P0_hypo_dmr_11426|8|0.257|0.681	0	.
chr1	62010013	62010439	P0vsP39_P0_hypo_dmr_11427|17|0.199|0.708	0	.
chr1	62014889	62014950	P0vsP39_P0_hypo_dmr_11428|3|0.297|0.810	0	.
chr1	62016608	62018589	P0vsP39_P0_hypo_dmr_11429|24|0.195|0.631	0	.
chr1	62035529	62035653	P0vsP39_P0_hypo_dmr_11430|3|0.542|0.870	0	.
chr1	62048070	62048264	P0vsP39_P0_hypo_dmr_11432|4|0.261|0.623	0	.
chr1	62053100	62054180	P0vsP39_P0_hypo_dmr_11434|26|0.052|0.544	0	.
chr1	62064261	62064356	P0vsP39_P0_hypo_dmr_11436|6|0.500|0.863	0	.
chr1	62070711	62071335	P0vsP39_P0_hypo_dmr_11437|9|0.521|0.834	0	.
chr1	62084338	62084452	P0vsP39_P0_hypo_dmr_11438|5|0.413|0.835	0	.
chr1	62098441	62098641	P0vsP39_P0_hypo_dmr_11441|3|0.439|0.766	0	.
chr1	62132970	62133102	P0vsP39_P0_hypo_dmr_11447|6|0.526|0.893	0	.
chr1	62140050	62140338	P0vsP39_P0_hypo_dmr_11450|4|0.118|0.443	0	.
chr1	62156811	62157143	P0vsP39_P0_hypo_dmr_11455|9|0.314|0.755	0	.
chr1	62157777	62158283	P0vsP39_P0_hypo_dmr_11456|9|0.382|0.768	0	.
chr1	62181608	62182105	P0vsP39_P0_hypo_dmr_11460|14|0.170|0.818	0	.
chr1	62189246	62191077	P0vsP39_P0_hypo_dmr_11462|16|0.309|0.663	0	.
chr1	62209679	62209691	P0vsP39_P0_hypo_dmr_11464|4|0.350|0.840	0	.
chr1	62213442	62214049	P0vsP39_P0_hypo_dmr_11465|6|0.511|0.853	0	.
chr1	62214624	62215611	P0vsP39_P0_hypo_dmr_11466|29|0.167|0.707	0	.
chr1	62244013	62244859	P0vsP39_P0_hypo_dmr_11469|19|0.187|0.640	0	.
chr1	62254434	62255110	P0vsP39_P0_hypo_dmr_11471|10|0.078|0.768	0	.
chr1	62259974	62260125	P0vsP39_P0_hypo_dmr_11472|8|0.181|0.836	0	.
chr1	62261448	62261990	P0vsP39_P0_hypo_dmr_11473|6|0.153|0.664	0	.
chr1	62304179	62304349	P0vsP39_P0_hypo_dmr_11478|4|0.353|0.904	0	.
chr1	62325042	62326434	P0vsP39_P0_hypo_dmr_11480|33|0.188|0.773	0	.
chr1	62333110	62333185	P0vsP39_P0_hypo_dmr_11483|4|0.043|0.605	0	.
chr1	62334237	62334457	P0vsP39_P0_hypo_dmr_11484|5|0.335|0.847	0	.
chr1	62344002	62345158	P0vsP39_P0_hypo_dmr_11486|35|0.374|0.851	0	.
chr1	62348258	62348807	P0vsP39_P0_hypo_dmr_11487|9|0.226|0.538	0	.
chr1	62355051	62356378	P0vsP39_P0_hypo_dmr_11489|18|0.123|0.649	0	.
chr1	62371765	62371906	P0vsP39_P0_hypo_dmr_11492|10|0.187|0.835	0	.
chr1	62380375	62380483	P0vsP39_P0_hypo_dmr_11493|6|0.172|0.761	0	.
chr1	62382747	62383402	P0vsP39_P0_hypo_dmr_11495|24|0.379|0.921	0	.
chr1	62405153	62405331	P0vsP39_P0_hypo_dmr_11499|8|0.459|0.854	0	.
chr1	62411202	62412720	P0vsP39_P0_hypo_dmr_11501|21|0.448|0.845	0	.
chr1	62428820	62430192	P0vsP39_P0_hypo_dmr_11503|39|0.219|0.880	0	.
chr1	62431278	62431703	P0vsP39_P0_hypo_dmr_11504|10|0.241|0.733	0	.
chr1	62433657	62434022	P0vsP39_P0_hypo_dmr_11505|10|0.300|0.788	0	.
chr1	62435900	62436107	P0vsP39_P0_hypo_dmr_11506|10|0.443|0.928	0	.
chr1	62446150	62446393	P0vsP39_P0_hypo_dmr_11507|12|0.318|0.838	0	.
chr1	62447046	62447514	P0vsP39_P0_hypo_dmr_11508|7|0.353|0.740	0	.
chr1	62449508	62449962	P0vsP39_P0_hypo_dmr_11509|15|0.095|0.490	0	.
chr1	62489504	62489811	P0vsP39_P0_hypo_dmr_11514|9|0.270|0.655	0	.
chr1	62499097	62499402	P0vsP39_P0_hypo_dmr_11516|11|0.433|0.857	0	.
chr1	62503134	62503530	P0vsP39_P0_hypo_dmr_11518|13|0.179|0.746	0	.
chr1	62508114	62508333	P0vsP39_P0_hypo_dmr_11520|5|0.202|0.767	0	.
chr1	62512042	62512311	P0vsP39_P0_hypo_dmr_11521|6|0.349|0.726	0	.
chr1	62513226	62513317	P0vsP39_P0_hypo_dmr_11522|4|0.522|0.881	0	.
chr1	62518839	62518881	P0vsP39_P0_hypo_dmr_11524|3|0.287|0.822	0	.
chr1	62529789	62530267	P0vsP39_P0_hypo_dmr_11528|17|0.180|0.855	0	.
chr1	62549723	62549976	P0vsP39_P0_hypo_dmr_11531|3|0.487|0.824	0	.
chr1	62550702	62550741	P0vsP39_P0_hypo_dmr_11532|4|0.254|0.659	0	.
chr1	62564396	62566128	P0vsP39_P0_hypo_dmr_11538|39|0.073|0.518	0	.
chr1	62570610	62570850	P0vsP39_P0_hypo_dmr_11540|5|0.536|0.850	0	.
chr1	62582598	62583152	P0vsP39_P0_hypo_dmr_11543|12|0.083|0.505	0	.
chr1	62587445	62587970	P0vsP39_P0_hypo_dmr_11544|17|0.404|0.872	0	.
chr1	62589818	62590066	P0vsP39_P0_hypo_dmr_11545|9|0.439|0.949	0	.
chr1	62591058	62591707	P0vsP39_P0_hypo_dmr_11546|7|0.601|0.912	0	.
chr1	62597913	62598253	P0vsP39_P0_hypo_dmr_11549|7|0.287|0.747	0	.
chr1	62616532	62616655	P0vsP39_P0_hypo_dmr_11552|6|0.612|0.969	0	.
chr1	62631664	62632191	P0vsP39_P0_hypo_dmr_11554|11|0.624|0.929	0	.
chr1	62636445	62636816	P0vsP39_P0_hypo_dmr_11555|14|0.434|0.864	0	.
chr1	62647976	62648858	P0vsP39_P0_hypo_dmr_11559|28|0.291|0.810	0	.
chr1	62660826	62660862	P0vsP39_P0_hypo_dmr_11562|4|0.495|0.920	0	.
chr1	62679280	62679401	P0vsP39_P0_hypo_dmr_11564|5|0.499|0.860	0	.
chr1	62681583	62681587	P0vsP39_P0_hypo_dmr_11566|3|0.484|0.924	0	.
chr1	62698489	62698552	P0vsP39_P0_hypo_dmr_11572|3|0.248|0.869	0	.
chr1	62699985	62700193	P0vsP39_P0_hypo_dmr_11573|5|0.291|0.712	0	.
chr1	62708518	62708541	P0vsP39_P0_hypo_dmr_11575|6|0.051|0.476	0	.
chr1	62710076	62710173	P0vsP39_P0_hypo_dmr_11576|3|0.439|0.769	0	.
[truncated: 111,558 more rows]

## Sheet: Devlopmental DMRs, P0 > P39
chrom	start	end	name (id|num_DMS|mCG_P0_Control|mCG_P39_Control)	score	strand
chr1	3118935	3119397	P0vsP39_P39_hypo_dmr_15|6|0.551|0.157	0	.
chr1	3175597	3175689	P0vsP39_P39_hypo_dmr_19|4|0.947|0.489	0	.
chr1	3204861	3205342	P0vsP39_P39_hypo_dmr_23|5|0.930|0.480	0	.
chr1	3221208	3221595	P0vsP39_P39_hypo_dmr_27|3|0.835|0.533	0	.
chr1	3226268	3226606	P0vsP39_P39_hypo_dmr_28|3|0.860|0.500	0	.
chr1	3227997	3228141	P0vsP39_P39_hypo_dmr_29|3|0.945|0.552	0	.
chr1	3263225	3263427	P0vsP39_P39_hypo_dmr_34|5|0.959|0.658	0	.
chr1	3265226	3265694	P0vsP39_P39_hypo_dmr_35|6|0.853|0.188	0	.
chr1	3269582	3269886	P0vsP39_P39_hypo_dmr_36|5|0.901|0.541	0	.
chr1	3279428	3279808	P0vsP39_P39_hypo_dmr_39|3|0.948|0.623	0	.
chr1	3282057	3282191	P0vsP39_P39_hypo_dmr_40|4|0.967|0.650	0	.
chr1	3283261	3283305	P0vsP39_P39_hypo_dmr_41|3|0.929|0.563	0	.
chr1	3293050	3293394	P0vsP39_P39_hypo_dmr_42|4|0.610|0.235	0	.
chr1	3299622	3300284	P0vsP39_P39_hypo_dmr_43|9|0.506|0.130	0	.
chr1	3301775	3301786	P0vsP39_P39_hypo_dmr_44|4|0.955|0.646	0	.
chr1	3309554	3310305	P0vsP39_P39_hypo_dmr_45|10|0.651|0.167	0	.
chr1	3322142	3322584	P0vsP39_P39_hypo_dmr_48|8|0.758|0.283	0	.
chr1	3324585	3324902	P0vsP39_P39_hypo_dmr_49|4|0.771|0.374	0	.
chr1	3327525	3327721	P0vsP39_P39_hypo_dmr_50|4|0.915|0.429	0	.
chr1	3328696	3328753	P0vsP39_P39_hypo_dmr_51|4|0.899|0.484	0	.
chr1	3330224	3330432	P0vsP39_P39_hypo_dmr_52|4|0.926|0.115	0	.
chr1	3332264	3332515	P0vsP39_P39_hypo_dmr_53|4|0.904|0.436	0	.
chr1	3360461	3361197	P0vsP39_P39_hypo_dmr_54|13|0.818|0.340	0	.
chr1	3361763	3361953	P0vsP39_P39_hypo_dmr_55|3|0.800|0.482	0	.
chr1	3366922	3367136	P0vsP39_P39_hypo_dmr_56|6|0.920|0.465	0	.
chr1	3370758	3371204	P0vsP39_P39_hypo_dmr_60|5|0.891|0.467	0	.
chr1	3371841	3371973	P0vsP39_P39_hypo_dmr_61|3|0.730|0.393	0	.
chr1	3376162	3376674	P0vsP39_P39_hypo_dmr_62|4|0.938|0.558	0	.
chr1	3381362	3382320	P0vsP39_P39_hypo_dmr_64|9|0.863|0.481	0	.
chr1	3385587	3386097	P0vsP39_P39_hypo_dmr_65|9|0.755|0.309	0	.
chr1	3387402	3387473	P0vsP39_P39_hypo_dmr_66|4|0.912|0.337	0	.
chr1	3388335	3388676	P0vsP39_P39_hypo_dmr_67|4|0.563|0.055	0	.
chr1	3389194	3389870	P0vsP39_P39_hypo_dmr_68|6|0.878|0.530	0	.
chr1	3390821	3391605	P0vsP39_P39_hypo_dmr_69|14|0.941|0.626	0	.
chr1	3392219	3392697	P0vsP39_P39_hypo_dmr_70|4|0.885|0.434	0	.
chr1	3395423	3395567	P0vsP39_P39_hypo_dmr_72|3|0.644|0.285	0	.
chr1	3397791	3398297	P0vsP39_P39_hypo_dmr_73|6|0.748|0.283	0	.
chr1	3399108	3399187	P0vsP39_P39_hypo_dmr_74|8|0.605|0.090	0	.
chr1	3402460	3402509	P0vsP39_P39_hypo_dmr_76|4|0.938|0.495	0	.
chr1	3405456	3405576	P0vsP39_P39_hypo_dmr_77|3|0.941|0.558	0	.
chr1	3406395	3406711	P0vsP39_P39_hypo_dmr_78|4|0.707|0.276	0	.
chr1	3410878	3411164	P0vsP39_P39_hypo_dmr_79|6|0.730|0.302	0	.
chr1	3426898	3427385	P0vsP39_P39_hypo_dmr_82|3|0.952|0.641	0	.
chr1	3433025	3433950	P0vsP39_P39_hypo_dmr_83|11|0.778|0.264	0	.
chr1	3435529	3435795	P0vsP39_P39_hypo_dmr_84|3|0.902|0.571	0	.
chr1	3451075	3451241	P0vsP39_P39_hypo_dmr_86|3|0.984|0.659	0	.
chr1	3451488	3452112	P0vsP39_P39_hypo_dmr_87|5|0.879|0.571	0	.
chr1	3455019	3455808	P0vsP39_P39_hypo_dmr_88|6|0.868|0.519	0	.
chr1	3457007	3457493	P0vsP39_P39_hypo_dmr_89|9|0.928|0.554	0	.
chr1	3458809	3458923	P0vsP39_P39_hypo_dmr_90|3|0.918|0.592	0	.
chr1	3476819	3477312	P0vsP39_P39_hypo_dmr_93|5|0.814|0.465	0	.
chr1	3489939	3490438	P0vsP39_P39_hypo_dmr_97|6|0.962|0.651	0	.
chr1	3493036	3493590	P0vsP39_P39_hypo_dmr_98|7|0.723|0.397	0	.
chr1	3494295	3494708	P0vsP39_P39_hypo_dmr_99|7|0.726|0.381	0	.
chr1	3506777	3507162	P0vsP39_P39_hypo_dmr_102|4|0.880|0.280	0	.
chr1	3510988	3511412	P0vsP39_P39_hypo_dmr_103|5|0.895|0.552	0	.
chr1	3529255	3529414	P0vsP39_P39_hypo_dmr_105|5|0.891|0.445	0	.
chr1	3544150	3544282	P0vsP39_P39_hypo_dmr_108|3|0.913|0.574	0	.
chr1	3553509	3553815	P0vsP39_P39_hypo_dmr_111|3|0.867|0.491	0	.
chr1	3559617	3559741	P0vsP39_P39_hypo_dmr_114|3|0.960|0.612	0	.
chr1	3561743	3561913	P0vsP39_P39_hypo_dmr_115|3|0.956|0.614	0	.
chr1	3564399	3564802	P0vsP39_P39_hypo_dmr_116|3|0.936|0.594	0	.
chr1	3567847	3568493	P0vsP39_P39_hypo_dmr_118|5|0.929|0.607	0	.
chr1	3579904	3580292	P0vsP39_P39_hypo_dmr_121|5|0.891|0.468	0	.
chr1	3586310	3587536	P0vsP39_P39_hypo_dmr_123|9|0.893|0.571	0	.
chr1	3593504	3594412	P0vsP39_P39_hypo_dmr_124|6|0.937|0.534	0	.
chr1	3601565	3602124	P0vsP39_P39_hypo_dmr_127|6|0.949|0.433	0	.
chr1	3611264	3611437	P0vsP39_P39_hypo_dmr_129|4|0.858|0.499	0	.
chr1	3612223	3612339	P0vsP39_P39_hypo_dmr_130|3|0.964|0.587	0	.
chr1	3632663	3633011	P0vsP39_P39_hypo_dmr_134|6|0.835|0.358	0	.
chr1	3639092	3639129	P0vsP39_P39_hypo_dmr_137|6|0.887|0.041	0	.
chr1	3643455	3643654	P0vsP39_P39_hypo_dmr_139|4|0.510|0.181	0	.
chr1	3650975	3651509	P0vsP39_P39_hypo_dmr_140|8|0.692|0.250	0	.
chr1	3665565	3665703	P0vsP39_P39_hypo_dmr_142|3|0.909|0.533	0	.
chr1	3668112	3669309	P0vsP39_P39_hypo_dmr_143|16|0.681|0.110	0	.
chr1	3670043	3670279	P0vsP39_P39_hypo_dmr_144|4|0.550|0.028	0	.
chr1	3685583	3686008	P0vsP39_P39_hypo_dmr_147|3|0.923|0.482	0	.
chr1	3741968	3742190	P0vsP39_P39_hypo_dmr_152|5|0.817|0.409	0	.
chr1	3902576	3903367	P0vsP39_P39_hypo_dmr_160|5|0.777|0.456	0	.
chr1	3904280	3904691	P0vsP39_P39_hypo_dmr_161|3|0.952|0.517	0	.
chr1	3909044	3909303	P0vsP39_P39_hypo_dmr_162|5|0.889|0.547	0	.
chr1	3932640	3933114	P0vsP39_P39_hypo_dmr_163|6|0.818|0.239	0	.
chr1	3943202	3943437	P0vsP39_P39_hypo_dmr_164|3|0.843|0.530	0	.
chr1	3972137	3972492	P0vsP39_P39_hypo_dmr_165|4|0.923|0.511	0	.
chr1	3989965	3990398	P0vsP39_P39_hypo_dmr_167|10|0.939|0.524	0	.
chr1	4032239	4032528	P0vsP39_P39_hypo_dmr_171|3|0.827|0.507	0	.
chr1	4034927	4035005	P0vsP39_P39_hypo_dmr_172|4|0.773|0.225	0	.
chr1	4077667	4077905	P0vsP39_P39_hypo_dmr_175|5|0.845|0.439	0	.
chr1	4089433	4089532	P0vsP39_P39_hypo_dmr_176|3|0.915|0.615	0	.
chr1	4090081	4090394	P0vsP39_P39_hypo_dmr_177|7|0.933|0.628	0	.
chr1	4094378	4094644	P0vsP39_P39_hypo_dmr_178|6|0.821|0.401	0	.
chr1	4098019	4098209	P0vsP39_P39_hypo_dmr_179|6|0.868|0.393	0	.
chr1	4186538	4187724	P0vsP39_P39_hypo_dmr_190|16|0.914|0.409	0	.
chr1	4260665	4260998	P0vsP39_P39_hypo_dmr_198|3|0.921|0.562	0	.
chr1	4362399	4362600	P0vsP39_P39_hypo_dmr_206|3|0.878|0.498	0	.
chr1	4414508	4415171	P0vsP39_P39_hypo_dmr_213|10|0.746|0.298	0	.
chr1	4469237	4469668	P0vsP39_P39_hypo_dmr_220|8|0.903|0.593	0	.
chr1	4471127	4471240	P0vsP39_P39_hypo_dmr_221|3|0.794|0.308	0	.
chr1	4692084	4692314	P0vsP39_P39_hypo_dmr_245|3|0.943|0.530	0	.
chr1	4696163	4696842	P0vsP39_P39_hypo_dmr_246|6|0.957|0.627	0	.
chr1	4703240	4703811	P0vsP39_P39_hypo_dmr_247|12|0.925|0.425	0	.
chr1	4747578	4747897	P0vsP39_P39_hypo_dmr_253|3|0.960|0.434	0	.
chr1	4784791	4784869	P0vsP39_P39_hypo_dmr_259|4|0.537|0.160	0	.
chr1	4799608	4800066	P0vsP39_P39_hypo_dmr_261|4|0.766|0.379	0	.
chr1	4818339	4818544	P0vsP39_P39_hypo_dmr_264|7|0.734|0.415	0	.
chr1	4851252	4851450	P0vsP39_P39_hypo_dmr_273|4|0.972|0.633	0	.
chr1	4860525	4860815	P0vsP39_P39_hypo_dmr_275|5|0.921|0.597	0	.
chr1	4871378	4871539	P0vsP39_P39_hypo_dmr_279|3|0.962|0.629	0	.
chr1	4873143	4873502	P0vsP39_P39_hypo_dmr_280|3|0.884|0.365	0	.
chr1	4881057	4882001	P0vsP39_P39_hypo_dmr_282|9|0.941|0.583	0	.
chr1	4891248	4891488	P0vsP39_P39_hypo_dmr_287|7|0.927|0.614	0	.
chr1	4917014	4917149	P0vsP39_P39_hypo_dmr_293|3|0.833|0.418	0	.
chr1	4925841	4926816	P0vsP39_P39_hypo_dmr_294|13|0.793|0.465	0	.
chr1	4952706	4952886	P0vsP39_P39_hypo_dmr_299|3|0.951|0.244	0	.
chr1	4984418	4984913	P0vsP39_P39_hypo_dmr_304|3|0.984|0.637	0	.
chr1	4990260	4990548	P0vsP39_P39_hypo_dmr_307|4|0.938|0.583	0	.
chr1	4992393	4992850	P0vsP39_P39_hypo_dmr_308|5|0.949|0.570	0	.
chr1	5065090	5065242	P0vsP39_P39_hypo_dmr_320|5|0.854|0.532	0	.
chr1	5071091	5072006	P0vsP39_P39_hypo_dmr_321|10|0.905|0.588	0	.
chr1	5084044	5085042	P0vsP39_P39_hypo_dmr_322|14|0.880|0.440	0	.
chr1	5085862	5086067	P0vsP39_P39_hypo_dmr_323|3|0.950|0.554	0	.
chr1	5087281	5087310	P0vsP39_P39_hypo_dmr_324|4|0.926|0.348	0	.
chr1	5088048	5088232	P0vsP39_P39_hypo_dmr_325|3|0.989|0.622	0	.
chr1	5094578	5094994	P0vsP39_P39_hypo_dmr_328|3|0.887|0.527	0	.
chr1	5099130	5100133	P0vsP39_P39_hypo_dmr_330|12|0.920|0.551	0	.
chr1	5102464	5103941	P0vsP39_P39_hypo_dmr_332|16|0.856|0.499	0	.
chr1	5106757	5107394	P0vsP39_P39_hypo_dmr_335|6|0.954|0.445	0	.
chr1	5122548	5122700	P0vsP39_P39_hypo_dmr_339|3|0.953|0.620	0	.
chr1	5126175	5127595	P0vsP39_P39_hypo_dmr_340|7|0.944|0.561	0	.
chr1	5128433	5128678	P0vsP39_P39_hypo_dmr_341|3|0.936|0.633	0	.
chr1	5129811	5131602	P0vsP39_P39_hypo_dmr_342|24|0.905|0.382	0	.
chr1	5132933	5133118	P0vsP39_P39_hypo_dmr_343|6|0.852|0.479	0	.
chr1	5139547	5139950	P0vsP39_P39_hypo_dmr_346|4|0.932|0.632	0	.
chr1	5146021	5147272	P0vsP39_P39_hypo_dmr_350|11|0.882|0.510	0	.
chr1	5147894	5148153	P0vsP39_P39_hypo_dmr_351|6|0.939|0.503	0	.
chr1	5155071	5156142	P0vsP39_P39_hypo_dmr_354|7|0.967|0.556	0	.
chr1	5157034	5157254	P0vsP39_P39_hypo_dmr_355|4|0.947|0.510	0	.
chr1	5162638	5163412	P0vsP39_P39_hypo_dmr_356|4|0.947|0.604	0	.
chr1	5164064	5164234	P0vsP39_P39_hypo_dmr_357|3|0.954|0.544	0	.
chr1	5177065	5177659	P0vsP39_P39_hypo_dmr_362|7|0.778|0.198	0	.
chr1	5179146	5179442	P0vsP39_P39_hypo_dmr_363|3|0.946|0.594	0	.
chr1	5221039	5221091	P0vsP39_P39_hypo_dmr_365|6|0.776|0.285	0	.
chr1	5230959	5231259	P0vsP39_P39_hypo_dmr_368|6|0.963|0.585	0	.
chr1	5243284	5243288	P0vsP39_P39_hypo_dmr_370|3|0.908|0.525	0	.
chr1	5249086	5250083	P0vsP39_P39_hypo_dmr_372|6|0.893|0.394	0	.
chr1	5260253	5260308	P0vsP39_P39_hypo_dmr_373|4|0.901|0.345	0	.
chr1	5285323	5285462	P0vsP39_P39_hypo_dmr_377|6|0.863|0.444	0	.
chr1	5288127	5288302	P0vsP39_P39_hypo_dmr_378|5|0.784|0.275	0	.
chr1	5307504	5307546	P0vsP39_P39_hypo_dmr_382|3|0.862|0.533	0	.
chr1	5311811	5311990	P0vsP39_P39_hypo_dmr_383|3|0.891|0.578	0	.
chr1	5315878	5316094	P0vsP39_P39_hypo_dmr_384|4|0.524|0.054	0	.
chr1	5316620	5316831	P0vsP39_P39_hypo_dmr_385|4|0.825|0.247	0	.
chr1	5317528	5317846	P0vsP39_P39_hypo_dmr_386|3|0.902|0.593	0	.
chr1	5334312	5335118	P0vsP39_P39_hypo_dmr_387|11|0.915|0.491	0	.
chr1	5335708	5335777	P0vsP39_P39_hypo_dmr_388|4|0.811|0.213	0	.
chr1	5336382	5337126	P0vsP39_P39_hypo_dmr_389|10|0.828|0.505	0	.
chr1	5372441	5372461	P0vsP39_P39_hypo_dmr_391|3|0.938|0.604	0	.
chr1	5378974	5379524	P0vsP39_P39_hypo_dmr_392|6|0.484|0.167	0	.
chr1	5382202	5382953	P0vsP39_P39_hypo_dmr_394|8|0.741|0.213	0	.
chr1	5394441	5395568	P0vsP39_P39_hypo_dmr_395|10|0.838|0.520	0	.
chr1	5471751	5472488	P0vsP39_P39_hypo_dmr_397|3|0.941|0.621	0	.
chr1	5733349	5733941	P0vsP39_P39_hypo_dmr_409|3|0.649|0.254	0	.
chr1	5795254	5795327	P0vsP39_P39_hypo_dmr_414|4|0.925|0.473	0	.
chr1	5841580	5841804	P0vsP39_P39_hypo_dmr_416|3|0.986|0.684	0	.
chr1	5849385	5849677	P0vsP39_P39_hypo_dmr_417|3|0.965|0.651	0	.
chr1	5926068	5926324	P0vsP39_P39_hypo_dmr_419|4|0.848|0.324	0	.
chr1	5933258	5933456	P0vsP39_P39_hypo_dmr_420|3|0.941|0.553	0	.
chr1	5945948	5946251	P0vsP39_P39_hypo_dmr_421|3|0.882|0.542	0	.
chr1	5954919	5956204	P0vsP39_P39_hypo_dmr_423|25|0.841|0.438	0	.
chr1	6013362	6013517	P0vsP39_P39_hypo_dmr_426|3|0.956|0.627	0	.
chr1	6048902	6049235	P0vsP39_P39_hypo_dmr_428|4|0.858|0.526	0	.
chr1	6093932	6095327	P0vsP39_P39_hypo_dmr_432|9|0.833|0.517	0	.
chr1	6116951	6117203	P0vsP39_P39_hypo_dmr_433|3|0.934|0.599	0	.
chr1	6190047	6190332	P0vsP39_P39_hypo_dmr_439|3|0.840|0.519	0	.
chr1	6209437	6209551	P0vsP39_P39_hypo_dmr_443|3|0.838|0.455	0	.
chr1	6212308	6213340	P0vsP39_P39_hypo_dmr_445|13|0.866|0.466	0	.
chr1	6215587	6216038	P0vsP39_P39_hypo_dmr_446|12|0.496|0.147	0	.
chr1	6218301	6221350	P0vsP39_P39_hypo_dmr_448|24|0.867|0.532	0	.
chr1	6223530	6226257	P0vsP39_P39_hypo_dmr_449|29|0.850|0.459	0	.
chr1	6233033	6235489	P0vsP39_P39_hypo_dmr_453|21|0.929|0.573	0	.
chr1	6247717	6247821	P0vsP39_P39_hypo_dmr_458|3|0.912|0.577	0	.
chr1	6254594	6254740	P0vsP39_P39_hypo_dmr_461|3|0.983|0.645	0	.
chr1	6266986	6268290	P0vsP39_P39_hypo_dmr_465|7|0.934|0.633	0	.
chr1	6271732	6272147	P0vsP39_P39_hypo_dmr_466|4|0.931|0.599	0	.
chr1	6286065	6286223	P0vsP39_P39_hypo_dmr_471|4|0.922|0.570	0	.
chr1	6314849	6314885	P0vsP39_P39_hypo_dmr_474|3|0.932|0.555	0	.
chr1	6364008	6364468	P0vsP39_P39_hypo_dmr_479|5|0.885|0.507	0	.
chr1	6482844	6483171	P0vsP39_P39_hypo_dmr_490|4|0.604|0.108	0	.
chr1	6488843	6489152	P0vsP39_P39_hypo_dmr_492|5|0.895|0.495	0	.
chr1	6499595	6499889	P0vsP39_P39_hypo_dmr_494|7|0.823|0.317	0	.
chr1	6677873	6678432	P0vsP39_P39_hypo_dmr_509|6|0.786|0.426	0	.
chr1	6804717	6804919	P0vsP39_P39_hypo_dmr_528|3|0.918|0.609	0	.
chr1	6810535	6810850	P0vsP39_P39_hypo_dmr_531|5|0.634|0.242	0	.
chr1	6862348	6862585	P0vsP39_P39_hypo_dmr_535|3|0.880|0.492	0	.
chr1	6906127	6906650	P0vsP39_P39_hypo_dmr_539|5|0.849|0.507	0	.
chr1	6907971	6908101	P0vsP39_P39_hypo_dmr_540|7|0.811|0.444	0	.
chr1	7035701	7035712	P0vsP39_P39_hypo_dmr_550|4|0.870|0.312	0	.
chr1	7086707	7087618	P0vsP39_P39_hypo_dmr_556|8|0.912|0.497	0	.
chr1	7089981	7091485	P0vsP39_P39_hypo_dmr_557|11|0.622|0.319	0	.
chr1	7104081	7104838	P0vsP39_P39_hypo_dmr_564|13|0.923|0.542	0	.
chr1	7105393	7106233	P0vsP39_P39_hypo_dmr_565|11|0.806|0.455	0	.
chr1	7117684	7118557	P0vsP39_P39_hypo_dmr_569|13|0.934|0.617	0	.
chr1	7131425	7133036	P0vsP39_P39_hypo_dmr_571|17|0.785|0.415	0	.
chr1	7138427	7138607	P0vsP39_P39_hypo_dmr_573|5|0.853|0.399	0	.
chr1	7154777	7154902	P0vsP39_P39_hypo_dmr_577|4|0.927|0.587	0	.
chr1	7155286	7155759	P0vsP39_P39_hypo_dmr_578|10|0.794|0.167	0	.
chr1	7170240	7171387	P0vsP39_P39_hypo_dmr_582|12|0.937|0.489	0	.
chr1	7219207	7219892	P0vsP39_P39_hypo_dmr_589|10|0.797|0.312	0	.
chr1	7249786	7250155	P0vsP39_P39_hypo_dmr_593|3|0.959|0.608	0	.
chr1	7347835	7348229	P0vsP39_P39_hypo_dmr_604|10|0.905|0.260	0	.
chr1	7351464	7351601	P0vsP39_P39_hypo_dmr_605|3|0.978|0.669	0	.
chr1	7447986	7448068	P0vsP39_P39_hypo_dmr_611|5|0.924|0.548	0	.
chr1	7497991	7498407	P0vsP39_P39_hypo_dmr_614|8|0.914|0.468	0	.
chr1	7526274	7526401	P0vsP39_P39_hypo_dmr_616|4|0.894|0.584	0	.
chr1	7534067	7534433	P0vsP39_P39_hypo_dmr_617|5|0.930|0.605	0	.
chr1	7535079	7535183	P0vsP39_P39_hypo_dmr_618|6|0.715|0.187	0	.
chr1	7549051	7550055	P0vsP39_P39_hypo_dmr_620|8|0.815|0.441	0	.
chr1	7641456	7642173	P0vsP39_P39_hypo_dmr_632|6|0.860|0.558	0	.
chr1	7696294	7696548	P0vsP39_P39_hypo_dmr_637|5|0.908|0.557	0	.
chr1	7725912	7726360	P0vsP39_P39_hypo_dmr_638|3|0.800|0.494	0	.
chr1	7768866	7769296	P0vsP39_P39_hypo_dmr_643|7|0.883|0.309	0	.
chr1	7809261	7809448	P0vsP39_P39_hypo_dmr_649|3|0.961|0.659	0	.
chr1	7819037	7819402	P0vsP39_P39_hypo_dmr_651|4|0.928|0.562	0	.
chr1	7829894	7830165	P0vsP39_P39_hypo_dmr_654|3|0.940|0.584	0	.
chr1	7863886	7864023	P0vsP39_P39_hypo_dmr_656|4|0.833|0.343	0	.
chr1	7940768	7941063	P0vsP39_P39_hypo_dmr_664|7|0.928|0.532	0	.
chr1	8006538	8006680	P0vsP39_P39_hypo_dmr_670|4|0.729|0.336	0	.
chr1	8026114	8026168	P0vsP39_P39_hypo_dmr_673|4|0.830|0.478	0	.
chr1	8065266	8065915	P0vsP39_P39_hypo_dmr_675|11|0.891|0.392	0	.
chr1	8069843	8070318	P0vsP39_P39_hypo_dmr_677|3|0.955|0.535	0	.
chr1	8099786	8100161	P0vsP39_P39_hypo_dmr_679|3|0.945|0.393	0	.
chr1	8135119	8135284	P0vsP39_P39_hypo_dmr_684|3|0.842|0.186	0	.
chr1	8267554	8267795	P0vsP39_P39_hypo_dmr_693|3|0.910|0.573	0	.
chr1	8386336	8386704	P0vsP39_P39_hypo_dmr_700|4|0.907|0.547	0	.
chr1	8560793	8560801	P0vsP39_P39_hypo_dmr_712|3|0.958|0.645	0	.
chr1	8584439	8584489	P0vsP39_P39_hypo_dmr_717|4|0.845|0.250	0	.
chr1	8587418	8587528	P0vsP39_P39_hypo_dmr_718|3|0.826|0.290	0	.
chr1	8604722	8604947	P0vsP39_P39_hypo_dmr_721|3|0.865|0.536	0	.
chr1	8678947	8679309	P0vsP39_P39_hypo_dmr_728|8|0.680|0.332	0	.
chr1	8725132	8725490	P0vsP39_P39_hypo_dmr_731|3|0.722|0.266	0	.
chr1	8772606	8773044	P0vsP39_P39_hypo_dmr_734|6|0.926|0.547	0	.
chr1	8783369	8783750	P0vsP39_P39_hypo_dmr_736|4|0.911|0.604	0	.
chr1	8791254	8791819	P0vsP39_P39_hypo_dmr_739|5|0.941|0.565	0	.
chr1	8818313	8818410	P0vsP39_P39_hypo_dmr_740|3|0.835|0.522	0	.
chr1	8821734	8822389	P0vsP39_P39_hypo_dmr_741|5|0.864|0.460	0	.
chr1	8823059	8823326	P0vsP39_P39_hypo_dmr_742|4|0.734|0.219	0	.
chr1	8842936	8843268	P0vsP39_P39_hypo_dmr_743|5|0.749|0.293	0	.
chr1	8867596	8867813	P0vsP39_P39_hypo_dmr_746|5|0.862|0.375	0	.
chr1	8889860	8890060	P0vsP39_P39_hypo_dmr_747|3|0.952|0.637	0	.
chr1	8909003	8909039	P0vsP39_P39_hypo_dmr_750|4|0.883|0.416	0	.
chr1	8922015	8922349	P0vsP39_P39_hypo_dmr_754|5|0.877|0.489	0	.
chr1	8933891	8934164	P0vsP39_P39_hypo_dmr_756|3|0.777|0.359	0	.
chr1	8944946	8945369	P0vsP39_P39_hypo_dmr_759|4|0.781|0.308	0	.
chr1	8961062	8961149	P0vsP39_P39_hypo_dmr_762|3|0.772|0.286	0	.
chr1	8998674	8999670	P0vsP39_P39_hypo_dmr_765|14|0.919|0.475	0	.
chr1	9044026	9044206	P0vsP39_P39_hypo_dmr_772|3|0.910|0.593	0	.
chr1	9073276	9074235	P0vsP39_P39_hypo_dmr_773|8|0.886|0.500	0	.
chr1	9090921	9091138	P0vsP39_P39_hypo_dmr_777|4|0.890|0.216	0	.
chr1	9125437	9125471	P0vsP39_P39_hypo_dmr_779|3|0.889|0.389	0	.
chr1	9126066	9126298	P0vsP39_P39_hypo_dmr_780|3|0.894|0.340	0	.
chr1	9127367	9127846	P0vsP39_P39_hypo_dmr_781|11|0.801|0.252	0	.
chr1	9172032	9172622	P0vsP39_P39_hypo_dmr_787|8|0.680|0.146	0	.
chr1	9175397	9175410	P0vsP39_P39_hypo_dmr_788|3|0.973|0.610	0	.
chr1	9202949	9203661	P0vsP39_P39_hypo_dmr_791|5|0.872|0.514	0	.
chr1	9253942	9254238	P0vsP39_P39_hypo_dmr_796|7|0.789|0.350	0	.
chr1	9279209	9279658	P0vsP39_P39_hypo_dmr_799|5|0.822|0.373	0	.
chr1	9296265	9298353	P0vsP39_P39_hypo_dmr_804|27|0.549|0.162	0	.
chr1	9315766	9316073	P0vsP39_P39_hypo_dmr_805|4|0.909|0.524	0	.
chr1	9340570	9340809	P0vsP39_P39_hypo_dmr_806|3|0.693|0.302	0	.
chr1	9367864	9368101	P0vsP39_P39_hypo_dmr_807|7|0.860|0.455	0	.
chr1	9383907	9383912	P0vsP39_P39_hypo_dmr_810|3|0.903|0.594	0	.
chr1	9570217	9570890	P0vsP39_P39_hypo_dmr_833|5|0.573|0.251	0	.
chr1	9577282	9578208	P0vsP39_P39_hypo_dmr_836|12|0.875|0.379	0	.
chr1	9591626	9592227	P0vsP39_P39_hypo_dmr_839|11|0.822|0.134	0	.
chr1	9600894	9601069	P0vsP39_P39_hypo_dmr_841|5|0.789|0.174	0	.
chr1	9601704	9605125	P0vsP39_P39_hypo_dmr_842|32|0.580|0.246	0	.
chr1	9606631	9606902	P0vsP39_P39_hypo_dmr_843|3|0.856|0.270	0	.
chr1	9608531	9611092	P0vsP39_P39_hypo_dmr_844|27|0.846|0.504	0	.
chr1	9614159	9614376	P0vsP39_P39_hypo_dmr_846|4|0.894|0.441	0	.
chr1	9615273	9616208	P0vsP39_P39_hypo_dmr_847|12|0.880|0.263	0	.
chr1	9620993	9621365	P0vsP39_P39_hypo_dmr_851|3|0.969|0.595	0	.
chr1	9626722	9627382	P0vsP39_P39_hypo_dmr_854|11|0.719|0.246	0	.
chr1	9628043	9628680	P0vsP39_P39_hypo_dmr_855|10|0.720|0.217	0	.
chr1	9631090	9631174	P0vsP39_P39_hypo_dmr_857|6|0.845|0.244	0	.
chr1	9644883	9645986	P0vsP39_P39_hypo_dmr_860|11|0.902|0.559	0	.
chr1	9672426	9672899	P0vsP39_P39_hypo_dmr_867|10|0.918|0.610	0	.
chr1	9673477	9673489	P0vsP39_P39_hypo_dmr_868|4|0.917|0.134	0	.
chr1	9674114	9674696	P0vsP39_P39_hypo_dmr_869|6|0.938|0.612	0	.
chr1	9701355	9701362	P0vsP39_P39_hypo_dmr_874|4|0.606|0.196	0	.
chr1	9714874	9715183	P0vsP39_P39_hypo_dmr_877|3|0.830|0.375	0	.
chr1	9717582	9718574	P0vsP39_P39_hypo_dmr_878|6|0.811|0.442	0	.
chr1	9732795	9734051	P0vsP39_P39_hypo_dmr_883|8|0.954|0.556	0	.
chr1	9740885	9742213	P0vsP39_P39_hypo_dmr_886|10|0.906|0.580	0	.
chr1	9743224	9744764	P0vsP39_P39_hypo_dmr_887|16|0.813|0.467	0	.
chr1	9745706	9747281	P0vsP39_P39_hypo_dmr_888|18|0.767|0.413	0	.
chr1	9753388	9753719	P0vsP39_P39_hypo_dmr_889|3|0.928|0.627	0	.
chr1	9773202	9773981	P0vsP39_P39_hypo_dmr_893|13|0.810|0.393	0	.
chr1	9784217	9784351	P0vsP39_P39_hypo_dmr_898|5|0.784|0.090	0	.
chr1	9790838	9790844	P0vsP39_P39_hypo_dmr_901|4|0.909|0.372	0	.
chr1	9793336	9793356	P0vsP39_P39_hypo_dmr_902|4|0.912|0.178	0	.
chr1	9796690	9797275	P0vsP39_P39_hypo_dmr_903|10|0.693|0.356	0	.
chr1	9803909	9804903	P0vsP39_P39_hypo_dmr_905|14|0.776|0.403	0	.
chr1	9811590	9811972	P0vsP39_P39_hypo_dmr_908|7|0.892|0.487	0	.
chr1	9823426	9825264	P0vsP39_P39_hypo_dmr_912|29|0.714|0.266	0	.
chr1	9838836	9839091	P0vsP39_P39_hypo_dmr_915|4|0.845|0.526	0	.
chr1	9862531	9863144	P0vsP39_P39_hypo_dmr_923|10|0.838|0.514	0	.
chr1	9888402	9888496	P0vsP39_P39_hypo_dmr_935|3|0.963|0.539	0	.
chr1	9903223	9903635	P0vsP39_P39_hypo_dmr_937|3|0.903|0.597	0	.
chr1	9931655	9932399	P0vsP39_P39_hypo_dmr_945|7|0.862|0.549	0	.
chr1	9932950	9934005	P0vsP39_P39_hypo_dmr_946|7|0.918|0.398	0	.
chr1	9939834	9940106	P0vsP39_P39_hypo_dmr_949|4|0.895|0.547	0	.
chr1	9982069	9982238	P0vsP39_P39_hypo_dmr_958|3|0.912|0.555	0	.
chr1	9993544	9994400	P0vsP39_P39_hypo_dmr_961|11|0.808|0.162	0	.
chr1	9994948	9995130	P0vsP39_P39_hypo_dmr_962|4|0.981|0.563	0	.
chr1	9996139	9997195	P0vsP39_P39_hypo_dmr_963|17|0.891|0.505	0	.
chr1	9998816	9998835	P0vsP39_P39_hypo_dmr_964|4|0.889|0.479	0	.
chr1	10001325	10001822	P0vsP39_P39_hypo_dmr_965|6|0.920|0.588	0	.
chr1	10008025	10008063	P0vsP39_P39_hypo_dmr_968|7|0.940|0.536	0	.
chr1	10011312	10013452	P0vsP39_P39_hypo_dmr_970|33|0.809|0.433	0	.
chr1	10034337	10035284	P0vsP39_P39_hypo_dmr_981|12|0.905|0.596	0	.
chr1	10036397	10036896	P0vsP39_P39_hypo_dmr_982|7|0.917|0.502	0	.
chr1	10040574	10040711	P0vsP39_P39_hypo_dmr_984|4|0.443|0.036	0	.
chr1	10066909	10067535	P0vsP39_P39_hypo_dmr_997|5|0.938|0.596	0	.
chr1	10081268	10081750	P0vsP39_P39_hypo_dmr_1003|4|0.950|0.595	0	.
chr1	10102409	10102640	P0vsP39_P39_hypo_dmr_1008|9|0.928|0.545	0	.
chr1	10116663	10116940	P0vsP39_P39_hypo_dmr_1015|15|0.938|0.466	0	.
chr1	10121836	10122425	P0vsP39_P39_hypo_dmr_1017|4|0.986|0.565	0	.
chr1	10125978	10128237	P0vsP39_P39_hypo_dmr_1019|22|0.928|0.586	0	.
chr1	10132899	10134644	P0vsP39_P39_hypo_dmr_1021|21|0.916|0.382	0	.
chr1	10135992	10136780	P0vsP39_P39_hypo_dmr_1022|16|0.757|0.353	0	.
chr1	10137908	10139612	P0vsP39_P39_hypo_dmr_1023|23|0.904|0.599	0	.
chr1	10140530	10142259	P0vsP39_P39_hypo_dmr_1024|43|0.886|0.426	0	.
chr1	10163968	10164428	P0vsP39_P39_hypo_dmr_1032|5|0.944|0.564	0	.
chr1	10176959	10178393	P0vsP39_P39_hypo_dmr_1036|7|0.940|0.560	0	.
chr1	10179834	10180277	P0vsP39_P39_hypo_dmr_1037|9|0.859|0.473	0	.
chr1	10190349	10190871	P0vsP39_P39_hypo_dmr_1043|6|0.959|0.645	0	.
chr1	10192494	10194549	P0vsP39_P39_hypo_dmr_1044|22|0.889|0.449	0	.
chr1	10211723	10211803	P0vsP39_P39_hypo_dmr_1051|3|0.942|0.466	0	.
chr1	10218569	10219056	P0vsP39_P39_hypo_dmr_1055|5|0.903|0.486	0	.
chr1	10221877	10222784	P0vsP39_P39_hypo_dmr_1056|8|0.912|0.529	0	.
chr1	10228543	10228865	P0vsP39_P39_hypo_dmr_1059|6|0.960|0.596	0	.
chr1	10229369	10230638	P0vsP39_P39_hypo_dmr_1060|17|0.851|0.347	0	.
chr1	10247466	10247507	P0vsP39_P39_hypo_dmr_1063|4|0.826|0.305	0	.
chr1	10287019	10287354	P0vsP39_P39_hypo_dmr_1068|6|0.835|0.518	0	.
chr1	10300190	10300283	P0vsP39_P39_hypo_dmr_1069|5|0.905|0.525	0	.
chr1	10355273	10355303	P0vsP39_P39_hypo_dmr_1081|4|0.676|0.222	0	.
chr1	10462192	10462907	P0vsP39_P39_hypo_dmr_1093|4|0.943|0.557	0	.
chr1	10486414	10486963	P0vsP39_P39_hypo_dmr_1097|6|0.849|0.491	0	.
chr1	10489724	10489966	P0vsP39_P39_hypo_dmr_1099|5|0.826|0.420	0	.
chr1	10535291	10536194	P0vsP39_P39_hypo_dmr_1102|12|0.882|0.513	0	.
chr1	10570786	10571708	P0vsP39_P39_hypo_dmr_1105|12|0.873|0.449	0	.
chr1	10592726	10592974	P0vsP39_P39_hypo_dmr_1108|6|0.871|0.406	0	.
chr1	10607153	10607712	P0vsP39_P39_hypo_dmr_1110|6|0.886|0.535	0	.
chr1	10673543	10673556	P0vsP39_P39_hypo_dmr_1115|4|0.847|0.527	0	.
chr1	10699709	10700085	P0vsP39_P39_hypo_dmr_1120|4|0.674|0.371	0	.
chr1	10701014	10701134	P0vsP39_P39_hypo_dmr_1121|10|0.783|0.171	0	.
chr1	10720993	10721463	P0vsP39_P39_hypo_dmr_1126|7|0.780|0.392	0	.
chr1	10768816	10769039	P0vsP39_P39_hypo_dmr_1128|3|0.843|0.483	0	.
chr1	10792973	10793421	P0vsP39_P39_hypo_dmr_1130|3|0.953|0.517	0	.
chr1	10861500	10861556	P0vsP39_P39_hypo_dmr_1137|4|0.846|0.403	0	.
chr1	10875184	10876530	P0vsP39_P39_hypo_dmr_1139|13|0.931|0.607	0	.
chr1	10880419	10880604	P0vsP39_P39_hypo_dmr_1141|3|0.895|0.525	0	.
chr1	10954857	10955631	P0vsP39_P39_hypo_dmr_1152|8|0.919|0.501	0	.
chr1	11026118	11026993	P0vsP39_P39_hypo_dmr_1158|8|0.806|0.465	0	.
chr1	11065680	11065692	P0vsP39_P39_hypo_dmr_1168|4|0.937|0.519	0	.
chr1	11073282	11073809	P0vsP39_P39_hypo_dmr_1170|3|0.949|0.602	0	.
chr1	11099607	11100013	P0vsP39_P39_hypo_dmr_1174|8|0.878|0.418	0	.
chr1	11117555	11118169	P0vsP39_P39_hypo_dmr_1178|5|0.901|0.510	0	.
chr1	11169109	11170642	P0vsP39_P39_hypo_dmr_1187|23|0.873|0.547	0	.
chr1	11178380	11178948	P0vsP39_P39_hypo_dmr_1188|6|0.945|0.637	0	.
chr1	11207249	11207431	P0vsP39_P39_hypo_dmr_1193|3|0.931|0.537	0	.
chr1	11214094	11214538	P0vsP39_P39_hypo_dmr_1194|5|0.911|0.340	0	.
chr1	11216542	11216706	P0vsP39_P39_hypo_dmr_1195|7|0.797|0.276	0	.
chr1	11217286	11217800	P0vsP39_P39_hypo_dmr_1196|8|0.892|0.528	0	.
chr1	11246398	11246516	P0vsP39_P39_hypo_dmr_1200|3|0.930|0.594	0	.
chr1	11280767	11280792	P0vsP39_P39_hypo_dmr_1206|3|0.892|0.562	0	.
chr1	11383717	11383915	P0vsP39_P39_hypo_dmr_1214|3|0.923|0.604	0	.
chr1	11407268	11408507	P0vsP39_P39_hypo_dmr_1217|6|0.915|0.611	0	.
chr1	11415001	11416345	P0vsP39_P39_hypo_dmr_1220|20|0.768|0.319	0	.
chr1	11416916	11417834	P0vsP39_P39_hypo_dmr_1221|15|0.892|0.502	0	.
chr1	11427195	11427986	P0vsP39_P39_hypo_dmr_1223|13|0.921|0.446	0	.
chr1	11432985	11433132	P0vsP39_P39_hypo_dmr_1225|5|0.606|0.143	0	.
chr1	11439133	11439187	P0vsP39_P39_hypo_dmr_1227|4|0.875|0.296	0	.
chr1	11447368	11447862	P0vsP39_P39_hypo_dmr_1230|3|0.684|0.314	0	.
chr1	11451383	11451502	P0vsP39_P39_hypo_dmr_1231|4|0.862|0.389	0	.
chr1	11458288	11458293	P0vsP39_P39_hypo_dmr_1232|3|0.884|0.532	0	.
chr1	11474963	11475150	P0vsP39_P39_hypo_dmr_1235|4|0.953|0.544	0	.
chr1	11488680	11488960	P0vsP39_P39_hypo_dmr_1237|3|0.955|0.562	0	.
chr1	11517060	11517114	P0vsP39_P39_hypo_dmr_1238|3|0.888|0.353	0	.
chr1	11517738	11517814	P0vsP39_P39_hypo_dmr_1239|4|0.832|0.318	0	.
chr1	11546263	11546375	P0vsP39_P39_hypo_dmr_1243|4|0.772|0.300	0	.
chr1	11553866	11554188	P0vsP39_P39_hypo_dmr_1244|5|0.881|0.567	0	.
chr1	11563922	11564233	P0vsP39_P39_hypo_dmr_1247|4|0.940|0.517	0	.
chr1	11565122	11565231	P0vsP39_P39_hypo_dmr_1248|7|0.583|0.088	0	.
chr1	11566248	11566913	P0vsP39_P39_hypo_dmr_1249|14|0.876|0.376	0	.
chr1	11573747	11573911	P0vsP39_P39_hypo_dmr_1250|6|0.712|0.113	0	.
chr1	11577901	11578085	P0vsP39_P39_hypo_dmr_1251|4|0.706|0.110	0	.
chr1	11614210	11614259	P0vsP39_P39_hypo_dmr_1258|4|0.875|0.476	0	.
chr1	11627008	11628198	P0vsP39_P39_hypo_dmr_1259|15|0.931|0.513	0	.
chr1	11629172	11629530	P0vsP39_P39_hypo_dmr_1260|4|0.955|0.627	0	.
chr1	11648959	11649025	P0vsP39_P39_hypo_dmr_1265|4|0.866|0.215	0	.
chr1	11712695	11712761	P0vsP39_P39_hypo_dmr_1269|3|0.944|0.627	0	.
chr1	11739439	11739923	P0vsP39_P39_hypo_dmr_1270|5|0.921|0.466	0	.
chr1	11742474	11743183	P0vsP39_P39_hypo_dmr_1271|4|0.756|0.394	0	.
chr1	11750548	11751073	P0vsP39_P39_hypo_dmr_1275|5|0.531|0.112	0	.
chr1	11853414	11853729	P0vsP39_P39_hypo_dmr_1290|3|0.984|0.621	0	.
chr1	11864785	11864832	P0vsP39_P39_hypo_dmr_1293|4|0.911|0.599	0	.
chr1	11896286	11896664	P0vsP39_P39_hypo_dmr_1295|3|0.911|0.504	0	.
chr1	11898694	11898924	P0vsP39_P39_hypo_dmr_1296|3|0.847|0.465	0	.
chr1	11913114	11913170	P0vsP39_P39_hypo_dmr_1299|4|0.696|0.259	0	.
chr1	11913809	11914016	P0vsP39_P39_hypo_dmr_1300|3|0.915|0.576	0	.
chr1	12010555	12011308	P0vsP39_P39_hypo_dmr_1315|7|0.749|0.310	0	.
chr1	12032028	12032071	P0vsP39_P39_hypo_dmr_1317|3|0.928|0.612	0	.
chr1	12112977	12113630	P0vsP39_P39_hypo_dmr_1319|7|0.912|0.553	0	.
chr1	12183298	12184041	P0vsP39_P39_hypo_dmr_1323|4|0.963|0.575	0	.
chr1	12307095	12307400	P0vsP39_P39_hypo_dmr_1339|3|0.732|0.421	0	.
chr1	12310199	12311176	P0vsP39_P39_hypo_dmr_1340|6|0.734|0.250	0	.
chr1	12319023	12319181	P0vsP39_P39_hypo_dmr_1341|5|0.884|0.547	0	.
chr1	12367373	12368652	P0vsP39_P39_hypo_dmr_1344|22|0.777|0.141	0	.
chr1	12390253	12390325	P0vsP39_P39_hypo_dmr_1348|3|0.924|0.515	0	.
chr1	12419213	12419390	P0vsP39_P39_hypo_dmr_1352|3|0.957|0.645	0	.
chr1	12449500	12449589	P0vsP39_P39_hypo_dmr_1355|3|0.866|0.481	0	.
chr1	12454705	12454711	P0vsP39_P39_hypo_dmr_1358|4|0.985|0.564	0	.
chr1	12475765	12475985	P0vsP39_P39_hypo_dmr_1359|8|0.748|0.435	0	.
chr1	12488916	12489108	P0vsP39_P39_hypo_dmr_1361|3|0.640|0.303	0	.
chr1	12510211	12510852	P0vsP39_P39_hypo_dmr_1365|12|0.565|0.252	0	.
chr1	12519491	12520089	P0vsP39_P39_hypo_dmr_1366|13|0.878|0.336	0	.
chr1	12526806	12527078	P0vsP39_P39_hypo_dmr_1367|6|0.740|0.247	0	.
chr1	12529226	12530227	P0vsP39_P39_hypo_dmr_1368|8|0.813|0.446	0	.
chr1	12541215	12541533	P0vsP39_P39_hypo_dmr_1370|3|0.692|0.317	0	.
chr1	12565368	12565568	P0vsP39_P39_hypo_dmr_1376|4|0.853|0.536	0	.
chr1	12607989	12608593	P0vsP39_P39_hypo_dmr_1386|6|0.941|0.499	0	.
chr1	12619636	12621127	P0vsP39_P39_hypo_dmr_1389|24|0.799|0.241	0	.
chr1	12623037	12623500	P0vsP39_P39_hypo_dmr_1391|12|0.943|0.299	0	.
chr1	12655487	12655513	P0vsP39_P39_hypo_dmr_1395|3|0.936|0.557	0	.
chr1	12658075	12658634	P0vsP39_P39_hypo_dmr_1396|6|0.879|0.470	0	.
chr1	12669270	12669890	P0vsP39_P39_hypo_dmr_1397|5|0.868|0.522	0	.
chr1	12715532	12715635	P0vsP39_P39_hypo_dmr_1409|3|0.885|0.438	0	.
chr1	12721264	12721714	P0vsP39_P39_hypo_dmr_1411|9|0.943|0.541	0	.
chr1	12722706	12723051	P0vsP39_P39_hypo_dmr_1412|3|0.959|0.536	0	.
chr1	12742401	12743120	P0vsP39_P39_hypo_dmr_1417|6|0.910|0.536	0	.
chr1	12800598	12800705	P0vsP39_P39_hypo_dmr_1439|4|0.924|0.451	0	.
chr1	12864531	12865468	P0vsP39_P39_hypo_dmr_1456|30|0.721|0.368	0	.
chr1	12874502	12874672	P0vsP39_P39_hypo_dmr_1462|5|0.929|0.291	0	.
chr1	12877753	12878365	P0vsP39_P39_hypo_dmr_1464|7|0.769|0.382	0	.
chr1	12961135	12961497	P0vsP39_P39_hypo_dmr_1478|3|0.912|0.570	0	.
chr1	12973119	12974540	P0vsP39_P39_hypo_dmr_1481|11|0.833|0.503	0	.
chr1	13002370	13002923	P0vsP39_P39_hypo_dmr_1487|10|0.883|0.460	0	.
chr1	13042851	13042872	P0vsP39_P39_hypo_dmr_1493|4|0.933|0.599	0	.
chr1	13045111	13045736	P0vsP39_P39_hypo_dmr_1494|4|0.857|0.447	0	.
chr1	13050537	13050759	P0vsP39_P39_hypo_dmr_1496|5|0.648|0.256	0	.
chr1	13117200	13117820	P0vsP39_P39_hypo_dmr_1511|4|0.854|0.541	0	.
chr1	13155840	13155899	P0vsP39_P39_hypo_dmr_1523|3|0.830|0.421	0	.
chr1	13156912	13156920	P0vsP39_P39_hypo_dmr_1524|4|0.959|0.553	0	.
chr1	13183967	13184765	P0vsP39_P39_hypo_dmr_1537|16|0.881|0.541	0	.
chr1	13187300	13190142	P0vsP39_P39_hypo_dmr_1539|60|0.697|0.307	0	.
chr1	13193851	13194036	P0vsP39_P39_hypo_dmr_1541|4|0.920|0.587	0	.
chr1	13196387	13196884	P0vsP39_P39_hypo_dmr_1543|13|0.578|0.261	0	.
chr1	13197504	13197662	P0vsP39_P39_hypo_dmr_1544|4|0.924|0.217	0	.
chr1	13204309	13205955	P0vsP39_P39_hypo_dmr_1546|32|0.884|0.531	0	.
chr1	13214331	13214676	P0vsP39_P39_hypo_dmr_1548|9|0.847|0.490	0	.
chr1	13230737	13231028	P0vsP39_P39_hypo_dmr_1554|3|0.778|0.449	0	.
chr1	13235942	13236660	P0vsP39_P39_hypo_dmr_1555|17|0.926|0.593	0	.
chr1	13237527	13238734	P0vsP39_P39_hypo_dmr_1556|14|0.904|0.532	0	.
chr1	13244107	13245481	P0vsP39_P39_hypo_dmr_1559|15|0.732|0.398	0	.
chr1	13255304	13256959	P0vsP39_P39_hypo_dmr_1561|33|0.868|0.455	0	.
chr1	13261252	13262154	P0vsP39_P39_hypo_dmr_1564|13|0.922|0.536	0	.
chr1	13281395	13281707	P0vsP39_P39_hypo_dmr_1569|11|0.926|0.438	0	.
chr1	13288889	13289522	P0vsP39_P39_hypo_dmr_1574|18|0.788|0.289	0	.
chr1	13295644	13296409	P0vsP39_P39_hypo_dmr_1579|12|0.859|0.422	0	.
chr1	13299301	13300506	P0vsP39_P39_hypo_dmr_1581|24|0.721|0.284	0	.
chr1	13304660	13306559	P0vsP39_P39_hypo_dmr_1583|29|0.884|0.375	0	.
chr1	13307220	13307453	P0vsP39_P39_hypo_dmr_1584|3|0.858|0.471	0	.
chr1	13308190	13308519	P0vsP39_P39_hypo_dmr_1585|12|0.879|0.462	0	.
chr1	13313686	13313835	P0vsP39_P39_hypo_dmr_1589|4|0.812|0.396	0	.
chr1	13314735	13314842	P0vsP39_P39_hypo_dmr_1591|4|0.500|0.091	0	.
chr1	13317128	13317227	P0vsP39_P39_hypo_dmr_1592|3|0.895|0.525	0	.
chr1	13318933	13319273	P0vsP39_P39_hypo_dmr_1593|3|0.972|0.652	0	.
chr1	13319997	13320646	P0vsP39_P39_hypo_dmr_1594|9|0.897|0.555	0	.
chr1	13326514	13327321	P0vsP39_P39_hypo_dmr_1595|18|0.651|0.264	0	.
chr1	13337279	13337416	P0vsP39_P39_hypo_dmr_1601|3|0.931|0.607	0	.
chr1	13339272	13340206	P0vsP39_P39_hypo_dmr_1602|13|0.801|0.455	0	.
chr1	13353575	13353691	P0vsP39_P39_hypo_dmr_1609|3|0.864|0.466	0	.
chr1	13366269	13367199	P0vsP39_P39_hypo_dmr_1615|28|0.711|0.283	0	.
chr1	13378349	13378851	P0vsP39_P39_hypo_dmr_1619|3|0.819|0.445	0	.
chr1	13423197	13424467	P0vsP39_P39_hypo_dmr_1628|24|0.835|0.484	0	.
chr1	13454956	13455058	P0vsP39_P39_hypo_dmr_1634|5|0.915|0.518	0	.
chr1	13526927	13527010	P0vsP39_P39_hypo_dmr_1649|4|0.851|0.409	0	.
chr1	13567422	13567871	P0vsP39_P39_hypo_dmr_1658|12|0.908|0.457	0	.
chr1	13568468	13568954	P0vsP39_P39_hypo_dmr_1659|14|0.932|0.332	0	.
chr1	13600246	13601186	P0vsP39_P39_hypo_dmr_1663|7|0.868|0.544	0	.
chr1	13647776	13648235	P0vsP39_P39_hypo_dmr_1674|16|0.917|0.587	0	.
chr1	13651466	13651881	P0vsP39_P39_hypo_dmr_1676|5|0.731|0.394	0	.
chr1	13665210	13665732	P0vsP39_P39_hypo_dmr_1680|3|0.910|0.602	0	.
chr1	13683379	13683394	P0vsP39_P39_hypo_dmr_1684|3|0.656|0.180	0	.
chr1	13693240	13693519	P0vsP39_P39_hypo_dmr_1686|11|0.876|0.432	0	.
chr1	13738429	13739013	P0vsP39_P39_hypo_dmr_1691|9|0.895|0.509	0	.
chr1	13752017	13753810	P0vsP39_P39_hypo_dmr_1693|11|0.811|0.399	0	.
chr1	13757332	13757489	P0vsP39_P39_hypo_dmr_1694|4|0.906|0.551	0	.
chr1	13762805	13763082	P0vsP39_P39_hypo_dmr_1695|3|0.982|0.669	0	.
chr1	13788979	13789005	P0vsP39_P39_hypo_dmr_1701|3|0.750|0.396	0	.
chr1	13791053	13791431	P0vsP39_P39_hypo_dmr_1702|3|0.973|0.671	0	.
chr1	13801079	13802745	P0vsP39_P39_hypo_dmr_1703|15|0.941|0.636	0	.
chr1	13820711	13820834	P0vsP39_P39_hypo_dmr_1705|3|0.727|0.420	0	.
chr1	13826182	13826488	P0vsP39_P39_hypo_dmr_1707|5|0.860|0.465	0	.
chr1	13864880	13865178	P0vsP39_P39_hypo_dmr_1714|6|0.834|0.193	0	.
chr1	13870842	13871555	P0vsP39_P39_hypo_dmr_1716|11|0.602|0.154	0	.
chr1	13901793	13902000	P0vsP39_P39_hypo_dmr_1718|4|0.919|0.535	0	.
chr1	13953498	13953881	P0vsP39_P39_hypo_dmr_1726|5|0.956|0.470	0	.
chr1	13957833	13958053	P0vsP39_P39_hypo_dmr_1727|3|0.978|0.659	0	.
chr1	13960352	13960723	P0vsP39_P39_hypo_dmr_1728|3|0.993|0.640	0	.
chr1	14100978	14101222	P0vsP39_P39_hypo_dmr_1744|8|0.925|0.440	0	.
chr1	14141125	14141357	P0vsP39_P39_hypo_dmr_1752|3|0.904|0.550	0	.
chr1	14144183	14144389	P0vsP39_P39_hypo_dmr_1753|5|0.871|0.440	0	.
chr1	14204418	14206211	P0vsP39_P39_hypo_dmr_1768|18|0.836|0.470	0	.
chr1	14208618	14209020	P0vsP39_P39_hypo_dmr_1770|7|0.944|0.517	0	.
chr1	14229850	14230028	P0vsP39_P39_hypo_dmr_1774|3|0.925|0.558	0	.
chr1	14265090	14265601	P0vsP39_P39_hypo_dmr_1782|15|0.788|0.256	0	.
chr1	14296640	14296669	P0vsP39_P39_hypo_dmr_1790|4|0.923|0.504	0	.
chr1	14334960	14335404	P0vsP39_P39_hypo_dmr_1802|4|0.935|0.586	0	.
chr1	14384554	14385414	P0vsP39_P39_hypo_dmr_1811|13|0.922|0.511	0	.
chr1	14484515	14484676	P0vsP39_P39_hypo_dmr_1823|5|0.941|0.250	0	.
chr1	14555764	14556203	P0vsP39_P39_hypo_dmr_1832|3|0.762|0.324	0	.
chr1	14584933	14585253	P0vsP39_P39_hypo_dmr_1839|6|0.903|0.470	0	.
chr1	14605649	14606182	P0vsP39_P39_hypo_dmr_1844|3|0.986|0.681	0	.
chr1	14625986	14626000	P0vsP39_P39_hypo_dmr_1846|4|0.839|0.359	0	.
chr1	14641275	14641582	P0vsP39_P39_hypo_dmr_1850|4|0.875|0.554	0	.
chr1	14667261	14668176	P0vsP39_P39_hypo_dmr_1852|18|0.887|0.572	0	.
chr1	14685119	14685338	P0vsP39_P39_hypo_dmr_1858|3|0.779|0.418	0	.
chr1	14891795	14891874	P0vsP39_P39_hypo_dmr_1881|4|0.688|0.210	0	.
chr1	14940186	14940262	P0vsP39_P39_hypo_dmr_1893|4|0.747|0.418	0	.
chr1	14955364	14955713	P0vsP39_P39_hypo_dmr_1894|3|0.912|0.546	0	.
chr1	14994957	14996434	P0vsP39_P39_hypo_dmr_1897|10|0.922|0.615	0	.
chr1	15042341	15042690	P0vsP39_P39_hypo_dmr_1899|3|0.949|0.632	0	.
chr1	15143163	15143736	P0vsP39_P39_hypo_dmr_1908|3|0.905|0.589	0	.
chr1	15155235	15155625	P0vsP39_P39_hypo_dmr_1911|9|0.899|0.573	0	.
chr1	15179675	15179761	P0vsP39_P39_hypo_dmr_1912|3|0.898|0.550	0	.
chr1	15186188	15186857	P0vsP39_P39_hypo_dmr_1913|3|0.958|0.638	0	.
chr1	15247810	15247840	P0vsP39_P39_hypo_dmr_1917|4|0.852|0.361	0	.
chr1	15285033	15285326	P0vsP39_P39_hypo_dmr_1921|3|0.963|0.661	0	.
chr1	15291926	15293355	P0vsP39_P39_hypo_dmr_1923|21|0.888|0.538	0	.
chr1	15301635	15301640	P0vsP39_P39_hypo_dmr_1926|4|0.911|0.516	0	.
chr1	15315140	15315409	P0vsP39_P39_hypo_dmr_1930|8|0.930|0.603	0	.
chr1	15351942	15352004	P0vsP39_P39_hypo_dmr_1938|3|0.905|0.603	0	.
chr1	15358249	15359656	P0vsP39_P39_hypo_dmr_1939|20|0.877|0.305	0	.
chr1	15406779	15407157	P0vsP39_P39_hypo_dmr_1943|7|0.930|0.491	0	.
chr1	15413815	15414103	P0vsP39_P39_hypo_dmr_1945|13|0.732|0.312	0	.
chr1	15473408	15473594	P0vsP39_P39_hypo_dmr_1952|4|0.947|0.586	0	.
chr1	15474634	15474699	P0vsP39_P39_hypo_dmr_1953|4|0.749|0.333	0	.
chr1	15482014	15482402	P0vsP39_P39_hypo_dmr_1954|6|0.815|0.381	0	.
chr1	15487068	15487202	P0vsP39_P39_hypo_dmr_1956|4|0.917|0.607	0	.
chr1	15490310	15490886	P0vsP39_P39_hypo_dmr_1957|5|0.930|0.605	0	.
chr1	15516374	15516754	P0vsP39_P39_hypo_dmr_1960|9|0.730|0.315	0	.
chr1	15530974	15531120	P0vsP39_P39_hypo_dmr_1961|3|0.882|0.454	0	.
chr1	15552253	15552447	P0vsP39_P39_hypo_dmr_1968|4|0.928|0.599	0	.
chr1	15605314	15605590	P0vsP39_P39_hypo_dmr_1979|5|0.917|0.546	0	.
chr1	15613846	15614388	P0vsP39_P39_hypo_dmr_1982|6|0.865|0.422	0	.
chr1	15653105	15653242	P0vsP39_P39_hypo_dmr_1992|3|0.951|0.520	0	.
chr1	15654149	15654196	P0vsP39_P39_hypo_dmr_1993|3|0.942|0.639	0	.
chr1	15683404	15683550	P0vsP39_P39_hypo_dmr_1995|10|0.638|0.135	0	.
chr1	15723785	15724041	P0vsP39_P39_hypo_dmr_2002|6|0.931|0.521	0	.
chr1	15724626	15724747	P0vsP39_P39_hypo_dmr_2003|3|0.953|0.637	0	.
chr1	15725401	15725864	P0vsP39_P39_hypo_dmr_2004|4|0.914|0.548	0	.
chr1	15770015	15771685	P0vsP39_P39_hypo_dmr_2010|23|0.759|0.410	0	.
chr1	15777224	15778350	P0vsP39_P39_hypo_dmr_2012|10|0.907|0.524	0	.
chr1	15778986	15779855	P0vsP39_P39_hypo_dmr_2013|11|0.926|0.494	0	.
chr1	15820583	15820915	P0vsP39_P39_hypo_dmr_2021|7|0.965|0.544	0	.
chr1	15847076	15848321	P0vsP39_P39_hypo_dmr_2025|15|0.966|0.524	0	.
chr1	15850245	15851343	P0vsP39_P39_hypo_dmr_2027|16|0.789|0.335	0	.
chr1	15851894	15852513	P0vsP39_P39_hypo_dmr_2028|6|0.898|0.459	0	.
chr1	15899287	15900131	P0vsP39_P39_hypo_dmr_2038|9|0.879|0.551	0	.
chr1	15902203	15902402	P0vsP39_P39_hypo_dmr_2039|3|0.908|0.595	0	.
chr1	15905160	15905522	P0vsP39_P39_hypo_dmr_2042|6|0.637|0.227	0	.
chr1	15914210	15915073	P0vsP39_P39_hypo_dmr_2046|19|0.919|0.488	0	.
chr1	15918719	15918808	P0vsP39_P39_hypo_dmr_2047|3|0.901|0.366	0	.
chr1	15943803	15944605	P0vsP39_P39_hypo_dmr_2049|19|0.875|0.417	0	.
chr1	15961292	15961435	P0vsP39_P39_hypo_dmr_2051|6|0.838|0.291	0	.
chr1	15972663	15973544	P0vsP39_P39_hypo_dmr_2052|17|0.915|0.473	0	.
chr1	15985662	15985715	P0vsP39_P39_hypo_dmr_2053|4|0.821|0.357	0	.
chr1	15986610	15987000	P0vsP39_P39_hypo_dmr_2054|7|0.912|0.611	0	.
chr1	16007831	16008086	P0vsP39_P39_hypo_dmr_2059|3|0.796|0.401	0	.
chr1	16064521	16064541	P0vsP39_P39_hypo_dmr_2068|3|0.883|0.560	0	.
chr1	16177585	16177996	P0vsP39_P39_hypo_dmr_2088|14|0.808|0.384	0	.
chr1	16179934	16180018	P0vsP39_P39_hypo_dmr_2090|3|0.767|0.443	0	.
chr1	16201748	16201764	P0vsP39_P39_hypo_dmr_2094|3|0.554|0.187	0	.
chr1	16237284	16237904	P0vsP39_P39_hypo_dmr_2102|8|0.920|0.533	0	.
chr1	16253961	16254044	P0vsP39_P39_hypo_dmr_2107|3|0.505|0.147	0	.
chr1	16255933	16257060	P0vsP39_P39_hypo_dmr_2108|16|0.664|0.315	0	.
chr1	16258052	16258817	P0vsP39_P39_hypo_dmr_2109|12|0.715|0.351	0	.
chr1	16259768	16260422	P0vsP39_P39_hypo_dmr_2110|7|0.884|0.583	0	.
chr1	16266892	16267441	P0vsP39_P39_hypo_dmr_2114|11|0.911|0.495	0	.
chr1	16272075	16272149	P0vsP39_P39_hypo_dmr_2117|4|0.828|0.348	0	.
chr1	16294624	16294801	P0vsP39_P39_hypo_dmr_2123|6|0.500|0.194	0	.
chr1	16336463	16336629	P0vsP39_P39_hypo_dmr_2135|4|0.962|0.307	0	.
chr1	16386954	16387524	P0vsP39_P39_hypo_dmr_2145|3|0.943|0.493	0	.
chr1	16428534	16428665	P0vsP39_P39_hypo_dmr_2155|3|0.963|0.577	0	.
chr1	16436720	16436729	P0vsP39_P39_hypo_dmr_2157|4|0.935|0.595	0	.
chr1	16437689	16437705	P0vsP39_P39_hypo_dmr_2158|4|0.664|0.172	0	.
chr1	16452020	16452907	P0vsP39_P39_hypo_dmr_2160|4|0.957|0.651	0	.
chr1	16509477	16509680	P0vsP39_P39_hypo_dmr_2175|5|0.827|0.489	0	.
chr1	16512761	16514137	P0vsP39_P39_hypo_dmr_2177|19|0.861|0.442	0	.
chr1	16517722	16518337	P0vsP39_P39_hypo_dmr_2178|5|0.469|0.145	0	.
chr1	16553142	16553451	P0vsP39_P39_hypo_dmr_2180|4|0.982|0.630	0	.
chr1	16554869	16555494	P0vsP39_P39_hypo_dmr_2181|9|0.798|0.281	0	.
chr1	16557811	16560024	P0vsP39_P39_hypo_dmr_2182|29|0.893|0.463	0	.
chr1	16562233	16563581	P0vsP39_P39_hypo_dmr_2184|10|0.780|0.398	0	.
chr1	16573048	16573380	P0vsP39_P39_hypo_dmr_2189|6|0.843|0.518	0	.
chr1	16574025	16575554	P0vsP39_P39_hypo_dmr_2190|14|0.933|0.597	0	.
chr1	16576092	16576387	P0vsP39_P39_hypo_dmr_2191|6|0.884|0.452	0	.
chr1	16587103	16589849	P0vsP39_P39_hypo_dmr_2196|33|0.878|0.512	0	.
chr1	16594024	16594290	P0vsP39_P39_hypo_dmr_2198|6|0.899|0.518	0	.
chr1	16595386	16596185	P0vsP39_P39_hypo_dmr_2199|6|0.915|0.615	0	.
chr1	16611556	16613609	P0vsP39_P39_hypo_dmr_2203|23|0.906|0.572	0	.
chr1	16614163	16616769	P0vsP39_P39_hypo_dmr_2204|35|0.810|0.341	0	.
chr1	16619915	16620604	P0vsP39_P39_hypo_dmr_2206|21|0.625|0.184	0	.
chr1	16626445	16627163	P0vsP39_P39_hypo_dmr_2207|4|0.832|0.490	0	.
chr1	16633584	16633895	P0vsP39_P39_hypo_dmr_2209|6|0.788|0.356	0	.
chr1	16636228	16637674	P0vsP39_P39_hypo_dmr_2210|21|0.809|0.129	0	.
chr1	16664759	16664966	P0vsP39_P39_hypo_dmr_2218|3|0.855|0.551	0	.
chr1	16665963	16666380	P0vsP39_P39_hypo_dmr_2219|7|0.613|0.257	0	.
chr1	16690868	16691213	P0vsP39_P39_hypo_dmr_2228|3|0.871|0.396	0	.
chr1	16702657	16702980	P0vsP39_P39_hypo_dmr_2230|5|0.884|0.555	0	.
chr1	16704441	16704456	P0vsP39_P39_hypo_dmr_2232|3|0.897|0.569	0	.
chr1	16758664	16759694	P0vsP39_P39_hypo_dmr_2238|12|0.822|0.256	0	.
chr1	16760853	16761231	P0vsP39_P39_hypo_dmr_2239|3|0.913|0.397	0	.
chr1	16808334	16808777	P0vsP39_P39_hypo_dmr_2245|3|0.982|0.646	0	.
chr1	16809277	16810203	P0vsP39_P39_hypo_dmr_2246|16|0.791|0.319	0	.
chr1	16915874	16916380	P0vsP39_P39_hypo_dmr_2258|5|0.911|0.610	0	.
chr1	16917068	16917826	P0vsP39_P39_hypo_dmr_2259|14|0.736|0.394	0	.
chr1	16930890	16931582	P0vsP39_P39_hypo_dmr_2260|5|0.866|0.557	0	.
chr1	16934369	16934612	P0vsP39_P39_hypo_dmr_2261|4|0.523|0.116	0	.
chr1	16935127	16935557	P0vsP39_P39_hypo_dmr_2262|7|0.884|0.451	0	.
chr1	16957195	16957272	P0vsP39_P39_hypo_dmr_2265|3|0.942|0.596	0	.
chr1	16987270	16988210	P0vsP39_P39_hypo_dmr_2272|21|0.892|0.243	0	.
chr1	16988964	16989074	P0vsP39_P39_hypo_dmr_2273|3|0.944|0.317	0	.
chr1	17003159	17003202	P0vsP39_P39_hypo_dmr_2278|4|0.832|0.185	0	.
chr1	17007511	17008649	P0vsP39_P39_hypo_dmr_2279|13|0.811|0.377	0	.
chr1	17015820	17016405	P0vsP39_P39_hypo_dmr_2281|10|0.819|0.514	0	.
chr1	17025066	17025525	P0vsP39_P39_hypo_dmr_2283|4|0.968|0.644	0	.
chr1	17041623	17043773	P0vsP39_P39_hypo_dmr_2287|23|0.626|0.288	0	.
chr1	17044344	17044666	P0vsP39_P39_hypo_dmr_2288|8|0.809|0.399	0	.
chr1	17050405	17050646	P0vsP39_P39_hypo_dmr_2290|3|0.984|0.661	0	.
chr1	17053883	17054104	P0vsP39_P39_hypo_dmr_2292|4|0.625|0.190	0	.
chr1	17070558	17070728	P0vsP39_P39_hypo_dmr_2297|4|0.738|0.353	0	.
chr1	17072715	17072990	P0vsP39_P39_hypo_dmr_2298|8|0.924|0.594	0	.
chr1	17082282	17083081	P0vsP39_P39_hypo_dmr_2301|8|0.914|0.610	0	.
chr1	17085110	17085541	P0vsP39_P39_hypo_dmr_2302|5|0.879|0.454	0	.
chr1	17098391	17098781	P0vsP39_P39_hypo_dmr_2305|4|0.620|0.128	0	.
chr1	17114090	17114220	P0vsP39_P39_hypo_dmr_2309|3|0.984|0.663	0	.
chr1	17120060	17122062	P0vsP39_P39_hypo_dmr_2311|34|0.735|0.306	0	.
chr1	17132282	17132849	P0vsP39_P39_hypo_dmr_2313|7|0.832|0.414	0	.
chr1	17150205	17150405	P0vsP39_P39_hypo_dmr_2316|3|0.807|0.287	0	.
chr1	17158378	17158496	P0vsP39_P39_hypo_dmr_2317|3|0.891|0.490	0	.
chr1	17172072	17173245	P0vsP39_P39_hypo_dmr_2319|18|0.786|0.382	0	.
chr1	17190685	17191049	P0vsP39_P39_hypo_dmr_2321|3|0.859|0.555	0	.
chr1	17227942	17228145	P0vsP39_P39_hypo_dmr_2324|3|0.981|0.577	0	.
chr1	17311021	17312168	P0vsP39_P39_hypo_dmr_2328|12|0.771|0.363	0	.
chr1	17322636	17322927	P0vsP39_P39_hypo_dmr_2329|4|0.888|0.582	0	.
chr1	17449267	17449467	P0vsP39_P39_hypo_dmr_2337|3|0.867|0.457	0	.
chr1	17537240	17537404	P0vsP39_P39_hypo_dmr_2346|3|0.828|0.383	0	.
chr1	17574334	17574704	P0vsP39_P39_hypo_dmr_2347|3|0.934|0.623	0	.
chr1	17664752	17665547	P0vsP39_P39_hypo_dmr_2353|4|0.790|0.480	0	.
chr1	17718687	17718918	P0vsP39_P39_hypo_dmr_2356|6|0.775|0.180	0	.
chr1	17753519	17753813	P0vsP39_P39_hypo_dmr_2359|4|0.795|0.399	0	.
chr1	17759330	17760323	P0vsP39_P39_hypo_dmr_2360|17|0.884|0.444	0	.
chr1	17788214	17788477	P0vsP39_P39_hypo_dmr_2362|5|0.900|0.504	0	.
chr1	17811532	17812021	P0vsP39_P39_hypo_dmr_2364|3|0.964|0.651	0	.
chr1	17838254	17838759	P0vsP39_P39_hypo_dmr_2367|8|0.518|0.168	0	.
chr1	17857834	17857869	P0vsP39_P39_hypo_dmr_2370|4|0.965|0.512	0	.
chr1	17873411	17873454	P0vsP39_P39_hypo_dmr_2371|3|0.734|0.393	0	.
chr1	17935502	17935563	P0vsP39_P39_hypo_dmr_2374|4|0.719|0.186	0	.
chr1	17949008	17949435	P0vsP39_P39_hypo_dmr_2375|4|0.855|0.346	0	.
chr1	18117601	18117803	P0vsP39_P39_hypo_dmr_2388|7|0.732|0.312	0	.
chr1	18319697	18320424	P0vsP39_P39_hypo_dmr_2406|4|0.905|0.553	0	.
chr1	18494855	18494930	P0vsP39_P39_hypo_dmr_2422|4|0.826|0.409	0	.
chr1	18536470	18537069	P0vsP39_P39_hypo_dmr_2429|12|0.781|0.238	0	.
chr1	18552845	18552878	P0vsP39_P39_hypo_dmr_2430|3|0.913|0.585	0	.
chr1	18578689	18579287	P0vsP39_P39_hypo_dmr_2432|10|0.916|0.299	0	.
chr1	18588530	18588604	P0vsP39_P39_hypo_dmr_2434|3|0.902|0.527	0	.
chr1	18589637	18589670	P0vsP39_P39_hypo_dmr_2435|3|0.814|0.311	0	.
chr1	18594741	18595140	P0vsP39_P39_hypo_dmr_2436|3|0.888|0.478	0	.
chr1	18608944	18609783	P0vsP39_P39_hypo_dmr_2439|5|0.885|0.578	0	.
chr1	18668133	18668849	P0vsP39_P39_hypo_dmr_2445|14|0.819|0.073	0	.
chr1	18765954	18766080	P0vsP39_P39_hypo_dmr_2453|5|0.811|0.437	0	.
chr1	18961743	18962858	P0vsP39_P39_hypo_dmr_2468|14|0.819|0.494	0	.
chr1	18972913	18973277	P0vsP39_P39_hypo_dmr_2471|15|0.903|0.502	0	.
chr1	19019924	19020329	P0vsP39_P39_hypo_dmr_2476|8|0.892|0.449	0	.
chr1	19046483	19047230	P0vsP39_P39_hypo_dmr_2479|6|0.676|0.361	0	.
chr1	19080190	19080501	P0vsP39_P39_hypo_dmr_2480|4|0.842|0.542	0	.
chr1	19459888	19460732	P0vsP39_P39_hypo_dmr_2519|26|0.866|0.555	0	.
chr1	19474394	19474671	P0vsP39_P39_hypo_dmr_2522|3|0.834|0.476	0	.
chr1	19590952	19591150	P0vsP39_P39_hypo_dmr_2534|3|0.929|0.599	0	.
chr1	19706573	19706906	P0vsP39_P39_hypo_dmr_2547|4|0.891|0.549	0	.
chr1	19716424	19716771	P0vsP39_P39_hypo_dmr_2550|7|0.838|0.526	0	.
chr1	19720398	19720884	P0vsP39_P39_hypo_dmr_2551|3|0.929|0.608	0	.
chr1	19786540	19787516	P0vsP39_P39_hypo_dmr_2559|10|0.881|0.507	0	.
chr1	19788437	19788617	P0vsP39_P39_hypo_dmr_2560|4|0.824|0.448	0	.
chr1	19838690	19838893	P0vsP39_P39_hypo_dmr_2565|3|0.967|0.635	0	.
chr1	19902158	19902338	P0vsP39_P39_hypo_dmr_2575|3|0.614|0.192	0	.
chr1	19906522	19906660	P0vsP39_P39_hypo_dmr_2576|3|0.807|0.485	0	.
chr1	19928919	19928927	P0vsP39_P39_hypo_dmr_2580|4|0.638|0.063	0	.
chr1	19974540	19974606	P0vsP39_P39_hypo_dmr_2588|4|0.807|0.313	0	.
chr1	19999644	20000257	P0vsP39_P39_hypo_dmr_2592|5|0.917|0.605	0	.
chr1	20010551	20010806	P0vsP39_P39_hypo_dmr_2593|6|0.800|0.258	0	.
chr1	20025748	20026107	P0vsP39_P39_hypo_dmr_2595|3|0.945|0.512	0	.
chr1	20135783	20136555	P0vsP39_P39_hypo_dmr_2608|13|0.844|0.399	0	.
chr1	20224572	20224597	P0vsP39_P39_hypo_dmr_2620|4|0.809|0.466	0	.
chr1	20352354	20352459	P0vsP39_P39_hypo_dmr_2640|4|0.822|0.158	0	.
chr1	20376017	20377009	P0vsP39_P39_hypo_dmr_2644|8|0.876|0.562	0	.
chr1	20456301	20456424	P0vsP39_P39_hypo_dmr_2652|5|0.795|0.363	0	.
chr1	20514336	20514479	P0vsP39_P39_hypo_dmr_2662|3|0.958|0.635	0	.
chr1	20620138	20621208	P0vsP39_P39_hypo_dmr_2674|16|0.723|0.247	0	.
chr1	20679676	20679688	P0vsP39_P39_hypo_dmr_2685|4|0.831|0.461	0	.
chr1	20700127	20700574	P0vsP39_P39_hypo_dmr_2691|3|0.710|0.363	0	.
chr1	20725394	20725893	P0vsP39_P39_hypo_dmr_2692|10|0.885|0.531	0	.
chr1	20749373	20749524	P0vsP39_P39_hypo_dmr_2696|5|0.657|0.163	0	.
chr1	20759684	20760385	P0vsP39_P39_hypo_dmr_2698|24|0.916|0.342	0	.
chr1	20775216	20775682	P0vsP39_P39_hypo_dmr_2701|7|0.752|0.428	0	.
chr1	20792637	20792742	P0vsP39_P39_hypo_dmr_2705|4|0.912|0.588	0	.
chr1	20848502	20849465	P0vsP39_P39_hypo_dmr_2716|11|0.903|0.501	0	.
chr1	20861993	20862328	P0vsP39_P39_hypo_dmr_2717|7|0.885|0.532	0	.
chr1	20873470	20875353	P0vsP39_P39_hypo_dmr_2720|30|0.897|0.517	0	.
chr1	20877829	20878054	P0vsP39_P39_hypo_dmr_2721|6|0.826|0.278	0	.
chr1	20941050	20941563	P0vsP39_P39_hypo_dmr_2742|5|0.674|0.366	0	.
chr1	20974506	20974584	P0vsP39_P39_hypo_dmr_2750|5|0.827|0.391	0	.
chr1	20981112	20982556	P0vsP39_P39_hypo_dmr_2752|36|0.851|0.361	0	.
chr1	21008608	21009595	P0vsP39_P39_hypo_dmr_2759|13|0.856|0.377	0	.
chr1	21013152	21013208	P0vsP39_P39_hypo_dmr_2761|7|0.933|0.585	0	.
chr1	21021209	21021416	P0vsP39_P39_hypo_dmr_2764|4|0.986|0.605	0	.
chr1	21027962	21028155	P0vsP39_P39_hypo_dmr_2766|10|0.840|0.421	0	.
chr1	21028664	21029547	P0vsP39_P39_hypo_dmr_2767|20|0.942|0.462	0	.
chr1	21075274	21075684	P0vsP39_P39_hypo_dmr_2779|8|0.811|0.493	0	.
chr1	21080199	21080207	P0vsP39_P39_hypo_dmr_2782|3|0.910|0.481	0	.
chr1	21101694	21101904	P0vsP39_P39_hypo_dmr_2785|10|0.564|0.113	0	.
chr1	21103186	21103820	P0vsP39_P39_hypo_dmr_2786|7|0.891|0.416	0	.
chr1	21133879	21134503	P0vsP39_P39_hypo_dmr_2791|8|0.789|0.376	0	.
chr1	21188423	21188543	P0vsP39_P39_hypo_dmr_2797|3|0.961|0.620	0	.
chr1	21189435	21189825	P0vsP39_P39_hypo_dmr_2798|11|0.901|0.434	0	.
chr1	21213887	21215419	P0vsP39_P39_hypo_dmr_2800|13|0.667|0.303	0	.
chr1	21219323	21220911	P0vsP39_P39_hypo_dmr_2801|18|0.769|0.403	0	.
chr1	21221503	21221730	P0vsP39_P39_hypo_dmr_2802|4|0.811|0.487	0	.
chr1	21231388	21231731	P0vsP39_P39_hypo_dmr_2804|4|0.831|0.476	0	.
chr1	21232336	21232909	P0vsP39_P39_hypo_dmr_2805|8|0.492|0.068	0	.
chr1	21269091	21269529	P0vsP39_P39_hypo_dmr_2808|6|0.830|0.454	0	.
chr1	21270476	21270611	P0vsP39_P39_hypo_dmr_2809|4|0.812|0.236	0	.
chr1	21273187	21273290	P0vsP39_P39_hypo_dmr_2811|5|0.947|0.631	0	.
chr1	21300952	21301032	P0vsP39_P39_hypo_dmr_2814|4|0.938|0.482	0	.
chr1	21408467	21408671	P0vsP39_P39_hypo_dmr_2828|3|0.973|0.636	0	.
chr1	21421437	21422045	P0vsP39_P39_hypo_dmr_2831|10|0.893|0.572	0	.
chr1	21424747	21424951	P0vsP39_P39_hypo_dmr_2833|6|0.929|0.610	0	.
chr1	21458741	21458976	P0vsP39_P39_hypo_dmr_2838|9|0.689|0.247	0	.
chr1	21470946	21471191	P0vsP39_P39_hypo_dmr_2844|8|0.951|0.475	0	.
chr1	21484751	21485211	P0vsP39_P39_hypo_dmr_2847|7|0.901|0.531	0	.
chr1	21496030	21497161	P0vsP39_P39_hypo_dmr_2850|10|0.899|0.394	0	.
chr1	21506355	21508814	P0vsP39_P39_hypo_dmr_2853|43|0.832|0.370	0	.
chr1	21539209	21539771	P0vsP39_P39_hypo_dmr_2857|8|0.908|0.416	0	.
chr1	21549828	21550109	P0vsP39_P39_hypo_dmr_2858|6|0.828|0.437	0	.
chr1	21552146	21553534	P0vsP39_P39_hypo_dmr_2859|11|0.935|0.450	0	.
chr1	21555689	21556125	P0vsP39_P39_hypo_dmr_2860|6|0.950|0.619	0	.
chr1	21573409	21573594	P0vsP39_P39_hypo_dmr_2861|7|0.980|0.659	0	.
chr1	21605368	21605557	P0vsP39_P39_hypo_dmr_2865|4|0.919|0.599	0	.
chr1	21608412	21608439	P0vsP39_P39_hypo_dmr_2868|4|0.856|0.107	0	.
chr1	21623397	21623705	P0vsP39_P39_hypo_dmr_2871|3|0.906|0.461	0	.
chr1	21631575	21632128	P0vsP39_P39_hypo_dmr_2874|7|0.889|0.532	0	.
chr1	21633096	21633344	P0vsP39_P39_hypo_dmr_2875|8|0.885|0.379	0	.
chr1	21650175	21650470	P0vsP39_P39_hypo_dmr_2878|4|0.789|0.470	0	.
chr1	21654307	21655074	P0vsP39_P39_hypo_dmr_2881|9|0.914|0.470	0	.
chr1	21676036	21677174	P0vsP39_P39_hypo_dmr_2888|16|0.813|0.384	0	.
chr1	21685121	21685228	P0vsP39_P39_hypo_dmr_2891|5|0.805|0.341	0	.
chr1	21715639	21716380	P0vsP39_P39_hypo_dmr_2897|9|0.912|0.509	0	.
chr1	21717832	21718156	P0vsP39_P39_hypo_dmr_2898|3|0.954|0.511	0	.
chr1	21720807	21721659	P0vsP39_P39_hypo_dmr_2899|3|0.777|0.464	0	.
chr1	21724856	21724981	P0vsP39_P39_hypo_dmr_2900|3|0.968|0.617	0	.
chr1	21737089	21737106	P0vsP39_P39_hypo_dmr_2901|4|0.852|0.493	0	.
chr1	21739772	21739950	P0vsP39_P39_hypo_dmr_2902|6|0.889|0.434	0	.
chr1	21751320	21751922	P0vsP39_P39_hypo_dmr_2905|8|0.850|0.442	0	.
chr1	21762384	21762526	P0vsP39_P39_hypo_dmr_2908|4|0.968|0.626	0	.
chr1	21764634	21765643	P0vsP39_P39_hypo_dmr_2910|6|0.923|0.605	0	.
chr1	21767857	21768027	P0vsP39_P39_hypo_dmr_2912|3|0.947|0.587	0	.
chr1	21770488	21771452	P0vsP39_P39_hypo_dmr_2913|11|0.878|0.509	0	.
chr1	21775786	21776287	P0vsP39_P39_hypo_dmr_2915|6|0.937|0.578	0	.
chr1	21783379	21783864	P0vsP39_P39_hypo_dmr_2916|6|0.887|0.375	0	.
chr1	21784759	21784810	P0vsP39_P39_hypo_dmr_2917|4|0.938|0.439	0	.
chr1	21837527	21838371	P0vsP39_P39_hypo_dmr_2929|7|0.892|0.509	0	.
chr1	21839990	21840021	P0vsP39_P39_hypo_dmr_2930|3|0.859|0.503	0	.
chr1	21847564	21847786	P0vsP39_P39_hypo_dmr_2934|3|0.922|0.619	0	.
chr1	21857916	21858760	P0vsP39_P39_hypo_dmr_2938|9|0.847|0.412	0	.
chr1	21885019	21885075	P0vsP39_P39_hypo_dmr_2942|3|0.778|0.376	0	.
chr1	21895386	21895897	P0vsP39_P39_hypo_dmr_2943|4|0.931|0.624	0	.
chr1	21900532	21901881	P0vsP39_P39_hypo_dmr_2945|7|0.882|0.573	0	.
chr1	21940493	21941211	P0vsP39_P39_hypo_dmr_2955|9|0.889|0.404	0	.
chr1	21941725	21942412	P0vsP39_P39_hypo_dmr_2956|20|0.847|0.413	0	.
chr1	21951531	21952435	P0vsP39_P39_hypo_dmr_2958|10|0.893|0.509	0	.
chr1	21957091	21958219	P0vsP39_P39_hypo_dmr_2959|17|0.779|0.314	0	.
chr1	21962778	21963765	P0vsP39_P39_hypo_dmr_2961|27|0.506|0.064	0	.
chr1	21967147	21967562	P0vsP39_P39_hypo_dmr_2962|7|0.601|0.296	0	.
chr1	22040081	22040588	P0vsP39_P39_hypo_dmr_2971|3|0.930|0.609	0	.
chr1	22085423	22085716	P0vsP39_P39_hypo_dmr_2975|5|0.925|0.609	0	.
chr1	22135814	22136944	P0vsP39_P39_hypo_dmr_2982|12|0.811|0.500	0	.
chr1	22191999	22192185	P0vsP39_P39_hypo_dmr_2986|5|0.484|0.180	0	.
chr1	22210391	22212095	P0vsP39_P39_hypo_dmr_2989|35|0.868|0.165	0	.
chr1	22222247	22222878	P0vsP39_P39_hypo_dmr_2991|12|0.759|0.244	0	.
chr1	22228727	22228736	P0vsP39_P39_hypo_dmr_2993|4|0.847|0.381	0	.
chr1	22246052	22246412	P0vsP39_P39_hypo_dmr_2994|6|0.621|0.225	0	.
chr1	22257294	22257588	P0vsP39_P39_hypo_dmr_2996|4|0.826|0.433	0	.
chr1	22259853	22261467	P0vsP39_P39_hypo_dmr_2998|24|0.832|0.466	0	.
chr1	22274187	22275914	P0vsP39_P39_hypo_dmr_3006|15|0.818|0.317	0	.
chr1	22299444	22299914	P0vsP39_P39_hypo_dmr_3014|6|0.849|0.365	0	.
chr1	22300693	22301180	P0vsP39_P39_hypo_dmr_3015|4|0.908|0.397	0	.
chr1	22301867	22302157	P0vsP39_P39_hypo_dmr_3016|6|0.859|0.322	0	.
chr1	22306611	22306869	P0vsP39_P39_hypo_dmr_3018|7|0.829|0.364	0	.
chr1	22307992	22308204	P0vsP39_P39_hypo_dmr_3019|12|0.845|0.286	0	.
chr1	22314297	22314620	P0vsP39_P39_hypo_dmr_3021|11|0.902|0.466	0	.
chr1	22325910	22326144	P0vsP39_P39_hypo_dmr_3026|3|0.931|0.619	0	.
chr1	22329976	22329989	P0vsP39_P39_hypo_dmr_3028|3|0.987|0.673	0	.
chr1	22337146	22337638	P0vsP39_P39_hypo_dmr_3031|5|0.875|0.462	0	.
chr1	22345139	22346134	P0vsP39_P39_hypo_dmr_3036|17|0.823|0.492	0	.
chr1	22359148	22359326	P0vsP39_P39_hypo_dmr_3040|3|0.920|0.603	0	.
chr1	22362258	22363023	P0vsP39_P39_hypo_dmr_3041|10|0.933|0.593	0	.
chr1	22365948	22366258	P0vsP39_P39_hypo_dmr_3042|8|0.959|0.437	0	.
chr1	22375700	22375742	P0vsP39_P39_hypo_dmr_3047|6|0.862|0.437	0	.
chr1	22403769	22404583	P0vsP39_P39_hypo_dmr_3057|12|0.897|0.561	0	.
chr1	22471383	22471760	P0vsP39_P39_hypo_dmr_3071|5|0.953|0.653	0	.
chr1	22501737	22502235	P0vsP39_P39_hypo_dmr_3080|8|0.829|0.339	0	.
chr1	22506976	22507470	P0vsP39_P39_hypo_dmr_3083|4|0.928|0.580	0	.
chr1	22509523	22510212	P0vsP39_P39_hypo_dmr_3084|3|0.798|0.443	0	.
chr1	22514192	22517764	P0vsP39_P39_hypo_dmr_3085|30|0.825|0.471	0	.
chr1	22520054	22520568	P0vsP39_P39_hypo_dmr_3086|4|0.906|0.564	0	.
chr1	22521454	22522401	P0vsP39_P39_hypo_dmr_3087|4|0.962|0.564	0	.
chr1	22531379	22532408	P0vsP39_P39_hypo_dmr_3089|5|0.940|0.630	0	.
chr1	22539419	22540049	P0vsP39_P39_hypo_dmr_3092|10|0.667|0.316	0	.
chr1	22543620	22543881	P0vsP39_P39_hypo_dmr_3093|4|0.939|0.559	0	.
chr1	22563530	22563561	P0vsP39_P39_hypo_dmr_3096|3|0.892|0.577	0	.
chr1	22573218	22573314	P0vsP39_P39_hypo_dmr_3097|7|0.973|0.641	0	.
chr1	22574622	22575012	P0vsP39_P39_hypo_dmr_3098|4|0.740|0.268	0	.
chr1	22582938	22583350	P0vsP39_P39_hypo_dmr_3101|7|0.845|0.326	0	.
chr1	22584237	22584379	P0vsP39_P39_hypo_dmr_3102|3|0.933|0.560	0	.
chr1	22584988	22585797	P0vsP39_P39_hypo_dmr_3103|7|0.857|0.445	0	.
chr1	22586453	22586694	P0vsP39_P39_hypo_dmr_3104|4|0.867|0.431	0	.
chr1	22603757	22604236	P0vsP39_P39_hypo_dmr_3109|5|0.867|0.542	0	.
chr1	22604740	22605275	P0vsP39_P39_hypo_dmr_3110|21|0.722|0.397	0	.
chr1	22609056	22609447	P0vsP39_P39_hypo_dmr_3111|6|0.906|0.565	0	.
chr1	22611837	22612961	P0vsP39_P39_hypo_dmr_3113|13|0.907|0.585	0	.
chr1	22616808	22617199	P0vsP39_P39_hypo_dmr_3115|9|0.885|0.459	0	.
chr1	22626407	22627958	P0vsP39_P39_hypo_dmr_3119|17|0.512|0.205	0	.
chr1	22629731	22629829	P0vsP39_P39_hypo_dmr_3121|3|0.947|0.395	0	.
chr1	22632041	22632902	P0vsP39_P39_hypo_dmr_3122|13|0.891|0.589	0	.
chr1	22639866	22640214	P0vsP39_P39_hypo_dmr_3126|5|0.891|0.435	0	.
chr1	22642784	22642841	P0vsP39_P39_hypo_dmr_3127|4|0.943|0.567	0	.
chr1	22650878	22651257	P0vsP39_P39_hypo_dmr_3128|3|0.921|0.600	0	.
chr1	22654474	22655958	P0vsP39_P39_hypo_dmr_3130|30|0.779|0.286	0	.
chr1	22656633	22657371	P0vsP39_P39_hypo_dmr_3131|7|0.871|0.463	0	.
chr1	22657937	22659649	P0vsP39_P39_hypo_dmr_3132|30|0.885|0.398	0	.
chr1	22661138	22664858	P0vsP39_P39_hypo_dmr_3133|43|0.862|0.355	0	.
chr1	22670387	22670568	P0vsP39_P39_hypo_dmr_3135|3|0.892|0.361	0	.
chr1	22683534	22684759	P0vsP39_P39_hypo_dmr_3140|12|0.820|0.316	0	.
chr1	22692778	22692881	P0vsP39_P39_hypo_dmr_3144|8|0.673|0.039	0	.
chr1	22693808	22694105	P0vsP39_P39_hypo_dmr_3145|10|0.922|0.460	0	.
chr1	22695754	22695887	P0vsP39_P39_hypo_dmr_3146|7|0.697|0.291	0	.
chr1	22697180	22698799	P0vsP39_P39_hypo_dmr_3147|35|0.865|0.487	0	.
chr1	22714160	22714950	P0vsP39_P39_hypo_dmr_3152|10|0.845|0.522	0	.
chr1	22718767	22720421	P0vsP39_P39_hypo_dmr_3154|17|0.901|0.518	0	.
chr1	22720954	22721633	P0vsP39_P39_hypo_dmr_3155|8|0.877|0.416	0	.
chr1	22726131	22728467	P0vsP39_P39_hypo_dmr_3156|34|0.839|0.376	0	.
chr1	22730011	22732325	P0vsP39_P39_hypo_dmr_3157|32|0.892|0.517	0	.
chr1	22732830	22733401	P0vsP39_P39_hypo_dmr_3158|7|0.864|0.402	0	.
chr1	22739230	22741115	P0vsP39_P39_hypo_dmr_3161|16|0.845|0.489	0	.
chr1	22748250	22749694	P0vsP39_P39_hypo_dmr_3165|24|0.932|0.554	0	.
chr1	22758610	22758913	P0vsP39_P39_hypo_dmr_3169|3|0.849|0.547	0	.
chr1	22759597	22762194	P0vsP39_P39_hypo_dmr_3170|26|0.926|0.620	0	.
chr1	22762905	22763671	P0vsP39_P39_hypo_dmr_3171|14|0.946|0.451	0	.
chr1	22764229	22764835	P0vsP39_P39_hypo_dmr_3172|17|0.903|0.549	0	.
chr1	22768296	22768915	P0vsP39_P39_hypo_dmr_3174|7|0.947|0.343	0	.
chr1	22772371	22772673	P0vsP39_P39_hypo_dmr_3176|4|0.952|0.632	0	.
chr1	22774142	22775449	P0vsP39_P39_hypo_dmr_3177|15|0.901|0.507	0	.
chr1	22780585	22780926	P0vsP39_P39_hypo_dmr_3179|4|0.871|0.511	0	.
chr1	22781686	22782957	P0vsP39_P39_hypo_dmr_3180|15|0.894|0.535	0	.
chr1	22783522	22783733	P0vsP39_P39_hypo_dmr_3181|9|0.944|0.586	0	.
chr1	22784236	22786321	P0vsP39_P39_hypo_dmr_3182|18|0.911|0.609	0	.
chr1	22793172	22795621	P0vsP39_P39_hypo_dmr_3184|25|0.895|0.513	0	.
chr1	22799670	22801790	P0vsP39_P39_hypo_dmr_3186|27|0.861|0.310	0	.
chr1	22802406	22803654	P0vsP39_P39_hypo_dmr_3187|20|0.839|0.236	0	.
chr1	22804534	22805260	P0vsP39_P39_hypo_dmr_3188|12|0.677|0.026	0	.
chr1	22830543	22830851	P0vsP39_P39_hypo_dmr_3192|6|0.786|0.274	0	.
chr1	22845552	22845680	P0vsP39_P39_hypo_dmr_3195|5|0.716|0.246	0	.
chr1	22846499	22846944	P0vsP39_P39_hypo_dmr_3196|5|0.931|0.581	0	.
chr1	22852381	22853570	P0vsP39_P39_hypo_dmr_3199|6|0.706|0.405	0	.
chr1	22883745	22884273	P0vsP39_P39_hypo_dmr_3203|7|0.654|0.101	0	.
chr1	22890016	22890280	P0vsP39_P39_hypo_dmr_3204|12|0.781|0.155	0	.
chr1	22894825	22895753	P0vsP39_P39_hypo_dmr_3207|20|0.880|0.374	0	.
chr1	22928466	22929257	P0vsP39_P39_hypo_dmr_3211|13|0.928|0.424	0	.
chr1	22939215	22940443	P0vsP39_P39_hypo_dmr_3213|25|0.920|0.299	0	.
chr1	22942649	22943900	P0vsP39_P39_hypo_dmr_3214|17|0.917|0.419	0	.
chr1	22944515	22945135	P0vsP39_P39_hypo_dmr_3215|5|0.898|0.526	0	.
chr1	22958983	22959374	P0vsP39_P39_hypo_dmr_3217|4|0.835|0.410	0	.
chr1	22961609	22962069	P0vsP39_P39_hypo_dmr_3218|7|0.714|0.373	0	.
chr1	22962715	22962829	P0vsP39_P39_hypo_dmr_3219|3|0.978|0.544	0	.
chr1	22969154	22969721	P0vsP39_P39_hypo_dmr_3222|7|0.823|0.314	0	.
chr1	22971350	22971692	P0vsP39_P39_hypo_dmr_3223|7|0.945|0.541	0	.
chr1	22975827	22976311	P0vsP39_P39_hypo_dmr_3225|9|0.970|0.547	0	.
chr1	22978017	22978176	P0vsP39_P39_hypo_dmr_3226|6|0.924|0.278	0	.
chr1	22980946	22981199	P0vsP39_P39_hypo_dmr_3227|8|0.911|0.362	0	.
chr1	23006446	23006801	P0vsP39_P39_hypo_dmr_3233|3|0.830|0.391	0	.
chr1	23016784	23016790	P0vsP39_P39_hypo_dmr_3234|4|0.991|0.687	0	.
chr1	23023755	23023847	P0vsP39_P39_hypo_dmr_3235|3|0.945|0.608	0	.
chr1	23050320	23050383	P0vsP39_P39_hypo_dmr_3240|6|0.933|0.596	0	.
chr1	23059907	23060539	P0vsP39_P39_hypo_dmr_3243|20|0.929|0.548	0	.
chr1	23063121	23064197	P0vsP39_P39_hypo_dmr_3244|16|0.856|0.551	0	.
chr1	23067804	23068095	P0vsP39_P39_hypo_dmr_3245|10|0.817|0.346	0	.
chr1	23094947	23095482	P0vsP39_P39_hypo_dmr_3249|4|0.926|0.558	0	.
chr1	23102780	23103567	P0vsP39_P39_hypo_dmr_3251|13|0.891|0.558	0	.
chr1	23128680	23129879	P0vsP39_P39_hypo_dmr_3256|9|0.945|0.619	0	.
chr1	23151815	23152272	P0vsP39_P39_hypo_dmr_3262|4|0.836|0.166	0	.
chr1	23208163	23208314	P0vsP39_P39_hypo_dmr_3278|4|0.894|0.347	0	.
chr1	23250486	23250947	P0vsP39_P39_hypo_dmr_3284|6|0.871|0.536	0	.
chr1	23263698	23264710	P0vsP39_P39_hypo_dmr_3286|13|0.586|0.185	0	.
chr1	23324007	23324359	P0vsP39_P39_hypo_dmr_3297|12|0.776|0.255	0	.
chr1	23344444	23344497	P0vsP39_P39_hypo_dmr_3304|4|0.537|0.017	0	.
chr1	23365921	23366420	P0vsP39_P39_hypo_dmr_3309|8|0.924|0.483	0	.
chr1	23367271	23368356	P0vsP39_P39_hypo_dmr_3310|14|0.821|0.458	0	.
chr1	23378218	23378227	P0vsP39_P39_hypo_dmr_3314|3|0.949|0.543	0	.
chr1	23380930	23381296	P0vsP39_P39_hypo_dmr_3315|7|0.760|0.388	0	.
chr1	23409624	23410436	P0vsP39_P39_hypo_dmr_3320|12|0.896|0.409	0	.
chr1	23462565	23462890	P0vsP39_P39_hypo_dmr_3328|6|0.735|0.356	0	.
chr1	23467140	23467890	P0vsP39_P39_hypo_dmr_3331|7|0.927|0.605	0	.
chr1	23495380	23495409	P0vsP39_P39_hypo_dmr_3336|5|0.717|0.233	0	.
chr1	23509970	23510210	P0vsP39_P39_hypo_dmr_3337|5|0.898|0.405	0	.
chr1	23557669	23558023	P0vsP39_P39_hypo_dmr_3347|3|0.899|0.537	0	.
chr1	23636697	23637027	P0vsP39_P39_hypo_dmr_3361|3|0.973|0.668	0	.
chr1	23650170	23650738	P0vsP39_P39_hypo_dmr_3364|8|0.815|0.439	0	.
chr1	23731118	23731682	P0vsP39_P39_hypo_dmr_3381|11|0.861|0.456	0	.
chr1	23775957	23777155	P0vsP39_P39_hypo_dmr_3391|19|0.742|0.408	0	.
chr1	23799724	23799795	P0vsP39_P39_hypo_dmr_3394|5|0.679|0.284	0	.
chr1	23825246	23825259	P0vsP39_P39_hypo_dmr_3399|3|0.857|0.510	0	.
chr1	23827525	23827542	P0vsP39_P39_hypo_dmr_3402|3|0.571|0.252	0	.
chr1	23851239	23851366	P0vsP39_P39_hypo_dmr_3412|3|0.718|0.203	0	.
chr1	23864180	23867491	P0vsP39_P39_hypo_dmr_3416|54|0.852|0.446	0	.
chr1	23867995	23868478	P0vsP39_P39_hypo_dmr_3417|8|0.938|0.418	0	.
chr1	23878765	23879613	P0vsP39_P39_hypo_dmr_3421|11|0.870|0.558	0	.
chr1	23880784	23881573	P0vsP39_P39_hypo_dmr_3422|4|0.930|0.622	0	.
chr1	23893447	23894357	P0vsP39_P39_hypo_dmr_3425|9|0.821|0.509	0	.
chr1	23898912	23899114	P0vsP39_P39_hypo_dmr_3426|5|0.839|0.441	0	.
chr1	23903892	23904635	P0vsP39_P39_hypo_dmr_3429|10|0.880|0.443	0	.
chr1	23908454	23908949	P0vsP39_P39_hypo_dmr_3431|8|0.947|0.584	0	.
chr1	23909666	23910565	P0vsP39_P39_hypo_dmr_3432|12|0.816|0.464	0	.
chr1	23911136	23912236	P0vsP39_P39_hypo_dmr_3433|14|0.933|0.427	0	.
chr1	23914776	23914804	P0vsP39_P39_hypo_dmr_3435|4|0.968|0.668	0	.
chr1	23917522	23919599	P0vsP39_P39_hypo_dmr_3437|33|0.893|0.499	0	.
chr1	23920927	23921575	P0vsP39_P39_hypo_dmr_3438|11|0.605|0.091	0	.
chr1	23928186	23928701	P0vsP39_P39_hypo_dmr_3442|14|0.833|0.213	0	.
chr1	23929414	23929874	P0vsP39_P39_hypo_dmr_3443|11|0.916|0.524	0	.
chr1	23933068	23933619	P0vsP39_P39_hypo_dmr_3445|5|0.812|0.371	0	.
chr1	23934572	23935055	P0vsP39_P39_hypo_dmr_3446|13|0.616|0.285	0	.
chr1	23935797	23935950	P0vsP39_P39_hypo_dmr_3447|3|0.777|0.443	0	.
chr1	23942920	23943021	P0vsP39_P39_hypo_dmr_3448|3|0.913|0.518	0	.
chr1	23943685	23944128	P0vsP39_P39_hypo_dmr_3449|7|0.727|0.223	0	.
chr1	23978096	23978696	P0vsP39_P39_hypo_dmr_3458|14|0.461|0.099	0	.
chr1	23981885	23982294	P0vsP39_P39_hypo_dmr_3459|3|0.933|0.609	0	.
chr1	23985006	23985127	P0vsP39_P39_hypo_dmr_3460|7|0.906|0.528	0	.
chr1	23985998	23986513	P0vsP39_P39_hypo_dmr_3461|8|0.955|0.539	0	.
chr1	23989266	23989754	P0vsP39_P39_hypo_dmr_3462|11|0.659|0.337	0	.
chr1	24021105	24021213	P0vsP39_P39_hypo_dmr_3472|5|0.777|0.337	0	.
chr1	24033493	24033969	P0vsP39_P39_hypo_dmr_3479|5|0.867|0.377	0	.
chr1	24092639	24093050	P0vsP39_P39_hypo_dmr_3493|9|0.915|0.506	0	.
chr1	24094082	24095122	P0vsP39_P39_hypo_dmr_3494|13|0.772|0.261	0	.
chr1	24096246	24097548	P0vsP39_P39_hypo_dmr_3495|16|0.807|0.392	0	.
chr1	24101340	24101493	P0vsP39_P39_hypo_dmr_3497|6|0.788|0.215	0	.
chr1	24112219	24112386	P0vsP39_P39_hypo_dmr_3500|6|0.881|0.391	0	.
chr1	24116161	24116373	P0vsP39_P39_hypo_dmr_3501|3|0.621|0.218	0	.
chr1	24128543	24128603	P0vsP39_P39_hypo_dmr_3506|8|0.788|0.158	0	.
chr1	24137073	24137092	P0vsP39_P39_hypo_dmr_3509|3|0.607|0.205	0	.
chr1	24138138	24138162	P0vsP39_P39_hypo_dmr_3510|4|0.838|0.428	0	.
chr1	24189133	24189307	P0vsP39_P39_hypo_dmr_3524|7|0.920|0.512	0	.
chr1	24227519	24227979	P0vsP39_P39_hypo_dmr_3532|7|0.598|0.072	0	.
chr1	24228535	24229383	P0vsP39_P39_hypo_dmr_3533|9|0.939|0.603	0	.
chr1	24237581	24238279	P0vsP39_P39_hypo_dmr_3538|19|0.555|0.156	0	.
chr1	24241819	24242038	P0vsP39_P39_hypo_dmr_3540|12|0.751|0.234	0	.
chr1	24268874	24269714	P0vsP39_P39_hypo_dmr_3551|6|0.780|0.417	0	.
chr1	24299907	24300033	P0vsP39_P39_hypo_dmr_3560|6|0.835|0.255	0	.
chr1	24336023	24336317	P0vsP39_P39_hypo_dmr_3572|5|0.739|0.233	0	.
chr1	24349341	24350810	P0vsP39_P39_hypo_dmr_3573|23|0.855|0.538	0	.
chr1	24364545	24364967	P0vsP39_P39_hypo_dmr_3576|18|0.891|0.363	0	.
chr1	24387029	24387173	P0vsP39_P39_hypo_dmr_3582|3|0.846|0.388	0	.
chr1	24439411	24439813	P0vsP39_P39_hypo_dmr_3591|3|0.876|0.456	0	.
chr1	24462434	24462865	P0vsP39_P39_hypo_dmr_3596|3|0.849|0.411	0	.
chr1	24509880	24510301	P0vsP39_P39_hypo_dmr_3603|5|0.885|0.536	0	.
chr1	24526952	24527691	P0vsP39_P39_hypo_dmr_3607|9|0.812|0.436	0	.
chr1	24529794	24529868	P0vsP39_P39_hypo_dmr_3608|4|0.904|0.216	0	.
chr1	24551565	24552334	P0vsP39_P39_hypo_dmr_3613|12|0.811|0.459	0	.
chr1	24558026	24558085	P0vsP39_P39_hypo_dmr_3615|4|0.765|0.393	0	.
chr1	24578535	24578573	P0vsP39_P39_hypo_dmr_3619|6|0.680|0.221	0	.
chr1	24587735	24587941	P0vsP39_P39_hypo_dmr_3622|7|0.599|0.133	0	.
chr1	24616997	24617240	P0vsP39_P39_hypo_dmr_3627|4|0.560|0.155	0	.
chr1	24634166	24634344	P0vsP39_P39_hypo_dmr_3630|6|0.862|0.553	0	.
chr1	24638116	24638605	P0vsP39_P39_hypo_dmr_3631|7|0.925|0.507	0	.
chr1	24660168	24660645	P0vsP39_P39_hypo_dmr_3633|3|0.851|0.308	0	.
chr1	24661254	24662312	P0vsP39_P39_hypo_dmr_3634|11|0.872|0.225	0	.
chr1	24663290	24665388	P0vsP39_P39_hypo_dmr_3635|23|0.878|0.540	0	.
chr1	24666516	24666886	P0vsP39_P39_hypo_dmr_3636|4|0.875|0.511	0	.
chr1	24673378	24678043	P0vsP39_P39_hypo_dmr_3638|72|0.803|0.417	0	.
chr1	24679503	24681510	P0vsP39_P39_hypo_dmr_3639|34|0.863|0.520	0	.
chr1	24683349	24683717	P0vsP39_P39_hypo_dmr_3641|8|0.890|0.494	0	.
chr1	24703567	24704036	P0vsP39_P39_hypo_dmr_3652|12|0.635|0.130	0	.
chr1	24716430	24716562	P0vsP39_P39_hypo_dmr_3658|6|0.965|0.547	0	.
chr1	24719111	24719536	P0vsP39_P39_hypo_dmr_3660|6|0.822|0.460	0	.
chr1	24734808	24735084	P0vsP39_P39_hypo_dmr_3662|10|0.881|0.537	0	.
chr1	24738018	24739715	P0vsP39_P39_hypo_dmr_3663|30|0.927|0.517	0	.
chr1	24740507	24740752	P0vsP39_P39_hypo_dmr_3664|3|0.934|0.631	0	.
chr1	24744923	24745340	P0vsP39_P39_hypo_dmr_3667|6|0.930|0.630	0	.
chr1	24756581	24756847	P0vsP39_P39_hypo_dmr_3672|3|0.865|0.547	0	.
chr1	24770857	24771627	P0vsP39_P39_hypo_dmr_3679|13|0.893|0.329	0	.
chr1	24787409	24787459	P0vsP39_P39_hypo_dmr_3685|4|0.910|0.523	0	.
chr1	24791148	24791399	P0vsP39_P39_hypo_dmr_3688|3|0.472|0.149	0	.
chr1	24794136	24795560	P0vsP39_P39_hypo_dmr_3689|23|0.925|0.576	0	.
chr1	24837899	24838092	P0vsP39_P39_hypo_dmr_3696|3|0.966|0.345	0	.
chr1	24841857	24842099	P0vsP39_P39_hypo_dmr_3697|3|0.965|0.653	0	.
chr1	24874478	24874546	P0vsP39_P39_hypo_dmr_3704|3|0.857|0.432	0	.
chr1	24971677	24971777	P0vsP39_P39_hypo_dmr_3725|3|0.918|0.581	0	.
chr1	24990426	24990502	P0vsP39_P39_hypo_dmr_3726|3|0.936|0.604	0	.
chr1	24999813	25000873	P0vsP39_P39_hypo_dmr_3728|22|0.771|0.395	0	.
chr1	25021153	25021727	P0vsP39_P39_hypo_dmr_3734|8|0.885|0.579	0	.
chr1	25038360	25038472	P0vsP39_P39_hypo_dmr_3739|3|0.915|0.507	0	.
chr1	25043193	25044321	P0vsP39_P39_hypo_dmr_3741|11|0.814|0.436	0	.
chr1	25053563	25055105	P0vsP39_P39_hypo_dmr_3745|26|0.884|0.541	0	.
chr1	25062612	25063815	P0vsP39_P39_hypo_dmr_3748|13|0.883|0.489	0	.
chr1	25079775	25080518	P0vsP39_P39_hypo_dmr_3758|13|0.888|0.456	0	.
chr1	25083871	25085444	P0vsP39_P39_hypo_dmr_3760|30|0.668|0.319	0	.
chr1	25089756	25092268	P0vsP39_P39_hypo_dmr_3763|21|0.880|0.554	0	.
chr1	25096287	25096531	P0vsP39_P39_hypo_dmr_3765|8|0.845|0.289	0	.
chr1	25098510	25100453	P0vsP39_P39_hypo_dmr_3766|22|0.871|0.485	0	.
chr1	25103219	25105040	P0vsP39_P39_hypo_dmr_3768|26|0.819|0.365	0	.
chr1	25105726	25106784	P0vsP39_P39_hypo_dmr_3769|20|0.457|0.114	0	.
chr1	25108240	25109751	P0vsP39_P39_hypo_dmr_3770|15|0.618|0.314	0	.
chr1	25110306	25111514	P0vsP39_P39_hypo_dmr_3771|22|0.835|0.372	0	.
chr1	25112245	25112435	P0vsP39_P39_hypo_dmr_3772|6|0.605|0.240	0	.
chr1	25118736	25119782	P0vsP39_P39_hypo_dmr_3775|7|0.910|0.533	0	.
chr1	25126624	25127417	P0vsP39_P39_hypo_dmr_3776|20|0.850|0.459	0	.
chr1	25128054	25129538	P0vsP39_P39_hypo_dmr_3777|18|0.925|0.613	0	.
chr1	25131487	25132057	P0vsP39_P39_hypo_dmr_3780|5|0.569|0.258	0	.
chr1	25143578	25144578	P0vsP39_P39_hypo_dmr_3783|12|0.932|0.576	0	.
chr1	25145707	25146907	P0vsP39_P39_hypo_dmr_3784|14|0.851|0.383	0	.
chr1	25148098	25148367	P0vsP39_P39_hypo_dmr_3785|5|0.948|0.628	0	.
chr1	25149583	25152466	P0vsP39_P39_hypo_dmr_3786|27|0.870|0.544	0	.
chr1	25154860	25155926	P0vsP39_P39_hypo_dmr_3787|8|0.710|0.259	0	.
chr1	25165495	25165661	P0vsP39_P39_hypo_dmr_3791|6|0.715|0.361	0	.
chr1	25166925	25167990	P0vsP39_P39_hypo_dmr_3792|21|0.622|0.097	0	.
chr1	25168624	25170078	P0vsP39_P39_hypo_dmr_3793|13|0.898|0.505	0	.
chr1	25171611	25173187	P0vsP39_P39_hypo_dmr_3795|13|0.934|0.566	0	.
chr1	25174092	25175599	P0vsP39_P39_hypo_dmr_3796|14|0.671|0.305	0	.
chr1	25176572	25178292	P0vsP39_P39_hypo_dmr_3797|27|0.682|0.360	0	.
chr1	25181405	25183295	P0vsP39_P39_hypo_dmr_3799|14|0.866|0.470	0	.
chr1	25188080	25188144	P0vsP39_P39_hypo_dmr_3800|3|0.836|0.460	0	.
chr1	25193232	25193429	P0vsP39_P39_hypo_dmr_3803|4|0.941|0.578	0	.
chr1	25197272	25198143	P0vsP39_P39_hypo_dmr_3805|6|0.952|0.585	0	.
chr1	25200002	25200231	P0vsP39_P39_hypo_dmr_3806|5|0.914|0.345	0	.
chr1	25200767	25201230	P0vsP39_P39_hypo_dmr_3807|5|0.901|0.534	0	.
chr1	25201800	25201984	P0vsP39_P39_hypo_dmr_3808|3|0.828|0.356	0	.
chr1	25208282	25208784	P0vsP39_P39_hypo_dmr_3810|6|0.949|0.522	0	.
chr1	25211328	25211527	P0vsP39_P39_hypo_dmr_3812|3|0.592|0.266	0	.
chr1	25214206	25215205	P0vsP39_P39_hypo_dmr_3814|9|0.890|0.562	0	.
chr1	25217093	25217485	P0vsP39_P39_hypo_dmr_3815|5|0.916|0.397	0	.
chr1	25225193	25225774	P0vsP39_P39_hypo_dmr_3818|5|0.943|0.546	0	.
chr1	25226501	25227103	P0vsP39_P39_hypo_dmr_3819|6|0.740|0.210	0	.
chr1	25227680	25227958	P0vsP39_P39_hypo_dmr_3820|4|0.583|0.032	0	.
chr1	25267444	25270159	P0vsP39_P39_hypo_dmr_3833|34|0.796|0.352	0	.
chr1	25296857	25297154	P0vsP39_P39_hypo_dmr_3842|5|0.911|0.499	0	.
chr1	25301069	25301758	P0vsP39_P39_hypo_dmr_3844|9|0.883|0.582	0	.
chr1	25313181	25314305	P0vsP39_P39_hypo_dmr_3848|7|0.900|0.544	0	.
chr1	25318353	25319734	P0vsP39_P39_hypo_dmr_3849|16|0.888|0.444	0	.
chr1	25324078	25324975	P0vsP39_P39_hypo_dmr_3850|8|0.825|0.525	0	.
chr1	25356919	25358922	P0vsP39_P39_hypo_dmr_3859|17|0.935|0.471	0	.
chr1	25367641	25368023	P0vsP39_P39_hypo_dmr_3862|3|0.917|0.508	0	.
chr1	25368561	25369085	P0vsP39_P39_hypo_dmr_3863|6|0.863|0.526	0	.
chr1	25376748	25377715	P0vsP39_P39_hypo_dmr_3866|22|0.898|0.423	0	.
chr1	25378298	25378906	P0vsP39_P39_hypo_dmr_3867|9|0.941|0.540	0	.
chr1	25389975	25390107	P0vsP39_P39_hypo_dmr_3870|3|0.796|0.410	0	.
chr1	25412720	25413089	P0vsP39_P39_hypo_dmr_3878|3|0.920|0.537	0	.
chr1	25435928	25435932	P0vsP39_P39_hypo_dmr_3888|4|0.936|0.175	0	.
chr1	25443293	25444767	P0vsP39_P39_hypo_dmr_3892|21|0.735|0.327	0	.
chr1	25447700	25448184	P0vsP39_P39_hypo_dmr_3893|9|0.885|0.553	0	.
chr1	25448780	25450709	P0vsP39_P39_hypo_dmr_3894|18|0.907|0.463	0	.
chr1	25475710	25475956	P0vsP39_P39_hypo_dmr_3904|5|0.751|0.205	0	.
chr1	25490042	25490668	P0vsP39_P39_hypo_dmr_3909|8|0.671|0.123	0	.
chr1	25496321	25496574	P0vsP39_P39_hypo_dmr_3910|3|0.971|0.594	0	.
chr1	25514941	25515574	P0vsP39_P39_hypo_dmr_3915|10|0.842|0.437	0	.
chr1	25518314	25518509	P0vsP39_P39_hypo_dmr_3917|3|0.920|0.530	0	.
chr1	25535112	25535331	P0vsP39_P39_hypo_dmr_3922|4|0.948|0.633	0	.
chr1	25538938	25539080	P0vsP39_P39_hypo_dmr_3923|4|0.543|0.157	0	.
chr1	25543009	25543806	P0vsP39_P39_hypo_dmr_3925|16|0.659|0.158	0	.
chr1	25555883	25555891	P0vsP39_P39_hypo_dmr_3928|3|0.950|0.534	0	.
chr1	25559490	25559899	P0vsP39_P39_hypo_dmr_3929|6|0.890|0.561	0	.
chr1	25570371	25571458	P0vsP39_P39_hypo_dmr_3931|9|0.879|0.476	0	.
chr1	25574974	25575650	P0vsP39_P39_hypo_dmr_3933|9|0.958|0.559	0	.
chr1	25576590	25577901	P0vsP39_P39_hypo_dmr_3934|19|0.773|0.383	0	.
chr1	25579208	25579900	P0vsP39_P39_hypo_dmr_3935|9|0.804|0.469	0	.
chr1	25583721	25584258	P0vsP39_P39_hypo_dmr_3937|4|0.904|0.597	0	.
chr1	25599010	25600312	P0vsP39_P39_hypo_dmr_3941|40|0.841|0.288	0	.
chr1	25609397	25609443	P0vsP39_P39_hypo_dmr_3943|3|0.833|0.483	0	.
chr1	25613712	25614382	P0vsP39_P39_hypo_dmr_3945|6|0.780|0.265	0	.
chr1	25621857	25623993	P0vsP39_P39_hypo_dmr_3947|16|0.716|0.327	0	.
chr1	25636320	25637608	P0vsP39_P39_hypo_dmr_3951|14|0.920|0.571	0	.
chr1	25642629	25642854	P0vsP39_P39_hypo_dmr_3953|3|0.926|0.602	0	.
chr1	25647168	25647473	P0vsP39_P39_hypo_dmr_3955|3|0.867|0.480	0	.
chr1	25651015	25652102	P0vsP39_P39_hypo_dmr_3957|7|0.959|0.586	0	.
chr1	25654167	25654533	P0vsP39_P39_hypo_dmr_3958|3|0.953|0.589	0	.
chr1	25657030	25658863	P0vsP39_P39_hypo_dmr_3960|24|0.845|0.251	0	.
chr1	25661861	25662069	P0vsP39_P39_hypo_dmr_3961|5|0.721|0.256	0	.
chr1	25672120	25672526	P0vsP39_P39_hypo_dmr_3963|5|0.808|0.397	0	.
chr1	25681893	25685695	P0vsP39_P39_hypo_dmr_3966|36|0.723|0.340	0	.
chr1	25691676	25693075	P0vsP39_P39_hypo_dmr_3968|18|0.924|0.538	0	.
chr1	25706001	25706225	P0vsP39_P39_hypo_dmr_3974|4|0.933|0.615	0	.
chr1	25709160	25710052	P0vsP39_P39_hypo_dmr_3975|9|0.796|0.332	0	.
chr1	25711271	25712145	P0vsP39_P39_hypo_dmr_3976|9|0.692|0.296	0	.
chr1	25732731	25733365	P0vsP39_P39_hypo_dmr_3981|5|0.899|0.594	0	.
chr1	25733922	25734316	P0vsP39_P39_hypo_dmr_3982|7|0.885|0.526	0	.
chr1	25736851	25737203	P0vsP39_P39_hypo_dmr_3983|3|0.939|0.361	0	.
chr1	25741010	25741481	P0vsP39_P39_hypo_dmr_3984|5|0.848|0.358	0	.
chr1	25748912	25749061	P0vsP39_P39_hypo_dmr_3985|3|0.936|0.623	0	.
chr1	25749637	25749858	P0vsP39_P39_hypo_dmr_3986|5|0.862|0.525	0	.
chr1	25758283	25758713	P0vsP39_P39_hypo_dmr_3989|8|0.942|0.424	0	.
chr1	25762817	25763256	P0vsP39_P39_hypo_dmr_3991|8|0.835|0.430	0	.
chr1	25778515	25779346	P0vsP39_P39_hypo_dmr_3994|8|0.877|0.563	0	.
chr1	25780289	25780437	P0vsP39_P39_hypo_dmr_3995|3|0.904|0.581	0	.
chr1	25783780	25783945	P0vsP39_P39_hypo_dmr_3997|6|0.728|0.155	0	.
chr1	25784464	25784816	P0vsP39_P39_hypo_dmr_3998|11|0.681|0.305	0	.
chr1	25788652	25790124	P0vsP39_P39_hypo_dmr_4000|11|0.914|0.577	0	.
chr1	25792467	25793318	P0vsP39_P39_hypo_dmr_4002|11|0.778|0.463	0	.
chr1	25796502	25796511	P0vsP39_P39_hypo_dmr_4004|3|0.982|0.678	0	.
chr1	25797245	25798708	P0vsP39_P39_hypo_dmr_4005|12|0.957|0.572	0	.
chr1	25810938	25811302	P0vsP39_P39_hypo_dmr_4012|5|0.941|0.639	0	.
chr1	25814855	25817115	P0vsP39_P39_hypo_dmr_4016|23|0.931|0.605	0	.
chr1	25823077	25824417	P0vsP39_P39_hypo_dmr_4019|30|0.593|0.172	0	.
chr1	25826082	25827811	P0vsP39_P39_hypo_dmr_4020|42|0.428|0.033	0	.
chr1	25832998	25833249	P0vsP39_P39_hypo_dmr_4024|3|0.843|0.494	0	.
chr1	25856402	25856604	P0vsP39_P39_hypo_dmr_4028|4|0.676|0.191	0	.
chr1	25857396	25857637	P0vsP39_P39_hypo_dmr_4029|4|0.770|0.206	0	.
chr1	25877017	25877800	P0vsP39_P39_hypo_dmr_4031|13|0.640|0.256	0	.
chr1	25901433	25901666	P0vsP39_P39_hypo_dmr_4034|3|0.852|0.455	0	.
chr1	25963923	25964927	P0vsP39_P39_hypo_dmr_4041|11|0.932|0.483	0	.
chr1	25998841	25999159	P0vsP39_P39_hypo_dmr_4044|3|0.829|0.494	0	.
chr1	26053596	26053659	P0vsP39_P39_hypo_dmr_4049|3|0.899|0.518	0	.
chr1	26098802	26099268	P0vsP39_P39_hypo_dmr_4052|3|0.894|0.582	0	.
chr1	26114237	26114248	P0vsP39_P39_hypo_dmr_4054|4|0.967|0.471	0	.
chr1	26161136	26161295	P0vsP39_P39_hypo_dmr_4057|3|0.898|0.566	0	.
chr1	26186899	26187282	P0vsP39_P39_hypo_dmr_4061|5|0.843|0.376	0	.
chr1	26196844	26197352	P0vsP39_P39_hypo_dmr_4063|3|0.897|0.529	0	.
chr1	26204796	26205038	P0vsP39_P39_hypo_dmr_4066|3|0.791|0.424	0	.
chr1	26243946	26244281	P0vsP39_P39_hypo_dmr_4069|3|0.923|0.527	0	.
chr1	26276265	26276581	P0vsP39_P39_hypo_dmr_4072|8|0.929|0.551	0	.
chr1	26277123	26277316	P0vsP39_P39_hypo_dmr_4073|6|0.957|0.355	0	.
chr1	26278539	26279029	P0vsP39_P39_hypo_dmr_4074|3|0.859|0.503	0	.
chr1	26281791	26282677	P0vsP39_P39_hypo_dmr_4075|6|0.792|0.402	0	.
chr1	26289533	26289675	P0vsP39_P39_hypo_dmr_4077|4|0.602|0.233	0	.
chr1	26290845	26291161	P0vsP39_P39_hypo_dmr_4078|3|0.696|0.382	0	.
chr1	26321183	26321450	P0vsP39_P39_hypo_dmr_4081|6|0.844|0.331	0	.
chr1	26337354	26337700	P0vsP39_P39_hypo_dmr_4084|3|0.912|0.604	0	.
chr1	26348121	26348346	P0vsP39_P39_hypo_dmr_4086|4|0.858|0.485	0	.
chr1	26363213	26363431	P0vsP39_P39_hypo_dmr_4088|4|0.938|0.501	0	.
chr1	26403969	26404091	P0vsP39_P39_hypo_dmr_4095|6|0.680|0.116	0	.
chr1	26404782	26405860	P0vsP39_P39_hypo_dmr_4096|14|0.928|0.508	0	.
chr1	26408010	26408281	P0vsP39_P39_hypo_dmr_4098|3|0.923|0.586	0	.
chr1	26424183	26424189	P0vsP39_P39_hypo_dmr_4100|4|0.952|0.518	0	.
chr1	26426726	26427099	P0vsP39_P39_hypo_dmr_4102|8|0.773|0.292	0	.
chr1	26476212	26476542	P0vsP39_P39_hypo_dmr_4103|4|0.935|0.559	0	.
chr1	26505810	26505968	P0vsP39_P39_hypo_dmr_4106|3|0.933|0.630	0	.
chr1	26520564	26520925	P0vsP39_P39_hypo_dmr_4109|3|0.909|0.509	0	.
chr1	26559930	26560148	P0vsP39_P39_hypo_dmr_4111|4|0.771|0.252	0	.
chr1	26583266	26583972	P0vsP39_P39_hypo_dmr_4114|8|0.872|0.366	0	.
chr1	26644282	26644493	P0vsP39_P39_hypo_dmr_4120|3|0.985|0.684	0	.
chr1	26659558	26659698	P0vsP39_P39_hypo_dmr_4122|6|0.878|0.380	0	.
chr1	26723757	26724062	P0vsP39_P39_hypo_dmr_4126|5|0.812|0.457	0	.
chr1	26765505	26765731	P0vsP39_P39_hypo_dmr_4133|3|0.773|0.387	0	.
chr1	26780887	26781252	P0vsP39_P39_hypo_dmr_4137|8|0.579|0.250	0	.
chr1	26785152	26785239	P0vsP39_P39_hypo_dmr_4138|5|0.811|0.376	0	.
chr1	26816595	26816889	P0vsP39_P39_hypo_dmr_4140|3|0.949|0.495	0	.
chr1	26851792	26851926	P0vsP39_P39_hypo_dmr_4142|3|0.946|0.643	0	.
chr1	26910960	26911057	P0vsP39_P39_hypo_dmr_4148|4|0.940|0.588	0	.
chr1	26913903	26914411	P0vsP39_P39_hypo_dmr_4149|3|0.910|0.595	0	.
chr1	26941410	26942081	P0vsP39_P39_hypo_dmr_4150|3|0.926|0.557	0	.
chr1	26944309	26944701	P0vsP39_P39_hypo_dmr_4152|3|0.891|0.329	0	.
chr1	27048243	27048523	P0vsP39_P39_hypo_dmr_4155|4|0.862|0.155	0	.
chr1	27108729	27108824	P0vsP39_P39_hypo_dmr_4159|4|0.912|0.307	0	.
chr1	27110529	27111000	P0vsP39_P39_hypo_dmr_4160|10|0.871|0.335	0	.
chr1	27117845	27118342	P0vsP39_P39_hypo_dmr_4161|5|0.855|0.315	0	.
chr1	27127140	27127251	P0vsP39_P39_hypo_dmr_4162|5|0.928|0.382	0	.
chr1	27155972	27156363	P0vsP39_P39_hypo_dmr_4163|3|0.975|0.654	0	.
chr1	27217394	27217410	P0vsP39_P39_hypo_dmr_4166|3|0.966|0.584	0	.
chr1	27235221	27235711	P0vsP39_P39_hypo_dmr_4168|3|0.849|0.434	0	.
chr1	27247755	27248498	P0vsP39_P39_hypo_dmr_4169|8|0.885|0.463	0	.
chr1	27298711	27299134	P0vsP39_P39_hypo_dmr_4172|4|0.547|0.041	0	.
chr1	27303301	27304814	P0vsP39_P39_hypo_dmr_4173|10|0.886|0.531	0	.
chr1	27306922	27307635	P0vsP39_P39_hypo_dmr_4174|10|0.772|0.350	0	.
chr1	27459319	27459859	P0vsP39_P39_hypo_dmr_4183|9|0.909|0.386	0	.
chr1	27476892	27477492	P0vsP39_P39_hypo_dmr_4186|6|0.826|0.364	0	.
chr1	27478027	27478796	P0vsP39_P39_hypo_dmr_4187|4|0.848|0.479	0	.
chr1	27506140	27506482	P0vsP39_P39_hypo_dmr_4190|3|0.975|0.635	0	.
chr1	27538945	27539014	P0vsP39_P39_hypo_dmr_4195|4|0.896|0.379	0	.
chr1	27559862	27560090	P0vsP39_P39_hypo_dmr_4196|5|0.865|0.349	0	.
chr1	27607820	27609450	P0vsP39_P39_hypo_dmr_4197|30|0.621|0.166	0	.
chr1	27610277	27610515	P0vsP39_P39_hypo_dmr_4198|3|0.906|0.427	0	.
chr1	27619693	27619943	P0vsP39_P39_hypo_dmr_4201|3|0.839|0.490	0	.
chr1	27627045	27627368	P0vsP39_P39_hypo_dmr_4202|3|0.705|0.317	0	.
chr1	27634265	27634310	P0vsP39_P39_hypo_dmr_4203|3|0.955|0.594	0	.
chr1	27657441	27657470	P0vsP39_P39_hypo_dmr_4204|4|0.901|0.431	0	.
chr1	27696041	27696186	P0vsP39_P39_hypo_dmr_4207|6|0.902|0.391	0	.
chr1	27722398	27722647	P0vsP39_P39_hypo_dmr_4209|4|0.840|0.132	0	.
chr1	27916029	27916417	P0vsP39_P39_hypo_dmr_4215|7|0.906|0.580	0	.
chr1	27933525	27933946	P0vsP39_P39_hypo_dmr_4218|3|0.915|0.609	0	.
chr1	28004251	28004407	P0vsP39_P39_hypo_dmr_4223|4|0.862|0.328	0	.
chr1	28093929	28094372	P0vsP39_P39_hypo_dmr_4233|4|0.876|0.500	0	.
chr1	28100264	28100273	P0vsP39_P39_hypo_dmr_4234|3|0.899|0.554	0	.
chr1	28101471	28102176	P0vsP39_P39_hypo_dmr_4235|10|0.809|0.374	0	.
chr1	28122982	28123026	P0vsP39_P39_hypo_dmr_4239|4|0.894|0.442	0	.
chr1	28328585	28328819	P0vsP39_P39_hypo_dmr_4249|7|0.927|0.429	0	.
chr1	28362430	28362629	P0vsP39_P39_hypo_dmr_4255|3|0.909|0.531	0	.
chr1	28373706	28373850	P0vsP39_P39_hypo_dmr_4256|7|0.475|0.079	0	.
chr1	28452363	28453600	P0vsP39_P39_hypo_dmr_4262|11|0.903|0.579	0	.
chr1	28513310	28513314	P0vsP39_P39_hypo_dmr_4267|4|0.914|0.453	0	.
chr1	28612424	28612442	P0vsP39_P39_hypo_dmr_4276|4|0.961|0.576	0	.
chr1	28795668	28796008	P0vsP39_P39_hypo_dmr_4286|4|0.735|0.310	0	.
chr1	28806410	28807325	P0vsP39_P39_hypo_dmr_4288|5|0.929|0.607	0	.
chr1	28807966	28808436	P0vsP39_P39_hypo_dmr_4289|6|0.852|0.344	0	.
chr1	28809568	28809699	P0vsP39_P39_hypo_dmr_4290|3|0.960|0.415	0	.
chr1	28810861	28811155	P0vsP39_P39_hypo_dmr_4291|7|0.887|0.521	0	.
chr1	28870525	28870759	P0vsP39_P39_hypo_dmr_4296|4|0.581|0.231	0	.
chr1	28963997	28964103	P0vsP39_P39_hypo_dmr_4303|4|0.786|0.373	0	.
chr1	28966715	28967146	P0vsP39_P39_hypo_dmr_4305|5|0.878|0.546	0	.
chr1	28971074	28971798	P0vsP39_P39_hypo_dmr_4307|8|0.815|0.403	0	.
chr1	28997242	28997753	P0vsP39_P39_hypo_dmr_4309|6|0.895|0.526	0	.
chr1	29043453	29043827	P0vsP39_P39_hypo_dmr_4312|3|0.929|0.549	0	.
chr1	29057276	29058058	P0vsP39_P39_hypo_dmr_4313|7|0.884|0.338	0	.
chr1	29096594	29097101	P0vsP39_P39_hypo_dmr_4316|4|0.941|0.641	0	.
chr1	29122410	29122649	P0vsP39_P39_hypo_dmr_4317|7|0.924|0.615	0	.
chr1	29322134	29322520	P0vsP39_P39_hypo_dmr_4326|3|0.889|0.581	0	.
chr1	29331841	29332035	P0vsP39_P39_hypo_dmr_4328|6|0.863|0.425	0	.
chr1	29363590	29364491	P0vsP39_P39_hypo_dmr_4331|5|0.824|0.364	0	.
chr1	29392338	29392483	P0vsP39_P39_hypo_dmr_4334|3|0.906|0.589	0	.
chr1	29604266	29604420	P0vsP39_P39_hypo_dmr_4345|4|0.982|0.665	0	.
chr1	29631254	29631535	P0vsP39_P39_hypo_dmr_4349|3|0.943|0.634	0	.
chr1	29721796	29722007	P0vsP39_P39_hypo_dmr_4352|5|0.850|0.477	0	.
chr1	29800224	29800231	P0vsP39_P39_hypo_dmr_4358|3|0.967|0.614	0	.
chr1	29819054	29819082	P0vsP39_P39_hypo_dmr_4360|4|0.800|0.266	0	.
chr1	29839020	29839327	P0vsP39_P39_hypo_dmr_4362|3|0.992|0.586	0	.
chr1	29855029	29855047	P0vsP39_P39_hypo_dmr_4364|4|0.871|0.412	0	.
chr1	29963690	29964832	P0vsP39_P39_hypo_dmr_4370|17|0.936|0.546	0	.
chr1	30018235	30019097	P0vsP39_P39_hypo_dmr_4374|11|0.543|0.179	0	.
chr1	30050593	30050614	P0vsP39_P39_hypo_dmr_4376|3|0.863|0.425	0	.
chr1	30144017	30144132	P0vsP39_P39_hypo_dmr_4386|6|0.936|0.447	0	.
chr1	30144788	30145767	P0vsP39_P39_hypo_dmr_4387|12|0.807|0.340	0	.
chr1	30219305	30219636	P0vsP39_P39_hypo_dmr_4390|5|0.848|0.379	0	.
chr1	30245639	30245913	P0vsP39_P39_hypo_dmr_4393|3|0.896|0.578	0	.
chr1	30416402	30416512	P0vsP39_P39_hypo_dmr_4407|5|0.914|0.235	0	.
chr1	30417497	30418315	P0vsP39_P39_hypo_dmr_4408|5|0.919|0.549	0	.
chr1	30527720	30528347	P0vsP39_P39_hypo_dmr_4419|14|0.931|0.602	0	.
chr1	30533915	30534157	P0vsP39_P39_hypo_dmr_4420|3|0.973|0.659	0	.
chr1	30554988	30555153	P0vsP39_P39_hypo_dmr_4427|6|0.644|0.261	0	.
chr1	30565472	30565666	P0vsP39_P39_hypo_dmr_4429|3|0.885|0.254	0	.
chr1	30586219	30586321	P0vsP39_P39_hypo_dmr_4432|4|0.748|0.292	0	.
chr1	30593049	30593221	P0vsP39_P39_hypo_dmr_4435|3|0.911|0.358	0	.
chr1	30593851	30594014	P0vsP39_P39_hypo_dmr_4436|4|0.816|0.312	0	.
chr1	30636405	30636923	P0vsP39_P39_hypo_dmr_4444|6|0.745|0.442	0	.
chr1	30647097	30647352	P0vsP39_P39_hypo_dmr_4447|4|0.931|0.344	0	.
chr1	30667021	30667160	P0vsP39_P39_hypo_dmr_4451|4|0.978|0.675	0	.
chr1	30681235	30681616	P0vsP39_P39_hypo_dmr_4455|8|0.731|0.241	0	.
chr1	30684582	30686008	P0vsP39_P39_hypo_dmr_4457|11|0.832|0.366	0	.
chr1	30716087	30717134	P0vsP39_P39_hypo_dmr_4459|9|0.851|0.303	0	.
chr1	30718992	30721127	P0vsP39_P39_hypo_dmr_4460|15|0.847|0.541	0	.
chr1	30749034	30750526	P0vsP39_P39_hypo_dmr_4463|6|0.914|0.600	0	.
chr1	30753696	30753976	P0vsP39_P39_hypo_dmr_4465|3|0.935|0.633	0	.
chr1	30755157	30755435	P0vsP39_P39_hypo_dmr_4466|3|0.730|0.388	0	.
chr1	30756256	30756544	P0vsP39_P39_hypo_dmr_4467|5|0.517|0.160	0	.
chr1	30792285	30794084	P0vsP39_P39_hypo_dmr_4470|27|0.879|0.434	0	.
chr1	30797396	30798323	P0vsP39_P39_hypo_dmr_4471|10|0.853|0.454	0	.
chr1	30798922	30799374	P0vsP39_P39_hypo_dmr_4472|5|0.910|0.556	0	.
chr1	30819011	30822794	P0vsP39_P39_hypo_dmr_4480|51|0.917|0.575	0	.
chr1	30824846	30825564	P0vsP39_P39_hypo_dmr_4481|12|0.879|0.485	0	.
chr1	30827097	30827290	P0vsP39_P39_hypo_dmr_4482|3|0.977|0.638	0	.
chr1	30828783	30829133	P0vsP39_P39_hypo_dmr_4483|5|0.866|0.520	0	.
chr1	30832281	30833186	P0vsP39_P39_hypo_dmr_4485|15|0.830|0.309	0	.
chr1	30839343	30839440	P0vsP39_P39_hypo_dmr_4488|3|0.936|0.604	0	.
chr1	30846143	30846552	P0vsP39_P39_hypo_dmr_4492|4|0.934|0.331	0	.
chr1	30848156	30848556	P0vsP39_P39_hypo_dmr_4494|11|0.876|0.353	0	.
chr1	30851960	30852852	P0vsP39_P39_hypo_dmr_4496|9|0.812|0.337	0	.
chr1	30853403	30853689	P0vsP39_P39_hypo_dmr_4497|4|0.827|0.447	0	.
chr1	30860183	30860855	P0vsP39_P39_hypo_dmr_4498|14|0.893|0.358	0	.
chr1	30862220	30863100	P0vsP39_P39_hypo_dmr_4499|10|0.938|0.547	0	.
chr1	30865853	30866545	P0vsP39_P39_hypo_dmr_4501|10|0.944|0.628	0	.
chr1	30867193	30867457	P0vsP39_P39_hypo_dmr_4502|6|0.964|0.605	0	.
chr1	30868200	30870327	P0vsP39_P39_hypo_dmr_4503|18|0.929|0.541	0	.
chr1	30874385	30874482	P0vsP39_P39_hypo_dmr_4505|5|0.397|0.078	0	.
chr1	30875109	30875127	P0vsP39_P39_hypo_dmr_4506|3|0.765|0.455	0	.
chr1	30930048	30930207	P0vsP39_P39_hypo_dmr_4516|3|0.864|0.544	0	.
chr1	30945280	30945966	P0vsP39_P39_hypo_dmr_4519|11|0.878|0.457	0	.
chr1	30947554	30948171	P0vsP39_P39_hypo_dmr_4520|7|0.530|0.201	0	.
chr1	30964985	30965223	P0vsP39_P39_hypo_dmr_4523|3|0.930|0.556	0	.
chr1	30996761	30996845	P0vsP39_P39_hypo_dmr_4525|3|0.842|0.514	0	.
chr1	31019480	31019642	P0vsP39_P39_hypo_dmr_4527|9|0.854|0.406	0	.
chr1	31028976	31029444	P0vsP39_P39_hypo_dmr_4528|11|0.779|0.390	0	.
chr1	31059390	31059685	P0vsP39_P39_hypo_dmr_4532|10|0.849|0.460	0	.
chr1	31095920	31096180	P0vsP39_P39_hypo_dmr_4537|5|0.743|0.252	0	.
chr1	31100464	31102505	P0vsP39_P39_hypo_dmr_4538|24|0.779|0.428	0	.
chr1	31133513	31134272	P0vsP39_P39_hypo_dmr_4543|18|0.894|0.408	0	.
chr1	31142404	31142623	P0vsP39_P39_hypo_dmr_4545|8|0.734|0.105	0	.
chr1	31157096	31157256	P0vsP39_P39_hypo_dmr_4550|4|0.876|0.348	0	.
chr1	31161501	31161971	P0vsP39_P39_hypo_dmr_4551|7|0.919|0.572	0	.
chr1	31177389	31177848	P0vsP39_P39_hypo_dmr_4555|8|0.891|0.401	0	.
chr1	31196789	31196884	P0vsP39_P39_hypo_dmr_4557|5|0.677|0.363	0	.
chr1	31203754	31204103	P0vsP39_P39_hypo_dmr_4558|17|0.945|0.340	0	.
chr1	31260398	31261054	P0vsP39_P39_hypo_dmr_4565|16|0.679|0.144	0	.
chr1	31319042	31319497	P0vsP39_P39_hypo_dmr_4569|5|0.775|0.355	0	.
chr1	31322371	31322891	P0vsP39_P39_hypo_dmr_4570|7|0.771|0.362	0	.
chr1	31337201	31337263	P0vsP39_P39_hypo_dmr_4572|4|0.570|0.147	0	.
chr1	31582918	31583618	P0vsP39_P39_hypo_dmr_4588|6|0.786|0.461	0	.
chr1	31588591	31588922	P0vsP39_P39_hypo_dmr_4589|3|0.867|0.546	0	.
chr1	31704482	31704802	P0vsP39_P39_hypo_dmr_4596|4|0.808|0.481	0	.
chr1	31730021	31730520	P0vsP39_P39_hypo_dmr_4597|6|0.739|0.286	0	.
chr1	31756756	31757010	P0vsP39_P39_hypo_dmr_4599|3|0.915|0.556	0	.
chr1	31810650	31811865	P0vsP39_P39_hypo_dmr_4600|27|0.819|0.466	0	.
chr1	31926058	31926078	P0vsP39_P39_hypo_dmr_4604|4|0.950|0.621	0	.
chr1	31990892	31990901	P0vsP39_P39_hypo_dmr_4609|4|0.896|0.444	0	.
chr1	32174891	32175847	P0vsP39_P39_hypo_dmr_4618|15|0.416|0.100	0	.
chr1	32178835	32179410	P0vsP39_P39_hypo_dmr_4620|4|0.758|0.347	0	.
chr1	32190589	32190956	P0vsP39_P39_hypo_dmr_4621|7|0.909|0.564	0	.
chr1	32214225	32214349	P0vsP39_P39_hypo_dmr_4625|4|0.905|0.528	0	.
chr1	32224361	32224990	P0vsP39_P39_hypo_dmr_4626|5|0.683|0.331	0	.
chr1	32242350	32243218	P0vsP39_P39_hypo_dmr_4629|12|0.734|0.316	0	.
chr1	32271808	32272137	P0vsP39_P39_hypo_dmr_4634|5|0.848|0.390	0	.
chr1	32275818	32276065	P0vsP39_P39_hypo_dmr_4635|3|0.944|0.616	0	.
chr1	32286530	32286599	P0vsP39_P39_hypo_dmr_4636|6|0.847|0.336	0	.
chr1	32292829	32293313	P0vsP39_P39_hypo_dmr_4638|6|0.833|0.415	0	.
chr1	32294474	32294886	P0vsP39_P39_hypo_dmr_4639|8|0.823|0.341	0	.
chr1	32301508	32302270	P0vsP39_P39_hypo_dmr_4642|12|0.872|0.448	0	.
chr1	32303583	32303839	P0vsP39_P39_hypo_dmr_4643|4|0.880|0.226	0	.
chr1	32326885	32327123	P0vsP39_P39_hypo_dmr_4650|4|0.934|0.500	0	.
chr1	32339433	32339823	P0vsP39_P39_hypo_dmr_4653|5|0.698|0.379	0	.
chr1	32346263	32346388	P0vsP39_P39_hypo_dmr_4656|8|0.927|0.412	0	.
chr1	32346940	32348757	P0vsP39_P39_hypo_dmr_4657|17|0.656|0.209	0	.
chr1	32410117	32410804	P0vsP39_P39_hypo_dmr_4663|12|0.534|0.195	0	.
chr1	32426444	32426916	P0vsP39_P39_hypo_dmr_4666|8|0.848|0.406	0	.
chr1	32429139	32429248	P0vsP39_P39_hypo_dmr_4667|6|0.872|0.425	0	.
chr1	32430535	32430610	P0vsP39_P39_hypo_dmr_4668|5|0.906|0.489	0	.
chr1	32442889	32444121	P0vsP39_P39_hypo_dmr_4669|20|0.708|0.157	0	.
chr1	32444667	32444980	P0vsP39_P39_hypo_dmr_4670|6|0.912|0.600	0	.
chr1	32460974	32461074	P0vsP39_P39_hypo_dmr_4671|5|0.925|0.505	0	.
chr1	32483462	32483517	P0vsP39_P39_hypo_dmr_4675|3|0.894|0.481	0	.
chr1	32501746	32502119	P0vsP39_P39_hypo_dmr_4678|3|0.904|0.499	0	.
chr1	32503403	32504000	P0vsP39_P39_hypo_dmr_4679|15|0.770|0.211	0	.
chr1	32532507	32532617	P0vsP39_P39_hypo_dmr_4684|3|0.821|0.329	0	.
chr1	32533201	32533841	P0vsP39_P39_hypo_dmr_4685|4|0.921|0.468	0	.
chr1	32562704	32562920	P0vsP39_P39_hypo_dmr_4687|3|0.969|0.551	0	.
chr1	32611335	32612230	P0vsP39_P39_hypo_dmr_4698|15|0.835|0.248	0	.
chr1	32633569	32633932	P0vsP39_P39_hypo_dmr_4704|4|0.576|0.214	0	.
chr1	32639033	32640529	P0vsP39_P39_hypo_dmr_4705|24|0.799|0.358	0	.
chr1	32653717	32653838	P0vsP39_P39_hypo_dmr_4709|4|0.900|0.438	0	.
chr1	32654938	32655856	P0vsP39_P39_hypo_dmr_4710|15|0.904|0.593	0	.
chr1	32675168	32675252	P0vsP39_P39_hypo_dmr_4713|4|0.751|0.392	0	.
chr1	32689836	32689888	P0vsP39_P39_hypo_dmr_4715|3|0.939|0.553	0	.
chr1	32774369	32774621	P0vsP39_P39_hypo_dmr_4728|6|0.947|0.607	0	.
chr1	32827177	32827197	P0vsP39_P39_hypo_dmr_4734|3|0.923|0.593	0	.
chr1	32830575	32831077	P0vsP39_P39_hypo_dmr_4735|6|0.514|0.198	0	.
chr1	32848086	32848459	P0vsP39_P39_hypo_dmr_4737|5|0.545|0.172	0	.
chr1	32872742	32873278	P0vsP39_P39_hypo_dmr_4742|14|0.919|0.603	0	.
chr1	32885181	32886084	P0vsP39_P39_hypo_dmr_4744|10|0.907|0.421	0	.
chr1	32939282	32940129	P0vsP39_P39_hypo_dmr_4747|5|0.941|0.589	0	.
chr1	33062285	33062295	P0vsP39_P39_hypo_dmr_4762|4|0.860|0.178	0	.
chr1	33102577	33102905	P0vsP39_P39_hypo_dmr_4764|7|0.825|0.513	0	.
chr1	33104692	33104989	P0vsP39_P39_hypo_dmr_4765|8|0.858|0.539	0	.
chr1	33124792	33126128	P0vsP39_P39_hypo_dmr_4768|26|0.609|0.250	0	.
chr1	33126669	33126838	P0vsP39_P39_hypo_dmr_4769|4|0.830|0.365	0	.
chr1	33136778	33136855	P0vsP39_P39_hypo_dmr_4771|5|0.893|0.496	0	.
chr1	33170950	33171185	P0vsP39_P39_hypo_dmr_4775|3|0.963|0.532	0	.
chr1	33174557	33176629	P0vsP39_P39_hypo_dmr_4776|31|0.590|0.237	0	.
chr1	33193603	33193646	P0vsP39_P39_hypo_dmr_4781|3|0.943|0.461	0	.
chr1	33202218	33202272	P0vsP39_P39_hypo_dmr_4785|3|0.469|0.085	0	.
chr1	33204492	33204689	P0vsP39_P39_hypo_dmr_4786|4|0.961|0.596	0	.
chr1	33211205	33211632	P0vsP39_P39_hypo_dmr_4788|5|0.923|0.477	0	.
chr1	33248255	33248409	P0vsP39_P39_hypo_dmr_4794|5|0.950|0.524	0	.
chr1	33271493	33272113	P0vsP39_P39_hypo_dmr_4800|15|0.396|0.062	0	.
chr1	33299189	33299497	P0vsP39_P39_hypo_dmr_4804|4|0.927|0.615	0	.
chr1	33377390	33377778	P0vsP39_P39_hypo_dmr_4816|6|0.930|0.456	0	.
chr1	33422741	33422892	P0vsP39_P39_hypo_dmr_4818|3|0.917|0.577	0	.
chr1	33454245	33454787	P0vsP39_P39_hypo_dmr_4824|15|0.949|0.527	0	.
chr1	33479577	33479689	P0vsP39_P39_hypo_dmr_4830|3|0.904|0.523	0	.
chr1	33491860	33492281	P0vsP39_P39_hypo_dmr_4832|4|0.667|0.327	0	.
chr1	33522635	33523660	P0vsP39_P39_hypo_dmr_4840|19|0.873|0.450	0	.
chr1	33529922	33530120	P0vsP39_P39_hypo_dmr_4843|7|0.922|0.318	0	.
chr1	33531871	33532102	P0vsP39_P39_hypo_dmr_4845|4|0.877|0.529	0	.
chr1	33563938	33564379	P0vsP39_P39_hypo_dmr_4851|9|0.835|0.485	0	.
chr1	33584325	33584526	P0vsP39_P39_hypo_dmr_4857|8|0.902|0.282	0	.
chr1	33671722	33671738	P0vsP39_P39_hypo_dmr_4889|4|0.673|0.156	0	.
chr1	33673043	33673355	P0vsP39_P39_hypo_dmr_4890|12|0.639|0.286	0	.
chr1	33689599	33689968	P0vsP39_P39_hypo_dmr_4894|6|0.808|0.494	0	.
chr1	33691029	33691682	P0vsP39_P39_hypo_dmr_4895|16|0.911|0.481	0	.
chr1	33693558	33693926	P0vsP39_P39_hypo_dmr_4897|5|0.823|0.439	0	.
chr1	33694944	33694948	P0vsP39_P39_hypo_dmr_4898|4|0.948|0.569	0	.
chr1	33700934	33701280	P0vsP39_P39_hypo_dmr_4901|6|0.491|0.137	0	.
chr1	33705472	33705711	P0vsP39_P39_hypo_dmr_4904|4|0.959|0.595	0	.
chr1	33727449	33728926	P0vsP39_P39_hypo_dmr_4909|16|0.927|0.610	0	.
chr1	33746961	33747151	P0vsP39_P39_hypo_dmr_4917|13|0.903|0.388	0	.
chr1	33753772	33754290	P0vsP39_P39_hypo_dmr_4921|13|0.906|0.542	0	.
chr1	33765638	33765741	P0vsP39_P39_hypo_dmr_4926|7|0.945|0.528	0	.
chr1	33770334	33772802	P0vsP39_P39_hypo_dmr_4928|43|0.902|0.517	0	.
chr1	33809609	33813519	P0vsP39_P39_hypo_dmr_4941|38|0.853|0.534	0	.
chr1	33817764	33818136	P0vsP39_P39_hypo_dmr_4943|6|0.755|0.305	0	.
chr1	33844325	33844544	P0vsP39_P39_hypo_dmr_4950|3|0.407|0.106	0	.
chr1	33846144	33846363	P0vsP39_P39_hypo_dmr_4952|6|0.827|0.521	0	.
chr1	33846818	33847049	P0vsP39_P39_hypo_dmr_4953|3|0.951|0.571	0	.
chr1	33859749	33860004	P0vsP39_P39_hypo_dmr_4954|7|0.895|0.418	0	.
chr1	33868766	33869900	P0vsP39_P39_hypo_dmr_4956|14|0.821|0.315	0	.
chr1	33871902	33872240	P0vsP39_P39_hypo_dmr_4957|4|0.939|0.633	0	.
chr1	33877082	33877324	P0vsP39_P39_hypo_dmr_4962|6|0.926|0.441	0	.
chr1	33896986	33897849	P0vsP39_P39_hypo_dmr_4968|21|0.660|0.331	0	.
chr1	33900249	33900464	P0vsP39_P39_hypo_dmr_4969|12|0.594|0.216	0	.
chr1	33911929	33912059	P0vsP39_P39_hypo_dmr_4977|3|0.845|0.474	0	.
chr1	33928166	33928823	P0vsP39_P39_hypo_dmr_4983|11|0.871|0.558	0	.
chr1	33932486	33933500	P0vsP39_P39_hypo_dmr_4986|22|0.546|0.229	0	.
chr1	33938186	33938745	P0vsP39_P39_hypo_dmr_4988|10|0.742|0.406	0	.
chr1	33952583	33953322	P0vsP39_P39_hypo_dmr_4993|10|0.961|0.594	0	.
chr1	33983421	33983765	P0vsP39_P39_hypo_dmr_5005|4|0.866|0.517	0	.
chr1	33994100	33994801	P0vsP39_P39_hypo_dmr_5009|19|0.705|0.248	0	.
chr1	34008409	34008495	P0vsP39_P39_hypo_dmr_5013|4|0.867|0.519	0	.
chr1	34010836	34010888	P0vsP39_P39_hypo_dmr_5016|3|0.593|0.092	0	.
chr1	34012327	34013420	P0vsP39_P39_hypo_dmr_5017|32|0.707|0.219	0	.
chr1	34013955	34015661	P0vsP39_P39_hypo_dmr_5018|27|0.825|0.450	0	.
chr1	34021979	34024157	P0vsP39_P39_hypo_dmr_5021|37|0.740|0.380	0	.
chr1	34027491	34029455	P0vsP39_P39_hypo_dmr_5024|27|0.845|0.482	0	.
chr1	34030111	34030396	P0vsP39_P39_hypo_dmr_5025|7|0.834|0.413	0	.
chr1	34032778	34032860	P0vsP39_P39_hypo_dmr_5026|3|0.946|0.556	0	.
chr1	34039745	34041344	P0vsP39_P39_hypo_dmr_5029|33|0.639|0.221	0	.
chr1	34044834	34044929	P0vsP39_P39_hypo_dmr_5032|3|0.622|0.287	0	.
chr1	34046532	34046857	P0vsP39_P39_hypo_dmr_5034|5|0.880|0.522	0	.
chr1	34054221	34056086	P0vsP39_P39_hypo_dmr_5038|36|0.822|0.498	0	.
chr1	34062184	34062472	P0vsP39_P39_hypo_dmr_5041|3|0.730|0.410	0	.
chr1	34064987	34065537	P0vsP39_P39_hypo_dmr_5042|7|0.855|0.446	0	.
chr1	34077692	34078412	P0vsP39_P39_hypo_dmr_5046|17|0.819|0.377	0	.
chr1	34088977	34091035	P0vsP39_P39_hypo_dmr_5049|29|0.927|0.558	0	.
chr1	34094525	34095018	P0vsP39_P39_hypo_dmr_5051|7|0.680|0.357	0	.
chr1	34109783	34110227	P0vsP39_P39_hypo_dmr_5060|7|0.668|0.316	0	.
chr1	34111142	34111149	P0vsP39_P39_hypo_dmr_5061|3|0.744|0.317	0	.
chr1	34117677	34118273	P0vsP39_P39_hypo_dmr_5063|6|0.678|0.351	0	.
chr1	34126259	34126601	P0vsP39_P39_hypo_dmr_5067|7|0.953|0.592	0	.
chr1	34136783	34137629	P0vsP39_P39_hypo_dmr_5071|10|0.941|0.584	0	.
chr1	34142914	34143373	P0vsP39_P39_hypo_dmr_5074|12|0.599|0.270	0	.
chr1	34151663	34152075	P0vsP39_P39_hypo_dmr_5078|8|0.960|0.647	0	.
chr1	34168295	34168370	P0vsP39_P39_hypo_dmr_5086|3|0.908|0.449	0	.
chr1	34215865	34216050	P0vsP39_P39_hypo_dmr_5106|6|0.853|0.478	0	.
chr1	34234341	34234655	P0vsP39_P39_hypo_dmr_5117|6|0.922|0.518	0	.
chr1	34235516	34235755	P0vsP39_P39_hypo_dmr_5118|11|0.877|0.512	0	.
chr1	34248125	34249339	P0vsP39_P39_hypo_dmr_5125|20|0.920|0.403	0	.
chr1	34264014	34265966	P0vsP39_P39_hypo_dmr_5133|57|0.902|0.506	0	.
chr1	34278246	34278514	P0vsP39_P39_hypo_dmr_5138|4|0.895|0.490	0	.
chr1	34283708	34283837	P0vsP39_P39_hypo_dmr_5141|9|0.793|0.413	0	.
chr1	34285006	34285087	P0vsP39_P39_hypo_dmr_5142|5|0.615|0.222	0	.
chr1	34297283	34297819	P0vsP39_P39_hypo_dmr_5150|18|0.803|0.389	0	.
chr1	34300152	34301258	P0vsP39_P39_hypo_dmr_5152|17|0.547|0.212	0	.
chr1	34323707	34323757	P0vsP39_P39_hypo_dmr_5160|3|0.571|0.190	0	.
chr1	34325567	34327198	P0vsP39_P39_hypo_dmr_5161|31|0.823|0.464	0	.
chr1	34330623	34333248	P0vsP39_P39_hypo_dmr_5164|33|0.801|0.499	0	.
chr1	34366697	34367691	P0vsP39_P39_hypo_dmr_5169|13|0.874|0.389	0	.
chr1	34409975	34410173	P0vsP39_P39_hypo_dmr_5180|6|0.644|0.190	0	.
chr1	34435505	34437127	P0vsP39_P39_hypo_dmr_5185|20|0.666|0.298	0	.
chr1	34448228	34448371	P0vsP39_P39_hypo_dmr_5189|7|0.918|0.557	0	.
chr1	34451359	34451425	P0vsP39_P39_hypo_dmr_5190|5|0.930|0.582	0	.
chr1	34484440	34484735	P0vsP39_P39_hypo_dmr_5198|11|0.810|0.206	0	.
chr1	34490255	34490409	P0vsP39_P39_hypo_dmr_5200|3|0.875|0.526	0	.
chr1	34497247	34497275	P0vsP39_P39_hypo_dmr_5201|4|0.972|0.307	0	.
chr1	34570814	34571819	P0vsP39_P39_hypo_dmr_5211|22|0.783|0.385	0	.
chr1	34580605	34581291	P0vsP39_P39_hypo_dmr_5213|11|0.700|0.312	0	.
chr1	34592369	34592625	P0vsP39_P39_hypo_dmr_5218|5|0.922|0.512	0	.
chr1	34593927	34594787	P0vsP39_P39_hypo_dmr_5219|5|0.931|0.624	0	.
chr1	34596882	34597252	P0vsP39_P39_hypo_dmr_5221|4|0.867|0.528	0	.
chr1	34599386	34599629	P0vsP39_P39_hypo_dmr_5222|4|0.831|0.450	0	.
chr1	34654400	34654540	P0vsP39_P39_hypo_dmr_5231|15|0.915|0.413	0	.
chr1	34677134	34677322	P0vsP39_P39_hypo_dmr_5233|3|0.765|0.411	0	.
chr1	34699855	34699986	P0vsP39_P39_hypo_dmr_5237|7|0.886|0.454	0	.
chr1	34703785	34703926	P0vsP39_P39_hypo_dmr_5238|8|0.880|0.530	0	.
chr1	34717131	34717164	P0vsP39_P39_hypo_dmr_5244|3|0.563|0.225	0	.
chr1	34748824	34749249	P0vsP39_P39_hypo_dmr_5251|6|0.704|0.378	0	.
chr1	34760662	34761308	P0vsP39_P39_hypo_dmr_5253|15|0.878|0.276	0	.
chr1	34762708	34763082	P0vsP39_P39_hypo_dmr_5254|6|0.908|0.475	0	.
chr1	34768697	34769529	P0vsP39_P39_hypo_dmr_5255|10|0.593|0.218	0	.
chr1	34779244	34780518	P0vsP39_P39_hypo_dmr_5259|13|0.736|0.339	0	.
chr1	34782900	34782925	P0vsP39_P39_hypo_dmr_5261|3|0.848|0.379	0	.
chr1	34793257	34794221	P0vsP39_P39_hypo_dmr_5262|29|0.743|0.221	0	.
chr1	34799510	34799883	P0vsP39_P39_hypo_dmr_5263|8|0.895|0.408	0	.
chr1	34802631	34805801	P0vsP39_P39_hypo_dmr_5265|50|0.779|0.378	0	.
chr1	34809973	34818891	P0vsP39_P39_hypo_dmr_5268|122|0.862|0.540	0	.
chr1	34819871	34821220	P0vsP39_P39_hypo_dmr_5269|10|0.903|0.578	0	.
chr1	34821935	34823649	P0vsP39_P39_hypo_dmr_5270|41|0.911|0.374	0	.
chr1	34824241	34824995	P0vsP39_P39_hypo_dmr_5271|26|0.867|0.158	0	.
chr1	34826453	34826820	P0vsP39_P39_hypo_dmr_5272|4|0.727|0.372	0	.
chr1	34827520	34828004	P0vsP39_P39_hypo_dmr_5273|7|0.903|0.414	0	.
chr1	34828786	34829403	P0vsP39_P39_hypo_dmr_5274|9|0.910|0.216	0	.
chr1	34831181	34831208	P0vsP39_P39_hypo_dmr_5275|4|0.755|0.062	0	.
chr1	34839952	34840064	P0vsP39_P39_hypo_dmr_5279|4|0.895|0.472	0	.
chr1	34843688	34844418	P0vsP39_P39_hypo_dmr_5281|7|0.936|0.544	0	.
chr1	34851200	34853145	P0vsP39_P39_hypo_dmr_5283|31|0.640|0.249	0	.
chr1	34877539	34878726	P0vsP39_P39_hypo_dmr_5293|32|0.770|0.356	0	.
chr1	35003019	35004759	P0vsP39_P39_hypo_dmr_5310|16|0.825|0.478	0	.
chr1	35020293	35020800	P0vsP39_P39_hypo_dmr_5314|6|0.916|0.466	0	.
chr1	35053238	35053267	P0vsP39_P39_hypo_dmr_5318|4|0.888|0.118	0	.
chr1	35084742	35084757	P0vsP39_P39_hypo_dmr_5320|5|0.993|0.681	0	.
chr1	35087672	35087868	P0vsP39_P39_hypo_dmr_5321|5|0.851|0.548	0	.
chr1	35162234	35162284	P0vsP39_P39_hypo_dmr_5328|4|0.587|0.098	0	.
chr1	35175842	35176016	P0vsP39_P39_hypo_dmr_5330|4|0.895|0.507	0	.
chr1	35180658	35181293	P0vsP39_P39_hypo_dmr_5331|6|0.533|0.217	0	.
chr1	35242218	35242471	P0vsP39_P39_hypo_dmr_5340|7|0.574|0.189	0	.
chr1	35268161	35268201	P0vsP39_P39_hypo_dmr_5345|7|0.896|0.506	0	.
chr1	35292379	35292866	P0vsP39_P39_hypo_dmr_5349|5|0.653|0.345	0	.
chr1	35312076	35312564	P0vsP39_P39_hypo_dmr_5353|4|0.915|0.570	0	.
chr1	35329679	35329794	P0vsP39_P39_hypo_dmr_5355|3|0.887|0.586	0	.
chr1	35331397	35333987	P0vsP39_P39_hypo_dmr_5356|34|0.783|0.445	0	.
chr1	35359564	35360004	P0vsP39_P39_hypo_dmr_5361|9|0.816|0.416	0	.
chr1	35374648	35375385	P0vsP39_P39_hypo_dmr_5364|17|0.900|0.385	0	.
chr1	35402901	35403861	P0vsP39_P39_hypo_dmr_5371|25|0.733|0.264	0	.
chr1	35427326	35427948	P0vsP39_P39_hypo_dmr_5379|9|0.817|0.413	0	.
chr1	35428724	35428938	P0vsP39_P39_hypo_dmr_5380|3|0.722|0.266	0	.
chr1	35435591	35435836	P0vsP39_P39_hypo_dmr_5384|5|0.829|0.421	0	.
chr1	35436444	35436557	P0vsP39_P39_hypo_dmr_5385|6|0.911|0.449	0	.
chr1	35448253	35448535	P0vsP39_P39_hypo_dmr_5387|3|0.881|0.476	0	.
chr1	35483662	35483917	P0vsP39_P39_hypo_dmr_5395|4|0.747|0.410	0	.
chr1	35502767	35502900	P0vsP39_P39_hypo_dmr_5397|6|0.895|0.123	0	.
chr1	35519734	35521403	P0vsP39_P39_hypo_dmr_5400|21|0.887|0.531	0	.
chr1	35523885	35523915	P0vsP39_P39_hypo_dmr_5402|3|0.569|0.208	0	.
chr1	35525702	35526047	P0vsP39_P39_hypo_dmr_5404|3|0.966|0.648	0	.
chr1	35536365	35536632	P0vsP39_P39_hypo_dmr_5408|10|0.821|0.173	0	.
chr1	35550467	35550757	P0vsP39_P39_hypo_dmr_5411|6|0.815|0.214	0	.
chr1	35551719	35552518	P0vsP39_P39_hypo_dmr_5412|5|0.763|0.434	0	.
chr1	35557326	35558007	P0vsP39_P39_hypo_dmr_5413|7|0.888|0.568	0	.
chr1	35586072	35586186	P0vsP39_P39_hypo_dmr_5420|8|0.813|0.376	0	.
chr1	35611078	35612059	P0vsP39_P39_hypo_dmr_5426|8|0.922|0.476	0	.
chr1	35615448	35615728	P0vsP39_P39_hypo_dmr_5427|7|0.898|0.544	0	.
chr1	35622026	35622356	P0vsP39_P39_hypo_dmr_5428|5|0.832|0.528	0	.
chr1	35628153	35628290	P0vsP39_P39_hypo_dmr_5429|5|0.733|0.328	0	.
chr1	35673664	35673806	P0vsP39_P39_hypo_dmr_5437|3|0.888|0.556	0	.
chr1	35674426	35675843	P0vsP39_P39_hypo_dmr_5438|14|0.922|0.557	0	.
chr1	35699798	35700224	P0vsP39_P39_hypo_dmr_5447|4|0.992|0.656	0	.
chr1	35732742	35732875	P0vsP39_P39_hypo_dmr_5456|3|0.992|0.682	0	.
chr1	35740769	35741390	P0vsP39_P39_hypo_dmr_5458|4|0.844|0.440	0	.
chr1	35758552	35760508	P0vsP39_P39_hypo_dmr_5464|45|0.900|0.282	0	.
chr1	35767495	35767516	P0vsP39_P39_hypo_dmr_5465|3|0.600|0.197	0	.
chr1	35773653	35773776	P0vsP39_P39_hypo_dmr_5468|3|0.857|0.500	0	.
chr1	35774911	35774927	P0vsP39_P39_hypo_dmr_5469|4|0.934|0.498	0	.
chr1	35807613	35808009	P0vsP39_P39_hypo_dmr_5479|9|0.927|0.585	0	.
chr1	35809027	35809289	P0vsP39_P39_hypo_dmr_5480|6|0.641|0.205	0	.
chr1	35843574	35844138	P0vsP39_P39_hypo_dmr_5487|6|0.908|0.418	0	.
chr1	35863894	35864521	P0vsP39_P39_hypo_dmr_5495|15|0.833|0.349	0	.
chr1	35865026	35865068	P0vsP39_P39_hypo_dmr_5496|6|0.765|0.204	0	.
chr1	35877842	35878254	P0vsP39_P39_hypo_dmr_5499|3|0.885|0.485	0	.
chr1	35881787	35882191	P0vsP39_P39_hypo_dmr_5501|7|0.748|0.278	0	.
chr1	35884759	35884792	P0vsP39_P39_hypo_dmr_5503|3|0.904|0.376	0	.
chr1	35916535	35916678	P0vsP39_P39_hypo_dmr_5512|5|0.878|0.408	0	.
chr1	35924471	35924482	P0vsP39_P39_hypo_dmr_5515|4|0.973|0.661	0	.
chr1	35949207	35949563	P0vsP39_P39_hypo_dmr_5525|7|0.863|0.433	0	.
chr1	35976637	35976651	P0vsP39_P39_hypo_dmr_5535|4|0.882|0.425	0	.
chr1	35995359	35996163	P0vsP39_P39_hypo_dmr_5542|19|0.826|0.266	0	.
chr1	35996702	35997030	P0vsP39_P39_hypo_dmr_5543|3|0.925|0.465	0	.
chr1	36018792	36019281	P0vsP39_P39_hypo_dmr_5548|7|0.890|0.528	0	.
chr1	36030462	36031118	P0vsP39_P39_hypo_dmr_5549|24|0.569|0.187	0	.
chr1	36051594	36051739	P0vsP39_P39_hypo_dmr_5552|3|0.985|0.607	0	.
chr1	36066110	36066126	P0vsP39_P39_hypo_dmr_5556|4|0.827|0.411	0	.
chr1	36070364	36070405	P0vsP39_P39_hypo_dmr_5558|4|0.543|0.216	0	.
chr1	36071392	36072857	P0vsP39_P39_hypo_dmr_5559|32|0.823|0.463	0	.
chr1	36079477	36080716	P0vsP39_P39_hypo_dmr_5564|18|0.848|0.521	0	.
chr1	36120924	36121100	P0vsP39_P39_hypo_dmr_5578|5|0.812|0.284	0	.
chr1	36145449	36145748	P0vsP39_P39_hypo_dmr_5587|7|0.846|0.307	0	.
chr1	36157921	36158136	P0vsP39_P39_hypo_dmr_5593|5|0.839|0.414	0	.
chr1	36201614	36203057	P0vsP39_P39_hypo_dmr_5607|35|0.941|0.566	0	.
chr1	36214640	36214940	P0vsP39_P39_hypo_dmr_5610|9|0.939|0.510	0	.
chr1	36216170	36218011	P0vsP39_P39_hypo_dmr_5611|19|0.956|0.622	0	.
chr1	36218535	36218623	P0vsP39_P39_hypo_dmr_5612|5|0.963|0.604	0	.
chr1	36262250	36262440	P0vsP39_P39_hypo_dmr_5625|10|0.851|0.502	0	.
chr1	36297366	36297511	P0vsP39_P39_hypo_dmr_5633|5|0.812|0.313	0	.
chr1	36303974	36304092	P0vsP39_P39_hypo_dmr_5636|4|0.875|0.357	0	.
chr1	36304807	36304918	P0vsP39_P39_hypo_dmr_5637|5|0.700|0.281	0	.
chr1	36331210	36331363	P0vsP39_P39_hypo_dmr_5643|4|0.894|0.568	0	.
chr1	36334201	36334796	P0vsP39_P39_hypo_dmr_5645|6|0.929|0.604	0	.
chr1	36352532	36352565	P0vsP39_P39_hypo_dmr_5652|8|0.938|0.045	0	.
chr1	36355299	36355523	P0vsP39_P39_hypo_dmr_5653|3|0.920|0.601	0	.
chr1	36356126	36357873	P0vsP39_P39_hypo_dmr_5654|17|0.943|0.618	0	.
chr1	36402400	36403031	P0vsP39_P39_hypo_dmr_5662|10|0.895|0.541	0	.
chr1	36435143	36436424	P0vsP39_P39_hypo_dmr_5669|24|0.903|0.352	0	.
chr1	36437084	36437219	P0vsP39_P39_hypo_dmr_5670|4|0.957|0.452	0	.
chr1	36444149	36444447	P0vsP39_P39_hypo_dmr_5672|3|0.665|0.279	0	.
chr1	36454117	36454441	P0vsP39_P39_hypo_dmr_5675|5|0.802|0.432	0	.
chr1	36457773	36459566	P0vsP39_P39_hypo_dmr_5676|18|0.780|0.463	0	.
chr1	36494623	36494763	P0vsP39_P39_hypo_dmr_5688|4|0.968|0.610	0	.
chr1	36496138	36496306	P0vsP39_P39_hypo_dmr_5689|8|0.839|0.377	0	.
chr1	36508260	36508422	P0vsP39_P39_hypo_dmr_5691|4|0.915|0.576	0	.
chr1	36546376	36546627	P0vsP39_P39_hypo_dmr_5705|13|0.607|0.193	0	.
chr1	36551116	36551470	P0vsP39_P39_hypo_dmr_5706|12|0.852|0.379	0	.
chr1	36553040	36553079	P0vsP39_P39_hypo_dmr_5707|3|0.864|0.511	0	.
chr1	36566920	36567021	P0vsP39_P39_hypo_dmr_5714|3|0.759|0.408	0	.
chr1	36595038	36595373	P0vsP39_P39_hypo_dmr_5727|4|0.886|0.480	0	.
chr1	36599769	36599897	P0vsP39_P39_hypo_dmr_5729|6|0.823|0.262	0	.
chr1	36606411	36606893	P0vsP39_P39_hypo_dmr_5732|9|0.783|0.308	0	.
chr1	36617032	36617057	P0vsP39_P39_hypo_dmr_5734|3|0.948|0.575	0	.
chr1	36618994	36619294	P0vsP39_P39_hypo_dmr_5736|6|0.634|0.197	0	.
chr1	36692186	36693062	P0vsP39_P39_hypo_dmr_5753|12|0.807|0.435	0	.
chr1	36696719	36699153	P0vsP39_P39_hypo_dmr_5755|35|0.770|0.440	0	.
chr1	36705509	36708887	P0vsP39_P39_hypo_dmr_5759|32|0.825|0.521	0	.
chr1	36743682	36744582	P0vsP39_P39_hypo_dmr_5766|23|0.539|0.178	0	.
chr1	36764258	36764731	P0vsP39_P39_hypo_dmr_5769|10|0.910|0.434	0	.
chr1	36796782	36800668	P0vsP39_P39_hypo_dmr_5777|71|0.893|0.574	0	.
chr1	36801182	36802401	P0vsP39_P39_hypo_dmr_5778|25|0.827|0.435	0	.
chr1	36803011	36803840	P0vsP39_P39_hypo_dmr_5779|19|0.871|0.485	0	.
chr1	36811844	36812924	P0vsP39_P39_hypo_dmr_5783|30|0.911|0.536	0	.
chr1	36813509	36815538	P0vsP39_P39_hypo_dmr_5784|39|0.633|0.205	0	.
chr1	36831425	36831748	P0vsP39_P39_hypo_dmr_5789|11|0.574|0.204	0	.
chr1	36832472	36833315	P0vsP39_P39_hypo_dmr_5790|11|0.892|0.584	0	.
chr1	36835410	36835945	P0vsP39_P39_hypo_dmr_5792|12|0.960|0.440	0	.
chr1	36842798	36842967	P0vsP39_P39_hypo_dmr_5796|3|0.890|0.564	0	.
chr1	36845619	36847702	P0vsP39_P39_hypo_dmr_5798|30|0.885|0.506	0	.
chr1	36854475	36855279	P0vsP39_P39_hypo_dmr_5802|15|0.928|0.483	0	.
chr1	36858526	36858577	P0vsP39_P39_hypo_dmr_5804|3|0.954|0.641	0	.
chr1	36859133	36859370	P0vsP39_P39_hypo_dmr_5805|3|0.881|0.511	0	.
chr1	36865301	36865870	P0vsP39_P39_hypo_dmr_5806|4|0.877|0.508	0	.
chr1	36867239	36867816	P0vsP39_P39_hypo_dmr_5807|5|0.887|0.361	0	.
chr1	36873957	36874009	P0vsP39_P39_hypo_dmr_5809|4|0.872|0.570	0	.
chr1	36875051	36876507	P0vsP39_P39_hypo_dmr_5810|15|0.730|0.420	0	.
chr1	36884593	36884761	P0vsP39_P39_hypo_dmr_5813|3|0.818|0.446	0	.
chr1	36889555	36890496	P0vsP39_P39_hypo_dmr_5818|12|0.910|0.576	0	.
chr1	36896480	36898041	P0vsP39_P39_hypo_dmr_5823|18|0.858|0.441	0	.
chr1	36900698	36901700	P0vsP39_P39_hypo_dmr_5825|14|0.856|0.547	0	.
chr1	36909548	36909945	P0vsP39_P39_hypo_dmr_5829|4|0.923|0.562	0	.
chr1	36920505	36921393	P0vsP39_P39_hypo_dmr_5833|16|0.771|0.373	0	.
chr1	36926546	36927389	P0vsP39_P39_hypo_dmr_5836|25|0.872|0.372	0	.
chr1	36935169	36935592	P0vsP39_P39_hypo_dmr_5841|10|0.643|0.242	0	.
chr1	36936537	36937572	P0vsP39_P39_hypo_dmr_5842|22|0.812|0.398	0	.
chr1	36943640	36944013	P0vsP39_P39_hypo_dmr_5844|8|0.761|0.352	0	.
chr1	36974166	36974325	P0vsP39_P39_hypo_dmr_5854|3|0.877|0.413	0	.
chr1	37021651	37021749	P0vsP39_P39_hypo_dmr_5869|4|0.910|0.527	0	.
chr1	37054021	37054063	P0vsP39_P39_hypo_dmr_5876|4|0.803|0.285	0	.
chr1	37059828	37060333	P0vsP39_P39_hypo_dmr_5878|10|0.945|0.643	0	.
chr1	37065392	37066343	P0vsP39_P39_hypo_dmr_5880|24|0.557|0.068	0	.
chr1	37069805	37069915	P0vsP39_P39_hypo_dmr_5882|4|0.907|0.470	0	.
chr1	37078528	37078967	P0vsP39_P39_hypo_dmr_5884|10|0.834|0.473	0	.
chr1	37088213	37088859	P0vsP39_P39_hypo_dmr_5885|15|0.587|0.219	0	.
chr1	37102769	37104768	P0vsP39_P39_hypo_dmr_5890|28|0.790|0.406	0	.
chr1	37114982	37118412	P0vsP39_P39_hypo_dmr_5895|72|0.874|0.424	0	.
chr1	37151757	37153516	P0vsP39_P39_hypo_dmr_5909|45|0.890|0.385	0	.
chr1	37171263	37171406	P0vsP39_P39_hypo_dmr_5919|5|0.911|0.578	0	.
chr1	37172249	37172690	P0vsP39_P39_hypo_dmr_5920|7|0.921|0.616	0	.
chr1	37173734	37174343	P0vsP39_P39_hypo_dmr_5921|7|0.848|0.503	0	.
chr1	37177898	37177979	P0vsP39_P39_hypo_dmr_5922|4|0.918|0.434	0	.
chr1	37208219	37208695	P0vsP39_P39_hypo_dmr_5930|7|0.855|0.449	0	.
chr1	37219811	37219924	P0vsP39_P39_hypo_dmr_5933|8|0.734|0.181	0	.
chr1	37220629	37220708	P0vsP39_P39_hypo_dmr_5934|3|0.468|0.091	0	.
chr1	37221253	37221451	P0vsP39_P39_hypo_dmr_5935|9|0.893|0.401	0	.
chr1	37230810	37232219	P0vsP39_P39_hypo_dmr_5937|26|0.777|0.276	0	.
chr1	37241874	37242508	P0vsP39_P39_hypo_dmr_5942|18|0.895|0.530	0	.
chr1	37250559	37250639	P0vsP39_P39_hypo_dmr_5944|4|0.724|0.197	0	.
chr1	37251270	37251332	P0vsP39_P39_hypo_dmr_5945|7|0.673|0.207	0	.
chr1	37256968	37256984	P0vsP39_P39_hypo_dmr_5947|4|0.738|0.238	0	.
chr1	37265666	37266106	P0vsP39_P39_hypo_dmr_5949|8|0.796|0.405	0	.
chr1	37286762	37289096	P0vsP39_P39_hypo_dmr_5954|31|0.748|0.390	0	.
chr1	37289936	37289966	P0vsP39_P39_hypo_dmr_5955|5|0.846|0.515	0	.
chr1	37298987	37299514	P0vsP39_P39_hypo_dmr_5956|7|0.664|0.364	0	.
chr1	37300645	37301968	P0vsP39_P39_hypo_dmr_5957|31|0.737|0.178	0	.
chr1	37310199	37312854	P0vsP39_P39_hypo_dmr_5960|29|0.905|0.515	0	.
chr1	37333527	37334802	P0vsP39_P39_hypo_dmr_5966|15|0.896|0.541	0	.
chr1	37337213	37337697	P0vsP39_P39_hypo_dmr_5968|12|0.811|0.500	0	.
[truncated: 124,767 more rows]
