# Supplementary material for: Dnmt3a knockout in excitatory neurons impairs postnatal synapse maturation and increases the repressive histone modification H3K27me3
Source: eLife. 2022 May 23;11:e66909. doi: 10.7554/eLife.66909 (PMC9170249; doi:10.7554/eLife.66909)
Supplement: Supplementary file 4. [file elife-66909-supp4.xlsx]

## Sheet: Readme
Supplementary Table 4. Known transcription factor motif enrichment in P39 Dnmt3a cKO DMRs
Motif enrichment analysis was performed using the "findMotifsGenome.pl" tool in HOMER. See the "Methods" section for details.
Raw p-values were adjusted for multiple comparison using the Benjamini and Hochberg method (FDR).
Fold enrichment was calculated by "%target sequences with motif" / "%background sequences with motif".

## Sheet: motif enrichment in DMRs
Motif Name	Consensus	P-value	FDR	# of Target Sequences with Motif (of 222025)	% of Target Sequences with Motif	# of Background Sequences with Motif (of 171270)	% of Background Sequences with Motif	Fold enrichment
Lhx2(Homeobox)/HFSC-Lhx2-ChIP-Seq(GSE48068)/Homer	TAATTAGN	1e-1472	0	89032	0.401	54480.9	0.3181	1.26061
Lhx1(Homeobox)/EmbryoCarcinoma-Lhx1-ChIP-Seq(GSE70957)/Homer	NNYTAATTAR	1e-1283	0	93315	0.4203	58539.5	0.3418	1.22967
Lhx3(Homeobox)/Neuron-Lhx3-ChIP-Seq(GSE31456)/Homer	ADBTAATTAR	1e-785	0	118727	0.5348	80691.6	0.4711	1.13522
Isl1(Homeobox)/Neuron-Isl1-ChIP-Seq(GSE31456)/Homer	CTAATKGV	1e-546	0	119804	0.5396	83334.7	0.4865	1.10915
Nkx6.1(Homeobox)/Islet-Nkx6.1-ChIP-Seq(GSE40975)/Homer	GKTAATGR	1e-473	0	153514	0.6915	110424	0.6447	1.07259
Brn1(POU,Homeobox)/NPC-Brn1-ChIP-Seq(GSE35496)/Homer	TATGCWAATBAV	1e-464	0	26458	0.1192	15397.4	0.0899	1.32592
Oct6(POU,Homeobox)/NPC-Oct6-ChIP-Seq(GSE35496)/Homer	WATGCAAATGAG	1e-407	0	34283	0.1544	21110	0.1232	1.25325
Sox2(HMG)/mES-Sox2-ChIP-Seq(GSE11431)/Homer	BCCATTGTTC	1e-398	0	60506	0.2725	39994.8	0.2335	1.16702
Sox3(HMG)/NPC-Sox3-ChIP-Seq(GSE33059)/Homer	CCWTTGTY	1e-383	0	107576	0.4846	75415.5	0.4403	1.10061
ZFX(Zf)/mES-Zfx-ChIP-Seq(GSE11431)/Homer	AGGCCTRG	1e-316	0	51101	0.2302	33814.7	0.1974	1.16616
Oct4(POU,Homeobox)/mES-Oct4-ChIP-Seq(GSE11431)/Homer	ATTTGCATAW	1e-301	0	37028	0.1668	23779.5	0.1388	1.20173
Sox10(HMG)/SciaticNerve-Sox3-ChIP-Seq(GSE35132)/Homer	CCWTTGTYYB	1e-279	0	100141	0.4511	70834.4	0.4136	1.09067
Zic(Zf)/Cerebellum-ZIC1.2-ChIP-Seq(GSE60731)/Homer	CCTGCTGAGH	1e-260	0	43405	0.1955	28705.2	0.1676	1.16647
Sox15(HMG)/CPA-Sox15-ChIP-Seq(GSE62909)/Homer	RAACAATGGN	1e-255	0	71799	0.3234	49693.5	0.2901	1.11479
OCT4-SOX2-TCF-NANOG(POU,Homeobox,HMG)/mES-Oct4-ChIP-Seq(GSE11431)/Homer	ATTTGCATAACAATG	1e-234	0	16711	0.0753	9986.4	0.0583	1.2916
Sox6(HMG)/Myotubes-Sox6-ChIP-Seq(GSE32627)/Homer	CCATTGTTNY	1e-233	0	100478	0.4526	71647.4	0.4183	1.082
Sox9(HMG)/Limb-SOX9-ChIP-Seq(GSE73225)/Homer	AGGVNCCTTTGT	1e-231	0	55461	0.2498	37811	0.2208	1.13134
ZNF711(Zf)/SHSY5Y-ZNF711-ChIP-Seq(GSE20673)/Homer	AGGCCTAG	1e-225	0	63740	0.2871	44021.5	0.257	1.11712
Sox4(HMG)/proB-Sox4-ChIP-Seq(GSE50066)/Homer	YCTTTGTTCC	1e-179	0	55941	0.252	38753.6	0.2263	1.11357
Otx2(Homeobox)/EpiLC-Otx2-ChIP-Seq(GSE56098)/Homer	NYTAATCCYB	1e-171	0	53543	0.2412	37064.3	0.2164	1.1146
Phox2a(Homeobox)/Neuron-Phox2a-ChIP-Seq(GSE31456)/Homer	YTAATYNRATTA	1e-165	0	32631	0.147	21779.8	0.1272	1.15566
Oct2(POU,Homeobox)/Bcell-Oct2-ChIP-Seq(GSE21512)/Homer	ATATGCAAAT	1e-161	0	22745	0.1025	14713.7	0.0859	1.19325
Unknown-ESC-element(?)/mES-Nanog-ChIP-Seq(GSE11724)/Homer	CACAGCAGGGGG	1e-160	0	30141	0.1358	20030.8	0.1169	1.16168
Nanog(Homeobox)/mES-Nanog-ChIP-Seq(GSE11724)/Homer	RGCCATTAAC	1e-155	0	182894	0.8238	137308	0.8016	1.02769
Pit1(Homeobox)/GCrat-Pit1-ChIP-Seq(GSE58009)/Homer	ATGMATATDC	1e-152	0	72768	0.3278	51714.2	0.3019	1.08579
Brn2(POU,Homeobox)/NPC-Brn2-ChIP-Seq(GSE35496)/Homer	ATGAATATTC	1e-138	0	8466	0.0381	4931.7	0.0288	1.32292
Pbx3(Homeobox)/GM12878-PBX3-ChIP-Seq(GSE32465)/Homer	SCTGTCAMTCAN	1e-133	0	15189	0.0684	9589.3	0.056	1.22143
Pknox1(Homeobox)/ES-Prep1-ChIP-Seq(GSE63282)/Homer	SCTGTCAVTCAV	1e-123	0	13885	0.0625	8755.6	0.0511	1.22309
Pitx1(Homeobox)/Chicken-Pitx1-ChIP-Seq(GSE38910)/Homer	TAATCCCN	1e-97	0	185434	0.8353	140167	0.8183	1.02077
HIF-1b(HLH)/T47D-HIF1b-ChIP-Seq(GSE59937)/Homer	RTACGTGC	1e-83	0	52910	0.2383	37867.5	0.2211	1.07779
GSC(Homeobox)/FrogEmbryos-GSC-ChIP-Seq(DRA000576)/Homer	RGGATTAR	1e-82	0	76259	0.3435	55536.5	0.3242	1.05953
Olig2(bHLH)/Neuron-Olig2-ChIP-Seq(GSE30882)/Homer	RCCATMTGTT	1e-80	0	106624	0.4803	78817.5	0.4602	1.04368
Pit1+1bp(Homeobox)/GCrat-Pit1-ChIP-Seq(GSE58009)/Homer	ATGCATAATTCA	1e-66	0	28368	0.1278	19847.6	0.1159	1.10267
CHR(?)/Hela-CellCycle-Expression/Homer	SRGTTTCAAA	1e-65	0	45075	0.203	32305.2	0.1886	1.07635
Arnt:Ahr(bHLH)/MCF7-Arnt-ChIP-Seq(Lo_et_al.)/Homer	TBGCACGCAA	1e-63	0	28825	0.1298	20234.3	0.1181	1.09907
Tgif1(Homeobox)/mES-Tgif1-ChIP-Seq(GSE55404)/Homer	YTGWCADY	1e-59	0	152329	0.6861	114756	0.67	1.02403
CRX(Homeobox)/Retina-Crx-ChIP-Seq(GSE20012)/Homer	GCTAATCC	1e-57	0	128703	0.5797	96407.1	0.5629	1.02985
EBF1(EBF)/Near-E2A-ChIP-Seq(GSE21512)/Homer	GTCCCCWGGGGA	1e-53	0	43630	0.1965	31458.2	0.1837	1.06968
OCT:OCT(POU,Homeobox,IR1)/NPC-Brn2-ChIP-Seq(GSE35496)/Homer	ATGAATWATTCATGA	1e-51	0	1750	0.0079	919.6	0.0054	1.46296
PAX6(Paired,Homeobox)/Forebrain-Pax6-ChIP-Seq(GSE66961)/Homer	NGTGTTCAVTSAAGCGKAAA	1e-50	0	6088	0.0274	3857	0.0225	1.21778
HIF2a(bHLH)/785_O-HIF2a-ChIP-Seq(GSE34871)/Homer	GCACGTACCC	1e-49	0	16442	0.0741	11317.4	0.0661	1.12103
Meis1(Homeobox)/MastCells-Meis1-ChIP-Seq(GSE48085)/Homer	VGCTGWCAVB	1e-48	0	89349	0.4025	66335.6	0.3873	1.03925
OCT:OCT(POU,Homeobox)/NPC-Brn1-ChIP-Seq(GSE35496)/Homer	ATGAATATTCATGAG	1e-47	0	967	0.0044	450.4	0.0026	1.69231
HIF-1a(bHLH)/MCF7-HIF1a-ChIP-Seq(GSE28352)/Homer	TACGTGCV	1e-42	0	10821	0.0487	7311.1	0.0427	1.14052
PBX1(Homeobox)/MCF7-PBX1-ChIP-Seq(GSE28007)/Homer	GSCTGTCACTCA	1e-41	0	5045	0.0227	3201.1	0.0187	1.2139
Smad4(MAD)/ESC-SMAD4-ChIP-Seq(GSE29422)/Homer	VBSYGTCTGG	1e-40	0	80517	0.3627	59786.7	0.3491	1.03896
SCL(bHLH)/HPC7-Scl-ChIP-Seq(GSE13511)/Homer	AVCAGCTG	1e-38	0	175700	0.7914	133604	0.78	1.01462
Pax7(Paired,Homeobox),long/Myoblast-Pax7-ChIP-Seq(GSE25064)/Homer	TAATCHGATTAC	1e-37	0	2243	0.0101	1305.8	0.0076	1.32895
Smad2(MAD)/ES-SMAD2-ChIP-Seq(GSE29422)/Homer	CTGTCTGG	1e-37	0	78195	0.3522	58118.5	0.3393	1.03802
Eomes(T-box)/H9-Eomes-ChIP-Seq(GSE26097)/Homer	ATTAACACCT	1e-35	0	115977	0.5224	87216.7	0.5092	1.02592
Tbox:Smad(T-box,MAD)/ESCd5-Smad2_3-ChIP-Seq(GSE29422)/Homer	AGGTGHCAGACA	1e-29	0	10850	0.0489	7511.5	0.0439	1.1139
REST-NRSF(Zf)/Jurkat-NRSF-ChIP-Seq/Homer	GGMGCTGTCCATGGTGCTGA	1e-26	0	464	0.0021	207.1	0.0012	1.75
Tgif2(Homeobox)/mES-Tgif2-ChIP-Seq(GSE55404)/Homer	TGTCANYT	1e-25	0	156432	0.7046	118952	0.6945	1.01454
Tbet(T-box)/CD8-Tbet-ChIP-Seq(GSE33802)/Homer	AGGTGTGAAM	1e-24	0	61699	0.2779	45940.2	0.2682	1.03617
Smad3(MAD)/NPC-Smad3-ChIP-Seq(GSE36673)/Homer	TWGTCTGV	1e-24	0	134729	0.6069	102122	0.5962	1.01795
Gfi1b(Zf)/HPC7-Gfi1b-ChIP-Seq(GSE22178)/Homer	MAATCACTGC	1e-23	0	37470	0.1688	27554.8	0.1609	1.0491
Pax7(Paired,Homeobox),longest/Myoblast-Pax7-ChIP-Seq(GSE25064)/Homer	NTAATTDGCYAATTANNWWD	1e-22	0	2583	0.0116	1633.4	0.0095	1.22105
PAX3:FKHR-fusion(Paired,Homeobox)/Rh4-PAX3:FKHR-ChIP-Seq(GSE19063)/Homer	ACCRTGACTAATTNN	1e-18	0	13786	0.0621	9865.2	0.0576	1.07812
Rfx2(HTH)/LoVo-RFX2-ChIP-Seq(GSE49402)/Homer	GTTGCCATGGCAACM	1e-18	0	5057	0.0228	3435	0.0201	1.13433
RFX(HTH)/K562-RFX3-ChIP-Seq(SRA012198)/Homer	CGGTTGCCATGGCAAC	1e-17	0	4329	0.0195	2926.7	0.0171	1.14035
Rfx1(HTH)/NPC-H3K4me1-ChIP-Seq(GSE16256)/Homer	KGTTGCCATGGCAA	1e-16	0	10774	0.0485	7670.2	0.0448	1.08259
X-box(HTH)/NPC-H3K4me1-ChIP-Seq(GSE16256)/Homer	GGTTGCCATGGCAA	1e-16	0	6844	0.0308	4770.2	0.0278	1.10791
NeuroD1(bHLH)/Islet-NeuroD1-ChIP-Seq(GSE30298)/Homer	GCCATCTGTT	1e-15	0	45113	0.2032	33616	0.1963	1.03515
Brachyury(T-box)/Mesoendoderm-Brachyury-ChIP-exo(GSE54963)/Homer	ANTTMRCASBNNNGTGYKAAN	1e-15	0	17370	0.0782	12636.8	0.0738	1.05962
Pax7(Paired,Homeobox)/Myoblast-Pax7-ChIP-Seq(GSE25064)/Homer	TAATCAATTA	1e-13	0	7988	0.036	5661.6	0.0331	1.08761
AP-2gamma(AP2)/MCF7-TFAP2C-ChIP-Seq(GSE21234)/Homer	SCCTSAGGSCAW	1e-13	0	36988	0.1666	27535.8	0.1608	1.03607
Rbpj1(?)/Panc1-Rbpj1-ChIP-Seq(GSE47459)/Homer	HTTTCCCASG	1e-13	0	77098	0.3473	58213.9	0.3399	1.02177
AP-2alpha(AP2)/Hela-AP2alpha-ChIP-Seq(GSE31477)/Homer	ATGCCCTGAGGC	1e-12	0	27506	0.1239	20358.8	0.1189	1.04205
EBF(EBF)/proBcell-EBF-ChIP-Seq(GSE21978)/Homer	DGTCCCYRGGGA	1e-10	0	9290	0.0418	6705.2	0.0391	1.06905
Oct4:Sox17(POU,Homeobox,HMG)/F9-Sox17-ChIP-Seq(GSE44553)/Homer	CCATTGTATGCAAAT	1e-10	0	10465	0.0471	7591.2	0.0443	1.06321
Foxh1(Forkhead)/hESC-FOXH1-ChIP-Seq(GSE29422)/Homer	NNTGTGGATTSS	1e-09	0	38029	0.1713	28488.5	0.1663	1.03007
NFY(CCAAT)/Promoter/Homer	RGCCAATSRG	1e-08	0	37811	0.1703	28397.5	0.1658	1.02714
GLI3(Zf)/Limb-GLI3-ChIP-Chip(GSE11077)/Homer	CGTGGGTGGTCC	1e-07	0	4566	0.0206	3246.3	0.019	1.08421
ZNF675(Zf)/HEK293-ZNF675.GFP-ChIP-Seq(GSE58341)/Homer	ARGAGGMCAAAATGW	1e-06	0	7787	0.0351	5669.3	0.0331	1.06042
E2F6(E2F)/Hela-E2F6-ChIP-Seq(GSE31477)/Homer	GGCGGGAARN	1e-06	0	12064	0.0543	8903	0.052	1.04423
TATA-Box(TBP)/Promoter/Homer	CCTTTTAWAGSC	1e-05	0	80309	0.3617	61182.4	0.3572	1.0126
YY1(Zf)/Promoter/Homer	CAAGATGGCGGC	1e-05	0	1716	0.0077	1190.2	0.0069	1.11594
ZNF264(Zf)/HEK293-ZNF264.GFP-ChIP-Seq(GSE58341)/Homer	RGGGCACTAACY	0.0001	0.0001	29301	0.132	22091.8	0.129	1.02326
PAX5(Paired,Homeobox)/GM12878-PAX5-ChIP-Seq(GSE32465)/Homer	GCAGCCAAGCRTGACH	0.0001	0.0001	16467	0.0742	12311.7	0.0719	1.03199
Atoh1(bHLH)/Cerebellum-Atoh1-ChIP-Seq(GSE22111)/Homer	VNRVCAGCTGGY	0.0001	0.0001	58186	0.2621	44244	0.2583	1.01471
ZNF165(Zf)/WHIM12-ZNF165-ChIP-Seq(GSE65937)/Homer	AAGGKGRCGCAGGCA	0.0001	0.0003	3831	0.0173	2779.8	0.0162	1.0679
ZNF322(Zf)/HEK293-ZNF322.GFP-ChIP-Seq(GSE58341)/Homer	GAGCCTGGTACTGWGCCTGR	0.0001	0.0003	11870	0.0535	8851.6	0.0517	1.03482
STAT6(Stat)/CD4-Stat6-ChIP-Seq(GSE22104)/Homer	ABTTCYYRRGAA	0.001	0.0006	34392	0.1549	26063.1	0.1522	1.01774
ZNF41(Zf)/HEK293-ZNF41.GFP-ChIP-Seq(GSE58341)/Homer	CCTCATGGTGYCYTWYTCCCTTGTG	0.001	0.0009	1274	0.0057	890.6	0.0052	1.09615
IRF:BATF(IRF:bZIP)/pDC-Irf8-ChIP-Seq(GSE66899)/Homer	CTTTCANTATGACTV	0.001	0.0019	8509	0.0383	6338.6	0.037	1.03514
ZNF692(Zf)/HEK293-ZNF692.GFP-ChIP-Seq(GSE58341)/Homer	GTGGGCCCCA	0.001	0.0019	3967	0.0179	2905.5	0.017	1.05294
Pax8(Paired,Homeobox)/Thyroid-Pax8-ChIP-Seq(GSE26938)/Homer	GTCATGCHTGRCTGS	0.001	0.0027	14790	0.0666	11126	0.065	1.02462
STAT6(Stat)/Macrophage-Stat6-ChIP-Seq(GSE38377)/Homer	TTCCKNAGAA	0.01	0.0101	34301	0.1545	26101.3	0.1524	1.01378
Zfp809(Zf)/ES-Zfp809-ChIP-Seq(GSE70799)/Homer	GGGGCTYGKCTGGGA	0.01	0.0133	6132	0.0276	4573.9	0.0267	1.03371
NFAT(RHD)/Jurkat-NFATC1-ChIP-Seq(Jolma_et_al.)/Homer	ATTTTCCATT	0.01	0.0162	52863	0.2381	40382.8	0.2358	1.00975
ZNF189(Zf)/HEK293-ZNF189.GFP-ChIP-Seq(GSE58341)/Homer	TGGAACAGMA	0.01	0.0215	42493	0.1914	32427.3	0.1893	1.01109
NF1-halfsite(CTF)/LNCaP-NF1-ChIP-Seq(Unpublished)/Homer	YTGCCAAG	0.01	0.022	90001	0.4054	68993.9	0.4028	1.00645
Srebp1a(bHLH)/HepG2-Srebp1a-ChIP-Seq(GSE31477)/Homer	RTCACSCCAY	0.01	0.029	8792	0.0396	6615.6	0.0386	1.02591
Tbx20(T-box)/Heart-Tbx20-ChIP-Seq(GSE29636)/Homer	GGTGYTGACAGS	0.01	0.0306	11915	0.0537	9000.3	0.0525	1.02286
ZNF16(Zf)/HEK293-ZNF16.GFP-ChIP-Seq(GSE58341)/Homer	MACCTTCYATGGCTCCCTAKTGCCY	0.01	0.0323	287	0.0013	192.4	0.0011	1.18182
ZNF143|STAF(Zf)/CUTLL-ZNF143-ChIP-Seq(GSE29600)/Homer	ATTTCCCAGVAKSCY	0.1	0.0581	16670	0.0751	12660.7	0.0739	1.01624
ZNF519(Zf)/HEK293-ZNF519.GFP-ChIP-Seq(GSE58341)/Homer	GAGSCCGAGC	0.1	0.2008	5870	0.0264	4439.8	0.0259	1.01931
E2F1(E2F)/Hela-E2F1-ChIP-Seq(GSE22478)/Homer	CWGGCGGGAA	0.1	0.2341	2956	0.0133	2220.9	0.013	1.02308
Bapx1(Homeobox)/VertebralCol-Bapx1-ChIP-Seq(GSE36672)/Homer	TTRAGTGSYK	0.1	0.2341	107299	0.4833	82518.7	0.4818	1.00311
NFkB-p50,p52(RHD)/Monocyte-p50-ChIP-Chip(Schreiber_et_al.)/Homer	GGGGGAATCCCC	0.1	0.2836	3363	0.0151	2536	0.0148	1.02027
ZSCAN22(Zf)/HEK293-ZSCAN22.GFP-ChIP-Seq(GSE58341)/Homer	SMCAGTCWGAKGGAGGAGGC	1	0.3227	2846	0.0128	2144.7	0.0125	1.024
ZNF415(Zf)/HEK293-ZNF415.GFP-ChIP-Seq(GSE58341)/Homer	GRTGMTRGAGCC	1	0.4357	20726	0.0934	15876.7	0.0927	1.00755
Nkx2.5(Homeobox)/HL1-Nkx2.5.biotin-ChIP-Seq(GSE21529)/Homer	RRSCACTYAA	1	0.5664	109133	0.4916	84034	0.4906	1.00204
PRDM14(Zf)/H1-PRDM14-ChIP-Seq(GSE22767)/Homer	RGGTCTCTAACY	1	0.7132	16215	0.073	12441.4	0.0726	1.00551
GFX(?)/Promoter/Homer	ATTCTCGCGAGA	1	0.7437	91	0.0004	66	0.0004	1
ZFP3(Zf)/HEK293-ZFP3.GFP-ChIP-Seq(GSE58341)/Homer	GGGTTTTGAAGGATGARTAGGAGTT	1	0.914	76	0.0003	55.8	0.0003	1
NFkB-p65(RHD)/GM12787-p65-ChIP-Seq(GSE19485)/Homer	WGGGGATTTCCC	1	0.9586	23573	0.1062	18135.8	0.1059	1.00283
Rfx5(HTH)/GM12878-Rfx5-ChIP-Seq(GSE31477)/Homer	SCCTAGCAACAG	1	1	18064	0.0814	13896.2	0.0811	1.0037
AR-halfsite(NR)/LNCaP-AR-ChIP-Seq(GSE27824)/Homer	CCAGGAACAG	1	1	162149	0.7304	125050	0.7301	1.00041
Znf263(Zf)/K562-Znf263-ChIP-Seq(GSE31477)/Homer	CVGTSCTCCC	1	1	70311	0.3167	54215.7	0.3165	1.00063
ZNF317(Zf)/HEK293-ZNF317.GFP-ChIP-Seq(GSE58341)/Homer	GTCWGCTGTYYCTCT	1	1	4638	0.0209	3569.6	0.0208	1.00481
PR(NR)/T47D-PR-ChIP-Seq(GSE31130)/Homer	VAGRACAKNCTGTBC	1	1	114750	0.5169	88505.5	0.5167	1.00039
CEBP:CEBP(bZIP)/MEF-Chop-ChIP-Seq(GSE35681)/Homer	NTNATGCAAYMNNHTGMAAY	1	1	8975	0.0404	6919.2	0.0404	1
Unknown(Homeobox)/Limb-p300-ChIP-Seq/Homer	SSCMATWAAA	1	1	47822	0.2154	36906.5	0.2155	0.999536
bZIP:IRF(bZIP,IRF)/Th17-BatF-ChIP-Seq(GSE39756)/Homer	NAGTTTCABTHTGACTNW	1	1	31914	0.1438	24662.5	0.144	0.998611
ZBTB33(Zf)/GM12878-ZBTB33-ChIP-Seq(GSE32465)/Homer	GGVTCTCGCGAGAAC	1	1	269	0.0012	214.9	0.0013	0.923077
PRDM9(Zf)/Testis-DMC1-ChIP-Seq(GSE35498)/Homer	ADGGYAGYAGCATCT	1	1	19144	0.0862	14841.9	0.0867	0.994233
Tcf4(HMG)/Hct116-Tcf4-ChIP-Seq(SRA012054)/Homer	ASATCAAAGGVA	1	1	31992	0.1441	24791.1	0.1447	0.995853
Srebp2(bHLH)/HepG2-Srebp2-ChIP-Seq(GSE31477)/Homer	CGGTCACSCCAC	1	1	5055	0.0228	3949.9	0.0231	0.987013
PGR(NR)/EndoStromal-PGR-ChIP-Seq(GSE69539)/Homer	AAGAACATWHTGTTC	1	1	14919	0.0672	11599.7	0.0677	0.992614
ZNF528(Zf)/HEK293-ZNF528.GFP-ChIP-Seq(GSE58341)/Homer	AGAAATGACTTCCCT	1	1	375	0.0017	305.5	0.0018	0.944444
E2F4(E2F)/K562-E2F4-ChIP-Seq(GSE31477)/Homer	GGCGGGAAAH	1	1	7189	0.0324	5622.9	0.0328	0.987805
Mouse_Recombination_Hotspot(Zf)/Testis-DMC1-ChIP-Seq(GSE24438)/Homer	ACTYKNATTCGTGNTACTTC	1	1	3816	0.0172	3009.1	0.0176	0.977273
ZNF136(Zf)/HEK293-ZNF136.GFP-ChIP-Seq(GSE58341)/Homer	YTKGATAHAGTATTCTWGGTNGGCA	1	1	5682	0.0256	4465.8	0.0261	0.980843
ZNF416(Zf)/HEK293-ZNF416.GFP-ChIP-Seq(GSE58341)/Homer	WDNCTGGGCA	1	1	61411	0.2766	47611.9	0.278	0.994964
Nkx2.2(Homeobox)/NPC-Nkx2.2-ChIP-Seq(GSE61673)/Homer	BTBRAGTGSN	1	1	93723	0.4222	72656.8	0.4242	0.995285
CEBP:AP1(bZIP)/ThioMac-CEBPb-ChIP-Seq(GSE21512)/Homer	DRTGTTGCAA	1	1	44277	0.1994	34473.2	0.2013	0.990561
FOXA1:AR(Forkhead,NR)/LNCAP-AR-ChIP-Seq(GSE27824)/Homer	AGTAAACAAAAAAGAACAND	1	1	6102	0.0275	4843.9	0.0283	0.971731
AMYB(HTH)/Testes-AMYB-ChIP-Seq(GSE44588)/Homer	TGGCAGTTGG	1	1	81072	0.3652	62954.5	0.3675	0.993741
Tbx5(T-box)/HL1-Tbx5.biotin-ChIP-Seq(GSE21529)/Homer	AGGTGTCA	1	1	137360	0.6187	106503	0.6218	0.995014
RBPJ:Ebox(?,bHLH)/Panc1-Rbpj1-ChIP-Seq(GSE47459)/Homer	GGGRAARRGRMCAGMTG	1	1	16473	0.0742	13000	0.0759	0.977602
ZNF467(Zf)/HEK293-ZNF467.GFP-ChIP-Seq(GSE58341)/Homer	TGGGGAAGGGCM	1	1	35241	0.1587	27594.5	0.1611	0.985102
BMYB(HTH)/Hela-BMYB-ChIP-Seq(GSE27030)/Homer	NHAACBGYYV	1	1	82590	0.372	64254.5	0.3751	0.991736
NRF(NRF)/Promoter/Homer	STGCGCATGCGC	1	1	3587	0.0162	2914.5	0.017	0.952941
EBNA1(EBV-virus)/Raji-EBNA1-ChIP-Seq(GSE30709)/Homer	GGYAGCAYDTGCTDCCCNNN	1	1	610	0.0027	537	0.0031	0.870968
Nkx3.1(Homeobox)/LNCaP-Nkx3.1-ChIP-Seq(GSE28264)/Homer	AAGCACTTAA	1	1	117002	0.527	90887.9	0.5306	0.993215
E2F7(E2F)/Hela-E2F7-ChIP-Seq(GSE32673)/Homer	VDTTTCCCGCCA	1	1	1394	0.0063	1177.1	0.0069	0.913043
CArG(MADS)/PUER-Srf-ChIP-Seq(Sullivan_et_al.)/Homer	CCATATATGGNM	1	1	15705	0.0707	12455.9	0.0727	0.97249
HRE(HSF)/Striatum-HSF1-ChIP-Seq(GSE38000)/Homer	TTCTAGAABNTTCTA	1	1	12603	0.0568	10053.9	0.0587	0.967632
Nkx2.1(Homeobox)/LungAC-Nkx2.1-ChIP-Seq(GSE43252)/Homer	RSCACTYRAG	1	1	132055	0.5948	102592	0.599	0.992988
Chop(bZIP)/MEF-Chop-ChIP-Seq(GSE35681)/Homer	ATTGCATCAT	1	1	12147	0.0547	9713.3	0.0567	0.964727
ZNF382(Zf)/HEK293-ZNF382.GFP-ChIP-Seq(GSE58341)/Homer	GNCTGTASTRNTGBCTCHTT	1	1	1472	0.0066	1267.1	0.0074	0.891892
GFY(?)/Promoter/Homer	ACTACAATTCCC	1	1	2071	0.0093	1760.5	0.0103	0.902913
PRDM1(Zf)/Hela-PRDM1-ChIP-Seq(GSE31477)/Homer	ACTTTCACTTTC	1	1	33423	0.1505	26376.6	0.154	0.977273
GRE(NR),IR3/RAW264.7-GRE-ChIP-Seq(Unpublished)/Homer	VAGRACAKWCTGTYC	1	1	12870	0.058	10331.4	0.0603	0.961857
ZNF669(Zf)/HEK293-ZNF669.GFP-ChIP-Seq(GSE58341)/Homer	GARTGGTCATCGCCC	1	1	1982	0.0089	1697.5	0.0099	0.89899
TCFL2(HMG)/K562-TCF7L2-ChIP-Seq(GSE29196)/Homer	ACWTCAAAGG	1	1	6164	0.0278	5057.6	0.0295	0.942373
MafF(bZIP)/HepG2-MafF-ChIP-Seq(GSE31477)/Homer	HWWGTCAGCAWWTTT	1	1	17147	0.0772	13738.5	0.0802	0.962594
E2F(E2F)/Hela-CellCycle-Expression/Homer	TTSGCGCGAAAA	1	1	688	0.0031	644.1	0.0038	0.815789
NFAT:AP1(RHD,bZIP)/Jurkat-NFATC1-ChIP-Seq(Jolma_et_al.)/Homer	SARTGGAAAAWRTGAGTCAB	1	1	10110	0.0455	8214	0.048	0.947917
HRE(HSF)/HepG2-HSF1-ChIP-Seq(GSE31477)/Homer	BSTTCTRGAABVTTCYAGAA	1	1	7346	0.0331	6034.1	0.0352	0.940341
ARE(NR)/LNCAP-AR-ChIP-Seq(GSE27824)/Homer	RGRACASNSTGTYCYB	1	1	13525	0.0609	10926.5	0.0638	0.954545
GFY-Staf(?,Zf)/Promoter/Homer	RACTACAATTCCCAGAAKGC	1	1	1414	0.0064	1266.3	0.0074	0.864865
Tcfcp2l1(CP2)/mES-Tcfcp2l1-ChIP-Seq(GSE11431)/Homer	NRAACCRGTTYRAACCRGYT	1	1	6516	0.0294	5393.5	0.0315	0.933333
DMRT1(DM)/Testis-DMRT1-ChIP-Seq(GSE64892)/Homer	TWGHWACAWTGTWDC	1	1	16161	0.0728	13044.6	0.0762	0.955381
GRE(NR),IR3/A549-GR-ChIP-Seq(GSE32465)/Homer	NRGVACABNVTGTYCY	1	1	6589	0.0297	5464.9	0.0319	0.931034
p53(p53)/mES-cMyc-ChIP-Seq(GSE11431)/Homer	ACATGCCCGGGCAT	1	1	603	0.0027	590.9	0.0034	0.794118
MYB(HTH)/ERMYB-Myb-ChIPSeq(GSE22095)/Homer	GGCVGTTR	1	1	89080	0.4013	69880.8	0.408	0.983578
Atf4(bZIP)/MEF-Atf4-ChIP-Seq(GSE35681)/Homer	MTGATGCAAT	1	1	15681	0.0706	12720.6	0.0743	0.950202
Tcf3(HMG)/mES-Tcf3-ChIP-Seq(GSE11724)/Homer	ASWTCAAAGG	1	1	18484	0.0833	14932.6	0.0872	0.955275
STAT1(Stat)/HelaS3-STAT1-ChIP-Seq(GSE12782)/Homer	NATTTCCNGGAAAT	1	1	18323	0.0825	14806.5	0.0864	0.954861
BMAL1(bHLH)/Liver-Bmal1-ChIP-Seq(GSE39860)/Homer	GNCACGTG	1	1	91056	0.4102	71445.8	0.4171	0.983457
STAT5(Stat)/mCD4+-Stat5-ChIP-Seq(GSE12346)/Homer	RTTTCTNAGAAA	1	1	21610	0.0973	17423.6	0.1017	0.956735
DMRT6(DM)/Testis-DMRT6-ChIP-Seq(GSE60440)/Homer	YDGHTACAWTGTADC	1	1	12995	0.0585	10635.3	0.0621	0.942029
Bcl6(Zf)/Liver-Bcl6-ChIP-Seq(GSE31578)/Homer	NNNCTTTCCAGGAAA	1	1	75823	0.3415	59713.6	0.3486	0.979633
NFkB-p65-Rel(RHD)/ThioMac-LPS-Expression(GSE23622)/Homer	GGAAATTCCC	1	1	2839	0.0128	2496	0.0146	0.876712
c-Myc(bHLH)/mES-cMyc-ChIP-Seq(GSE11431)/Homer	VVCCACGTGG	1	1	22848	0.1029	18444.1	0.1077	0.955432
STAT4(Stat)/CD4-Stat4-ChIP-Seq(GSE22104)/Homer	NYTTCCWGGAAR	1	1	56941	0.2565	45102	0.2633	0.974174
PAX5(Paired,Homeobox),condensed/GM12878-PAX5-ChIP-Seq(GSE32465)/Homer	GTCACGCTCSCTGM	1	1	3976	0.0179	3445.6	0.0201	0.890547
HOXD13(Homeobox)/Chicken-Hoxd13-ChIP-Seq(GSE38910)/Homer	NCYAATAAAA	1	1	77214	0.3478	60901.3	0.3556	0.978065
GATA3(Zf),DR8/iTreg-Gata3-ChIP-Seq(GSE20898)/Homer	AGATSTNDNNDSAGATAASN	1	1	4481	0.0202	3872.5	0.0226	0.893805
Six1(Homeobox)/Myoblast-Six1-ChIP-Chip(GSE20150)/Homer	GKVTCADRTTWC	1	1	14251	0.0642	11742.2	0.0686	0.93586
AP-1(bZIP)/ThioMac-PU.1-ChIP-Seq(GSE21512)/Homer	VTGACTCATC	1	1	35274	0.1589	36446.9	0.2128	0.746711
Ap4(bHLH)/AML-Tfap4-ChIP-Seq(GSE45738)/Homer	NAHCAGCTGD	1	1	59007	0.2658	48653.4	0.2841	0.935586
Ascl1(bHLH)/NeuralTubes-Ascl1-ChIP-Seq(GSE55840)/Homer	NNVVCAGCTGBN	1	1	70081	0.3157	56585.2	0.3304	0.955508
Atf1(bZIP)/K562-ATF1-ChIP-Seq(GSE31477)/Homer	GATGACGTCA	1	1	31808	0.1433	26756.6	0.1562	0.917414
Atf2(bZIP)/3T3L1-Atf2-ChIP-Seq(GSE56872)/Homer	NRRTGACGTCAT	1	1	14491	0.0653	12898.5	0.0753	0.867198
Atf3(bZIP)/GBM-ATF3-ChIP-Seq(GSE33912)/Homer	DATGASTCATHN	1	1	31451	0.1417	33719.7	0.1969	0.719655
Atf7(bZIP)/3T3L1-Atf7-ChIP-Seq(GSE56872)/Homer	NGRTGACGTCAY	1	1	21413	0.0965	18623.2	0.1087	0.887764
Bach1(bZIP)/K562-Bach1-ChIP-Seq(GSE31477)/Homer	AWWNTGCTGAGTCAT	1	1	2295	0.0103	3142.4	0.0183	0.562842
Bach2(bZIP)/OCILy7-Bach2-ChIP-Seq(GSE44420)/Homer	TGCTGAGTCA	1	1	7684	0.0346	9699.9	0.0566	0.611307
BATF(bZIP)/Th17-BATF-ChIP-Seq(GSE39756)/Homer	DATGASTCAT	1	1	31297	0.141	33644.2	0.1964	0.717923
bHLHE40(bHLH)/HepG2-BHLHE40-ChIP-Seq(GSE31477)/Homer	KCACGTGMCN	1	1	12302	0.0554	10690.9	0.0624	0.887821
BORIS(Zf)/K562-CTCFL-ChIP-Seq(GSE32465)/Homer	CNNBRGCGCCCCCTGSTGGC	1	1	4157	0.0187	6040.5	0.0353	0.529745
Cdx2(Homeobox)/mES-Cdx2-ChIP-Seq(GSE14586)/Homer	GYMATAAAAH	1	1	48540	0.2186	43709.2	0.2552	0.856583
CEBP(bZIP)/ThioMac-CEBPb-ChIP-Seq(GSE21512)/Homer	ATTGCGCAAC	1	1	37527	0.169	31792.8	0.1856	0.91056
CLOCK(bHLH)/Liver-Clock-ChIP-Seq(GSE39860)/Homer	GHCACGTG	1	1	24953	0.1124	21378.5	0.1248	0.900641
c-Myc(bHLH)/LNCAP-cMyc-ChIP-Seq(Unpublished)/Homer	VCCACGTG	1	1	16090	0.0725	14084.4	0.0822	0.881995
CRE(bZIP)/Promoter/Homer	CSGTGACGTCAC	1	1	7646	0.0344	6485.2	0.0379	0.907652
CTCF(Zf)/CD4+-CTCF-ChIP-Seq(Barski_et_al.)/Homer	AYAGTGCCMYCTRGTGGCCA	1	1	3197	0.0144	5359.5	0.0313	0.460064
CTCF-SatelliteElement(Zf?)/CD4+-CTCF-ChIP-Seq(Barski_et_al.)/Homer	TGCAGTTCCMVNWRTGGCCA	1	1	600	0.0027	645.6	0.0038	0.710526
RAR:RXR(NR),DR5/ES-RAR-ChIP-Seq(GSE56893)/Homer	AGGTCAAGGTCA	1	1	6683	0.0301	7075.6	0.0413	0.728814
RAR:RXR(NR),DR5/ES-RAR-ChIP-Seq(GSE56893)/Homer	RGGTCADNNAGAGGTCAV	1	1	1009	0.0045	1183.2	0.0069	0.652174
E2A(bHLH)/proBcell-E2A-ChIP-Seq(GSE21978)/Homer	DNRCAGCTGY	1	1	60346	0.2718	52063.1	0.304	0.894079
E2A(bHLH),near_PU.1/Bcell-PU.1-ChIP-Seq(GSE21512)/Homer	NVCACCTGBN	1	1	54012	0.2433	47152	0.2753	0.883763
E-box(bHLH)/Promoter/Homer	SSGGTCACGTGA	1	1	2155	0.0097	2233.8	0.013	0.746154
Egr1(Zf)/K562-Egr1-ChIP-Seq(GSE32465)/Homer	TGCGTGGGYG	1	1	18994	0.0856	18858.5	0.1101	0.777475
Egr2(Zf)/Thymocytes-Egr2-ChIP-Seq(GSE34254)/Homer	NGCGTGGGCGGR	1	1	3050	0.0137	4280.7	0.025	0.548
EHF(ETS)/LoVo-EHF-ChIP-Seq(GSE49402)/Homer	AVCAGGAAGT	1	1	67708	0.305	64532	0.3768	0.809448
EKLF(Zf)/Erythrocyte-Klf1-ChIP-Seq(GSE20478)/Homer	NWGGGTGTGGCY	1	1	7156	0.0322	8358.4	0.0488	0.659836
ELF1(ETS)/Jurkat-ELF1-ChIP-Seq(SRA014231)/Homer	AVCCGGAAGT	1	1	18084	0.0815	20395.7	0.1191	0.684299
ELF5(ETS)/T47D-ELF5-ChIP-Seq(GSE30407)/Homer	ACVAGGAAGT	1	1	38489	0.1734	39670.7	0.2316	0.748705
Elk1(ETS)/Hela-Elk1-ChIP-Seq(GSE31477)/Homer	HACTTCCGGY	1	1	19425	0.0875	21108.1	0.1232	0.710227
Elk4(ETS)/Hela-Elk4-ChIP-Seq(GSE31477)/Homer	NRYTTCCGGY	1	1	19984	0.09	20818	0.1215	0.740741
ERE(NR),IR3/MCF7-ERa-ChIP-Seq(Unpublished)/Homer	VAGGTCACNSTGACC	1	1	11451	0.0516	10030.3	0.0586	0.880546
ERG(ETS)/VCaP-ERG-ChIP-Seq(GSE14097)/Homer	ACAGGAAGTG	1	1	79473	0.358	75027	0.438	0.817352
Erra(NR)/HepG2-Erra-ChIP-Seq(GSE31477)/Homer	CAAAGGTCAG	1	1	92358	0.416	80196	0.4682	0.888509
Esrrb(NR)/mES-Esrrb-ChIP-Seq(GSE11431)/Homer	KTGACCTTGA	1	1	28874	0.1301	30215	0.1764	0.737528
ETS1(ETS)/Jurkat-ETS1-ChIP-Seq(GSE17954)/Homer	ACAGGAAGTG	1	1	49978	0.2251	51442.3	0.3003	0.749584
Ets1-distal(ETS)/CD4+-PolII-ChIP-Seq(Barski_et_al.)/Homer	MACAGGAAGT	1	1	16562	0.0746	20282.2	0.1184	0.630068
ETS:E-box(ETS,bHLH)/HPC7-Scl-ChIP-Seq(GSE22178)/Homer	AGGAARCAGCTG	1	1	5074	0.0229	4738.3	0.0277	0.826715
ETS(ETS)/Promoter/Homer	AACCGGAAGT	1	1	11502	0.0518	14264.3	0.0833	0.621849
ETS:RUNX(ETS,Runt)/Jurkat-RUNX1-ChIP-Seq(GSE17954)/Homer	RCAGGATGTGGT	1	1	3131	0.0141	4148.1	0.0242	0.582645
ETV1(ETS)/GIST48-ETV1-ChIP-Seq(GSE22441)/Homer	AACCGGAAGT	1	1	64522	0.2906	63667.4	0.3717	0.781813
Etv2(ETS)/ES-ER71-ChIP-Seq(GSE59402)/Homer(0.967)	NNAYTTCCTGHN	1	1	47237	0.2128	50084.2	0.2924	0.72777
EWS:ERG-fusion(ETS)/CADO_ES1-EWS:ERG-ChIP-Seq(SRA014231)/Homer	ATTTCCTGTN	1	1	42439	0.1912	43308.5	0.2528	0.756329
EWS:FLI1-fusion(ETS)/SK_N_MC-EWS:FLI1-ChIP-Seq(SRA014231)/Homer	VACAGGAAAT	1	1	28507	0.1284	31276.7	0.1826	0.703176
Fli1(ETS)/CD8-FLI-ChIP-Seq(GSE20898)/Homer	NRYTTCCGGH	1	1	50384	0.2269	51086.4	0.2983	0.760644
Fosl2(bZIP)/3T3L1-Fosl2-ChIP-Seq(GSE56872)/Homer	NATGASTCABNN	1	1	13203	0.0595	17433.9	0.1018	0.584479
FOXA1(Forkhead)/LNCAP-FOXA1-ChIP-Seq(GSE27824)/Homer	WAAGTAAACA	1	1	84191	0.3792	75702.8	0.442	0.857919
FOXA1(Forkhead)/MCF7-FOXA1-ChIP-Seq(GSE26831)/Homer	WAAGTAAACA	1	1	71942	0.3241	66257.3	0.3868	0.837901
Foxa2(Forkhead)/Liver-Foxa2-ChIP-Seq(GSE25694)/Homer	CYTGTTTACWYW	1	1	53611	0.2415	50548.5	0.2951	0.818367
Fox:Ebox(Forkhead,bHLH)/Panc1-Foxa2-ChIP-Seq(GSE47459)/Homer	NNNVCTGWGYAAACASN	1	1	66509	0.2996	58981.2	0.3443	0.870171
FoxL2(Forkhead)/Ovary-FoxL2-ChIP-Seq(GSE60858)/Homer	WWTRTAAACAVG	1	1	60427	0.2722	54872.4	0.3204	0.849563
FOXM1(Forkhead)/MCF7-FOXM1-ChIP-Seq(GSE72977)/Homer	TRTTTACTTW	1	1	72594	0.327	66778.4	0.3899	0.838677
Foxo1(Forkhead)/RAW-Foxo1-ChIP-Seq(Fan_et_al.)/Homer	CTGTTTAC	1	1	105573	0.4755	87414.1	0.5103	0.931805
FOXP1(Forkhead)/H9-FOXP1-ChIP-Seq(GSE31006)/Homer	NYYTGTTTACHN	1	1	30491	0.1373	28846.2	0.1684	0.815321
Fra1(bZIP)/BT549-Fra1-ChIP-Seq(GSE46166)/Homer	NNATGASTCATH	1	1	26518	0.1194	29519.5	0.1723	0.692977
FXR(NR),IR1/Liver-FXR-ChIP-Seq(Chong_et_al.)/Homer	AGGTCANTGACCTB	1	1	14717	0.0663	12687.2	0.0741	0.894737
GABPA(ETS)/Jurkat-GABPa-ChIP-Seq(GSE17954)/Homer	RACCGGAAGT	1	1	40893	0.1842	43280.8	0.2527	0.728928
Gata2(Zf)/K562-GATA2-ChIP-Seq(GSE18829)/Homer	BBCTTATCTS	1	1	38465	0.1733	43251.5	0.2525	0.686337
GATA3(Zf),DR4/iTreg-Gata3-ChIP-Seq(GSE20898)/Homer	AGATGKDGAGATAAG	1	1	5274	0.0238	5094.6	0.0297	0.801347
GATA(Zf),IR3/iTreg-Gata3-ChIP-Seq(GSE20898)/Homer	NNNNNBAGATAWYATCTVHN	1	1	8401	0.0378	7845.2	0.0458	0.825328
GATA(Zf),IR4/iTreg-Gata3-ChIP-Seq(GSE20898)/Homer	NAGATWNBNATCTNN	1	1	4691	0.0211	4795	0.028	0.753571
GATA3(Zf)/iTreg-Gata3-ChIP-Seq(GSE20898)/Homer	AGATAASR	1	1	87679	0.3949	82771.2	0.4832	0.81726
Gata4(Zf)/Heart-Gata4-ChIP-Seq(GSE35151)/Homer	NBWGATAAGR	1	1	60353	0.2719	60998.5	0.3561	0.76355
Gata1(Zf)/K562-GATA1-ChIP-Seq(GSE18829)/Homer	SAGATAAGRV	1	1	33466	0.1507	39022.1	0.2278	0.661545
GATA:SCL(Zf,bHLH)/Ter119-SCL-ChIP-Seq(GSE18720)/Homer	CRGCTGBNGNSNNSAGATAA	1	1	6440	0.029	5935.6	0.0347	0.835735
GRHL2(CP2)/HBE-GRHL2-ChIP-Seq(GSE46194)/Homer	AAACYKGTTWDACMRGTTTB	1	1	19046	0.0858	16933.5	0.0989	0.867543
HEB(bHLH)/mES-Heb-ChIP-Seq(GSE53233)/Homer	VCAGCTGBNN	1	1	81019	0.3649	67275.8	0.3928	0.928971
Hnf1(Homeobox)/Liver-Foxa2-Chip-Seq(GSE25694)/Homer	GGTTAAWCATTAA	1	1	10411	0.0469	10967.3	0.064	0.732812
HNF4a(NR),DR1/HepG2-HNF4a-ChIP-Seq(GSE25021)/Homer	CARRGKBCAAAGTYCA	1	1	23051	0.1038	23212.2	0.1355	0.766052
HNF6(Homeobox)/Liver-Hnf6-ChIP-Seq(ERP000394)/Homer	NTATYGATCH	1	1	32262	0.1453	27950.3	0.1632	0.890319
HOXA2(Homeobox)/mES-Hoxa2-ChIP-Seq(Donaldson_et_al.)/Homer	GYCATCMATCAT	1	1	6602	0.0297	6094.3	0.0356	0.83427
HOXA9(Homeobox)/HSC-Hoxa9-ChIP-Seq(GSE33509)/Homer	GGCCATAAATCA	1	1	44888	0.2022	39906.1	0.233	0.867811
HOXB13(Homeobox)/ProstateTumor-HOXB13-ChIP-Seq(GSE56288)/Homer	TTTTATKRGG	1	1	69143	0.3114	58384.6	0.3409	0.913464
Hoxb4(Homeobox)/ES-Hoxb4-ChIP-Seq(GSE34014)/Homer	TGATTRATGGCY	1	1	13354	0.0602	11766.5	0.0687	0.876274
Hoxc9(Homeobox)/Ainv15-Hoxc9-ChIP-Seq(GSE21812)/Homer	GGCCATAAATCA	1	1	35103	0.1581	31692.4	0.185	0.854595
IRF1(IRF)/PBMC-IRF1-ChIP-Seq(GSE43036)/Homer	GAAAGTGAAAGT	1	1	8016	0.0361	7689.9	0.0449	0.804009
IRF2(IRF)/Erythroblas-IRF2-ChIP-Seq(GSE36985)/Homer	GAAASYGAAASY	1	1	5294	0.0238	5500.5	0.0321	0.741433
IRF4(IRF)/GM12878-IRF4-ChIP-Seq(GSE32465)/Homer	ACTGAAACCA	1	1	24354	0.1097	20015	0.1169	0.938409
ISRE(IRF)/ThioMac-LPS-Expression(GSE23622)/Homer	AGTTTCASTTTC	1	1	3163	0.0142	3431.4	0.02	0.71
Jun-AP1(bZIP)/K562-cJun-ChIP-Seq(GSE31477)/Homer	GATGASTCATCN	1	1	8765	0.0395	13039.1	0.0761	0.519054
c-Jun-CRE(bZIP)/K562-cJun-ChIP-Seq(GSE31477)/Homer	ATGACGTCATCY	1	1	13709	0.0618	12213.7	0.0713	0.86676
JunD(bZIP)/K562-JunD-ChIP-Seq/Homer	ATGACGTCATCN	1	1	3714	0.0167	3577.2	0.0209	0.799043
KLF10(Zf)/HEK293-KLF10.GFP-ChIP-Seq(GSE58341)/Homer	GGGGGTGTGTCC	1	1	31028	0.1398	26644.4	0.1556	0.898458
KLF14(Zf)/HEK293-KLF14.GFP-ChIP-Seq(GSE58341)/Homer	RGKGGGCGKGGC	1	1	53887	0.2427	47955.9	0.28	0.866786
Klf4(Zf)/mES-Klf4-ChIP-Seq(GSE11431)/Homer	GCCACACCCA	1	1	11128	0.0501	12608	0.0736	0.680707
KLF5(Zf)/LoVo-KLF5-ChIP-Seq(GSE49402)/Homer	DGGGYGKGGC	1	1	38697	0.1743	36370.1	0.2123	0.821008
Klf9(Zf)/GBM-Klf9-ChIP-Seq(GSE62211)/Homer	GCCACRCCCACY	1	1	10704	0.0482	11228.1	0.0656	0.734756
Nr5a2(NR)/Pancreas-LRH1-ChIP-Seq(GSE34295)/Homer	BTCAAGGTCA	1	1	32999	0.1486	31137.4	0.1818	0.817382
LXRE(NR),DR4/RAW-LXRb.biotin-ChIP-Seq(GSE21512)/Homer	RGGTTACTANAGGTCA	1	1	1997	0.009	2018.5	0.0118	0.762712
MafA(bZIP)/Islet-MafA-ChIP-Seq(GSE30298)/Homer	TGCTGACTCA	1	1	41969	0.189	33674.4	0.1966	0.961343
MafK(bZIP)/C2C12-MafK-ChIP-Seq(GSE36030)/Homer	GCTGASTCAGCA	1	1	10373	0.0467	10051.7	0.0587	0.795571
Max(bHLH)/K562-Max-ChIP-Seq(GSE31477)/Homer	RCCACGTGGYYN	1	1	33043	0.1488	26874	0.1569	0.948375
Maz(Zf)/HepG2-Maz-ChIP-Seq(GSE31477)/Homer	GGGGGGGG	1	1	43663	0.1967	35433	0.2069	0.950701
Mef2a(MADS)/HL1-Mef2a.biotin-ChIP-Seq(GSE21529)/Homer	CYAAAAATAG	1	1	25120	0.1132	22151.9	0.1293	0.875483
Mef2b(MADS)/HEK293-Mef2b.V5-ChIP-Seq(GSE67450)/Homer	GCTATTTTTGGM	1	1	51484	0.2319	42742.7	0.2495	0.929459
Mef2c(MADS)/GM12878-Mef2c-ChIP-Seq(GSE32465)/Homer	DCYAAAAATAGM	1	1	29468	0.1327	26331.7	0.1537	0.86337
Mef2d(MADS)/Retina-Mef2d-ChIP-Seq(GSE61391)/Homer	GCTATTTTTAGC	1	1	12214	0.055	12170	0.0711	0.773558
MITF(bHLH)/MastCells-MITF-ChIP-Seq(GSE48085)/Homer	RTCATGTGAC	1	1	43877	0.1976	36644.2	0.2139	0.923796
Myf5(bHLH)/GM-Myf5-ChIP-Seq(GSE24852)/Homer	BAACAGCTGT	1	1	33471	0.1508	28948.5	0.169	0.892308
MyoD(bHLH)/Myotube-MyoD-ChIP-Seq(GSE21614)/Homer	RRCAGCTGYTSY	1	1	34573	0.1557	29435.1	0.1719	0.905759
MyoG(bHLH)/C2C12-MyoG-ChIP-Seq(GSE36024)/Homer	AACAGCTG	1	1	47965	0.2161	40428.9	0.236	0.915678
NF1:FOXA1(CTF,Forkhead)/LNCAP-FOXA1-ChIP-Seq(GSE27824)/Homer	WNTGTTTRYTTTGGCA	1	1	3605	0.0162	3780.8	0.0221	0.733032
NF1(CTF)/LNCAP-NF1-ChIP-Seq(Unpublished)/Homer	CYTGGCABNSTGCCAR	1	1	20162	0.0908	18820.9	0.1099	0.826206
NF-E2(bZIP)/K562-NFE2-ChIP-Seq(GSE31477)/Homer	GATGACTCAGCA	1	1	2281	0.0103	3251.4	0.019	0.542105
n-Myc(bHLH)/mES-nMyc-ChIP-Seq(GSE11431)/Homer	VRCCACGTGG	1	1	30592	0.1378	25112	0.1466	0.939973
NPAS2(bHLH)/Liver-NPAS2-ChIP-Seq(GSE39860)/Homer	KCCACGTGAC	1	1	52971	0.2386	42579.7	0.2486	0.959775
Nr5a2(NR)/mES-Nr5a2-ChIP-Seq(GSE19019)/Homer	BTCAAGGTCA	1	1	24763	0.1115	23675.2	0.1382	0.806802
NRF1(NRF)/MCF7-NRF1-ChIP-Seq(Unpublished)/Homer	CTGCGCATGCGC	1	1	1153	0.0052	1170	0.0068	0.764706
Nrf2(bZIP)/Lymphoblast-Nrf2-ChIP-Seq(GSE37589)/Homer	HTGCTGAGTCAT	1	1	1902	0.0086	2683.5	0.0157	0.547771
Nur77(NR)/K562-NR4A1-ChIP-Seq(GSE31363)/Homer	TGACCTTTNCNT	1	1	10154	0.0457	10438.5	0.0609	0.750411
p53(p53)/Saos-p53-ChIP-Seq(GSE15780)/Homer	RRCATGYCYRGRCATGYYYN	1	1	5061	0.0228	4698	0.0274	0.832117
p53(p53)/Saos-p53-ChIP-Seq/Homer	RRCATGYCYRGRCATGYYYN	1	1	5061	0.0228	4698	0.0274	0.832117
p63(p53)/Keratinocyte-p63-ChIP-Seq(GSE17611)/Homer	NNDRCATGYCYNRRCATGYH	1	1	17244	0.0777	14906.6	0.087	0.893103
Pdx1(Homeobox)/Islet-Pdx1-ChIP-Seq(SRA008281)/Homer	YCATYAATCA	1	1	64319	0.2897	51718.4	0.3019	0.959589
PPARE(NR),DR1/3T3L1-Pparg-ChIP-Seq(GSE13511)/Homer	TGACCTTTGCCCCA	1	1	42551	0.1917	37229.6	0.2174	0.881785
Ptf1a(bHLH)/Panc1-Ptf1a-ChIP-Seq(GSE47459)/Homer	ACAGCTGTTN	1	1	114406	0.5153	92400.8	0.5395	0.955144
PU.1:IRF8(ETS:IRF)/pDC-Irf8-ChIP-Seq(GSE66899)/Homer	GGAAGTGAAAST	1	1	10704	0.0482	9769.8	0.057	0.845614
PU.1-IRF(ETS:IRF)/Bcell-PU.1-ChIP-Seq(GSE21512)/Homer	MGGAAGTGAAAC	1	1	74272	0.3345	59367.2	0.3466	0.965089
PU.1(ETS)/ThioMac-PU.1-ChIP-Seq(GSE21512)/Homer	AGAGGAAGTG	1	1	24336	0.1096	27083.6	0.1581	0.693232
RARg(NR)/ES-RARg-ChIP-Seq(GSE30538)/Homer	AGGTCAAGGTCA	1	1	2851	0.0128	3326.7	0.0194	0.659794
Reverb(NR),DR2/RAW-Reverba.biotin-ChIP-Seq(GSE45914)/Homer	GTRGGTCASTGGGTCA	1	1	5214	0.0235	4612	0.0269	0.873606
RORgt(NR)/EL4-RORgt.Flag-ChIP-Seq(GSE56019)/Homer	AAYTAGGTCA	1	1	6085	0.0274	5687.7	0.0332	0.825301
RUNX(Runt)/HPC7-Runx1-ChIP-Seq(GSE22178)/Homer	SAAACCACAG	1	1	36276	0.1634	32983.7	0.1926	0.84839
RUNX1(Runt)/Jurkat-RUNX1-ChIP-Seq(GSE29180)/Homer	AAACCACARM	1	1	54500	0.2455	46851.6	0.2735	0.897623
RUNX2(Runt)/PCa-RUNX2-ChIP-Seq(GSE33889)/Homer	NWAACCACADNN	1	1	45253	0.2038	39229.8	0.229	0.889956
RUNX-AML(Runt)/CD4+-PolII-ChIP-Seq(Barski_et_al.)/Homer	GCTGTGGTTW	1	1	38141	0.1718	33889.4	0.1979	0.868115
RXR(NR),DR1/3T3L1-RXR-ChIP-Seq(GSE13511)/Homer	TAGGGCAAAGGTCA	1	1	49039	0.2209	42450.3	0.2478	0.891445
Sp1(Zf)/Promoter/Homer	GGCCCCGCCCCC	1	1	3101	0.014	3223.8	0.0188	0.744681
SPDEF(ETS)/VCaP-SPDEF-ChIP-Seq(SRA014231)/Homer	ASWTCCTGBT	1	1	51311	0.2311	47669.4	0.2783	0.830399
SpiB(ETS)/OCILY3-SPIB-ChIP-Seq(GSE56857)/Homer	AAAGRGGAAGTG	1	1	12097	0.0545	13175.9	0.0769	0.708713
Stat3+il21(Stat)/CD4-Stat3-ChIP-Seq(GSE19198)/Homer	SVYTTCCNGGAARB	1	1	38334	0.1727	31168.2	0.182	0.948901
Stat3(Stat)/mES-Stat3-ChIP-Seq(GSE11431)/Homer	CTTCCGGGAA	1	1	25236	0.1137	21158.2	0.1235	0.920648
T1ISRE(IRF)/ThioMac-Ifnb-Expression/Homer	ACTTTCGTTTCT	1	1	615	0.0028	669.3	0.0039	0.717949
Tcf12(bHLH)/GM12878-Tcf12-ChIP-Seq(GSE32465)/Homer	VCAGCTGYTG	1	1	43138	0.1943	36568.6	0.2135	0.91007
Tcf21(bHLH)/ArterySmoothMuscle-Tcf21-ChIP-Seq(GSE61369)/Homer	NAACAGCTGG	1	1	46141	0.2078	39209.4	0.2289	0.90782
TEAD2(TEA)/Py2T-Tead2-ChIP-Seq(GSE55709)/Homer	CCWGGAATGY	1	1	28304	0.1275	24856	0.1451	0.878704
TEAD4(TEA)/Tropoblast-Tead4-ChIP-Seq(GSE37350)/Homer	CCWGGAATGY	1	1	45156	0.2034	37805.7	0.2207	0.921613
TEAD(TEA)/Fibroblast-PU.1-ChIP-Seq(Unpublished)/Homer	YCWGGAATGY	1	1	39498	0.1779	33166.3	0.1936	0.918905
Tlx?(NR)/NPC-H3K4me1-ChIP-Seq(GSE16256)/Homer	CTGGCAGSCTGCCA	1	1	23098	0.104	19321.3	0.1128	0.921986
TR4(NR),DR1/Hela-TR4-ChIP-Seq(GSE24685)/Homer	GAGGTCAAAGGTCA	1	1	4558	0.0205	5586	0.0326	0.628834
THRa(NR)/C17.2-THRa-ChIP-Seq(GSE38347)/Homer	GGTCANYTGAGGWCA	1	1	15893	0.0716	13884.8	0.0811	0.882861
USF1(bHLH)/GM12878-Usf1-ChIP-Seq(GSE32465)/Homer	SGTCACGTGR	1	1	18649	0.084	16805.8	0.0981	0.856269
Usf2(bHLH)/C2C12-Usf2-ChIP-Seq(GSE36030)/Homer	GTCACGTGGT	1	1	13856	0.0624	12812.7	0.0748	0.834225
VDR(NR),DR3/GM10855-VDR+vitD-ChIP-Seq(GSE22484)/Homer	ARAGGTCANWGAGTTCANNN	1	1	8384	0.0378	7323.3	0.0428	0.883178
ZBTB12(Zf)/HEK293-ZBTB12.GFP-ChIP-Seq(GSE58341)/Homer	NGNTCTAGAACCNGV	1	1	19545	0.088	16047.7	0.0937	0.939168
ZBTB18(Zf)/HEK293-ZBTB18.GFP-ChIP-Seq(GSE58341)/Homer	AACATCTGGA	1	1	24562	0.1106	22236.4	0.1298	0.85208
