# Supplementary material for: Dnmt3a knockout in excitatory neurons impairs postnatal synapse maturation and increases the repressive histone modification H3K27me3
Source: eLife. 2022 May 23;11:e66909. doi: 10.7554/eLife.66909 (PMC9170249; doi:10.7554/eLife.66909)
Supplement: Supplementary file 5. [file elife-66909-supp5.xlsx]

## Sheet: Readme
Supplementary File 5. List of transcription factors and chromatin regulators that bind at cis-regulatory regions of the differentially expressed genes in P39 Dnmt3a cKO
Sub-tables "TFs regulate up DE genes" and "TFs regulate down DE genes":
Predictions were performed using BART (Binding Analysis for Regulation of Transcription). The meaning of each reported value in the table are described as follows (adapted from the BART manual):
Wilcoxon test statistic & P-value (Columns 2 & 3): These two columns indicate the association prediction of each TF with respect to data for all other TFs. For each TF, we use Wilcoxon rank-sum test to compare the association scores from ChIP-seq datasets of that factor with the association scores from all datasets.
Z-score (Column 4): This column is used to assess the specificity of each factor compared with a background model. We build up background models using the Wilcoxon test statistics obtained from each annotated gene set from the Molecular Signatures Database (MSigDB).
Max AUC (Column 5): This column shows the maximum association score of that factor among multiple ChIP-seq datasets.
Relative Rank (Column 6): This column indicates the average rank of Wilcoxon P-value, Z-score and maxAUC for each factor divided by the total number of factors.
Irwin-Hall P-value (Column 7): This P-value indicates the integrative rank significance, using the Irwin-Hall distribution as the null distribution for unrelated ranks. We used 0.05 as the cutoff for significance threshold.
Functional TF rank score (Column 8): This is simply 1- relaitve rank. Used in the visualizations.

## Sheet: TFs regulate up DE genes
TF	Wilcoxon test statistic	Wilcoxon test p-value	z-score	max AUC	relative rank	Irwin-Hall_p-value	functional TF rank score
ISL1	7.969	7.98e-16	7.271	0.611	0.032	0.0001412	0.968
SMC1A	7.314	1.292e-13	7.598	0.588	0.04	0.0002819	0.96
ONECUT2	5.101	1.693e-07	8.32	0.593	0.04	0.0002945	0.96
RAD21	8.896	2.893e-19	6.198	0.596	0.041	0.0003209	0.959
STAG1	5.214	9.241e-08	8.003	0.584	0.045	0.0004093	0.955
MEF2C	2.411	0.007959	8.174	0.667	0.048	0.0004944	0.952
POU3F1	2.376	0.008762	7.252	0.682	0.049	0.0005314	0.951
FOSB	3.242	0.0005944	5.504	0.661	0.053	0.0006536	0.947
POU3F2	3.295	0.0004916	4.842	0.671	0.053	0.0006757	0.947
ASCL1	4.365	6.362e-06	4.388	0.667	0.054	0.0006982	0.946
NR3C1	6.966	1.636e-12	4.264	0.597	0.065	0.001226	0.935
LHX3	3.761	8.466e-05	7.429	0.57	0.067	0.001328	0.933
NPAS4	2.41	0.007987	4.798	0.672	0.068	0.0014	0.932
SOX3	3.401	0.0003355	4.45	0.63	0.068	0.001436	0.932
STAG2	2.422	0.007725	8.493	0.578	0.071	0.001588	0.929
MYOD1	6.645	1.52e-11	4.623	0.579	0.072	0.001668	0.928
OLIG2	3.903	4.753e-05	4.215	0.594	0.077	0.002016	0.923
EZH2	9.065	6.245e-20	2.937	0.69	0.078	0.002109	0.922
BMI1	3.171	0.0007592	4.124	0.626	0.078	0.002109	0.922
LHX2	2.71	0.003366	8.224	0.567	0.078	0.002157	0.922
OTX2	2.367	0.008967	4.735	0.647	0.081	0.002356	0.919
AR	4.639	1.751e-06	5.628	0.556	0.082	0.00246	0.918
SIX2	5.445	2.583e-08	5.243	0.555	0.084	0.002622	0.916
JARID2	4.436	4.58e-06	3.019	0.673	0.085	0.00279	0.915
PAX6	2.392	0.008383	4.552	0.625	0.085	0.00279	0.915
SUZ12	13.64	1.159e-42	2.492	0.692	0.09	0.003275	0.91
CTCF	13.217	3.517e-40	6.682	0.532	0.09	0.003275	0.91
PAX7	3.213	0.0006568	6.172	0.551	0.094	0.003742	0.906
PTF1A	3.619	0.000148	3.978	0.578	0.095	0.003812	0.905
SMC3	4.331	7.408e-06	6.078	0.541	0.095	0.003883	0.905
CDX2	2.438	0.007377	8.516	0.547	0.095	0.003883	0.905
EOMES	1.643	0.05016	6.201	0.6	0.096	0.003955	0.904
DMC1	7.241	2.222e-13	15.287	0.516	0.096	0.004028	0.904
NKX2-1	1.991	0.02325	6.82	0.573	0.096	0.004028	0.904
RXRA	3.114	0.0009217	3.877	0.579	0.1	0.004562	0.9
STAT5A	4.717	1.194e-06	4.874	0.542	0.102	0.004723	0.898
RFX2	2.279	0.01132	4.194	0.594	0.102	0.004723	0.898
MYOG	3.29	0.0005004	4.013	0.571	0.103	0.004888	0.897
PDX1	1.591	0.05585	10.903	0.574	0.103	0.004888	0.897
PITX1	2.677	0.003715	4.711	0.567	0.104	0.005057	0.896
FOSL2	3.752	8.758e-05	3.096	0.597	0.106	0.005405	0.894
SOX2	4.921	4.298e-07	2.761	0.618	0.107	0.005495	0.893
POU3F3	1.726	0.04222	3.792	0.676	0.107	0.005495	0.893
MEF2A	1.543	0.0614	4.789	0.658	0.108	0.005677	0.892
CBX7	3.294	0.0004943	2.694	0.664	0.11	0.005958	0.89
RNF2	7.253	2.037e-13	1.824	0.693	0.112	0.006346	0.888
ONECUT1	2.984	0.001421	6.372	0.532	0.114	0.006751	0.886
PCGF6	2.918	0.001761	2.793	0.655	0.115	0.006855	0.885
FOXO3	1.679	0.0466	3.858	0.635	0.117	0.007173	0.883
TCF7L1	2.396	0.008282	3.137	0.623	0.117	0.007281	0.883
NEUROG2	2.053	0.02002	3.819	0.586	0.118	0.00739	0.882
CREBBP	2.782	0.002701	2.883	0.62	0.119	0.007501	0.881
HOXA13	1.595	0.05539	5.697	0.575	0.119	0.007501	0.881
ATRX	2.255	0.01207	3.143	0.627	0.12	0.007725	0.88
FOXG1	1.586	0.05632	6.095	0.573	0.121	0.007953	0.879
PPARG	7.947	9.556e-16	3.831	0.535	0.121	0.008069	0.879
PCGF2	2.373	0.00882	2.894	0.649	0.123	0.008304	0.877
FOXA1	3.919	4.44e-05	3.737	0.546	0.124	0.008543	0.876
SMARCA4	2.586	0.004852	2.886	0.596	0.127	0.009162	0.873
BAZ1B	2.566	0.005145	11.986	0.513	0.127	0.009162	0.873
MTF2	2.876	0.002013	2.301	0.667	0.127	0.009289	0.873
NFIB	3.909	4.63e-05	4.583	0.527	0.128	0.009547	0.872
FOXL2	2.031	0.02112	5.239	0.543	0.133	0.01049	0.867
HOXC9	1.374	0.08471	5.362	0.582	0.134	0.01077	0.866
H3F3B	2.124	0.01683	21.671	0.513	0.136	0.0112	0.864
REST	2.344	0.009537	8.84	0.513	0.137	0.01149	0.863
CBX6	1.695	0.045	2.881	0.653	0.144	0.01351	0.856
NACC1	1.539	0.06189	4.95	0.557	0.146	0.01401	0.854
HOXD13	1.533	0.06269	5.228	0.555	0.146	0.01401	0.854
EED	1.644	0.05004	3.065	0.601	0.148	0.01469	0.852
SMARCC2	1.561	0.05924	5.544	0.545	0.15	0.01522	0.85
GTF3C1	1.743	0.04069	4.018	0.552	0.15	0.01522	0.85
NFATC1	1.796	0.03624	3.733	0.553	0.152	0.01594	0.848
TEAD2	1.759	0.03928	5.68	0.527	0.153	0.01613	0.847
THRA	1.566	0.05871	3.867	0.565	0.155	0.01688	0.845
ESR1	4.13	1.814e-05	2.83	0.541	0.156	0.01707	0.844
PBX1	2.78	0.002721	3.849	0.524	0.157	0.01726	0.843
PHF19	2.034	0.02097	2.389	0.604	0.157	0.01726	0.843
FOXP1	1.601	0.05466	3.315	0.578	0.157	0.01745	0.843
HSF1	1.746	0.04042	7.271	0.513	0.158	0.01765	0.842
SOX9	2.017	0.02185	1.707	0.674	0.158	0.01785	0.842
HIRA	1.479	0.06961	5.592	0.543	0.158	0.01785	0.842
DMRT1	1.565	0.0588	8.434	0.517	0.16	0.01844	0.84
AEBP2	1.773	0.03808	2.635	0.59	0.161	0.01865	0.839
SHOX2	1.779	0.03765	2.991	0.571	0.161	0.01885	0.839
FOXA2	2.424	0.007671	3.67	0.529	0.162	0.01906	0.838
NEUROD2	3.127	0.0008832	3.263	0.531	0.162	0.01926	0.838
SMARCC1	1.574	0.05774	3.587	0.569	0.163	0.01947	0.837
FOS	2.305	0.01059	1.618	0.655	0.164	0.01989	0.836
NCOR1	1.808	0.03533	4.518	0.527	0.165	0.02032	0.835
EBF2	2.415	0.007865	3.168	0.537	0.167	0.02098	0.833
RYBP	3.172	0.0007564	1.694	0.573	0.171	0.02232	0.829
MEIS1	1.43	0.07632	3.241	0.58	0.171	0.02255	0.829
MSX1	1.548	0.06082	3.47	0.56	0.173	0.02325	0.827
TEAD4	2.172	0.01493	2.395	0.571	0.175	0.02397	0.825
RXRG	4.044	2.631e-05	2.303	0.54	0.175	0.02421	0.825
POU5F1	2.643	0.004107	2.012	0.557	0.181	0.02671	0.819
YAP1	1.497	0.06719	3.68	0.547	0.182	0.02697	0.818
SP7	2.18	0.01463	2.088	0.56	0.189	0.03021	0.811
HDAC3	2.183	0.01451	2.141	0.555	0.189	0.0305	0.811
CEBPB	3.759	8.519e-05	2.081	0.532	0.19	0.03106	0.81
TEAD1	1.659	0.04856	2.471	0.57	0.19	0.03106	0.81
RARB	1.331	0.09155	5.007	0.521	0.193	0.03222	0.807
C17orf96	1.85	0.03219	0.954	0.659	0.194	0.03311	0.806
CRTC2	2.352	0.009337	2.489	0.538	0.194	0.03311	0.806
GMNN	1.774	0.03801	6.086	0.488	0.196	0.03371	0.804
TLX1	2.013	0.02207	2.545	0.539	0.199	0.03555	0.801
CRX	1.235	0.1084	4.679	0.521	0.202	0.03682	0.798
DLX5	1.75	0.04003	3.323	0.517	0.203	0.03746	0.797
MAFG	1.263	0.1033	9.908	0.496	0.203	0.03779	0.797
RFX6	1.425	0.07702	3.627	0.533	0.204	0.03811	0.796
ZC3H11A	1.293	0.098	6.342	0.5	0.209	0.0408	0.791
NKX3-2	1.458	0.07239	5.171	0.501	0.209	0.0408	0.791
CTNNB1	1.196	0.1158	3.174	0.547	0.21	0.04183	0.79
TET1	2.205	0.01374	1.833	0.541	0.211	0.04253	0.789
PPARA	2.048	0.02029	3.204	0.504	0.211	0.04253	0.789
TOP2B	0.947	0.1719	2.725	0.585	0.213	0.0436	0.787
HNF1B	1.557	0.05976	3.539	0.514	0.215	0.04468	0.785
SMARCB1	1.646	0.0499	1.089	0.593	0.216	0.04542	0.784
ELF5	1.867	0.03094	3.902	0.488	0.216	0.04542	0.784
PAX3	1.092	0.1375	6.776	0.5	0.216	0.04542	0.784
ZIC1	1.371	0.08523	6.433	0.491	0.217	0.04616	0.783
DDIT3	1.392	0.08192	3.336	0.529	0.217	0.04616	0.783
LDB1	0.813	0.208	3.032	0.577	0.218	0.04691	0.782
RUNX2	3.723	9.836e-05	2.088	0.503	0.221	0.04881	0.779
BHLHA15	1.515	0.06487	3.446	0.512	0.223	0.04998	0.777
H1F0	1.006	0.1573	9.19	0.493	0.225	0.05117	0.775
HOXD11	1.195	0.1161	4.155	0.508	0.227	0.05237	0.773
GATA6	1.48	0.06939	3.884	0.5	0.228	0.0536	0.772
INSM1	1.093	0.1373	5.121	0.5	0.229	0.05401	0.771
TCF4	1.038	0.1496	1.616	0.603	0.232	0.0561	0.768
MBD1	1.015	0.1551	3.741	0.525	0.232	0.0561	0.768
NANOG	1.778	0.03767	2.417	0.515	0.234	0.05738	0.766
WT1	1.958	0.02513	1.289	0.547	0.234	0.05738	0.766
CUX2	1.069	0.1425	4.744	0.499	0.238	0.06045	0.762
MEF2D	1.62	0.05258	2.505	0.514	0.239	0.0618	0.761
PRDM9	0.896	0.1851	4.567	0.505	0.244	0.06548	0.756
FOXF1	1.5	0.06686	2.825	0.51	0.246	0.0669	0.754
TCF12	1.594	0.05543	2.484	0.51	0.249	0.06981	0.751
NR6A1	1.514	0.06503	2.746	0.508	0.25	0.0703	0.75
HNF4A	2.646	0.004072	2.161	0.489	0.25	0.0703	0.75
NKX2-5	1.208	0.1135	3.297	0.502	0.254	0.0738	0.746
PROX1	1.486	0.06867	3.731	0.484	0.255	0.07483	0.745
ELK1	0.874	0.191	6.169	0.483	0.257	0.07638	0.743
SMARCA5	1.002	0.1582	4.321	0.493	0.26	0.07901	0.74
NEUROD1	1.411	0.07909	3.54	0.486	0.261	0.08008	0.739
ESR2	1.605	0.05425	2.81	0.492	0.262	0.08062	0.738
GATA4	1.745	0.04048	1.271	0.528	0.262	0.08116	0.738
JUND	1.194	0.1162	1.138	0.57	0.262	0.08116	0.738
HSF2	0.752	0.2261	10.05	0.475	0.263	0.08225	0.737
NR5A1	1.036	0.1501	3.672	0.496	0.266	0.08446	0.734
NKX3-1	1.138	0.1276	4.123	0.48	0.267	0.08558	0.733
SRF	1.712	0.04347	1.271	0.52	0.27	0.08899	0.73
NKX2-2	1.24	0.1075	2.977	0.496	0.271	0.08957	0.729
TBX3	1.063	0.1439	1.898	0.534	0.272	0.09073	0.728
MYF5	0.84	0.2006	2.415	0.535	0.274	0.0925	0.726
HAND2	1.179	0.1192	2.604	0.506	0.274	0.0925	0.726
TAL1	1.39	0.08227	1.624	0.522	0.276	0.09488	0.724
RAD51	1.121	0.1311	3.424	0.486	0.277	0.09609	0.723
MECP2	1.124	0.1305	2.872	0.5	0.278	0.0967	0.722
TLE	0.754	0.2256	5.914	0.475	0.279	0.09792	0.721
UTF1	1.458	0.07237	2.015	0.505	0.279	0.09792	0.721
PR	1.498	0.06713	2.545	0.492	0.28	0.09854	0.72
JUN	1.31	0.09516	1.095	0.541	0.282	0.1004	0.718
HRAS	1.392	0.08198	0.503	0.551	0.283	0.1023	0.717
BIRA	0.32	0.3746	2.462	0.553	0.287	0.1068	0.713
NR4A1	0.756	0.2249	3.638	0.495	0.288	0.1074	0.712
ESRRB	0.873	0.1913	2.97	0.501	0.289	0.1081	0.711
CEBPG	1.113	0.1328	2.46	0.502	0.289	0.1087	0.711
VDR	1.687	0.04583	0.619	0.517	0.291	0.1114	0.709
KDM6B	0.964	0.1676	0.407	0.577	0.292	0.1121	0.708
LMO2	0.859	0.1953	1.656	0.534	0.292	0.1121	0.708
EBF1	1.02	0.1539	1.514	0.529	0.297	0.1182	0.703
ATF2	1.315	0.09425	2.091	0.495	0.298	0.1189	0.702
NUP153	0.832	0.2028	3.433	0.48	0.305	0.1283	0.695
BCL6	0.803	0.2109	3.355	0.482	0.307	0.1297	0.693
PHIP	1.432	0.0761	1.643	0.494	0.307	0.1297	0.693
TFAP2A	1.225	0.1104	1.018	0.518	0.308	0.1312	0.692
JUNB	0.203	0.4194	0.61	0.663	0.308	0.1312	0.692
NKX6-1	0.775	0.2192	3.608	0.476	0.309	0.1327	0.691
TP63	0.858	0.1955	3.14	0.482	0.31	0.1335	0.69
RAP1A	0.731	0.2324	3.854	0.474	0.311	0.135	0.689
ZIC2	1.321	0.09327	2.071	0.485	0.312	0.1373	0.688
PPARGC1A	1.048	0.1473	2.633	0.481	0.314	0.1388	0.686
NPAS3	1.112	0.1331	1.528	0.502	0.317	0.1436	0.683
KMT2B	0.911	0.1812	-0.304	0.563	0.324	0.1533	0.676
CBX2	1.042	0.1487	1.628	0.497	0.324	0.1533	0.676
ZACN	1.109	0.1338	2.042	0.485	0.325	0.1541	0.675
NFIA	1.149	0.1253	1.654	0.486	0.329	0.1609	0.671
ESRRA	0.835	0.2018	2.969	0.469	0.335	0.1687	0.665
CEBPA	0.475	0.3174	1.249	0.532	0.335	0.1696	0.665
CHRM2	0.671	0.2512	0.992	0.526	0.336	0.1713	0.664
ATF7	0.945	0.1722	1.756	0.489	0.338	0.1731	0.662
KLF15	0.265	0.3955	-0.084	0.586	0.338	0.1731	0.662
MAFA	0.615	0.2693	3.431	0.466	0.338	0.1731	0.662
TAF9B	1.009	0.1564	1.528	0.494	0.339	0.1749	0.661
TBX19	0.371	0.3552	1.926	0.508	0.341	0.1786	0.659
NR1H2	1.027	0.1523	2.319	0.472	0.342	0.1795	0.658
JMJD6	0.646	0.259	3.112	0.468	0.343	0.1823	0.657
PHOX2A	0.823	0.2053	2.166	0.48	0.346	0.186	0.654
FOXA3	0.646	0.2592	3.081	0.468	0.346	0.186	0.654
ETV5	0.931	0.176	1.56	0.488	0.349	0.1917	0.651
NFIL3	0.603	0.2732	2.949	0.465	0.355	0.2004	0.645
GRHL2	0.663	0.2537	2.548	0.469	0.356	0.2034	0.644
RPA	1.028	0.1519	1.775	0.468	0.36	0.2093	0.64
POLR3D	0.372	0.3548	2.296	0.485	0.364	0.2164	0.636
KLF5	0.495	0.3102	1.087	0.505	0.364	0.2164	0.636
EP300	-0.097	0.5388	0.194	0.574	0.366	0.2195	0.634
KDM4A	0.956	0.1696	-0.128	0.507	0.37	0.2268	0.63
CBX8	-0.089	0.5354	0.762	0.545	0.373	0.2331	0.627
TFE3	0.467	0.3204	2.695	0.457	0.382	0.2493	0.618
NR1D2	0.477	0.3167	1.693	0.474	0.385	0.2559	0.615
CBX5	0.229	0.4094	3.872	0.436	0.388	0.2603	0.612
PRDM14	0.472	0.3185	2.5	0.455	0.388	0.2603	0.612
MED1	-0.269	0.6059	-0.58	0.583	0.388	0.2614	0.612
NR5A2	0.357	0.3607	1.805	0.475	0.388	0.2614	0.612
ATF4	0.32	0.3744	0.183	0.519	0.389	0.2625	0.611
H2AZ	1.06	0.1445	-3.4	0.539	0.397	0.2784	0.603
DPPA2	0.522	0.3008	1.825	0.459	0.398	0.2796	0.602
AHR	0.931	0.176	1.428	0.457	0.398	0.2807	0.602
SMAD2-SMAD3	0.343	0.3657	0.215	0.505	0.402	0.2877	0.598
MBD3	0.241	0.4049	0.909	0.496	0.403	0.29	0.597
DNMT3A	0.326	0.3721	2.026	0.463	0.405	0.2935	0.595
LEO1	0.58	0.2811	1.475	0.464	0.408	0.3005	0.592
ZNF384	0.336	0.3685	2.838	0.44	0.409	0.3017	0.591
RCOR2	0.584	0.2797	1.295	0.464	0.41	0.3041	0.59
TDG	0.581	0.2807	1.372	0.464	0.41	0.3041	0.59
TEC	0.649	0.2583	1.489	0.456	0.412	0.3077	0.588
ZBTB17	0.247	0.4026	-1.077	0.533	0.415	0.3136	0.585
KDM2B	0.924	0.1778	-0.617	0.486	0.415	0.3148	0.585
PHC1	0.51	0.305	1.739	0.447	0.416	0.3172	0.584
ATOH1	0.227	0.4103	1.063	0.478	0.422	0.3294	0.578
HNF4G	0.649	0.2581	1.478	0.448	0.423	0.3306	0.577
ASH2L	-0.011	0.5044	0.672	0.497	0.425	0.3342	0.575
CRY1	0.507	0.306	1.511	0.447	0.429	0.3441	0.571
PRDM13	0.763	0.2229	-0.053	0.469	0.43	0.3453	0.57
DICER1	0.865	0.1936	-0.252	0.468	0.432	0.349	0.568
MAFK	0.236	0.4068	1.571	0.459	0.432	0.3503	0.568
RBPJL	0.659	0.2549	0.444	0.461	0.433	0.3515	0.567
H2AFX	0.543	0.2937	-0.262	0.476	0.436	0.359	0.564
ZFAT	0.402	0.3438	1.596	0.443	0.439	0.364	0.561
FEZF2	0.835	0.202	-0.506	0.471	0.44	0.3678	0.56
RBPJ	-0.106	0.5421	-2.073	0.551	0.44	0.3678	0.56
MAFF	0.42	0.3371	1.262	0.452	0.442	0.3703	0.558
NFE2L2	-0.452	0.6744	-1.161	0.552	0.443	0.3728	0.557
KLF4	-0.389	0.6514	-0.975	0.541	0.444	0.3754	0.556
CRY2	0.463	0.3217	1.472	0.442	0.444	0.3754	0.556
SALL4	0.215	0.4147	1.478	0.454	0.444	0.3766	0.556
FOXD3	-0.313	0.6229	-0.337	0.515	0.446	0.3791	0.554
ETV4	0.458	0.3236	0.802	0.454	0.447	0.3817	0.553
KDM5C	0.764	0.2224	-0.636	0.472	0.447	0.3817	0.553
PRDM16	0.458	0.3233	-0.474	0.477	0.447	0.383	0.553
TOP2A	0.538	0.2952	-0.061	0.466	0.447	0.383	0.553
H4K8BU	0.442	0.3294	0.766	0.453	0.449	0.3868	0.551
MBD2	0.166	0.4342	2.01	0.439	0.45	0.388	0.55
PER2	0.391	0.3477	1.177	0.446	0.45	0.3893	0.55
PER1	0.315	0.3764	1.486	0.444	0.45	0.3893	0.55
SIX4	0.422	0.3365	0.861	0.452	0.45	0.3893	0.55
SMAD1-SMAD5	0.178	0.4294	1.62	0.441	0.458	0.406	0.542
PRDM5	0.384	0.3506	0.556	0.449	0.464	0.4202	0.536
DAXX	0.034	0.4865	0.819	0.463	0.466	0.4228	0.534
USF1	0.386	0.3498	0.85	0.44	0.467	0.4253	0.533
GATA2	-1.204	0.8857	0.22	0.534	0.47	0.4331	0.53
MZF1	0.229	0.4096	1.537	0.429	0.47	0.4331	0.53
ZFPM1	0.218	0.4135	1.461	0.435	0.47	0.4331	0.53
ELK3	0.098	0.4608	0.893	0.453	0.473	0.4383	0.527
GLI1	0.299	0.3825	0.823	0.443	0.474	0.4409	0.526
SMAD2	0.101	0.4597	0.833	0.453	0.474	0.4409	0.526
NFE2	0.11	0.4561	0.323	0.46	0.477	0.4488	0.523
ETV2	0.352	0.3626	0.389	0.446	0.477	0.4488	0.523
TFCP2	0.185	0.4267	1.417	0.432	0.478	0.4501	0.522
TFAP2C	0.18	0.4288	0.625	0.45	0.478	0.4514	0.522
STAT5B	-0.984	0.8375	0.417	0.503	0.484	0.4632	0.516
THRB	0.285	0.3878	0.674	0.433	0.485	0.4671	0.515
NR1D1	0.041	0.4837	0.08	0.461	0.486	0.4684	0.514
CTCFL	0.258	0.3982	0.587	0.439	0.486	0.4684	0.514
PBX3	0.36	0.3595	-0.185	0.447	0.488	0.4723	0.512
ERF	-0.002	0.501	-0.784	0.479	0.488	0.4737	0.512
PRDM15	0.086	0.4657	-0.142	0.461	0.489	0.475	0.511
NIPBL	-0.286	0.6127	-2.863	0.517	0.491	0.4802	0.509
HEXIM1	0.244	0.4034	0.409	0.437	0.494	0.4868	0.506
NRF1	-0.611	0.7293	-1.555	0.508	0.507	0.5157	0.493
NCOR2	-0.114	0.5453	0.414	0.445	0.508	0.5183	0.492
GATA1	-0.674	0.75	0.238	0.474	0.51	0.5223	0.49
KMT2D	-1.234	0.8914	-2.811	0.564	0.512	0.5262	0.488
TRIM28	-1.71	0.9564	2.489	0.474	0.514	0.5314	0.486
SOX17	-0.098	0.5391	1.021	0.425	0.514	0.5314	0.486
ATF3	-0.36	0.6406	-0.495	0.469	0.515	0.5341	0.485
SOX10	0.428	0.3344	-1.801	0.447	0.524	0.5537	0.476
SIRT1	0.073	0.4708	-1.794	0.468	0.524	0.5537	0.476
SRC	0.055	0.4779	0.076	0.431	0.525	0.5563	0.475
BHLHE40	-0.051	0.5205	0.508	0.42	0.528	0.5628	0.472
TBX5	0.181	0.4284	-0.401	0.432	0.528	0.5628	0.472
RORA	-0.29	0.6142	0.029	0.444	0.529	0.5641	0.471
KDM4C	-0.089	0.5354	-0.937	0.453	0.53	0.568	0.47
NR0B1	-0.201	0.5796	1.305	0.407	0.532	0.5706	0.468
DDX21	0.13	0.4482	-0.272	0.427	0.533	0.5732	0.467
PKNOX1	-0.401	0.6557	-2.905	0.491	0.536	0.581	0.464
NP23	-0.115	0.5457	0.917	0.408	0.537	0.5836	0.463
RBFOX2	0.115	0.4541	-0.395	0.426	0.539	0.5874	0.461
RFX3	0.203	0.4196	-0.98	0.433	0.541	0.5913	0.459
EHMT2	-0.257	0.6016	1.499	0.397	0.541	0.5913	0.459
SMAD1	-0.488	0.6871	-3.435	0.499	0.543	0.5964	0.457
EGR2	-0.41	0.659	-3.423	0.493	0.544	0.5977	0.456
SMCHD1	0.07	0.4719	-0.336	0.422	0.544	0.599	0.456
RCOR1	-0.152	0.5605	0.42	0.413	0.546	0.6029	0.454
HOXB4	-0.395	0.6537	-1.169	0.459	0.551	0.6131	0.449
TRIM33	-0.555	0.7106	0.637	0.426	0.551	0.6143	0.449
SPI1	-4.847	1	-0.556	0.562	0.553	0.6169	0.447
FAIRE	-0.855	0.8037	-0.867	0.475	0.553	0.6169	0.447
PRDM4	-0.226	0.5894	0.885	0.4	0.553	0.6169	0.447
LYL1	-0.531	0.7024	0.253	0.431	0.554	0.6207	0.446
LHX6	0.095	0.4623	-0.96	0.424	0.56	0.6321	0.44
MED12	-2.053	0.9799	-3.816	0.582	0.561	0.6346	0.439
KDM5A	-0.037	0.5147	-3.142	0.459	0.561	0.6346	0.439
MAFB	-0.413	0.6602	-0.42	0.432	0.563	0.6396	0.437
BTAF1	-0.339	0.6325	-0.988	0.438	0.568	0.6508	0.432
ETV6	-1.088	0.8618	-7.076	0.544	0.569	0.652	0.431
SF1	0.139	0.4447	-1.885	0.428	0.57	0.6545	0.43
SALL1	-0.384	0.6494	0.961	0.387	0.572	0.6582	0.428
ELL3	-0.227	0.5897	0.156	0.4	0.575	0.6644	0.425
WIZ	-0.189	0.5749	-0.481	0.41	0.575	0.6656	0.425
SREBF1	-1.114	0.8673	-1.256	0.475	0.576	0.6668	0.424
DLX3	0.003	0.4988	-1.419	0.417	0.579	0.6729	0.421
EHF	-0.096	0.5382	-0.761	0.409	0.58	0.6754	0.42
RARA	-0.692	0.7554	-0.111	0.426	0.581	0.6778	0.419
TGIF2	-0.143	0.557	-0.495	0.405	0.582	0.679	0.418
HDAC1	-0.979	0.8362	-6.956	0.519	0.584	0.6838	0.416
ZFP57	-1.306	0.9043	-0.872	0.474	0.584	0.6838	0.416
KDM4B	-0.204	0.5807	-0.436	0.401	0.587	0.6898	0.413
HEY1	-0.485	0.686	-0.84	0.427	0.588	0.691	0.412
KDM1A	-1.599	0.9451	-6.841	0.561	0.589	0.6946	0.411
SS18	-1.459	0.9277	0.456	0.45	0.59	0.6958	0.41
SMAD4	-0.296	0.6166	-3.763	0.453	0.594	0.704	0.406
CHD4	-1.394	0.9183	-1.351	0.476	0.595	0.7052	0.405
H4K5BU	-0.002	0.5009	-2.375	0.416	0.596	0.7087	0.404
RAD23B	-0.562	0.7128	-1.41	0.433	0.597	0.7099	0.403
METTL3	-0.872	0.8084	-1.062	0.444	0.599	0.7145	0.401
MAF	-0.678	0.7511	-0.32	0.413	0.6	0.7157	0.4
SMAD3	-2.292	0.9891	-4.506	0.551	0.602	0.7203	0.398
RFX1	-0.044	0.5177	-2.586	0.414	0.604	0.7237	0.396
ZFP281	-1.229	0.8904	-1.734	0.466	0.606	0.7272	0.394
AIRE	-0.52	0.6985	-2.956	0.443	0.607	0.7306	0.393
NELFB	-0.064	0.5255	-2.69	0.412	0.609	0.734	0.391
NCAPH2	-0.255	0.6006	-1.728	0.407	0.612	0.7396	0.388
NFATC2	-0.442	0.6708	-0.222	0.383	0.613	0.7418	0.387
PHF5A	-0.349	0.6365	-0.81	0.39	0.615	0.7451	0.385
MXI1	-0.431	0.6666	-4.032	0.444	0.617	0.7495	0.383
STAT3	-4.773	1	-5.556	0.581	0.618	0.7506	0.382
IRF2	-0.465	0.6791	-1.447	0.411	0.619	0.7517	0.381
HOXB5	-0.235	0.5929	-1.51	0.399	0.619	0.7528	0.381
RUNX1	-2.477	0.9934	-3.662	0.531	0.62	0.755	0.38
BATF	-1.379	0.916	-0.086	0.429	0.621	0.7571	0.379
SMARCAD1	-0.562	0.7129	0.205	0.374	0.627	0.7678	0.373
DGCR8	-1.059	0.8552	-1.665	0.439	0.628	0.7689	0.372
STAT5	-1.728	0.958	-5.04	0.509	0.631	0.7742	0.369
TMPRSS4	-0.778	0.7818	-1.42	0.416	0.632	0.7762	0.368
INO80	-0.838	0.799	-1.456	0.419	0.633	0.7773	0.367
CHD7	-0.895	0.8147	-0.622	0.407	0.633	0.7783	0.367
HLF	-0.615	0.7307	0.191	0.37	0.637	0.7855	0.363
BATF3	-0.737	0.7693	-0.129	0.379	0.638	0.7865	0.362
ASCL2	-0.424	0.6642	-1.306	0.384	0.638	0.7875	0.362
ARNTL	-1.636	0.949	-2.994	0.475	0.641	0.7916	0.359
ZKSCAN1	-0.449	0.6733	-1.937	0.4	0.641	0.7916	0.359
TAF7L	-0.532	0.7026	-4.636	0.434	0.642	0.7935	0.358
SRSF2	-0.376	0.6467	-1.802	0.388	0.642	0.7935	0.358
MAX	-0.387	0.6507	-3.148	0.408	0.642	0.7945	0.358
FGFR1	-0.776	0.7812	-1.6	0.408	0.644	0.7965	0.356
ARID3A	-0.977	0.8357	-0.716	0.403	0.644	0.7965	0.356
SUMO2	-0.894	0.8143	-0.208	0.379	0.65	0.8072	0.35
TAF1	-0.881	0.811	-4.731	0.448	0.65	0.8072	0.35
SP1	-0.845	0.8011	-6.613	0.459	0.654	0.8139	0.346
NCOA2	-0.608	0.7283	-3.111	0.412	0.655	0.8158	0.345
HMGA2	-0.326	0.6276	-3.223	0.392	0.656	0.8176	0.344
ZMYND8	-0.441	0.6704	-2.295	0.383	0.657	0.8185	0.343
IRF8	-1.971	0.9756	-0.058	0.42	0.661	0.824	0.339
USF2	-0.602	0.7265	-2.801	0.399	0.664	0.8285	0.336
RORC	-1.088	0.8618	-3.233	0.432	0.664	0.8294	0.336
ATF7IP	-0.652	0.7427	-0.732	0.367	0.666	0.8321	0.334
MTA2	-0.377	0.6469	-3.347	0.388	0.667	0.8338	0.333
IKZF3	-0.228	0.5901	-4.834	0.4	0.668	0.8347	0.332
AFF3	-0.683	0.7527	-0.689	0.364	0.669	0.8365	0.331
KLF3	-0.832	0.7973	-4.759	0.431	0.669	0.8365	0.331
GRHL3	-0.883	0.8113	-2.678	0.407	0.671	0.839	0.329
CBX3	-0.358	0.6397	-3.88	0.389	0.671	0.8399	0.329
MAZ	-0.565	0.7138	-3.074	0.393	0.672	0.8407	0.328
ZIC1-ZIC2	-1.131	0.8709	-1.783	0.406	0.674	0.8441	0.326
GFI1	-1.443	0.9255	-7.427	0.478	0.675	0.8458	0.325
ERCC3	-0.599	0.7254	-1.46	0.371	0.675	0.8458	0.325
EGR1	-0.8	0.7882	-5.05	0.422	0.68	0.8532	0.32
ERG	-1.714	0.9567	-3.67	0.459	0.682	0.8548	0.318
XBP1	-1.232	0.8911	-3.243	0.426	0.683	0.8564	0.317
CAPG	-0.89	0.8132	-4.55	0.416	0.686	0.8603	0.314
MYC	-2.717	0.9967	-8.17	0.513	0.686	0.8611	0.314
TET2	-1.504	0.9337	-4.487	0.452	0.686	0.8611	0.314
TCF3	-2.339	0.9903	-2.887	0.46	0.687	0.8618	0.313
KCR	-0.94	0.8263	-5.051	0.424	0.689	0.8641	0.311
TRIM63	-0.769	0.779	-2.3	0.378	0.689	0.8649	0.311
NR1H3	-1.272	0.8983	-1.097	0.389	0.69	0.8657	0.31
NOTCH1	-1.902	0.9714	-8.272	0.491	0.69	0.8657	0.31
KAT8	-1.176	0.8802	-3.703	0.419	0.692	0.8687	0.308
FAM60A	-0.468	0.6802	-3.963	0.381	0.693	0.8694	0.307
KAT2B	-2.007	0.9776	-12.611	0.501	0.7	0.8789	0.3
SATB1	-2.621	0.9956	-4.128	0.472	0.701	0.8796	0.299
KDM2A	-0.848	0.8018	-2.315	0.374	0.701	0.8796	0.299
MTOR	-0.772	0.7799	-1.716	0.356	0.703	0.8817	0.297
STAT6	-2.18	0.9854	-0.622	0.408	0.704	0.8831	0.296
CHD2	-0.831	0.7971	-3.492	0.383	0.704	0.8831	0.296
MCRS1	-0.85	0.8025	-2.618	0.374	0.706	0.8858	0.294
GRIP1	-1.182	0.8814	-0.713	0.362	0.706	0.8858	0.294
CEBPD	-1.476	0.93	-0.707	0.379	0.706	0.8858	0.294
DPY30	-0.554	0.7102	-4.116	0.374	0.707	0.8872	0.293
POLR2A	-27.308	1	-20.931	0.549	0.709	0.8892	0.291
SAP130	-0.482	0.685	-5.168	0.38	0.71	0.8898	0.29
STAT4	-2.346	0.9905	-6.179	0.472	0.714	0.8951	0.286
HDAC2	-1.565	0.9412	-3.043	0.412	0.715	0.8964	0.285
HOXA9	-1.352	0.9118	-1.044	0.372	0.716	0.897	0.284
DMRTB1	-0.556	0.7108	-4.675	0.374	0.716	0.897	0.284
CDK8	-1.002	0.8417	-2.05	0.366	0.717	0.8976	0.283
ELOB	-0.522	0.699	-5.172	0.377	0.718	0.8995	0.282
MSL2	-0.992	0.8395	-2.56	0.367	0.718	0.8995	0.282
PRDM1	-0.761	0.7768	-6.332	0.397	0.719	0.9001	0.281
DNMT3B	-1.573	0.9422	-5.512	0.438	0.72	0.9008	0.28
PAX5	-2.769	0.9972	-2.191	0.433	0.722	0.9032	0.278
IRF4	-4.101	1	-1.365	0.426	0.727	0.908	0.273
GATA3	-2.441	0.9927	-0.862	0.402	0.728	0.9092	0.272
FLI1	-4.332	1	-6.681	0.48	0.728	0.9092	0.272
KDM3A	-0.623	0.7333	-4.707	0.369	0.729	0.9104	0.271
BCL11B	-1.271	0.8982	-3.913	0.395	0.731	0.9121	0.269
CLOCK	-0.935	0.8251	-5.747	0.389	0.732	0.9132	0.268
PBRM1	-0.792	0.7858	-5.212	0.379	0.734	0.9155	0.266
IRF1	-3.132	0.9991	-0.959	0.404	0.737	0.9182	0.263
ARID1A	-1.979	0.9761	-7.83	0.453	0.739	0.9204	0.261
NCAPD3	-0.708	0.7605	-4.994	0.362	0.744	0.9241	0.256
KANSL3	-1.01	0.8438	-3.503	0.364	0.744	0.9246	0.256
SPIB	-1.458	0.9275	-1.835	0.365	0.748	0.9277	0.252
IRF3	-1.876	0.9697	-1.855	0.38	0.75	0.9296	0.25
RELA	-5.855	1	-1.787	0.418	0.751	0.9301	0.249
BRD9	-1.591	0.9442	-3.063	0.382	0.752	0.9316	0.248
HELLS	-1.083	0.8606	-4.175	0.364	0.755	0.9335	0.245
KLF1	-1.483	0.9309	-7.092	0.416	0.756	0.9345	0.244
PAXIP1	-1.349	0.9113	-2.46	0.345	0.757	0.9354	0.243
HMGA1	-0.741	0.7707	-5.961	0.359	0.758	0.9359	0.242
MYCN	-1.271	0.8981	-6.326	0.39	0.759	0.9368	0.241
SAP18	-1.101	0.8646	-3.08	0.323	0.762	0.939	0.238
CREB1	-5.066	1	-12.545	0.48	0.765	0.9413	0.235
KDM5B	-0.698	0.7574	-7.111	0.363	0.765	0.9413	0.235
TP53	-4.898	1	-7.21	0.461	0.766	0.9426	0.234
BRD4	-8.813	1	-21.529	0.498	0.767	0.9434	0.233
TAF10	-1.281	0.8999	-2.144	0.296	0.772	0.9464	0.228
MLLT3	-2.265	0.9882	-4.327	0.408	0.772	0.9468	0.228
TBX21	-1.162	0.8774	-4.809	0.359	0.773	0.9476	0.227
ZMIZ1	-1.452	0.9267	-5.515	0.382	0.774	0.948	0.226
IKZF1	-2.596	0.9953	-5.1	0.42	0.774	0.9484	0.226
KDM6A	-2.044	0.9795	-6.514	0.414	0.777	0.9504	0.223
STAT1	-6.36	1	-3.094	0.413	0.778	0.9508	0.222
CHD1	-1.148	0.8744	-6.114	0.365	0.779	0.9515	0.221
MYB	-2.094	0.9819	-3.147	0.38	0.78	0.9519	0.22
YY1	-3.288	0.9995	-4.647	0.419	0.78	0.9523	0.22
AICDA	-1.384	0.9169	-6.027	0.379	0.78	0.9523	0.22
MITF	-1.025	0.8472	-5.136	0.332	0.782	0.9534	0.218
MYBL1	-0.996	0.8403	-5.946	0.334	0.783	0.9542	0.217
TOP1	-0.777	0.7815	-8.321	0.355	0.784	0.9549	0.216
ZNF143	-1.174	0.8798	-8.528	0.379	0.786	0.9556	0.214
AURKB	-1.312	0.9052	-2.893	0.291	0.787	0.9567	0.213
E2F3	-1.712	0.9565	-7.282	0.403	0.789	0.9578	0.211
NELFE	-1.205	0.8859	-8.202	0.377	0.79	0.9581	0.21
NELFA	-0.999	0.8412	-6.842	0.334	0.793	0.9602	0.207
BACH2	-1.691	0.9545	-6.775	0.385	0.796	0.9618	0.204
POU2F1	-1.019	0.8458	-6.939	0.332	0.797	0.9622	0.203
ELF4	-2.037	0.9792	-3.677	0.371	0.798	0.9631	0.202
TAF2	-1.306	0.9042	-3.609	0.292	0.799	0.9635	0.201
KMT2A	-1.433	0.9241	-4.627	0.334	0.8	0.9641	0.2
SETDB1	-1.816	0.9653	-7.594	0.395	0.802	0.965	0.198
REPIN1	-0.941	0.8267	-9.318	0.341	0.803	0.9656	0.197
ZBTB16	-1.416	0.9217	-7.87	0.371	0.811	0.9695	0.189
EZH1	-1.333	0.9087	-10.954	0.378	0.811	0.9698	0.189
DPF2	-1.48	0.9306	-5.482	0.337	0.814	0.9711	0.186
HCFC1	-1.666	0.9521	-10.023	0.385	0.816	0.9719	0.184
CEBPE	-1.987	0.9765	-2.736	0.294	0.819	0.9735	0.181
FOXK1	-1.053	0.8538	-10.079	0.329	0.823	0.975	0.177
POLR3GL	-1.452	0.9268	-10.572	0.374	0.823	0.975	0.177
ARID4B	-1.127	0.8701	-8.847	0.319	0.826	0.9762	0.174
NFYC	-1.227	0.89	-7.35	0.307	0.826	0.9765	0.174
NUCKS1	-1.031	0.8486	-11.661	0.331	0.828	0.977	0.172
GFI1B	-1.498	0.9329	-10.123	0.372	0.828	0.977	0.172
TAF3	-1.497	0.9328	-9.355	0.367	0.829	0.9774	0.171
ETS1	-4.579	1	-8.523	0.415	0.829	0.9776	0.171
MEN1	-2.013	0.9779	-9.474	0.382	0.832	0.9788	0.168
RUNX3	-3.125	0.9991	-3.304	0.351	0.833	0.979	0.167
TBP	-4.084	1	-15.592	0.427	0.836	0.9801	0.164
ZBTB2	-1.585	0.9436	-6.206	0.321	0.838	0.9807	0.162
GPS2	-2.422	0.9923	-4.49	0.34	0.84	0.9815	0.16
TGIF1	-2.249	0.9877	-14.495	0.403	0.84	0.9815	0.16
PKNOX1-PKNOX2	-1.142	0.8732	-11.536	0.318	0.84	0.9815	0.16
NFYB	-1.26	0.8962	-8.294	0.3	0.84	0.9815	0.16
POLR2B	-3.226	0.9994	-7.878	0.39	0.842	0.9821	0.158
ZFX	-1.248	0.894	-8.881	0.303	0.842	0.9823	0.158
OSR1	-1.454	0.927	-10.473	0.344	0.844	0.9829	0.156
UBTF	-1.693	0.9548	-10.97	0.371	0.846	0.9835	0.154
POLR3G	-1.15	0.875	-12.583	0.317	0.846	0.9837	0.154
CHD8	-1.679	0.9534	-6.267	0.312	0.847	0.9839	0.153
MSL1	-1.938	0.9737	-7.088	0.34	0.847	0.984	0.153
SPNS1	-2.04	0.9793	-19.449	0.397	0.849	0.9844	0.151
MAPK8	-2.103	0.9823	-10.294	0.378	0.85	0.9848	0.15
PHF6	-1.282	0.9	-9.591	0.296	0.851	0.9851	0.149
CDK9	-2.843	0.9978	-15.842	0.404	0.856	0.9865	0.144
CTR9	-1.575	0.9423	-5.554	0.239	0.856	0.9865	0.144
SIRT6	-1.234	0.8913	-12.695	0.305	0.857	0.987	0.143
TAF12	-2.252	0.9878	-5.25	0.322	0.858	0.9871	0.142
RBBP5	-2.086	0.9815	-7.619	0.354	0.858	0.9871	0.142
EPOP	-1.616	0.9469	-14.701	0.364	0.862	0.988	0.138
NRDC	-1.382	0.9165	-9.544	0.28	0.863	0.9883	0.137
WDR5	-3.446	0.9997	-9.428	0.382	0.864	0.9886	0.136
BRD2	-3.911	1	-14.642	0.402	0.865	0.9889	0.135
CBFB	-2.61	0.9955	-7.152	0.361	0.866	0.9891	0.134
FOXP3	-4.685	1	-5.612	0.363	0.867	0.9894	0.133
OBOX1	-1.352	0.9118	-11.365	0.285	0.868	0.9896	0.132
CXXC1	-4.388	1	-10.807	0.382	0.873	0.9908	0.127
TCF7	-2.14	0.9838	-8.371	0.331	0.876	0.9913	0.124
ELF1	-2.43	0.9924	-7.107	0.33	0.876	0.9914	0.124
TERF2	-1.973	0.9758	-14.343	0.356	0.877	0.9917	0.123
SIN3A	-3.207	0.9993	-15.356	0.383	0.878	0.9919	0.122
HNRNPU	-1.681	0.9536	-11.763	0.317	0.881	0.9925	0.119
KAT5	-1.407	0.9203	-13.585	0.275	0.882	0.9926	0.118
EP400	-2.188	0.9857	-11.703	0.348	0.885	0.9931	0.115
AUTS2	-1.404	0.9199	-17.084	0.276	0.888	0.9936	0.112
HIF1A	-2.438	0.9926	-20.142	0.374	0.889	0.9938	0.111
CDK7	-1.457	0.9274	-14.374	0.265	0.89	0.9939	0.11
KMT2C	-1.794	0.9636	-20.925	0.35	0.89	0.994	0.11
NSL1	-1.349	0.9113	-23.108	0.286	0.894	0.9946	0.106
STAT2	-3.824	0.9999	-8.198	0.337	0.894	0.9947	0.106
E2F1	-3.044	0.9988	-7.607	0.318	0.895	0.9948	0.105
BHLHE41	-1.874	0.9695	-12.433	0.294	0.895	0.9948	0.105
POLR3A	-1.512	0.9348	-13.033	0.251	0.896	0.9949	0.104
NFYA	-2.6	0.9953	-12.487	0.331	0.906	0.9963	0.094
USP16	-1.941	0.9739	-21.966	0.322	0.909	0.9967	0.091
SFMBT1	-1.574	0.9423	-18.996	0.24	0.912	0.9969	0.088
OGT	-2.202	0.9861	-10.805	0.268	0.913	0.9971	0.087
SPIN1	-1.516	0.9352	-21.351	0.25	0.915	0.9973	0.085
SOX4	-1.591	0.9442	-20.462	0.235	0.917	0.9974	0.083
E2F4	-3.183	0.9993	-17.329	0.334	0.922	0.9979	0.078
FOXO1	-2.636	0.9958	-10.999	0.283	0.923	0.998	0.077
GTF2B	-3.678	0.9999	-20.887	0.359	0.925	0.9981	0.075
RAG2	-4.202	1	-12.551	0.326	0.925	0.9981	0.075
IKZF2	-1.625	0.9479	-22.116	0.225	0.926	0.9982	0.074
BRDT	-1.608	0.9461	-48.269	0.23	0.928	0.9983	0.072
SETD1A	-2.035	0.979	-20.652	0.269	0.929	0.9984	0.071
TNFSF11	-2.145	0.984	-15.593	0.254	0.929	0.9984	0.071
NR0B2	-2.14	0.9838	-17.774	0.257	0.93	0.9985	0.07
TFAP4	-2.189	0.9857	-15.77	0.256	0.931	0.9985	0.069
GTF2E2	-2.394	0.9917	-21.337	0.312	0.931	0.9985	0.069
SUPT5H	-3.254	0.9994	-18.741	0.321	0.935	0.9987	0.065
AFF4	-3.034	0.9988	-18.44	0.305	0.936	0.9988	0.064
HES1	-3.671	0.9999	-13.481	0.295	0.936	0.9988	0.064
H3S28ph	-2.068	0.9807	-28.669	0.271	0.937	0.9989	0.063
IRF7	-1.721	0.9574	-56.673	0.156	0.939	0.999	0.061
MORC3	-2.463	0.9931	-20.273	0.286	0.94	0.999	0.06
ASXL1	-1.73	0.9582	-52.904	0.144	0.94	0.999	0.06
RAG1	-4.568	1	-15.949	0.305	0.945	0.9993	0.055
PHF8	-2.146	0.9841	-36.695	0.253	0.947	0.9993	0.053
ING1	-2.697	0.9965	-18.943	0.256	0.949	0.9994	0.051
GABPA	-3.03	0.9988	-23.798	0.287	0.953	0.9995	0.047
LEF1	-2.399	0.9918	-32.734	0.193	0.959	0.9997	0.041
PARP14	-3.402	0.9997	-17.78	0.198	0.961	0.9997	0.039

## Sheet: TFs regulate down DE genes
TF	Wilcoxon test statistic	Wilcoxon test p-value	z-score	max AUC	relative rank	Irwin-Hall_p-value	functional TF rank score
CTCF	18.53	5.863e-77	7.826	0.674	0.022	4.92e-05	0.978
STAG1	5.675	6.923e-09	8.413	0.642	0.041	0.0003209	0.959
REST	3.489	0.0002421	10.555	0.653	0.041	0.0003209	0.959
MEF2C	2.271	0.01157	7.928	0.675	0.055	0.0007687	0.945
EZH2	10.123	2.189e-24	3.169	0.92	0.057	0.0008183	0.943
RAD21	9.329	5.322e-21	6.361	0.617	0.059	0.0009238	0.941
BMI1	3.266	0.0005445	4.201	0.787	0.059	0.0009238	0.941
JARID2	4.722	1.169e-06	3.147	0.928	0.061	0.001038	0.939
SMC1A	5.879	2.058e-09	6.732	0.609	0.064	0.001161	0.936
FOSB	3.333	0.0004294	5.596	0.642	0.065	0.00126	0.935
NEUROD2	4.252	1.059e-05	4.03	0.659	0.067	0.001364	0.933
SUZ12	14.885	2.063e-50	2.659	0.927	0.073	0.001751	0.927
CBX7	3.817	6.757e-05	2.972	0.902	0.074	0.001837	0.926
AEBP2	2.791	0.00263	3.568	0.804	0.075	0.001925	0.925
ISL1	5.8	3.307e-09	6.223	0.591	0.081	0.002356	0.919
MECP2	3.03	0.001224	4.327	0.637	0.084	0.002622	0.916
NPAS4	2.256	0.01204	4.618	0.661	0.085	0.002733	0.915
POU3F1	2.258	0.01198	7.052	0.621	0.089	0.003149	0.911
C17orf96	4.661	1.575e-06	2.473	0.903	0.091	0.003339	0.909
MEF2A	2.037	0.02085	5.686	0.649	0.092	0.00347	0.908
RNF2	9.183	2.103e-20	2.246	0.91	0.093	0.003604	0.907
PCGF6	2.934	0.001676	2.803	0.886	0.095	0.003812	0.905
ATOH1	2.817	0.002427	4.376	0.615	0.098	0.004251	0.902
KDM4C	3.754	8.713e-05	2.624	0.682	0.099	0.004328	0.901
PCGF2	2.399	0.008228	2.915	0.894	0.099	0.004328	0.901
ONECUT2	3.969	3.603e-05	7.371	0.57	0.099	0.004328	0.901
SMC3	4.077	2.285e-05	5.909	0.578	0.1	0.004562	0.9
GTF3C1	2.129	0.01664	4.571	0.644	0.101	0.004642	0.899
PAX6	2.58	0.004941	4.773	0.609	0.102	0.004805	0.898
HOXC9	2.062	0.0196	7.012	0.613	0.104	0.005057	0.896
TET1	3.924	4.362e-05	2.835	0.652	0.105	0.005142	0.895
EOMES	1.569	0.05836	6.054	0.643	0.105	0.005229	0.895
MBD1	1.521	0.06418	4.494	0.711	0.106	0.005405	0.894
MTF2	2.947	0.001607	2.343	0.916	0.107	0.005495	0.893
SOX9	2.993	0.001383	2.647	0.675	0.108	0.005677	0.892
ZFAT	2.218	0.01328	3.575	0.652	0.11	0.006053	0.89
ATRX	2.251	0.01218	3.14	0.672	0.111	0.00615	0.889
KDM2B	5.869	2.193e-09	1.965	0.769	0.111	0.00615	0.889
PHF19	2.335	0.009771	2.659	0.824	0.111	0.00615	0.889
POU3F2	2.698	0.003491	4.31	0.605	0.111	0.00615	0.889
ASCL1	3.539	0.0002005	3.84	0.599	0.115	0.006855	0.885
RYBP	3.698	0.0001089	1.993	0.813	0.116	0.007066	0.884
EED	1.668	0.0477	3.092	0.83	0.12	0.007838	0.88
BTAF1	2.169	0.01505	3.007	0.658	0.121	0.008069	0.879
ZIC1-ZIC2	3.069	0.001074	2.87	0.631	0.121	0.008069	0.879
RFX2	2.149	0.01581	4.009	0.623	0.123	0.008423	0.877
TOP2A	1.808	0.03528	3.265	0.671	0.125	0.008787	0.875
KDM5C	2.582	0.004913	2.248	0.681	0.126	0.008911	0.874
NEUROG2	2.22	0.0132	3.995	0.611	0.127	0.009162	0.873
CBX6	1.688	0.04574	2.872	0.862	0.127	0.009289	0.873
PRDM15	3.387	0.0003539	2.543	0.637	0.128	0.009418	0.872
LHX3	2.447	0.007196	6.1	0.566	0.13	0.009943	0.87
SMARCA4	2.264	0.01178	2.534	0.674	0.131	0.01021	0.869
OLIG2	3.26	0.0005564	3.726	0.58	0.133	0.01049	0.867
PAX7	3.382	0.00036	6.358	0.547	0.133	0.01063	0.867
KMT2D	5.718	5.384e-09	1.367	0.704	0.133	0.01063	0.867
H2AZ	8.54	6.718e-18	1.676	0.666	0.135	0.01105	0.865
FOXG1	1.495	0.06742	5.911	0.609	0.137	0.01149	0.863
WIZ	2.116	0.01718	3.59	0.613	0.137	0.01149	0.863
KDM4A	2.316	0.01027	2.009	0.752	0.137	0.01164	0.863
STAG2	2.033	0.02105	7.79	0.565	0.144	0.01335	0.856
GRHL3	2.724	0.003227	1.713	0.677	0.145	0.01368	0.855
CBX2	1.63	0.05159	2.429	0.721	0.151	0.0154	0.849
SHOX2	2.525	0.005786	3.96	0.567	0.152	0.01576	0.848
KDM2A	2.211	0.01353	2.229	0.656	0.152	0.01576	0.848
SIX2	3.791	7.498e-05	4.214	0.544	0.156	0.01707	0.844
NCOA2	2.142	0.01608	2.385	0.642	0.157	0.01726	0.843
MYOD1	4.625	1.877e-06	3.618	0.546	0.161	0.01865	0.839
PDX1	1.397	0.08121	10.227	0.576	0.161	0.01865	0.839
RFX6	1.497	0.06719	3.77	0.609	0.162	0.01906	0.838
NCAPH2	2.238	0.0126	1.621	0.698	0.163	0.01947	0.837
BHLHA15	1.747	0.04028	3.921	0.586	0.164	0.01989	0.836
PTF1A	2.297	0.01082	2.856	0.59	0.165	0.02011	0.835
INO80	1.776	0.03784	1.903	0.676	0.171	0.02255	0.829
INSM1	1.383	0.08336	6.101	0.572	0.173	0.02325	0.827
MEN1	3.287	0.0005057	0.772	0.656	0.175	0.02421	0.825
NR4A1	1.538	0.06206	4.724	0.564	0.176	0.02445	0.824
FOXP1	1.494	0.06758	3.1	0.608	0.178	0.02544	0.822
UTF1	2.153	0.01564	2.658	0.586	0.181	0.02671	0.819
POLR3D	2.645	0.004084	4.004	0.537	0.182	0.02697	0.818
CBX8	0.589	0.278	4.13	0.677	0.183	0.02749	0.817
HOXB5	1.566	0.05871	2.243	0.641	0.183	0.02749	0.817
ONECUT1	1.426	0.07698	5.011	0.567	0.183	0.02776	0.817
HELLS	2.261	0.01187	1	0.67	0.184	0.02802	0.816
SMARCC2	1.436	0.07544	5.333	0.56	0.187	0.02938	0.813
HEY1	2.061	0.01964	2.551	0.588	0.19	0.03106	0.81
TAF9B	1.493	0.06765	2.838	0.608	0.191	0.03135	0.809
EHF	1.489	0.0682	2.838	0.606	0.192	0.03193	0.808
POU3F3	1.434	0.07583	3.39	0.585	0.192	0.03193	0.808
PHIP	1.985	0.02359	2.435	0.596	0.193	0.03222	0.807
MZF1	1.974	0.02421	5.006	0.532	0.196	0.03371	0.804
FEZF2	2.078	0.01885	1.822	0.617	0.196	0.03401	0.804
PBX1	1.744	0.04054	2.85	0.579	0.197	0.03432	0.803
TOP2B	1.175	0.12	3.328	0.616	0.199	0.03524	0.801
ZBTB17	2.083	0.01863	2.472	0.577	0.203	0.03746	0.797
SIRT1	2.359	0.009162	2.76	0.552	0.203	0.03746	0.797
PITX1	2.007	0.02237	4.046	0.538	0.203	0.03779	0.797
HEXIM1	1.484	0.0689	2.588	0.604	0.203	0.03779	0.797
DPPA2	1.412	0.07892	3.254	0.579	0.206	0.03911	0.794
HOXA13	1.291	0.09834	5.099	0.553	0.208	0.04045	0.792
DMC1	2.445	0.007238	10.977	0.487	0.21	0.04183	0.79
NKX2-2	1.905	0.02837	4.182	0.531	0.21	0.04183	0.79
ESRRA	1.174	0.1203	3.539	0.592	0.211	0.04253	0.789
CHRM2	1.575	0.05764	2.032	0.603	0.213	0.04324	0.787
RFX1	1.53	0.06306	1.78	0.623	0.214	0.04396	0.786
OTX2	0.856	0.1961	3.328	0.61	0.217	0.04579	0.783
SAP130	1.585	0.05646	0.781	0.654	0.217	0.04616	0.783
KDM5B	1.522	0.06394	1.703	0.619	0.22	0.04766	0.78
NFIB	1.847	0.03239	3.022	0.545	0.221	0.04843	0.779
RBFOX2	1.43	0.07634	2.578	0.584	0.223	0.04998	0.777
WT1	2.569	0.005106	2.019	0.549	0.224	0.05077	0.776
RBBP5	2.711	0.003351	0.245	0.607	0.227	0.05237	0.773
KDM1A	2.552	0.005357	-0.66	0.674	0.228	0.05319	0.772
CXXC1	4.401	5.4e-06	-0.611	0.628	0.231	0.05526	0.769
RFX3	1.353	0.088	2.97	0.566	0.231	0.05526	0.769
FGFR1	1.91	0.02804	2.569	0.548	0.232	0.05653	0.768
GATA4	2.396	0.008289	1.938	0.549	0.234	0.05738	0.766
ATF4	1.234	0.1086	2.377	0.605	0.234	0.05738	0.766
HOXD13	1.227	0.11	4.649	0.543	0.234	0.05738	0.766
FOXO3	1.314	0.0945	3.228	0.557	0.234	0.05782	0.766
RARB	1.217	0.1118	4.633	0.54	0.236	0.05912	0.764
NKX6-1	1.2	0.115	5.169	0.538	0.237	0.06	0.763
NEUROD1	1.291	0.09836	3.37	0.551	0.238	0.06045	0.762
SIX4	1.264	0.1031	3.413	0.549	0.241	0.0627	0.759
MEF2D	1.91	0.02806	2.922	0.528	0.241	0.06316	0.759
LHX2	1.224	0.1105	5.611	0.523	0.245	0.06643	0.755
HMGA2	1.459	0.07234	1.699	0.591	0.245	0.06643	0.755
ZC3H11A	1.174	0.1202	6.1	0.525	0.246	0.0669	0.754
SMCHD1	1.296	0.09753	2.951	0.554	0.246	0.0669	0.754
ARID4B	1.531	0.06291	0.478	0.624	0.248	0.06834	0.752
PRDM13	1.77	0.0384	1.876	0.56	0.252	0.07179	0.748
NUP153	1.19	0.1169	4.239	0.537	0.252	0.07229	0.748
HOXD11	1.199	0.1153	4.165	0.538	0.252	0.07229	0.748
H3F3B	1.241	0.1072	17.668	0.501	0.254	0.0738	0.746
CDX2	0.804	0.2107	6.038	0.534	0.255	0.07483	0.745
SIRT6	1.537	0.06218	0.18	0.626	0.255	0.07483	0.745
HRAS	1.531	0.06294	0.642	0.605	0.256	0.07586	0.744
CRX	1.39	0.0822	4.997	0.506	0.258	0.0769	0.742
PAX3	1.006	0.1573	6.506	0.517	0.259	0.07848	0.741
PRDM9	0.562	0.2872	3.937	0.567	0.262	0.08116	0.738
NPAS3	1.355	0.08771	2.118	0.566	0.263	0.0817	0.737
SOX3	1.436	0.07552	2.924	0.529	0.264	0.0828	0.736
SMARCB1	2.085	0.01854	1.641	0.547	0.265	0.08335	0.735
FAM60A	1.432	0.07608	1.288	0.585	0.266	0.08502	0.734
NRF1	2.462	0.006911	0.981	0.544	0.268	0.08671	0.732
SRSF2	1.334	0.09116	1.98	0.561	0.273	0.09191	0.727
TCF12	1.278	0.1006	2.191	0.553	0.278	0.0967	0.722
HSF2	0.817	0.207	10.389	0.502	0.279	0.09792	0.721
ZACN	1.452	0.07321	2.613	0.525	0.28	0.09854	0.72
ZIC2	1.123	0.1307	1.894	0.577	0.282	0.1004	0.718
TBX5	1.232	0.109	2.544	0.543	0.283	0.1017	0.717
NKX2-1	0.405	0.3429	3.313	0.572	0.283	0.1023	0.717
JMJD6	1.009	0.1564	4.067	0.517	0.284	0.1036	0.716
MYOG	1.578	0.05733	2.382	0.515	0.285	0.1042	0.715
H4K8BU	1.079	0.1403	3.336	0.525	0.288	0.1074	0.712
RUNX2	2.099	0.01791	1.253	0.532	0.289	0.1081	0.711
TBX19	1.123	0.1307	3.901	0.515	0.289	0.1081	0.711
NOTCH1	1.462	0.0719	-0.084	0.603	0.29	0.1101	0.71
MYBL1	1.347	0.08894	1.346	0.564	0.291	0.1107	0.709
PHF6	1.429	0.07651	0.475	0.584	0.291	0.1114	0.709
MAPK8	2.307	0.01052	-0.2	0.561	0.292	0.1121	0.708
KDM5A	2.411	0.007965	0.491	0.533	0.293	0.1134	0.707
FOS	0.636	0.2625	0.781	0.641	0.296	0.1169	0.704
CBX5	0.813	0.208	5.173	0.502	0.297	0.1182	0.703
EGR2	1.234	0.1086	3.065	0.509	0.3	0.1218	0.7
CTCFL	1.107	0.1342	2.837	0.528	0.302	0.1239	0.698
PBX3	1.213	0.1126	2.159	0.539	0.303	0.1253	0.697
SMAD2-SMAD3	1.503	0.0664	1.472	0.53	0.308	0.132	0.692
MYF5	1.164	0.1223	3.213	0.505	0.311	0.135	0.689
DDX21	1.203	0.1144	1.959	0.538	0.313	0.1381	0.687
BAZ1B	0.675	0.2497	7.815	0.485	0.316	0.142	0.684
E2F1	1.814	0.03483	-1.317	0.611	0.318	0.1451	0.682
DPY30	1.251	0.1055	1.228	0.546	0.321	0.1484	0.679
NUCKS1	1.371	0.08519	-0.045	0.57	0.322	0.1508	0.678
HSF1	0.512	0.3042	4.295	0.508	0.327	0.1575	0.673
MAX	0.684	0.2469	0.802	0.585	0.329	0.16	0.671
KLF15	1.237	0.108	1.585	0.532	0.329	0.16	0.671
KMT2C	2.171	0.01496	-2.489	0.635	0.331	0.1626	0.669
TFAP2C	0.583	0.2798	1.4	0.572	0.331	0.1626	0.669
HAND2	1.037	0.15	2.288	0.52	0.331	0.1626	0.669
TLE	0.608	0.2716	5.267	0.485	0.334	0.1669	0.666
TBX3	0.978	0.1641	1.795	0.537	0.336	0.1713	0.664
HMGA1	1.206	0.1139	1.116	0.538	0.339	0.1749	0.661
CTNNB1	0.201	0.4204	2.331	0.567	0.34	0.1768	0.66
TDG	0.977	0.1644	2.192	0.515	0.345	0.1841	0.655
RCOR2	0.928	0.1768	2.4	0.51	0.347	0.1879	0.653
SIN3A	2.638	0.004166	-2.238	0.574	0.347	0.1879	0.653
MAFA	0.668	0.252	3.654	0.489	0.349	0.1907	0.651
ZBTB2	1.477	0.06984	-0.109	0.538	0.349	0.1917	0.651
FAIRE	0.519	0.3017	0.261	0.599	0.35	0.1926	0.65
SMARCA5	0.608	0.2716	3.077	0.498	0.353	0.1975	0.647
LHX6	1.014	0.1553	1.715	0.518	0.355	0.2014	0.645
KDM6B	0.796	0.2129	0.082	0.569	0.356	0.2034	0.644
TFAP2A	1.385	0.08297	1.274	0.504	0.358	0.2063	0.642
PRDM5	0.971	0.1657	1.852	0.514	0.361	0.2113	0.639
GMNN	0.692	0.2443	4.712	0.465	0.362	0.2134	0.638
RBPJ	1.111	0.1332	-0.135	0.558	0.363	0.2154	0.637
SMARCC1	0.774	0.2196	2.486	0.498	0.366	0.2205	0.634
FOXA2	0.4	0.3447	1.905	0.543	0.367	0.2216	0.633
RAP1A	0.598	0.275	3.354	0.484	0.367	0.2226	0.633
KAT8	1.454	0.07292	0.62	0.503	0.368	0.2236	0.632
ZIC1	0.537	0.2958	4.866	0.467	0.371	0.2299	0.629
FOSL2	0.895	0.1853	1.694	0.512	0.372	0.231	0.628
GFI1	1.184	0.1181	-1.191	0.596	0.373	0.232	0.627
MTA2	0.944	0.1727	1.676	0.512	0.373	0.2331	0.627
TRIM28	-1.383	0.9167	2.778	0.625	0.374	0.2341	0.626
MEIS1	-0.024	0.5094	1.934	0.562	0.376	0.2384	0.624
SOX10	1.24	0.1075	0.4	0.515	0.377	0.2406	0.623
TCF7L1	-0.076	0.5304	0.946	0.598	0.38	0.2449	0.62
NKX2-5	0.722	0.235	2.167	0.497	0.382	0.2493	0.618
SRF	0.98	0.1635	0.57	0.523	0.385	0.2548	0.615
H1F0	0.329	0.3713	6.485	0.462	0.388	0.2614	0.612
CREBBP	-0.479	0.6839	0.198	0.648	0.39	0.2648	0.61
PHOX2A	0.726	0.2338	1.979	0.494	0.39	0.2648	0.61
OSR1	1.447	0.07391	-0.692	0.526	0.391	0.267	0.609
NACC1	0.555	0.2896	2.92	0.48	0.394	0.2727	0.606
H4K5BU	0.83	0.2033	1.275	0.503	0.395	0.275	0.605
ESR1	-0.308	0.6211	0.177	0.628	0.397	0.2784	0.603
METTL3	0.387	0.3493	0.278	0.556	0.399	0.2819	0.601
KLF1	0.964	0.1674	-0.606	0.548	0.401	0.2853	0.599
ING1	1.813	0.03494	-3.5	0.571	0.403	0.29	0.597
RBPJL	0.947	0.1718	1.162	0.492	0.407	0.2982	0.593
SP7	1.216	0.112	1.025	0.485	0.408	0.2994	0.592
MYC	1.521	0.06417	-3.604	0.58	0.41	0.3041	0.59
UBTF	1.408	0.07959	-0.584	0.508	0.413	0.31	0.587
ELK1	0.301	0.3816	4.309	0.459	0.415	0.3136	0.585
DLX5	0.743	0.2286	1.761	0.482	0.419	0.3233	0.581
PHC1	0.636	0.2623	1.951	0.479	0.42	0.3245	0.58
NKX3-2	0.38	0.352	2.922	0.472	0.42	0.3245	0.58
E2F3	0.506	0.3064	-2.351	0.645	0.421	0.3257	0.579
MYCN	1.188	0.1174	-0.663	0.52	0.421	0.3269	0.579
TCF4	0.039	0.4845	0.063	0.567	0.423	0.3306	0.577
TEAD2	0.29	0.3859	2.956	0.475	0.423	0.3306	0.577
TET2	0.541	0.2942	-0.867	0.562	0.425	0.3342	0.575
DMRT1	0.236	0.4067	4.598	0.448	0.426	0.3379	0.574
LDB1	0.02	0.4921	1.677	0.524	0.427	0.3392	0.573
KANSL3	0.884	0.1885	0.254	0.499	0.428	0.3404	0.572
PRDM1	0.798	0.2125	-0.651	0.53	0.428	0.3416	0.572
SPIN1	1.318	0.09371	-2.424	0.559	0.43	0.3453	0.57
FOXL2	0.476	0.3171	2.746	0.464	0.432	0.349	0.568
CHD4	-0.504	0.693	-0.568	0.629	0.433	0.3515	0.567
YAP1	0.516	0.3031	2.158	0.477	0.433	0.3528	0.567
ELOB	0.809	0.2094	0.054	0.501	0.435	0.3553	0.565
MAFG	0.107	0.4573	5.589	0.442	0.435	0.3565	0.565
ARID1A	1.523	0.06384	-1.422	0.508	0.435	0.3565	0.565
BACH2	0.351	0.3628	-2.23	0.636	0.437	0.3603	0.563
TAF7L	0.691	0.2448	-1.273	0.546	0.448	0.3842	0.552
NCOR1	-0.892	0.8137	0.527	0.581	0.449	0.3855	0.551
FOXD3	0.163	0.4351	1.335	0.491	0.463	0.4176	0.537
TLX1	0.539	0.2948	1.149	0.469	0.468	0.4279	0.532
MCRS1	0.575	0.2825	-0.09	0.49	0.473	0.4396	0.527
KMT2B	0.115	0.4541	-0.91	0.552	0.475	0.4436	0.525
KDM4B	0.477	0.3166	1.021	0.474	0.475	0.4449	0.525
DNMT3A	0.171	0.432	1.861	0.472	0.476	0.4462	0.524
NR6A1	0.479	0.316	1.336	0.464	0.479	0.4527	0.521
DDIT3	0.332	0.3699	1.808	0.462	0.481	0.4566	0.519
MSL1	0.183	0.4272	-2.351	0.59	0.481	0.4566	0.519
HNRNPU	1.285	0.09934	-2.236	0.509	0.483	0.4619	0.517
ERF	0.581	0.2807	0.042	0.479	0.485	0.4658	0.515
PHF5A	0.417	0.3382	0.924	0.469	0.486	0.4684	0.514
BIRA	-0.488	0.6871	1.01	0.514	0.487	0.471	0.513
GLI1	0.397	0.3456	1.054	0.467	0.487	0.471	0.513
ZMYND8	0.537	0.2957	0.128	0.478	0.487	0.471	0.513
NIPBL	0.631	0.264	-0.811	0.495	0.489	0.4763	0.511
NFIA	0.457	0.324	0.595	0.471	0.489	0.4763	0.511
HDAC2	-0.529	0.7015	-1.958	0.63	0.491	0.4802	0.509
DNMT3B	0.366	0.3573	-1.619	0.539	0.498	0.4947	0.502
CHD7	-0.449	0.6733	0.017	0.525	0.498	0.4947	0.502
SREBF1	-0.737	0.7696	-0.887	0.574	0.502	0.5039	0.498
AR	-0.206	0.5815	2.007	0.465	0.504	0.5091	0.496
POLR3GL	0.759	0.2239	-2.187	0.516	0.505	0.5117	0.495
NKX3-1	0.123	0.4512	2.18	0.442	0.507	0.5157	0.493
POU5F1	-5.987	1	0.194	0.637	0.508	0.517	0.492
SALL4	-1.374	0.9152	0.213	0.555	0.509	0.5209	0.491
PBRM1	0.768	0.2214	-1.096	0.484	0.513	0.5288	0.487
PR	0.286	0.3874	0.34	0.468	0.515	0.5341	0.485
RAD51	-0.058	0.5231	2.312	0.441	0.517	0.538	0.483
ZFP57	-1.355	0.9123	-0.917	0.6	0.519	0.5419	0.481
HNF1B	0.106	0.4577	1.332	0.458	0.519	0.5419	0.481
DICER1	0.584	0.2795	-0.759	0.478	0.519	0.5432	0.481
TERF2	1.067	0.143	-3.562	0.514	0.521	0.5471	0.479
CRTC2	0.286	0.3874	0.972	0.454	0.521	0.5471	0.479
SMAD4	0.128	0.4493	-2.604	0.557	0.525	0.5563	0.475
TAF3	1.04	0.1492	-2.393	0.494	0.525	0.5563	0.475
CUX2	-0.08	0.5318	2.522	0.428	0.526	0.5576	0.474
FOXA1	-0.585	0.7206	1.126	0.485	0.529	0.5641	0.471
JUNB	-3.721	0.9999	-0.747	0.657	0.529	0.5641	0.471
MSX1	0.136	0.4459	1.183	0.444	0.533	0.5745	0.467
SMARCAD1	0.104	0.4585	1.536	0.442	0.534	0.5758	0.466
HDAC1	-0.094	0.5375	-4.207	0.588	0.535	0.5784	0.465
PKNOX1	0.437	0.3312	-1.01	0.481	0.542	0.5939	0.458
RXRA	-3.442	0.9997	-0.139	0.585	0.548	0.6067	0.452
JUN	-1.001	0.8415	-0.304	0.519	0.548	0.6067	0.452
MED12	0.059	0.4764	-1.817	0.523	0.548	0.608	0.452
HIRA	0.005	0.4981	1.48	0.434	0.55	0.6105	0.45
SMAD1	0.124	0.4508	-1.303	0.499	0.553	0.6182	0.447
REPIN1	0.575	0.2825	-1.648	0.483	0.554	0.6194	0.446
KCR	0.169	0.4327	-2.071	0.512	0.557	0.627	0.443
ZNF384	-0.244	0.5965	1.784	0.433	0.558	0.6283	0.442
DLX3	0.267	0.3947	-0.29	0.456	0.559	0.6308	0.441
BCL6	-1.072	0.8583	1.309	0.476	0.56	0.6333	0.44
RAD23B	0.219	0.4134	-0.01	0.447	0.562	0.6371	0.438
WDR5	-0.748	0.7728	-4.906	0.623	0.567	0.6483	0.433
MXI1	0.483	0.3147	-1.63	0.477	0.568	0.6508	0.432
EBF2	-0.646	0.7408	-0.272	0.489	0.569	0.652	0.431
ZFX	0.558	0.2886	-2.157	0.48	0.569	0.6533	0.431
NFATC1	-0.299	0.6176	0.926	0.445	0.572	0.6582	0.428
HDAC3	-4.852	1	-1.371	0.637	0.572	0.6595	0.428
SOX2	-7.148	1	0.105	0.562	0.572	0.6595	0.428
EZH1	0.573	0.2833	-4.301	0.507	0.573	0.6607	0.427
SP1	0.292	0.3852	-3.457	0.514	0.574	0.6632	0.426
SRC	-0.103	0.541	-0.184	0.459	0.578	0.6705	0.422
RAG1	1.153	0.1244	-5.622	0.49	0.579	0.6741	0.421
SPI1	-11.584	1	-1.61	0.646	0.581	0.6778	0.419
TEAD4	-0.274	0.608	0.311	0.448	0.582	0.679	0.418
OBOX1	0.598	0.2748	-3.311	0.484	0.583	0.6814	0.417
CEBPG	-0.119	0.5474	0.823	0.424	0.583	0.6826	0.417
SETD1A	0.774	0.2194	-7.124	0.505	0.586	0.6886	0.414
MBD2	-0.378	0.6473	0.54	0.443	0.587	0.6898	0.413
MSL2	0.089	0.4646	-0.453	0.447	0.59	0.6958	0.41
DGCR8	-0.644	0.7401	-1.096	0.5	0.59	0.6969	0.41
FOXF1	0.028	0.4886	-0.174	0.44	0.592	0.7005	0.408
RAG2	0.592	0.2769	-5.096	0.498	0.595	0.7052	0.405
DPF2	0.083	0.467	-2.335	0.493	0.595	0.7052	0.405
SUMO2	-0.291	0.6144	0.61	0.43	0.596	0.7087	0.404
TGIF1	-0.116	0.546	-6.404	0.552	0.598	0.711	0.402
EPOP	0.451	0.3259	-5.61	0.511	0.598	0.7122	0.402
TEAD1	-0.196	0.5777	0.259	0.429	0.6	0.7157	0.4
NFYA	0.689	0.2453	-3.963	0.477	0.6	0.7168	0.4
ZBTB16	0.44	0.3301	-2.232	0.466	0.602	0.7203	0.398
NANOG	-4.745	1	0.471	0.516	0.603	0.7214	0.397
NELFB	0.311	0.3778	-1.573	0.46	0.603	0.7226	0.397
STAT5A	-2.118	0.9829	0.764	0.491	0.604	0.7237	0.396
SATB1	-1.091	0.8624	-2.372	0.543	0.605	0.726	0.395
MBD3	-1.66	0.9516	-0.23	0.501	0.607	0.7294	0.393
ZFP281	-1.148	0.8745	-1.656	0.527	0.607	0.7306	0.393
JUND	-1.704	0.9558	-0.309	0.504	0.61	0.7351	0.39
HIF1A	0.323	0.3734	-9.969	0.522	0.613	0.7407	0.387
SFMBT1	0.614	0.2695	-5.796	0.485	0.614	0.7429	0.386
TGIF2	-0.061	0.5243	-0.311	0.429	0.616	0.7462	0.384
YY1	-0.784	0.7836	-2.434	0.52	0.619	0.7528	0.381
KAT5	0.518	0.3022	-4.182	0.477	0.619	0.7528	0.381
ESRRB	-1.255	0.8952	0.055	0.465	0.62	0.7539	0.38
NELFA	0.346	0.3648	-2.279	0.463	0.62	0.7539	0.38
BHLHE40	-0.267	0.6054	-0.062	0.425	0.62	0.755	0.38
H2AFX	-0.244	0.5964	-1.252	0.466	0.62	0.755	0.38
ASH2L	-0.683	0.7528	-1.318	0.487	0.621	0.7571	0.379
NCAPD3	0.228	0.4096	-1.611	0.452	0.622	0.7582	0.378
E2F4	0.491	0.3119	-7.153	0.496	0.624	0.7615	0.376
KLF4	-1.429	0.9235	-1.846	0.53	0.627	0.7668	0.373
BRD2	0.376	0.3534	-6.082	0.497	0.627	0.7668	0.373
ETV4	-0.195	0.5772	-0.278	0.419	0.627	0.7678	0.373
NR3C1	-5.324	1	-0.032	0.511	0.628	0.77	0.372
NP23	-0.375	0.6461	0.392	0.407	0.629	0.771	0.371
GATA6	-1.126	0.8699	0.395	0.443	0.63	0.7721	0.37
PKNOX1-PKNOX2	0.411	0.3406	-3.697	0.468	0.63	0.7731	0.37
TEC	-0.29	0.6142	-0.454	0.433	0.633	0.7783	0.367
DMRTB1	0.126	0.4498	-1.508	0.443	0.634	0.7793	0.366
ETV5	-0.246	0.597	-0.168	0.415	0.634	0.7804	0.366
SETDB1	-0.24	0.5949	-2.449	0.483	0.638	0.7865	0.362
KLF3	0.078	0.469	-2.875	0.474	0.638	0.7875	0.362
SF1	0.172	0.4316	-1.773	0.447	0.638	0.7875	0.362
FOXA3	-0.568	0.7151	0.785	0.394	0.64	0.7895	0.36
POLR2A	-2.107	0.9824	-11.448	0.65	0.641	0.7926	0.359
CLOCK	0.279	0.3901	-2.467	0.456	0.643	0.7955	0.357
RPA	-1.568	0.9416	0.582	0.453	0.644	0.7965	0.356
IKZF1	-1.912	0.9721	-4.414	0.58	0.645	0.7995	0.355
BCL11B	-0.036	0.5144	-1.732	0.452	0.649	0.8053	0.351
NFIL3	-0.614	0.7305	0.708	0.391	0.649	0.8053	0.351
BATF	-2.058	0.9802	-0.371	0.485	0.65	0.8072	0.35
CDK9	0.307	0.3794	-7.874	0.489	0.651	0.8082	0.349
KDM6A	-0.614	0.7305	-4.317	0.512	0.652	0.8111	0.348
EP300	-6.258	1	-5.013	0.64	0.655	0.8148	0.345
NSL1	0.501	0.3083	-7.439	0.475	0.655	0.8158	0.345
RCOR1	-0.509	0.6946	-0.314	0.413	0.657	0.8185	0.343
PROX1	-1.046	0.8521	1.041	0.394	0.657	0.8185	0.343
CEBPB	-6.06	1	-0.127	0.491	0.659	0.8213	0.341
POLR2B	0.232	0.4083	-3.564	0.457	0.66	0.8231	0.34
HES1	-1.413	0.9212	-9.098	0.568	0.663	0.8277	0.337
AUTS2	0.413	0.3397	-6.389	0.468	0.663	0.8277	0.337
MTOR	-0.372	0.6452	-0.605	0.407	0.664	0.8285	0.336
ARNTL	-1.101	0.8646	-2.423	0.491	0.667	0.8338	0.333
THRA	-0.473	0.6819	-0.392	0.401	0.668	0.8347	0.332
ATF7IP	-0.485	0.6863	-0.384	0.4	0.67	0.8382	0.33
STAT5B	-3.335	0.9996	-0.925	0.504	0.671	0.8399	0.329
GRHL2	-0.632	0.7362	0.011	0.39	0.672	0.8407	0.328
THRB	-0.436	0.6686	-0.825	0.413	0.672	0.8407	0.328
TFAP4	0.435	0.3317	-6.088	0.462	0.672	0.8416	0.328
TBX21	-0.148	0.5587	-2.033	0.441	0.673	0.8433	0.327
VDR	-1.202	0.8853	-1.245	0.464	0.676	0.8474	0.324
GTF2B	-0.191	0.5757	-11.534	0.501	0.677	0.8483	0.323
MAZ	-0.172	0.5681	-1.72	0.431	0.679	0.8507	0.321
TMPRSS4	-0.589	0.7221	-1.178	0.435	0.679	0.8515	0.321
BRD4	-3.881	0.9999	-15.142	0.631	0.681	0.854	0.319
GATA2	-3.019	0.9987	-0.9	0.491	0.683	0.8564	0.317
GPS2	-2.228	0.9871	-4.283	0.548	0.684	0.8579	0.316
RARA	-1.807	0.9646	-1.15	0.478	0.686	0.8611	0.314
LMO2	-1.774	0.962	-1.299	0.48	0.688	0.8634	0.312
PHF8	0.397	0.3456	-15.621	0.467	0.689	0.8649	0.311
USP16	-0.224	0.5886	-11.804	0.492	0.691	0.8672	0.309
POLR3G	0.221	0.4126	-4.816	0.452	0.692	0.8679	0.308
STAT1	-6.096	1	-3.008	0.547	0.692	0.8687	0.308
NFYB	0.043	0.4828	-3.343	0.437	0.694	0.8716	0.306
SS18	-2.673	0.9962	-0.45	0.465	0.696	0.8731	0.304
TCF3	-2.477	0.9934	-3.012	0.52	0.701	0.8796	0.299
NFYC	-0.037	0.5149	-3.021	0.431	0.702	0.881	0.298
CAPG	-0.413	0.6601	-3.283	0.453	0.703	0.8817	0.297
BHLHE41	0.172	0.4317	-5.406	0.446	0.703	0.8824	0.297
HCFC1	-0.581	0.7193	-6.291	0.488	0.704	0.8831	0.296
STAT3	-3.447	0.9997	-4.531	0.55	0.706	0.8858	0.294
CREB1	-2.581	0.9951	-9.606	0.567	0.707	0.8872	0.293
TOP1	0.044	0.4823	-4.277	0.437	0.708	0.8885	0.292
MORC3	-0.245	0.5969	-11.232	0.483	0.708	0.8885	0.292
ETV6	-0.666	0.7473	-5.931	0.486	0.708	0.8885	0.292
ELK3	-0.764	0.7775	-1.06	0.407	0.709	0.8892	0.291
NR0B2	0.08	0.4681	-8.384	0.463	0.709	0.8892	0.291
RXRG	-2.016	0.9781	-0.769	0.454	0.71	0.8898	0.29
RUNX1	-2.629	0.9957	-3.792	0.527	0.712	0.8925	0.288
NCOR2	-1.151	0.8752	-1.056	0.424	0.712	0.8925	0.288
TP63	-0.826	0.7955	-0.523	0.374	0.713	0.8931	0.287
MAFK	-1.092	0.8627	-0.827	0.408	0.713	0.8931	0.287
SMAD3	-3.277	0.9995	-5.883	0.555	0.714	0.8944	0.286
PER1	-0.823	0.7949	-0.671	0.374	0.717	0.8983	0.283
ATF7	-0.725	0.7658	-0.862	0.383	0.718	0.8995	0.282
NR5A2	-1.326	0.9075	-0.897	0.421	0.718	0.8995	0.282
MYB	-1.888	0.9705	-2.886	0.49	0.721	0.902	0.279
ATF2	-0.84	0.7997	-0.949	0.395	0.722	0.9038	0.278
ZFPM1	-0.86	0.805	-0.739	0.371	0.724	0.905	0.276
ZKSCAN1	-0.527	0.7007	-2.174	0.415	0.725	0.9062	0.275
EBF1	-2.494	0.9937	-1.136	0.462	0.727	0.908	0.273
STAT4	-1.444	0.9256	-4.72	0.491	0.73	0.9115	0.27
POU2F1	-0.194	0.5767	-3.644	0.419	0.73	0.9115	0.27
ARID3A	-1.438	0.9247	-1.213	0.432	0.731	0.9127	0.269
ASCL2	-0.559	0.7119	-1.636	0.395	0.731	0.9127	0.269
IRF4	-2.853	0.9978	-0.956	0.461	0.732	0.9132	0.268
HNF4A	-3.292	0.9995	-0.1	0.429	0.732	0.9132	0.268
SPNS1	-0.138	0.5548	-10.203	0.457	0.734	0.9149	0.266
RORC	-0.82	0.7938	-2.684	0.437	0.735	0.9166	0.265
IRF2	-0.949	0.8287	-1.979	0.421	0.736	0.9171	0.264
TFCP2	-1.016	0.8451	-0.747	0.355	0.736	0.9171	0.264
TAL1	-6.175	1	-1.323	0.478	0.737	0.9177	0.263
PRDM14	-1.242	0.8929	-0.303	0.329	0.737	0.9177	0.263
AIRE	-0.669	0.7483	-3.411	0.439	0.737	0.9177	0.263
HNF4G	-1.491	0.9321	-0.32	0.387	0.737	0.9182	0.263
CRY2	-1.596	0.9448	-0.349	0.396	0.737	0.9182	0.263
GFI1B	-0.224	0.5887	-5.546	0.442	0.738	0.9188	0.262
MED1	-6.227	1	-4.638	0.531	0.738	0.9193	0.262
CEBPA	-7.032	1	-0.921	0.464	0.74	0.9209	0.26
ERG	-1.794	0.9636	-3.8	0.487	0.74	0.9209	0.26
PAX5	-2.806	0.9975	-2.213	0.48	0.741	0.922	0.259
TFE3	-1.59	0.9441	-1.115	0.426	0.741	0.922	0.259
PER2	-1.426	0.9231	-0.684	0.39	0.744	0.9241	0.256
EP400	-1.145	0.8738	-8.628	0.486	0.744	0.9241	0.256
NELFE	-0.325	0.6275	-4.76	0.437	0.744	0.9246	0.256
AICDA	-0.76	0.7765	-4.482	0.453	0.745	0.9251	0.255
CDK7	-0.001	0.5002	-6.933	0.434	0.746	0.9261	0.254
HLF	-1.163	0.8776	-0.685	0.339	0.749	0.9287	0.251
KLF5	-1.132	0.8712	-1.66	0.411	0.749	0.9291	0.251
CRY1	-1.852	0.968	-0.507	0.395	0.751	0.9301	0.249
GATA3	-2.151	0.9843	-0.675	0.409	0.755	0.9335	0.245
STAT2	-1.024	0.847	-4.794	0.457	0.757	0.9354	0.243
ELL3	-1.07	0.8576	-1.129	0.349	0.758	0.9359	0.242
USF1	-1.145	0.8738	-1.491	0.391	0.759	0.9372	0.241
AFF4	-0.835	0.7981	-11.19	0.466	0.762	0.939	0.238
PPARA	-2.945	0.9984	-0.406	0.407	0.762	0.9395	0.238
SOX17	-2.455	0.993	-0.845	0.416	0.763	0.9404	0.237
SMAD2	-1.401	0.9194	-0.879	0.362	0.763	0.9404	0.237
EHMT2	-1.48	0.9306	-0.302	0.293	0.763	0.9404	0.237
ZNF143	-0.442	0.6707	-6.19	0.434	0.765	0.9413	0.235
TBP	-1.806	0.9646	-11.053	0.501	0.766	0.9421	0.234
EGR1	-0.57	0.7155	-4.305	0.417	0.767	0.943	0.233
NR1H2	-1.899	0.9712	-0.442	0.361	0.769	0.9443	0.231
NR1D2	-1.432	0.9239	-1.19	0.386	0.769	0.9447	0.231
ELF5	-2.175	0.9852	-1.301	0.423	0.772	0.9464	0.228
BATF3	-1.543	0.9386	-0.945	0.382	0.772	0.9464	0.228
SUPT5H	-0.516	0.6971	-10.45	0.444	0.772	0.9464	0.228
GATA1	-6.606	1	-1.871	0.465	0.773	0.9476	0.227
FOXK1	-0.237	0.5938	-6.429	0.415	0.773	0.9476	0.227
TAF1	-0.87	0.8078	-4.674	0.435	0.773	0.9476	0.227
PPARGC1A	-1.262	0.8965	-1.53	0.383	0.774	0.948	0.226
AHR	-1.558	0.9404	-1.479	0.396	0.778	0.9508	0.222
MAF	-2.014	0.978	-1.382	0.412	0.779	0.9515	0.221
IKZF2	-0.175	0.5695	-12.33	0.42	0.78	0.9523	0.22
CBFB	-1.258	0.8958	-4.837	0.448	0.782	0.9534	0.218
GABPA	-1.196	0.8841	-16.184	0.469	0.783	0.9538	0.217
H3S28ph	-0.477	0.6834	-17.549	0.441	0.783	0.9542	0.217
NR1D1	-2.137	0.9837	-1.522	0.413	0.786	0.9556	0.214
CHD2	-0.868	0.8072	-3.6	0.404	0.786	0.9556	0.214
TRIM33	-2.183	0.9855	-0.759	0.375	0.786	0.956	0.214
IKZF3	-0.407	0.6581	-5.686	0.404	0.788	0.9574	0.212
STAT5	-1.492	0.9322	-4.676	0.454	0.79	0.9581	0.21
CBX3	-0.554	0.7102	-4.681	0.395	0.793	0.9598	0.207
SALL1	-1.726	0.9578	-0.571	0.162	0.793	0.9598	0.207
NFATC2	-1.303	0.9037	-1.452	0.32	0.794	0.9605	0.206
RORA	-1.68	0.9535	-1.708	0.397	0.796	0.9615	0.204
AFF3	-1.253	0.8949	-1.644	0.327	0.796	0.9618	0.204
USF2	-0.95	0.8291	-3.897	0.396	0.8	0.9638	0.2
PPARG	-10.933	1	-2.526	0.462	0.8	0.9641	0.2
LYL1	-1.987	0.9766	-1.248	0.375	0.8	0.9641	0.2
MITF	-0.696	0.7568	-4.082	0.385	0.8	0.9641	0.2
PRDM4	-1.463	0.9283	-1.161	0.295	0.801	0.9647	0.199
RELA	-9.649	1	-2.586	0.462	0.803	0.9656	0.197
KMT2A	-0.996	0.8403	-3.781	0.391	0.804	0.966	0.196
TCF7	-0.964	0.8325	-5.564	0.417	0.804	0.9663	0.196
IRF1	-5.136	1	-1.595	0.418	0.808	0.968	0.192
HOXB4	-1.088	0.8618	-3.788	0.394	0.808	0.968	0.192
ZMIZ1	-1.087	0.8615	-4.619	0.4	0.813	0.9706	0.187
TRIM63	-1.237	0.892	-3.192	0.378	0.814	0.9711	0.186
CHD1	-0.931	0.824	-5.465	0.401	0.815	0.9714	0.185
STAT6	-5.472	1	-1.643	0.417	0.815	0.9717	0.185
SPIB	-1.581	0.943	-1.983	0.369	0.816	0.9719	0.184
BRDT	-0.384	0.6496	-30.317	0.406	0.816	0.9719	0.184
FOXP3	-2.989	0.9986	-4.242	0.456	0.818	0.9727	0.182
ATF3	-2.557	0.9947	-2.075	0.412	0.818	0.9727	0.182
NR0B1	-2.312	0.9896	-0.76	0.261	0.818	0.973	0.182
LEF1	-0.572	0.7164	-20.112	0.408	0.822	0.9748	0.178
SMAD1-SMAD5	-2.232	0.9872	-0.934	0.282	0.822	0.9748	0.178
NFE2L2	-2.03	0.9788	-2.989	0.409	0.825	0.9758	0.175
MAFF	-1.437	0.9246	-2.006	0.301	0.827	0.9767	0.173
ERCC3	-1.19	0.8829	-3.31	0.336	0.829	0.9774	0.171
NR5A1	-1.26	0.8962	-2.834	0.326	0.829	0.9776	0.171
XBP1	-1.584	0.9434	-3.741	0.404	0.832	0.9786	0.168
OGT	-1.269	0.8978	-8.188	0.424	0.832	0.9786	0.168
PAXIP1	-1.446	0.9259	-2.602	0.354	0.832	0.9788	0.168
MAFB	-2.133	0.9835	-1.861	0.359	0.835	0.9799	0.165
GTF2E2	-1.319	0.9064	-16.333	0.437	0.835	0.9799	0.165
LEO1	-1.699	0.9554	-1.634	0.211	0.837	0.9805	0.163
CHD8	-1.115	0.8676	-4.915	0.378	0.839	0.9811	0.161
KAT2B	-1.403	0.9197	-10.529	0.428	0.84	0.9817	0.16
CDK8	-1.559	0.9405	-2.918	0.359	0.84	0.9817	0.16
ETS1	-2.515	0.994	-6.256	0.452	0.842	0.9821	0.158
HOXA9	-1.985	0.9764	-1.754	0.308	0.842	0.9823	0.158
IRF8	-6.172	1	-1.157	0.339	0.845	0.9831	0.155
SOX4	-0.697	0.7572	-14.537	0.385	0.847	0.984	0.153
DAXX	-2.283	0.9888	-2.273	0.363	0.847	0.984	0.153
FLI1	-4.278	1	-6.632	0.46	0.848	0.9842	0.152
GRIP1	-2.292	0.9891	-1.601	0.267	0.849	0.9844	0.151
ASXL1	-0.691	0.7552	-36.899	0.386	0.85	0.9849	0.15
TAF2	-1.354	0.9121	-3.71	0.313	0.853	0.9858	0.147
BRD9	-1.873	0.9694	-3.493	0.366	0.858	0.9871	0.142
FOXO1	-1.444	0.9257	-8.14	0.406	0.86	0.9877	0.14
TAF10	-1.605	0.9457	-2.663	0.264	0.863	0.9883	0.137
IRF3	-2.64	0.9959	-2.483	0.369	0.863	0.9885	0.137
CEBPD	-3.179	0.9993	-1.686	0.302	0.865	0.9889	0.135
SAP18	-1.495	0.9325	-3.865	0.291	0.874	0.9909	0.126
AURKB	-1.63	0.9485	-3.412	0.256	0.876	0.9913	0.124
PRDM16	-2.432	0.9925	-5.533	0.407	0.877	0.9917	0.123
TP53	-5.31	1	-7.579	0.438	0.878	0.9919	0.122
NFE2	-2.535	0.9944	-2.776	0.315	0.88	0.9923	0.12
NR1H3	-3.256	0.9994	-2.388	0.309	0.882	0.9926	0.118
KDM3A	-1.27	0.898	-6.772	0.325	0.883	0.9928	0.117
ESR2	-2.37	0.9911	-3.697	0.347	0.884	0.993	0.116
RUNX3	-3.077	0.999	-3.262	0.351	0.885	0.9931	0.115
MLLT3	-2.405	0.9919	-4.512	0.383	0.885	0.9931	0.115
ETV2	-1.592	0.9443	-4.459	0.267	0.888	0.9937	0.112
CEBPE	-2.336	0.9903	-3.177	0.264	0.89	0.9939	0.11
POLR3A	-1.254	0.895	-11.744	0.327	0.892	0.9943	0.108
TAF12	-1.994	0.9769	-4.866	0.35	0.892	0.9944	0.108
NRDC	-1.34	0.9098	-9.378	0.315	0.894	0.9946	0.106
CTR9	-1.564	0.9411	-5.528	0.276	0.898	0.9952	0.102
TNFSF11	-1.454	0.9271	-12.984	0.355	0.901	0.9957	0.099
ELF1	-2.104	0.9823	-6.548	0.345	0.912	0.997	0.088
ELF4	-2.818	0.9976	-4.48	0.315	0.913	0.9971	0.087
IRF7	-1.386	0.9171	-51.069	0.309	0.914	0.9971	0.086
PARP14	-2.541	0.9945	-15.254	0.346	0.943	0.9992	0.057
