# Supplementary material for: Dnmt3a knockout in excitatory neurons impairs postnatal synapse maturation and increases the repressive histone modification H3K27me3
Source: eLife. 2022 May 23;11:e66909. doi: 10.7554/eLife.66909 (PMC9170249; doi:10.7554/eLife.66909)
Supplement: Supplementary file 7. [file elife-66909-supp7.xlsx]

## Sheet: Readme
Supplementary File 7. List of up-regulated H3K27me3 signal regions in P39 Dnmt3a cKO.
Differential histone signal analysis were performed using DiffBind. See the "Methods" section for detailed parameters.
The table was imported from a BED6 file, in which the coordinates are from the mm10 genome and 0-based.
The "name" field contains the following information of each regions in order, separated by the pipe symbol ("|"): unique region id, the H3K27me3 signal (log2 mean reads count) in the Dnmt3a cKO sample in the region, the H3K27me3 signal (log2 mean reads count) in the control sample in the region, log2 fold difference between cKO and control.
The "score" field is a placeholder to fulfill the requirement of the BED6 format and hence contains no specific infromation about the regions. And the "strand" field is filled with all "." signs to indicate no strand information for the regions.

## Sheet: up-regulated H3K27me3 regions
chrom	start	end	name	score	strand
chr2	116315200	116327399	DM_H3K27me3_cKO_DEseq2_up_2|7.08|4.12|2.96	0	.
chr8	23411800	23434199	DM_H3K27me3_cKO_DEseq2_up_3|8.56|6.97|1.59	0	.
chr4	149046400	149072399	DM_H3K27me3_cKO_DEseq2_up_4|8.07|6.39|1.68	0	.
chr2	29841000	29850199	DM_H3K27me3_cKO_DEseq2_up_5|6.8|4.41|2.39	0	.
chr16	44658800	44680999	DM_H3K27me3_cKO_DEseq2_up_6|8.23|6.62|1.62	0	.
chr1	89695200	89704999	DM_H3K27me3_cKO_DEseq2_up_7|6.39|3.69|2.7	0	.
chr1	57935400	57945399	DM_H3K27me3_cKO_DEseq2_up_8|6.22|2.98|3.24	0	.
chr2	18044200	18056599	DM_H3K27me3_cKO_DEseq2_up_9|7.01|4.94|2.07	0	.
chr7	35687800	35696799	DM_H3K27me3_cKO_DEseq2_up_10|6.41|3.89|2.52	0	.
chr12	3009600	3014999	DM_H3K27me3_cKO_DEseq2_up_11|6.17|3.31|2.86	0	.
chr5	64802200	64810799	DM_H3K27me3_cKO_DEseq2_up_12|6.5|4.16|2.35	0	.
chr11	4601000	4608199	DM_H3K27me3_cKO_DEseq2_up_13|6.06|2.88|3.17	0	.
chr3	35330000	35345799	DM_H3K27me3_cKO_DEseq2_up_14|7.67|6.19|1.48	0	.
chr8	87732800	87750199	DM_H3K27me3_cKO_DEseq2_up_15|8.02|6.53|1.48	0	.
chr11	112975000	112987199	DM_H3K27me3_cKO_DEseq2_up_16|7.18|5.49|1.69	0	.
chr11	101163400	101170999	DM_H3K27me3_cKO_DEseq2_up_17|6.73|4.79|1.94	0	.
chr8	87714400	87729599	DM_H3K27me3_cKO_DEseq2_up_18|7.53|5.86|1.67	0	.
chr13	94536400	94546599	DM_H3K27me3_cKO_DEseq2_up_19|6.78|4.86|1.92	0	.
chr6	72676800	72682999	DM_H3K27me3_cKO_DEseq2_up_20|6.24|3.8|2.45	0	.
chr8	48135200	48147799	DM_H3K27me3_cKO_DEseq2_up_21|7.09|5.34|1.75	0	.
chr19	6924800	6929399	DM_H3K27me3_cKO_DEseq2_up_22|5.94|3.15|2.78	0	.
chr11	88531600	88546399	DM_H3K27me3_cKO_DEseq2_up_23|7|5.16|1.84	0	.
chr3	34572400	34577999	DM_H3K27me3_cKO_DEseq2_up_24|6.43|4.31|2.12	0	.
chr11	88683400	88695399	DM_H3K27me3_cKO_DEseq2_up_25|6.83|4.96|1.87	0	.
chr3	86534200	86557999	DM_H3K27me3_cKO_DEseq2_up_26|8.27|7|1.27	0	.
chr11	113497600	113509599	DM_H3K27me3_cKO_DEseq2_up_27|6.74|4.84|1.9	0	.
chr9	69258800	69267799	DM_H3K27me3_cKO_DEseq2_up_28|6.28|4.03|2.25	0	.
chr2	115655800	115662799	DM_H3K27me3_cKO_DEseq2_up_29|6.19|3.89|2.29	0	.
chr4	150822400	150829599	DM_H3K27me3_cKO_DEseq2_up_30|6.21|3.84|2.37	0	.
chr6	99200200	99206799	DM_H3K27me3_cKO_DEseq2_up_31|6.26|3.98|2.27	0	.
chr2	178979000	178985999	DM_H3K27me3_cKO_DEseq2_up_32|6.36|4.19|2.17	0	.
chr17	84176400	84183999	DM_H3K27me3_cKO_DEseq2_up_33|6.32|4.2|2.13	0	.
chr9	84067600	84072599	DM_H3K27me3_cKO_DEseq2_up_34|5.91|3.23|2.68	0	.
chr18	43506600	43510999	DM_H3K27me3_cKO_DEseq2_up_35|5.5|1.3|4.2	0	.
chr18	76091200	76100999	DM_H3K27me3_cKO_DEseq2_up_36|6.24|3.94|2.29	0	.
chr12	99282600	99290999	DM_H3K27me3_cKO_DEseq2_up_37|6.49|4.51|1.98	0	.
chr12	108760600	108766799	DM_H3K27me3_cKO_DEseq2_up_38|5.76|2.79|2.97	0	.
chr10	9061400	9068599	DM_H3K27me3_cKO_DEseq2_up_39|5.93|3.31|2.61	0	.
chr9	32464400	32470999	DM_H3K27me3_cKO_DEseq2_up_40|6.08|3.63|2.45	0	.
chr2	27677800	27686199	DM_H3K27me3_cKO_DEseq2_up_41|6.31|4.12|2.2	0	.
chr13	53258000	53269599	DM_H3K27me3_cKO_DEseq2_up_42|6.93|5.19|1.74	0	.
chr10	42317200	42329599	DM_H3K27me3_cKO_DEseq2_up_43|6.83|5.11|1.72	0	.
chr2	179480800	179486799	DM_H3K27me3_cKO_DEseq2_up_44|6.2|3.98|2.22	0	.
chr4	148413800	148420799	DM_H3K27me3_cKO_DEseq2_up_45|6.26|4.03|2.23	0	.
chr17	80005600	80015199	DM_H3K27me3_cKO_DEseq2_up_46|6.56|4.66|1.91	0	.
chr16	94177000	94184599	DM_H3K27me3_cKO_DEseq2_up_47|6.84|5|1.84	0	.
chr8	92133200	92136599	DM_H3K27me3_cKO_DEseq2_up_48|5.66|2.69|2.97	0	.
chr7	130010200	130019399	DM_H3K27me3_cKO_DEseq2_up_49|6.41|4.2|2.21	0	.
chr8	87826600	87836799	DM_H3K27me3_cKO_DEseq2_up_50|7.03|5.46|1.57	0	.
chr18	62834200	62840599	DM_H3K27me3_cKO_DEseq2_up_51|5.87|3.24|2.64	0	.
chr15	12938800	12943199	DM_H3K27me3_cKO_DEseq2_up_52|5.96|3.51|2.45	0	.
chr11	89714400	89726599	DM_H3K27me3_cKO_DEseq2_up_53|6.87|5.12|1.75	0	.
chr1	89668800	89672199	DM_H3K27me3_cKO_DEseq2_up_54|5.43|1.32|4.12	0	.
chr19	55604600	55610399	DM_H3K27me3_cKO_DEseq2_up_55|5.52|2.16|3.36	0	.
chr15	8659000	8674399	DM_H3K27me3_cKO_DEseq2_up_56|7.63|6.24|1.39	0	.
chr1	126073400	126080999	DM_H3K27me3_cKO_DEseq2_up_57|6.06|3.79|2.26	0	.
chr14	51098200	51103599	DM_H3K27me3_cKO_DEseq2_up_58|5.55|2.31|3.23	0	.
chr6	127492800	127497599	DM_H3K27me3_cKO_DEseq2_up_59|5.44|1.56|3.88	0	.
chr6	15395200	15422399	DM_H3K27me3_cKO_DEseq2_up_60|8.32|7.13|1.19	0	.
chr4	151654200	151663599	DM_H3K27me3_cKO_DEseq2_up_61|6.7|5.03|1.67	0	.
chr8	113766800	113771999	DM_H3K27me3_cKO_DEseq2_up_62|5.43|1.98|3.45	0	.
chr11	113180400	113187599	DM_H3K27me3_cKO_DEseq2_up_63|5.83|3.16|2.66	0	.
chr8	119254600	119259599	DM_H3K27me3_cKO_DEseq2_up_64|5.46|1.78|3.68	0	.
chr18	82901000	82910399	DM_H3K27me3_cKO_DEseq2_up_65|6.74|5.05|1.69	0	.
chr11	8565400	8576799	DM_H3K27me3_cKO_DEseq2_up_66|6.75|5.09|1.66	0	.
chr11	68142000	68150399	DM_H3K27me3_cKO_DEseq2_up_67|6.73|5.09|1.63	0	.
chr15	7218200	7230599	DM_H3K27me3_cKO_DEseq2_up_68|6.91|5.36|1.55	0	.
chr4	154453600	154533999	DM_H3K27me3_cKO_DEseq2_up_69|10.08|8.98|1.1	0	.
chr10	79999000	80003399	DM_H3K27me3_cKO_DEseq2_up_70|5.46|2.16|3.3	0	.
chr1	59469400	59488199	DM_H3K27me3_cKO_DEseq2_up_71|7.92|6.76|1.16	0	.
chr11	36283800	36289199	DM_H3K27me3_cKO_DEseq2_up_72|5.34|1.79|3.55	0	.
chr7	133068600	133075399	DM_H3K27me3_cKO_DEseq2_up_73|6.34|4.44|1.89	0	.
chr10	120841800	120845999	DM_H3K27me3_cKO_DEseq2_up_74|5.44|2.31|3.13	0	.
chr6	95599600	95607399	DM_H3K27me3_cKO_DEseq2_up_75|5.88|3.57|2.32	0	.
chr11	10613800	10623799	DM_H3K27me3_cKO_DEseq2_up_76|6.18|4.19|1.98	0	.
chr8	87781000	87788599	DM_H3K27me3_cKO_DEseq2_up_77|6.45|4.54|1.9	0	.
chr2	166384600	166388999	DM_H3K27me3_cKO_DEseq2_up_78|5.54|2.68|2.85	0	.
chr12	71475200	71482199	DM_H3K27me3_cKO_DEseq2_up_79|6.18|4.2|1.98	0	.
chr3	51900400	51904999	DM_H3K27me3_cKO_DEseq2_up_80|5.26|1.3|3.96	0	.
chr6	54328600	54340199	DM_H3K27me3_cKO_DEseq2_up_81|6.89|5.27|1.62	0	.
chr6	42249000	42255599	DM_H3K27me3_cKO_DEseq2_up_82|5.64|2.99|2.66	0	.
chr7	39838000	39843199	DM_H3K27me3_cKO_DEseq2_up_83|5.38|1.98|3.4	0	.
chr14	30019800	30025999	DM_H3K27me3_cKO_DEseq2_up_84|5.52|2.32|3.21	0	.
chr2	57373800	57381399	DM_H3K27me3_cKO_DEseq2_up_85|6.31|4.41|1.89	0	.
chr19	37676600	37708999	DM_H3K27me3_cKO_DEseq2_up_86|8.92|7.83|1.09	0	.
chr2	33912000	33927999	DM_H3K27me3_cKO_DEseq2_up_87|7.34|5.97|1.37	0	.
chr13	15534800	15557199	DM_H3K27me3_cKO_DEseq2_up_88|8.43|7.32|1.11	0	.
chr7	133586200	133596799	DM_H3K27me3_cKO_DEseq2_up_89|6.8|5.25|1.55	0	.
chr10	45302800	45315599	DM_H3K27me3_cKO_DEseq2_up_90|6.98|5.45|1.53	0	.
chr1	184188000	184196999	DM_H3K27me3_cKO_DEseq2_up_91|6.46|4.71|1.75	0	.
chr5	111161400	111165399	DM_H3K27me3_cKO_DEseq2_up_92|5.45|2.31|3.15	0	.
chr11	114106000	114112199	DM_H3K27me3_cKO_DEseq2_up_93|5.9|3.69|2.21	0	.
chr6	51841800	51848599	DM_H3K27me3_cKO_DEseq2_up_94|6.12|4.11|2.01	0	.
chr18	53633400	53643199	DM_H3K27me3_cKO_DEseq2_up_95|6.64|5.01|1.63	0	.
chr4	41624400	41637799	DM_H3K27me3_cKO_DEseq2_up_96|6.75|5.12|1.64	0	.
chr11	84566200	84583599	DM_H3K27me3_cKO_DEseq2_up_97|7.71|6.53|1.19	0	.
chr6	137326600	137330199	DM_H3K27me3_cKO_DEseq2_up_98|5.34|-0.01|5.35	0	.
chr10	22296200	22306199	DM_H3K27me3_cKO_DEseq2_up_99|6.2|4.23|1.96	0	.
chr7	43184000	43206199	DM_H3K27me3_cKO_DEseq2_up_100|7.97|6.86|1.11	0	.
chr7	144821400	144825199	DM_H3K27me3_cKO_DEseq2_up_101|5.41|2.31|3.1	0	.
chr18	58016800	58021199	DM_H3K27me3_cKO_DEseq2_up_102|5.31|1.78|3.53	0	.
chr2	75455800	75464999	DM_H3K27me3_cKO_DEseq2_up_103|6.35|4.48|1.87	0	.
chr5	30440800	30452999	DM_H3K27me3_cKO_DEseq2_up_104|6.56|4.85|1.71	0	.
chr13	15610000	15630199	DM_H3K27me3_cKO_DEseq2_up_105|8.21|7.09|1.11	0	.
chr3	9105800	9111999	DM_H3K27me3_cKO_DEseq2_up_106|5.89|3.57|2.32	0	.
chr12	33100400	33113999	DM_H3K27me3_cKO_DEseq2_up_107|7.07|5.58|1.49	0	.
chr9	72861400	72868399	DM_H3K27me3_cKO_DEseq2_up_108|5.86|3.51|2.35	0	.
chr1	185541400	185546799	DM_H3K27me3_cKO_DEseq2_up_109|5.6|2.98|2.62	0	.
chr5	64441400	64445799	DM_H3K27me3_cKO_DEseq2_up_110|5.31|1.78|3.52	0	.
chr9	63954600	63992199	DM_H3K27me3_cKO_DEseq2_up_111|8.69|7.65|1.05	0	.
chr5	99833200	99839199	DM_H3K27me3_cKO_DEseq2_up_112|5.96|3.89|2.07	0	.
chr12	105866400	105872599	DM_H3K27me3_cKO_DEseq2_up_113|5.8|3.51|2.29	0	.
chr3	34555200	34568199	DM_H3K27me3_cKO_DEseq2_up_114|7.3|5.96|1.34	0	.
chr14	60632800	60655199	DM_H3K27me3_cKO_DEseq2_up_115|8.02|6.88|1.14	0	.
chr17	74866200	74876199	DM_H3K27me3_cKO_DEseq2_up_116|6.39|4.63|1.76	0	.
chr17	50214800	50222799	DM_H3K27me3_cKO_DEseq2_up_117|6.23|4.3|1.93	0	.
chr11	113268000	113280199	DM_H3K27me3_cKO_DEseq2_up_118|7.05|5.66|1.39	0	.
chr2	18023000	18035599	DM_H3K27me3_cKO_DEseq2_up_119|7.37|4.77|2.6	0	.
chr3	52557600	52564599	DM_H3K27me3_cKO_DEseq2_up_120|5.93|3.79|2.13	0	.
chr6	131530800	131539799	DM_H3K27me3_cKO_DEseq2_up_121|6.09|4.11|1.98	0	.
chr12	53564200	53570599	DM_H3K27me3_cKO_DEseq2_up_122|6.02|4.03|1.99	0	.
chr3	5386400	5389999	DM_H3K27me3_cKO_DEseq2_up_123|5.16|0.98|4.18	0	.
chr4	105233400	105247799	DM_H3K27me3_cKO_DEseq2_up_124|7.11|5.67|1.44	0	.
chr12	118701400	118704399	DM_H3K27me3_cKO_DEseq2_up_125|5.4|2.32|3.09	0	.
chr19	59126400	59140799	DM_H3K27me3_cKO_DEseq2_up_126|7.64|6.42|1.22	0	.
chr10	3523400	3535399	DM_H3K27me3_cKO_DEseq2_up_127|6.77|5.23|1.53	0	.
chr6	67026000	67032599	DM_H3K27me3_cKO_DEseq2_up_128|5.93|3.84|2.08	0	.
chr6	125444600	125458999	DM_H3K27me3_cKO_DEseq2_up_129|7.03|5.6|1.43	0	.
chr4	97947400	97957199	DM_H3K27me3_cKO_DEseq2_up_130|6.65|5.03|1.61	0	.
chr4	140649400	140663199	DM_H3K27me3_cKO_DEseq2_up_131|7.17|5.75|1.41	0	.
chr5	147638800	147643599	DM_H3K27me3_cKO_DEseq2_up_132|5.59|3.08|2.51	0	.
chr10	23156600	23167199	DM_H3K27me3_cKO_DEseq2_up_133|6.78|5.31|1.48	0	.
chr17	10357400	10364599	DM_H3K27me3_cKO_DEseq2_up_134|5.92|3.79|2.13	0	.
chr1	178592400	178597399	DM_H3K27me3_cKO_DEseq2_up_135|5.31|2.15|3.15	0	.
chr1	161394000	161403199	DM_H3K27me3_cKO_DEseq2_up_136|6.45|4.59|1.85	0	.
chr17	64547000	64552399	DM_H3K27me3_cKO_DEseq2_up_137|5.58|3.08|2.5	0	.
chr17	57064200	57069599	DM_H3K27me3_cKO_DEseq2_up_138|5.57|3.07|2.5	0	.
chr5	116910200	116925599	DM_H3K27me3_cKO_DEseq2_up_139|7.58|6.37|1.21	0	.
chr7	85500400	85505199	DM_H3K27me3_cKO_DEseq2_up_140|5.21|-0.01|5.23	0	.
chr12	107969000	107974599	DM_H3K27me3_cKO_DEseq2_up_141|5.71|3.31|2.39	0	.
chr6	137013000	137016999	DM_H3K27me3_cKO_DEseq2_up_142|5.2|1.32|3.89	0	.
chr15	97591600	97602399	DM_H3K27me3_cKO_DEseq2_up_143|6.56|4.86|1.7	0	.
chr2	139023600	139027799	DM_H3K27me3_cKO_DEseq2_up_144|5.2|-0.01|5.21	0	.
chr2	79779000	79786599	DM_H3K27me3_cKO_DEseq2_up_145|6.27|4.48|1.79	0	.
chr3	146307600	146327199	DM_H3K27me3_cKO_DEseq2_up_146|7.6|6.42|1.18	0	.
chr1	60999000	61006999	DM_H3K27me3_cKO_DEseq2_up_147|5.78|3.38|2.4	0	.
chr1	72377400	72383999	DM_H3K27me3_cKO_DEseq2_up_148|5.9|3.74|2.17	0	.
chr6	97351200	97361799	DM_H3K27me3_cKO_DEseq2_up_149|7.3|5.93|1.37	0	.
chr11	113281400	113286199	DM_H3K27me3_cKO_DEseq2_up_150|5.73|3.23|2.5	0	.
chr18	74320600	74326199	DM_H3K27me3_cKO_DEseq2_up_151|5.64|3.24|2.4	0	.
chr9	60458400	60462399	DM_H3K27me3_cKO_DEseq2_up_152|5.1|0.99|4.11	0	.
chr4	32916000	32925399	DM_H3K27me3_cKO_DEseq2_up_153|6.54|4.89|1.66	0	.
chr11	11825800	11849199	DM_H3K27me3_cKO_DEseq2_up_154|7.92|6.69|1.23	0	.
chr6	50687400	50694599	DM_H3K27me3_cKO_DEseq2_up_155|6.08|4.19|1.88	0	.
chr7	65905400	65917399	DM_H3K27me3_cKO_DEseq2_up_156|6.98|5.61|1.37	0	.
chr9	72805800	72814999	DM_H3K27me3_cKO_DEseq2_up_157|6.96|5.56|1.41	0	.
chr6	128067800	128072199	DM_H3K27me3_cKO_DEseq2_up_158|5.11|0.99|4.12	0	.
chr5	131398600	131405999	DM_H3K27me3_cKO_DEseq2_up_159|6|4.03|1.97	0	.
chr12	41151800	41157399	DM_H3K27me3_cKO_DEseq2_up_160|5.62|3.23|2.39	0	.
chr14	47361200	47367199	DM_H3K27me3_cKO_DEseq2_up_161|5.97|3.94|2.03	0	.
chr4	151583200	151592599	DM_H3K27me3_cKO_DEseq2_up_162|6.35|4.66|1.69	0	.
chr2	93464600	93483799	DM_H3K27me3_cKO_DEseq2_up_163|7.53|6.33|1.2	0	.
chr14	61694600	61708599	DM_H3K27me3_cKO_DEseq2_up_164|7.37|6.17|1.2	0	.
chr16	90458200	90465799	DM_H3K27me3_cKO_DEseq2_up_165|6.27|4.51|1.76	0	.
chr9	102711400	102726599	DM_H3K27me3_cKO_DEseq2_up_166|7.45|6.25|1.2	0	.
chr5	112160000	112171199	DM_H3K27me3_cKO_DEseq2_up_167|7.06|5.73|1.33	0	.
chr18	57482200	57489599	DM_H3K27me3_cKO_DEseq2_up_168|6.43|4.79|1.64	0	.
chr16	78396200	78399799	DM_H3K27me3_cKO_DEseq2_up_169|5.28|1.97|3.3	0	.
chr9	115772200	115782399	DM_H3K27me3_cKO_DEseq2_up_170|6.26|4.44|1.82	0	.
chr6	48431000	48442199	DM_H3K27me3_cKO_DEseq2_up_171|7.12|5.82|1.3	0	.
chr13	59968400	59977799	DM_H3K27me3_cKO_DEseq2_up_172|7.04|5.67|1.37	0	.
chr9	51147000	51152199	DM_H3K27me3_cKO_DEseq2_up_173|5.18|1.56|3.62	0	.
chr10	65709400	65714199	DM_H3K27me3_cKO_DEseq2_up_174|5.16|1.56|3.6	0	.
chr17	29969200	29974799	DM_H3K27me3_cKO_DEseq2_up_175|5.37|2.45|2.93	0	.
chr13	45419400	45432599	DM_H3K27me3_cKO_DEseq2_up_176|7.11|5.79|1.31	0	.
chr2	31492400	31496199	DM_H3K27me3_cKO_DEseq2_up_177|5.12|0.58|4.54	0	.
chr1	50203000	50208399	DM_H3K27me3_cKO_DEseq2_up_178|5.47|2.79|2.69	0	.
chr7	131704800	131710999	DM_H3K27me3_cKO_DEseq2_up_179|5.69|3.44|2.24	0	.
chr2	21358600	21363799	DM_H3K27me3_cKO_DEseq2_up_180|5.43|2.79|2.64	0	.
chr10	24864400	24868399	DM_H3K27me3_cKO_DEseq2_up_181|5.14|1.58|3.56	0	.
chr2	113651600	113659199	DM_H3K27me3_cKO_DEseq2_up_182|5.97|4.03|1.94	0	.
chr16	18718200	18724599	DM_H3K27me3_cKO_DEseq2_up_183|5.98|3.98|2	0	.
chr5	103586400	103592599	DM_H3K27me3_cKO_DEseq2_up_184|5.83|3.69|2.14	0	.
chr7	131671000	131674999	DM_H3K27me3_cKO_DEseq2_up_185|5.39|2.68|2.7	0	.
chr1	165845400	165857399	DM_H3K27me3_cKO_DEseq2_up_186|6.82|5.38|1.44	0	.
chr11	35079400	35087799	DM_H3K27me3_cKO_DEseq2_up_187|6.29|4.42|1.88	0	.
chr8	36011000	36017399	DM_H3K27me3_cKO_DEseq2_up_188|5.82|3.74|2.08	0	.
chr10	41057400	41061399	DM_H3K27me3_cKO_DEseq2_up_189|5.08|1.3|3.78	0	.
chr2	115509200	115523999	DM_H3K27me3_cKO_DEseq2_up_190|7.49|6.33|1.16	0	.
chr7	126353200	126356599	DM_H3K27me3_cKO_DEseq2_up_191|5.41|2.69|2.72	0	.
chr8	119457000	119462399	DM_H3K27me3_cKO_DEseq2_up_192|5.63|3.15|2.48	0	.
chr14	48125200	48141199	DM_H3K27me3_cKO_DEseq2_up_193|7.58|6.44|1.14	0	.
chr17	67038800	67045199	DM_H3K27me3_cKO_DEseq2_up_194|6.06|4.19|1.86	0	.
chr10	9034600	9040999	DM_H3K27me3_cKO_DEseq2_up_195|5.91|3.94|1.97	0	.
chr9	95665800	95669799	DM_H3K27me3_cKO_DEseq2_up_196|5.37|2.68|2.69	0	.
chr9	78015600	78027599	DM_H3K27me3_cKO_DEseq2_up_197|6.83|5.41|1.41	0	.
chr13	56064400	56071199	DM_H3K27me3_cKO_DEseq2_up_198|6.02|4.07|1.95	0	.
chr9	42501800	42509399	DM_H3K27me3_cKO_DEseq2_up_199|6.3|4.6|1.7	0	.
chr4	130982600	130987599	DM_H3K27me3_cKO_DEseq2_up_200|5.75|3.57|2.18	0	.
chr12	106075200	106084399	DM_H3K27me3_cKO_DEseq2_up_201|6.56|5.01|1.55	0	.
chr3	35082200	35091199	DM_H3K27me3_cKO_DEseq2_up_202|6.77|5.33|1.44	0	.
chr16	90833200	90858199	DM_H3K27me3_cKO_DEseq2_up_203|8.15|7.07|1.08	0	.
chr13	60117400	60136399	DM_H3K27me3_cKO_DEseq2_up_204|8.13|7.12|1.01	0	.
chr6	95161000	95173599	DM_H3K27me3_cKO_DEseq2_up_205|6.84|5.3|1.53	0	.
chr11	63748200	63762199	DM_H3K27me3_cKO_DEseq2_up_206|7.11|5.84|1.26	0	.
chr1	76714800	76720599	DM_H3K27me3_cKO_DEseq2_up_207|5.62|3.08|2.54	0	.
chr8	96654200	96658999	DM_H3K27me3_cKO_DEseq2_up_208|5.38|2.57|2.81	0	.
chr5	3448800	3462999	DM_H3K27me3_cKO_DEseq2_up_209|7.2|5.85|1.36	0	.
chr5	103418200	103422999	DM_H3K27me3_cKO_DEseq2_up_210|5.48|2.99|2.49	0	.
chr6	136732200	136737399	DM_H3K27me3_cKO_DEseq2_up_211|5.45|2.9|2.55	0	.
chr10	42687400	42690599	DM_H3K27me3_cKO_DEseq2_up_212|5.07|-0.01|5.08	0	.
chr19	3432800	3444399	DM_H3K27me3_cKO_DEseq2_up_213|6.78|5.33|1.45	0	.
chr11	64205000	64216999	DM_H3K27me3_cKO_DEseq2_up_214|6.59|5.05|1.53	0	.
chr8	69354000	69357799	DM_H3K27me3_cKO_DEseq2_up_215|5.07|1.57|3.5	0	.
chr11	88505400	88519599	DM_H3K27me3_cKO_DEseq2_up_216|7.22|5.96|1.26	0	.
chr9	61161800	61169399	DM_H3K27me3_cKO_DEseq2_up_217|5.98|4.11|1.87	0	.
chr16	94145000	94153999	DM_H3K27me3_cKO_DEseq2_up_218|6.53|4.85|1.68	0	.
chr2	72489800	72525399	DM_H3K27me3_cKO_DEseq2_up_219|8.64|7.62|1.02	0	.
chr12	119504000	119508799	DM_H3K27me3_cKO_DEseq2_up_220|5.39|2.79|2.6	0	.
chr2	59541600	59546999	DM_H3K27me3_cKO_DEseq2_up_221|6.12|4.34|1.78	0	.
chr7	34407200	34411599	DM_H3K27me3_cKO_DEseq2_up_222|5.82|3.74|2.08	0	.
chr11	82644400	82655199	DM_H3K27me3_cKO_DEseq2_up_223|6.9|5.57|1.33	0	.
chr1	151847600	151854199	DM_H3K27me3_cKO_DEseq2_up_224|5.59|3.23|2.36	0	.
chr6	49653800	49659599	DM_H3K27me3_cKO_DEseq2_up_225|5.93|3.9|2.03	0	.
chr2	71606800	71610999	DM_H3K27me3_cKO_DEseq2_up_226|5.37|2.68|2.69	0	.
chr9	35408000	35420199	DM_H3K27me3_cKO_DEseq2_up_227|7|5.49|1.51	0	.
chr5	116641800	116653799	DM_H3K27me3_cKO_DEseq2_up_228|6.93|5.54|1.38	0	.
chr5	143285600	143289599	DM_H3K27me3_cKO_DEseq2_up_229|5.06|-0.01|5.08	0	.
chr7	29391000	29395399	DM_H3K27me3_cKO_DEseq2_up_230|5.21|1.8|3.41	0	.
chr8	87149000	87161199	DM_H3K27me3_cKO_DEseq2_up_231|6.94|5.66|1.28	0	.
chr4	11122600	11127399	DM_H3K27me3_cKO_DEseq2_up_232|5.36|2.69|2.67	0	.
chr13	98426400	98432399	DM_H3K27me3_cKO_DEseq2_up_233|6.51|4.96|1.54	0	.
chr15	80070200	80073999	DM_H3K27me3_cKO_DEseq2_up_234|5|0.98|4.02	0	.
chr10	22329400	22336799	DM_H3K27me3_cKO_DEseq2_up_235|6.04|4.23|1.8	0	.
chr12	107975400	107985999	DM_H3K27me3_cKO_DEseq2_up_236|6.86|5.53|1.34	0	.
chr3	149087600	149092999	DM_H3K27me3_cKO_DEseq2_up_237|5.78|3.63|2.15	0	.
chr5	112140400	112147199	DM_H3K27me3_cKO_DEseq2_up_238|5.99|4.15|1.83	0	.
chr10	6140400	6147199	DM_H3K27me3_cKO_DEseq2_up_239|5.65|3.45|2.2	0	.
chr11	33291200	33305999	DM_H3K27me3_cKO_DEseq2_up_240|7.42|6.31|1.11	0	.
chr18	82884600	82895599	DM_H3K27me3_cKO_DEseq2_up_241|6.74|5.18|1.56	0	.
chr6	94540600	94543999	DM_H3K27me3_cKO_DEseq2_up_242|5|1.3|3.69	0	.
chr3	147071600	147106399	DM_H3K27me3_cKO_DEseq2_up_243|8.82|7.8|1.03	0	.
chr6	9397200	9403399	DM_H3K27me3_cKO_DEseq2_up_244|5.63|3.44|2.19	0	.
chr2	105713400	105724599	DM_H3K27me3_cKO_DEseq2_up_245|7.1|5.88|1.22	0	.
chr1	59548200	59556599	DM_H3K27me3_cKO_DEseq2_up_246|6.43|4.84|1.59	0	.
chr13	57071000	57083799	DM_H3K27me3_cKO_DEseq2_up_247|6.61|5.13|1.47	0	.
chr18	84550000	84553799	DM_H3K27me3_cKO_DEseq2_up_248|4.97|0.99|3.98	0	.
chr15	6979200	6987399	DM_H3K27me3_cKO_DEseq2_up_249|6.37|4.66|1.71	0	.
chr13	94573200	94579799	DM_H3K27me3_cKO_DEseq2_up_250|6.11|4.38|1.73	0	.
chr4	107441000	107446199	DM_H3K27me3_cKO_DEseq2_up_251|5.99|4.16|1.84	0	.
chr11	57560800	57577199	DM_H3K27me3_cKO_DEseq2_up_252|7.44|6.35|1.09	0	.
chr2	53829000	53835199	DM_H3K27me3_cKO_DEseq2_up_253|5.42|2.9|2.52	0	.
chr10	118664600	118667999	DM_H3K27me3_cKO_DEseq2_up_254|5|-0.01|5.01	0	.
chr14	79153200	79159399	DM_H3K27me3_cKO_DEseq2_up_255|6.03|4.2|1.83	0	.
chr2	57490800	57500599	DM_H3K27me3_cKO_DEseq2_up_256|6.52|4.81|1.71	0	.
chr12	84684200	84690999	DM_H3K27me3_cKO_DEseq2_up_257|5.88|3.94|1.94	0	.
chr8	48120400	48130799	DM_H3K27me3_cKO_DEseq2_up_258|6.82|5.36|1.46	0	.
chr2	77169600	77176199	DM_H3K27me3_cKO_DEseq2_up_259|5.67|3.51|2.16	0	.
chr8	109466800	109477799	DM_H3K27me3_cKO_DEseq2_up_260|6.99|5.66|1.33	0	.
chr6	143701400	143717999	DM_H3K27me3_cKO_DEseq2_up_261|7.47|6.37|1.1	0	.
chr9	48590600	48598599	DM_H3K27me3_cKO_DEseq2_up_262|6.39|4.84|1.55	0	.
chr2	75797200	75806399	DM_H3K27me3_cKO_DEseq2_up_263|6.38|4.65|1.73	0	.
chr4	45140200	45148999	DM_H3K27me3_cKO_DEseq2_up_264|6.59|5.12|1.47	0	.
chr9	69696400	69707599	DM_H3K27me3_cKO_DEseq2_up_265|6.85|5.49|1.36	0	.
chr9	46231000	46234799	DM_H3K27me3_cKO_DEseq2_up_266|4.98|0.98|4	0	.
chr8	25309600	25317599	DM_H3K27me3_cKO_DEseq2_up_267|6.19|4.48|1.71	0	.
chr8	106399600	106402799	DM_H3K27me3_cKO_DEseq2_up_268|4.99|-0.01|5	0	.
chr15	39216600	39221599	DM_H3K27me3_cKO_DEseq2_up_269|5.61|3.37|2.24	0	.
chr5	75534200	75542199	DM_H3K27me3_cKO_DEseq2_up_270|6.15|4.38|1.77	0	.
chr2	74205400	74219799	DM_H3K27me3_cKO_DEseq2_up_271|7.63|6.55|1.08	0	.
chr8	80026400	80034399	DM_H3K27me3_cKO_DEseq2_up_272|6.07|4.27|1.8	0	.
chr4	139752800	139773999	DM_H3K27me3_cKO_DEseq2_up_273|7.95|6.93|1.02	0	.
chr18	56757800	56766799	DM_H3K27me3_cKO_DEseq2_up_274|6.46|4.96|1.5	0	.
chr1	168472200	168476199	DM_H3K27me3_cKO_DEseq2_up_275|5.23|2.31|2.92	0	.
chr2	168827200	168833999	DM_H3K27me3_cKO_DEseq2_up_276|6.3|4.63|1.67	0	.
chr9	63558200	63572399	DM_H3K27me3_cKO_DEseq2_up_277|7.33|6.21|1.12	0	.
chr16	38781000	38784599	DM_H3K27me3_cKO_DEseq2_up_278|4.98|-0.01|4.99	0	.
chr19	56101000	56107799	DM_H3K27me3_cKO_DEseq2_up_279|5.88|3.85|2.03	0	.
chr2	113487600	113492399	DM_H3K27me3_cKO_DEseq2_up_280|5.29|2.57|2.72	0	.
chr7	133452000	133460799	DM_H3K27me3_cKO_DEseq2_up_281|6.38|4.74|1.64	0	.
chr3	122402600	122409799	DM_H3K27me3_cKO_DEseq2_up_282|6.06|4.27|1.79	0	.
chr6	120187600	120192599	DM_H3K27me3_cKO_DEseq2_up_283|5.79|3.56|2.23	0	.
chr1	103819600	103823199	DM_H3K27me3_cKO_DEseq2_up_284|4.92|0.57|4.35	0	.
chr1	118802200	118807599	DM_H3K27me3_cKO_DEseq2_up_285|5.42|2.98|2.44	0	.
chr5	120508800	120515199	DM_H3K27me3_cKO_DEseq2_up_286|5.82|3.84|1.98	0	.
chr2	38339600	38344199	DM_H3K27me3_cKO_DEseq2_up_287|5.67|3.45|2.22	0	.
chr7	34595000	34601799	DM_H3K27me3_cKO_DEseq2_up_288|6.2|4.57|1.63	0	.
chr18	58842800	58848999	DM_H3K27me3_cKO_DEseq2_up_289|5.68|3.5|2.18	0	.
chr2	170587600	170594199	DM_H3K27me3_cKO_DEseq2_up_290|5.86|3.75|2.11	0	.
chr11	119154800	119161199	DM_H3K27me3_cKO_DEseq2_up_291|6.47|4.96|1.51	0	.
chr1	138495400	138501599	DM_H3K27me3_cKO_DEseq2_up_292|5.84|3.79|2.05	0	.
chr4	41669800	41679999	DM_H3K27me3_cKO_DEseq2_up_293|6.77|5.27|1.49	0	.
chr6	137201600	137204999	DM_H3K27me3_cKO_DEseq2_up_294|4.95|0.98|3.97	0	.
chr6	128041400	128046599	DM_H3K27me3_cKO_DEseq2_up_295|5.46|3.07|2.39	0	.
chr2	115466000	115472999	DM_H3K27me3_cKO_DEseq2_up_296|6.41|4.92|1.5	0	.
chr2	169774000	169782799	DM_H3K27me3_cKO_DEseq2_up_297|6.56|5.05|1.51	0	.
chr10	61036200	61047199	DM_H3K27me3_cKO_DEseq2_up_298|6.69|5.31|1.38	0	.
chr6	137209000	137212999	DM_H3K27me3_cKO_DEseq2_up_299|5.31|2.57|2.74	0	.
chr13	41360600	41363999	DM_H3K27me3_cKO_DEseq2_up_300|5.23|2.44|2.79	0	.
chr2	170544200	170548999	DM_H3K27me3_cKO_DEseq2_up_301|5.62|3.38|2.24	0	.
chr10	87126000	87131399	DM_H3K27me3_cKO_DEseq2_up_302|5.63|3.31|2.31	0	.
chr17	13344200	13349399	DM_H3K27me3_cKO_DEseq2_up_303|5.42|2.98|2.44	0	.
chr6	97697800	97713799	DM_H3K27me3_cKO_DEseq2_up_304|7.21|5.96|1.24	0	.
chr7	98822600	98827199	DM_H3K27me3_cKO_DEseq2_up_305|5.62|3.51|2.11	0	.
chr15	83678000	83682199	DM_H3K27me3_cKO_DEseq2_up_306|5.01|-0.01|5.03	0	.
chr12	106068200	106073999	DM_H3K27me3_cKO_DEseq2_up_307|5.94|4.11|1.83	0	.
chr13	94547400	94550599	DM_H3K27me3_cKO_DEseq2_up_308|4.96|-0.01|4.98	0	.
chr17	13203400	13240599	DM_H3K27me3_cKO_DEseq2_up_309|9.1|8.17|0.93	0	.
chr5	97039800	97043599	DM_H3K27me3_cKO_DEseq2_up_310|4.91|0.99|3.93	0	.
chr13	53233600	53238599	DM_H3K27me3_cKO_DEseq2_up_311|5.86|3.84|2.02	0	.
chr8	118064400	118072399	DM_H3K27me3_cKO_DEseq2_up_312|6.26|4.47|1.79	0	.
chr6	50724400	50732599	DM_H3K27me3_cKO_DEseq2_up_313|6.3|4.74|1.56	0	.
chr4	28548200	28551999	DM_H3K27me3_cKO_DEseq2_up_314|5|1.58|3.43	0	.
chr9	75925200	75929399	DM_H3K27me3_cKO_DEseq2_up_315|5.15|2|3.16	0	.
chr4	119724400	119730399	DM_H3K27me3_cKO_DEseq2_up_316|5.66|3.57|2.1	0	.
chr16	94132800	94136399	DM_H3K27me3_cKO_DEseq2_up_317|5|1.3|3.7	0	.
chr5	103442000	103451799	DM_H3K27me3_cKO_DEseq2_up_318|6.47|4.96|1.51	0	.
chr4	147988400	147998199	DM_H3K27me3_cKO_DEseq2_up_319|6.25|4.51|1.74	0	.
chr10	8745600	8752999	DM_H3K27me3_cKO_DEseq2_up_320|6.01|3.99|2.02	0	.
chr2	58050000	58057399	DM_H3K27me3_cKO_DEseq2_up_321|6.59|5.2|1.4	0	.
chr8	48603400	48609199	DM_H3K27me3_cKO_DEseq2_up_322|5.8|3.89|1.91	0	.
chr13	56369800	56382799	DM_H3K27me3_cKO_DEseq2_up_323|7.08|5.89|1.19	0	.
chr10	77150000	77162399	DM_H3K27me3_cKO_DEseq2_up_324|7.04|5.76|1.27	0	.
chr17	66713200	66722399	DM_H3K27me3_cKO_DEseq2_up_325|6.31|4.71|1.6	0	.
chr6	127404600	127408999	DM_H3K27me3_cKO_DEseq2_up_326|5.83|3.84|1.99	0	.
chr11	108971400	108976999	DM_H3K27me3_cKO_DEseq2_up_327|5.54|3.31|2.23	0	.
chr1	136561400	136567799	DM_H3K27me3_cKO_DEseq2_up_328|5.89|3.99|1.91	0	.
chr2	80133800	80138199	DM_H3K27me3_cKO_DEseq2_up_329|4.95|1.32|3.64	0	.
chr3	147955000	147970999	DM_H3K27me3_cKO_DEseq2_up_330|7.7|6.58|1.13	0	.
chr1	38771800	38775199	DM_H3K27me3_cKO_DEseq2_up_331|4.91|0.99|3.92	0	.
chr8	12197000	12203999	DM_H3K27me3_cKO_DEseq2_up_332|6.35|4.77|1.58	0	.
chr6	144248800	144253799	DM_H3K27me3_cKO_DEseq2_up_333|5.62|3.44|2.18	0	.
chr13	102688000	102692999	DM_H3K27me3_cKO_DEseq2_up_334|5.55|3.23|2.32	0	.
chr8	91961600	91964999	DM_H3K27me3_cKO_DEseq2_up_335|5.04|1.79|3.25	0	.
chr15	10711400	10714599	DM_H3K27me3_cKO_DEseq2_up_336|4.88|0.57|4.31	0	.
chr1	155481200	155490399	DM_H3K27me3_cKO_DEseq2_up_337|6.63|5.14|1.49	0	.
chr19	14534800	14540199	DM_H3K27me3_cKO_DEseq2_up_338|5.49|3.24|2.26	0	.
chr12	108291400	108295399	DM_H3K27me3_cKO_DEseq2_up_339|5.13|1.99|3.13	0	.
chr6	38893600	38906399	DM_H3K27me3_cKO_DEseq2_up_340|6.75|5.38|1.37	0	.
chr2	49807800	49813399	DM_H3K27me3_cKO_DEseq2_up_341|5.76|3.79|1.97	0	.
chr1	33577200	33580599	DM_H3K27me3_cKO_DEseq2_up_342|4.9|0.98|3.92	0	.
chr17	85431600	85434799	DM_H3K27me3_cKO_DEseq2_up_343|5|1.56|3.44	0	.
chr6	37331400	37336799	DM_H3K27me3_cKO_DEseq2_up_344|5.66|3.32|2.34	0	.
chr9	61465200	61472799	DM_H3K27me3_cKO_DEseq2_up_345|6.2|4.51|1.69	0	.
chr4	132108200	132116599	DM_H3K27me3_cKO_DEseq2_up_346|6.21|4.57|1.65	0	.
chr5	112265000	112270199	DM_H3K27me3_cKO_DEseq2_up_347|5.39|2.98|2.41	0	.
chr4	113858400	113862599	DM_H3K27me3_cKO_DEseq2_up_348|5.31|2.79|2.52	0	.
chr18	53621800	53630799	DM_H3K27me3_cKO_DEseq2_up_349|6.75|5.43|1.32	0	.
chr16	93512200	93530199	DM_H3K27me3_cKO_DEseq2_up_350|7.3|6.16|1.14	0	.
chr2	75478400	75487399	DM_H3K27me3_cKO_DEseq2_up_351|6.36|4.84|1.51	0	.
chr2	117866600	117873799	DM_H3K27me3_cKO_DEseq2_up_352|6.14|4.51|1.63	0	.
chr11	15919200	15926199	DM_H3K27me3_cKO_DEseq2_up_353|5.77|3.74|2.03	0	.
chr6	37413400	37416199	DM_H3K27me3_cKO_DEseq2_up_354|4.89|0.98|3.91	0	.
chr18	65869000	65883799	DM_H3K27me3_cKO_DEseq2_up_355|7.16|5.95|1.2	0	.
chr4	22149800	22157599	DM_H3K27me3_cKO_DEseq2_up_356|6.49|5.05|1.44	0	.
chr12	8897400	8901199	DM_H3K27me3_cKO_DEseq2_up_357|5.65|3.57|2.07	0	.
chr7	65940000	65945399	DM_H3K27me3_cKO_DEseq2_up_358|6|4.23|1.77	0	.
chr3	79518000	79521199	DM_H3K27me3_cKO_DEseq2_up_359|4.92|0.99|3.92	0	.
chr13	15458400	15491599	DM_H3K27me3_cKO_DEseq2_up_360|8.79|7.8|0.99	0	.
chr2	170192000	170197799	DM_H3K27me3_cKO_DEseq2_up_361|6.17|4.3|1.87	0	.
chr3	153736200	153739999	DM_H3K27me3_cKO_DEseq2_up_362|5.14|2.15|2.99	0	.
chr2	103927400	103938999	DM_H3K27me3_cKO_DEseq2_up_363|6.99|5.71|1.27	0	.
chr6	50651600	50667399	DM_H3K27me3_cKO_DEseq2_up_364|7.51|6.37|1.15	0	.
chr7	143367800	143372999	DM_H3K27me3_cKO_DEseq2_up_365|5.78|3.89|1.89	0	.
chr12	20290400	20293199	DM_H3K27me3_cKO_DEseq2_up_366|4.86|0.58|4.28	0	.
chr3	87947200	87954999	DM_H3K27me3_cKO_DEseq2_up_367|6.74|5.39|1.35	0	.
chr10	73002200	73006799	DM_H3K27me3_cKO_DEseq2_up_368|5.32|2.68|2.64	0	.
chr13	44463800	44475199	DM_H3K27me3_cKO_DEseq2_up_369|6.97|5.75|1.22	0	.
chr8	83839400	83844599	DM_H3K27me3_cKO_DEseq2_up_370|5.28|2.69|2.59	0	.
chr3	144172400	144178399	DM_H3K27me3_cKO_DEseq2_up_371|5.91|4.08|1.83	0	.
chr10	62170800	62176999	DM_H3K27me3_cKO_DEseq2_up_372|6.17|4.57|1.6	0	.
chr19	59409800	59417599	DM_H3K27me3_cKO_DEseq2_up_373|6.09|4.38|1.71	0	.
chr18	48018000	48022799	DM_H3K27me3_cKO_DEseq2_up_374|5.67|3.63|2.05	0	.
chr2	56109600	56116199	DM_H3K27me3_cKO_DEseq2_up_375|5.75|3.75|2.01	0	.
chr2	157480000	157485399	DM_H3K27me3_cKO_DEseq2_up_376|5.56|3.38|2.18	0	.
chr9	60936600	60955999	DM_H3K27me3_cKO_DEseq2_up_377|7.88|6.86|1.02	0	.
chr11	88460000	88477399	DM_H3K27me3_cKO_DEseq2_up_378|7.48|6.35|1.13	0	.
chr18	14123400	14128199	DM_H3K27me3_cKO_DEseq2_up_379|5.44|3.07|2.38	0	.
chr2	152923600	152928599	DM_H3K27me3_cKO_DEseq2_up_380|5.32|2.69|2.63	0	.
chr14	100803200	100806199	DM_H3K27me3_cKO_DEseq2_up_381|4.83|0.58|4.26	0	.
chr3	37771600	37781599	DM_H3K27me3_cKO_DEseq2_up_382|6.46|5.01|1.45	0	.
chr11	74117200	74119999	DM_H3K27me3_cKO_DEseq2_up_383|4.87|0.99|3.88	0	.
chr9	119654000	119665599	DM_H3K27me3_cKO_DEseq2_up_384|6.92|5.56|1.36	0	.
chr3	83805200	83809799	DM_H3K27me3_cKO_DEseq2_up_385|5.57|3.45|2.12	0	.
chr19	39936000	39939999	DM_H3K27me3_cKO_DEseq2_up_386|5.17|2.14|3.03	0	.
chr19	25103400	25107199	DM_H3K27me3_cKO_DEseq2_up_387|5.21|2.45|2.77	0	.
chr6	100892000	100898599	DM_H3K27me3_cKO_DEseq2_up_388|5.74|3.5|2.23	0	.
chr15	58974800	58982799	DM_H3K27me3_cKO_DEseq2_up_389|6.71|5.41|1.3	0	.
chr19	58308800	58311999	DM_H3K27me3_cKO_DEseq2_up_390|5.34|2.89|2.45	0	.
chr7	29251600	29254799	DM_H3K27me3_cKO_DEseq2_up_391|4.87|0.98|3.89	0	.
chr3	98316200	98321399	DM_H3K27me3_cKO_DEseq2_up_392|5.54|3.31|2.23	0	.
chr3	147279000	147292399	DM_H3K27me3_cKO_DEseq2_up_393|6.8|5.54|1.26	0	.
chr2	160535200	160537799	DM_H3K27me3_cKO_DEseq2_up_394|5.19|2.44|2.75	0	.
chr16	92737800	92746599	DM_H3K27me3_cKO_DEseq2_up_395|6.49|5.07|1.42	0	.
chr15	82376200	82380199	DM_H3K27me3_cKO_DEseq2_up_396|5.21|2.44|2.77	0	.
chr4	125210800	125217399	DM_H3K27me3_cKO_DEseq2_up_397|5.65|3.57|2.08	0	.
chr3	98022000	98044199	DM_H3K27me3_cKO_DEseq2_up_398|8.05|7.12|0.93	0	.
chr1	185688200	185693399	DM_H3K27me3_cKO_DEseq2_up_399|5.5|3.06|2.44	0	.
chr9	95070600	95075799	DM_H3K27me3_cKO_DEseq2_up_400|5.54|3.31|2.23	0	.
chr16	24763200	24768399	DM_H3K27me3_cKO_DEseq2_up_401|5.5|3.23|2.27	0	.
chr8	87949200	87963999	DM_H3K27me3_cKO_DEseq2_up_402|7.19|5.88|1.31	0	.
chr17	88836800	88840799	DM_H3K27me3_cKO_DEseq2_up_403|5.03|1.78|3.25	0	.
chr13	114395000	114411199	DM_H3K27me3_cKO_DEseq2_up_404|7.2|6.01|1.19	0	.
chr14	48115400	48119599	DM_H3K27me3_cKO_DEseq2_up_405|5.42|2.9|2.52	0	.
chr10	100199600	100202599	DM_H3K27me3_cKO_DEseq2_up_406|5|1.56|3.44	0	.
chr7	75831600	75836599	DM_H3K27me3_cKO_DEseq2_up_407|5.37|2.89|2.48	0	.
chr6	10272400	10278999	DM_H3K27me3_cKO_DEseq2_up_408|5.6|3.57|2.03	0	.
chr2	93441800	93445799	DM_H3K27me3_cKO_DEseq2_up_409|5.19|2.3|2.89	0	.
chr9	47995800	47998599	DM_H3K27me3_cKO_DEseq2_up_410|4.85|0.98|3.87	0	.
chr2	126010800	126017399	DM_H3K27me3_cKO_DEseq2_up_411|6.35|4.89|1.46	0	.
chr2	48142800	48145599	DM_H3K27me3_cKO_DEseq2_up_412|4.85|0.99|3.85	0	.
chr14	10828800	10833999	DM_H3K27me3_cKO_DEseq2_up_413|5.46|3.23|2.22	0	.
chr12	68525000	68532199	DM_H3K27me3_cKO_DEseq2_up_414|5.7|3.74|1.96	0	.
chr2	113718800	113725199	DM_H3K27me3_cKO_DEseq2_up_415|5.81|3.94|1.87	0	.
chr8	92113400	92130599	DM_H3K27me3_cKO_DEseq2_up_416|7.58|6.49|1.08	0	.
chr17	83306000	83315799	DM_H3K27me3_cKO_DEseq2_up_417|6.6|5.2|1.4	0	.
chr5	92803400	92812599	DM_H3K27me3_cKO_DEseq2_up_418|6.51|5.1|1.41	0	.
chr15	86960000	86966799	DM_H3K27me3_cKO_DEseq2_up_419|5.88|4.11|1.77	0	.
chr6	100581800	100588399	DM_H3K27me3_cKO_DEseq2_up_420|5.9|3.9|2	0	.
chr7	10460800	10470199	DM_H3K27me3_cKO_DEseq2_up_421|6.22|4.63|1.59	0	.
chr14	47981000	47989799	DM_H3K27me3_cKO_DEseq2_up_422|6.8|5.53|1.27	0	.
chr10	93496000	93502999	DM_H3K27me3_cKO_DEseq2_up_423|5.94|4.15|1.79	0	.
chr5	77119200	77128199	DM_H3K27me3_cKO_DEseq2_up_424|6.83|5.56|1.28	0	.
chr2	115451800	115460799	DM_H3K27me3_cKO_DEseq2_up_425|6.58|5.14|1.44	0	.
chr7	37137800	37155799	DM_H3K27me3_cKO_DEseq2_up_426|7.49|6.47|1.02	0	.
chr7	131636000	131658399	DM_H3K27me3_cKO_DEseq2_up_427|8.13|7.13|1	0	.
chr5	148827600	148842399	DM_H3K27me3_cKO_DEseq2_up_428|7.3|6.2|1.09	0	.
chr9	48251400	48254399	DM_H3K27me3_cKO_DEseq2_up_429|4.89|1.3|3.59	0	.
chr5	74724800	74735799	DM_H3K27me3_cKO_DEseq2_up_430|6.47|4.91|1.55	0	.
chr8	79826800	79836999	DM_H3K27me3_cKO_DEseq2_up_431|6.45|5.03|1.42	0	.
chr7	47971600	47976199	DM_H3K27me3_cKO_DEseq2_up_432|4.96|1.58|3.38	0	.
chr6	136877800	136888999	DM_H3K27me3_cKO_DEseq2_up_433|6.76|5.3|1.46	0	.
chr11	63497000	63507599	DM_H3K27me3_cKO_DEseq2_up_434|6.6|5.23|1.36	0	.
chr4	39746600	39750799	DM_H3K27me3_cKO_DEseq2_up_435|5.19|2.57|2.62	0	.
chr14	25754400	25760399	DM_H3K27me3_cKO_DEseq2_up_436|6.03|4.35|1.68	0	.
chr17	85253200	85259799	DM_H3K27me3_cKO_DEseq2_up_437|5.9|4.12|1.78	0	.
chr19	24311400	24319799	DM_H3K27me3_cKO_DEseq2_up_438|6.41|4.96|1.45	0	.
chr11	68235600	68240799	DM_H3K27me3_cKO_DEseq2_up_439|5.68|3.63|2.04	0	.
chr8	108903000	108909199	DM_H3K27me3_cKO_DEseq2_up_440|5.88|4.07|1.81	0	.
chr16	91530800	91536799	DM_H3K27me3_cKO_DEseq2_up_441|5.43|3.07|2.37	0	.
chr10	42416000	42420199	DM_H3K27me3_cKO_DEseq2_up_442|6.14|4.54|1.6	0	.
chr12	86170800	86176199	DM_H3K27me3_cKO_DEseq2_up_443|6.23|4.6|1.63	0	.
chr2	165076400	165081599	DM_H3K27me3_cKO_DEseq2_up_444|6|4.34|1.66	0	.
chr11	113981200	113983999	DM_H3K27me3_cKO_DEseq2_up_445|4.84|-0.01|4.85	0	.
chr1	189641600	189649199	DM_H3K27me3_cKO_DEseq2_up_446|5.91|4.11|1.79	0	.
chr14	16570800	16579399	DM_H3K27me3_cKO_DEseq2_up_447|6.55|5.2|1.36	0	.
chr5	52696400	52702799	DM_H3K27me3_cKO_DEseq2_up_448|5.55|3.44|2.11	0	.
chr10	23596800	23606199	DM_H3K27me3_cKO_DEseq2_up_449|6.42|5.01|1.41	0	.
chr2	167835600	167843799	DM_H3K27me3_cKO_DEseq2_up_450|6.26|4.77|1.49	0	.
chr12	12865800	12878399	DM_H3K27me3_cKO_DEseq2_up_451|6.94|5.7|1.24	0	.
chr2	173400200	173414999	DM_H3K27me3_cKO_DEseq2_up_452|6.96|5.69|1.28	0	.
chr11	88382000	88398199	DM_H3K27me3_cKO_DEseq2_up_453|7.34|6.25|1.09	0	.
chr19	40771000	40785399	DM_H3K27me3_cKO_DEseq2_up_454|6.73|5.36|1.37	0	.
chr1	41285400	41288599	DM_H3K27me3_cKO_DEseq2_up_455|5.05|2.15|2.9	0	.
chr8	91674400	91684399	DM_H3K27me3_cKO_DEseq2_up_456|7.09|5.96|1.13	0	.
chr11	115807200	115810599	DM_H3K27me3_cKO_DEseq2_up_457|5.63|3.45|2.18	0	.
chr14	33728800	33750999	DM_H3K27me3_cKO_DEseq2_up_458|7.86|6.87|0.98	0	.
chr2	93242600	93261199	DM_H3K27me3_cKO_DEseq2_up_459|7.83|6.87|0.96	0	.
chr2	9704600	9710799	DM_H3K27me3_cKO_DEseq2_up_460|5.82|4.03|1.79	0	.
chr4	82634400	82646799	DM_H3K27me3_cKO_DEseq2_up_461|7|5.82|1.18	0	.
chr19	60054400	60057199	DM_H3K27me3_cKO_DEseq2_up_462|4.81|-0.01|4.83	0	.
chr7	138681600	138688599	DM_H3K27me3_cKO_DEseq2_up_463|6.04|4.31|1.73	0	.
chr17	85396000	85405599	DM_H3K27me3_cKO_DEseq2_up_464|6.82|5.54|1.28	0	.
chr14	29410200	29414599	DM_H3K27me3_cKO_DEseq2_up_465|5.04|2.15|2.89	0	.
chr19	59860600	59870799	DM_H3K27me3_cKO_DEseq2_up_466|6.76|5.49|1.27	0	.
chr4	68126000	68129199	DM_H3K27me3_cKO_DEseq2_up_467|4.78|0.57|4.21	0	.
chr18	55520000	55529599	DM_H3K27me3_cKO_DEseq2_up_468|6.82|5.58|1.24	0	.
chr3	87129400	87140399	DM_H3K27me3_cKO_DEseq2_up_469|6.86|5.59|1.28	0	.
chr17	66565200	66584399	DM_H3K27me3_cKO_DEseq2_up_470|7.38|6.33|1.04	0	.
chr11	107772800	107778999	DM_H3K27me3_cKO_DEseq2_up_471|6.12|4.51|1.61	0	.
chr14	48238000	48249399	DM_H3K27me3_cKO_DEseq2_up_472|6.8|5.54|1.25	0	.
chr13	72493400	72501199	DM_H3K27me3_cKO_DEseq2_up_473|6.23|4.61|1.62	0	.
chr7	67462200	67469799	DM_H3K27me3_cKO_DEseq2_up_474|6.28|4.77|1.51	0	.
chr8	114841600	114857199	DM_H3K27me3_cKO_DEseq2_up_475|7.54|6.54|1.01	0	.
chr19	47441800	47449199	DM_H3K27me3_cKO_DEseq2_up_476|6.56|5.2|1.36	0	.
chr8	110181200	110184799	DM_H3K27me3_cKO_DEseq2_up_477|5.48|3.23|2.26	0	.
chr10	5562600	5568999	DM_H3K27me3_cKO_DEseq2_up_478|5.65|3.68|1.96	0	.
chr9	120737800	120744999	DM_H3K27me3_cKO_DEseq2_up_479|5.96|4.2|1.76	0	.
chr9	84961000	84964199	DM_H3K27me3_cKO_DEseq2_up_480|4.79|-0.01|4.8	0	.
chr4	151742200	151745399	DM_H3K27me3_cKO_DEseq2_up_481|5.02|1.78|3.24	0	.
chr3	34305000	34316999	DM_H3K27me3_cKO_DEseq2_up_482|7.36|6.3|1.06	0	.
chr6	137134000	137157399	DM_H3K27me3_cKO_DEseq2_up_483|8.22|7.25|0.97	0	.
chr9	48273800	48277999	DM_H3K27me3_cKO_DEseq2_up_484|5.09|2.16|2.92	0	.
chr11	103710200	103721599	DM_H3K27me3_cKO_DEseq2_up_485|6.82|5.54|1.28	0	.
chr14	63437600	63440599	DM_H3K27me3_cKO_DEseq2_up_486|4.84|1.31|3.53	0	.
chr19	42507800	42514399	DM_H3K27me3_cKO_DEseq2_up_487|5.67|3.5|2.17	0	.
chr10	99696200	99699999	DM_H3K27me3_cKO_DEseq2_up_488|5.38|2.88|2.5	0	.
chr8	87814000	87825199	DM_H3K27me3_cKO_DEseq2_up_489|6.79|5.51|1.28	0	.
chr8	95396600	95400199	DM_H3K27me3_cKO_DEseq2_up_490|5.08|2.31|2.77	0	.
chr2	166167600	166174199	DM_H3K27me3_cKO_DEseq2_up_491|6.01|4.35|1.66	0	.
chr10	59625200	59630999	DM_H3K27me3_cKO_DEseq2_up_492|5.75|3.74|2.02	0	.
chr4	137191800	137201799	DM_H3K27me3_cKO_DEseq2_up_493|6.5|5.07|1.43	0	.
chr15	88210800	88218199	DM_H3K27me3_cKO_DEseq2_up_494|5.89|4.15|1.74	0	.
chr3	144301800	144306999	DM_H3K27me3_cKO_DEseq2_up_495|5.92|4.23|1.69	0	.
chr4	115873600	115883999	DM_H3K27me3_cKO_DEseq2_up_496|6.42|4.91|1.51	0	.
chr3	128336800	128349199	DM_H3K27me3_cKO_DEseq2_up_497|7.15|6.05|1.1	0	.
chr10	67538400	67541199	DM_H3K27me3_cKO_DEseq2_up_498|4.8|0.98|3.82	0	.
chr8	78261600	78283199	DM_H3K27me3_cKO_DEseq2_up_499|7.77|6.8|0.96	0	.
chr19	5542000	5548599	DM_H3K27me3_cKO_DEseq2_up_500|5.86|4.03|1.83	0	.
chr6	51698800	51704199	DM_H3K27me3_cKO_DEseq2_up_501|5.63|3.63|2	0	.
chr3	127742400	127760399	DM_H3K27me3_cKO_DEseq2_up_502|7.96|7.02|0.95	0	.
chr11	72507200	72510199	DM_H3K27me3_cKO_DEseq2_up_503|4.77|-0.01|4.79	0	.
chr17	83190200	83206599	DM_H3K27me3_cKO_DEseq2_up_504|7.36|6.29|1.07	0	.
chr3	87157200	87161399	DM_H3K27me3_cKO_DEseq2_up_505|5.27|2.79|2.49	0	.
chr11	88755800	88771999	DM_H3K27me3_cKO_DEseq2_up_506|7.6|6.58|1.02	0	.
chr1	190660800	190673799	DM_H3K27me3_cKO_DEseq2_up_507|7.04|5.83|1.2	0	.
chr15	13182800	13187399	DM_H3K27me3_cKO_DEseq2_up_508|5.37|3.08|2.29	0	.
chr14	100155400	100159399	DM_H3K27me3_cKO_DEseq2_up_509|4.92|1.79|3.13	0	.
chr2	146217400	146228199	DM_H3K27me3_cKO_DEseq2_up_510|6.83|5.46|1.36	0	.
chr9	34920400	34924999	DM_H3K27me3_cKO_DEseq2_up_511|5.42|3.08|2.33	0	.
chr5	103676200	103686999	DM_H3K27me3_cKO_DEseq2_up_512|6.42|4.94|1.48	0	.
chr11	112706800	112712999	DM_H3K27me3_cKO_DEseq2_up_513|5.93|4.11|1.82	0	.
chr19	53086800	53093199	DM_H3K27me3_cKO_DEseq2_up_514|5.96|4.24|1.72	0	.
chr12	112162000	112165799	DM_H3K27me3_cKO_DEseq2_up_515|5.16|2.57|2.59	0	.
chr11	32956800	32969999	DM_H3K27me3_cKO_DEseq2_up_516|7.04|5.93|1.12	0	.
chr5	22354200	22357599	DM_H3K27me3_cKO_DEseq2_up_517|4.85|1.3|3.55	0	.
chr7	134872200	134882799	DM_H3K27me3_cKO_DEseq2_up_518|6.69|5.43|1.27	0	.
chr8	114807000	114810799	DM_H3K27me3_cKO_DEseq2_up_519|5.66|3.5|2.16	0	.
chr4	125967800	125980199	DM_H3K27me3_cKO_DEseq2_up_520|6.99|5.72|1.26	0	.
chr2	56618600	56621799	DM_H3K27me3_cKO_DEseq2_up_521|4.84|1.3|3.54	0	.
chr6	137004000	137007399	DM_H3K27me3_cKO_DEseq2_up_522|5.1|2.14|2.96	0	.
chr7	112812800	112816999	DM_H3K27me3_cKO_DEseq2_up_523|5.22|2.58|2.64	0	.
chr10	30321600	30330799	DM_H3K27me3_cKO_DEseq2_up_524|6.41|4.99|1.42	0	.
chr8	58629400	58632999	DM_H3K27me3_cKO_DEseq2_up_525|4.78|0.99|3.78	0	.
chr9	13538400	13541599	DM_H3K27me3_cKO_DEseq2_up_526|5.46|3.3|2.15	0	.
chr6	34737600	34742199	DM_H3K27me3_cKO_DEseq2_up_527|5.37|3.16|2.22	0	.
chr3	141333600	141340399	DM_H3K27me3_cKO_DEseq2_up_528|5.91|4.2|1.71	0	.
chr14	27041400	27057999	DM_H3K27me3_cKO_DEseq2_up_529|7.36|6.31|1.05	0	.
chr11	88443200	88450799	DM_H3K27me3_cKO_DEseq2_up_530|6.45|4.85|1.6	0	.
chr4	24893400	24896799	DM_H3K27me3_cKO_DEseq2_up_531|4.78|0.99|3.79	0	.
chr9	56580400	56585199	DM_H3K27me3_cKO_DEseq2_up_532|5.58|3.57|2	0	.
chr2	170657400	170662999	DM_H3K27me3_cKO_DEseq2_up_533|5.84|4.11|1.73	0	.
chr11	19374200	19381599	DM_H3K27me3_cKO_DEseq2_up_534|5.91|4.16|1.75	0	.
chr2	58093400	58095999	DM_H3K27me3_cKO_DEseq2_up_535|5.05|2.15|2.9	0	.
chr3	39070400	39077999	DM_H3K27me3_cKO_DEseq2_up_536|5.86|4.15|1.71	0	.
chr2	165174800	165186599	DM_H3K27me3_cKO_DEseq2_up_537|6.69|5.4|1.29	0	.
chr5	111868000	111873199	DM_H3K27me3_cKO_DEseq2_up_538|5.68|3.74|1.94	0	.
chr1	181559200	181562399	DM_H3K27me3_cKO_DEseq2_up_539|4.76|-0.01|4.78	0	.
chr7	113029800	113032599	DM_H3K27me3_cKO_DEseq2_up_540|4.76|-0.01|4.78	0	.
chr9	35300800	35304999	DM_H3K27me3_cKO_DEseq2_up_541|5.2|2.58|2.63	0	.
chr9	117848000	117857799	DM_H3K27me3_cKO_DEseq2_up_542|6.54|5.2|1.34	0	.
chr1	6418600	6422399	DM_H3K27me3_cKO_DEseq2_up_543|5.06|2.31|2.75	0	.
chr7	37542200	37570199	DM_H3K27me3_cKO_DEseq2_up_544|8.45|7.54|0.92	0	.
chr6	136854600	136868799	DM_H3K27me3_cKO_DEseq2_up_545|7.13|5.99|1.14	0	.
chr5	111554200	111557199	DM_H3K27me3_cKO_DEseq2_up_546|5.11|2.3|2.81	0	.
chr9	98701000	98713799	DM_H3K27me3_cKO_DEseq2_up_547|6.89|5.73|1.16	0	.
chr4	125222000	125232399	DM_H3K27me3_cKO_DEseq2_up_548|6.69|5.43|1.26	0	.
chr12	56295600	56302599	DM_H3K27me3_cKO_DEseq2_up_549|6.34|4.89|1.45	0	.
chr4	126655000	126661999	DM_H3K27me3_cKO_DEseq2_up_550|6.09|4.42|1.68	0	.
chr6	53201200	53214199	DM_H3K27me3_cKO_DEseq2_up_551|6.88|5.67|1.21	0	.
chr8	18150400	18159199	DM_H3K27me3_cKO_DEseq2_up_552|6.25|4.72|1.54	0	.
chr17	79815600	79821799	DM_H3K27me3_cKO_DEseq2_up_553|5.98|4.34|1.64	0	.
chr17	67309600	67317199	DM_H3K27me3_cKO_DEseq2_up_554|6.13|4.38|1.74	0	.
chr11	89895400	89903399	DM_H3K27me3_cKO_DEseq2_up_555|6.46|4.99|1.47	0	.
chr8	36511200	36516599	DM_H3K27me3_cKO_DEseq2_up_556|5.54|3.23|2.31	0	.
chr8	121027400	121033999	DM_H3K27me3_cKO_DEseq2_up_557|5.78|3.84|1.94	0	.
chr7	130118400	130121199	DM_H3K27me3_cKO_DEseq2_up_558|5.02|2.15|2.87	0	.
chr4	154443800	154448599	DM_H3K27me3_cKO_DEseq2_up_559|5.38|3.16|2.22	0	.
chr3	34453400	34460999	DM_H3K27me3_cKO_DEseq2_up_560|6.45|5.07|1.38	0	.
chr10	120519400	120528599	DM_H3K27me3_cKO_DEseq2_up_561|6.45|4.96|1.49	0	.
chr9	41288800	41294999	DM_H3K27me3_cKO_DEseq2_up_562|5.72|3.79|1.93	0	.
chr16	10324800	10329999	DM_H3K27me3_cKO_DEseq2_up_563|5.64|3.56|2.08	0	.
chr16	90439000	90448199	DM_H3K27me3_cKO_DEseq2_up_564|6.67|5.29|1.38	0	.
chr3	87091600	87107199	DM_H3K27me3_cKO_DEseq2_up_565|7.13|6|1.13	0	.
chr1	136226200	136234199	DM_H3K27me3_cKO_DEseq2_up_566|6.38|4.92|1.46	0	.
chr10	121232800	121244199	DM_H3K27me3_cKO_DEseq2_up_567|6.76|5.52|1.24	0	.
chr3	37611000	37618399	DM_H3K27me3_cKO_DEseq2_up_568|6.5|5.18|1.32	0	.
chr17	31752000	31755599	DM_H3K27me3_cKO_DEseq2_up_569|5.13|2.44|2.69	0	.
chr7	145178200	145181399	DM_H3K27me3_cKO_DEseq2_up_570|4.72|0.57|4.16	0	.
chr8	48721400	48727199	DM_H3K27me3_cKO_DEseq2_up_571|5.69|3.75|1.95	0	.
chr1	57642200	57646399	DM_H3K27me3_cKO_DEseq2_up_572|5.19|2.69|2.5	0	.
chr9	32726400	32729399	DM_H3K27me3_cKO_DEseq2_up_573|5.07|2.3|2.77	0	.
chr11	96895400	96904199	DM_H3K27me3_cKO_DEseq2_up_574|6.76|5.48|1.28	0	.
chr2	63570000	63577399	DM_H3K27me3_cKO_DEseq2_up_575|6.37|4.94|1.44	0	.
chr2	158102400	158106199	DM_H3K27me3_cKO_DEseq2_up_576|5.09|2.3|2.79	0	.
chr1	135075400	135078999	DM_H3K27me3_cKO_DEseq2_up_577|4.88|1.58|3.3	0	.
chr3	146027000	146031399	DM_H3K27me3_cKO_DEseq2_up_578|5.41|3.23|2.18	0	.
chr12	111265400	111276399	DM_H3K27me3_cKO_DEseq2_up_579|7.06|5.74|1.32	0	.
chr13	53780000	53782999	DM_H3K27me3_cKO_DEseq2_up_580|4.75|-0.01|4.76	0	.
chr18	68897000	68901799	DM_H3K27me3_cKO_DEseq2_up_581|5.28|2.89|2.39	0	.
chr19	15020600	15042999	DM_H3K27me3_cKO_DEseq2_up_582|7.52|6.52|1.01	0	.
chr4	8820200	8828999	DM_H3K27me3_cKO_DEseq2_up_583|6.57|5.25|1.31	0	.
chr16	94113400	94127199	DM_H3K27me3_cKO_DEseq2_up_584|7.6|6.61|0.99	0	.
chr9	102244600	102251199	DM_H3K27me3_cKO_DEseq2_up_585|6.1|4.54|1.56	0	.
chr19	24031200	24035999	DM_H3K27me3_cKO_DEseq2_up_586|5.8|4.03|1.77	0	.
chr8	46234800	46241599	DM_H3K27me3_cKO_DEseq2_up_587|5.9|4.15|1.75	0	.
chr7	79384600	79388199	DM_H3K27me3_cKO_DEseq2_up_588|5.51|3.45|2.07	0	.
chr18	66446200	66456199	DM_H3K27me3_cKO_DEseq2_up_589|6.66|5.3|1.35	0	.
chr14	32689800	32695999	DM_H3K27me3_cKO_DEseq2_up_590|5.62|3.69|1.93	0	.
chr9	63888600	63893399	DM_H3K27me3_cKO_DEseq2_up_591|5.65|3.69|1.96	0	.
chr11	113806000	113809199	DM_H3K27me3_cKO_DEseq2_up_592|4.76|0.98|3.78	0	.
chr9	105547400	105559599	DM_H3K27me3_cKO_DEseq2_up_593|6.87|5.58|1.29	0	.
chr4	122998800	123000799	DM_H3K27me3_cKO_DEseq2_up_594|4.71|0.58|4.14	0	.
chr9	54302400	54311399	DM_H3K27me3_cKO_DEseq2_up_595|6.36|4.89|1.47	0	.
chr9	42787400	42790599	DM_H3K27me3_cKO_DEseq2_up_596|4.74|-0.01|4.75	0	.
chr4	120839800	120848399	DM_H3K27me3_cKO_DEseq2_up_597|6.26|4.77|1.49	0	.
chr19	53795200	53798799	DM_H3K27me3_cKO_DEseq2_up_598|5.12|2.57|2.55	0	.
chr18	15173600	15176999	DM_H3K27me3_cKO_DEseq2_up_599|5.1|2.44|2.66	0	.
chr15	7838200	7844799	DM_H3K27me3_cKO_DEseq2_up_600|6.05|4.38|1.67	0	.
chr7	133110800	133123199	DM_H3K27me3_cKO_DEseq2_up_601|6.8|5.48|1.32	0	.
chr18	53116800	53124599	DM_H3K27me3_cKO_DEseq2_up_602|6.12|4.47|1.65	0	.
chr6	5620000	5623799	DM_H3K27me3_cKO_DEseq2_up_603|4.73|0.58|4.15	0	.
chr9	64664000	64670599	DM_H3K27me3_cKO_DEseq2_up_604|5.9|4.23|1.66	0	.
chr3	116380000	116383599	DM_H3K27me3_cKO_DEseq2_up_605|5.19|2.69|2.5	0	.
chr3	147834200	147837199	DM_H3K27me3_cKO_DEseq2_up_606|4.94|1.99|2.95	0	.
chr1	188676600	188681599	DM_H3K27me3_cKO_DEseq2_up_607|5.7|3.89|1.81	0	.
chr6	53282600	53331799	DM_H3K27me3_cKO_DEseq2_up_608|9.42|8.59|0.83	0	.
chr14	60453200	60456399	DM_H3K27me3_cKO_DEseq2_up_609|4.94|1.98|2.96	0	.
chr5	116787800	116792599	DM_H3K27me3_cKO_DEseq2_up_610|5.44|3.31|2.13	0	.
chr5	41069000	41072399	DM_H3K27me3_cKO_DEseq2_up_611|5.04|2.31|2.73	0	.
chr8	18737400	18746199	DM_H3K27me3_cKO_DEseq2_up_612|6.81|5.6|1.21	0	.
chr3	89876800	89888199	DM_H3K27me3_cKO_DEseq2_up_613|6.77|5.57|1.2	0	.
chr9	40538200	40540999	DM_H3K27me3_cKO_DEseq2_up_614|4.73|-0.01|4.74	0	.
chr7	137080000	137093999	DM_H3K27me3_cKO_DEseq2_up_615|7.22|6.04|1.18	0	.
chr10	3220400	3225599	DM_H3K27me3_cKO_DEseq2_up_616|5.89|4.02|1.87	0	.
chr15	25605000	25612399	DM_H3K27me3_cKO_DEseq2_up_617|5.89|4.07|1.82	0	.
chr2	75130800	75152599	DM_H3K27me3_cKO_DEseq2_up_618|8.23|7.32|0.91	0	.
chr9	97055400	97062799	DM_H3K27me3_cKO_DEseq2_up_619|6.27|4.76|1.5	0	.
chr10	126764400	126767399	DM_H3K27me3_cKO_DEseq2_up_620|4.69|0.58|4.12	0	.
chr4	58987000	58994799	DM_H3K27me3_cKO_DEseq2_up_621|6.18|4.66|1.53	0	.
chr2	117473000	117485399	DM_H3K27me3_cKO_DEseq2_up_622|7.39|6.34|1.05	0	.
chr11	68353800	68357799	DM_H3K27me3_cKO_DEseq2_up_623|5.27|2.79|2.49	0	.
chr13	57359800	57372599	DM_H3K27me3_cKO_DEseq2_up_624|7.03|5.88|1.15	0	.
chr3	55074200	55077199	DM_H3K27me3_cKO_DEseq2_up_625|4.74|0.98|3.76	0	.
chr13	54038800	54044199	DM_H3K27me3_cKO_DEseq2_up_626|5.4|3.23|2.17	0	.
chr15	8815000	8817599	DM_H3K27me3_cKO_DEseq2_up_627|4.7|-0.01|4.71	0	.
chr1	88901400	88905399	DM_H3K27me3_cKO_DEseq2_up_628|5.08|2.45|2.64	0	.
chr13	10830000	10836399	DM_H3K27me3_cKO_DEseq2_up_629|5.65|3.79|1.86	0	.
chr14	28552400	28560799	DM_H3K27me3_cKO_DEseq2_up_630|6.23|4.77|1.47	0	.
chr10	120300000	120308999	DM_H3K27me3_cKO_DEseq2_up_631|6.63|5.23|1.4	0	.
chr17	56146800	56157999	DM_H3K27me3_cKO_DEseq2_up_632|6.74|5.45|1.3	0	.
chr16	57794000	57804799	DM_H3K27me3_cKO_DEseq2_up_633|6.49|5.18|1.31	0	.
chr4	148653400	148659599	DM_H3K27me3_cKO_DEseq2_up_634|5.83|4.03|1.8	0	.
chr4	93857000	93860599	DM_H3K27me3_cKO_DEseq2_up_635|5.1|2.32|2.78	0	.
chr12	99731400	99740999	DM_H3K27me3_cKO_DEseq2_up_636|6.67|5.38|1.29	0	.
chr4	153779800	153797399	DM_H3K27me3_cKO_DEseq2_up_637|7.69|6.75|0.94	0	.
chr10	93010400	93015799	DM_H3K27me3_cKO_DEseq2_up_638|5.68|3.8|1.88	0	.
chr16	44682600	44690999	DM_H3K27me3_cKO_DEseq2_up_639|6.77|5.58|1.19	0	.
chr3	60916800	60920999	DM_H3K27me3_cKO_DEseq2_up_640|5.13|2.32|2.81	0	.
chr17	30748200	30752999	DM_H3K27me3_cKO_DEseq2_up_641|5.55|3.57|1.98	0	.
chr15	80568400	80574999	DM_H3K27me3_cKO_DEseq2_up_642|5.74|3.94|1.8	0	.
chr2	31498000	31506199	DM_H3K27me3_cKO_DEseq2_up_643|6.46|5.1|1.37	0	.
chr10	126222800	126226799	DM_H3K27me3_cKO_DEseq2_up_644|4.96|1.98|2.98	0	.
chr2	123683400	123686999	DM_H3K27me3_cKO_DEseq2_up_645|5.21|2.79|2.41	0	.
chr7	37093800	37106599	DM_H3K27me3_cKO_DEseq2_up_646|6.94|5.75|1.18	0	.
chr15	12755000	12757199	DM_H3K27me3_cKO_DEseq2_up_647|4.77|1.31|3.46	0	.
chr8	88541200	88550399	DM_H3K27me3_cKO_DEseq2_up_648|6.43|5.05|1.38	0	.
chr18	21950800	21961399	DM_H3K27me3_cKO_DEseq2_up_649|6.64|5.38|1.26	0	.
chr1	54846600	54855999	DM_H3K27me3_cKO_DEseq2_up_650|6.47|5.07|1.39	0	.
chr8	78551400	78557599	DM_H3K27me3_cKO_DEseq2_up_651|5.91|4.27|1.64	0	.
chr11	119095400	119102399	DM_H3K27me3_cKO_DEseq2_up_652|6.08|4.41|1.67	0	.
chr4	97598000	97612199	DM_H3K27me3_cKO_DEseq2_up_653|7.26|6.24|1.02	0	.
chr10	94037000	94048199	DM_H3K27me3_cKO_DEseq2_up_654|6.83|5.55|1.28	0	.
chr14	54563600	54567999	DM_H3K27me3_cKO_DEseq2_up_655|5.09|2.45|2.64	0	.
chr4	130964800	130975599	DM_H3K27me3_cKO_DEseq2_up_656|6.85|5.63|1.22	0	.
chr9	42930600	42941199	DM_H3K27me3_cKO_DEseq2_up_657|6.28|4.69|1.59	0	.
chr7	34604600	34608199	DM_H3K27me3_cKO_DEseq2_up_658|5.48|3.22|2.26	0	.
chr19	10381000	10385399	DM_H3K27me3_cKO_DEseq2_up_659|5.17|2.58|2.59	0	.
chr3	66795000	66801199	DM_H3K27me3_cKO_DEseq2_up_660|6|4.41|1.59	0	.
chr19	3396600	3402999	DM_H3K27me3_cKO_DEseq2_up_661|5.9|4.19|1.71	0	.
chr9	42783800	42786399	DM_H3K27me3_cKO_DEseq2_up_662|4.68|-0.01|4.69	0	.
chr15	86375800	86381599	DM_H3K27me3_cKO_DEseq2_up_663|5.53|3.57|1.96	0	.
chr5	30766200	30775399	DM_H3K27me3_cKO_DEseq2_up_664|6.45|5.1|1.35	0	.
chr12	48316400	48320599	DM_H3K27me3_cKO_DEseq2_up_665|5.41|3.31|2.1	0	.
chr4	8795600	8813799	DM_H3K27me3_cKO_DEseq2_up_666|7.66|6.62|1.04	0	.
chr12	53791200	53803599	DM_H3K27me3_cKO_DEseq2_up_667|6.97|5.82|1.15	0	.
chr6	50642000	50645599	DM_H3K27me3_cKO_DEseq2_up_668|5.47|3.45|2.02	0	.
chr11	45402400	45408999	DM_H3K27me3_cKO_DEseq2_up_669|5.74|3.94|1.8	0	.
chr4	105166200	105171799	DM_H3K27me3_cKO_DEseq2_up_670|6.59|5.32|1.26	0	.
chr18	64704200	64707199	DM_H3K27me3_cKO_DEseq2_up_671|4.72|0.98|3.74	0	.
chr12	86336000	86339199	DM_H3K27me3_cKO_DEseq2_up_672|5.13|2.45|2.68	0	.
chr7	112684200	112703399	DM_H3K27me3_cKO_DEseq2_up_673|7.58|6.45|1.14	0	.
chr2	179199800	179214799	DM_H3K27me3_cKO_DEseq2_up_674|7.34|6.31|1.03	0	.
chr8	123125200	123130399	DM_H3K27me3_cKO_DEseq2_up_675|5.62|3.57|2.05	0	.
chr3	24081200	24086799	DM_H3K27me3_cKO_DEseq2_up_676|5.46|3.44|2.01	0	.
chr11	85169000	85178199	DM_H3K27me3_cKO_DEseq2_up_677|6.09|4.54|1.55	0	.
chr5	110855800	110860199	DM_H3K27me3_cKO_DEseq2_up_678|5.17|2.58|2.59	0	.
chr11	26877800	26881799	DM_H3K27me3_cKO_DEseq2_up_679|4.99|2.16|2.83	0	.
chr13	37500200	37512999	DM_H3K27me3_cKO_DEseq2_up_680|7.03|5.92|1.11	0	.
chr19	24160000	24163799	DM_H3K27me3_cKO_DEseq2_up_681|5.36|3.15|2.2	0	.
chr3	101956000	101966799	DM_H3K27me3_cKO_DEseq2_up_682|7.14|6.03|1.1	0	.
chr17	36699400	36703399	DM_H3K27me3_cKO_DEseq2_up_683|5.07|2.45|2.62	0	.
chr2	173140200	173146199	DM_H3K27me3_cKO_DEseq2_up_684|6.04|4.44|1.6	0	.
chr4	153219600	153242599	DM_H3K27me3_cKO_DEseq2_up_685|7.83|6.84|1	0	.
chr14	59618800	59631799	DM_H3K27me3_cKO_DEseq2_up_686|7.1|5.99|1.11	0	.
chr6	98112600	98121599	DM_H3K27me3_cKO_DEseq2_up_687|6.68|5.38|1.31	0	.
chr15	60154400	60160599	DM_H3K27me3_cKO_DEseq2_up_688|5.73|3.73|1.99	0	.
chr15	80581600	80588999	DM_H3K27me3_cKO_DEseq2_up_689|5.82|4.11|1.7	0	.
chr8	126599400	126603199	DM_H3K27me3_cKO_DEseq2_up_690|5.12|2.57|2.55	0	.
chr16	30487800	30492599	DM_H3K27me3_cKO_DEseq2_up_691|5.57|3.68|1.89	0	.
chr2	28707800	28713399	DM_H3K27me3_cKO_DEseq2_up_692|5.85|4.08|1.77	0	.
chr7	65862600	65877799	DM_H3K27me3_cKO_DEseq2_up_693|7.49|6.51|0.98	0	.
chr15	82681800	82687199	DM_H3K27me3_cKO_DEseq2_up_694|5.42|3.31|2.11	0	.
chr6	35951000	35956799	DM_H3K27me3_cKO_DEseq2_up_695|5.53|3.57|1.96	0	.
chr16	9090000	9094399	DM_H3K27me3_cKO_DEseq2_up_696|5.4|3.31|2.09	0	.
chr4	97925400	97929799	DM_H3K27me3_cKO_DEseq2_up_697|5.39|3.31|2.08	0	.
chr12	30602400	30612599	DM_H3K27me3_cKO_DEseq2_up_698|6.63|5.39|1.24	0	.
chr12	37444000	37449599	DM_H3K27me3_cKO_DEseq2_up_699|6.25|4.84|1.41	0	.
chr4	97899600	97907799	DM_H3K27me3_cKO_DEseq2_up_700|6.08|4.57|1.51	0	.
chr9	116198000	116201999	DM_H3K27me3_cKO_DEseq2_up_701|5.54|3.63|1.91	0	.
chr11	9700600	9705999	DM_H3K27me3_cKO_DEseq2_up_702|5.5|3.51|1.99	0	.
chr8	48585800	48602599	DM_H3K27me3_cKO_DEseq2_up_703|7.24|6.2|1.04	0	.
chr5	74074200	74080599	DM_H3K27me3_cKO_DEseq2_up_704|6.03|4.51|1.52	0	.
chr9	58699000	58712599	DM_H3K27me3_cKO_DEseq2_up_705|7.22|6.08|1.14	0	.
chr12	80060400	80067199	DM_H3K27me3_cKO_DEseq2_up_706|6.2|4.58|1.62	0	.
chr3	31950000	31956399	DM_H3K27me3_cKO_DEseq2_up_707|5.9|4.12|1.78	0	.
chr3	154121400	154130799	DM_H3K27me3_cKO_DEseq2_up_708|6.77|5.53|1.24	0	.
chr4	133445600	133451799	DM_H3K27me3_cKO_DEseq2_up_709|5.85|4.19|1.66	0	.
chr8	94559200	94570999	DM_H3K27me3_cKO_DEseq2_up_710|6.55|5.12|1.43	0	.
chr14	34040200	34044799	DM_H3K27me3_cKO_DEseq2_up_711|5.46|3.45|2.01	0	.
chr11	96883800	96887399	DM_H3K27me3_cKO_DEseq2_up_712|5.32|2.98|2.34	0	.
chr17	81254200	81257399	DM_H3K27me3_cKO_DEseq2_up_713|4.77|1.32|3.46	0	.
chr2	128238800	128250199	DM_H3K27me3_cKO_DEseq2_up_714|6.78|5.54|1.24	0	.
chr8	78724400	78729599	DM_H3K27me3_cKO_DEseq2_up_715|5.55|3.45|2.1	0	.
chr7	36608600	36622599	DM_H3K27me3_cKO_DEseq2_up_716|6.78|5.49|1.29	0	.
chr6	38953000	38960599	DM_H3K27me3_cKO_DEseq2_up_717|6.03|4.45|1.58	0	.
chr9	111853400	111857199	DM_H3K27me3_cKO_DEseq2_up_718|5.11|2.32|2.79	0	.
chr2	153023800	153028199	DM_H3K27me3_cKO_DEseq2_up_719|5.22|2.9|2.32	0	.
chr13	34659400	34674999	DM_H3K27me3_cKO_DEseq2_up_720|7.21|5.99|1.21	0	.
chr1	163288600	163294799	DM_H3K27me3_cKO_DEseq2_up_721|5.62|3.74|1.87	0	.
chr15	97656600	97660999	DM_H3K27me3_cKO_DEseq2_up_722|5.4|3.31|2.09	0	.
chr14	20062400	20066799	DM_H3K27me3_cKO_DEseq2_up_723|5.16|2.58|2.58	0	.
chr1	23584200	23586799	DM_H3K27me3_cKO_DEseq2_up_724|4.69|0.99|3.7	0	.
chr14	62453600	62457199	DM_H3K27me3_cKO_DEseq2_up_725|5.24|2.98|2.26	0	.
chr16	13548000	13562799	DM_H3K27me3_cKO_DEseq2_up_726|7.27|6.2|1.07	0	.
chr8	95967000	95976999	DM_H3K27me3_cKO_DEseq2_up_727|6.54|5.25|1.29	0	.
chr5	74890400	74896199	DM_H3K27me3_cKO_DEseq2_up_728|5.79|4.11|1.67	0	.
chr8	87693800	87707999	DM_H3K27me3_cKO_DEseq2_up_729|7.34|6.3|1.04	0	.
chr5	106204000	106214399	DM_H3K27me3_cKO_DEseq2_up_730|7.05|5.97|1.08	0	.
chr12	15722200	15724999	DM_H3K27me3_cKO_DEseq2_up_731|4.63|-0.01|4.65	0	.
chr7	26645200	26647999	DM_H3K27me3_cKO_DEseq2_up_732|4.63|-0.01|4.65	0	.
chr5	120184600	120189599	DM_H3K27me3_cKO_DEseq2_up_733|5.53|3.44|2.1	0	.
chr7	80386800	80388599	DM_H3K27me3_cKO_DEseq2_up_734|4.92|1.78|3.14	0	.
chr9	91601800	91604399	DM_H3K27me3_cKO_DEseq2_up_735|4.63|0.57|4.07	0	.
chr2	179660600	179675799	DM_H3K27me3_cKO_DEseq2_up_736|7.5|6.56|0.95	0	.
chr8	53213600	53217999	DM_H3K27me3_cKO_DEseq2_up_737|5.53|3.51|2.01	0	.
chr17	11813600	11821799	DM_H3K27me3_cKO_DEseq2_up_738|6.04|4.44|1.6	0	.
chr7	36129000	36137999	DM_H3K27me3_cKO_DEseq2_up_739|6.87|5.74|1.13	0	.
chr11	116099200	116104599	DM_H3K27me3_cKO_DEseq2_up_740|5.82|4.11|1.71	0	.
chr13	60170800	60179199	DM_H3K27me3_cKO_DEseq2_up_741|6.79|5.48|1.31	0	.
chr15	87798200	87803999	DM_H3K27me3_cKO_DEseq2_up_742|5.48|3.51|1.97	0	.
chr3	66288400	66298799	DM_H3K27me3_cKO_DEseq2_up_743|6.76|5.56|1.21	0	.
chr13	73213400	73230999	DM_H3K27me3_cKO_DEseq2_up_744|7.11|6.05|1.06	0	.
chr18	80527600	80539599	DM_H3K27me3_cKO_DEseq2_up_745|7.02|5.88|1.14	0	.
chr8	108884400	108891999	DM_H3K27me3_cKO_DEseq2_up_746|6.39|4.94|1.45	0	.
chr11	95246200	95257999	DM_H3K27me3_cKO_DEseq2_up_747|7.11|6.01|1.1	0	.
chr4	11607800	11612999	DM_H3K27me3_cKO_DEseq2_up_748|5.46|3.37|2.09	0	.
chr2	118116800	118130599	DM_H3K27me3_cKO_DEseq2_up_749|7.03|5.89|1.13	0	.
chr6	53583200	53590799	DM_H3K27me3_cKO_DEseq2_up_750|6.19|4.71|1.48	0	.
chr10	81579000	81583599	DM_H3K27me3_cKO_DEseq2_up_751|5.67|3.89|1.78	0	.
chr8	105450400	105453199	DM_H3K27me3_cKO_DEseq2_up_752|5.03|2.44|2.59	0	.
chr2	139697600	139703599	DM_H3K27me3_cKO_DEseq2_up_753|5.61|3.58|2.03	0	.
chr9	122099600	122104599	DM_H3K27me3_cKO_DEseq2_up_754|5.36|3.23|2.13	0	.
chr11	115999400	116002999	DM_H3K27me3_cKO_DEseq2_up_755|5.61|3.74|1.86	0	.
chr4	104215200	104218999	DM_H3K27me3_cKO_DEseq2_up_756|5.1|2.45|2.65	0	.
chr8	70889400	70894799	DM_H3K27me3_cKO_DEseq2_up_757|6.27|4.87|1.4	0	.
chr1	156778200	156784399	DM_H3K27me3_cKO_DEseq2_up_758|6.06|4.48|1.58	0	.
chr1	188191600	188197799	DM_H3K27me3_cKO_DEseq2_up_759|5.92|4.27|1.65	0	.
chr15	96872400	96876799	DM_H3K27me3_cKO_DEseq2_up_760|5.25|2.9|2.35	0	.
chr11	100801200	100838199	DM_H3K27me3_cKO_DEseq2_up_761|8.5|7.66|0.83	0	.
chr5	151578400	151584399	DM_H3K27me3_cKO_DEseq2_up_762|5.81|4.11|1.7	0	.
chr11	114639200	114643399	DM_H3K27me3_cKO_DEseq2_up_763|5.31|2.9|2.41	0	.
chr14	24525800	24528399	DM_H3K27me3_cKO_DEseq2_up_764|4.9|1.8|3.1	0	.
chr10	56688400	56691799	DM_H3K27me3_cKO_DEseq2_up_765|4.83|1.57|3.26	0	.
chr5	142683000	142690799	DM_H3K27me3_cKO_DEseq2_up_766|6.36|4.96|1.4	0	.
chr8	107983200	107997599	DM_H3K27me3_cKO_DEseq2_up_767|7.24|6.22|1.01	0	.
chr13	37964400	37969199	DM_H3K27me3_cKO_DEseq2_up_768|5.32|3.07|2.25	0	.
chr9	46387400	46390599	DM_H3K27me3_cKO_DEseq2_up_769|4.89|1.99|2.91	0	.
chr14	79849400	79856399	DM_H3K27me3_cKO_DEseq2_up_770|6.4|5.03|1.37	0	.
chr10	51869000	51875999	DM_H3K27me3_cKO_DEseq2_up_771|5.86|4.23|1.63	0	.
chr5	114423800	114427199	DM_H3K27me3_cKO_DEseq2_up_772|5.3|3.15|2.15	0	.
chr4	118514600	118520999	DM_H3K27me3_cKO_DEseq2_up_773|6.49|5.2|1.29	0	.
chr4	148168600	148173599	DM_H3K27me3_cKO_DEseq2_up_774|5.74|4.03|1.72	0	.
chr2	64614200	64618999	DM_H3K27me3_cKO_DEseq2_up_775|5.68|3.89|1.8	0	.
chr4	152857200	152859799	DM_H3K27me3_cKO_DEseq2_up_776|4.83|1.56|3.27	0	.
chr15	58598600	58607199	DM_H3K27me3_cKO_DEseq2_up_777|6.18|4.77|1.42	0	.
chr1	71885600	71900799	DM_H3K27me3_cKO_DEseq2_up_778|7.31|6.31|1	0	.
chr3	150151400	150154399	DM_H3K27me3_cKO_DEseq2_up_779|4.85|1.79|3.06	0	.
chr11	95978800	95984999	DM_H3K27me3_cKO_DEseq2_up_780|5.64|3.56|2.08	0	.
chr16	22295600	22301799	DM_H3K27me3_cKO_DEseq2_up_781|5.65|3.84|1.81	0	.
chr2	157696200	157698999	DM_H3K27me3_cKO_DEseq2_up_782|5.17|2.69|2.48	0	.
chr13	8029600	8037399	DM_H3K27me3_cKO_DEseq2_up_783|6.02|4.34|1.69	0	.
chr1	183187400	183193799	DM_H3K27me3_cKO_DEseq2_up_784|5.78|3.99|1.79	0	.
chr1	138782600	138788799	DM_H3K27me3_cKO_DEseq2_up_785|6.35|5.01|1.34	0	.
chr16	18604000	18614999	DM_H3K27me3_cKO_DEseq2_up_786|6.66|5.32|1.34	0	.
chr7	135753000	135760599	DM_H3K27me3_cKO_DEseq2_up_787|6.3|4.84|1.46	0	.
chr6	103256600	103262599	DM_H3K27me3_cKO_DEseq2_up_788|5.67|3.84|1.82	0	.
chr13	53805600	53809399	DM_H3K27me3_cKO_DEseq2_up_789|5.64|3.79|1.85	0	.
chr6	136889800	136912599	DM_H3K27me3_cKO_DEseq2_up_790|7.91|6.95|0.95	0	.
chr3	74287400	74290999	DM_H3K27me3_cKO_DEseq2_up_791|4.83|1.79|3.03	0	.
chr9	74924800	74930399	DM_H3K27me3_cKO_DEseq2_up_792|5.88|4.27|1.61	0	.
chr2	81039000	81044599	DM_H3K27me3_cKO_DEseq2_up_793|5.49|3.57|1.92	0	.
chr3	8876200	8879399	DM_H3K27me3_cKO_DEseq2_up_794|4.93|2.16|2.78	0	.
chr11	69245800	69248799	DM_H3K27me3_cKO_DEseq2_up_795|4.9|1.98|2.93	0	.
chr11	102460400	102463399	DM_H3K27me3_cKO_DEseq2_up_796|4.63|0.58|4.05	0	.
chr11	79716200	79720999	DM_H3K27me3_cKO_DEseq2_up_797|5.47|3.44|2.02	0	.
chr17	3636600	3646599	DM_H3K27me3_cKO_DEseq2_up_798|6.45|5.12|1.34	0	.
chr17	48004200	48009399	DM_H3K27me3_cKO_DEseq2_up_799|5.66|3.73|1.92	0	.
chr14	43327600	43334799	DM_H3K27me3_cKO_DEseq2_up_800|6.4|5.05|1.35	0	.
chr14	99347600	99350599	DM_H3K27me3_cKO_DEseq2_up_801|4.95|1.97|2.97	0	.
chr8	11709400	11712599	DM_H3K27me3_cKO_DEseq2_up_802|4.77|1.3|3.47	0	.
chr18	81567000	81604399	DM_H3K27me3_cKO_DEseq2_up_803|8.56|7.68|0.88	0	.
chr4	154534800	154610599	DM_H3K27me3_cKO_DEseq2_up_804|10.15|9.19|0.96	0	.
chr10	116328800	116331399	DM_H3K27me3_cKO_DEseq2_up_805|4.63|-0.01|4.65	0	.
chr5	114874600	114879999	DM_H3K27me3_cKO_DEseq2_up_806|5.91|4.07|1.83	0	.
chr6	137979000	137988399	DM_H3K27me3_cKO_DEseq2_up_807|6.49|5.07|1.42	0	.
chr2	39318000	39321799	DM_H3K27me3_cKO_DEseq2_up_808|5.13|2.69|2.44	0	.
chr6	72761200	72770399	DM_H3K27me3_cKO_DEseq2_up_809|6.78|5.64|1.14	0	.
chr6	133319800	133324599	DM_H3K27me3_cKO_DEseq2_up_810|5.19|2.9|2.3	0	.
chr9	63179600	63189199	DM_H3K27me3_cKO_DEseq2_up_811|6.55|5.19|1.36	0	.
chr6	137504600	137520599	DM_H3K27me3_cKO_DEseq2_up_812|7.22|6.09|1.13	0	.
chr17	45870600	45876399	DM_H3K27me3_cKO_DEseq2_up_813|6.05|4.57|1.48	0	.
chr15	97150200	97156199	DM_H3K27me3_cKO_DEseq2_up_814|5.72|3.98|1.73	0	.
chr8	31293200	31299799	DM_H3K27me3_cKO_DEseq2_up_815|5.81|4.16|1.65	0	.
chr9	47397600	47413599	DM_H3K27me3_cKO_DEseq2_up_816|7.22|6.16|1.06	0	.
chr2	37310200	37320199	DM_H3K27me3_cKO_DEseq2_up_817|6.39|5.03|1.36	0	.
chr5	100942400	100959399	DM_H3K27me3_cKO_DEseq2_up_818|7.47|6.51|0.96	0	.
chr1	113392600	113397599	DM_H3K27me3_cKO_DEseq2_up_819|5.33|3.23|2.1	0	.
chr11	112810800	112818999	DM_H3K27me3_cKO_DEseq2_up_820|6.29|4.89|1.39	0	.
chr8	36033800	36037799	DM_H3K27me3_cKO_DEseq2_up_821|5.02|2.45|2.58	0	.
chr8	71819400	71855599	DM_H3K27me3_cKO_DEseq2_up_822|9.35|8.51|0.83	0	.
chr10	102545400	102548599	DM_H3K27me3_cKO_DEseq2_up_823|4.98|2.31|2.67	0	.
chr12	112387600	112408599	DM_H3K27me3_cKO_DEseq2_up_824|7.57|6.58|0.99	0	.
chr13	73991600	73993999	DM_H3K27me3_cKO_DEseq2_up_825|4.6|-0.01|4.61	0	.
chr5	147122400	147129399	DM_H3K27me3_cKO_DEseq2_up_826|6.22|4.74|1.47	0	.
chr15	19533600	19536399	DM_H3K27me3_cKO_DEseq2_up_827|4.59|-0.01|4.61	0	.
chr17	54764400	54767199	DM_H3K27me3_cKO_DEseq2_up_828|4.62|0.57|4.06	0	.
chr16	76537800	76541399	DM_H3K27me3_cKO_DEseq2_up_829|5.23|2.98|2.25	0	.
chr3	34833800	34842999	DM_H3K27me3_cKO_DEseq2_up_830|6.74|5.58|1.15	0	.
chr13	48256600	48260799	DM_H3K27me3_cKO_DEseq2_up_831|5.44|3.38|2.07	0	.
chr2	56750400	56754399	DM_H3K27me3_cKO_DEseq2_up_832|5.16|2.79|2.37	0	.
chr9	120679600	120682999	DM_H3K27me3_cKO_DEseq2_up_833|5.11|2.69|2.42	0	.
chr18	43408000	43411999	DM_H3K27me3_cKO_DEseq2_up_834|5.08|2.58|2.5	0	.
chr10	126026000	126030399	DM_H3K27me3_cKO_DEseq2_up_835|5.54|3.68|1.85	0	.
chr12	97421000	97425599	DM_H3K27me3_cKO_DEseq2_up_836|5.25|2.9|2.35	0	.
chr5	147675400	147687599	DM_H3K27me3_cKO_DEseq2_up_837|6.8|5.51|1.29	0	.
chr10	18466800	18474799	DM_H3K27me3_cKO_DEseq2_up_838|6.85|5.71|1.14	0	.
chr5	72399000	72404199	DM_H3K27me3_cKO_DEseq2_up_839|5.56|3.69|1.87	0	.
chr8	117947400	117969799	DM_H3K27me3_cKO_DEseq2_up_840|7.88|7.01|0.87	0	.
chr8	114356000	114367599	DM_H3K27me3_cKO_DEseq2_up_841|7.06|5.95|1.1	0	.
chr2	33567400	33587399	DM_H3K27me3_cKO_DEseq2_up_842|7.73|6.79|0.94	0	.
chr3	34799000	34802599	DM_H3K27me3_cKO_DEseq2_up_843|4.99|2.3|2.68	0	.
chr5	106577000	106581799	DM_H3K27me3_cKO_DEseq2_up_844|5.86|4.27|1.59	0	.
chr8	10878000	10880599	DM_H3K27me3_cKO_DEseq2_up_845|5.06|2.57|2.49	0	.
chr1	56993400	56997799	DM_H3K27me3_cKO_DEseq2_up_846|5.06|2.57|2.49	0	.
chr13	53519800	53523399	DM_H3K27me3_cKO_DEseq2_up_847|5.5|3.37|2.14	0	.
chr4	8414400	8424399	DM_H3K27me3_cKO_DEseq2_up_848|6.68|5.36|1.32	0	.
chr13	78167000	78186799	DM_H3K27me3_cKO_DEseq2_up_849|8.03|7.1|0.93	0	.
chr8	125710600	125720799	DM_H3K27me3_cKO_DEseq2_up_850|6.66|5.48|1.18	0	.
chr15	97234000	97241599	DM_H3K27me3_cKO_DEseq2_up_851|6.03|4.54|1.49	0	.
chr9	61487200	61516399	DM_H3K27me3_cKO_DEseq2_up_852|8.38|7.49|0.89	0	.
chr10	42966000	42972199	DM_H3K27me3_cKO_DEseq2_up_853|5.68|3.94|1.74	0	.
chr12	99297800	99300799	DM_H3K27me3_cKO_DEseq2_up_854|4.85|1.8|3.05	0	.
chr2	85129200	85132599	DM_H3K27me3_cKO_DEseq2_up_855|5.16|2.79|2.37	0	.
chr17	45930600	45938399	DM_H3K27me3_cKO_DEseq2_up_856|6.37|4.96|1.41	0	.
chr10	58646400	58652799	DM_H3K27me3_cKO_DEseq2_up_857|6.23|4.8|1.43	0	.
chr17	19717800	19723199	DM_H3K27me3_cKO_DEseq2_up_858|5.44|3.44|1.99	0	.
chr6	138563400	138571399	DM_H3K27me3_cKO_DEseq2_up_859|6.01|4.38|1.62	0	.
chr9	118185400	118190799	DM_H3K27me3_cKO_DEseq2_up_860|5.87|4.27|1.6	0	.
chr5	24201400	24206999	DM_H3K27me3_cKO_DEseq2_up_861|5.67|3.89|1.78	0	.
chr3	34504400	34512199	DM_H3K27me3_cKO_DEseq2_up_862|6.37|5.01|1.36	0	.
chr2	144156600	144160999	DM_H3K27me3_cKO_DEseq2_up_863|5.85|4.2|1.65	0	.
chr2	3886200	3892399	DM_H3K27me3_cKO_DEseq2_up_864|6.29|4.96|1.33	0	.
chr4	104793400	104796199	DM_H3K27me3_cKO_DEseq2_up_865|4.79|1.58|3.21	0	.
chr4	45496000	45499799	DM_H3K27me3_cKO_DEseq2_up_866|5.47|3.32|2.15	0	.
chr7	68478200	68484199	DM_H3K27me3_cKO_DEseq2_up_867|6.25|4.89|1.36	0	.
chr11	88420400	88441599	DM_H3K27me3_cKO_DEseq2_up_868|7.76|6.83|0.93	0	.
chr2	72321200	72327999	DM_H3K27me3_cKO_DEseq2_up_869|5.97|4.34|1.63	0	.
chr8	6629200	6633199	DM_H3K27me3_cKO_DEseq2_up_870|5.09|2.69|2.41	0	.
chr9	12393200	12401799	DM_H3K27me3_cKO_DEseq2_up_871|6.25|4.89|1.36	0	.
chr1	118969000	118971599	DM_H3K27me3_cKO_DEseq2_up_872|4.64|0.99|3.65	0	.
chr16	93491800	93494799	DM_H3K27me3_cKO_DEseq2_up_873|4.72|1.32|3.4	0	.
chr12	112004800	112009199	DM_H3K27me3_cKO_DEseq2_up_874|5.65|3.89|1.76	0	.
chr14	8264200	8266599	DM_H3K27me3_cKO_DEseq2_up_875|4.58|-0.01|4.59	0	.
chr6	50999600	51007799	DM_H3K27me3_cKO_DEseq2_up_876|6.28|4.94|1.34	0	.
chr7	143384000	143393799	DM_H3K27me3_cKO_DEseq2_up_877|6.59|5.39|1.2	0	.
chr15	59031400	59034199	DM_H3K27me3_cKO_DEseq2_up_878|5.17|2.79|2.38	0	.
chr2	167771800	167773799	DM_H3K27me3_cKO_DEseq2_up_879|4.57|-0.01|4.59	0	.
chr11	100787600	100794399	DM_H3K27me3_cKO_DEseq2_up_880|5.81|4.11|1.7	0	.
chr5	103737200	103742199	DM_H3K27me3_cKO_DEseq2_up_881|5.67|3.9|1.77	0	.
chr8	92932400	92937999	DM_H3K27me3_cKO_DEseq2_up_882|5.42|3.31|2.11	0	.
chr8	115007600	115021999	DM_H3K27me3_cKO_DEseq2_up_883|7.47|6.5|0.96	0	.
chr17	53612800	53616399	DM_H3K27me3_cKO_DEseq2_up_884|5.19|2.89|2.3	0	.
chr11	21851200	21857799	DM_H3K27me3_cKO_DEseq2_up_885|5.63|3.85|1.79	0	.
chr8	115071000	115074999	DM_H3K27me3_cKO_DEseq2_up_886|5.33|3.23|2.09	0	.
chr11	71862200	71872799	DM_H3K27me3_cKO_DEseq2_up_887|6.74|5.55|1.18	0	.
chr14	63682000	63690799	DM_H3K27me3_cKO_DEseq2_up_888|6.54|5.29|1.25	0	.
chr14	48510200	48515199	DM_H3K27me3_cKO_DEseq2_up_889|5.83|4.23|1.6	0	.
chr19	51907000	51911599	DM_H3K27me3_cKO_DEseq2_up_890|5.14|2.79|2.35	0	.
chr5	149836000	149848799	DM_H3K27me3_cKO_DEseq2_up_891|7.04|6|1.04	0	.
chr4	53174400	53180199	DM_H3K27me3_cKO_DEseq2_up_892|6.01|4.48|1.53	0	.
chr1	104707800	104713799	DM_H3K27me3_cKO_DEseq2_up_893|5.45|3.37|2.08	0	.
chr1	112465800	112470599	DM_H3K27me3_cKO_DEseq2_up_894|5.35|3.08|2.27	0	.
chr9	34663600	34670599	DM_H3K27me3_cKO_DEseq2_up_895|6.11|4.66|1.46	0	.
chr2	28937400	28951399	DM_H3K27me3_cKO_DEseq2_up_896|7.41|6.47|0.94	0	.
chr19	58919000	58927199	DM_H3K27me3_cKO_DEseq2_up_897|6.08|4.54|1.53	0	.
chr5	103384000	103388399	DM_H3K27me3_cKO_DEseq2_up_898|5.27|3.08|2.2	0	.
chr1	62424000	62443199	DM_H3K27me3_cKO_DEseq2_up_899|7.58|6.61|0.96	0	.
chr2	126086200	126088399	DM_H3K27me3_cKO_DEseq2_up_900|4.6|-0.01|4.61	0	.
chr4	117502200	117511199	DM_H3K27me3_cKO_DEseq2_up_901|6.67|5.48|1.19	0	.
chr4	124982400	124996799	DM_H3K27me3_cKO_DEseq2_up_902|7.59|6.61|0.98	0	.
chr9	114348800	114351799	DM_H3K27me3_cKO_DEseq2_up_903|4.77|1.56|3.21	0	.
chr17	47433800	47444999	DM_H3K27me3_cKO_DEseq2_up_904|6.92|5.82|1.1	0	.
chr1	156744000	156749599	DM_H3K27me3_cKO_DEseq2_up_905|5.8|4.15|1.65	0	.
chr3	52631000	52646999	DM_H3K27me3_cKO_DEseq2_up_906|7.5|6.51|0.99	0	.
chr2	165225800	165227999	DM_H3K27me3_cKO_DEseq2_up_907|4.58|0.57|4.01	0	.
chr10	121224200	121230999	DM_H3K27me3_cKO_DEseq2_up_908|5.7|3.85|1.85	0	.
chr9	61893800	61902999	DM_H3K27me3_cKO_DEseq2_up_909|6.51|5.21|1.3	0	.
chr2	171092600	171102799	DM_H3K27me3_cKO_DEseq2_up_910|7|5.96|1.04	0	.
chr18	57467400	57471199	DM_H3K27me3_cKO_DEseq2_up_911|5.26|2.99|2.27	0	.
chr11	68285000	68287399	DM_H3K27me3_cKO_DEseq2_up_912|4.81|1.8|3.01	0	.
chr6	144862800	144871399	DM_H3K27me3_cKO_DEseq2_up_913|6.13|4.71|1.42	0	.
chr6	22484400	22491599	DM_H3K27me3_cKO_DEseq2_up_914|6.38|5.1|1.29	0	.
chr11	95231200	95242599	DM_H3K27me3_cKO_DEseq2_up_915|6.73|5.48|1.25	0	.
chr13	116440400	116447199	DM_H3K27me3_cKO_DEseq2_up_916|6.19|4.74|1.45	0	.
chr7	129959600	129966999	DM_H3K27me3_cKO_DEseq2_up_917|6.24|4.82|1.42	0	.
chr8	30819000	30826399	DM_H3K27me3_cKO_DEseq2_up_918|6|4.34|1.66	0	.
chr4	153797600	153833999	DM_H3K27me3_cKO_DEseq2_up_919|8.53|7.71|0.83	0	.
chr11	88623400	88631199	DM_H3K27me3_cKO_DEseq2_up_920|6.27|4.86|1.41	0	.
chr17	88504800	88511599	DM_H3K27me3_cKO_DEseq2_up_921|6.2|4.68|1.51	0	.
chr15	11283800	11316799	DM_H3K27me3_cKO_DEseq2_up_922|8.37|7.54|0.83	0	.
chr7	46265800	46283599	DM_H3K27me3_cKO_DEseq2_up_923|7.28|6.22|1.06	0	.
chr2	152902200	152905799	DM_H3K27me3_cKO_DEseq2_up_924|4.99|2.44|2.55	0	.
chr10	61826400	61828799	DM_H3K27me3_cKO_DEseq2_up_925|4.63|0.58|4.05	0	.
chr1	18398000	18401599	DM_H3K27me3_cKO_DEseq2_up_926|4.7|1.3|3.4	0	.
chr7	17761600	17765599	DM_H3K27me3_cKO_DEseq2_up_927|5|2.17|2.83	0	.
chr18	84089400	84092799	DM_H3K27me3_cKO_DEseq2_up_928|5.08|2.58|2.51	0	.
chr7	129197800	129201999	DM_H3K27me3_cKO_DEseq2_up_929|5.4|3.44|1.95	0	.
chr8	8905800	8910999	DM_H3K27me3_cKO_DEseq2_up_930|5.6|3.74|1.87	0	.
chr2	179526800	179536199	DM_H3K27me3_cKO_DEseq2_up_931|6.81|5.69|1.13	0	.
chr12	73804400	73809199	DM_H3K27me3_cKO_DEseq2_up_932|5.58|3.74|1.84	0	.
chr11	84657200	84667799	DM_H3K27me3_cKO_DEseq2_up_933|6.82|5.59|1.23	0	.
chr2	128397600	128405999	DM_H3K27me3_cKO_DEseq2_up_934|6.32|4.96|1.36	0	.
chr16	32799000	32803399	DM_H3K27me3_cKO_DEseq2_up_935|5.45|3.51|1.93	0	.
chr5	102224000	102228199	DM_H3K27me3_cKO_DEseq2_up_936|5.53|3.69|1.84	0	.
chr4	147594200	147617799	DM_H3K27me3_cKO_DEseq2_up_937|7.99|7.08|0.91	0	.
chr12	67766800	67770599	DM_H3K27me3_cKO_DEseq2_up_938|4.99|2.44|2.54	0	.
chr2	33697200	33710399	DM_H3K27me3_cKO_DEseq2_up_939|7.52|6.59|0.93	0	.
chr6	97244200	97253599	DM_H3K27me3_cKO_DEseq2_up_940|6.46|5.2|1.27	0	.
chr1	184405800	184414199	DM_H3K27me3_cKO_DEseq2_up_941|6.28|4.92|1.36	0	.
chr1	189885000	189889199	DM_H3K27me3_cKO_DEseq2_up_942|5.24|3.08|2.17	0	.
chr2	169110800	169123399	DM_H3K27me3_cKO_DEseq2_up_943|6.95|5.86|1.09	0	.
chr1	68551600	68555199	DM_H3K27me3_cKO_DEseq2_up_944|4.79|1.79|3	0	.
chr12	71568600	71577599	DM_H3K27me3_cKO_DEseq2_up_945|6.54|5.31|1.23	0	.
chr7	37677200	37702199	DM_H3K27me3_cKO_DEseq2_up_946|8.03|7.15|0.88	0	.
chr4	151907200	151916399	DM_H3K27me3_cKO_DEseq2_up_947|6.57|5.36|1.21	0	.
chr3	52750400	52756799	DM_H3K27me3_cKO_DEseq2_up_948|6.13|4.71|1.42	0	.
chr7	78599400	78609199	DM_H3K27me3_cKO_DEseq2_up_949|6.28|4.96|1.32	0	.
chr10	61062800	61068399	DM_H3K27me3_cKO_DEseq2_up_950|5.97|4.44|1.53	0	.
chr9	85493000	85504799	DM_H3K27me3_cKO_DEseq2_up_951|6.66|5.49|1.17	0	.
chr11	55432200	55438599	DM_H3K27me3_cKO_DEseq2_up_952|5.67|3.94|1.73	0	.
chr7	77607400	77610599	DM_H3K27me3_cKO_DEseq2_up_953|4.98|2|2.98	0	.
chr12	73508600	73530399	DM_H3K27me3_cKO_DEseq2_up_954|8.05|7.15|0.89	0	.
chr7	113087600	113098199	DM_H3K27me3_cKO_DEseq2_up_955|6.62|5.43|1.19	0	.
chr19	9763800	9767599	DM_H3K27me3_cKO_DEseq2_up_956|5.15|2.89|2.26	0	.
chr14	118852400	118868599	DM_H3K27me3_cKO_DEseq2_up_957|7.7|6.8|0.9	0	.
chr1	91753000	91754799	DM_H3K27me3_cKO_DEseq2_up_958|4.71|1.3|3.42	0	.
chr8	90346000	90347799	DM_H3K27me3_cKO_DEseq2_up_959|4.54|-0.01|4.55	0	.
chr9	26338400	26340799	DM_H3K27me3_cKO_DEseq2_up_960|4.54|-0.01|4.55	0	.
chr10	60952000	60965599	DM_H3K27me3_cKO_DEseq2_up_961|6.86|5.66|1.19	0	.
chr7	130206400	130214399	DM_H3K27me3_cKO_DEseq2_up_962|6.23|4.84|1.39	0	.
chr10	116768800	116774999	DM_H3K27me3_cKO_DEseq2_up_963|6.36|5.07|1.29	0	.
chr12	79803000	79823399	DM_H3K27me3_cKO_DEseq2_up_964|8.11|7.29|0.82	0	.
chr17	79915600	79923999	DM_H3K27me3_cKO_DEseq2_up_965|6.49|5.22|1.28	0	.
chr9	72823400	72828799	DM_H3K27me3_cKO_DEseq2_up_966|5.85|4.24|1.62	0	.
chr11	88547200	88551799	DM_H3K27me3_cKO_DEseq2_up_967|5.78|3.93|1.85	0	.
chr19	16474400	16477599	DM_H3K27me3_cKO_DEseq2_up_968|5.14|2.8|2.34	0	.
chr18	81526600	81534999	DM_H3K27me3_cKO_DEseq2_up_969|6.52|5.29|1.23	0	.
chr14	118505600	118516199	DM_H3K27me3_cKO_DEseq2_up_970|6.76|5.54|1.22	0	.
chr5	99735600	99740599	DM_H3K27me3_cKO_DEseq2_up_971|5.71|3.84|1.87	0	.
chr9	61632600	61638999	DM_H3K27me3_cKO_DEseq2_up_972|6.35|5.03|1.32	0	.
chr7	35846800	35852399	DM_H3K27me3_cKO_DEseq2_up_973|5.4|3.44|1.96	0	.
chr13	46272000	46274799	DM_H3K27me3_cKO_DEseq2_up_974|4.61|0.98|3.63	0	.
chr18	66268000	66274199	DM_H3K27me3_cKO_DEseq2_up_975|5.79|4.11|1.68	0	.
chr2	179050600	179062999	DM_H3K27me3_cKO_DEseq2_up_976|6.96|5.89|1.07	0	.
chr13	53294400	53299799	DM_H3K27me3_cKO_DEseq2_up_977|5.83|4.24|1.6	0	.
chr13	43684600	43686999	DM_H3K27me3_cKO_DEseq2_up_978|4.55|-0.01|4.56	0	.
chr11	7189000	7203599	DM_H3K27me3_cKO_DEseq2_up_979|6.89|5.77|1.12	0	.
chr11	63729000	63731999	DM_H3K27me3_cKO_DEseq2_up_980|4.86|1.99|2.87	0	.
chr4	83717800	83722399	DM_H3K27me3_cKO_DEseq2_up_981|5.47|3.32|2.15	0	.
chr18	5481000	5492399	DM_H3K27me3_cKO_DEseq2_up_982|6.82|5.7|1.12	0	.
chr2	162898200	162910999	DM_H3K27me3_cKO_DEseq2_up_983|6.83|5.69|1.15	0	.
chr3	153823800	153828399	DM_H3K27me3_cKO_DEseq2_up_984|5.56|3.79|1.77	0	.
chr7	136861400	136867799	DM_H3K27me3_cKO_DEseq2_up_985|5.67|3.98|1.69	0	.
chr17	87798200	87800599	DM_H3K27me3_cKO_DEseq2_up_986|4.53|-0.01|4.55	0	.
chr7	135614000	135617999	DM_H3K27me3_cKO_DEseq2_up_987|5.06|2.56|2.5	0	.
chr15	97354000	97361799	DM_H3K27me3_cKO_DEseq2_up_988|5.81|4.16|1.65	0	.
chr14	79198800	79203999	DM_H3K27me3_cKO_DEseq2_up_989|5.79|4.11|1.68	0	.
chr9	102989200	102994399	DM_H3K27me3_cKO_DEseq2_up_990|5.56|3.69|1.87	0	.
chr5	126108200	126114599	DM_H3K27me3_cKO_DEseq2_up_991|5.58|3.79|1.79	0	.
chr13	71704600	71715999	DM_H3K27me3_cKO_DEseq2_up_992|6.8|5.7|1.11	0	.
chr7	37709000	37751399	DM_H3K27me3_cKO_DEseq2_up_993|8.99|8.2|0.8	0	.
chr1	179205600	179209399	DM_H3K27me3_cKO_DEseq2_up_994|5.05|2.3|2.76	0	.
chr14	48314800	48319199	DM_H3K27me3_cKO_DEseq2_up_995|5.56|3.68|1.87	0	.
chr2	93595600	93603799	DM_H3K27me3_cKO_DEseq2_up_996|6.1|4.63|1.47	0	.
chr1	184332000	184345599	DM_H3K27me3_cKO_DEseq2_up_997|6.91|5.82|1.09	0	.
chr15	101065200	101071399	DM_H3K27me3_cKO_DEseq2_up_998|5.93|4.31|1.62	0	.
chr1	118887800	118891999	DM_H3K27me3_cKO_DEseq2_up_999|5.52|3.63|1.89	0	.
chr5	35357400	35363199	DM_H3K27me3_cKO_DEseq2_up_1000|5.61|3.68|1.93	0	.
chr5	123379600	123382599	DM_H3K27me3_cKO_DEseq2_up_1001|5.26|3.15|2.1	0	.
chr4	151496600	151503799	DM_H3K27me3_cKO_DEseq2_up_1002|6.25|4.89|1.36	0	.
chr17	77171400	77176599	DM_H3K27me3_cKO_DEseq2_up_1003|5.43|3.51|1.91	0	.
chr11	115824000	115840999	DM_H3K27me3_cKO_DEseq2_up_1004|7.55|6.62|0.93	0	.
chr8	70499000	70502999	DM_H3K27me3_cKO_DEseq2_up_1005|5.49|3.63|1.86	0	.
chr4	148324600	148332399	DM_H3K27me3_cKO_DEseq2_up_1006|6.25|4.89|1.36	0	.
chr13	80146400	80149799	DM_H3K27me3_cKO_DEseq2_up_1007|5.05|2.44|2.61	0	.
chr6	28945400	28948999	DM_H3K27me3_cKO_DEseq2_up_1008|5.05|2.45|2.59	0	.
chr1	62575000	62583599	DM_H3K27me3_cKO_DEseq2_up_1009|6.16|4.74|1.42	0	.
chr1	163338000	163342599	DM_H3K27me3_cKO_DEseq2_up_1010|5.52|3.69|1.83	0	.
chr7	36286600	36289199	DM_H3K27me3_cKO_DEseq2_up_1011|4.73|1.58|3.16	0	.
chr14	22353200	22372599	DM_H3K27me3_cKO_DEseq2_up_1012|7.64|6.69|0.95	0	.
chr19	11619000	11622199	DM_H3K27me3_cKO_DEseq2_up_1013|4.72|1.58|3.14	0	.
chr3	147180400	147185999	DM_H3K27me3_cKO_DEseq2_up_1014|5.99|4.51|1.47	0	.
chr5	103927600	103933799	DM_H3K27me3_cKO_DEseq2_up_1015|5.83|4.23|1.59	0	.
chr1	67647200	67650999	DM_H3K27me3_cKO_DEseq2_up_1016|5.38|3.37|2.01	0	.
chr16	90096400	90100399	DM_H3K27me3_cKO_DEseq2_up_1017|4.97|2.44|2.53	0	.
chr8	48763600	48768999	DM_H3K27me3_cKO_DEseq2_up_1018|5.56|3.79|1.76	0	.
chr19	25398600	25403999	DM_H3K27me3_cKO_DEseq2_up_1019|6.29|4.96|1.32	0	.
chr17	29318400	29324799	DM_H3K27me3_cKO_DEseq2_up_1020|6.41|5.11|1.3	0	.
chr18	12072200	12075999	DM_H3K27me3_cKO_DEseq2_up_1021|5.04|2.3|2.74	0	.
chr1	172483600	172490599	DM_H3K27me3_cKO_DEseq2_up_1022|5.92|4.34|1.58	0	.
chr10	119681600	119691799	DM_H3K27me3_cKO_DEseq2_up_1023|6.36|5.07|1.29	0	.
chr1	136864400	136875399	DM_H3K27me3_cKO_DEseq2_up_1024|6.39|5.03|1.37	0	.
chr10	67381800	67386799	DM_H3K27me3_cKO_DEseq2_up_1025|6|4.54|1.46	0	.
chr11	114773000	114775599	DM_H3K27me3_cKO_DEseq2_up_1026|4.69|1.3|3.39	0	.
chr13	47235200	47243799	DM_H3K27me3_cKO_DEseq2_up_1027|6.27|4.84|1.42	0	.
chr10	56420600	56430399	DM_H3K27me3_cKO_DEseq2_up_1028|6.6|5.39|1.2	0	.
chr14	52314800	52318199	DM_H3K27me3_cKO_DEseq2_up_1029|4.84|1.8|3.04	0	.
chr11	10155200	10164999	DM_H3K27me3_cKO_DEseq2_up_1030|6.44|5.19|1.24	0	.
chr9	118851400	118858599	DM_H3K27me3_cKO_DEseq2_up_1031|6.14|4.77|1.37	0	.
chr1	121144800	121148199	DM_H3K27me3_cKO_DEseq2_up_1032|4.91|2.15|2.76	0	.
chr17	9403600	9409799	DM_H3K27me3_cKO_DEseq2_up_1033|5.91|4.34|1.57	0	.
chr8	78686800	78692599	DM_H3K27me3_cKO_DEseq2_up_1034|5.53|3.57|1.96	0	.
chr8	6912800	6915599	DM_H3K27me3_cKO_DEseq2_up_1035|4.6|0.99|3.61	0	.
chr6	52620200	52624399	DM_H3K27me3_cKO_DEseq2_up_1036|5.03|2.32|2.71	0	.
chr3	84654200	84659399	DM_H3K27me3_cKO_DEseq2_up_1037|5.85|4.19|1.66	0	.
chr16	94189400	94195199	DM_H3K27me3_cKO_DEseq2_up_1038|5.66|3.94|1.72	0	.
chr7	102102000	102108199	DM_H3K27me3_cKO_DEseq2_up_1039|5.84|4.19|1.65	0	.
chr7	54767400	54769999	DM_H3K27me3_cKO_DEseq2_up_1040|4.92|2.3|2.62	0	.
chr2	172288200	172294399	DM_H3K27me3_cKO_DEseq2_up_1041|5.92|4.16|1.76	0	.
chr15	37163600	37168999	DM_H3K27me3_cKO_DEseq2_up_1042|5.9|4.38|1.52	0	.
chr2	49907000	49912599	DM_H3K27me3_cKO_DEseq2_up_1043|5.83|4.27|1.56	0	.
chr15	23898000	23903799	DM_H3K27me3_cKO_DEseq2_up_1044|5.57|3.68|1.89	0	.
chr8	12165000	12182599	DM_H3K27me3_cKO_DEseq2_up_1045|7.54|6.52|1.02	0	.
chr4	151242800	151246799	DM_H3K27me3_cKO_DEseq2_up_1046|5.31|3.23|2.08	0	.
chr4	155652200	155654199	DM_H3K27me3_cKO_DEseq2_up_1047|4.6|0.98|3.62	0	.
chr10	4481000	4483599	DM_H3K27me3_cKO_DEseq2_up_1048|5.07|2.58|2.49	0	.
chr16	90408200	90412199	DM_H3K27me3_cKO_DEseq2_up_1049|5.14|2.79|2.35	0	.
chr5	8861600	8864399	DM_H3K27me3_cKO_DEseq2_up_1050|5.11|2.79|2.32	0	.
chr9	41358000	41363399	DM_H3K27me3_cKO_DEseq2_up_1051|5.53|3.69|1.84	0	.
chr5	75586600	75599199	DM_H3K27me3_cKO_DEseq2_up_1052|7.15|6.06|1.09	0	.
chr19	33009800	33012399	DM_H3K27me3_cKO_DEseq2_up_1053|4.51|-0.01|4.52	0	.
chr4	8760600	8790999	DM_H3K27me3_cKO_DEseq2_up_1054|8.38|7.56|0.82	0	.
chr6	22903800	22912199	DM_H3K27me3_cKO_DEseq2_up_1055|6.21|4.81|1.4	0	.
chr15	35263600	35267999	DM_H3K27me3_cKO_DEseq2_up_1056|5.53|3.69|1.85	0	.
chr11	96536600	96549399	DM_H3K27me3_cKO_DEseq2_up_1057|7.22|6.16|1.06	0	.
chr15	7081400	7096599	DM_H3K27me3_cKO_DEseq2_up_1058|7.18|6.19|0.98	0	.
chr3	144087400	144092599	DM_H3K27me3_cKO_DEseq2_up_1059|5.22|2.88|2.33	0	.
chr6	143610000	143617399	DM_H3K27me3_cKO_DEseq2_up_1060|5.87|4.34|1.53	0	.
chr11	44104400	44112999	DM_H3K27me3_cKO_DEseq2_up_1061|6.45|5.15|1.3	0	.
chr8	23294000	23300399	DM_H3K27me3_cKO_DEseq2_up_1062|5.67|3.85|1.82	0	.
chr10	122456200	122462599	DM_H3K27me3_cKO_DEseq2_up_1063|5.77|4.15|1.61	0	.
chr3	98046000	98057999	DM_H3K27me3_cKO_DEseq2_up_1064|7.03|5.94|1.09	0	.
chr15	26953000	26958599	DM_H3K27me3_cKO_DEseq2_up_1065|5.68|3.98|1.69	0	.
chr2	50964200	50968199	DM_H3K27me3_cKO_DEseq2_up_1066|5.52|3.58|1.94	0	.
chr15	97199000	97205999	DM_H3K27me3_cKO_DEseq2_up_1067|5.9|4.3|1.6	0	.
chr18	33868400	33878999	DM_H3K27me3_cKO_DEseq2_up_1068|6.72|5.51|1.21	0	.
chr4	14297200	14302399	DM_H3K27me3_cKO_DEseq2_up_1069|5.39|3.44|1.94	0	.
chr6	99744600	99754199	DM_H3K27me3_cKO_DEseq2_up_1070|6.5|5.27|1.23	0	.
chr10	55510600	55513399	DM_H3K27me3_cKO_DEseq2_up_1071|4.66|1.32|3.35	0	.
chr9	34958600	34973799	DM_H3K27me3_cKO_DEseq2_up_1072|7.36|6.42|0.94	0	.
chr15	87857200	87862999	DM_H3K27me3_cKO_DEseq2_up_1073|6.05|4.63|1.42	0	.
chr2	29564800	29571199	DM_H3K27me3_cKO_DEseq2_up_1074|5.72|4.07|1.64	0	.
chr7	132661000	132665599	DM_H3K27me3_cKO_DEseq2_up_1075|5.69|4.03|1.66	0	.
chr4	142944800	142952399	DM_H3K27me3_cKO_DEseq2_up_1076|6.24|4.77|1.47	0	.
chr1	17205200	17212999	DM_H3K27me3_cKO_DEseq2_up_1077|5.76|4.16|1.6	0	.
chr5	21167000	21177399	DM_H3K27me3_cKO_DEseq2_up_1078|6.7|5.54|1.16	0	.
chr10	84681200	84685599	DM_H3K27me3_cKO_DEseq2_up_1079|5.37|3.37|2	0	.
chr18	83529000	83543599	DM_H3K27me3_cKO_DEseq2_up_1080|7.51|6.57|0.94	0	.
chr11	8455200	8463199	DM_H3K27me3_cKO_DEseq2_up_1081|6.29|4.87|1.42	0	.
chr9	105831400	105836599	DM_H3K27me3_cKO_DEseq2_up_1082|5.5|3.44|2.06	0	.
chr1	87181800	87193599	DM_H3K27me3_cKO_DEseq2_up_1083|7.01|5.96|1.05	0	.
chr19	55625800	55627799	DM_H3K27me3_cKO_DEseq2_up_1084|4.51|-0.01|4.52	0	.
chr8	48736600	48748799	DM_H3K27me3_cKO_DEseq2_up_1085|7|5.97|1.03	0	.
chr3	103626800	103642399	DM_H3K27me3_cKO_DEseq2_up_1086|7.2|6.22|0.98	0	.
chr14	34552600	34556999	DM_H3K27me3_cKO_DEseq2_up_1087|5.27|3.15|2.11	0	.
chr14	65353600	65357999	DM_H3K27me3_cKO_DEseq2_up_1088|5.3|3.24|2.06	0	.
chr18	82311400	82321999	DM_H3K27me3_cKO_DEseq2_up_1089|6.41|5.14|1.27	0	.
chr5	30547200	30557199	DM_H3K27me3_cKO_DEseq2_up_1090|6.36|5.05|1.31	0	.
chr12	80018200	80026599	DM_H3K27me3_cKO_DEseq2_up_1091|6.66|5.48|1.18	0	.
chr1	88501600	88509399	DM_H3K27me3_cKO_DEseq2_up_1092|6.2|4.87|1.34	0	.
chr13	84968400	84970199	DM_H3K27me3_cKO_DEseq2_up_1093|4.49|-0.01|4.51	0	.
chr7	116495800	116500399	DM_H3K27me3_cKO_DEseq2_up_1094|5.18|2.98|2.19	0	.
chr11	88552600	88574599	DM_H3K27me3_cKO_DEseq2_up_1095|7.76|6.8|0.96	0	.
chr7	73087600	73093199	DM_H3K27me3_cKO_DEseq2_up_1096|5.53|3.63|1.9	0	.
chr4	24240000	24247999	DM_H3K27me3_cKO_DEseq2_up_1097|6.04|4.47|1.57	0	.
chr1	181860600	181866199	DM_H3K27me3_cKO_DEseq2_up_1098|5.66|3.85|1.81	0	.
chr13	40286600	40292999	DM_H3K27me3_cKO_DEseq2_up_1099|6.63|5.41|1.21	0	.
chr1	183634800	183645999	DM_H3K27me3_cKO_DEseq2_up_1100|6.61|5.29|1.32	0	.
chr1	70107400	70111399	DM_H3K27me3_cKO_DEseq2_up_1101|4.94|2.14|2.8	0	.
chr16	81142600	81147199	DM_H3K27me3_cKO_DEseq2_up_1102|5.06|2.69|2.37	0	.
chr9	61786800	61789599	DM_H3K27me3_cKO_DEseq2_up_1103|4.57|0.99|3.58	0	.
chr13	55785200	55789799	DM_H3K27me3_cKO_DEseq2_up_1104|5.3|3.23|2.08	0	.
chr11	90103600	90113399	DM_H3K27me3_cKO_DEseq2_up_1105|6.58|5.4|1.19	0	.
chr7	136392600	136399399	DM_H3K27me3_cKO_DEseq2_up_1106|6.17|4.82|1.35	0	.
chr1	185481800	185491199	DM_H3K27me3_cKO_DEseq2_up_1107|6.77|5.66|1.12	0	.
chr15	5932600	5935599	DM_H3K27me3_cKO_DEseq2_up_1108|4.91|2.31|2.6	0	.
chr3	18403800	18406399	DM_H3K27me3_cKO_DEseq2_up_1109|4.5|-0.01|4.51	0	.
chr5	119309200	119312999	DM_H3K27me3_cKO_DEseq2_up_1110|5.01|2.45|2.56	0	.
chr4	51765200	51770199	DM_H3K27me3_cKO_DEseq2_up_1111|5.24|3.15|2.08	0	.
chr18	84188600	84195599	DM_H3K27me3_cKO_DEseq2_up_1112|6.14|4.65|1.49	0	.
chr6	89067200	89074399	DM_H3K27me3_cKO_DEseq2_up_1113|6.14|4.66|1.48	0	.
chr12	53557000	53563399	DM_H3K27me3_cKO_DEseq2_up_1114|6.16|4.79|1.37	0	.
chr8	107812800	107827199	DM_H3K27me3_cKO_DEseq2_up_1115|7.54|6.56|0.98	0	.
chr5	150014000	150022999	DM_H3K27me3_cKO_DEseq2_up_1116|6.74|5.6|1.14	0	.
chr2	17847800	17870799	DM_H3K27me3_cKO_DEseq2_up_1117|8.17|7.33|0.84	0	.
chr10	96344800	96347199	DM_H3K27me3_cKO_DEseq2_up_1118|4.68|1.57|3.11	0	.
chr14	122187200	122190599	DM_H3K27me3_cKO_DEseq2_up_1119|5.04|2.68|2.36	0	.
chr6	31822000	31824799	DM_H3K27me3_cKO_DEseq2_up_1120|5|2.57|2.43	0	.
chr15	55773600	55781799	DM_H3K27me3_cKO_DEseq2_up_1121|6.56|5.34|1.22	0	.
chr7	26076600	26084799	DM_H3K27me3_cKO_DEseq2_up_1122|5.89|4.37|1.52	0	.
chr5	112876200	112879399	DM_H3K27me3_cKO_DEseq2_up_1123|4.9|2.16|2.74	0	.
chr5	97188600	97198599	DM_H3K27me3_cKO_DEseq2_up_1124|6.51|5.33|1.19	0	.
chr5	106510400	106569599	DM_H3K27me3_cKO_DEseq2_up_1125|9.63|8.85|0.77	0	.
chr8	80197200	80201399	DM_H3K27me3_cKO_DEseq2_up_1126|5.34|3.38|1.96	0	.
chr6	144873200	144885999	DM_H3K27me3_cKO_DEseq2_up_1127|6.97|5.86|1.11	0	.
chr10	23412000	23417199	DM_H3K27me3_cKO_DEseq2_up_1128|5.67|3.98|1.68	0	.
chr2	165085200	165107199	DM_H3K27me3_cKO_DEseq2_up_1129|7.97|7.07|0.89	0	.
chr14	25314800	25321999	DM_H3K27me3_cKO_DEseq2_up_1130|6.06|4.57|1.49	0	.
chr2	166213200	166221199	DM_H3K27me3_cKO_DEseq2_up_1131|6.45|5.22|1.24	0	.
chr1	165571200	165579199	DM_H3K27me3_cKO_DEseq2_up_1132|6.12|4.58|1.54	0	.
chr14	25119200	25128999	DM_H3K27me3_cKO_DEseq2_up_1133|6.62|5.46|1.16	0	.
chr5	37022400	37025599	DM_H3K27me3_cKO_DEseq2_up_1134|5.19|3.07|2.12	0	.
chr6	133803000	133805399	DM_H3K27me3_cKO_DEseq2_up_1135|4.8|1.8|3	0	.
chr13	94134600	94138199	DM_H3K27me3_cKO_DEseq2_up_1136|4.9|2.15|2.75	0	.
chr10	13105400	13119199	DM_H3K27me3_cKO_DEseq2_up_1137|7.39|6.34|1.05	0	.
chr6	51437000	51440199	DM_H3K27me3_cKO_DEseq2_up_1138|4.77|1.79|2.98	0	.
chr4	90590800	90594599	DM_H3K27me3_cKO_DEseq2_up_1139|5.17|2.9|2.27	0	.
chr2	75447400	75454999	DM_H3K27me3_cKO_DEseq2_up_1140|5.8|4.16|1.64	0	.
chr2	172106400	172118799	DM_H3K27me3_cKO_DEseq2_up_1141|6.84|5.68|1.16	0	.
chr4	84520200	84531399	DM_H3K27me3_cKO_DEseq2_up_1142|7.16|6.14|1.02	0	.
chr17	27035200	27037199	DM_H3K27me3_cKO_DEseq2_up_1143|4.5|-0.01|4.51	0	.
chr4	15153200	15157399	DM_H3K27me3_cKO_DEseq2_up_1144|5.14|2.79|2.35	0	.
chr5	102229600	102253199	DM_H3K27me3_cKO_DEseq2_up_1145|7.91|7.01|0.9	0	.
chr12	107999400	108001799	DM_H3K27me3_cKO_DEseq2_up_1146|4.5|-0.01|4.51	0	.
chr18	47524400	47543799	DM_H3K27me3_cKO_DEseq2_up_1147|7.48|6.52|0.96	0	.
chr7	136014200	136037799	DM_H3K27me3_cKO_DEseq2_up_1148|7.89|7.05|0.84	0	.
chr6	141736600	141740799	DM_H3K27me3_cKO_DEseq2_up_1149|5.12|2.89|2.22	0	.
chr14	72937200	72943599	DM_H3K27me3_cKO_DEseq2_up_1150|5.75|4.15|1.6	0	.
chr5	44084400	44087999	DM_H3K27me3_cKO_DEseq2_up_1151|5.08|2.79|2.29	0	.
chr8	92579600	92584799	DM_H3K27me3_cKO_DEseq2_up_1152|5.48|3.63|1.85	0	.
chr14	28526200	28534199	DM_H3K27me3_cKO_DEseq2_up_1153|6.25|4.94|1.31	0	.
chr6	50835400	50850399	DM_H3K27me3_cKO_DEseq2_up_1154|7.31|6.34|0.96	0	.
chr2	172271800	172278999	DM_H3K27me3_cKO_DEseq2_up_1155|6.03|4.54|1.49	0	.
chr19	44789400	44809799	DM_H3K27me3_cKO_DEseq2_up_1156|8.15|7.32|0.83	0	.
chr18	76603800	76608199	DM_H3K27me3_cKO_DEseq2_up_1157|5.66|3.93|1.73	0	.
chr11	35550200	35561199	DM_H3K27me3_cKO_DEseq2_up_1158|6.62|5.41|1.21	0	.
chr4	99474000	99477399	DM_H3K27me3_cKO_DEseq2_up_1159|5.57|3.84|1.73	0	.
chr14	118541800	118546999	DM_H3K27me3_cKO_DEseq2_up_1160|5.87|4.27|1.6	0	.
chr15	9294000	9311599	DM_H3K27me3_cKO_DEseq2_up_1161|7.59|6.63|0.97	0	.
chr5	141428000	141433999	DM_H3K27me3_cKO_DEseq2_up_1162|5.76|4.16|1.61	0	.
chr8	88896800	88921599	DM_H3K27me3_cKO_DEseq2_up_1163|7.97|7.08|0.88	0	.
chr16	23521400	23526399	DM_H3K27me3_cKO_DEseq2_up_1164|5.52|3.58|1.94	0	.
chr17	79052600	79060399	DM_H3K27me3_cKO_DEseq2_up_1165|6.37|5.03|1.34	0	.
chr18	83103800	83111199	DM_H3K27me3_cKO_DEseq2_up_1166|6.12|4.65|1.47	0	.
chr10	94261200	94275199	DM_H3K27me3_cKO_DEseq2_up_1167|7.01|5.84|1.16	0	.
chr15	83980000	83985199	DM_H3K27me3_cKO_DEseq2_up_1168|5.45|3.63|1.82	0	.
chr11	45346600	45349399	DM_H3K27me3_cKO_DEseq2_up_1169|4.64|1.32|3.32	0	.
chr9	46829200	46835199	DM_H3K27me3_cKO_DEseq2_up_1170|5.59|3.69|1.9	0	.
chr1	100877200	100879599	DM_H3K27me3_cKO_DEseq2_up_1171|4.69|1.58|3.11	0	.
chr1	175994200	176001199	DM_H3K27me3_cKO_DEseq2_up_1172|5.88|4.38|1.5	0	.
chr4	124631200	124640799	DM_H3K27me3_cKO_DEseq2_up_1173|6.63|5.46|1.17	0	.
chr16	78456000	78461199	DM_H3K27me3_cKO_DEseq2_up_1174|5.91|4.24|1.68	0	.
chr12	106540000	106544399	DM_H3K27me3_cKO_DEseq2_up_1175|5.47|3.57|1.9	0	.
chr9	78004400	78009799	DM_H3K27me3_cKO_DEseq2_up_1176|5.55|3.79|1.76	0	.
chr15	94501000	94505999	DM_H3K27me3_cKO_DEseq2_up_1177|5.84|4.23|1.61	0	.
chr3	148609600	148616599	DM_H3K27me3_cKO_DEseq2_up_1178|6.16|4.79|1.37	0	.
chr8	113976800	113988399	DM_H3K27me3_cKO_DEseq2_up_1179|7.22|6.23|0.98	0	.
chr2	165748200	165753799	DM_H3K27me3_cKO_DEseq2_up_1180|5.88|4.37|1.51	0	.
chr6	82131600	82133999	DM_H3K27me3_cKO_DEseq2_up_1181|4.92|2.14|2.78	0	.
chr3	106142200	106190999	DM_H3K27me3_cKO_DEseq2_up_1182|9.06|8.29|0.77	0	.
chr6	137456400	137466599	DM_H3K27me3_cKO_DEseq2_up_1183|6.71|5.55|1.16	0	.
chr6	95092200	95096799	DM_H3K27me3_cKO_DEseq2_up_1184|5.26|3.15|2.11	0	.
chr2	116811800	116826199	DM_H3K27me3_cKO_DEseq2_up_1185|7.18|6.12|1.06	0	.
chr5	112129800	112139599	DM_H3K27me3_cKO_DEseq2_up_1186|6.78|5.67|1.11	0	.
chr4	43505600	43510399	DM_H3K27me3_cKO_DEseq2_up_1187|5.78|4.16|1.62	0	.
chr17	30803600	30814399	DM_H3K27me3_cKO_DEseq2_up_1188|6.96|5.9|1.06	0	.
chr9	114851400	114859199	DM_H3K27me3_cKO_DEseq2_up_1189|6.13|4.71|1.42	0	.
chr10	9008800	9014599	DM_H3K27me3_cKO_DEseq2_up_1190|5.6|3.9|1.71	0	.
chr8	57229800	57233399	DM_H3K27me3_cKO_DEseq2_up_1191|4.83|2.15|2.68	0	.
chr11	12526400	12531799	DM_H3K27me3_cKO_DEseq2_up_1192|5.32|3.38|1.95	0	.
chr2	79546400	79554999	DM_H3K27me3_cKO_DEseq2_up_1193|6.32|5.03|1.29	0	.
chr12	53744400	53762799	DM_H3K27me3_cKO_DEseq2_up_1194|7.65|6.77|0.88	0	.
chr3	89134800	89138999	DM_H3K27me3_cKO_DEseq2_up_1195|5.03|2.57|2.45	0	.
chr1	85497600	85502399	DM_H3K27me3_cKO_DEseq2_up_1196|5.8|4.15|1.65	0	.
chr12	76068800	76077999	DM_H3K27me3_cKO_DEseq2_up_1197|6.63|5.44|1.19	0	.
chr11	114333600	114340999	DM_H3K27me3_cKO_DEseq2_up_1198|6.22|4.89|1.33	0	.
chr2	179106200	179115199	DM_H3K27me3_cKO_DEseq2_up_1199|6.74|5.6|1.14	0	.
chr5	64487200	64495799	DM_H3K27me3_cKO_DEseq2_up_1200|5.97|4.54|1.43	0	.
chr17	64558200	64562199	DM_H3K27me3_cKO_DEseq2_up_1201|5.29|3.31|1.98	0	.
chr2	151970000	151976799	DM_H3K27me3_cKO_DEseq2_up_1202|6.43|5.23|1.2	0	.
chr3	55161400	55164599	DM_H3K27me3_cKO_DEseq2_up_1203|4.53|0.99|3.55	0	.
chr5	140986600	140992399	DM_H3K27me3_cKO_DEseq2_up_1204|5.68|4.07|1.61	0	.
chr2	165134000	165136999	DM_H3K27me3_cKO_DEseq2_up_1205|4.72|1.56|3.16	0	.
chr15	69487400	69490799	DM_H3K27me3_cKO_DEseq2_up_1206|4.88|2.16|2.72	0	.
chr12	101216000	101218199	DM_H3K27me3_cKO_DEseq2_up_1207|4.45|-0.01|4.46	0	.
chr11	91130800	91137999	DM_H3K27me3_cKO_DEseq2_up_1208|6.32|5.05|1.27	0	.
chr13	101808200	101813799	DM_H3K27me3_cKO_DEseq2_up_1209|5.95|4.51|1.44	0	.
chr7	72732400	72738599	DM_H3K27me3_cKO_DEseq2_up_1210|5.76|4.2|1.56	0	.
chr3	103593600	103598399	DM_H3K27me3_cKO_DEseq2_up_1211|5.42|3.38|2.03	0	.
chr5	43144800	43151799	DM_H3K27me3_cKO_DEseq2_up_1212|6.08|4.58|1.5	0	.
chr9	60337400	60347999	DM_H3K27me3_cKO_DEseq2_up_1213|6.66|5.48|1.18	0	.
chr19	45033800	45038399	DM_H3K27me3_cKO_DEseq2_up_1214|5.29|3.24|2.05	0	.
chr8	26441400	26450199	DM_H3K27me3_cKO_DEseq2_up_1215|6.33|5.07|1.26	0	.
chr10	120847000	120865799	DM_H3K27me3_cKO_DEseq2_up_1216|7.99|7.15|0.84	0	.
chr16	92707600	92716599	DM_H3K27me3_cKO_DEseq2_up_1217|6.38|5.15|1.23	0	.
chr11	21923200	21927999	DM_H3K27me3_cKO_DEseq2_up_1218|5.36|3.44|1.91	0	.
chr18	43449200	43452799	DM_H3K27me3_cKO_DEseq2_up_1219|4.97|2.45|2.52	0	.
chr4	123856000	123859199	DM_H3K27me3_cKO_DEseq2_up_1220|5.1|2.8|2.3	0	.
chr15	26551400	26555999	DM_H3K27me3_cKO_DEseq2_up_1221|5.59|3.84|1.75	0	.
chr1	157754600	157758599	DM_H3K27me3_cKO_DEseq2_up_1222|5.46|3.63|1.83	0	.
chr13	37824800	37833799	DM_H3K27me3_cKO_DEseq2_up_1223|6.8|5.53|1.27	0	.
chr5	118458600	118463199	DM_H3K27me3_cKO_DEseq2_up_1224|5.54|3.79|1.74	0	.
chr2	147105800	147113199	DM_H3K27me3_cKO_DEseq2_up_1225|5.96|4.54|1.42	0	.
chr17	45089600	45092799	DM_H3K27me3_cKO_DEseq2_up_1226|4.77|1.78|2.99	0	.
chr16	93170600	93175199	DM_H3K27me3_cKO_DEseq2_up_1227|5.38|3.31|2.06	0	.
chr7	128343200	128353399	DM_H3K27me3_cKO_DEseq2_up_1228|6.54|5.29|1.25	0	.
chr2	160526000	160533799	DM_H3K27me3_cKO_DEseq2_up_1229|6.48|5.29|1.2	0	.
chr1	185667600	185672199	DM_H3K27me3_cKO_DEseq2_up_1230|5.55|3.56|1.98	0	.
chr7	112785000	112789199	DM_H3K27me3_cKO_DEseq2_up_1231|5.75|4.16|1.59	0	.
chr2	63509200	63512999	DM_H3K27me3_cKO_DEseq2_up_1232|5.17|3.07|2.1	0	.
chr18	68527600	68532399	DM_H3K27me3_cKO_DEseq2_up_1233|4.98|2.3|2.69	0	.
chr13	107949600	107960799	DM_H3K27me3_cKO_DEseq2_up_1234|6.82|5.75|1.06	0	.
chr4	44563600	44581399	DM_H3K27me3_cKO_DEseq2_up_1235|7.56|6.6|0.96	0	.
chr8	13059000	13062199	DM_H3K27me3_cKO_DEseq2_up_1236|4.82|1.8|3.02	0	.
chr10	93634000	93654199	DM_H3K27me3_cKO_DEseq2_up_1237|7.98|7.07|0.91	0	.
chr12	108385600	108389799	DM_H3K27me3_cKO_DEseq2_up_1238|5.11|2.79|2.32	0	.
chr11	95828000	95850799	DM_H3K27me3_cKO_DEseq2_up_1239|8.14|7.29|0.86	0	.
chr11	59926200	59934799	DM_H3K27me3_cKO_DEseq2_up_1240|6.44|5.25|1.19	0	.
chr17	66781400	66786999	DM_H3K27me3_cKO_DEseq2_up_1241|5.99|4.57|1.42	0	.
chr18	75914600	75928199	DM_H3K27me3_cKO_DEseq2_up_1242|7.32|6.29|1.04	0	.
chr18	80479200	80484399	DM_H3K27me3_cKO_DEseq2_up_1243|5.63|3.94|1.7	0	.
chr2	63958600	63975999	DM_H3K27me3_cKO_DEseq2_up_1244|7.94|7.07|0.88	0	.
chr11	66978000	66984399	DM_H3K27me3_cKO_DEseq2_up_1245|6.09|4.71|1.38	0	.
chr3	147977800	147993999	DM_H3K27me3_cKO_DEseq2_up_1246|7.54|6.62|0.92	0	.
chr1	57054800	57059399	DM_H3K27me3_cKO_DEseq2_up_1247|5.32|3.38|1.94	0	.
chr10	85443200	85485599	DM_H3K27me3_cKO_DEseq2_up_1248|8.88|8.12|0.77	0	.
chr7	36185400	36199999	DM_H3K27me3_cKO_DEseq2_up_1249|7.18|6.2|0.97	0	.
chr2	64845200	64854399	DM_H3K27me3_cKO_DEseq2_up_1250|6.84|5.75|1.09	0	.
chr14	116479200	116481399	DM_H3K27me3_cKO_DEseq2_up_1251|4.43|-0.01|4.45	0	.
chr8	78857600	78861199	DM_H3K27me3_cKO_DEseq2_up_1252|5.23|3.15|2.08	0	.
chr14	118560200	118571599	DM_H3K27me3_cKO_DEseq2_up_1253|7.08|5.94|1.14	0	.
chr4	38687600	38694599	DM_H3K27me3_cKO_DEseq2_up_1254|5.72|4.16|1.57	0	.
chr10	84703400	84709599	DM_H3K27me3_cKO_DEseq2_up_1255|6.01|4.6|1.41	0	.
chr7	73196200	73199999	DM_H3K27me3_cKO_DEseq2_up_1256|5.39|3.45|1.94	0	.
chr3	34162600	34166399	DM_H3K27me3_cKO_DEseq2_up_1257|5.6|3.94|1.66	0	.
chr17	79764600	79775399	DM_H3K27me3_cKO_DEseq2_up_1258|6.95|5.91|1.04	0	.
chr1	73562600	73568799	DM_H3K27me3_cKO_DEseq2_up_1259|5.65|4.03|1.62	0	.
chr10	77145200	77147999	DM_H3K27me3_cKO_DEseq2_up_1260|4.81|1.99|2.81	0	.
chr14	86393400	86396999	DM_H3K27me3_cKO_DEseq2_up_1261|5.75|4.16|1.59	0	.
chr1	66831600	66835599	DM_H3K27me3_cKO_DEseq2_up_1262|5.23|3.16|2.07	0	.
chr11	58530800	58538399	DM_H3K27me3_cKO_DEseq2_up_1263|6.22|4.92|1.31	0	.
chr11	27419000	27425999	DM_H3K27me3_cKO_DEseq2_up_1264|5.91|4.35|1.56	0	.
chr6	94673800	94690999	DM_H3K27me3_cKO_DEseq2_up_1265|7.69|6.78|0.91	0	.
chr19	8105600	8109199	DM_H3K27me3_cKO_DEseq2_up_1266|4.64|1.3|3.34	0	.
chr13	12801200	12860199	DM_H3K27me3_cKO_DEseq2_up_1267|9.87|9.1|0.77	0	.
chr6	51804000	51806599	DM_H3K27me3_cKO_DEseq2_up_1268|4.83|2.16|2.67	0	.
chr6	127595600	127600999	DM_H3K27me3_cKO_DEseq2_up_1269|5.92|4.37|1.55	0	.
chr9	77381400	77384999	DM_H3K27me3_cKO_DEseq2_up_1270|4.96|2.45|2.51	0	.
chr1	176356200	176371399	DM_H3K27me3_cKO_DEseq2_up_1271|7.06|6.05|1.01	0	.
chr18	83326400	83338799	DM_H3K27me3_cKO_DEseq2_up_1272|7.24|6.24|1	0	.
chr4	148120800	148133599	DM_H3K27me3_cKO_DEseq2_up_1273|7.07|6|1.07	0	.
chr17	47809800	47818399	DM_H3K27me3_cKO_DEseq2_up_1274|6.4|5.16|1.25	0	.
chr19	60334200	60343999	DM_H3K27me3_cKO_DEseq2_up_1275|6.41|5.17|1.23	0	.
chr5	117927600	117932399	DM_H3K27me3_cKO_DEseq2_up_1276|5.73|4.16|1.57	0	.
chr13	107961800	107964799	DM_H3K27me3_cKO_DEseq2_up_1277|5.55|3.8|1.76	0	.
chr18	76079200	76090399	DM_H3K27me3_cKO_DEseq2_up_1278|6.71|5.6|1.11	0	.
chr17	31704800	31711199	DM_H3K27me3_cKO_DEseq2_up_1279|6.13|4.79|1.33	0	.
chr7	73906000	73917399	DM_H3K27me3_cKO_DEseq2_up_1280|6.89|5.81|1.08	0	.
chr10	64976600	64981999	DM_H3K27me3_cKO_DEseq2_up_1281|5.4|3.44|1.97	0	.
chr1	188135000	188141999	DM_H3K27me3_cKO_DEseq2_up_1282|6.35|5.13|1.22	0	.
chr2	128564200	128566399	DM_H3K27me3_cKO_DEseq2_up_1283|4.54|0.99|3.54	0	.
chr8	63801800	63806199	DM_H3K27me3_cKO_DEseq2_up_1284|5.27|3.31|1.96	0	.
chr4	125768400	125773999	DM_H3K27me3_cKO_DEseq2_up_1285|5.71|4.12|1.59	0	.
chr7	143461800	143467199	DM_H3K27me3_cKO_DEseq2_up_1286|5.46|3.69|1.78	0	.
chr15	80225800	80228999	DM_H3K27me3_cKO_DEseq2_up_1287|4.76|1.8|2.96	0	.
chr9	47276600	47284599	DM_H3K27me3_cKO_DEseq2_up_1288|6.44|5.23|1.21	0	.
chr14	76066600	76069799	DM_H3K27me3_cKO_DEseq2_up_1289|4.76|1.99|2.77	0	.
chr2	166520600	166525799	DM_H3K27me3_cKO_DEseq2_up_1290|5.45|3.5|1.94	0	.
chr18	38494200	38497599	DM_H3K27me3_cKO_DEseq2_up_1291|5.27|3.06|2.2	0	.
chr13	48261800	48276999	DM_H3K27me3_cKO_DEseq2_up_1292|7.63|6.65|0.98	0	.
chr7	98748600	98759599	DM_H3K27me3_cKO_DEseq2_up_1293|6.84|5.77|1.07	0	.
chr4	32154400	32158599	DM_H3K27me3_cKO_DEseq2_up_1294|5.23|3.15|2.08	0	.
chr10	18501600	18519199	DM_H3K27me3_cKO_DEseq2_up_1295|7.47|6.54|0.93	0	.
chr11	87679600	87684399	DM_H3K27me3_cKO_DEseq2_up_1296|5.34|3.45|1.89	0	.
chr5	35184200	35193999	DM_H3K27me3_cKO_DEseq2_up_1297|6.47|5.31|1.17	0	.
chr6	50888200	50893799	DM_H3K27me3_cKO_DEseq2_up_1298|5.85|4.3|1.54	0	.
chr12	80143400	80147399	DM_H3K27me3_cKO_DEseq2_up_1299|4.99|2.44|2.55	0	.
chr15	57596800	57607399	DM_H3K27me3_cKO_DEseq2_up_1300|6.69|5.56|1.13	0	.
chr11	82597400	82606399	DM_H3K27me3_cKO_DEseq2_up_1301|6.62|5.49|1.13	0	.
chr4	105274000	105290599	DM_H3K27me3_cKO_DEseq2_up_1302|7.45|6.54|0.91	0	.
chr5	112034400	112036399	DM_H3K27me3_cKO_DEseq2_up_1303|4.47|0.58|3.9	0	.
chr8	121277000	121295199	DM_H3K27me3_cKO_DEseq2_up_1304|7.61|6.73|0.89	0	.
chr6	144939600	144948399	DM_H3K27me3_cKO_DEseq2_up_1305|6.34|5.07|1.27	0	.
chr7	133169600	133174799	DM_H3K27me3_cKO_DEseq2_up_1306|5.39|3.5|1.89	0	.
chr16	5599800	5606399	DM_H3K27me3_cKO_DEseq2_up_1307|5.84|4.24|1.6	0	.
chr6	18043600	18047199	DM_H3K27me3_cKO_DEseq2_up_1308|5.01|2.68|2.33	0	.
chr2	72462400	72464799	DM_H3K27me3_cKO_DEseq2_up_1309|4.67|1.57|3.1	0	.
chr14	76617400	76623399	DM_H3K27me3_cKO_DEseq2_up_1310|5.74|4.15|1.59	0	.
chr10	111756000	111763599	DM_H3K27me3_cKO_DEseq2_up_1311|6.05|4.69|1.36	0	.
chr4	106115600	106118199	DM_H3K27me3_cKO_DEseq2_up_1312|4.62|1.32|3.3	0	.
chr6	20265600	20268599	DM_H3K27me3_cKO_DEseq2_up_1313|4.7|1.79|2.91	0	.
chr3	124379800	124384999	DM_H3K27me3_cKO_DEseq2_up_1314|5.37|3.51|1.86	0	.
chr18	69729600	69738399	DM_H3K27me3_cKO_DEseq2_up_1315|6.41|5.22|1.2	0	.
chr11	63375400	63380399	DM_H3K27me3_cKO_DEseq2_up_1316|5.48|3.68|1.8	0	.
chr4	69830200	69833199	DM_H3K27me3_cKO_DEseq2_up_1317|4.7|1.58|3.12	0	.
chr10	8959400	8964999	DM_H3K27me3_cKO_DEseq2_up_1318|5.75|4.11|1.64	0	.
chr14	113194400	113198799	DM_H3K27me3_cKO_DEseq2_up_1319|5.04|2.69|2.36	0	.
chr4	8850400	8859199	DM_H3K27me3_cKO_DEseq2_up_1320|6.98|5.97|1.01	0	.
chr11	36938800	36942999	DM_H3K27me3_cKO_DEseq2_up_1321|5.21|3.16|2.05	0	.
chr13	57326800	57332199	DM_H3K27me3_cKO_DEseq2_up_1322|5.96|4.45|1.51	0	.
chr2	156837000	156847599	DM_H3K27me3_cKO_DEseq2_up_1323|6.92|5.87|1.05	0	.
chr1	59617400	59623199	DM_H3K27me3_cKO_DEseq2_up_1324|5.71|4.16|1.56	0	.
chr7	119267600	119272399	DM_H3K27me3_cKO_DEseq2_up_1325|5.66|4.03|1.63	0	.
chr8	23661000	23667599	DM_H3K27me3_cKO_DEseq2_up_1326|5.67|4.07|1.59	0	.
chr2	3363400	3373199	DM_H3K27me3_cKO_DEseq2_up_1327|6.51|5.31|1.2	0	.
chr7	6911800	6915399	DM_H3K27me3_cKO_DEseq2_up_1328|5.45|3.63|1.81	0	.
chr4	55715600	55731399	DM_H3K27me3_cKO_DEseq2_up_1329|7.23|6.26|0.97	0	.
chr3	35241200	35248999	DM_H3K27me3_cKO_DEseq2_up_1330|6.87|5.82|1.05	0	.
chr5	129352000	129356199	DM_H3K27me3_cKO_DEseq2_up_1331|5.1|2.78|2.32	0	.
chr3	51817400	51821399	DM_H3K27me3_cKO_DEseq2_up_1332|5.05|2.79|2.26	0	.
chr3	34868000	34877999	DM_H3K27me3_cKO_DEseq2_up_1333|6.46|5.29|1.17	0	.
chr8	48176200	48184999	DM_H3K27me3_cKO_DEseq2_up_1334|6.42|5.21|1.21	0	.
chr7	67780200	67786399	DM_H3K27me3_cKO_DEseq2_up_1335|5.77|4.23|1.54	0	.
chr11	95988600	95998199	DM_H3K27me3_cKO_DEseq2_up_1336|7.14|6.18|0.95	0	.
chr4	123072800	123078199	DM_H3K27me3_cKO_DEseq2_up_1337|5.53|3.84|1.69	0	.
chr2	158557800	158576199	DM_H3K27me3_cKO_DEseq2_up_1338|7.8|6.94|0.86	0	.
chr17	64396600	64399199	DM_H3K27me3_cKO_DEseq2_up_1339|4.52|0.99|3.52	0	.
chr10	77657200	77665399	DM_H3K27me3_cKO_DEseq2_up_1340|6.31|5.07|1.24	0	.
chr13	90837600	90844999	DM_H3K27me3_cKO_DEseq2_up_1341|6.1|4.71|1.39	0	.
chr1	188493000	188503999	DM_H3K27me3_cKO_DEseq2_up_1342|6.49|5.27|1.23	0	.
chr13	98628600	98640799	DM_H3K27me3_cKO_DEseq2_up_1343|6.64|5.54|1.1	0	.
chr5	75666600	75679199	DM_H3K27me3_cKO_DEseq2_up_1344|6.88|5.82|1.06	0	.
chr7	130171600	130174199	DM_H3K27me3_cKO_DEseq2_up_1345|4.64|1.58|3.07	0	.
chr12	110340600	110353399	DM_H3K27me3_cKO_DEseq2_up_1346|6.82|5.73|1.1	0	.
chr12	47737800	47752399	DM_H3K27me3_cKO_DEseq2_up_1347|7.13|6.15|0.97	0	.
chr18	55768400	55771599	DM_H3K27me3_cKO_DEseq2_up_1348|4.96|2.32|2.65	0	.
chr15	99544800	99548599	DM_H3K27me3_cKO_DEseq2_up_1349|5.37|3.51|1.86	0	.
chr17	12637800	12639599	DM_H3K27me3_cKO_DEseq2_up_1350|4.67|1.56|3.11	0	.
chr6	127382200	127385399	DM_H3K27me3_cKO_DEseq2_up_1351|4.82|2.16|2.66	0	.
chr2	133627600	133638599	DM_H3K27me3_cKO_DEseq2_up_1352|6.78|5.73|1.05	0	.
chr1	41267800	41278999	DM_H3K27me3_cKO_DEseq2_up_1353|6.86|5.79|1.07	0	.
chr8	48651200	48660599	DM_H3K27me3_cKO_DEseq2_up_1354|6.73|5.64|1.09	0	.
chr4	98099000	98109999	DM_H3K27me3_cKO_DEseq2_up_1355|6.67|5.59|1.09	0	.
chr7	143749800	143752399	DM_H3K27me3_cKO_DEseq2_up_1356|4.47|0.57|3.91	0	.
chr2	168462800	168468599	DM_H3K27me3_cKO_DEseq2_up_1357|5.6|3.84|1.77	0	.
chr2	74182600	74189199	DM_H3K27me3_cKO_DEseq2_up_1358|5.71|4.11|1.6	0	.
chr7	36047800	36050799	DM_H3K27me3_cKO_DEseq2_up_1359|4.78|1.78|2.99	0	.
chr10	63055600	63066799	DM_H3K27me3_cKO_DEseq2_up_1360|6.74|5.61|1.13	0	.
chr13	43905600	43911199	DM_H3K27me3_cKO_DEseq2_up_1361|5.92|4.45|1.47	0	.
chr3	89584000	89585999	DM_H3K27me3_cKO_DEseq2_up_1362|4.59|1.3|3.29	0	.
chr8	125334200	125340599	DM_H3K27me3_cKO_DEseq2_up_1363|6.09|4.66|1.43	0	.
chr1	163549600	163560799	DM_H3K27me3_cKO_DEseq2_up_1364|6.77|5.71|1.06	0	.
chr5	114576600	114595999	DM_H3K27me3_cKO_DEseq2_up_1365|7.71|6.87|0.84	0	.
chr2	27365200	27371999	DM_H3K27me3_cKO_DEseq2_up_1366|5.92|4.48|1.44	0	.
chr16	67880200	67884799	DM_H3K27me3_cKO_DEseq2_up_1367|5.12|2.9|2.23	0	.
chr3	105237600	105243799	DM_H3K27me3_cKO_DEseq2_up_1368|5.8|4.31|1.49	0	.
chr15	3830800	3834599	DM_H3K27me3_cKO_DEseq2_up_1369|5.03|2.79|2.24	0	.
chr6	145586800	145610399	DM_H3K27me3_cKO_DEseq2_up_1370|8.09|7.29|0.79	0	.
chr9	117868200	117878599	DM_H3K27me3_cKO_DEseq2_up_1371|6.8|5.69|1.11	0	.
chr3	34806000	34812199	DM_H3K27me3_cKO_DEseq2_up_1372|6.26|4.94|1.33	0	.
chr3	117050800	117053799	DM_H3K27me3_cKO_DEseq2_up_1373|4.84|2|2.84	0	.
chr1	187436800	187446999	DM_H3K27me3_cKO_DEseq2_up_1374|6.62|5.51|1.11	0	.
chr6	48832000	48843999	DM_H3K27me3_cKO_DEseq2_up_1375|6.94|5.92|1.03	0	.
chr18	68850400	68854599	DM_H3K27me3_cKO_DEseq2_up_1376|6.12|4.77|1.35	0	.
chr5	123293800	123299799	DM_H3K27me3_cKO_DEseq2_up_1377|6.08|4.65|1.42	0	.
chr2	170158600	170162999	DM_H3K27me3_cKO_DEseq2_up_1378|5.47|3.74|1.73	0	.
chr14	59738000	59740999	DM_H3K27me3_cKO_DEseq2_up_1379|4.98|2.44|2.54	0	.
chr4	44087800	44090599	DM_H3K27me3_cKO_DEseq2_up_1380|4.71|1.79|2.92	0	.
chr5	92374800	92381199	DM_H3K27me3_cKO_DEseq2_up_1381|6.29|5.01|1.28	0	.
chr7	28642600	28651399	DM_H3K27me3_cKO_DEseq2_up_1382|6.25|4.98|1.27	0	.
chr1	116881400	116884399	DM_H3K27me3_cKO_DEseq2_up_1383|4.67|1.58|3.09	0	.
chr9	60874200	60884799	DM_H3K27me3_cKO_DEseq2_up_1384|6.72|5.63|1.09	0	.
chr1	13932200	13935199	DM_H3K27me3_cKO_DEseq2_up_1385|4.85|2.31|2.54	0	.
chr11	96575200	96584199	DM_H3K27me3_cKO_DEseq2_up_1386|6.85|5.81|1.05	0	.
chr15	93120600	93125399	DM_H3K27me3_cKO_DEseq2_up_1387|5.4|3.5|1.89	0	.
chr8	48967400	48975199	DM_H3K27me3_cKO_DEseq2_up_1388|6.95|5.92|1.03	0	.
chr7	34541600	34547799	DM_H3K27me3_cKO_DEseq2_up_1389|6.15|4.84|1.31	0	.
chr6	13160800	13166599	DM_H3K27me3_cKO_DEseq2_up_1390|5.86|4.41|1.45	0	.
chr4	100614200	100618999	DM_H3K27me3_cKO_DEseq2_up_1391|5.57|3.85|1.72	0	.
chr4	32159000	32168199	DM_H3K27me3_cKO_DEseq2_up_1392|6.73|5.6|1.12	0	.
chr1	24162400	24166599	DM_H3K27me3_cKO_DEseq2_up_1393|5.05|2.56|2.49	0	.
chr2	153895600	153903599	DM_H3K27me3_cKO_DEseq2_up_1394|6.18|4.84|1.34	0	.
chr2	44523600	44525599	DM_H3K27me3_cKO_DEseq2_up_1395|4.66|1.56|3.1	0	.
chr6	51051200	51059599	DM_H3K27me3_cKO_DEseq2_up_1396|6.61|5.42|1.19	0	.
chr10	51700400	51703599	DM_H3K27me3_cKO_DEseq2_up_1397|4.72|1.8|2.92	0	.
chr6	99916000	99922799	DM_H3K27me3_cKO_DEseq2_up_1398|6.08|4.66|1.42	0	.
chr4	139977600	139979999	DM_H3K27me3_cKO_DEseq2_up_1399|4.88|2.14|2.74	0	.
chr2	85894200	85899199	DM_H3K27me3_cKO_DEseq2_up_1400|5.26|3.15|2.11	0	.
chr14	20223200	20227399	DM_H3K27me3_cKO_DEseq2_up_1401|5.78|4.27|1.51	0	.
chr4	47513200	47518799	DM_H3K27me3_cKO_DEseq2_up_1402|5.39|3.57|1.82	0	.
chr6	97302200	97350199	DM_H3K27me3_cKO_DEseq2_up_1403|9.19|8.44|0.74	0	.
chr11	99373600	99381399	DM_H3K27me3_cKO_DEseq2_up_1404|6.07|4.74|1.33	0	.
chr5	104001400	104005799	DM_H3K27me3_cKO_DEseq2_up_1405|5.57|3.84|1.73	0	.
chr13	56340600	56349199	DM_H3K27me3_cKO_DEseq2_up_1406|6.67|5.57|1.1	0	.
chr5	142319800	142327399	DM_H3K27me3_cKO_DEseq2_up_1407|6.02|4.66|1.37	0	.
chr18	38854400	38855599	DM_H3K27me3_cKO_DEseq2_up_1408|4.38|-0.01|4.4	0	.
chr11	96394600	96400199	DM_H3K27me3_cKO_DEseq2_up_1409|6.29|5.03|1.26	0	.
chr8	10748600	10767199	DM_H3K27me3_cKO_DEseq2_up_1410|7.6|6.64|0.96	0	.
chr8	108574800	108580999	DM_H3K27me3_cKO_DEseq2_up_1411|6.14|4.76|1.38	0	.
chr7	37427600	37439199	DM_H3K27me3_cKO_DEseq2_up_1412|6.67|5.59|1.08	0	.
chr4	134749000	134755999	DM_H3K27me3_cKO_DEseq2_up_1413|6.08|4.68|1.4	0	.
chr15	72480400	72485999	DM_H3K27me3_cKO_DEseq2_up_1414|5.52|3.75|1.77	0	.
chr1	88836800	88843799	DM_H3K27me3_cKO_DEseq2_up_1415|6.25|4.94|1.31	0	.
chr2	9631800	9644199	DM_H3K27me3_cKO_DEseq2_up_1416|7.31|6.4|0.91	0	.
chr1	133916200	133922599	DM_H3K27me3_cKO_DEseq2_up_1417|5.9|4.44|1.45	0	.
chr14	72527200	72533199	DM_H3K27me3_cKO_DEseq2_up_1418|6.32|4.99|1.33	0	.
chr6	137823400	137824999	DM_H3K27me3_cKO_DEseq2_up_1419|4.55|1.3|3.24	0	.
chr5	119053200	119064599	DM_H3K27me3_cKO_DEseq2_up_1420|7.09|6.07|1.02	0	.
chr14	50197800	50199999	DM_H3K27me3_cKO_DEseq2_up_1421|4.42|0.57|3.85	0	.
chr4	31325200	31330999	DM_H3K27me3_cKO_DEseq2_up_1422|5.25|3.23|2.02	0	.
chr2	157718800	157726399	DM_H3K27me3_cKO_DEseq2_up_1423|5.98|4.41|1.56	0	.
chr4	124027800	124043199	DM_H3K27me3_cKO_DEseq2_up_1424|7.62|6.78|0.84	0	.
chr9	33336200	33346399	DM_H3K27me3_cKO_DEseq2_up_1425|6.59|5.43|1.16	0	.
chr10	91371000	91374399	DM_H3K27me3_cKO_DEseq2_up_1426|5.14|2.99|2.15	0	.
chr18	63208000	63212599	DM_H3K27me3_cKO_DEseq2_up_1427|5.32|3.38|1.93	0	.
chr8	90230000	90250599	DM_H3K27me3_cKO_DEseq2_up_1428|7.59|6.72|0.87	0	.
chr5	73726200	73742599	DM_H3K27me3_cKO_DEseq2_up_1429|7.25|6.32|0.94	0	.
chr10	41714400	41717199	DM_H3K27me3_cKO_DEseq2_up_1430|4.66|1.56|3.1	0	.
chr7	15878000	15883599	DM_H3K27me3_cKO_DEseq2_up_1431|5.68|4.11|1.56	0	.
chr1	89506200	89522999	DM_H3K27me3_cKO_DEseq2_up_1432|7.62|6.77|0.85	0	.
chr1	88222000	88223199	DM_H3K27me3_cKO_DEseq2_up_1433|4.84|2.3|2.54	0	.
chr4	50573000	50575399	DM_H3K27me3_cKO_DEseq2_up_1434|4.42|0.58|3.84	0	.
chr2	123970800	123973399	DM_H3K27me3_cKO_DEseq2_up_1435|4.48|0.99|3.49	0	.
chr2	118508000	118516599	DM_H3K27me3_cKO_DEseq2_up_1436|6.74|5.57|1.17	0	.
chr9	118237000	118242999	DM_H3K27me3_cKO_DEseq2_up_1437|5.53|3.84|1.69	0	.
chr9	72911200	72914599	DM_H3K27me3_cKO_DEseq2_up_1438|5.03|2.79|2.24	0	.
chr19	16583800	16588399	DM_H3K27me3_cKO_DEseq2_up_1439|4.91|2.32|2.6	0	.
chr9	75897000	75901599	DM_H3K27me3_cKO_DEseq2_up_1440|5.54|3.85|1.69	0	.
chr13	47246600	47252999	DM_H3K27me3_cKO_DEseq2_up_1441|5.87|4.37|1.49	0	.
chr13	94075400	94079999	DM_H3K27me3_cKO_DEseq2_up_1442|5.7|4.16|1.54	0	.
chr19	17385200	17388799	DM_H3K27me3_cKO_DEseq2_up_1443|5.32|3.24|2.07	0	.
chr9	79544800	79551399	DM_H3K27me3_cKO_DEseq2_up_1444|5.47|3.74|1.72	0	.
chr1	132318600	132321399	DM_H3K27me3_cKO_DEseq2_up_1445|5.23|3.16|2.07	0	.
chr7	112503400	112521199	DM_H3K27me3_cKO_DEseq2_up_1446|7.53|6.63|0.9	0	.
chr5	98226800	98232599	DM_H3K27me3_cKO_DEseq2_up_1447|5.85|4.41|1.44	0	.
chr8	92399600	92411599	DM_H3K27me3_cKO_DEseq2_up_1448|6.67|5.46|1.22	0	.
chr10	12568800	12575999	DM_H3K27me3_cKO_DEseq2_up_1449|6.11|4.71|1.4	0	.
chr1	78566600	78569399	DM_H3K27me3_cKO_DEseq2_up_1450|5.09|2.9|2.19	0	.
chr10	121874200	121889199	DM_H3K27me3_cKO_DEseq2_up_1451|7.32|6.42|0.9	0	.
chr8	107810000	107811999	DM_H3K27me3_cKO_DEseq2_up_1452|4.62|1.58|3.04	0	.
chr7	115854400	115870199	DM_H3K27me3_cKO_DEseq2_up_1453|7.67|6.82|0.84	0	.
chr1	135080200	135091999	DM_H3K27me3_cKO_DEseq2_up_1454|6.9|5.83|1.07	0	.
chr12	54463200	54475999	DM_H3K27me3_cKO_DEseq2_up_1455|6.8|5.68|1.11	0	.
chr10	42364000	42367599	DM_H3K27me3_cKO_DEseq2_up_1456|4.65|1.58|3.08	0	.
chr9	102805000	102809199	DM_H3K27me3_cKO_DEseq2_up_1457|5.37|3.45|1.92	0	.
chr10	60457400	60461799	DM_H3K27me3_cKO_DEseq2_up_1458|5.21|3.23|1.97	0	.
chr3	97942600	97946199	DM_H3K27me3_cKO_DEseq2_up_1459|4.91|2.3|2.61	0	.
chr16	90827200	90832199	DM_H3K27me3_cKO_DEseq2_up_1460|6.02|4.63|1.39	0	.
chr14	33915600	33938399	DM_H3K27me3_cKO_DEseq2_up_1461|8.26|7.44|0.82	0	.
chr2	146743400	146752599	DM_H3K27me3_cKO_DEseq2_up_1462|6.56|5.41|1.15	0	.
chr4	32189400	32197799	DM_H3K27me3_cKO_DEseq2_up_1463|6.59|5.45|1.15	0	.
chr5	25613000	25617399	DM_H3K27me3_cKO_DEseq2_up_1464|5.11|2.99|2.12	0	.
chr5	119423600	119428599	DM_H3K27me3_cKO_DEseq2_up_1465|5.75|4.23|1.52	0	.
chr12	104992400	105003999	DM_H3K27me3_cKO_DEseq2_up_1466|6.93|5.94|0.99	0	.
chr5	63898800	63902399	DM_H3K27me3_cKO_DEseq2_up_1467|4.89|2.44|2.45	0	.
chr10	22952400	22958399	DM_H3K27me3_cKO_DEseq2_up_1468|5.78|4.27|1.51	0	.
chr15	56024800	56029199	DM_H3K27me3_cKO_DEseq2_up_1469|5.39|3.37|2.02	0	.
chr19	53676400	53677999	DM_H3K27me3_cKO_DEseq2_up_1470|4.63|1.57|3.06	0	.
chr6	100375600	100389799	DM_H3K27me3_cKO_DEseq2_up_1471|7.41|6.5|0.91	0	.
chr17	84494400	84501799	DM_H3K27me3_cKO_DEseq2_up_1472|6.02|4.66|1.36	0	.
chr11	96586800	96592399	DM_H3K27me3_cKO_DEseq2_up_1473|5.68|3.98|1.7	0	.
chr12	13635400	13643199	DM_H3K27me3_cKO_DEseq2_up_1474|5.98|4.6|1.39	0	.
chr2	63848800	63863399	DM_H3K27me3_cKO_DEseq2_up_1475|7.14|6.1|1.04	0	.
chr4	41723800	41735799	DM_H3K27me3_cKO_DEseq2_up_1476|7.17|6.21|0.96	0	.
chr3	154504200	154513199	DM_H3K27me3_cKO_DEseq2_up_1477|6.54|5.38|1.16	0	.
chr6	6034200	6045199	DM_H3K27me3_cKO_DEseq2_up_1478|6.7|5.64|1.06	0	.
chr16	12699000	12703799	DM_H3K27me3_cKO_DEseq2_up_1479|5.89|4.31|1.58	0	.
chr19	58344200	58355599	DM_H3K27me3_cKO_DEseq2_up_1480|6.7|5.6|1.1	0	.
chr6	64863200	64866799	DM_H3K27me3_cKO_DEseq2_up_1481|5.03|2.79|2.24	0	.
chr10	13411400	13439799	DM_H3K27me3_cKO_DEseq2_up_1482|8.38|7.56|0.82	0	.
chr5	77677000	77679399	DM_H3K27me3_cKO_DEseq2_up_1483|4.41|0.57|3.85	0	.
chr3	102299000	102303999	DM_H3K27me3_cKO_DEseq2_up_1484|5.51|3.68|1.83	0	.
chr19	57430000	57437399	DM_H3K27me3_cKO_DEseq2_up_1485|6.34|5.14|1.21	0	.
chr11	9329400	9333199	DM_H3K27me3_cKO_DEseq2_up_1486|5.05|2.79|2.27	0	.
chr4	19875600	19879799	DM_H3K27me3_cKO_DEseq2_up_1487|5.24|3.31|1.94	0	.
chr1	14720400	14728999	DM_H3K27me3_cKO_DEseq2_up_1488|6.06|4.71|1.35	0	.
chr8	19450400	19454599	DM_H3K27me3_cKO_DEseq2_up_1489|5.05|2.8|2.25	0	.
chr8	109069000	109072999	DM_H3K27me3_cKO_DEseq2_up_1490|4.96|2.58|2.39	0	.
chr4	124076000	124082799	DM_H3K27me3_cKO_DEseq2_up_1491|5.87|4.41|1.46	0	.
chr4	128839200	128847999	DM_H3K27me3_cKO_DEseq2_up_1492|6.41|5.21|1.19	0	.
chr18	65959400	65964999	DM_H3K27me3_cKO_DEseq2_up_1493|6.23|4.99|1.25	0	.
chr3	147408000	147414999	DM_H3K27me3_cKO_DEseq2_up_1494|5.85|4.37|1.48	0	.
chr4	147546400	147571599	DM_H3K27me3_cKO_DEseq2_up_1495|8.21|7.35|0.85	0	.
chr12	112181800	112187199	DM_H3K27me3_cKO_DEseq2_up_1496|5.73|4.08|1.65	0	.
chr9	64600800	64606599	DM_H3K27me3_cKO_DEseq2_up_1497|5.61|3.9|1.71	0	.
chr11	98555400	98565599	DM_H3K27me3_cKO_DEseq2_up_1498|6.96|5.97|0.98	0	.
chr9	74159400	74165599	DM_H3K27me3_cKO_DEseq2_up_1499|5.81|4.24|1.57	0	.
chr9	33809600	33814999	DM_H3K27me3_cKO_DEseq2_up_1500|5.53|3.68|1.85	0	.
chr3	39773600	39781799	DM_H3K27me3_cKO_DEseq2_up_1501|6.29|5.07|1.22	0	.
chr9	118224000	118232599	DM_H3K27me3_cKO_DEseq2_up_1502|6.84|5.81|1.03	0	.
chr14	54186400	54192199	DM_H3K27me3_cKO_DEseq2_up_1503|5.83|4.38|1.45	0	.
chr19	42326000	42329199	DM_H3K27me3_cKO_DEseq2_up_1504|4.88|2.45|2.43	0	.
chr6	129911600	129915799	DM_H3K27me3_cKO_DEseq2_up_1505|5.32|3.44|1.88	0	.
chr12	72509600	72520999	DM_H3K27me3_cKO_DEseq2_up_1506|7.11|6.16|0.95	0	.
chr18	14199400	14208199	DM_H3K27me3_cKO_DEseq2_up_1507|6.66|5.59|1.07	0	.
chr9	110895000	110901799	DM_H3K27me3_cKO_DEseq2_up_1508|6.21|4.89|1.31	0	.
chr10	126104000	126107399	DM_H3K27me3_cKO_DEseq2_up_1509|4.91|2.44|2.47	0	.
chr5	111897200	111903799	DM_H3K27me3_cKO_DEseq2_up_1510|6.15|4.8|1.36	0	.
chr7	19462600	19471999	DM_H3K27me3_cKO_DEseq2_up_1511|6.81|5.75|1.06	0	.
chr9	47359600	47368799	DM_H3K27me3_cKO_DEseq2_up_1512|6.8|5.74|1.06	0	.
chr4	89347200	89351599	DM_H3K27me3_cKO_DEseq2_up_1513|5.48|3.79|1.69	0	.
chr4	137855600	137858199	DM_H3K27me3_cKO_DEseq2_up_1514|4.7|1.8|2.9	0	.
chr8	80827800	80831199	DM_H3K27me3_cKO_DEseq2_up_1515|5.6|3.98|1.62	0	.
chr17	66726800	66739999	DM_H3K27me3_cKO_DEseq2_up_1516|7.06|6|1.05	0	.
chr11	14692200	14695999	DM_H3K27me3_cKO_DEseq2_up_1517|5.01|2.79|2.22	0	.
chr14	60730800	60738999	DM_H3K27me3_cKO_DEseq2_up_1518|6.27|5.05|1.22	0	.
chr2	78306800	78312399	DM_H3K27me3_cKO_DEseq2_up_1519|5.53|3.84|1.69	0	.
chr2	174722200	174730999	DM_H3K27me3_cKO_DEseq2_up_1520|6.68|5.61|1.06	0	.
chr1	187961600	187976599	DM_H3K27me3_cKO_DEseq2_up_1521|7.37|6.49|0.88	0	.
chr8	12306800	12343399	DM_H3K27me3_cKO_DEseq2_up_1522|9.15|8.37|0.78	0	.
chr14	118841800	118851599	DM_H3K27me3_cKO_DEseq2_up_1523|6.47|5.13|1.34	0	.
chr16	91128600	91130399	DM_H3K27me3_cKO_DEseq2_up_1524|4.35|-0.01|4.37	0	.
chr1	90431200	90435799	DM_H3K27me3_cKO_DEseq2_up_1525|5.56|3.94|1.62	0	.
chr5	76112800	76117399	DM_H3K27me3_cKO_DEseq2_up_1526|5.37|3.57|1.8	0	.
chr3	103406400	103408999	DM_H3K27me3_cKO_DEseq2_up_1527|4.5|0.98|3.52	0	.
chr9	72875800	72881799	DM_H3K27me3_cKO_DEseq2_up_1528|6.24|5.01|1.23	0	.
chr11	18606400	18611399	DM_H3K27me3_cKO_DEseq2_up_1529|5.47|3.74|1.73	0	.
chr1	34387400	34400599	DM_H3K27me3_cKO_DEseq2_up_1530|6.88|5.8|1.07	0	.
chr9	102371200	102387199	DM_H3K27me3_cKO_DEseq2_up_1531|7.28|6.36|0.92	0	.
chr4	140305000	140314599	DM_H3K27me3_cKO_DEseq2_up_1532|6.66|5.57|1.09	0	.
chr9	102673000	102676599	DM_H3K27me3_cKO_DEseq2_up_1533|5.06|2.89|2.17	0	.
chr16	92767000	92773799	DM_H3K27me3_cKO_DEseq2_up_1534|5.79|4.27|1.52	0	.
chr16	22796400	22803999	DM_H3K27me3_cKO_DEseq2_up_1535|6.12|4.74|1.37	0	.
chr2	52038000	52043199	DM_H3K27me3_cKO_DEseq2_up_1536|5.8|4.31|1.49	0	.
chr8	29773800	29777799	DM_H3K27me3_cKO_DEseq2_up_1537|5.19|3.16|2.03	0	.
chr10	111831200	111841199	DM_H3K27me3_cKO_DEseq2_up_1538|6.58|5.48|1.1	0	.
chr8	106615200	106625199	DM_H3K27me3_cKO_DEseq2_up_1539|6.58|5.43|1.15	0	.
chr13	44353200	44362599	DM_H3K27me3_cKO_DEseq2_up_1540|6.66|5.53|1.13	0	.
chr4	84345200	84362399	DM_H3K27me3_cKO_DEseq2_up_1541|7.37|6.48|0.89	0	.
chr15	51627400	51633399	DM_H3K27me3_cKO_DEseq2_up_1542|5.82|4.31|1.51	0	.
chr7	133429400	133450599	DM_H3K27me3_cKO_DEseq2_up_1543|7.84|6.99|0.86	0	.
chr13	45439400	45442399	DM_H3K27me3_cKO_DEseq2_up_1544|4.67|1.79|2.89	0	.
chr2	146785600	146793599	DM_H3K27me3_cKO_DEseq2_up_1545|6.36|5.15|1.21	0	.
chr1	123145600	123148599	DM_H3K27me3_cKO_DEseq2_up_1546|4.93|2.3|2.63	0	.
chr7	109101800	109107599	DM_H3K27me3_cKO_DEseq2_up_1547|5.45|3.74|1.71	0	.
chr18	72731800	72735599	DM_H3K27me3_cKO_DEseq2_up_1548|5.02|2.79|2.22	0	.
chr8	87922800	87934399	DM_H3K27me3_cKO_DEseq2_up_1549|6.84|5.79|1.05	0	.
chr10	37635000	37638399	DM_H3K27me3_cKO_DEseq2_up_1550|4.96|2.68|2.28	0	.
chr6	138303200	138309399	DM_H3K27me3_cKO_DEseq2_up_1551|5.96|4.4|1.56	0	.
chr5	107023200	107027199	DM_H3K27me3_cKO_DEseq2_up_1552|5.03|2.79|2.24	0	.
chr15	11145800	11156799	DM_H3K27me3_cKO_DEseq2_up_1553|6.47|5.21|1.25	0	.
chr2	157522000	157526999	DM_H3K27me3_cKO_DEseq2_up_1554|5.6|3.98|1.62	0	.
chr11	4625200	4632799	DM_H3K27me3_cKO_DEseq2_up_1555|5.95|4.54|1.41	0	.
chr8	117009800	117019799	DM_H3K27me3_cKO_DEseq2_up_1556|6.79|5.74|1.05	0	.
chr13	39904000	39910799	DM_H3K27me3_cKO_DEseq2_up_1557|5.79|4.27|1.52	0	.
chr16	44828800	44832999	DM_H3K27me3_cKO_DEseq2_up_1558|5.2|3.16|2.04	0	.
chr7	143764000	143770399	DM_H3K27me3_cKO_DEseq2_up_1559|6.06|4.66|1.4	0	.
chr6	49019600	49037999	DM_H3K27me3_cKO_DEseq2_up_1560|7.64|6.74|0.9	0	.
chr2	106055000	106066799	DM_H3K27me3_cKO_DEseq2_up_1561|6.78|5.74|1.04	0	.
chr8	111370000	111374399	DM_H3K27me3_cKO_DEseq2_up_1562|5.39|3.63|1.76	0	.
chr8	76190400	76192799	DM_H3K27me3_cKO_DEseq2_up_1563|4.47|0.99|3.48	0	.
chr7	107005200	107008799	DM_H3K27me3_cKO_DEseq2_up_1564|5.07|2.89|2.18	0	.
chr14	71524200	71527599	DM_H3K27me3_cKO_DEseq2_up_1565|4.88|2.44|2.43	0	.
chr9	23002200	23013999	DM_H3K27me3_cKO_DEseq2_up_1566|7.31|6.38|0.93	0	.
chr10	127974400	127976399	DM_H3K27me3_cKO_DEseq2_up_1567|4.39|0.58|3.81	0	.
chr13	37102600	37106399	DM_H3K27me3_cKO_DEseq2_up_1568|5.13|3.08|2.05	0	.
chr3	65512000	65520599	DM_H3K27me3_cKO_DEseq2_up_1569|6.24|4.96|1.28	0	.
chr4	124392600	124397799	DM_H3K27me3_cKO_DEseq2_up_1570|5.64|4.07|1.56	0	.
chr13	59988600	59998399	DM_H3K27me3_cKO_DEseq2_up_1571|6.64|5.52|1.12	0	.
chr7	13098200	13100599	DM_H3K27me3_cKO_DEseq2_up_1572|4.46|0.99|3.47	0	.
chr9	118252400	118260799	DM_H3K27me3_cKO_DEseq2_up_1573|6.59|5.49|1.09	0	.
chr5	101195400	101203599	DM_H3K27me3_cKO_DEseq2_up_1574|6.17|4.87|1.31	0	.
chr1	138544800	138551999	DM_H3K27me3_cKO_DEseq2_up_1575|6.32|5.09|1.23	0	.
chr1	75842600	75846399	DM_H3K27me3_cKO_DEseq2_up_1576|5.06|2.68|2.38	0	.
chr2	93194200	93198599	DM_H3K27me3_cKO_DEseq2_up_1577|5.23|3.31|1.93	0	.
chr7	70637000	70640599	DM_H3K27me3_cKO_DEseq2_up_1578|5.13|2.98|2.15	0	.
chr15	89019800	89030799	DM_H3K27me3_cKO_DEseq2_up_1579|6.56|5.44|1.12	0	.
chr11	120215800	120223199	DM_H3K27me3_cKO_DEseq2_up_1580|6.37|5.17|1.2	0	.
chr11	16638400	16643399	DM_H3K27me3_cKO_DEseq2_up_1581|5.68|4.07|1.61	0	.
chr10	4300800	4306399	DM_H3K27me3_cKO_DEseq2_up_1582|5.73|4.12|1.61	0	.
chr3	84331400	84356599	DM_H3K27me3_cKO_DEseq2_up_1583|8.05|7.28|0.78	0	.
chr11	88374600	88381199	DM_H3K27me3_cKO_DEseq2_up_1584|6.07|4.63|1.43	0	.
chr1	77616200	77619799	DM_H3K27me3_cKO_DEseq2_up_1585|5.16|3.16|2.01	0	.
chr16	42961800	42965399	DM_H3K27me3_cKO_DEseq2_up_1586|5.16|2.98|2.18	0	.
chr10	104088600	104093799	DM_H3K27me3_cKO_DEseq2_up_1587|5.25|3.3|1.95	0	.
chr6	73528800	73534999	DM_H3K27me3_cKO_DEseq2_up_1588|5.87|4.45|1.42	0	.
chr15	84730800	84737399	DM_H3K27me3_cKO_DEseq2_up_1589|5.93|4.51|1.42	0	.
chr2	29536200	29538599	DM_H3K27me3_cKO_DEseq2_up_1590|4.71|1.99|2.73	0	.
chr14	75530000	75545199	DM_H3K27me3_cKO_DEseq2_up_1591|7.27|6.27|1	0	.
chr10	116983400	116987599	DM_H3K27me3_cKO_DEseq2_up_1592|5.43|3.69|1.74	0	.
chr5	120371000	120378599	DM_H3K27me3_cKO_DEseq2_up_1593|5.91|4.41|1.5	0	.
chr2	35320600	35337599	DM_H3K27me3_cKO_DEseq2_up_1594|7.54|6.69|0.85	0	.
chr12	30329400	30333799	DM_H3K27me3_cKO_DEseq2_up_1595|5.17|3.16|2.01	0	.
chr13	73417600	73423599	DM_H3K27me3_cKO_DEseq2_up_1596|6.3|5.01|1.28	0	.
chr19	55966600	55973199	DM_H3K27me3_cKO_DEseq2_up_1597|6.11|4.82|1.29	0	.
chr17	29813600	29815799	DM_H3K27me3_cKO_DEseq2_up_1598|4.65|1.79|2.86	0	.
chr2	164924200	164932199	DM_H3K27me3_cKO_DEseq2_up_1599|6.08|4.64|1.45	0	.
chr2	52844600	52848799	DM_H3K27me3_cKO_DEseq2_up_1600|5.56|3.8|1.76	0	.
chr8	87751200	87759999	DM_H3K27me3_cKO_DEseq2_up_1601|6.67|5.56|1.11	0	.
chr8	17774800	17777599	DM_H3K27me3_cKO_DEseq2_up_1602|4.79|2.16|2.64	0	.
chr8	78147400	78165999	DM_H3K27me3_cKO_DEseq2_up_1603|7.68|6.83|0.85	0	.
chr9	19146600	19150599	DM_H3K27me3_cKO_DEseq2_up_1604|5.02|2.69|2.32	0	.
chr10	123686400	123693999	DM_H3K27me3_cKO_DEseq2_up_1605|6.05|4.71|1.34	0	.
chr18	86859800	86865599	DM_H3K27me3_cKO_DEseq2_up_1606|5.6|3.98|1.62	0	.
chr1	182247000	182254399	DM_H3K27me3_cKO_DEseq2_up_1607|6.45|5.33|1.13	0	.
chr2	93265800	93286599	DM_H3K27me3_cKO_DEseq2_up_1608|7.83|7|0.83	0	.
chr5	39341000	39347599	DM_H3K27me3_cKO_DEseq2_up_1609|5.94|4.57|1.37	0	.
chr17	39849200	39857599	DM_H3K27me3_cKO_DEseq2_up_1610|6.46|5.25|1.22	0	.
chr2	18626000	18633399	DM_H3K27me3_cKO_DEseq2_up_1611|6.2|4.89|1.31	0	.
chr8	88055200	88065599	DM_H3K27me3_cKO_DEseq2_up_1612|6.64|5.51|1.13	0	.
chr1	61139200	61149199	DM_H3K27me3_cKO_DEseq2_up_1613|6.98|5.93|1.05	0	.
chr9	61319200	61352999	DM_H3K27me3_cKO_DEseq2_up_1614|8.59|7.81|0.77	0	.
chr8	79990600	80001599	DM_H3K27me3_cKO_DEseq2_up_1615|6.88|5.88|1	0	.
chr19	28365800	28370599	DM_H3K27me3_cKO_DEseq2_up_1616|5.64|4.03|1.61	0	.
chr14	118285800	118293999	DM_H3K27me3_cKO_DEseq2_up_1617|6.13|4.84|1.28	0	.
chr16	35514200	35534199	DM_H3K27me3_cKO_DEseq2_up_1618|7.72|6.85|0.87	0	.
chr5	41907600	41911399	DM_H3K27me3_cKO_DEseq2_up_1619|5.08|2.99|2.1	0	.
chr5	106121200	106126199	DM_H3K27me3_cKO_DEseq2_up_1620|5.78|4.31|1.47	0	.
chr11	25176400	25184199	DM_H3K27me3_cKO_DEseq2_up_1621|5.98|4.57|1.41	0	.
chr9	35033000	35037599	DM_H3K27me3_cKO_DEseq2_up_1622|5.18|3.07|2.12	0	.
chr7	130163600	130170399	DM_H3K27me3_cKO_DEseq2_up_1623|6.21|4.86|1.35	0	.
chr9	64349400	64351599	DM_H3K27me3_cKO_DEseq2_up_1624|4.46|0.98|3.48	0	.
chr16	90915400	90920599	DM_H3K27me3_cKO_DEseq2_up_1625|5.94|4.54|1.4	0	.
chr3	137777600	137782199	DM_H3K27me3_cKO_DEseq2_up_1626|5.94|4.54|1.4	0	.
chr16	51404200	51407399	DM_H3K27me3_cKO_DEseq2_up_1627|4.93|2.32|2.61	0	.
chr12	56823800	56829599	DM_H3K27me3_cKO_DEseq2_up_1628|5.86|4.38|1.48	0	.
chr7	115056200	115068599	DM_H3K27me3_cKO_DEseq2_up_1629|7.05|6.1|0.95	0	.
chr5	126739400	126741999	DM_H3K27me3_cKO_DEseq2_up_1630|4.84|2.31|2.52	0	.
chr2	64088000	64109599	DM_H3K27me3_cKO_DEseq2_up_1631|7.86|7.03|0.83	0	.
chr4	32133000	32143599	DM_H3K27me3_cKO_DEseq2_up_1632|6.43|5.29|1.14	0	.
chr3	152260000	152265599	DM_H3K27me3_cKO_DEseq2_up_1633|6.06|4.66|1.39	0	.
chr7	25871400	25875799	DM_H3K27me3_cKO_DEseq2_up_1634|4.97|2.69|2.29	0	.
chr12	78143400	78151399	DM_H3K27me3_cKO_DEseq2_up_1635|6.04|4.63|1.41	0	.
chr7	133548600	133553599	DM_H3K27me3_cKO_DEseq2_up_1636|5.53|3.89|1.63	0	.
chr12	91378000	91380999	DM_H3K27me3_cKO_DEseq2_up_1637|4.73|1.78|2.95	0	.
chr10	112971800	112975199	DM_H3K27me3_cKO_DEseq2_up_1638|5.05|2.89|2.16	0	.
chr12	53717200	53727399	DM_H3K27me3_cKO_DEseq2_up_1639|6.71|5.67|1.04	0	.
chr16	42838000	42841599	DM_H3K27me3_cKO_DEseq2_up_1640|5|2.68|2.33	0	.
chr12	55566200	55568799	DM_H3K27me3_cKO_DEseq2_up_1641|4.66|1.79|2.86	0	.
chr3	38660600	38670399	DM_H3K27me3_cKO_DEseq2_up_1642|6.44|5.31|1.13	0	.
chr14	97084400	97087199	DM_H3K27me3_cKO_DEseq2_up_1643|4.89|2.44|2.46	0	.
chr4	29659000	29662999	DM_H3K27me3_cKO_DEseq2_up_1644|5.07|2.99|2.09	0	.
chr10	61921800	61924199	DM_H3K27me3_cKO_DEseq2_up_1645|4.44|0.99|3.46	0	.
chr4	69235400	69238599	DM_H3K27me3_cKO_DEseq2_up_1646|5.05|2.89|2.17	0	.
chr11	46614200	46616999	DM_H3K27me3_cKO_DEseq2_up_1647|4.54|1.32|3.23	0	.
chr12	15603400	15607399	DM_H3K27me3_cKO_DEseq2_up_1648|4.94|2.45|2.49	0	.
chr2	27355200	27360599	DM_H3K27me3_cKO_DEseq2_up_1649|5.58|3.8|1.78	0	.
chr3	142231800	142242199	DM_H3K27me3_cKO_DEseq2_up_1650|6.62|5.4|1.22	0	.
chr2	172888600	172892799	DM_H3K27me3_cKO_DEseq2_up_1651|5.23|3.08|2.15	0	.
chr7	68438000	68447199	DM_H3K27me3_cKO_DEseq2_up_1652|6.5|5.34|1.15	0	.
chr9	22995400	23001199	DM_H3K27me3_cKO_DEseq2_up_1653|5.86|4.41|1.45	0	.
chr12	67885000	67887599	DM_H3K27me3_cKO_DEseq2_up_1654|4.78|2.15|2.63	0	.
chr11	71390000	71397799	DM_H3K27me3_cKO_DEseq2_up_1655|6|4.6|1.4	0	.
chr7	36074400	36078599	DM_H3K27me3_cKO_DEseq2_up_1656|5.74|4.15|1.59	0	.
chr8	47346800	47357199	DM_H3K27me3_cKO_DEseq2_up_1657|7.04|6.08|0.96	0	.
chr5	145656600	145684599	DM_H3K27me3_cKO_DEseq2_up_1658|8.3|7.45|0.85	0	.
chr9	98665400	98673999	DM_H3K27me3_cKO_DEseq2_up_1659|6.41|5.14|1.27	0	.
chr4	140624800	140627599	DM_H3K27me3_cKO_DEseq2_up_1660|4.8|2.15|2.65	0	.
chr2	78041800	78045199	DM_H3K27me3_cKO_DEseq2_up_1661|4.73|1.98|2.75	0	.
chr14	60685400	60697199	DM_H3K27me3_cKO_DEseq2_up_1662|7.03|6.08|0.94	0	.
chr8	118651000	118656399	DM_H3K27me3_cKO_DEseq2_up_1663|5.73|4.02|1.71	0	.
chr7	137600800	137615599	DM_H3K27me3_cKO_DEseq2_up_1664|7.5|6.61|0.89	0	.
chr1	179445200	179449199	DM_H3K27me3_cKO_DEseq2_up_1665|5.3|3.15|2.15	0	.
chr10	94340400	94351799	DM_H3K27me3_cKO_DEseq2_up_1666|6.91|5.87|1.04	0	.
chr3	54818800	54823199	DM_H3K27me3_cKO_DEseq2_up_1667|5.34|3.51|1.83	0	.
chr6	127070000	127075599	DM_H3K27me3_cKO_DEseq2_up_1668|5.74|4.2|1.54	0	.
chr12	71426400	71428399	DM_H3K27me3_cKO_DEseq2_up_1669|4.35|-0.01|4.37	0	.
chr15	8000800	8003199	DM_H3K27me3_cKO_DEseq2_up_1670|4.62|1.58|3.04	0	.
chr14	60527600	60536799	DM_H3K27me3_cKO_DEseq2_up_1671|6.76|5.71|1.05	0	.
chr9	119141600	119145599	DM_H3K27me3_cKO_DEseq2_up_1672|4.85|2.14|2.71	0	.
chr2	174816200	174827999	DM_H3K27me3_cKO_DEseq2_up_1673|6.74|5.67|1.06	0	.
chr9	38287200	38290199	DM_H3K27me3_cKO_DEseq2_up_1674|4.61|1.56|3.05	0	.
chr9	74144000	74158599	DM_H3K27me3_cKO_DEseq2_up_1675|7.38|6.51|0.87	0	.
chr8	86915200	86918799	DM_H3K27me3_cKO_DEseq2_up_1676|4.94|2.58|2.36	0	.
chr7	43431600	43435799	DM_H3K27me3_cKO_DEseq2_up_1677|5.14|3.16|1.99	0	.
chr17	67864800	67867599	DM_H3K27me3_cKO_DEseq2_up_1678|5.34|3.51|1.84	0	.
chr8	10720600	10722999	DM_H3K27me3_cKO_DEseq2_up_1679|4.64|1.79|2.84	0	.
chr12	53444800	53449399	DM_H3K27me3_cKO_DEseq2_up_1680|5.81|4.38|1.44	0	.
chr2	59808800	59821199	DM_H3K27me3_cKO_DEseq2_up_1681|7.01|5.98|1.02	0	.
chr5	92709600	92713199	DM_H3K27me3_cKO_DEseq2_up_1682|5.24|3.24|2	0	.
chr8	109159000	109161799	DM_H3K27me3_cKO_DEseq2_up_1683|4.79|2.15|2.64	0	.
chr17	69396200	69402199	DM_H3K27me3_cKO_DEseq2_up_1684|5.65|3.9|1.75	0	.
chr5	74914800	74916799	DM_H3K27me3_cKO_DEseq2_up_1685|4.32|-0.01|4.33	0	.
chr10	30843000	30849999	DM_H3K27me3_cKO_DEseq2_up_1686|6.45|5.31|1.14	0	.
chr8	108709000	108724599	DM_H3K27me3_cKO_DEseq2_up_1687|7.77|6.94|0.83	0	.
chr5	111750400	111754599	DM_H3K27me3_cKO_DEseq2_up_1688|5.62|4.07|1.55	0	.
chr2	61340800	61356999	DM_H3K27me3_cKO_DEseq2_up_1689|7.51|6.66|0.85	0	.
chr7	71019800	71027199	DM_H3K27me3_cKO_DEseq2_up_1690|6.32|5.11|1.2	0	.
chr19	48948000	48952199	DM_H3K27me3_cKO_DEseq2_up_1691|5.03|2.8|2.24	0	.
chr6	73148600	73158399	DM_H3K27me3_cKO_DEseq2_up_1692|6.33|5.13|1.19	0	.
chr3	27898400	27907799	DM_H3K27me3_cKO_DEseq2_up_1693|6.11|4.71|1.4	0	.
chr19	18566400	18569799	DM_H3K27me3_cKO_DEseq2_up_1694|4.9|2.57|2.33	0	.
chr1	180880400	180884999	DM_H3K27me3_cKO_DEseq2_up_1695|5.35|3.57|1.78	0	.
chr7	134819400	134829799	DM_H3K27me3_cKO_DEseq2_up_1696|6.82|5.82|1	0	.
chr5	22020200	22039999	DM_H3K27me3_cKO_DEseq2_up_1697|7.43|6.51|0.91	0	.
chr11	103452800	103458399	DM_H3K27me3_cKO_DEseq2_up_1698|5.6|4.03|1.57	0	.
chr6	36623600	36627599	DM_H3K27me3_cKO_DEseq2_up_1699|5.07|2.99|2.08	0	.
chr8	126251000	126253799	DM_H3K27me3_cKO_DEseq2_up_1700|4.76|1.97|2.79	0	.
chr19	43637200	43640799	DM_H3K27me3_cKO_DEseq2_up_1701|5.06|2.44|2.62	0	.
chr3	97928400	97940599	DM_H3K27me3_cKO_DEseq2_up_1702|6.96|5.95|1	0	.
chr15	101710200	101718399	DM_H3K27me3_cKO_DEseq2_up_1703|6.13|4.84|1.28	0	.
chr14	18946800	18951399	DM_H3K27me3_cKO_DEseq2_up_1704|5.21|3.06|2.14	0	.
chr6	143734400	143741999	DM_H3K27me3_cKO_DEseq2_up_1705|5.81|4.31|1.51	0	.
chr4	107472800	107481599	DM_H3K27me3_cKO_DEseq2_up_1706|6.44|5.23|1.2	0	.
chr19	24137600	24144399	DM_H3K27me3_cKO_DEseq2_up_1707|5.77|4.15|1.62	0	.
chr16	24351400	24355999	DM_H3K27me3_cKO_DEseq2_up_1708|5.38|3.57|1.8	0	.
chr12	109499400	109513999	DM_H3K27me3_cKO_DEseq2_up_1709|7.44|6.59|0.86	0	.
chr18	46464600	46468799	DM_H3K27me3_cKO_DEseq2_up_1710|5.57|3.99|1.58	0	.
chr13	56826200	56840399	DM_H3K27me3_cKO_DEseq2_up_1711|7.32|6.42|0.9	0	.
chr11	101782800	101793599	DM_H3K27me3_cKO_DEseq2_up_1712|6.9|5.91|0.99	0	.
chr11	66052800	66060199	DM_H3K27me3_cKO_DEseq2_up_1713|5.97|4.54|1.43	0	.
chr2	49935800	49941599	DM_H3K27me3_cKO_DEseq2_up_1714|5.81|4.38|1.44	0	.
chr17	27162600	27164999	DM_H3K27me3_cKO_DEseq2_up_1715|4.81|2.31|2.5	0	.
chr6	136995400	136999199	DM_H3K27me3_cKO_DEseq2_up_1716|5.62|3.93|1.69	0	.
chr13	38744800	38750799	DM_H3K27me3_cKO_DEseq2_up_1717|5.38|3.63|1.75	0	.
chr9	119477000	119484799	DM_H3K27me3_cKO_DEseq2_up_1718|6.43|5.27|1.16	0	.
chr18	55343800	55371399	DM_H3K27me3_cKO_DEseq2_up_1719|8.05|7.26|0.79	0	.
chr6	53426200	53445399	DM_H3K27me3_cKO_DEseq2_up_1720|7.78|6.95|0.83	0	.
chr11	59565000	59577399	DM_H3K27me3_cKO_DEseq2_up_1721|7.13|6.17|0.95	0	.
chr14	98099600	98102799	DM_H3K27me3_cKO_DEseq2_up_1722|4.82|2.3|2.52	0	.
chr6	135039600	135043799	DM_H3K27me3_cKO_DEseq2_up_1723|5.56|3.84|1.73	0	.
chr8	125698800	125709399	DM_H3K27me3_cKO_DEseq2_up_1724|6.84|5.78|1.05	0	.
chr5	133107000	133110999	DM_H3K27me3_cKO_DEseq2_up_1725|5.25|3.38|1.87	0	.
chr10	126423400	126429599	DM_H3K27me3_cKO_DEseq2_up_1726|5.82|4.35|1.48	0	.
chr6	106744600	106747199	DM_H3K27me3_cKO_DEseq2_up_1727|4.63|1.79|2.83	0	.
chr10	91296000	91301199	DM_H3K27me3_cKO_DEseq2_up_1728|5.61|3.99|1.62	0	.
chr8	8874600	8878199	DM_H3K27me3_cKO_DEseq2_up_1729|5.16|3.15|2	0	.
chr18	55084800	55098999	DM_H3K27me3_cKO_DEseq2_up_1730|7.23|6.3|0.94	0	.
chr15	38558000	38562599	DM_H3K27me3_cKO_DEseq2_up_1731|5.35|3.57|1.79	0	.
chr14	76252400	76263199	DM_H3K27me3_cKO_DEseq2_up_1732|7.24|6.34|0.9	0	.
chr2	173640200	173649599	DM_H3K27me3_cKO_DEseq2_up_1733|6.68|5.57|1.11	0	.
chr11	114238200	114249799	DM_H3K27me3_cKO_DEseq2_up_1734|6.67|5.54|1.12	0	.
chr6	22016600	22021199	DM_H3K27me3_cKO_DEseq2_up_1735|5.49|3.62|1.87	0	.
chr2	157068400	157074999	DM_H3K27me3_cKO_DEseq2_up_1736|5.93|4.47|1.45	0	.
chr3	128120000	128124799	DM_H3K27me3_cKO_DEseq2_up_1737|5.59|3.99|1.6	0	.
chr7	71220000	71232199	DM_H3K27me3_cKO_DEseq2_up_1738|6.56|5.41|1.15	0	.
chr4	94082200	94089599	DM_H3K27me3_cKO_DEseq2_up_1739|6.06|4.66|1.4	0	.
chr5	47035600	47040399	DM_H3K27me3_cKO_DEseq2_up_1740|5.38|3.57|1.82	0	.
chr8	105268400	105271799	DM_H3K27me3_cKO_DEseq2_up_1741|4.92|2.32|2.6	0	.
chr16	44576800	44583999	DM_H3K27me3_cKO_DEseq2_up_1742|6.04|4.74|1.3	0	.
chr13	11118600	11121999	DM_H3K27me3_cKO_DEseq2_up_1743|5.04|2.89|2.15	0	.
chr2	93937400	93945199	DM_H3K27me3_cKO_DEseq2_up_1744|6.17|4.92|1.25	0	.
chr17	49367200	49373199	DM_H3K27me3_cKO_DEseq2_up_1745|5.64|4.07|1.57	0	.
chr12	43400000	43406599	DM_H3K27me3_cKO_DEseq2_up_1746|5.54|3.85|1.69	0	.
chr11	87995600	88000799	DM_H3K27me3_cKO_DEseq2_up_1747|5.4|3.68|1.72	0	.
chr6	73115800	73122199	DM_H3K27me3_cKO_DEseq2_up_1748|5.86|4.45|1.42	0	.
chr1	57324800	57329599	DM_H3K27me3_cKO_DEseq2_up_1749|5.94|4.6|1.34	0	.
chr4	124358600	124365399	DM_H3K27me3_cKO_DEseq2_up_1750|6.35|5.18|1.17	0	.
chr19	59623000	59640999	DM_H3K27me3_cKO_DEseq2_up_1751|7.64|6.83|0.8	0	.
chr8	128586400	128590799	DM_H3K27me3_cKO_DEseq2_up_1752|5.28|3.44|1.84	0	.
chr16	30298600	30305199	DM_H3K27me3_cKO_DEseq2_up_1753|6.01|4.69|1.33	0	.
chr17	83061000	83086599	DM_H3K27me3_cKO_DEseq2_up_1754|8.08|7.27|0.81	0	.
chr18	66096200	66105399	DM_H3K27me3_cKO_DEseq2_up_1755|6.5|5.36|1.14	0	.
chr9	46479400	46483799	DM_H3K27me3_cKO_DEseq2_up_1756|5.86|4.35|1.51	0	.
chr13	13465600	13476399	DM_H3K27me3_cKO_DEseq2_up_1757|6.33|5.13|1.19	0	.
chr14	27064200	27070199	DM_H3K27me3_cKO_DEseq2_up_1758|5.81|4.38|1.43	0	.
chr5	86460000	86470399	DM_H3K27me3_cKO_DEseq2_up_1759|6.66|5.58|1.07	0	.
chr4	129393200	129403199	DM_H3K27me3_cKO_DEseq2_up_1760|6.55|5.46|1.09	0	.
chr1	57152200	57161599	DM_H3K27me3_cKO_DEseq2_up_1761|6.37|5.16|1.21	0	.
chr13	102565600	102570999	DM_H3K27me3_cKO_DEseq2_up_1762|5.58|3.93|1.65	0	.
chr5	13738200	13742799	DM_H3K27me3_cKO_DEseq2_up_1763|5.35|3.45|1.9	0	.
chr9	101518800	101521999	DM_H3K27me3_cKO_DEseq2_up_1764|5.14|3.15|1.98	0	.
chr14	99584000	99587599	DM_H3K27me3_cKO_DEseq2_up_1765|4.98|2.79|2.19	0	.
chr6	121335000	121347599	DM_H3K27me3_cKO_DEseq2_up_1766|7.05|6.08|0.96	0	.
chr10	87155200	87158599	DM_H3K27me3_cKO_DEseq2_up_1767|4.75|2.16|2.59	0	.
chr6	58313800	58318999	DM_H3K27me3_cKO_DEseq2_up_1768|5.46|3.79|1.66	0	.
chr14	67443000	67451799	DM_H3K27me3_cKO_DEseq2_up_1769|6.18|4.8|1.38	0	.
chr1	20404800	20411199	DM_H3K27me3_cKO_DEseq2_up_1770|5.86|4.41|1.45	0	.
chr11	66342800	66346399	DM_H3K27me3_cKO_DEseq2_up_1771|4.93|2.56|2.37	0	.
chr19	42320400	42325199	DM_H3K27me3_cKO_DEseq2_up_1772|5.32|3.44|1.88	0	.
chr14	105978200	105983199	DM_H3K27me3_cKO_DEseq2_up_1773|5.38|3.63|1.75	0	.
chr9	120146400	120152199	DM_H3K27me3_cKO_DEseq2_up_1774|5.57|3.9|1.68	0	.
chr2	18036400	18043399	DM_H3K27me3_cKO_DEseq2_up_1775|6.5|5.29|1.22	0	.
chr2	159020000	159033599	DM_H3K27me3_cKO_DEseq2_up_1776|7|6.06|0.94	0	.
chr19	44531200	44535999	DM_H3K27me3_cKO_DEseq2_up_1777|5.42|3.63|1.79	0	.
chr9	90487000	90492399	DM_H3K27me3_cKO_DEseq2_up_1778|5.51|3.84|1.67	0	.
chr5	42457000	42463199	DM_H3K27me3_cKO_DEseq2_up_1779|5.82|4.34|1.48	0	.
chr8	114451600	114463399	DM_H3K27me3_cKO_DEseq2_up_1780|6.81|5.75|1.06	0	.
chr2	109844800	109849599	DM_H3K27me3_cKO_DEseq2_up_1781|5.44|3.74|1.7	0	.
chr5	101435800	101439799	DM_H3K27me3_cKO_DEseq2_up_1782|5.93|4.57|1.36	0	.
chr17	29908800	29943599	DM_H3K27me3_cKO_DEseq2_up_1783|8.36|7.59|0.77	0	.
chr10	60785600	60789399	DM_H3K27me3_cKO_DEseq2_up_1784|5.29|3.44|1.85	0	.
chr12	72434600	72445999	DM_H3K27me3_cKO_DEseq2_up_1785|7.23|6.27|0.96	0	.
chr8	116522600	116530999	DM_H3K27me3_cKO_DEseq2_up_1786|6.21|4.91|1.29	0	.
chr10	43601800	43609199	DM_H3K27me3_cKO_DEseq2_up_1787|6.23|4.99|1.24	0	.
chr4	47418000	47428399	DM_H3K27me3_cKO_DEseq2_up_1788|6.52|5.38|1.14	0	.
chr8	87877600	87882599	DM_H3K27me3_cKO_DEseq2_up_1789|5.56|3.75|1.81	0	.
chr7	115030600	115036199	DM_H3K27me3_cKO_DEseq2_up_1790|5.4|3.63|1.78	0	.
chr2	157895800	157901399	DM_H3K27me3_cKO_DEseq2_up_1791|5.81|4.38|1.43	0	.
chr9	14875200	14877999	DM_H3K27me3_cKO_DEseq2_up_1792|4.8|2.31|2.49	0	.
chr9	34755600	34760199	DM_H3K27me3_cKO_DEseq2_up_1793|5.61|4.07|1.54	0	.
chr1	36118600	36122999	DM_H3K27me3_cKO_DEseq2_up_1794|5.35|3.57|1.78	0	.
chr2	63987800	63999399	DM_H3K27me3_cKO_DEseq2_up_1795|6.81|5.79|1.02	0	.
chr2	10604800	10610999	DM_H3K27me3_cKO_DEseq2_up_1796|5.84|4.44|1.4	0	.
chr6	90607600	90617599	DM_H3K27me3_cKO_DEseq2_up_1797|6.52|5.19|1.33	0	.
chr9	118176800	118181999	DM_H3K27me3_cKO_DEseq2_up_1798|5.38|3.63|1.75	0	.
chr9	60744600	60747399	DM_H3K27me3_cKO_DEseq2_up_1799|4.91|2.45|2.46	0	.
chr2	57775000	57786599	DM_H3K27me3_cKO_DEseq2_up_1800|6.71|5.69|1.02	0	.
chr17	28546400	28549399	DM_H3K27me3_cKO_DEseq2_up_1801|4.93|2.68|2.25	0	.
chr13	43974800	43977399	DM_H3K27me3_cKO_DEseq2_up_1802|4.62|1.79|2.82	0	.
chr16	36533400	36537999	DM_H3K27me3_cKO_DEseq2_up_1803|5.04|2.68|2.37	0	.
chr6	81593800	81598799	DM_H3K27me3_cKO_DEseq2_up_1804|5.48|3.84|1.63	0	.
chr7	130615400	130619199	DM_H3K27me3_cKO_DEseq2_up_1805|5.19|3.23|1.96	0	.
chr8	48804600	48824999	DM_H3K27me3_cKO_DEseq2_up_1806|7.76|6.96|0.8	0	.
chr14	28775000	28780199	DM_H3K27me3_cKO_DEseq2_up_1807|5.51|3.89|1.62	0	.
chr6	4545000	4556799	DM_H3K27me3_cKO_DEseq2_up_1808|7.05|6.08|0.97	0	.
chr9	58211800	58217399	DM_H3K27me3_cKO_DEseq2_up_1809|5.58|3.94|1.64	0	.
chr10	78478400	78485199	DM_H3K27me3_cKO_DEseq2_up_1810|6.07|4.74|1.33	0	.
chr8	51066800	51069799	DM_H3K27me3_cKO_DEseq2_up_1811|4.79|2.31|2.48	0	.
chr11	11870000	11875399	DM_H3K27me3_cKO_DEseq2_up_1812|5.75|4.27|1.48	0	.
chr4	105172600	105196599	DM_H3K27me3_cKO_DEseq2_up_1813|8.07|7.26|0.8	0	.
chr4	139993800	140006799	DM_H3K27me3_cKO_DEseq2_up_1814|6.94|5.94|1	0	.
chr1	43406800	43409999	DM_H3K27me3_cKO_DEseq2_up_1815|4.94|2.58|2.36	0	.
chr3	130677400	130686999	DM_H3K27me3_cKO_DEseq2_up_1816|6.55|5.45|1.11	0	.
chr1	128795600	128815599	DM_H3K27me3_cKO_DEseq2_up_1817|7.84|7.02|0.82	0	.
chr5	120738400	120743199	DM_H3K27me3_cKO_DEseq2_up_1818|5.26|3.24|2.02	0	.
chr2	170551800	170556399	DM_H3K27me3_cKO_DEseq2_up_1819|5.35|3.57|1.78	0	.
chr4	124044400	124055599	DM_H3K27me3_cKO_DEseq2_up_1820|6.64|5.59|1.06	0	.
chr8	120454800	120456999	DM_H3K27me3_cKO_DEseq2_up_1821|4.42|0.99|3.43	0	.
chr3	116039200	116043399	DM_H3K27me3_cKO_DEseq2_up_1822|5.34|3.45|1.89	0	.
chr2	125351400	125357999	DM_H3K27me3_cKO_DEseq2_up_1823|5.65|3.98|1.67	0	.
chr1	119011600	119016599	DM_H3K27me3_cKO_DEseq2_up_1824|5.55|3.94|1.61	0	.
chr2	171980200	171987999	DM_H3K27me3_cKO_DEseq2_up_1825|6.58|5.39|1.19	0	.
chr3	136240000	136245399	DM_H3K27me3_cKO_DEseq2_up_1826|5.4|3.63|1.77	0	.
chr9	49273000	49280399	DM_H3K27me3_cKO_DEseq2_up_1827|6.37|5.19|1.17	0	.
chr17	12461200	12465799	DM_H3K27me3_cKO_DEseq2_up_1828|5.46|3.74|1.72	0	.
chr11	88233800	88244399	DM_H3K27me3_cKO_DEseq2_up_1829|6.7|5.63|1.07	0	.
chr3	123127000	123133799	DM_H3K27me3_cKO_DEseq2_up_1830|5.82|4.37|1.44	0	.
chr4	153164200	153168799	DM_H3K27me3_cKO_DEseq2_up_1831|5.49|3.84|1.65	0	.
chr3	16725400	16729599	DM_H3K27me3_cKO_DEseq2_up_1832|5.11|3.07|2.05	0	.
chr19	55591600	55595599	DM_H3K27me3_cKO_DEseq2_up_1833|5.81|4.41|1.4	0	.
chr1	156173600	156199199	DM_H3K27me3_cKO_DEseq2_up_1834|8.1|7.31|0.78	0	.
chr12	78063200	78070799	DM_H3K27me3_cKO_DEseq2_up_1835|6.17|4.91|1.26	0	.
chr6	53246200	53255999	DM_H3K27me3_cKO_DEseq2_up_1836|6.61|5.5|1.12	0	.
chr2	75534000	75540199	DM_H3K27me3_cKO_DEseq2_up_1837|5.98|4.57|1.41	0	.
chr18	54660000	54665199	DM_H3K27me3_cKO_DEseq2_up_1838|5.44|3.74|1.7	0	.
chr7	131797800	131808199	DM_H3K27me3_cKO_DEseq2_up_1839|6.81|5.81|1	0	.
chr18	34560000	34563599	DM_H3K27me3_cKO_DEseq2_up_1840|4.97|2.69|2.28	0	.
chr15	37799000	37804799	DM_H3K27me3_cKO_DEseq2_up_1841|5.64|3.95|1.7	0	.
chr3	34420000	34426599	DM_H3K27me3_cKO_DEseq2_up_1842|6.32|5.14|1.18	0	.
chr5	113629000	113633799	DM_H3K27me3_cKO_DEseq2_up_1843|5.23|3.31|1.92	0	.
chr15	96133800	96136399	DM_H3K27me3_cKO_DEseq2_up_1844|5.11|3.07|2.04	0	.
chr5	147788400	147796399	DM_H3K27me3_cKO_DEseq2_up_1845|6.34|5.19|1.15	0	.
chr8	114967800	114995599	DM_H3K27me3_cKO_DEseq2_up_1846|8.37|7.62|0.75	0	.
chr12	13623800	13628999	DM_H3K27me3_cKO_DEseq2_up_1847|5.6|4.07|1.53	0	.
chr8	24296000	24299999	DM_H3K27me3_cKO_DEseq2_up_1848|5.33|3.51|1.81	0	.
chr12	11206400	11210599	DM_H3K27me3_cKO_DEseq2_up_1849|5.84|4.41|1.43	0	.
chr2	74614800	74625199	DM_H3K27me3_cKO_DEseq2_up_1850|6.68|5.6|1.08	0	.
chr11	85978400	85981399	DM_H3K27me3_cKO_DEseq2_up_1851|4.77|2|2.77	0	.
chr3	143927000	143929799	DM_H3K27me3_cKO_DEseq2_up_1852|4.68|1.8|2.87	0	.
chr2	158273200	158284599	DM_H3K27me3_cKO_DEseq2_up_1853|6.66|5.58|1.07	0	.
chr10	40335800	40340999	DM_H3K27me3_cKO_DEseq2_up_1854|5.67|4.16|1.51	0	.
chr19	21142200	21146399	DM_H3K27me3_cKO_DEseq2_up_1855|5.89|4.54|1.35	0	.
chr15	88074800	88093799	DM_H3K27me3_cKO_DEseq2_up_1856|7.72|6.82|0.9	0	.
chr3	15522000	15530399	DM_H3K27me3_cKO_DEseq2_up_1857|6.28|5.12|1.17	0	.
chr8	68078000	68081999	DM_H3K27me3_cKO_DEseq2_up_1858|5.06|2.98|2.08	0	.
chr7	36500000	36503799	DM_H3K27me3_cKO_DEseq2_up_1859|5.03|2.7|2.34	0	.
chr7	113816600	113819799	DM_H3K27me3_cKO_DEseq2_up_1860|5.02|2.68|2.34	0	.
chr14	51294400	51297399	DM_H3K27me3_cKO_DEseq2_up_1861|4.64|1.79|2.84	0	.
chr3	124352600	124356799	DM_H3K27me3_cKO_DEseq2_up_1862|5.09|3.07|2.02	0	.
chr16	72473200	72475999	DM_H3K27me3_cKO_DEseq2_up_1863|4.79|2.31|2.48	0	.
chr6	22496400	22499799	DM_H3K27me3_cKO_DEseq2_up_1864|4.79|2.31|2.48	0	.
chr9	11458400	11463799	DM_H3K27me3_cKO_DEseq2_up_1865|5.57|3.94|1.63	0	.
chr14	98017800	98024999	DM_H3K27me3_cKO_DEseq2_up_1866|5.8|4.27|1.54	0	.
chr4	119021600	119029999	DM_H3K27me3_cKO_DEseq2_up_1867|6.53|5.41|1.11	0	.
chr2	45168800	45173599	DM_H3K27me3_cKO_DEseq2_up_1868|5.51|3.9|1.62	0	.
chr9	46657400	46665999	DM_H3K27me3_cKO_DEseq2_up_1869|6.47|5.34|1.13	0	.
chr9	116149800	116152399	DM_H3K27me3_cKO_DEseq2_up_1870|4.94|2.69|2.25	0	.
chr8	23436200	23447599	DM_H3K27me3_cKO_DEseq2_up_1871|6.68|5.53|1.15	0	.
chr12	64898000	64903199	DM_H3K27me3_cKO_DEseq2_up_1872|5.44|3.62|1.82	0	.
chr4	12662200	12666999	DM_H3K27me3_cKO_DEseq2_up_1873|5.27|3.3|1.97	0	.
chr19	16522000	16527199	DM_H3K27me3_cKO_DEseq2_up_1874|5.41|3.69|1.72	0	.
chr2	17523600	17527999	DM_H3K27me3_cKO_DEseq2_up_1875|5.43|3.69|1.75	0	.
chr2	34896400	34900799	DM_H3K27me3_cKO_DEseq2_up_1876|5.31|3.51|1.81	0	.
chr5	118767600	118770599	DM_H3K27me3_cKO_DEseq2_up_1877|5.16|3.23|1.92	0	.
chr6	71096000	71102799	DM_H3K27me3_cKO_DEseq2_up_1878|6.26|5.07|1.19	0	.
chr4	87382600	87387599	DM_H3K27me3_cKO_DEseq2_up_1879|5.7|4.12|1.58	0	.
chr2	157033200	157036399	DM_H3K27me3_cKO_DEseq2_up_1880|4.97|2.79|2.19	0	.
chr13	13575600	13580399	DM_H3K27me3_cKO_DEseq2_up_1881|5.62|3.98|1.64	0	.
chr12	60939000	60945399	DM_H3K27me3_cKO_DEseq2_up_1882|5.69|4.2|1.49	0	.
chr6	137069200	137071799	DM_H3K27me3_cKO_DEseq2_up_1883|4.74|1.97|2.76	0	.
chr2	74140600	74142799	DM_H3K27me3_cKO_DEseq2_up_1884|4.61|1.56|3.04	0	.
chr1	61628600	61631399	DM_H3K27me3_cKO_DEseq2_up_1885|5.08|3.07|2.01	0	.
chr19	34321400	34324999	DM_H3K27me3_cKO_DEseq2_up_1886|4.95|2.57|2.39	0	.
chr8	92147400	92161599	DM_H3K27me3_cKO_DEseq2_up_1887|7.42|6.55|0.87	0	.
chr18	3901000	3905599	DM_H3K27me3_cKO_DEseq2_up_1888|5.27|3.44|1.83	0	.
chr11	103757400	103760799	DM_H3K27me3_cKO_DEseq2_up_1889|4.85|2.45|2.41	0	.
chr7	69575200	69588199	DM_H3K27me3_cKO_DEseq2_up_1890|7.19|6.27|0.92	0	.
chr10	92004200	92012199	DM_H3K27me3_cKO_DEseq2_up_1891|6.07|4.71|1.37	0	.
chr2	166310200	166321599	DM_H3K27me3_cKO_DEseq2_up_1892|6.61|5.51|1.1	0	.
chr14	104635600	104652399	DM_H3K27me3_cKO_DEseq2_up_1893|7.58|6.75|0.84	0	.
chr11	65420200	65428799	DM_H3K27me3_cKO_DEseq2_up_1894|6.3|5.1|1.2	0	.
chr8	125242200	125246199	DM_H3K27me3_cKO_DEseq2_up_1895|5.31|3.44|1.86	0	.
chr6	29916200	29922999	DM_H3K27me3_cKO_DEseq2_up_1896|5.78|4.24|1.54	0	.
chr8	93189400	93195199	DM_H3K27me3_cKO_DEseq2_up_1897|5.57|3.89|1.69	0	.
chr12	73597200	73603599	DM_H3K27me3_cKO_DEseq2_up_1898|5.91|4.57|1.34	0	.
chr9	46549200	46558199	DM_H3K27me3_cKO_DEseq2_up_1899|6.26|5.01|1.24	0	.
chr1	133407600	133412399	DM_H3K27me3_cKO_DEseq2_up_1900|5.52|3.84|1.68	0	.
chr9	75773400	75782599	DM_H3K27me3_cKO_DEseq2_up_1901|6.91|5.84|1.07	0	.
chr11	38780200	38785799	DM_H3K27me3_cKO_DEseq2_up_1902|5.74|4.27|1.47	0	.
chr13	115694200	115699599	DM_H3K27me3_cKO_DEseq2_up_1903|5.68|4.19|1.48	0	.
chr7	98402000	98410199	DM_H3K27me3_cKO_DEseq2_up_1904|6.58|5.51|1.07	0	.
chr2	179467800	179479999	DM_H3K27me3_cKO_DEseq2_up_1905|7.07|6.16|0.91	0	.
chr12	112217400	112224999	DM_H3K27me3_cKO_DEseq2_up_1906|6.34|5.05|1.29	0	.
chr7	81266800	81272199	DM_H3K27me3_cKO_DEseq2_up_1907|5.32|3.57|1.75	0	.
chr1	184104800	184115199	DM_H3K27me3_cKO_DEseq2_up_1908|6.35|5.18|1.17	0	.
chr5	111529000	111537799	DM_H3K27me3_cKO_DEseq2_up_1909|6.28|5.05|1.23	0	.
chr7	135396400	135400399	DM_H3K27me3_cKO_DEseq2_up_1910|5.83|4.41|1.42	0	.
chr18	55270200	55275199	DM_H3K27me3_cKO_DEseq2_up_1911|5.47|3.84|1.63	0	.
chr3	34587000	34596399	DM_H3K27me3_cKO_DEseq2_up_1912|6.37|5.18|1.19	0	.
chr9	117735600	117740999	DM_H3K27me3_cKO_DEseq2_up_1913|5.37|3.63|1.74	0	.
chr6	89215000	89218199	DM_H3K27me3_cKO_DEseq2_up_1914|5.09|3.07|2.02	0	.
chr3	14890000	14892199	DM_H3K27me3_cKO_DEseq2_up_1915|4.74|2|2.74	0	.
chr1	189932800	189938199	DM_H3K27me3_cKO_DEseq2_up_1916|6.08|4.82|1.27	0	.
chr13	107906600	107915399	DM_H3K27me3_cKO_DEseq2_up_1917|6.56|5.46|1.09	0	.
chr7	107516400	107520599	DM_H3K27me3_cKO_DEseq2_up_1918|5.37|3.63|1.74	0	.
chr10	104802200	104804999	DM_H3K27me3_cKO_DEseq2_up_1919|4.49|1.3|3.19	0	.
chr3	40672800	40679599	DM_H3K27me3_cKO_DEseq2_up_1920|6.14|4.89|1.25	0	.
chr19	58178400	58184399	DM_H3K27me3_cKO_DEseq2_up_1921|6.08|4.79|1.29	0	.
chr2	79141200	79147799	DM_H3K27me3_cKO_DEseq2_up_1922|5.77|4.24|1.53	0	.
chr4	120583000	120589599	DM_H3K27me3_cKO_DEseq2_up_1923|5.9|4.57|1.33	0	.
chr19	12867400	12877399	DM_H3K27me3_cKO_DEseq2_up_1924|6.36|5.19|1.16	0	.
chr1	122859600	122864999	DM_H3K27me3_cKO_DEseq2_up_1925|5.38|3.68|1.69	0	.
chr16	73489800	73492199	DM_H3K27me3_cKO_DEseq2_up_1926|4.57|1.56|3.01	0	.
chr2	66068600	66071999	DM_H3K27me3_cKO_DEseq2_up_1927|4.74|1.97|2.76	0	.
chr5	98841000	98844199	DM_H3K27me3_cKO_DEseq2_up_1928|4.95|2.43|2.51	0	.
chr7	18572400	18575399	DM_H3K27me3_cKO_DEseq2_up_1929|4.8|2.31|2.49	0	.
chr2	17991800	17996199	DM_H3K27me3_cKO_DEseq2_up_1930|5.23|3.23|2.01	0	.
chr11	68266600	68276799	DM_H3K27me3_cKO_DEseq2_up_1931|6.74|5.62|1.12	0	.
chr10	96073000	96079799	DM_H3K27me3_cKO_DEseq2_up_1932|6.12|4.89|1.23	0	.
chr12	73711400	73715799	DM_H3K27me3_cKO_DEseq2_up_1933|5.16|3.23|1.93	0	.
chr1	137170600	137179799	DM_H3K27me3_cKO_DEseq2_up_1934|6.42|5.1|1.32	0	.
chr17	72699200	72707799	DM_H3K27me3_cKO_DEseq2_up_1935|6.09|4.82|1.28	0	.
chr6	16969200	16975999	DM_H3K27me3_cKO_DEseq2_up_1936|5.86|4.45|1.42	0	.
chr5	72789800	72793599	DM_H3K27me3_cKO_DEseq2_up_1937|5.1|3.08|2.03	0	.
chr9	116649200	116655599	DM_H3K27me3_cKO_DEseq2_up_1938|6.21|4.98|1.23	0	.
chr5	33688800	33707599	DM_H3K27me3_cKO_DEseq2_up_1939|8.06|7.29|0.77	0	.
chr3	83607600	83634199	DM_H3K27me3_cKO_DEseq2_up_1940|7.89|7.14|0.75	0	.
chr14	95279600	95284199	DM_H3K27me3_cKO_DEseq2_up_1941|5.16|3.08|2.07	0	.
chr2	35981200	35990599	DM_H3K27me3_cKO_DEseq2_up_1942|6.24|5.03|1.21	0	.
chr2	128549400	128553399	DM_H3K27me3_cKO_DEseq2_up_1943|5.5|3.89|1.6	0	.
chr16	44901000	44904399	DM_H3K27me3_cKO_DEseq2_up_1944|5.19|3.31|1.89	0	.
chr19	8618200	8620799	DM_H3K27me3_cKO_DEseq2_up_1945|4.54|1.57|2.97	0	.
chr18	76053600	76077399	DM_H3K27me3_cKO_DEseq2_up_1946|8.05|7.22|0.83	0	.
chr15	8570800	8587999	DM_H3K27me3_cKO_DEseq2_up_1947|7.65|6.8|0.85	0	.
chr13	72534200	72543999	DM_H3K27me3_cKO_DEseq2_up_1948|6.25|4.98|1.27	0	.
chr7	136645000	136655799	DM_H3K27me3_cKO_DEseq2_up_1949|6.41|5.29|1.12	0	.
chr17	52080000	52084199	DM_H3K27me3_cKO_DEseq2_up_1950|5.15|3.16|1.99	0	.
chr17	19465200	19469199	DM_H3K27me3_cKO_DEseq2_up_1951|4.94|2.68|2.25	0	.
chr19	47939600	47948799	DM_H3K27me3_cKO_DEseq2_up_1952|6.71|5.64|1.07	0	.
chr15	32067000	32073199	DM_H3K27me3_cKO_DEseq2_up_1953|5.81|4.41|1.4	0	.
chr3	132850400	132855999	DM_H3K27me3_cKO_DEseq2_up_1954|5.74|4.31|1.44	0	.
chr18	80040000	80044799	DM_H3K27me3_cKO_DEseq2_up_1955|5.51|3.84|1.67	0	.
chr9	65502800	65506599	DM_H3K27me3_cKO_DEseq2_up_1956|5.01|2.89|2.12	0	.
chr16	33874800	33880999	DM_H3K27me3_cKO_DEseq2_up_1957|6.18|4.96|1.22	0	.
chr5	45057800	45060399	DM_H3K27me3_cKO_DEseq2_up_1958|4.5|1.3|3.2	0	.
chr10	71432400	71434999	DM_H3K27me3_cKO_DEseq2_up_1959|4.62|1.79|2.83	0	.
chr4	33544000	33558799	DM_H3K27me3_cKO_DEseq2_up_1960|7.24|6.33|0.91	0	.
chr8	119429000	119433999	DM_H3K27me3_cKO_DEseq2_up_1961|5.17|3.15|2.02	0	.
chr1	166044000	166061799	DM_H3K27me3_cKO_DEseq2_up_1962|7.78|6.97|0.8	0	.
chr5	90754800	90762599	DM_H3K27me3_cKO_DEseq2_up_1963|6.46|5.33|1.14	0	.
chr14	75501200	75507399	DM_H3K27me3_cKO_DEseq2_up_1964|5.86|4.34|1.52	0	.
chr10	61023200	61034399	DM_H3K27me3_cKO_DEseq2_up_1965|6.79|5.77|1.02	0	.
chr12	54005000	54037599	DM_H3K27me3_cKO_DEseq2_up_1966|8.34|7.62|0.71	0	.
chr1	64377800	64381799	DM_H3K27me3_cKO_DEseq2_up_1967|5.12|2.98|2.15	0	.
chr17	48053800	48058799	DM_H3K27me3_cKO_DEseq2_up_1968|6.14|4.92|1.22	0	.
chr17	83524800	83530399	DM_H3K27me3_cKO_DEseq2_up_1969|5.62|4.03|1.59	0	.
chr10	122054400	122058199	DM_H3K27me3_cKO_DEseq2_up_1970|4.9|2.44|2.46	0	.
chr2	160446000	160448999	DM_H3K27me3_cKO_DEseq2_up_1971|5.31|3.57|1.74	0	.
chr12	103312200	103320199	DM_H3K27me3_cKO_DEseq2_up_1972|6.72|5.64|1.08	0	.
chr9	34862000	34882199	DM_H3K27me3_cKO_DEseq2_up_1973|7.61|6.77|0.84	0	.
chr2	153639600	153648399	DM_H3K27me3_cKO_DEseq2_up_1974|6.24|4.87|1.36	0	.
chr1	130223800	130229799	DM_H3K27me3_cKO_DEseq2_up_1975|5.72|4.23|1.49	0	.
chr11	69855400	69860399	DM_H3K27me3_cKO_DEseq2_up_1976|5.93|4.6|1.33	0	.
chr5	107142200	107152599	DM_H3K27me3_cKO_DEseq2_up_1977|6.73|5.67|1.05	0	.
chr6	70985200	70988999	DM_H3K27me3_cKO_DEseq2_up_1978|5.56|3.84|1.72	0	.
chr6	136625200	136629199	DM_H3K27me3_cKO_DEseq2_up_1979|5.29|3.44|1.85	0	.
chr9	19614800	19622599	DM_H3K27me3_cKO_DEseq2_up_1980|6.02|4.74|1.28	0	.
chr7	66399600	66407999	DM_H3K27me3_cKO_DEseq2_up_1981|6.63|5.59|1.04	0	.
chr2	115996200	115999599	DM_H3K27me3_cKO_DEseq2_up_1982|5.01|2.9|2.12	0	.
chr5	139610000	139614599	DM_H3K27me3_cKO_DEseq2_up_1983|5.54|3.99|1.56	0	.
chr5	120261400	120279199	DM_H3K27me3_cKO_DEseq2_up_1984|7.66|6.84|0.81	0	.
chr5	136859800	136865599	DM_H3K27me3_cKO_DEseq2_up_1985|6.57|5.45|1.12	0	.
chr3	30405400	30423199	DM_H3K27me3_cKO_DEseq2_up_1986|7.79|7.01|0.78	0	.
chr19	59643600	59648799	DM_H3K27me3_cKO_DEseq2_up_1987|5.93|4.6|1.33	0	.
chr9	15448200	15451999	DM_H3K27me3_cKO_DEseq2_up_1988|5.55|3.9|1.65	0	.
chr10	4710000	4719399	DM_H3K27me3_cKO_DEseq2_up_1989|6.65|5.54|1.11	0	.
chr5	127333000	127352799	DM_H3K27me3_cKO_DEseq2_up_1990|7.65|6.84|0.81	0	.
chr9	47164600	47168999	DM_H3K27me3_cKO_DEseq2_up_1991|5.45|3.8|1.66	0	.
chr5	140485000	140491399	DM_H3K27me3_cKO_DEseq2_up_1992|5.82|4.34|1.48	0	.
chr10	48508600	48511199	DM_H3K27me3_cKO_DEseq2_up_1993|4.48|1.32|3.16	0	.
chr4	142074600	142079399	DM_H3K27me3_cKO_DEseq2_up_1994|5.84|4.48|1.37	0	.
chr9	46460000	46476599	DM_H3K27me3_cKO_DEseq2_up_1995|7.38|6.51|0.88	0	.
chr11	95569200	95573399	DM_H3K27me3_cKO_DEseq2_up_1996|6.08|4.84|1.24	0	.
chr7	129508200	129523199	DM_H3K27me3_cKO_DEseq2_up_1997|7.22|6.34|0.88	0	.
chr9	61670600	61674399	DM_H3K27me3_cKO_DEseq2_up_1998|5.14|3.23|1.91	0	.
chr7	65737600	65742999	DM_H3K27me3_cKO_DEseq2_up_1999|5.52|3.89|1.62	0	.
chr19	38625800	38628999	DM_H3K27me3_cKO_DEseq2_up_2000|4.93|2.68|2.25	0	.
[truncated: 2,041 more rows]
