# Supplementary material for: Dnmt3a knockout in excitatory neurons impairs postnatal synapse maturation and increases the repressive histone modification H3K27me3
Source: eLife. 2022 May 23;11:e66909. doi: 10.7554/eLife.66909 (PMC9170249; doi:10.7554/eLife.66909)
Supplement: Supplementary file 8. [file elife-66909-supp8.xlsx]

## Sheet: Readme
Supplementary File 8. List of enriched Gene Ontology terms for biological process in genes associated with up-regulated H3K27me3 regions in P39 Dnmt3a cKO.
Gene associations of the up-regulated H3K27me3 regions were identified using GREAT (v 3.0.0).
Association rule: Basal+extension: 5000 bp upstream, 1000 bp downstream, 1000000 bp max extension, curated regulatory domains included.
10068 GO biological process terms were tested for enrichment with both binomial test and hypergeometric test . Terms with hypergeometric test FDR < 0.05 were consider significant.

## Sheet: enriched GO BP terms
ID	Description	BinomRank	BinomP	BinomBonfP	BinomFdrQ	RegionFoldEnrich	ExpRegions	ObsRegions	GenomeFrac	SetCov	HyperRank	HyperP	HyperBonfP	HyperFdrQ	GeneFoldEnrich	ExpGenes	ObsGenes	TotalGenes	GeneSetCov	TermCov
GO:0048731	system development	3	3.54847e-86	3.5726e-82	1.19087e-82	1.47297	1265.47	1864	0.313235	0.461386	1	2.1949e-59	2.20982e-55	2.20982e-55	1.61949	541.527	877	3113	0.230184	0.281722
GO:0007275	multicellular organismal development	1	1.42646e-90	1.43616e-86	1.43616e-86	1.44421	1409.08	2035	0.348781	0.503713	2	1.14393e-58	1.15171e-54	5.75853e-55	1.55523	637.203	991	3663	0.260105	0.270543
GO:0032502	developmental process	2	2.64972e-86	2.66774e-82	1.33387e-82	1.40834	1508.87	2125	0.373482	0.52599	3	3.47238e-55	3.49599e-51	1.16533e-51	1.49956	712.875	1069	4098	0.280577	0.260859
GO:0048856	anatomical structure development	4	2.98144e-79	3.00171e-75	7.50428e-76	1.42069	1383.83	1966	0.342533	0.486634	4	1.49343e-52	1.50359e-48	3.75897e-49	1.52619	631.637	964	3631	0.253018	0.265492
GO:0009653	anatomical structure morphogenesis	22	2.96148e-61	2.98162e-57	1.35528e-58	1.55035	804.334	1247	0.199093	0.308663	5	1.64322e-51	1.6544e-47	3.3088e-48	1.81377	302.685	549	1740	0.144094	0.315517
GO:0044767	single-organism developmental process	8	7.15237e-67	7.20101e-63	9.00126e-64	1.4185	1247.8	1770	0.308861	0.438119	6	3.81064e-49	3.83655e-45	6.39425e-46	1.54734	560.315	867	3221	0.227559	0.269171
GO:0048513	organ development	6	2.88778e-70	2.90742e-66	4.8457e-67	1.52496	956.094	1458	0.236657	0.360891	7	1.2922e-48	1.30099e-44	1.85856e-45	1.6625	406.015	675	2334	0.177165	0.289203
GO:0007399	nervous system development	65	7.0785e-46	7.12663e-42	1.09641e-43	1.48535	767.494	1140	0.189974	0.282178	8	4.10729e-47	4.13522e-43	5.16902e-44	1.84352	261.457	482	1503	0.126509	0.320692
GO:0009888	tissue development	29	1.31863e-54	1.32759e-50	4.5779e-52	1.62937	597.779	974	0.147965	0.241089	9	2.11957e-44	2.13398e-40	2.37109e-41	1.86796	235.016	439	1351	0.115223	0.324945
GO:0030154	cell differentiation	7	2.73495e-67	2.75355e-63	3.93364e-64	1.47814	1052.68	1556	0.260563	0.385149	10	3.94605e-44	3.97289e-40	3.97289e-41	1.6036	434.022	696	2495	0.182677	0.278958
GO:0050793	regulation of developmental process	32	7.6002e-54	7.65188e-50	2.39121e-51	1.56979	687.991	1080	0.170295	0.267327	11	7.40285e-43	7.45319e-39	6.77562e-40	1.78827	268.415	480	1543	0.125984	0.311082
GO:0048522	positive regulation of cellular process	20	7.77437e-62	7.82723e-58	3.91362e-59	1.44575	1088.71	1574	0.269482	0.389604	12	9.24942e-43	9.31231e-39	7.76026e-40	1.54181	503.953	777	2897	0.203937	0.268209
GO:0048518	positive regulation of biological process	21	1.28952e-61	1.29829e-57	6.18233e-59	1.41632	1188.29	1683	0.294131	0.416584	13	1.00807e-41	1.01492e-37	7.80711e-39	1.49603	568.838	851	3270	0.22336	0.260245
GO:0048869	cellular developmental process	11	3.81572e-65	3.84167e-61	3.49243e-62	1.45993	1083.61	1582	0.268221	0.391584	14	3.30953e-41	3.33204e-37	2.38003e-38	1.56263	458.202	716	2634	0.187926	0.27183
GO:2000026	regulation of multicellular organismal development	80	7.09146e-43	7.13968e-39	8.9246e-41	1.56369	576.201	901	0.142624	0.22302	15	1.69059e-40	1.70208e-36	1.13472e-37	1.88414	208.052	392	1196	0.102887	0.327759
GO:0051239	regulation of multicellular organismal process	53	1.83572e-47	1.8482e-43	3.48717e-45	1.47307	819.377	1207	0.202816	0.298762	16	3.85084e-40	3.87702e-36	2.42314e-37	1.67078	332.779	556	1913	0.145932	0.290643
GO:0022008	neurogenesis	108	1.25903e-32	1.2676e-28	1.1737e-30	1.48066	582.847	863	0.144269	0.213614	17	2.32748e-38	2.3433e-34	1.37841e-35	1.91619	185.264	355	1065	0.0931759	0.333333
GO:0048699	generation of neurons	110	2.15487e-32	2.16952e-28	1.97229e-30	1.49229	557.532	832	0.138003	0.205941	18	2.86747e-37	2.88697e-33	1.60387e-34	1.93739	172.913	335	994	0.0879265	0.337022
GO:0010628	positive regulation of gene expression	35	3.06759e-53	3.08845e-49	8.82414e-51	1.71913	474.077	815	0.117346	0.201733	19	3.01914e-35	3.03967e-31	1.59982e-32	1.85859	191.005	355	1098	0.0931759	0.323315
GO:0045595	regulation of cell differentiation	62	2.18819e-46	2.20307e-42	3.55333e-44	1.62095	529.937	859	0.131173	0.212624	20	1.06998e-33	1.07726e-29	5.38629e-31	1.84059	189.613	349	1090	0.0916011	0.320184
GO:0009887	organ morphogenesis	66	7.32089e-46	7.37067e-42	1.11677e-43	1.75292	384.501	674	0.0951735	0.166832	21	3.29686e-33	3.31928e-29	1.58061e-30	2.02532	131.337	266	755	0.0698163	0.352318
GO:0009893	positive regulation of metabolic process	52	2.60814e-48	2.62587e-44	5.04976e-46	1.51902	724.153	1100	0.179246	0.272277	22	4.18793e-32	4.21641e-28	1.91655e-29	1.60267	323.212	518	1858	0.135958	0.278794
GO:0048729	tissue morphogenesis	88	2.01823e-38	2.03195e-34	2.30903e-36	1.87056	255.539	478	0.0632522	0.118317	23	1.28718e-31	1.29594e-27	5.63451e-29	2.26671	85.5867	194	492	0.0509186	0.394309
GO:0010604	positive regulation of macromolecule metabolic process	51	2.39693e-48	2.41323e-44	4.73183e-46	1.54302	676.594	1044	0.167474	0.258416	24	1.84271e-31	1.85524e-27	7.73019e-29	1.62379	298.684	485	1717	0.127297	0.282469
GO:0030182	neuron differentiation	129	2.84924e-27	2.86861e-23	2.22373e-25	1.5318	419.769	643	0.103903	0.159158	25	4.25985e-31	4.28881e-27	1.71553e-28	2.02794	122.292	248	703	0.0650919	0.352774
GO:0048468	cell development	104	1.35662e-33	1.36584e-29	1.31331e-31	1.49247	575.556	859	0.142464	0.212624	26	8.92578e-31	8.98647e-27	3.45634e-28	1.76354	205.269	362	1180	0.0950131	0.30678
GO:0045893	positive regulation of transcription, DNA-dependent	41	2.95548e-50	2.97558e-46	7.25751e-48	1.73107	438.457	759	0.108529	0.187871	27	1.13522e-30	1.14294e-26	4.23311e-28	1.83587	174.305	320	1002	0.0839895	0.319361
GO:0051094	positive regulation of developmental process	87	9.62332e-39	9.68875e-35	1.11365e-36	1.70996	361.997	619	0.0896033	0.153218	28	2.4498e-30	2.46646e-26	8.80879e-28	2.00475	124.205	249	714	0.0653543	0.348739
GO:0045597	positive regulation of cell differentiation	81	3.49344e-42	3.51719e-38	4.34221e-40	1.8875	270.728	511	0.067012	0.126485	29	3.37274e-30	3.39567e-26	1.17092e-27	2.20925	88.7179	196	510	0.0514436	0.384314
GO:0060429	epithelium development	107	7.37243e-33	7.42256e-29	6.93697e-31	1.62996	377.922	616	0.0935451	0.152475	30	8.99355e-30	9.0547e-26	3.01823e-27	1.93796	137.774	267	792	0.0700787	0.337121
GO:0051254	positive regulation of RNA metabolic process	44	2.85601e-49	2.87543e-45	6.53507e-47	1.7131	448.311	768	0.110968	0.190099	32	1.19493e-29	1.20305e-25	3.75953e-27	1.8051	180.045	325	1035	0.0853018	0.31401
GO:0035295	tube development	94	1.16012e-36	1.16801e-32	1.24256e-34	1.83734	260.703	479	0.0645305	0.118564	31	1.16206e-29	1.16996e-25	3.77407e-27	2.26458	80.368	182	462	0.047769	0.393939
GO:0048519	negative regulation of biological process	90	5.40059e-38	5.43731e-34	6.04146e-36	1.34469	1082.04	1455	0.267831	0.360148	33	3.07679e-29	3.09771e-25	9.387e-27	1.43184	518.913	743	2983	0.195013	0.249078
GO:0045935	positive regulation of nucleobase-containing compound metabolic process	60	1.22051e-46	1.22881e-42	2.04802e-44	1.65466	489.526	810	0.12117	0.200495	34	4.98212e-29	5.01599e-25	1.47529e-26	1.74956	200.05	350	1150	0.0918635	0.304348
GO:0006357	regulation of transcription from RNA polymerase II promoter	37	5.24954e-51	5.28524e-47	1.42844e-48	1.66802	513.184	856	0.127026	0.211881	35	5.1346e-29	5.16951e-25	1.477e-26	1.72037	214.489	369	1233	0.0968504	0.29927
GO:0007417	central nervous system development	120	5.04928e-29	5.08362e-25	4.23635e-27	1.60799	356.346	573	0.0882045	0.141832	36	6.89111e-29	6.93798e-25	1.92722e-26	2.02786	113.42	230	652	0.0603675	0.352761
GO:0031325	positive regulation of cellular metabolic process	63	3.42399e-46	3.44727e-42	5.47186e-44	1.52825	679.21	1038	0.168121	0.256931	37	9.72447e-29	9.79059e-25	2.64611e-26	1.5882	302.859	481	1741	0.126247	0.276278
GO:0051173	positive regulation of nitrogen compound metabolic process	67	9.55178e-46	9.61673e-42	1.43533e-43	1.64272	495.52	814	0.122653	0.201485	38	1.14209e-28	1.14985e-24	3.02593e-26	1.73634	203.877	354	1172	0.0929134	0.302048
GO:0002009	morphogenesis of an epithelium	113	5.83138e-32	5.87103e-28	5.1956e-30	1.87777	210.356	395	0.0520683	0.0977723	39	3.41589e-28	3.43912e-24	8.81826e-26	2.35915	66.9733	158	385	0.0414698	0.41039
GO:0009790	embryo development	45	5.60726e-49	5.64539e-45	1.25453e-46	1.72985	429.518	743	0.106316	0.183911	40	4.22319e-28	4.2519e-24	1.06298e-25	1.80485	170.651	308	981	0.0808399	0.313965
GO:0060284	regulation of cell development	116	8.82646e-31	8.88648e-27	7.66076e-29	1.67695	314.857	528	0.0779349	0.130693	41	5.20529e-28	5.24069e-24	1.27822e-25	2.1275	93.0668	198	535	0.0519685	0.370094
GO:0010557	positive regulation of macromolecule biosynthetic process	43	2.73978e-49	2.75841e-45	6.41492e-47	1.6857	477.546	805	0.118204	0.199257	42	6.5807e-28	6.62544e-24	1.57749e-25	1.73409	199.528	346	1147	0.0908136	0.301656
GO:0048523	negative regulation of cellular process	75	3.18589e-44	3.20755e-40	4.27674e-42	1.39751	995.342	1391	0.246372	0.344307	43	1.19838e-27	1.20653e-23	2.80589e-25	1.4435	471.771	681	2712	0.17874	0.251106
GO:0009891	positive regulation of biosynthetic process	54	2.65957e-47	2.67766e-43	4.95863e-45	1.64371	509.215	837	0.126043	0.207178	44	1.80383e-27	1.8161e-23	4.1275e-25	1.69455	216.576	367	1245	0.0963255	0.294779
GO:0031328	positive regulation of cellular biosynthetic process	61	1.8428e-46	1.85533e-42	3.04153e-44	1.64357	501.348	824	0.124096	0.20396	45	2.15999e-27	2.17468e-23	4.83263e-25	1.70015	212.923	362	1224	0.0950131	0.295752
GO:0042127	regulation of cell proliferation	111	2.60088e-32	2.61857e-28	2.35907e-30	1.56415	446.248	698	0.110458	0.172772	46	1.44562e-26	1.45545e-22	3.16403e-24	1.75147	182.133	319	1047	0.083727	0.30468
GO:0048598	embryonic morphogenesis	68	1.65317e-45	1.66441e-41	2.44766e-43	1.94026	264.398	513	0.065445	0.12698	47	2.56256e-26	2.57999e-22	5.48934e-24	2.09334	92.1971	193	530	0.0506562	0.364151
GO:0000904	cell morphogenesis involved in differentiation	178	1.27013e-18	1.27877e-14	7.18407e-17	1.57253	254.367	400	0.0629621	0.0990099	48	4.31301e-26	4.34234e-22	9.04655e-24	2.25988	70.8004	160	407	0.0419947	0.39312
GO:0045944	positive regulation of transcription from RNA polymerase II promoter	89	2.54846e-38	2.56579e-34	2.88291e-36	1.73491	338.347	587	0.0837492	0.145297	49	5.82106e-26	5.86064e-22	1.19605e-23	1.9083	126.814	242	729	0.0635171	0.331962
GO:0007423	sensory organ development	64	3.93466e-46	3.96142e-42	6.18972e-44	1.96185	257.92	506	0.0638417	0.125248	50	1.01124e-25	1.01811e-21	2.03623e-23	2.13348	84.369	180	485	0.0472441	0.371134
GO:0072358	cardiovascular system development	173	5.63893e-19	5.67727e-15	3.28166e-17	1.47357	358.993	529	0.0888595	0.130941	51	1.20376e-25	1.21194e-21	2.37636e-23	1.9082	125.249	239	720	0.0627297	0.331944
GO:0007420	brain development	146	3.7833e-23	3.80902e-19	2.60892e-21	1.61146	282.973	456	0.0700427	0.112871	52	1.77925e-25	1.79134e-21	3.44489e-23	2.0914	89.4137	187	514	0.0490814	0.363813
GO:0045165	cell fate commitment	101	3.0043e-34	3.02473e-30	2.99478e-32	2.20794	130.891	289	0.0323988	0.0715347	53	2.30626e-25	2.32194e-21	4.38102e-23	2.74363	38.2705	105	220	0.0275591	0.477273
GO:0048646	anatomical structure formation involved in morphogenesis	86	5.60274e-39	5.64084e-35	6.55911e-37	1.72172	354.297	610	0.0876973	0.15099	54	4.87567e-25	4.90883e-21	9.09042e-23	1.86158	134.295	250	772	0.0656168	0.323834
GO:0030900	forebrain development	132	1.4522e-26	1.46207e-22	1.10763e-24	1.86524	179.065	334	0.0443231	0.0826733	55	9.3772e-25	9.44097e-21	1.71654e-22	2.44457	52.361	128	301	0.0335958	0.425249
GO:0035239	tube morphogenesis	109	2.11682e-32	2.13122e-28	1.95525e-30	1.95957	183.203	359	0.0453473	0.0888614	56	1.30822e-24	1.31711e-20	2.35199e-22	2.4013	54.9703	132	316	0.0346457	0.417722
GO:0007389	pattern specification process	112	4.68292e-32	4.71477e-28	4.20961e-30	1.87807	210.855	396	0.0521917	0.0980198	57	5.77593e-24	5.8152e-20	1.02021e-21	2.16749	74.2795	161	427	0.0422572	0.377049
GO:0007411	axon guidance	283	1.555e-12	1.56558e-08	5.53208e-11	1.65891	130.206	216	0.0322293	0.0534654	58	2.36466e-23	2.38074e-19	4.10472e-21	3.00243	27.3112	82	157	0.0215223	0.522293
GO:0050767	regulation of neurogenesis	172	1.45095e-19	1.46082e-15	8.49311e-18	1.5742	266.168	419	0.065883	0.103713	59	2.84957e-23	2.86895e-19	4.86263e-21	2.15064	73.9316	159	425	0.0417323	0.374118
GO:0051960	regulation of nervous system development	160	1.0655e-20	1.07274e-16	6.70463e-19	1.5635	291.014	455	0.0720332	0.112624	60	8.50877e-23	8.56663e-19	1.42777e-20	2.05901	84.0211	173	483	0.0454068	0.358178
GO:0040011	locomotion	217	5.69289e-16	5.7316e-12	2.64129e-14	1.42357	365.28	520	0.0904157	0.128713	61	1.26791e-22	1.27654e-18	2.09268e-20	1.81612	133.251	242	766	0.0635171	0.315927
GO:0001501	skeletal system development	99	1.71401e-34	1.72567e-30	1.7431e-32	1.94748	199.232	388	0.0493148	0.0960396	62	1.62161e-22	1.63264e-18	2.63328e-20	2.22424	63.8421	142	367	0.0372703	0.386921
GO:0001655	urogenital system development	166	4.20759e-20	4.23621e-16	2.55193e-18	1.72522	182.586	315	0.0451945	0.0779703	63	1.88562e-22	1.89844e-18	3.0134e-20	2.40873	49.4037	119	284	0.0312336	0.419014
GO:0060562	epithelial tube morphogenesis	118	2.69319e-30	2.7115e-26	2.29788e-28	1.95397	172.981	338	0.0428171	0.0836634	64	2.04004e-22	2.05391e-18	3.20924e-20	2.36033	52.5349	124	302	0.0325459	0.410596
GO:0022603	regulation of anatomical structure morphogenesis	180	1.58943e-18	1.60023e-14	8.89019e-17	1.53644	283.123	435	0.0700799	0.107673	65	3.61748e-22	3.64208e-18	5.6032e-20	1.91619	105.94	203	609	0.0532808	0.333333
GO:0048568	embryonic organ development	97	7.33447e-36	7.38434e-32	7.61273e-34	1.9383	210.493	408	0.0521023	0.10099	66	8.30278e-22	8.35923e-18	1.26655e-19	2.11789	72.7139	154	418	0.04042	0.368421
GO:0000902	cell morphogenesis	189	4.87873e-18	4.9119e-14	2.59889e-16	1.48543	327.178	486	0.0809848	0.120297	67	1.6273e-21	1.63836e-17	2.44532e-19	1.89146	107.853	204	620	0.0535433	0.329032
GO:0023051	regulation of signaling	184	2.5988e-18	2.61647e-14	1.42199e-16	1.2861	787.654	1013	0.194964	0.250743	68	2.30756e-21	2.32325e-17	3.41655e-19	1.45256	356.611	518	2050	0.135958	0.252683
GO:0006928	cellular component movement	230	3.31041e-15	3.33292e-11	1.44909e-13	1.39053	399.127	555	0.0987938	0.137376	69	2.35376e-21	2.36976e-17	3.43444e-19	1.74486	147.863	258	850	0.0677165	0.303529
GO:0010646	regulation of cell communication	188	4.03635e-18	4.06379e-14	2.16159e-16	1.28431	787.972	1012	0.195043	0.250495	70	2.57789e-21	2.59542e-17	3.70774e-19	1.45185	356.785	518	2051	0.135958	0.25256
GO:0072001	renal system development	142	2.21808e-23	2.23316e-19	1.57265e-21	1.84952	162.204	300	0.0401496	0.0742574	71	3.57912e-21	3.60346e-17	5.07529e-19	2.46038	43.4892	107	250	0.028084	0.428
GO:0045664	regulation of neuron differentiation	176	7.83922e-19	7.89252e-15	4.48439e-17	1.6201	224.061	363	0.0554606	0.0898515	72	4.03622e-21	4.06366e-17	5.64398e-19	2.24418	57.9276	130	333	0.0341207	0.39039
GO:0001763	morphogenesis of a branching structure	136	4.57398e-25	4.60509e-21	3.38609e-23	2.11301	109.323	231	0.0270601	0.0571782	73	7.98201e-21	8.03629e-17	1.10086e-18	2.67865	33.2257	89	191	0.0233596	0.465969
GO:0048732	gland development	159	5.86532e-21	5.9052e-17	3.71396e-19	1.84173	147.144	271	0.0364219	0.0670792	74	1.51926e-20	1.52959e-16	2.06702e-18	2.40074	45.4027	109	261	0.0286089	0.417625
GO:0045892	negative regulation of transcription, DNA-dependent	57	3.14942e-47	3.17083e-43	5.56287e-45	1.81694	345.637	628	0.0855536	0.155445	75	2.32048e-20	2.33626e-16	3.11502e-18	1.74371	141.079	246	811	0.0645669	0.303329
GO:0032989	cellular component morphogenesis	190	8.12113e-18	8.17636e-14	4.30335e-16	1.46401	349.043	511	0.0863967	0.126485	76	2.51167e-20	2.52875e-16	3.3273e-18	1.80881	121.074	219	696	0.0574803	0.314655
GO:0048514	blood vessel morphogenesis	210	3.48638e-16	3.51009e-12	1.67147e-14	1.62875	186.647	304	0.0461997	0.0752475	77	2.65363e-20	2.67168e-16	3.46971e-18	2.16775	62.2765	135	358	0.0354331	0.377095
GO:0001568	blood vessel development	201	1.20637e-16	1.21458e-12	6.04267e-15	1.5822	219.947	348	0.0544424	0.0861386	78	3.30674e-20	3.32923e-16	4.26824e-18	2.05498	74.4535	153	428	0.0401575	0.357477
GO:0048812	neuron projection morphogenesis	363	2.92886e-10	2.94878e-06	8.12336e-09	1.44724	207.29	300	0.0513095	0.0742574	79	4.65847e-20	4.69015e-16	5.9369e-18	2.26917	52.8828	120	304	0.0314961	0.394737
GO:0001944	vasculature development	205	1.68606e-16	1.69753e-12	8.28062e-15	1.56093	232.553	363	0.0575627	0.0898515	80	4.7906e-20	4.82318e-16	6.02897e-18	2.01262	79.4982	160	457	0.0419947	0.350109
GO:0051253	negative regulation of RNA metabolic process	58	8.8738e-47	8.93414e-43	1.54037e-44	1.80128	353.637	637	0.087534	0.157673	81	5.19991e-20	5.23527e-16	6.4633e-18	1.71913	147.167	253	846	0.0664042	0.299054
GO:0009966	regulation of signal transduction	158	5.77528e-21	5.81455e-17	3.6801e-19	1.33317	701.334	935	0.173597	0.231436	82	6.36468e-20	6.40796e-16	7.81458e-18	1.46378	319.037	467	1834	0.122572	0.254635
GO:0010629	negative regulation of gene expression	70	4.3086e-45	4.3379e-41	6.19699e-43	1.76008	372.71	656	0.0922549	0.162376	83	1.4114e-19	1.421e-15	1.71204e-17	1.6822	158.127	266	909	0.0698163	0.292629
GO:0048666	neuron development	307	1.25499e-11	1.26353e-07	4.11572e-10	1.37712	320.96	442	0.0794456	0.109406	84	1.72982e-19	1.74158e-15	2.07331e-17	1.90908	93.7627	179	539	0.0469816	0.332097
GO:0009792	embryo development ending in birth or egg hatching	124	4.68344e-28	4.71529e-24	3.80265e-26	1.69544	274.854	466	0.0680333	0.115347	85	2.24491e-19	2.26017e-15	2.65902e-17	1.83622	108.375	199	623	0.052231	0.319422
GO:0007409	axonogenesis	426	7.11521e-09	7.16359e-05	1.6816e-07	1.43479	184.696	265	0.0457169	0.0655941	86	2.67586e-19	2.69406e-15	3.13263e-17	2.36705	44.359	105	255	0.0275591	0.411765
GO:0043009	chordate embryonic development	126	1.00706e-27	1.01391e-23	8.04692e-26	1.69377	272.765	462	0.067516	0.114356	87	2.95345e-19	2.97353e-15	3.41785e-17	1.83842	107.157	197	616	0.051706	0.319805
GO:0061564	axon development	476	4.08048e-08	0.000410822	8.63072e-07	1.40138	191.954	269	0.0475134	0.0665842	88	4.05597e-19	4.08355e-15	4.64039e-17	2.32526	46.4464	108	267	0.0283465	0.404494
GO:0051171	regulation of nitrogen compound metabolic process	34	3.04366e-53	3.06436e-49	9.01282e-51	1.39144	1163.54	1619	0.288005	0.400743	89	4.76526e-19	4.79767e-15	5.39064e-17	1.30495	618.416	807	3555	0.211811	0.227004
GO:0019219	regulation of nucleobase-containing compound metabolic process	31	2.84023e-54	2.85954e-50	9.22434e-52	1.39848	1151.96	1611	0.28514	0.398762	90	7.81815e-19	7.87131e-15	8.7459e-17	1.30486	612.328	799	3520	0.209711	0.226989
GO:0007167	enzyme linked receptor protein signaling pathway	394	1.11986e-09	1.12748e-05	2.86162e-08	1.43453	204.248	293	0.0505564	0.0725247	91	1.16643e-18	1.17436e-14	1.29051e-16	2.05202	68.7129	141	395	0.0370079	0.356962
GO:0061138	morphogenesis of a branching epithelium	139	4.47519e-24	4.50562e-20	3.24146e-22	2.13228	101.769	217	0.0251903	0.0537129	92	1.31008e-18	1.31899e-14	1.43368e-16	2.60727	31.8341	83	183	0.0217848	0.453552
GO:0048863	stem cell differentiation	102	3.13826e-34	3.1596e-30	3.09764e-32	2.17576	136.964	298	0.0339019	0.0737624	93	1.34936e-18	1.35854e-14	1.46079e-16	2.35483	43.3152	102	249	0.0267717	0.409639
GO:0031323	regulation of cellular metabolic process	36	2.92521e-52	2.9451e-48	8.18084e-50	1.33983	1374.81	1842	0.340298	0.455941	94	2.34229e-18	2.35822e-14	2.50875e-16	1.25998	769.063	969	4421	0.254331	0.219181
GO:0048667	cell morphogenesis involved in neuron differentiation	411	3.12751e-09	3.14877e-05	7.66125e-08	1.4259	200.575	286	0.0496474	0.0707921	95	2.49639e-18	2.51336e-14	2.64565e-16	2.23226	50.6214	113	291	0.0296588	0.388316
GO:0008284	positive regulation of cell proliferation	186	3.26844e-18	3.29066e-14	1.76917e-16	1.55203	264.815	411	0.0655482	0.101733	96	2.58722e-18	2.60481e-14	2.71334e-16	1.83757	101.765	187	585	0.0490814	0.319658
GO:0044707	single-multicellular organism process	5	1.09504e-70	1.10248e-66	2.20497e-67	1.32804	1713.06	2275	0.424024	0.563119	97	2.78467e-18	2.80361e-14	2.89032e-16	1.21918	987.552	1204	5677	0.316011	0.212084
GO:0048583	regulation of response to stimulus	170	9.0595e-20	9.1211e-16	5.36535e-18	1.2878	833.98	1074	0.206431	0.265842	98	3.09785e-18	3.11891e-14	3.18257e-16	1.38502	402.884	558	2316	0.146457	0.240933
GO:0045934	negative regulation of nucleobase-containing compound metabolic process	72	1.50274e-44	1.51296e-40	2.10133e-42	1.75117	375.749	658	0.0930072	0.162871	99	3.25236e-18	3.27447e-14	3.30755e-16	1.65326	158.475	262	911	0.0687664	0.287596
GO:0043583	ear development	138	4.27644e-24	4.30552e-20	3.11994e-22	1.98237	130.147	258	0.0322147	0.0638614	100	4.33622e-18	4.36571e-14	4.36571e-16	2.49199	35.3132	88	203	0.0230971	0.433497
GO:0051172	negative regulation of nitrogen compound metabolic process	69	3.64776e-45	3.67256e-41	5.32256e-43	1.75342	378.689	664	0.093735	0.164356	101	5.2249e-18	5.26043e-14	5.20835e-16	1.64422	160.562	264	923	0.0692913	0.286024
GO:0021537	telencephalon development	200	8.49336e-17	8.55111e-13	4.27556e-15	1.83083	119.072	218	0.0294732	0.0539604	102	6.08815e-18	6.12955e-14	6.00936e-16	2.58685	31.3122	81	180	0.0212598	0.45
GO:0031327	negative regulation of cellular biosynthetic process	71	6.39348e-45	6.43696e-41	9.06614e-43	1.73657	391	679	0.0967823	0.168069	103	6.21179e-18	6.25403e-14	6.07188e-16	1.62549	168.564	274	969	0.071916	0.282766
GO:0006351	transcription, DNA-dependent	18	2.15997e-62	2.17466e-58	1.20814e-59	1.64277	647.685	1064	0.160318	0.263366	105	6.97593e-18	7.02336e-14	6.68892e-16	1.43326	322.342	462	1853	0.12126	0.249325
GO:2000113	negative regulation of cellular macromolecule biosynthetic process	76	4.54134e-44	4.57222e-40	6.01608e-42	1.7554	368.577	647	0.091232	0.160148	104	6.95943e-18	7.00675e-14	6.73726e-16	1.64788	157.779	260	907	0.0682415	0.286659
GO:0032774	RNA biosynthetic process	19	5.29151e-62	5.3275e-58	2.80394e-59	1.63875	650.495	1066	0.161014	0.263861	106	7.9858e-18	8.0401e-14	7.585e-16	1.43097	324.255	464	1864	0.121785	0.248927
GO:0016477	cell migration	319	2.60276e-11	2.62046e-07	8.21461e-10	1.43008	247.539	354	0.0612721	0.0876238	107	8.81029e-18	8.8702e-14	8.28991e-16	1.88978	88.37	167	508	0.043832	0.32874
GO:0009890	negative regulation of biosynthetic process	74	2.65123e-44	2.66926e-40	3.60711e-42	1.72621	395.086	682	0.0977936	0.168812	108	8.95395e-18	9.01483e-14	8.34707e-16	1.6166	171.347	277	985	0.0727034	0.281218
GO:0007507	heart development	242	2.45928e-14	2.47601e-10	1.02314e-12	1.5331	219.164	336	0.0542486	0.0831683	111	1.42768e-17	1.43739e-13	1.29494e-15	1.99042	71.8441	143	413	0.0375328	0.346247
GO:0080090	regulation of primary metabolic process	30	1.48665e-54	1.49675e-50	4.98918e-52	1.35033	1361.89	1839	0.337102	0.455198	110	1.42058e-17	1.43024e-13	1.30021e-15	1.25463	764.366	959	4394	0.251706	0.218252
GO:0051093	negative regulation of developmental process	123	2.80857e-28	2.82766e-24	2.29891e-26	1.70553	270.297	461	0.0669051	0.114109	109	1.41618e-17	1.4258e-13	1.30808e-15	1.82054	101.069	184	581	0.048294	0.316695
GO:0010468	regulation of gene expression	12	4.65952e-65	4.6912e-61	3.90933e-62	1.45781	1089.31	1588	0.269631	0.393069	112	1.50174e-17	1.51195e-13	1.34995e-15	1.29736	597.367	775	3434	0.203412	0.225684
GO:0048562	embryonic organ morphogenesis	103	3.97977e-34	4.00683e-30	3.89013e-32	2.11825	148.708	315	0.0368089	0.0779703	113	2.27202e-17	2.28747e-13	2.02431e-15	2.22861	48.0121	107	276	0.028084	0.387681
GO:0000122	negative regulation of transcription from RNA polymerase II promoter	130	7.05567e-27	7.10365e-23	5.46434e-25	1.72809	243.621	421	0.0603023	0.104208	114	2.5885e-17	2.6061e-13	2.28605e-15	1.84851	93.5887	173	538	0.0454068	0.321561
GO:0051252	regulation of RNA metabolic process	17	3.24363e-63	3.26568e-59	1.92099e-60	1.48395	989.249	1468	0.244864	0.363366	116	3.26119e-17	3.28337e-13	2.83049e-15	1.31726	527.611	695	3033	0.182415	0.229146
GO:0023056	positive regulation of signaling	151	1.67385e-22	1.68523e-18	1.11605e-20	1.52343	358.402	546	0.0887135	0.135149	115	3.24102e-17	3.26306e-13	2.83745e-15	1.65296	149.429	247	859	0.0648294	0.287544
GO:0060173	limb development	225	1.30474e-15	1.31361e-11	5.83826e-14	1.85852	103.846	193	0.0257045	0.0477723	117	3.83289e-17	3.85896e-13	3.29825e-15	2.64219	28.007	74	161	0.0194226	0.459627
GO:0006355	regulation of transcription, DNA-dependent	9	3.31907e-65	3.34164e-61	3.71293e-62	1.50078	965.499	1449	0.238985	0.358663	118	4.01113e-17	4.0384e-13	3.42237e-15	1.32106	514.738	680	2959	0.178478	0.229807
GO:0048754	branching morphogenesis of an epithelial tube	145	3.64635e-23	3.67115e-19	2.53182e-21	2.17219	92.0729	200	0.0227903	0.0495049	119	4.38222e-17	4.41202e-13	3.70758e-15	2.65598	27.4852	73	158	0.0191601	0.462025
GO:2001141	regulation of RNA biosynthetic process	10	3.68856e-65	3.71365e-61	3.71365e-62	1.50053	965.659	1449	0.239025	0.358663	120	5.1185e-17	5.15331e-13	4.29442e-15	1.31972	515.26	680	2962	0.178478	0.229575
GO:0035108	limb morphogenesis	219	7.74784e-16	7.80052e-12	3.56188e-14	1.90185	96.7479	184	0.0239475	0.0455446	121	6.39767e-17	6.44118e-13	5.32329e-15	2.70066	25.9196	70	149	0.0183727	0.469799
GO:0010558	negative regulation of macromolecule biosynthetic process	82	4.15856e-42	4.18684e-38	5.1059e-40	1.72591	377.193	651	0.0933646	0.161139	122	6.62639e-17	6.67145e-13	5.4684e-15	1.61449	163.519	264	940	0.0692913	0.280851
GO:0031324	negative regulation of cellular metabolic process	78	1.47744e-43	1.48749e-39	1.90703e-41	1.63471	483.878	791	0.119772	0.195792	123	7.40487e-17	7.45522e-13	6.06116e-15	1.51704	222.143	337	1277	0.0884514	0.2639
GO:0009967	positive regulation of signal transduction	140	1.0073e-23	1.01415e-19	7.24395e-22	1.55779	338.942	528	0.0838967	0.130693	124	8.88016e-17	8.94055e-13	7.21012e-15	1.65945	142.819	237	821	0.0622047	0.288672
GO:0061061	muscle structure development	233	5.93687e-15	5.97724e-11	2.56534e-13	1.59857	187.043	299	0.0462977	0.0740099	126	1.17077e-16	1.17874e-12	9.35504e-15	2.00146	66.4515	133	382	0.0349081	0.348168
GO:0034654	nucleobase-containing compound biosynthetic process	24	3.29341e-57	3.3158e-53	1.38159e-54	1.57753	708.702	1118	0.175421	0.276733	125	1.16878e-16	1.17673e-12	9.41385e-15	1.38882	362.178	503	2082	0.132021	0.241595
GO:0009889	regulation of biosynthetic process	15	4.07537e-64	4.10308e-60	2.73539e-61	1.45711	1080.22	1574	0.267381	0.389604	127	1.52198e-16	1.53233e-12	1.20656e-14	1.2883	594.584	766	3418	0.20105	0.224108
GO:0031326	regulation of cellular biosynthetic process	16	1.51119e-63	1.52147e-59	9.50917e-61	1.45711	1073.36	1564	0.265684	0.387129	128	1.64573e-16	1.65692e-12	1.29447e-14	1.28952	589.365	760	3388	0.199475	0.224321
GO:0010647	positive regulation of cell communication	155	2.35964e-21	2.37569e-17	1.5327e-19	1.50666	359.737	542	0.0890438	0.134158	129	1.7229e-16	1.73462e-12	1.34466e-14	1.63577	149.777	245	861	0.0643045	0.284553
GO:0051270	regulation of cellular component movement	313	1.60262e-11	1.61352e-07	5.15501e-10	1.46346	221.394	324	0.0548005	0.080198	131	2.35876e-16	2.3748e-12	1.81282e-14	1.88357	81.7597	154	470	0.04042	0.32766
GO:0040012	regulation of locomotion	341	6.57259e-11	6.61728e-07	1.94055e-09	1.44559	223.438	323	0.0553064	0.0799505	132	2.52648e-16	2.54366e-12	1.92702e-14	1.89527	79.6722	151	458	0.0396326	0.329694
GO:0009892	negative regulation of metabolic process	84	1.17948e-40	1.1875e-36	1.4137e-38	1.58193	522.78	827	0.129401	0.204703	133	3.25937e-16	3.28153e-12	2.46732e-14	1.48032	243.191	360	1398	0.0944882	0.257511
GO:0006935	chemotaxis	237	2.10902e-14	2.12336e-10	8.95933e-13	1.59737	180.297	288	0.0446279	0.0712871	134	3.35397e-16	3.37678e-12	2.51999e-14	2.05185	58.9713	121	339	0.0317585	0.356932
GO:0048870	cell motility	405	2.3994e-09	2.41572e-05	5.96473e-08	1.36378	269.105	367	0.0666101	0.0908416	135	3.93299e-16	3.95973e-12	2.93314e-14	1.78576	99.6772	178	573	0.0467192	0.310646
GO:0042330	taxis	238	2.14109e-14	2.15565e-10	9.05736e-13	1.59716	180.32	288	0.0446338	0.0712871	136	4.32775e-16	4.35718e-12	3.20381e-14	2.04581	59.1453	121	340	0.0317585	0.355882
GO:0060485	mesenchyme development	278	6.37133e-13	6.41465e-09	2.30743e-11	1.81394	92.6158	168	0.0229247	0.0415842	137	4.42059e-16	4.45064e-12	3.24865e-14	2.72742	23.8321	65	137	0.0170604	0.474453
GO:0003002	regionalization	121	9.17837e-29	9.24078e-25	7.63701e-27	2.00491	150.132	301	0.0371613	0.074505	138	4.54563e-16	4.57654e-12	3.31634e-14	2.09372	54.4485	114	313	0.0299213	0.364217
GO:2000648	positive regulation of stem cell proliferation	143	2.4068e-23	2.42317e-19	1.69452e-21	2.67415	50.4834	135	0.0124959	0.0334158	139	7.8505e-16	7.90389e-12	5.68625e-14	3.67531	10.6114	39	61	0.0102362	0.639344
GO:0019438	aromatic compound biosynthetic process	27	1.15637e-55	1.16423e-51	4.31197e-53	1.55879	728.13	1135	0.18023	0.280941	140	8.5327e-16	8.59072e-12	6.13623e-14	1.36972	374.529	513	2153	0.134646	0.238272
GO:0019222	regulation of metabolic process	39	1.71431e-50	1.72597e-46	4.42556e-48	1.31129	1493.94	1959	0.369788	0.484901	141	8.92501e-16	8.9857e-12	6.37284e-14	1.22161	859.52	1050	4941	0.275591	0.212508
GO:2000112	regulation of cellular macromolecule biosynthetic process	14	1.84081e-64	1.85333e-60	1.32381e-61	1.477	1023.7	1512	0.253391	0.374257	142	9.55072e-16	9.61567e-12	6.7716e-14	1.29119	558.401	721	3210	0.189239	0.224611
GO:0044271	cellular nitrogen compound biosynthetic process	28	3.06044e-55	3.08125e-51	1.10045e-52	1.55402	732.936	1139	0.18142	0.281931	143	1.03397e-15	1.041e-11	7.2797e-14	1.36495	380.965	520	2190	0.136483	0.237443
GO:0010605	negative regulation of macromolecule metabolic process	91	9.60556e-38	9.67088e-34	1.06273e-35	1.57994	491.79	777	0.12173	0.192327	144	1.10865e-15	1.11619e-11	7.75131e-14	1.48874	227.709	339	1309	0.0889764	0.258976
GO:0010556	regulation of macromolecule biosynthetic process	13	9.01859e-65	9.07992e-61	6.98455e-62	1.47468	1034.12	1525	0.255971	0.377475	145	1.40011e-15	1.40963e-11	9.72157e-14	1.28605	569.186	732	3272	0.192126	0.223716
GO:0060255	regulation of macromolecule metabolic process	25	6.02508e-57	6.06606e-53	2.42642e-54	1.37741	1277.04	1759	0.316098	0.435396	146	1.57932e-15	1.59006e-11	1.08908e-13	1.24543	725.052	903	4168	0.237008	0.216651
GO:0001657	ureteric bud development	174	5.81941e-19	5.85898e-15	3.36723e-17	2.20794	70.654	156	0.0174886	0.0386139	147	1.81254e-15	1.82486e-11	1.2414e-13	3.09062	16.178	50	93	0.0131234	0.537634
GO:0048858	cell projection morphogenesis	435	1.09882e-08	0.000110629	2.54321e-07	1.36072	251.338	342	0.0622125	0.0846535	148	2.01767e-15	2.03139e-11	1.37256e-13	1.88563	76.367	144	439	0.0377953	0.328018
GO:0018130	heterocycle biosynthetic process	26	5.04859e-56	5.08292e-52	1.95497e-53	1.56269	724.393	1132	0.179305	0.280198	149	2.09014e-15	2.10436e-11	1.41232e-13	1.36438	374.529	511	2153	0.134121	0.237343
GO:0061448	connective tissue development	218	6.19758e-16	6.23972e-12	2.86226e-14	1.85633	106.662	198	0.0264015	0.0490099	150	2.62798e-15	2.64585e-11	1.7639e-13	2.40284	32.8778	79	189	0.0207349	0.417989
GO:0001822	kidney development	192	1.25977e-17	1.26834e-13	6.60594e-16	1.83801	123.503	227	0.0305701	0.0561881	151	3.59333e-15	3.61776e-11	2.39587e-13	2.36362	34.2695	81	197	0.0212598	0.411168
GO:0048839	inner ear development	177	1.11071e-18	1.11826e-14	6.31785e-17	1.92447	110.68	213	0.027396	0.0527228	152	3.82833e-15	3.85436e-11	2.53577e-13	2.44967	30.6164	75	176	0.019685	0.426136
GO:0009605	response to external stimulus	196	3.1151e-17	3.13629e-13	1.60015e-15	1.45109	354.217	514	0.0876776	0.127228	153	4.39874e-15	4.42865e-11	2.89454e-13	1.63105	137.948	225	793	0.0590551	0.283733
GO:2000145	regulation of cell motility	304	1.13519e-11	1.14291e-07	3.75957e-10	1.49249	201.676	301	0.0499198	0.074505	154	5.17479e-15	5.20998e-11	3.38311e-13	1.88477	74.2795	140	427	0.0367454	0.327869
GO:1901362	organic cyclic compound biosynthetic process	33	1.5359e-53	1.54634e-49	4.68588e-51	1.53479	753.2	1156	0.186436	0.286139	155	5.94702e-15	5.98746e-11	3.86288e-13	1.34811	393.142	530	2260	0.139108	0.234513
GO:0030334	regulation of cell migration	302	1.00363e-11	1.01046e-07	3.34588e-10	1.50237	195.691	294	0.0484383	0.0727723	156	7.13122e-15	7.17972e-11	4.60238e-13	1.9021	70.9743	135	408	0.0354331	0.330882
GO:0072091	regulation of stem cell proliferation	154	1.89751e-21	1.91041e-17	1.24053e-19	2.44381	59.3336	145	0.0146865	0.0358911	157	9.1056e-15	9.16752e-11	5.83918e-13	3.19364	14.0905	45	81	0.011811	0.555556
GO:0021953	central nervous system neuron differentiation	148	5.74452e-23	5.78359e-19	3.90783e-21	2.03578	112.979	230	0.0279651	0.0569307	158	9.17726e-15	9.23966e-11	5.84789e-13	2.49937	28.007	70	161	0.0183727	0.434783
GO:0030111	regulation of Wnt receptor signaling pathway	127	1.52066e-27	1.53101e-23	1.20552e-25	2.23684	100.588	225	0.0248981	0.0556931	159	1.13468e-14	1.14239e-10	7.18485e-13	2.40861	31.1382	75	179	0.019685	0.418994
GO:0030326	embryonic limb morphogenesis	246	3.41282e-14	3.43602e-10	1.39676e-12	1.98414	73.5837	146	0.0182138	0.0361386	160	1.179e-14	1.18702e-10	7.41887e-13	2.69464	22.2665	60	128	0.015748	0.46875
GO:0051216	cartilage development	216	5.4932e-16	5.53055e-12	2.56044e-14	1.96311	87.1064	171	0.021561	0.0423267	161	1.18761e-14	1.19568e-10	7.4266e-13	2.56354	25.7456	66	148	0.0173228	0.445946
GO:0048705	skeletal system morphogenesis	144	3.28708e-23	3.30943e-19	2.29821e-21	2.09243	104.185	218	0.0257884	0.0539604	162	1.20938e-14	1.2176e-10	7.51604e-13	2.33444	34.2695	80	197	0.0209974	0.406091
GO:0050678	regulation of epithelial cell proliferation	179	1.38993e-18	1.39938e-14	7.81778e-17	1.89727	115.956	220	0.0287021	0.0544555	163	1.26761e-14	1.27623e-10	7.82965e-13	2.2939	36.183	83	208	0.0217848	0.399039
GO:0048762	mesenchymal cell differentiation	296	5.58463e-12	5.62261e-08	1.89953e-10	1.86232	76.786	143	0.0190064	0.035396	164	1.34647e-14	1.35562e-10	8.26599e-13	2.84791	18.9613	54	109	0.0141732	0.495413
GO:0001525	angiogenesis	236	1.82583e-14	1.83825e-10	7.7892e-13	1.72752	127.929	221	0.0316655	0.054703	165	1.37124e-14	1.38056e-10	8.36703e-13	2.12353	46.6204	99	268	0.0259843	0.369403
GO:0043010	camera-type eye development	83	7.66501e-41	7.71714e-37	9.29775e-39	2.35918	128.011	302	0.0316858	0.0747525	166	2.15211e-14	2.16675e-10	1.30527e-12	2.12828	45.5767	97	262	0.0254593	0.370229
GO:0030855	epithelial cell differentiation	249	4.1176e-14	4.1456e-10	1.6649e-12	1.51595	228.239	346	0.0564949	0.0856436	167	3.5961e-14	3.62055e-10	2.16799e-12	1.7913	85.4128	153	491	0.0401575	0.311609
GO:0001654	eye development	93	4.38522e-37	4.41504e-33	4.74735e-35	2.16028	151.832	328	0.0375822	0.0811881	168	3.90671e-14	3.93328e-10	2.34124e-12	2.03002	52.7089	107	303	0.028084	0.353135
GO:0060537	muscle tissue development	423	5.40217e-09	5.4389e-05	1.28579e-07	1.50162	145.177	218	0.0359348	0.0539604	169	6.63322e-14	6.67833e-10	3.95167e-12	2.08651	46.9683	98	270	0.0257218	0.362963
GO:0048864	stem cell development	122	1.67685e-28	1.68825e-24	1.38381e-26	2.21042	108.124	239	0.0267634	0.0591584	170	6.77111e-14	6.81715e-10	4.01009e-12	2.29942	33.9216	78	195	0.0204724	0.4
GO:0032990	cell part morphogenesis	486	5.8879e-08	0.000592794	1.21974e-06	1.33673	256.596	343	0.0635139	0.084901	171	7.10709e-14	7.15542e-10	4.18446e-12	1.80492	80.8899	146	465	0.0383202	0.313978
GO:0030030	cell projection organization	481	4.86522e-08	0.000489831	1.01836e-06	1.29083	336.217	434	0.083222	0.107426	172	7.55403e-14	7.60539e-10	4.42174e-12	1.6584	116.377	193	669	0.0506562	0.28849
GO:0045596	negative regulation of cell differentiation	133	3.67262e-26	3.69759e-22	2.78015e-24	1.77531	212.92	378	0.052703	0.0935644	173	9.35056e-14	9.41415e-10	5.4417e-12	1.80741	79.6722	144	458	0.0377953	0.31441
GO:0034645	cellular macromolecule biosynthetic process	73	2.51957e-44	2.5367e-40	3.47494e-42	1.43579	874.779	1256	0.216529	0.310891	174	1.47697e-13	1.48701e-09	8.54603e-12	1.29696	467.248	606	2686	0.159055	0.225614
GO:0070887	cellular response to chemical stimulus	351	1.38797e-10	1.39741e-06	3.98121e-09	1.28841	460.258	593	0.113925	0.146782	175	1.59038e-13	1.6012e-09	9.14968e-12	1.46671	211.357	310	1215	0.0813648	0.255144
GO:0009059	macromolecule biosynthetic process	79	5.54079e-43	5.57847e-39	7.06135e-41	1.42609	882.133	1258	0.21835	0.311386	177	1.64808e-13	1.65928e-09	9.37448e-12	1.29491	471.075	610	2708	0.160105	0.225259
GO:0071495	cellular response to endogenous stimulus	401	1.2971e-09	1.30592e-05	3.25665e-08	1.39343	241.849	337	0.0598635	0.0834158	176	1.64287e-13	1.65404e-09	9.39797e-12	1.74099	91.3273	159	525	0.0417323	0.302857
GO:0071363	cellular response to growth factor stimulus	213	5.07287e-16	5.10737e-12	2.39783e-14	1.79904	121.176	218	0.029994	0.0539604	180	3.34616e-13	3.36891e-09	1.87162e-11	2.14946	40.01	86	230	0.0225722	0.373913
GO:0035270	endocrine system development	254	5.96384e-14	6.00439e-10	2.36394e-12	1.93421	79.102	153	0.0195797	0.0378713	181	3.56337e-13	3.5876e-09	1.9821e-11	2.60054	21.9185	57	126	0.0149606	0.452381
GO:0048608	reproductive structure development	117	2.40006e-30	2.41638e-26	2.06529e-28	2.15583	124.778	269	0.0308857	0.0665842	182	4.26537e-13	4.29437e-09	2.35954e-11	2.09247	43.4892	91	250	0.0238845	0.364
GO:0061458	reproductive system development	119	3.59779e-30	3.62226e-26	3.04391e-28	2.14637	125.794	270	0.0311371	0.0668317	183	4.4264e-13	4.4565e-09	2.43525e-11	2.08215	44.185	92	254	0.024147	0.362205
GO:0040007	growth	262	1.63848e-13	1.64963e-09	6.29628e-12	1.58611	174.011	276	0.0430719	0.0683168	184	4.88891e-13	4.92215e-09	2.67508e-11	1.89995	61.5807	117	354	0.0307087	0.330508
GO:0022612	gland morphogenesis	418	3.99817e-09	4.02536e-05	9.63004e-08	1.77565	67.5809	120	0.0167279	0.029703	185	5.00683e-13	5.04087e-09	2.7248e-11	2.73997	18.6134	51	107	0.0133858	0.476635
GO:0070848	response to growth factor stimulus	164	3.97766e-20	4.0047e-16	2.44189e-18	1.8868	128.79	243	0.0318786	0.0601485	186	5.355e-13	5.39141e-09	2.89861e-11	2.09462	42.9673	90	247	0.023622	0.364372
GO:0009058	biosynthetic process	100	2.45673e-34	2.47344e-30	2.47344e-32	1.32587	1083.82	1437	0.268272	0.355693	187	6.3328e-13	6.37586e-09	3.40955e-11	1.24577	610.066	760	3507	0.199475	0.216709
GO:0048584	positive regulation of response to stimulus	152	1.70922e-22	1.72084e-18	1.13213e-20	1.47326	424.229	625	0.105007	0.154703	188	6.87116e-13	6.91788e-09	3.67973e-11	1.47584	193.788	286	1114	0.0750656	0.256732
GO:0048585	negative regulation of response to stimulus	195	3.10989e-17	3.13104e-13	1.60566e-15	1.46346	338.24	495	0.0837228	0.122525	190	7.46758e-13	7.51837e-09	3.95703e-11	1.55238	147.515	229	848	0.060105	0.270047
GO:0008283	cell proliferation	288	3.38293e-12	3.40593e-08	1.18262e-10	1.53055	185.554	284	0.0459292	0.070297	191	7.63573e-13	7.68766e-09	4.02495e-11	1.82271	71.3222	130	410	0.0341207	0.317073
GO:0044249	cellular biosynthetic process	95	2.75259e-36	2.77131e-32	2.91717e-34	1.34337	1051.09	1412	0.260171	0.349505	192	8.00964e-13	8.0641e-09	4.20005e-11	1.25073	586.06	733	3369	0.192388	0.217572
GO:0010464	regulation of mesenchymal cell proliferation	338	6.1573e-11	6.19917e-07	1.83407e-09	2.25132	35.9789	81	0.00890568	0.0200495	193	8.18235e-13	8.23799e-09	4.26839e-11	3.92584	7.13223	28	41	0.00734908	0.682927
GO:0010720	positive regulation of cell development	207	2.63131e-16	2.6492e-12	1.27981e-14	1.94071	92.7498	180	0.0229579	0.0445545	194	8.58894e-13	8.64735e-09	4.45739e-11	2.3629	28.3549	67	163	0.0175853	0.411043
GO:0035051	cardiocyte differentiation	424	5.4903e-09	5.52764e-05	1.30369e-07	1.7798	65.7376	117	0.0162717	0.0289604	195	8.83542e-13	8.8955e-09	4.56179e-11	2.73741	18.2655	50	105	0.0131234	0.476191
GO:0008285	negative regulation of cell proliferation	165	4.11316e-20	4.14113e-16	2.50978e-18	1.66726	211.125	352	0.0522586	0.0871287	197	1.01162e-12	1.01849e-08	5.17002e-11	1.76975	79.6722	141	458	0.0370079	0.30786
GO:0048589	developmental growth	198	5.04178e-17	5.07606e-13	2.56367e-15	1.87776	109.705	206	0.0271547	0.0509901	198	1.09788e-12	1.10535e-08	5.58255e-11	2.19798	35.4872	78	204	0.0204724	0.382353
GO:0014031	mesenchymal cell development	357	1.80238e-10	1.81464e-06	5.08303e-09	1.87064	64.6837	121	0.0160108	0.0299505	199	1.18786e-12	1.19593e-08	6.00971e-11	2.8144	16.6998	47	96	0.012336	0.489583
GO:0030856	regulation of epithelial cell differentiation	215	5.31126e-16	5.34738e-12	2.48715e-14	2.34914	48.5284	114	0.012012	0.0282178	200	1.38573e-12	1.39515e-08	6.97576e-11	2.87428	15.6561	45	90	0.011811	0.5
GO:0045666	positive regulation of neuron differentiation	490	7.13065e-08	0.000717914	1.46513e-06	1.76668	57.7353	102	0.0142909	0.0252475	201	1.48314e-12	1.49323e-08	7.42898e-11	3.22268	11.4811	37	66	0.00971129	0.560606
GO:0030178	negative regulation of Wnt receptor signaling pathway	150	1.25851e-22	1.26706e-18	8.44709e-21	2.39919	66.2724	159	0.0164041	0.0393564	202	1.67509e-12	1.68648e-08	8.3489e-11	2.64535	19.6571	52	113	0.0136483	0.460177
GO:0009968	negative regulation of signal transduction	163	2.21192e-20	2.22696e-16	1.36623e-18	1.55709	292.212	455	0.0723298	0.112624	203	1.84744e-12	1.86e-08	9.16256e-11	1.60045	122.466	196	704	0.0514436	0.278409
GO:0071310	cellular response to organic substance	421	4.78749e-09	4.82005e-05	1.1449e-07	1.29013	385.233	497	0.0953547	0.12302	204	2.27078e-12	2.28622e-08	1.1207e-10	1.49886	170.13	255	978	0.0669291	0.260736
GO:1901576	organic substance biosynthetic process	105	1.4794e-33	1.48946e-29	1.41853e-31	1.32638	1063.05	1410	0.26313	0.34901	205	2.65103e-12	2.66906e-08	1.30198e-10	1.24175	597.541	742	3435	0.194751	0.216012
GO:0010648	negative regulation of cell communication	183	2.27751e-18	2.29299e-14	1.253e-16	1.50948	306.728	463	0.0759228	0.114604	206	4.0848e-12	4.11258e-08	1.9964e-10	1.57559	128.206	202	737	0.0530184	0.274084
GO:0023057	negative regulation of signaling	187	3.96525e-18	3.99221e-14	2.13487e-16	1.50537	306.902	462	0.0759658	0.114356	207	5.04727e-12	5.0816e-08	2.45488e-10	1.5742	127.684	201	734	0.0527559	0.273842
GO:0060541	respiratory system development	137	1.25785e-24	1.2664e-20	9.24381e-23	2.10806	108.156	228	0.0267713	0.0564356	208	6.34824e-12	6.39141e-08	3.07279e-10	2.1815	33.9216	74	195	0.0194226	0.379487
GO:0060560	developmental growth involved in morphogenesis	275	3.69538e-13	3.72051e-09	1.35291e-11	2.04821	60.5406	124	0.0149853	0.0306931	209	6.57039e-12	6.61507e-08	3.16511e-10	2.8104	15.6561	44	90	0.0115486	0.488889
GO:0051240	positive regulation of multicellular organismal process	449	2.1201e-08	0.000213451	4.75393e-07	1.36898	232.289	318	0.0574973	0.0787129	210	8.21585e-12	8.27171e-08	3.93891e-10	1.69407	88.544	150	509	0.0393701	0.294695
GO:0007548	sex differentiation	128	1.98314e-27	1.99662e-23	1.55986e-25	2.14182	114.856	246	0.0284296	0.0608911	212	1.30937e-11	1.31827e-07	6.21828e-10	2.0461	41.0538	84	236	0.0220472	0.355932
GO:0021543	pallium development	257	6.97161e-14	7.01901e-10	2.73113e-12	1.97043	73.5879	145	0.0182148	0.0358911	211	1.30563e-11	1.31451e-07	6.22989e-10	2.53326	20.5269	52	118	0.0136483	0.440678
GO:0030323	respiratory tube development	157	4.09083e-21	4.11865e-17	2.62334e-19	2.05025	100.963	207	0.0249909	0.0512376	214	2.15977e-11	2.17446e-07	1.0161e-09	2.22632	30.0945	67	173	0.0175853	0.387283
GO:0002065	columnar/cuboidal epithelial cell differentiation	408	2.8408e-09	2.86012e-05	7.0101e-08	1.9174	51.111	98	0.0126512	0.0242574	216	2.6868e-11	2.70507e-07	1.25235e-09	2.95196	12.8728	38	74	0.00997375	0.513513
GO:0048565	digestive tract development	227	1.60308e-15	1.61398e-11	7.11007e-14	2.06545	70.6867	146	0.0174967	0.0361386	215	2.67663e-11	2.69483e-07	1.25341e-09	2.54361	19.6571	50	113	0.0131234	0.442478
GO:0016070	RNA metabolic process	23	2.78478e-57	2.80372e-53	1.21901e-54	1.54096	781.981	1205	0.19356	0.298267	217	2.83118e-11	2.85043e-07	1.31356e-09	1.28005	428.108	548	2461	0.143832	0.222674
GO:0030324	lung development	153	1.00181e-21	1.00862e-17	6.59227e-20	2.08088	98.9965	206	0.0245041	0.0509901	220	3.62373e-11	3.64837e-07	1.65835e-09	2.21874	29.7466	66	171	0.0173228	0.385965
GO:0048546	digestive tract morphogenesis	175	7.13666e-19	7.18519e-15	4.10582e-17	2.69549	39.3249	106	0.00973388	0.0262376	221	3.67243e-11	3.6974e-07	1.67303e-09	3.3815	8.87179	30	51	0.00787402	0.588235
GO:0035148	tube formation	251	5.02364e-14	5.0578e-10	2.01506e-12	1.97387	73.9663	146	0.0183085	0.0361386	222	4.15872e-11	4.187e-07	1.88604e-09	2.42517	22.2665	54	128	0.0141732	0.421875
GO:1901861	regulation of muscle tissue development	318	2.48375e-11	2.50065e-07	7.86366e-10	1.88895	68.2917	129	0.0169039	0.0319307	224	4.91565e-11	4.94907e-07	2.20941e-09	2.61815	17.5696	46	101	0.0120735	0.455446
GO:0072006	nephron development	276	4.23073e-13	4.25949e-09	1.54329e-11	2.08675	56.5472	118	0.0139968	0.0292079	225	5.26756e-11	5.30338e-07	2.35706e-09	2.74363	15.3082	42	88	0.0110236	0.477273
GO:0040017	positive regulation of locomotion	420	4.18215e-09	4.21059e-05	1.00252e-07	1.56321	119.626	187	0.0296103	0.0462871	226	5.80444e-11	5.84391e-07	2.5858e-09	1.98629	42.7933	85	246	0.0223097	0.345529
GO:0002053	positive regulation of mesenchymal cell proliferation	335	5.06181e-11	5.09623e-07	1.52126e-09	2.36253	31.3224	74	0.00775306	0.0183168	227	7.8865e-11	7.94013e-07	3.49786e-09	3.83237	6.26244	24	36	0.00629921	0.666667
GO:0048593	camera-type eye morphogenesis	131	1.4061e-26	1.41566e-22	1.08065e-24	2.67241	58.0001	155	0.0143565	0.0383663	228	8.62712e-11	8.68578e-07	3.80956e-09	2.61298	17.2217	45	99	0.011811	0.454545
GO:0016202	regulation of striated muscle tissue development	290	4.2906e-12	4.31978e-08	1.48958e-10	1.9475	65.7254	128	0.0162687	0.0316832	228	8.62712e-11	8.68578e-07	3.80956e-09	2.61298	17.2217	45	99	0.011811	0.454545
GO:0009952	anterior/posterior pattern specification	228	2.87549e-15	2.89505e-11	1.26976e-13	1.91725	90.2335	173	0.022335	0.0428218	231	1.25999e-10	1.26856e-06	5.4916e-09	2.07745	35.1393	73	202	0.0191601	0.361386
GO:0009719	response to endogenous stimulus	370	3.86401e-10	3.89028e-06	1.05143e-08	1.33359	342.685	457	0.0848231	0.113119	232	1.27745e-10	1.28613e-06	5.54367e-09	1.49137	147.515	220	848	0.0577428	0.259434
GO:0048634	regulation of muscle organ development	295	5.48567e-12	5.52297e-08	1.87219e-10	1.94005	65.9775	128	0.0163311	0.0316832	233	1.30536e-10	1.31424e-06	5.64051e-09	2.58685	17.3957	45	100	0.011811	0.45
GO:0045137	development of primary sexual characteristics	134	1.71721e-25	1.72889e-21	1.29021e-23	2.1462	105.769	227	0.0261803	0.0561881	234	1.33799e-10	1.34709e-06	5.7568e-09	2.05306	36.5309	75	210	0.019685	0.357143
GO:0050769	positive regulation of neurogenesis	284	1.75366e-12	1.76558e-08	6.21685e-11	1.90355	74.0721	141	0.0183347	0.034901	235	1.48957e-10	1.4997e-06	6.38168e-09	2.42294	21.0488	51	121	0.0133858	0.421488
GO:0043410	positive regulation of MAPK cascade	359	2.2623e-10	2.27769e-06	6.34453e-09	1.57336	134.743	212	0.0333523	0.0524753	236	1.69781e-10	1.70935e-06	7.24302e-09	1.89558	48.5339	92	279	0.024147	0.329749
GO:0003006	developmental process involved in reproduction	169	6.23724e-20	6.27965e-16	3.71577e-18	1.72036	183.101	315	0.045322	0.0779703	237	1.89204e-10	1.90491e-06	8.03757e-09	1.70328	75.1493	128	432	0.0335958	0.296296
GO:0032501	multicellular organismal process	85	1.77649e-39	1.78857e-35	2.1042e-37	1.22172	1876.86	2293	0.464568	0.567574	238	1.94701e-10	1.96025e-06	8.23635e-09	1.15009	1064.27	1224	6118	0.32126	0.200065
GO:0045665	negative regulation of neuron differentiation	191	1.20021e-17	1.20837e-13	6.32655e-16	2.57087	41.6201	107	0.010302	0.0264851	239	2.71198e-10	2.73042e-06	1.14244e-08	3.12641	9.91553	31	57	0.00813648	0.54386
GO:0060675	ureteric bud morphogenesis	374	4.18214e-10	4.21058e-06	1.12582e-08	2.10285	40.8968	86	0.010123	0.0212871	239	2.71198e-10	2.73042e-06	1.14244e-08	3.12641	9.91553	31	57	0.00813648	0.54386
GO:0060977	coronary vasculature morphogenesis	309	1.34038e-11	1.3495e-07	4.36731e-10	3.03213	16.8199	51	0.00416333	0.0126238	241	2.8284e-10	2.84763e-06	1.18159e-08	4.49887	4.001	18	23	0.00472441	0.782609
GO:0090090	negative regulation of canonical Wnt receptor signaling pathway	167	4.44686e-20	4.4771e-16	2.6809e-18	2.49457	52.1133	130	0.0128993	0.0321782	242	2.90358e-10	2.92332e-06	1.20798e-08	2.73407	14.2645	39	82	0.0102362	0.47561
GO:0055123	digestive system development	245	3.31802e-14	3.34058e-10	1.3635e-12	1.97956	74.259	147	0.0183809	0.0363861	243	3.02642e-10	3.047e-06	1.25391e-08	2.38355	21.3967	51	123	0.0133858	0.414634
GO:0050679	positive regulation of epithelial cell proliferation	391	9.06626e-10	9.12791e-06	2.3345e-08	1.81369	67.2661	122	0.01665	0.030198	244	3.09278e-10	3.11381e-06	1.27615e-08	2.42827	20.179	49	116	0.0128609	0.422414
GO:0090092	regulation of transmembrane receptor protein serine/threonine kinase signaling pathway	326	3.42922e-11	3.45253e-07	1.05906e-09	1.79627	81.8361	147	0.0202565	0.0363861	245	3.3592e-10	3.38204e-06	1.38042e-08	2.25978	25.2237	57	145	0.0149606	0.393103
GO:0022604	regulation of cell morphogenesis	297	5.84005e-12	5.87977e-08	1.97972e-10	1.61811	138.433	224	0.0342657	0.0554455	246	3.62809e-10	3.65276e-06	1.48486e-08	1.85123	51.3172	95	295	0.0249344	0.322034
GO:0042471	ear morphogenesis	171	1.35581e-19	1.36502e-15	7.98261e-18	2.18686	75.4506	165	0.0186759	0.0408416	247	3.66438e-10	3.6893e-06	1.49364e-08	2.39523	20.8748	50	120	0.0131234	0.416667
GO:0030879	mammary gland development	247	3.41963e-14	3.44288e-10	1.39388e-12	2.01182	70.0859	141	0.017348	0.034901	247	3.66438e-10	3.6893e-06	1.49364e-08	2.39523	20.8748	50	120	0.0131234	0.416667
GO:0048706	embryonic skeletal system development	325	3.36595e-11	3.38884e-07	1.04272e-09	1.85947	71.5256	133	0.0177044	0.0329208	247	3.66438e-10	3.6893e-06	1.49364e-08	2.39523	20.8748	50	120	0.0131234	0.416667
GO:0060021	palate development	271	2.94759e-13	2.96764e-09	1.09507e-11	2.09115	56.9065	119	0.0140858	0.0294555	251	5.12972e-10	5.1646e-06	2.05761e-08	2.73056	13.9165	38	80	0.00997375	0.475
GO:0040008	regulation of growth	306	1.2235e-11	1.23182e-07	4.02556e-10	1.47413	215.043	317	0.0532284	0.0784654	253	5.31981e-10	5.35598e-06	2.11699e-08	1.64076	84.7169	139	487	0.0364829	0.285421
GO:0051272	positive regulation of cellular component movement	392	9.69155e-10	9.75745e-06	2.48914e-08	1.5997	115.647	185	0.0286254	0.0457921	256	5.87955e-10	5.91953e-06	2.31232e-08	1.93189	42.4454	82	244	0.0215223	0.336066
GO:0030335	positive regulation of cell migration	403	1.80225e-09	1.81451e-05	4.5025e-08	1.60219	111.098	178	0.0274995	0.0440594	257	5.9923e-10	6.03305e-06	2.34749e-08	1.95748	40.358	79	232	0.0207349	0.340517
GO:0051128	regulation of cellular component organization	413	3.57284e-09	3.59713e-05	8.70976e-08	1.25488	487.697	612	0.120717	0.151485	259	7.45686e-10	7.50757e-06	2.89867e-08	1.37764	218.49	301	1256	0.0790026	0.23965
GO:0048663	neuron fate commitment	343	7.07938e-11	7.12752e-07	2.078e-09	2.10006	44.7607	94	0.0110794	0.0232673	258	7.44584e-10	7.49647e-06	2.90561e-08	2.87428	11.8291	34	68	0.00892388	0.5
GO:0043408	regulation of MAPK cascade	340	6.54323e-11	6.58773e-07	1.93757e-09	1.48684	191.008	284	0.0472793	0.070297	260	9.20144e-10	9.26401e-06	3.56308e-08	1.67279	75.3233	126	433	0.0330709	0.290993
GO:0042692	muscle cell differentiation	378	4.87596e-10	4.90912e-06	1.29871e-08	1.62931	109.862	179	0.0271937	0.0443069	262	9.43234e-10	9.49648e-06	3.62461e-08	1.99831	36.5309	73	210	0.0191601	0.347619
GO:0060828	regulation of canonical Wnt receptor signaling pathway	162	1.55095e-20	1.5615e-16	9.63887e-19	2.25148	72.3968	163	0.01792	0.0403465	263	9.51701e-10	9.58172e-06	3.64324e-08	2.29942	22.6144	52	130	0.0136483	0.4
GO:0048592	eye morphogenesis	156	3.42166e-21	3.44492e-17	2.20829e-19	2.21797	78.45	174	0.0194183	0.0430693	264	1.06583e-09	1.07308e-05	4.06469e-08	2.27368	23.3102	53	134	0.0139108	0.395522
GO:2000736	regulation of stem cell differentiation	231	3.7348e-15	3.76019e-11	1.62779e-13	2.35301	45.4738	107	0.0112559	0.0264851	265	1.11863e-09	1.12624e-05	4.24996e-08	2.79444	12.5249	35	72	0.00918635	0.486111
GO:0021536	diencephalon development	266	2.00343e-13	2.01706e-09	7.58292e-12	2.20539	48.5174	107	0.0120093	0.0264851	265	1.11863e-09	1.12624e-05	4.24996e-08	2.79444	12.5249	35	72	0.00918635	0.486111
GO:0001708	cell fate specification	209	3.40649e-16	3.42966e-12	1.64098e-14	2.43121	44.4222	108	0.0109956	0.0267327	267	1.22297e-09	1.23129e-05	4.61156e-08	2.83262	12.003	34	69	0.00892388	0.492754
GO:0021987	cerebral cortex development	310	1.34744e-11	1.35661e-07	4.37615e-10	2.02115	54.9192	111	0.0135939	0.0274752	268	1.24889e-09	1.25738e-05	4.69171e-08	2.66397	14.2645	38	82	0.00997375	0.463415
GO:0001701	in utero embryonic development	161	1.22606e-20	1.23439e-16	7.66704e-19	1.79944	158.382	285	0.0392035	0.0705445	269	1.2999e-09	1.30873e-05	4.86519e-08	1.70823	67.3213	115	387	0.0301837	0.297158
GO:0072073	kidney epithelium development	239	2.30168e-14	2.31733e-10	9.69593e-13	2.33936	43.6016	102	0.0107925	0.0252475	270	1.32027e-09	1.32924e-05	4.92312e-08	2.87428	11.4811	33	66	0.00866142	0.5
GO:2000147	positive regulation of cell motility	412	3.28869e-09	3.31105e-05	8.03653e-08	1.58846	112.058	178	0.0277372	0.0440594	276	2.29721e-09	2.31283e-05	8.37983e-08	1.90813	41.4017	79	238	0.0207349	0.331933
GO:0060348	bone development	329	3.76744e-11	3.79306e-07	1.15291e-09	1.87642	68.7478	129	0.0170168	0.0319307	277	2.61459e-09	2.63237e-05	9.50314e-08	2.34941	20.005	47	115	0.012336	0.408696
GO:0060688	regulation of morphogenesis of a branching structure	373	4.16703e-10	4.19537e-06	1.12476e-08	2.18278	36.1924	79	0.0089585	0.0195545	278	2.67398e-09	2.69217e-05	9.68405e-08	3.03106	9.56762	29	55	0.00761155	0.527273
GO:0010467	gene expression	46	9.80487e-49	9.87155e-45	2.14599e-46	1.46145	867.63	1268	0.21476	0.313861	279	2.87194e-09	2.89147e-05	1.03637e-07	1.23022	486.905	599	2799	0.157218	0.214005
GO:0072175	epithelial tube formation	289	3.54684e-12	3.57096e-08	1.23563e-10	1.95326	65.5314	128	0.0162206	0.0316832	280	3.65829e-09	3.68316e-05	1.31541e-07	2.32916	20.179	47	116	0.012336	0.405172
GO:0090287	regulation of cellular response to growth factor stimulus	301	9.82762e-12	9.89444e-08	3.28719e-10	1.91135	68.0147	130	0.0168353	0.0321782	281	4.14797e-09	4.17618e-05	1.48618e-07	2.23799	22.7883	51	131	0.0133858	0.389313
GO:0060349	bone morphogenesis	350	1.2027e-10	1.21088e-06	3.45965e-09	2.06891	45.9178	95	0.0113658	0.0235149	284	4.42075e-09	4.45081e-05	1.56719e-07	2.68266	13.0467	35	75	0.00918635	0.466667
GO:0072009	nephron epithelium development	282	1.17217e-12	1.18014e-08	4.18488e-11	2.41596	34.3549	83	0.00850369	0.0205446	285	4.59653e-09	4.62779e-05	1.62378e-07	3.18005	8.17597	26	47	0.00682415	0.553191
GO:0051130	positive regulation of cellular component organization	322	2.80047e-11	2.81952e-07	8.75627e-10	1.46805	212.527	312	0.0526057	0.0772277	287	6.84198e-09	6.8885e-05	2.40017e-07	1.57178	90.9794	143	523	0.0375328	0.273423
GO:2000177	regulation of neural precursor cell proliferation	193	2.31039e-17	2.3261e-13	1.20523e-15	2.70856	35.4432	96	0.00877306	0.0237624	288	7.3744e-09	7.42454e-05	2.57797e-07	2.87428	10.4374	30	60	0.00787402	0.5
GO:0044763	single-organism cellular process	98	6.9381e-35	6.98527e-31	7.12783e-33	1.14473	2549.08	2918	0.63096	0.722277	289	8.62047e-09	8.67909e-05	3.00314e-07	1.09131	1732.78	1891	9961	0.496325	0.18984
GO:0001838	embryonic epithelial tube formation	294	5.42136e-12	5.45822e-08	1.85654e-10	1.95209	64.5464	126	0.0159768	0.0311881	290	8.65577e-09	8.71462e-05	3.00504e-07	2.29942	20.005	46	115	0.0120735	0.4
GO:0001656	metanephros development	264	1.79236e-13	1.80455e-09	6.83542e-12	2.0999	57.1457	120	0.014145	0.029703	291	8.98554e-09	9.04664e-05	3.10881e-07	2.58685	13.9165	36	80	0.00944882	0.45
GO:2000179	positive regulation of neural precursor cell proliferation	149	1.21011e-22	1.21833e-18	8.17674e-21	3.64997	22.7399	83	0.0056287	0.0205446	292	1.15677e-08	0.000116464	3.98849e-07	3.41806	6.4364	22	37	0.00577428	0.594595
GO:0021983	pituitary gland development	311	1.37367e-11	1.38301e-07	4.44699e-10	2.40015	31.6647	76	0.00783779	0.0188119	294	1.42318e-08	0.000143286	4.87365e-07	3.2085	7.48014	24	43	0.00629921	0.55814
GO:0016331	morphogenesis of embryonic epithelium	235	9.79566e-15	9.86228e-11	4.19671e-13	1.9749	77.9787	154	0.0193017	0.0381188	295	1.45325e-08	0.000146314	4.95978e-07	2.15054	24.18	52	139	0.0136483	0.374101
GO:0048638	regulation of developmental growth	342	6.96546e-11	7.01283e-07	2.05053e-09	1.86304	68.7051	128	0.0170062	0.0316832	296	1.47033e-08	0.000148033	5.00112e-07	2.28925	19.6571	45	113	0.011811	0.39823
GO:0060976	coronary vasculature development	365	3.16378e-10	3.1853e-06	8.72684e-09	2.67112	20.2162	54	0.00500402	0.0133663	298	1.61278e-08	0.000162375	5.44882e-07	3.59285	5.56661	20	32	0.00524934	0.625
GO:0010001	glial cell differentiation	400	1.2402e-09	1.24863e-05	3.12158e-08	1.84582	61.7612	114	0.0152874	0.0282178	300	2.02234e-08	0.000203609	6.78696e-07	2.26917	19.8311	45	114	0.011811	0.394737
GO:0030177	positive regulation of Wnt receptor signaling pathway	376	4.56594e-10	4.59699e-06	1.2226e-08	2.06878	43.0206	89	0.0106487	0.0220297	302	2.11812e-08	0.000213252	7.06133e-07	2.63476	12.5249	33	72	0.00866142	0.458333
GO:0042472	inner ear morphogenesis	199	8.45401e-17	8.51149e-13	4.27713e-15	2.23722	59.4488	133	0.0147151	0.0329208	303	2.37851e-08	0.000239469	7.90326e-07	2.35691	17.3957	41	100	0.0107612	0.41
GO:0010632	regulation of epithelial cell migration	330	4.05444e-11	4.082e-07	1.23697e-09	1.98264	55.986	111	0.0138579	0.0274752	304	2.47072e-08	0.000248752	8.18265e-07	2.41068	16.178	39	93	0.0102362	0.419355
GO:0016055	Wnt receptor signaling pathway	250	4.91525e-14	4.94868e-10	1.97947e-12	1.83525	96.9897	178	0.0240074	0.0440594	306	2.69376e-08	0.000271208	8.863e-07	1.86509	39.1403	73	225	0.0191601	0.324444
GO:0010033	response to organic substance	252	5.16851e-14	5.20366e-10	2.06494e-12	1.3064	551.899	721	0.136609	0.178465	307	2.78747e-08	0.000280642	9.14144e-07	1.2954	278.679	361	1602	0.0947507	0.225343
GO:0044699	single-organism process	135	3.52945e-25	3.55345e-21	2.63219e-23	1.10082	2869.66	3159	0.710313	0.781931	308	3.21218e-08	0.000323402	1.05001e-06	1.07669	1980.15	2132	11383	0.55958	0.187297
GO:0051241	negative regulation of multicellular organismal process	482	5.1688e-08	0.000520395	1.07966e-06	1.48132	136.365	202	0.0337537	0.05	309	3.24971e-08	0.000327181	1.05884e-06	1.71544	54.7964	94	315	0.0246719	0.298413
GO:0021872	forebrain generation of neurons	204	1.33083e-16	1.33988e-12	6.56803e-15	2.504	41.9328	105	0.0103794	0.0259901	310	3.81358e-08	0.000383951	1.23855e-06	2.82385	9.91553	28	57	0.00734908	0.491228
GO:0050680	negative regulation of epithelial cell proliferation	214	5.08226e-16	5.11681e-12	2.39103e-14	2.31092	51.0618	118	0.0126391	0.0292079	313	4.26211e-08	0.00042911	1.37096e-06	2.4005	15.8301	38	91	0.00997375	0.417582
GO:0021510	spinal cord development	358	2.18485e-10	2.19971e-06	6.14444e-09	2.02722	47.8489	97	0.0118438	0.0240099	314	4.29385e-08	0.000432305	1.37677e-06	2.46367	14.6124	36	84	0.00944882	0.428571
GO:0021879	forebrain neuron differentiation	208	3.06944e-16	3.09031e-12	1.48573e-14	2.64334	35.1828	93	0.00870862	0.0230198	317	4.67695e-08	0.000470875	1.48541e-06	3.0659	7.82805	24	45	0.00629921	0.533333
GO:0048704	embryonic skeletal system morphogenesis	244	2.97916e-14	2.99942e-10	1.22927e-12	2.2965	45.7219	105	0.0113173	0.0259901	319	5.15086e-08	0.000518589	1.62567e-06	2.41701	15.3082	37	88	0.00971129	0.420455
GO:0010941	regulation of cell death	470	3.58381e-08	0.000360818	7.67697e-07	1.26436	404.158	511	0.100039	0.126485	321	5.86737e-08	0.000590727	1.84027e-06	1.37169	175.696	241	1010	0.0632546	0.238614
GO:0001570	vasculogenesis	437	1.14096e-08	0.000114872	2.62865e-07	1.92858	46.148	89	0.0114228	0.0220297	322	6.0962e-08	0.000613766	1.9061e-06	2.50578	13.5686	34	78	0.00892388	0.435897
GO:0072210	metanephric nephron development	339	6.51058e-11	6.55486e-07	1.93359e-09	2.60186	23.4447	61	0.00580316	0.015099	323	6.94842e-08	0.000699567	2.16584e-06	3.3815	5.91453	20	34	0.00524934	0.588235
GO:0071560	cellular response to transforming growth factor beta stimulus	349	1.19361e-10	1.20173e-06	3.44335e-09	1.9725	54.2457	107	0.0134272	0.0264851	324	7.34531e-08	0.000739526	2.28249e-06	2.38985	15.4822	37	89	0.00971129	0.41573
GO:0008406	gonad development	212	4.0425e-16	4.06999e-12	1.91981e-14	1.98383	84.6848	168	0.0209616	0.0415842	327	1.00232e-07	0.00100914	3.08605e-06	1.93772	30.9643	60	178	0.015748	0.337079
GO:0042063	gliogenesis	429	9.3113e-09	9.37461e-05	2.18522e-07	1.73904	70.1535	122	0.0173647	0.030198	328	1.08237e-07	0.00108972	3.32233e-06	2.10634	22.7883	48	131	0.0125984	0.366412
GO:0042476	odontogenesis	255	6.44523e-14	6.48905e-10	2.54473e-12	2.21839	49.5856	110	0.0122737	0.0272277	331	1.2646e-07	0.0012732	3.84652e-06	2.37871	15.1342	36	87	0.00944882	0.413793
GO:0030858	positive regulation of epithelial cell differentiation	202	1.27234e-16	1.28099e-12	6.34153e-15	3.25554	21.1946	69	0.00524619	0.0170792	333	1.44323e-07	0.00145304	4.36348e-06	3.17683	6.61036	21	38	0.00551181	0.552632
GO:0045927	positive regulation of growth	280	9.04657e-13	9.10808e-09	3.25289e-11	1.9825	65.5738	130	0.0162311	0.0321782	334	1.50908e-07	0.00151934	4.54892e-06	2.05306	24.3539	50	140	0.0131234	0.357143
GO:0030278	regulation of ossification	448	2.11819e-08	0.00021326	4.76026e-07	1.65545	82.7568	137	0.0204844	0.0339109	336	1.60689e-07	0.00161782	4.81493e-06	1.98988	27.1373	54	156	0.0141732	0.346154
GO:0042733	embryonic digit morphogenesis	454	2.67167e-08	0.000268984	5.92476e-07	2.10232	32.3453	68	0.00800625	0.0168317	337	1.73101e-07	0.00174278	5.17145e-06	2.723	9.91553	27	57	0.00708661	0.473684
GO:1901700	response to oxygen-containing compound	498	1.02294e-07	0.0010299	2.06807e-06	1.29555	311.836	404	0.0771872	0.1	339	2.05568e-07	0.00206966	6.10519e-06	1.39548	144.036	201	828	0.0527559	0.242754
GO:0072088	nephron epithelium morphogenesis	253	5.62654e-14	5.6648e-10	2.23905e-12	2.97198	21.8709	65	0.00541359	0.0160891	340	2.08451e-07	0.00209869	6.17261e-06	3.44913	5.2187	18	30	0.00472441	0.6
GO:0048566	embryonic digestive tract development	383	6.08872e-10	6.13012e-06	1.60055e-08	2.33769	28.6608	67	0.00709426	0.0165842	343	2.37633e-07	0.00239248	6.97517e-06	3.30978	5.74057	19	33	0.00498688	0.575758
GO:0001503	ossification	168	5.01844e-20	5.05257e-16	3.00748e-18	2.1575	80.6488	174	0.0199626	0.0430693	344	2.41813e-07	0.00243458	7.07726e-06	1.89513	31.6601	60	182	0.015748	0.32967
GO:0032330	regulation of chondrocyte differentiation	261	1.51797e-13	1.5283e-09	5.85554e-12	2.58541	30.5561	79	0.0075634	0.0195545	346	2.55041e-07	0.00256776	7.42126e-06	3.19364	6.26244	20	36	0.00524934	0.555556
GO:0043067	regulation of programmed cell death	425	5.77505e-09	5.81432e-05	1.36808e-07	1.28899	384.021	495	0.0950548	0.122525	347	2.59344e-07	0.00261107	7.5247e-06	1.35886	169.26	230	973	0.0603675	0.236382
GO:0001649	osteoblast differentiation	267	2.39313e-13	2.4094e-09	9.02398e-12	2.36381	38.9201	92	0.0096337	0.0227723	349	2.69504e-07	0.00271337	7.77469e-06	2.45272	13.0467	32	75	0.00839895	0.426667
GO:0009798	axis specification	381	5.58815e-10	5.62615e-06	1.47668e-08	2.1217	39.1195	83	0.00968304	0.0205446	349	2.69504e-07	0.00271337	7.77469e-06	2.45272	13.0467	32	75	0.00839895	0.426667
GO:0046661	male sex differentiation	181	2.06262e-18	2.07664e-14	1.14731e-16	2.28156	61.7999	141	0.015297	0.034901	352	2.80645e-07	0.00282554	8.0271e-06	2.10313	21.3967	45	123	0.011811	0.365854
GO:0040036	regulation of fibroblast growth factor receptor signaling pathway	422	4.85519e-09	4.8882e-05	1.15834e-07	2.59706	18.8675	49	0.00467017	0.0121287	353	2.83033e-07	0.00284957	8.07245e-06	3.67908	4.34892	16	25	0.00419948	0.64
GO:0002052	positive regulation of neuroblast proliferation	240	2.36345e-14	2.37952e-10	9.91466e-13	3.45786	15.6166	54	0.00386549	0.0133663	355	3.06847e-07	0.00308933	8.70235e-06	4.02399	3.47913	14	20	0.00367454	0.7
GO:0030510	regulation of BMP signaling pathway	480	4.4983e-08	0.000452889	9.43519e-07	1.92525	42.5919	82	0.0105425	0.020297	354	3.06813e-07	0.00308899	8.72596e-06	2.56474	11.3072	29	65	0.00761155	0.446154
GO:0042981	regulation of apoptotic process	428	8.04609e-09	8.10081e-05	1.89271e-07	1.2883	378.794	488	0.0937608	0.120792	356	3.29508e-07	0.00331749	9.31878e-06	1.35788	167.172	227	961	0.0595801	0.236212
GO:0046546	development of primary male sexual characteristics	197	3.15186e-17	3.17329e-13	1.61081e-15	2.24266	60.6422	136	0.0150104	0.0336634	357	3.35905e-07	0.00338189	9.47309e-06	2.13093	20.179	43	116	0.0112861	0.37069
GO:0009987	cellular process	77	1.10793e-43	1.11547e-39	1.44866e-41	1.12104	3015.07	3380	0.746304	0.836634	359	3.55921e-07	0.00358341	9.98164e-06	1.05848	2319.36	2455	13333	0.644357	0.18413
GO:0051153	regulation of striated muscle cell differentiation	451	2.32684e-08	0.000234266	5.19437e-07	1.90541	46.1842	88	0.0114317	0.0217822	361	3.88187e-07	0.00390827	1.08262e-05	2.42044	13.2207	32	76	0.00839895	0.421053
GO:0045168	cell-cell signaling involved in cell fate commitment	220	8.03698e-16	8.09163e-12	3.67802e-14	3.23211	20.4201	66	0.00505448	0.0163366	363	4.5062e-07	0.00453685	1.24982e-05	3.21243	5.91453	19	34	0.00498688	0.558824
GO:0072028	nephron morphogenesis	259	1.30365e-13	1.31251e-09	5.06762e-12	2.88712	22.8602	66	0.00565846	0.0163366	363	4.5062e-07	0.00453685	1.24982e-05	3.21243	5.91453	19	34	0.00498688	0.558824
GO:0007498	mesoderm development	223	1.11092e-15	1.11847e-11	5.01556e-14	2.3871	45.2432	108	0.0111988	0.0267327	369	5.28121e-07	0.00531712	1.44095e-05	2.23891	16.5259	37	95	0.00971129	0.389474
GO:0051147	regulation of muscle cell differentiation	226	1.30561e-15	1.31449e-11	5.81633e-14	2.22631	55.6975	124	0.0137865	0.0306931	369	5.28121e-07	0.00531712	1.44095e-05	2.23891	16.5259	37	95	0.00971129	0.389474
GO:0061180	mammary gland epithelium development	439	1.35598e-08	0.00013652	3.10979e-07	1.97252	42.0782	83	0.0104154	0.0205446	371	5.38652e-07	0.00542315	1.46177e-05	2.55491	10.9593	28	63	0.00734908	0.444444
GO:0001932	regulation of protein phosphorylation	483	5.34263e-08	0.000537896	1.11366e-06	1.32753	271.18	360	0.0671238	0.0891089	372	5.40908e-07	0.00544586	1.46394e-05	1.41292	123.857	175	712	0.0459318	0.245786
GO:0050794	regulation of cellular process	42	6.372e-50	6.41532e-46	1.52746e-47	1.19886	2308.02	2767	0.571292	0.684901	373	5.82616e-07	0.00586578	1.5726e-05	1.0857	1577.79	1713	9070	0.449606	0.188864
GO:0090100	positive regulation of transmembrane receptor protein serine/threonine kinase signaling pathway	334	4.72774e-11	4.75988e-07	1.42511e-09	2.25114	36.4261	82	0.00901636	0.020297	375	6.71759e-07	0.00676327	1.80354e-05	2.48818	11.6551	29	67	0.00761155	0.432836
GO:0060350	endochondral bone morphogenesis	473	3.90831e-08	0.000393488	8.319e-07	2.19738	27.3052	60	0.00675872	0.0148515	376	6.78369e-07	0.00682982	1.81644e-05	2.81312	8.17597	23	47	0.00603674	0.489362
GO:0044260	cellular macromolecule metabolic process	92	1.54805e-37	1.55857e-33	1.6941e-35	1.26276	1515.73	1914	0.375181	0.473762	385	8.87103e-07	0.00893136	2.31983e-05	1.12698	914.838	1031	5259	0.270604	0.196045
GO:0009953	dorsal/ventral pattern formation	279	8.60917e-13	8.66771e-09	3.10671e-11	2.21878	45.0698	100	0.0111559	0.0247525	386	8.90449e-07	0.00896504	2.32255e-05	2.22525	16.178	36	93	0.00944882	0.387097
GO:0060979	vasculogenesis involved in coronary vascular morphogenesis	354	1.76205e-10	1.77403e-06	5.01139e-09	3.36981	11.5733	39	0.00286469	0.00965346	389	9.44828e-07	0.00951253	2.44538e-05	4.51672	2.43539	11	14	0.00288714	0.785714
GO:0001837	epithelial to mesenchymal transition	268	2.42267e-13	2.43914e-09	9.10127e-12	2.76979	24.9116	69	0.00616623	0.0170792	395	1.20865e-06	0.0121687	3.08068e-05	2.8104	7.82805	22	45	0.00577428	0.488889
GO:0035282	segmentation	263	1.688e-13	1.69948e-09	6.46189e-12	2.2213	47.7197	106	0.0118118	0.0262376	398	1.37237e-06	0.013817	3.4716e-05	2.24656	15.1342	34	87	0.00892388	0.390805
GO:0031128	developmental induction	221	8.12277e-16	8.17801e-12	3.70046e-14	3.30355	19.3731	64	0.00479532	0.0158416	400	1.46596e-06	0.0147593	3.68983e-05	3.13558	5.74057	18	33	0.00472441	0.545454
GO:0061351	neural precursor cell proliferation	377	4.68878e-10	4.72066e-06	1.25217e-08	2.24308	32.9903	74	0.00816592	0.0183168	404	1.65883e-06	0.0167011	4.13393e-05	2.53326	10.2635	26	59	0.00682415	0.440678
GO:0060602	branch elongation of an epithelium	419	4.11098e-09	4.13893e-05	9.87812e-08	2.90608	14.1084	41	0.00349217	0.0101485	406	1.96128e-06	0.0197462	4.86359e-05	4.05781	2.95726	12	17	0.00314961	0.705882
GO:0002088	lens development in camera-type eye	206	1.96807e-16	1.98146e-12	9.61872e-15	2.61515	36.7092	96	0.00908642	0.0237624	409	2.04269e-06	0.0205658	5.02832e-05	2.46367	10.9593	27	63	0.00708661	0.428571
GO:0002089	lens morphogenesis in camera-type eye	277	4.75155e-13	4.78386e-09	1.72703e-11	3.0445	19.0508	58	0.00471554	0.0143564	413	2.20575e-06	0.0222075	5.37712e-05	3.44913	4.34892	15	25	0.00393701	0.6
GO:0060993	kidney morphogenesis	256	6.816e-14	6.86235e-10	2.68061e-12	2.43245	37.4108	91	0.00926009	0.0225247	418	2.65284e-06	0.0267087	6.38965e-05	2.64434	8.69784	23	50	0.00603674	0.46
GO:0002520	immune system development	241	2.44507e-14	2.4617e-10	1.02145e-12	1.58228	187.704	297	0.0464614	0.0735149	419	2.71487e-06	0.0273333	6.52347e-05	1.47614	83.3253	123	479	0.0322835	0.256785
GO:0048557	embryonic digestive tract morphogenesis	431	9.74667e-09	9.81294e-05	2.27678e-07	2.48444	20.5278	51	0.00508113	0.0126238	424	2.9893e-06	0.0300963	7.09818e-05	3.73656	3.47913	13	20	0.00341207	0.65
GO:0061035	regulation of cartilage development	305	1.20733e-11	1.21554e-07	3.98538e-10	2.27725	37.3256	85	0.00923902	0.0210396	425	3.04372e-06	0.0306442	7.21041e-05	2.69081	8.17597	22	47	0.00577428	0.468085
GO:0021515	cell differentiation in spinal cord	455	2.72133e-08	0.000273983	6.0216e-07	2.10127	32.3614	68	0.00801026	0.0168317	430	3.44089e-06	0.0346429	8.05648e-05	2.55491	9.39366	24	54	0.00629921	0.444444
GO:0065007	biological regulation	56	2.99571e-47	3.01608e-43	5.38585e-45	1.17846	2453.2	2891	0.607228	0.715594	432	3.5042e-06	0.0352803	8.16674e-05	1.07251	1740.79	1867	10007	0.490026	0.186569
GO:0051149	positive regulation of muscle cell differentiation	386	6.49145e-10	6.53559e-06	1.69316e-08	2.33388	28.7076	67	0.00710584	0.0165842	433	3.84602e-06	0.0387217	8.94267e-05	2.80417	7.13223	20	41	0.00524934	0.487805
GO:0048701	embryonic cranial skeleton morphogenesis	243	2.48201e-14	2.49888e-10	1.02835e-12	2.9395	23.1332	68	0.00572603	0.0168317	434	4.20875e-06	0.0423737	9.76352e-05	2.87428	6.61036	19	38	0.00498688	0.5
GO:0045661	regulation of myoblast differentiation	388	8.00554e-10	8.05998e-06	2.07731e-08	2.65619	19.5769	52	0.00484577	0.0128713	438	4.37282e-06	0.0440256	0.000100515	3.31648	4.52287	15	26	0.00393701	0.576923
GO:0050789	regulation of biological process	40	2.13848e-50	2.15302e-46	5.38256e-48	1.19198	2380.92	2838	0.589336	0.702475	439	4.52995e-06	0.0456075	0.00010389	1.07434	1671.72	1796	9610	0.471391	0.186889
GO:0009954	proximal/distal pattern formation	458	2.91958e-08	0.000293943	6.41797e-07	2.30939	23.8158	55	0.00589501	0.0136139	442	4.6591e-06	0.0469078	0.000106126	3.05392	5.56661	17	32	0.00446194	0.53125
GO:0060687	regulation of branching involved in prostate gland morphogenesis	369	3.76806e-10	3.79369e-06	1.0281e-08	4.78051	5.22957	25	0.00129445	0.00618812	444	4.79855e-06	0.0483118	0.00010881	5.74856	1.2177	7	7	0.00183727	1
GO:0048534	hematopoietic or lymphoid organ development	258	8.38561e-14	8.44264e-10	3.27234e-12	1.5809	180.91	286	0.0447796	0.0707921	445	4.90104e-06	0.0493436	0.000110885	1.47496	79.3243	117	456	0.0307087	0.256579
GO:0001892	embryonic placenta development	489	7.05392e-08	0.000710188	1.45233e-06	1.9304	40.9241	79	0.0101297	0.0195545	451	6.42467e-06	0.0646836	0.000143423	2.06948	17.3957	36	100	0.00944882	0.36
GO:0060425	lung morphogenesis	345	9.53621e-11	9.60106e-07	2.78292e-09	2.41167	28.6108	69	0.00708189	0.0170792	454	6.87014e-06	0.0691686	0.000152354	2.80058	6.78431	19	39	0.00498688	0.487179
GO:0048806	genitalia development	248	4.02553e-14	4.0529e-10	1.63423e-12	2.71608	27.9815	76	0.00692611	0.0188119	455	7.12987e-06	0.0717835	0.000157766	2.58099	8.52388	22	49	0.00577428	0.44898
GO:0060322	head development	398	1.23415e-09	1.24254e-05	3.12197e-08	2.3478	27.2596	64	0.00674742	0.0158416	458	7.46093e-06	0.0751166	0.00016401	2.46367	9.74158	24	56	0.00629921	0.428571
GO:0048641	regulation of skeletal muscle tissue development	474	3.92728e-08	0.000395398	8.34173e-07	2.04348	34.7446	71	0.00860016	0.0175743	458	7.46093e-06	0.0751166	0.00016401	2.46367	9.74158	24	56	0.00629921	0.428571
GO:0021761	limbic system development	368	3.43569e-10	3.45906e-06	9.39961e-09	2.09116	42.082	88	0.0104163	0.0217822	460	7.5145e-06	0.075656	0.000164469	2.25281	12.8728	29	74	0.00761155	0.391892
GO:0021871	forebrain regionalization	487	6.1609e-08	0.000620279	1.27367e-06	2.5574	16.814	43	0.00416187	0.0106436	462	7.701e-06	0.0775336	0.000167822	3.35332	4.17496	14	24	0.00367454	0.583333
GO:0001942	hair follicle development	291	4.33927e-12	4.36878e-08	1.5013e-10	2.32509	36.5577	85	0.00904895	0.0210396	464	8.20701e-06	0.0826281	0.000178078	2.21098	13.5686	30	78	0.00787402	0.384615
GO:1902105	regulation of leukocyte differentiation	364	3.00171e-10	3.02213e-06	8.30254e-09	1.791	74.8184	134	0.0185194	0.0331683	467	8.63071e-06	0.086894	0.000186068	1.73654	33.3997	58	192	0.0152231	0.302083
GO:0010634	positive regulation of epithelial cell migration	442	1.46953e-08	0.000147952	3.34734e-07	2.01743	38.663	78	0.00957005	0.0193069	469	8.87137e-06	0.089317	0.000190441	2.39523	10.4374	25	60	0.00656168	0.416667
GO:0010830	regulation of myotube differentiation	404	2.21224e-09	2.22728e-05	5.51308e-08	2.29425	28.3317	65	0.00701281	0.0160891	470	8.94058e-06	0.0900137	0.000191519	2.49466	9.21971	23	53	0.00603674	0.433962
GO:0090304	nucleic acid metabolic process	47	1.01696e-48	1.02388e-44	2.17846e-46	1.45157	894.892	1299	0.221508	0.321535	475	1.02725e-05	0.103423	0.000217733	1.15996	526.741	611	3028	0.160367	0.201783
GO:0042475	odontogenesis of dentin-containing tooth	323	3.06127e-11	3.08209e-07	9.54206e-10	2.24637	37.3936	84	0.00925584	0.0207921	481	1.15387e-05	0.116171	0.00024152	2.28252	11.8291	27	68	0.00708661	0.397059
GO:0042633	hair cycle	285	2.15725e-12	2.17192e-08	7.62078e-11	2.33085	37.3254	87	0.00923895	0.0215346	483	1.17589e-05	0.118388	0.00024511	2.14705	14.4384	31	83	0.00813648	0.373494
GO:0051726	regulation of cell cycle	379	4.99578e-10	5.02975e-06	1.32711e-08	1.42155	224.402	319	0.0555451	0.0789604	485	1.19054e-05	0.119864	0.000247142	1.40184	99.1553	139	570	0.0364829	0.24386
GO:0050954	sensory perception of mechanical stimulus	472	3.90409e-08	0.000393064	8.32763e-07	1.68466	73.6056	124	0.0182192	0.0306931	496	1.3558e-05	0.136502	0.000275206	1.91619	21.3967	41	123	0.0107612	0.333333
GO:0048742	regulation of skeletal muscle fiber development	436	1.12973e-08	0.000113741	2.60873e-07	2.35667	23.7623	56	0.00588176	0.0138614	492	1.34954e-05	0.135872	0.000276162	2.87428	5.91453	17	34	0.00446194	0.5
GO:0021846	cell proliferation in forebrain	409	2.9827e-09	3.00298e-05	7.34226e-08	2.57926	19.7731	51	0.00489433	0.0126238	500	1.49154e-05	0.150168	0.000300336	3.07958	4.87079	15	28	0.00393701	0.535714
GO:0046545	development of primary female sexual characteristics	327	3.43965e-11	3.46304e-07	1.05903e-09	2.01762	53.0329	107	0.013127	0.0264851	504	1.73983e-05	0.175166	0.000347552	2.012	17.3957	35	100	0.00918635	0.35
GO:0048332	mesoderm morphogenesis	300	9.41341e-12	9.47742e-08	3.15914e-10	2.54809	27.0791	69	0.00670275	0.0170792	506	1.75897e-05	0.177094	0.000349987	2.31797	10.7853	25	62	0.00656168	0.403226
GO:0009880	embryonic pattern specification	270	2.48205e-13	2.49893e-09	9.25529e-12	2.52483	32.0813	81	0.00794092	0.0200495	508	1.87132e-05	0.188404	0.000370874	2.40394	9.56762	23	55	0.00603674	0.418182
GO:0061005	cell differentiation involved in kidney development	453	2.60056e-08	0.000261825	5.77979e-07	2.25944	25.6701	58	0.00635398	0.0143564	519	2.19943e-05	0.221438	0.000426663	2.79216	6.08849	17	35	0.00446194	0.485714
GO:0019827	stem cell maintenance	147	5.66629e-23	5.70482e-19	3.88083e-21	2.67077	49.7983	133	0.0123263	0.0329208	521	2.2271e-05	0.224224	0.000430372	1.97093	18.2655	36	105	0.00944882	0.342857
GO:0021516	dorsal spinal cord development	272	3.09444e-13	3.11548e-09	1.1454e-11	4.39969	8.40968	37	0.0020816	0.00915842	523	2.37456e-05	0.239071	0.000457114	3.44913	3.47913	12	20	0.00314961	0.6
GO:0006807	nitrogen compound metabolic process	59	1.05295e-46	1.06011e-42	1.7968e-44	1.3558	1202.98	1631	0.297767	0.403713	524	2.4819e-05	0.249878	0.000476866	1.12395	737.577	829	4240	0.217585	0.195519
GO:0048639	positive regulation of developmental growth	303	1.04221e-11	1.0493e-07	3.46302e-10	2.70129	22.952	62	0.00568119	0.0153465	526	2.61433e-05	0.263211	0.000500401	2.60054	7.30618	19	42	0.00498688	0.452381
GO:0043588	skin development	389	8.3521e-10	8.40889e-06	2.16167e-08	1.62466	108.331	176	0.0268145	0.0435644	529	2.75798e-05	0.277674	0.000524903	1.57761	46.2725	73	266	0.0191601	0.274436
GO:0008544	epidermis development	355	1.7802e-10	1.79231e-06	5.04876e-09	1.71689	91.4442	157	0.0226347	0.0388614	531	2.78048e-05	0.279939	0.000527192	1.62459	40.01	65	230	0.0170604	0.282609
GO:0006139	nucleobase-containing compound metabolic process	38	1.63796e-50	1.6491e-46	4.33973e-48	1.41069	1050.55	1482	0.260038	0.366832	535	3.1393e-05	0.316065	0.000590775	1.13374	638.595	724	3671	0.190026	0.197221
GO:0044237	cellular metabolic process	96	3.83848e-36	3.86458e-32	4.0256e-34	1.21133	1879.75	2277	0.465284	0.563614	536	3.16388e-05	0.318539	0.000594289	1.0859	1234.92	1341	7099	0.351969	0.1889
GO:1901360	organic cyclic compound metabolic process	49	1.47615e-48	1.48619e-44	3.03304e-46	1.37945	1135.96	1567	0.281179	0.387871	537	3.18324e-05	0.320489	0.000596813	1.12649	697.74	786	4011	0.206299	0.195961
GO:0021514	ventral spinal cord interneuron differentiation	459	2.95861e-08	0.000297873	6.48961e-07	3.09922	10.6478	33	0.0026356	0.00816832	538	3.20681e-05	0.322862	0.000600115	3.83237	2.60935	10	15	0.00262467	0.666667
GO:0001704	formation of primary germ layer	265	1.96065e-13	1.97399e-09	7.449e-12	2.39914	37.5134	90	0.0092855	0.0222772	541	3.24388e-05	0.326594	0.000603686	2.11023	13.7426	29	79	0.00761155	0.367089
GO:0008584	male gonad development	434	1.07105e-08	0.000107834	2.48465e-07	1.90025	48.941	93	0.0121141	0.0230198	544	3.57345e-05	0.359775	0.000661351	1.97425	17.2217	34	99	0.00892388	0.343434
GO:0048286	lung alveolus development	298	6.0428e-12	6.08389e-08	2.04157e-10	2.53427	28.0159	71	0.00693464	0.0175743	548	3.92305e-05	0.394973	0.000720753	2.54006	7.48014	19	43	0.00498688	0.44186
GO:0007369	gastrulation	274	3.29069e-13	3.31307e-09	1.20915e-11	2.06577	59.0578	122	0.0146183	0.030198	549	4.03365e-05	0.406108	0.000739724	1.85437	21.5706	40	124	0.0104987	0.322581
GO:0006725	cellular aromatic compound metabolic process	50	2.05214e-48	2.0661e-44	4.13219e-46	1.38946	1094.67	1521	0.270958	0.376485	554	4.49852e-05	0.452911	0.000817529	1.12749	666.08	751	3829	0.197113	0.196135
GO:0001558	regulation of cell growth	324	3.16664e-11	3.18817e-07	9.84003e-10	1.73266	95.2295	165	0.0235717	0.0408416	557	4.60862e-05	0.463996	0.000833027	1.59414	41.4017	66	238	0.0173228	0.277311
GO:0003401	axis elongation	353	1.46332e-10	1.47327e-06	4.17357e-09	2.89933	16.9005	49	0.00418329	0.0121287	562	4.66431e-05	0.469602	0.000835592	2.98073	4.69683	14	27	0.00367454	0.518518
GO:0061326	renal tubule development	499	1.0315e-07	0.00103851	2.08118e-06	2.13428	28.1126	60	0.00695856	0.0148515	558	4.63556e-05	0.466709	0.000836395	2.58685	6.95827	18	40	0.00472441	0.45
GO:0072273	metanephric nephron morphogenesis	328	3.70331e-11	3.72849e-07	1.13674e-09	3.36692	12.4743	42	0.0030877	0.010396	559	4.66172e-05	0.469342	0.000839609	3.28489	3.65309	12	21	0.00314961	0.571429
GO:0060441	epithelial tube branching involved in lung morphogenesis	320	2.74455e-11	2.76321e-07	8.63503e-10	2.89739	18.2923	53	0.0045278	0.0131188	564	4.79996e-05	0.48326	0.000856843	3.1138	4.17496	13	24	0.00341207	0.541667
GO:0001707	mesoderm formation	440	1.41859e-08	0.000142823	3.24599e-07	2.32022	24.5666	57	0.00608085	0.0141089	569	5.16085e-05	0.519594	0.000913171	2.2796	10.0895	23	58	0.00603674	0.396552
GO:0060041	retina development in camera-type eye	141	1.38455e-23	1.39396e-19	9.88625e-22	2.59258	55.5431	144	0.0137483	0.0356436	573	5.25754e-05	0.529329	0.000923785	1.86705	20.3529	38	117	0.00997375	0.324786
GO:0030097	hemopoiesis	396	1.20112e-09	1.20929e-05	3.05376e-08	1.49799	159.547	239	0.0394919	0.0591584	580	5.9134e-05	0.595361	0.00102648	1.43714	70.9743	102	408	0.0267717	0.25
GO:0043589	skin morphogenesis	366	3.2401e-10	3.26214e-06	8.91294e-09	2.66928	20.2302	54	0.00500748	0.0133663	588	6.92546e-05	0.697255	0.00118581	2.52376	7.13223	18	41	0.00472441	0.439024
GO:0050772	positive regulation of axonogenesis	493	8.35663e-08	0.000841345	1.70658e-06	2.21552	25.2762	56	0.00625649	0.0138614	588	6.92546e-05	0.697255	0.00118581	2.52376	7.13223	18	41	0.00472441	0.439024
GO:0046660	female sex differentiation	347	1.18028e-10	1.18831e-06	3.42452e-09	1.97291	54.2345	107	0.0134244	0.0264851	590	6.98948e-05	0.7037	0.00119271	1.89811	18.4394	35	106	0.00918635	0.330189
GO:0035019	somatic stem cell maintenance	185	3.14488e-18	3.16627e-14	1.7115e-16	3.12338	25.9334	81	0.00641917	0.0200495	599	8.38628e-05	0.84433	0.00140957	2.42717	7.82805	19	45	0.00498688	0.422222
GO:1902107	positive regulation of leukocyte differentiation	416	3.88654e-09	3.91297e-05	9.40617e-08	1.95043	47.169	92	0.0116755	0.0227723	602	8.44244e-05	0.849985	0.00141194	1.8644	19.3092	36	111	0.00944882	0.324324
GO:0034641	cellular nitrogen compound metabolic process	55	2.96824e-47	2.98842e-43	5.43349e-45	1.38288	1100.6	1522	0.272426	0.376733	605	8.73373e-05	0.879312	0.00145341	1.12059	679.997	762	3909	0.2	0.194935
GO:0043170	macromolecule metabolic process	114	1.57377e-31	1.58447e-27	1.38989e-29	1.22245	1648.33	2015	0.408002	0.498762	609	9.43725e-05	0.950143	0.00156017	1.09153	1027.91	1122	5909	0.294488	0.18988
GO:0048709	oligodendrocyte differentiation	445	1.77122e-08	0.000178327	4.00734e-07	2.21521	27.9883	62	0.00692781	0.0153465	611	9.74404e-05	0.981029	0.00160561	2.34635	8.52388	20	49	0.00524934	0.408163
GO:0008589	regulation of smoothened signaling pathway	356	1.78903e-10	1.8012e-06	5.05954e-09	2.32534	30.9632	72	0.00766417	0.0178218	612	0.000109605	1	0.00180311	2.27773	9.21971	21	53	0.00551181	0.396226
GO:0072079	nephron tubule formation	371	3.87894e-10	3.90532e-06	1.05265e-08	3.27531	11.9073	39	0.00294735	0.00965346	620	0.00012434	1	0.00201912	3.6955	2.43539	9	14	0.00236221	0.642857
GO:0031069	hair follicle morphogenesis	382	5.89598e-10	5.93607e-06	1.55395e-08	2.88805	15.9277	46	0.0039425	0.0113861	623	0.000127318	1	0.00205752	2.77516	5.04474	14	29	0.00367454	0.482759
GO:0046483	heterocycle metabolic process	48	1.20108e-48	1.20925e-44	2.51927e-46	1.39387	1081.88	1508	0.267792	0.373267	626	0.000137932	1	0.00221837	1.11887	661.383	740	3802	0.194226	0.194634
GO:0035162	embryonic hemopoiesis	446	1.90501e-08	0.000191796	4.30036e-07	2.67007	16.1044	43	0.00398625	0.0106436	628	0.000141422	1	0.00226725	2.87428	4.52287	13	26	0.00341207	0.5
GO:0060740	prostate gland epithelium morphogenesis	485	5.73473e-08	0.000577373	1.19046e-06	2.34499	21.7485	51	0.0053833	0.0126238	628	0.000141422	1	0.00226725	2.87428	4.52287	13	26	0.00341207	0.5
GO:0001829	trophectodermal cell differentiation	417	3.88999e-09	3.91644e-05	9.39195e-08	3.54582	8.74269	31	0.00216403	0.00767327	637	0.000151917	1	0.0024011	2.99925	4.001	12	23	0.00314961	0.521739
GO:0060501	positive regulation of epithelial cell proliferation involved in lung morphogenesis	456	2.77276e-08	0.000279161	6.12195e-07	4.69052	4.26392	20	0.00105543	0.0049505	642	0.000158951	1	0.00249271	5.74856	0.869784	5	5	0.00131234	1
GO:0007442	hindgut morphogenesis	465	3.50723e-08	0.000353108	7.59373e-07	3.21212	9.65094	31	0.00238885	0.00767327	647	0.000164553	1	0.00256062	4.92733	1.2177	6	7	0.0015748	0.857143
GO:0044238	primary metabolic process	106	1.96491e-33	1.97827e-29	1.86629e-31	1.19814	1923.82	2305	0.476193	0.570545	657	0.000195901	1	0.00300203	1.07396	1283.11	1378	7376	0.36168	0.186822
GO:0060512	prostate gland morphogenesis	491	7.49471e-08	0.000754568	1.5368e-06	2.32416	21.9434	51	0.00543154	0.0126238	663	0.00022943	1	0.00348402	2.76782	4.69683	13	27	0.00341207	0.481482
GO:0048730	epidermis morphogenesis	384	6.37484e-10	6.41819e-06	1.6714e-08	2.73698	18.2683	50	0.00452186	0.0123762	672	0.000258945	1	0.00387954	2.53613	5.91453	15	34	0.00393701	0.441177
GO:0007492	endoderm development	346	1.14687e-10	1.15467e-06	3.3372e-09	2.36643	30.003	71	0.00742648	0.0175743	675	0.000272615	1	0.0040662	2.15571	9.74158	21	56	0.00551181	0.375
GO:0045637	regulation of myeloid cell differentiation	397	1.20397e-09	1.21216e-05	3.05329e-08	1.83035	63.9221	117	0.0158223	0.0289604	686	0.000314921	1	0.0046219	1.64768	27.3112	45	157	0.011811	0.286624
GO:0008585	female gonad development	395	1.1548e-09	1.16265e-05	2.94341e-08	2.12071	37.7231	80	0.00933741	0.019802	699	0.000379119	1	0.00546062	1.91619	14.0905	27	81	0.00708661	0.333333
GO:0045662	negative regulation of myoblast differentiation	317	2.29334e-11	2.30893e-07	7.2837e-10	3.6217	10.7684	39	0.00266545	0.00965346	717	0.000465828	1	0.00654108	3.53757	2.26144	8	13	0.00209974	0.615385
GO:0032332	positive regulation of chondrocyte differentiation	315	1.6863e-11	1.69777e-07	5.38975e-10	3.33824	13.1806	44	0.00326253	0.0108911	732	0.000507827	1	0.0069847	3.23356	2.78331	9	16	0.00236221	0.5625
GO:0002682	regulation of immune system process	360	2.37e-10	2.38612e-06	6.62811e-09	1.40632	248.166	349	0.0614273	0.0863861	739	0.000556664	1	0.00758389	1.26026	135.686	171	780	0.0448819	0.219231
GO:0071704	organic substance metabolic process	115	3.29294e-31	3.31534e-27	2.8829e-29	1.18589	1975.73	2343	0.489043	0.579951	746	0.000591825	1	0.00798726	1.06609	1322.59	1410	7603	0.370079	0.185453
GO:0030307	positive regulation of cell growth	321	2.78279e-11	2.80172e-07	8.72809e-10	2.33259	33.4392	78	0.00827703	0.0193069	747	0.000601445	1	0.00810622	1.89193	13.7426	26	79	0.00682415	0.329114
GO:0051148	negative regulation of muscle cell differentiation	406	2.73211e-09	2.75069e-05	6.77509e-08	2.53199	20.9321	53	0.00518122	0.0131188	756	0.00067161	1	0.00894413	2.43878	5.74057	14	33	0.00367454	0.424242
GO:0061387	regulation of extent of cell growth	385	6.43114e-10	6.47487e-06	1.68178e-08	2.40778	26.1651	63	0.00647652	0.0155941	762	0.000730671	1	0.00965406	2.15571	8.34992	18	48	0.00472441	0.375
GO:2000095	regulation of Wnt receptor signaling pathway, planar cell polarity pathway	438	1.31118e-08	0.00013201	3.01392e-07	3.85691	6.74115	26	0.0016686	0.00643564	782	0.000821451	1	0.0105759	3.65817	1.91352	7	11	0.00183727	0.636364
GO:0048852	diencephalon morphogenesis	269	2.43322e-13	2.44977e-09	9.10694e-12	4.96139	6.65136	33	0.00164638	0.00816832	774	0.000815604	1	0.0106092	4.79046	1.04374	5	6	0.00131234	0.833333
GO:0032526	response to retinoic acid	399	1.23638e-09	1.24479e-05	3.11977e-08	2.09514	39.1381	82	0.00968766	0.020297	805	0.000918694	1	0.01149	1.84522	14.0905	26	81	0.00682415	0.320988
GO:2000050	regulation of non-canonical Wnt receptor signaling pathway	452	2.51197e-08	0.000252905	5.59525e-07	3.61927	7.46007	27	0.00184655	0.00668317	806	0.000921146	1	0.0115063	3.28489	2.43539	8	14	0.00209974	0.571429
GO:0060737	prostate gland morphogenetic growth	333	4.3272e-11	4.35663e-07	1.3083e-09	4.90809	5.50112	27	0.00136166	0.00668317	797	0.000914534	1	0.0115527	5.74856	0.695827	4	4	0.00104987	1
GO:0072078	nephron tubule morphogenesis	463	3.21876e-08	0.000324065	6.99923e-07	2.69242	15.2279	41	0.00376929	0.0101485	841	0.00136311	1	0.0163185	2.73741	3.65309	10	21	0.00262467	0.476191
GO:0043586	tongue development	222	1.09483e-15	1.10228e-11	4.96521e-14	3.79519	13.965	53	0.00345669	0.0131188	854	0.00154505	1	0.0182149	2.87428	3.13122	9	18	0.00236221	0.5
GO:0043584	nose development	211	3.61147e-16	3.63603e-12	1.72323e-14	5.69072	6.32609	36	0.00156586	0.00891089	872	0.00167537	1	0.0193436	3.35332	2.08748	7	12	0.00183727	0.583333
GO:0097150	neuronal stem cell maintenance	293	4.96807e-12	5.00185e-08	1.70712e-10	3.90208	9.73839	38	0.00241049	0.00940594	872	0.00167537	1	0.0193436	3.35332	2.08748	7	12	0.00183727	0.583333
GO:0072189	ureter development	336	5.18451e-11	5.21976e-07	1.5535e-09	3.45225	11.5867	40	0.00286798	0.00990099	872	0.00167537	1	0.0193436	3.35332	2.08748	7	12	0.00183727	0.583333
GO:0051150	regulation of smooth muscle cell differentiation	287	3.15392e-12	3.17537e-08	1.1064e-10	3.6503	11.5059	42	0.002848	0.010396	868	0.0016736	1	0.0194122	3.0659	2.60935	8	15	0.00209974	0.533333
GO:0021984	adenohypophysis development	299	7.49611e-12	7.54708e-08	2.52411e-10	4.12757	8.47956	35	0.0020989	0.00866337	868	0.0016736	1	0.0194122	3.0659	2.60935	8	15	0.00209974	0.533333
GO:0030539	male genitalia development	361	2.63434e-10	2.65225e-06	7.34695e-09	2.96439	15.5175	46	0.00384098	0.0113861	904	0.00211224	1	0.0235243	2.61298	3.82705	10	22	0.00262467	0.454545
GO:0007050	cell cycle arrest	352	1.45475e-10	1.46464e-06	4.1609e-09	2.20949	36.66	81	0.00907426	0.0200495	915	0.00240737	1	0.026489	1.73794	14.9603	26	86	0.00682415	0.302326
GO:0045773	positive regulation of axon extension	281	9.22161e-13	9.28432e-09	3.30403e-11	3.65687	12.0321	44	0.00297825	0.0108911	936	0.00248533	1	0.0267333	2.723	3.30518	9	19	0.00236221	0.473684
GO:0060235	lens induction in camera-type eye	224	1.21728e-15	1.22556e-11	5.47124e-14	6.25134	5.1189	32	0.00126706	0.00792079	918	0.00244323	1	0.0267957	4.10611	1.2177	5	7	0.00131234	0.714286
GO:0030513	positive regulation of BMP signaling pathway	462	3.10699e-08	0.000312812	6.77082e-07	2.73571	14.6214	40	0.00361916	0.00990099	945	0.00257813	1	0.0274673	2.43208	4.52287	11	26	0.00288714	0.423077
GO:0030516	regulation of axon extension	312	1.50687e-11	1.51711e-07	4.86255e-10	2.75605	21.4074	59	0.00529887	0.014604	986	0.0033498	1	0.0342047	2.11789	6.61036	14	38	0.00367454	0.368421
GO:0008152	metabolic process	125	7.32462e-28	7.37443e-24	5.89954e-26	1.16426	2096.62	2441	0.518965	0.604208	1035	0.0044503	1	0.0432905	1.04958	1450.1	1522	8336	0.399475	0.182582
GO:0060795	cell fate commitment involved in formation of primary germ layer	316	1.97477e-11	1.9882e-07	6.29177e-10	3.5014	11.7096	41	0.00289841	0.0101485	1045	0.00458191	1	0.0441442	2.39523	4.17496	10	24	0.00262467	0.416667
GO:0021527	spinal cord association neuron differentiation	495	9.52296e-08	0.000958772	1.93691e-06	3.70588	6.4762	24	0.00160302	0.00594059	1059	0.00525187	1	0.04993	2.87428	2.43539	7	14	0.00183727	0.5
GO:0000578	embryonic axis specification	478	4.20667e-08	0.000423528	8.86041e-07	2.52942	17.7907	45	0.00440363	0.0111386	1085	0.00545398	1	0.0506089	2.15571	5.56661	12	32	0.00314961	0.375
GO:0045619	regulation of lymphocyte differentiation	475	3.99092e-08	0.000401806	8.45908e-07	1.95827	40.3416	79	0.00998555	0.0195545	1163	0.00841796	1	0.0728736	1.53979	19.4831	30	112	0.00787402	0.267857
GO:0060042	retina morphogenesis in camera-type eye	194	2.37579e-17	2.39195e-13	1.23296e-15	2.91824	29.1271	85	0.00720968	0.0210396	1176	0.00923314	1	0.079047	1.91619	7.30618	14	42	0.00367454	0.333333
GO:0001714	endodermal cell fate specification	203	1.32323e-16	1.33223e-12	6.5627e-15	7.37148	4.06974	30	0.00100736	0.00742574	1199	0.0101794	1	0.0854762	3.83237	1.04374	4	6	0.00104987	0.666667
GO:0021937	cerebellar Purkinje cell-granule cell precursor cell signaling involved in regulation of granule cell precursor cell proliferation	393	1.0672e-09	1.07446e-05	2.73399e-08	5.42114	3.87372	21	0.000958843	0.00519802	1199	0.0101794	1	0.0854762	3.83237	1.04374	4	6	0.00104987	0.666667
GO:0001706	endoderm formation	234	6.26675e-15	6.30936e-11	2.69631e-13	3.63002	14.6005	53	0.00361398	0.0131188	1260	0.0119572	1	0.0955437	2.12909	4.69683	10	27	0.00262467	0.37037
GO:0006366	transcription from RNA polymerase II promoter	314	1.61515e-11	1.62613e-07	5.17876e-10	1.81624	80.9367	147	0.0200338	0.0363861	1271	0.0124614	1	0.0987105	1.38334	32.5299	45	187	0.011811	0.240642
GO:0070306	lens fiber cell differentiation	447	1.96136e-08	0.000197469	4.41766e-07	3.09122	10.9989	34	0.0027225	0.00841584	1285	0.0144644	1	0.113329	2.29942	3.47913	8	20	0.00209974	0.4
GO:0046637	regulation of alpha-beta T cell differentiation	464	3.45616e-08	0.000347966	7.49927e-07	2.51689	18.2765	46	0.00452389	0.0113861	1293	0.014896	1	0.115988	1.86828	6.95827	13	40	0.00341207	0.325
GO:0008219	cell death	433	1.00834e-08	0.000101519	2.34456e-07	1.3295	296.352	394	0.0733545	0.0975247	1299	0.0151559	1	0.117467	1.16461	147.689	172	849	0.0451444	0.202591
GO:0016265	death	430	9.31915e-09	9.38252e-05	2.18198e-07	1.32881	298.763	397	0.0739513	0.0982673	1329	0.0155774	1	0.118009	1.16316	148.733	173	855	0.0454068	0.202339
GO:0002376	immune system process	407	2.74268e-09	2.76133e-05	6.78459e-08	1.31282	348.105	457	0.0861647	0.113119	1348	0.0175349	1	0.130965	1.13331	207.356	235	1192	0.0616798	0.197148
GO:0071600	otic vesicle morphogenesis	348	1.18307e-10	1.19111e-06	3.42274e-09	4.24297	7.07051	30	0.00175013	0.00742574	1409	0.0184768	1	0.132026	2.87428	1.73957	5	10	0.00131234	0.5
GO:0070307	lens fiber cell development	484	5.53685e-08	0.00055745	1.15176e-06	4.11516	5.34608	22	0.00132329	0.00544555	1409	0.0184768	1	0.132026	2.87428	1.73957	5	10	0.00131234	0.5
GO:0021940	positive regulation of cerebellar granule cell precursor proliferation	488	6.86336e-08	0.000691003	1.41599e-06	4.06331	5.41431	22	0.00134018	0.00544555	1409	0.0184768	1	0.132026	2.87428	1.73957	5	10	0.00131234	0.5
GO:2000739	regulation of mesenchymal stem cell differentiation	387	7.54679e-10	7.5981e-06	1.96333e-08	4.61698	5.41479	25	0.0013403	0.00618812	1356	0.0182991	1	0.135867	4.31142	0.695827	3	4	0.000787402	0.75
GO:0060527	prostate epithelial cord arborization involved in prostate glandular acinus morphogenesis	461	3.10402e-08	0.000312513	6.77902e-07	4.44455	4.72488	21	0.00116953	0.00519802	1452	0.0204942	1	0.142105	3.28489	1.2177	4	7	0.00104987	0.571429
GO:0060788	ectodermal placode formation	427	7.7865e-09	7.83945e-05	1.83594e-07	2.88318	13.8735	40	0.00343405	0.00990099	1498	0.0232674	1	0.156379	2.46367	2.43539	6	14	0.0015748	0.428571
GO:0012501	programmed cell death	390	8.92504e-10	8.98573e-06	2.30403e-08	1.36821	277.003	379	0.0685652	0.0938119	1589	0.0297577	1	0.188547	1.14827	138.47	159	796	0.0417323	0.199749
GO:0071866	negative regulation of apoptotic process in bone marrow	362	2.80423e-10	2.8233e-06	7.79918e-09	7.62304	2.23008	17	0.000552	0.00420792	1591	0.0302544	1	0.191453	5.74856	0.347913	2	2	0.000524934	1
GO:2000741	positive regulation of mesenchymal stem cell differentiation	410	3.0821e-09	3.10305e-05	7.56843e-08	4.86011	4.52665	22	0.00112046	0.00544555	1591	0.0302544	1	0.191453	5.74856	0.347913	2	2	0.000524934	1
GO:0050973	detection of mechanical stimulus involved in equilibrioception	415	3.83364e-09	3.85971e-05	9.30051e-08	4.41339	5.438	24	0.00134604	0.00594059	1591	0.0302544	1	0.191453	5.74856	0.347913	2	2	0.000524934	1
GO:0035607	fibroblast growth factor receptor signaling pathway involved in orbitofrontal cortex development	460	3.02041e-08	0.000304094	6.61075e-07	6.97312	2.00771	14	0.000496958	0.00346535	1591	0.0302544	1	0.191453	5.74856	0.347913	2	2	0.000524934	1
GO:0071599	otic vesicle development	441	1.43451e-08	0.000144427	3.27498e-07	3.1983	10.318	33	0.00255396	0.00816832	1694	0.0331904	1	0.197262	2.29942	2.60935	6	15	0.0015748	0.4
GO:0045582	positive regulation of T cell differentiation	497	1.00127e-07	0.00100808	2.02832e-06	2.24009	24.1062	54	0.00596687	0.0133663	1762	0.0356621	1	0.203772	1.58581	10.0895	16	58	0.00419948	0.275862
GO:0003407	neural retina development	344	7.48268e-11	7.53356e-07	2.18999e-09	2.66808	21.7384	58	0.0053808	0.0143564	1771	0.0376623	1	0.214107	1.7565	6.26244	11	36	0.00288714	0.305556
GO:0021587	cerebellum morphogenesis	494	8.85234e-08	0.000891253	1.80416e-06	2.49195	17.6569	44	0.00437051	0.0108911	1771	0.0376623	1	0.214107	1.7565	6.26244	11	36	0.00288714	0.305556
GO:0051152	positive regulation of smooth muscle cell differentiation	450	2.1399e-08	0.000215445	4.78768e-07	3.88593	6.43347	25	0.00159244	0.00618812	1779	0.0398424	1	0.225483	3.44913	0.869784	3	5	0.000787402	0.6
GO:0032713	negative regulation of interleukin-4 production	479	4.37313e-08	0.000440287	9.1918e-07	5.38291	3.15815	17	0.000781719	0.00420792	1779	0.0398424	1	0.225483	3.44913	0.869784	3	5	0.000787402	0.6
GO:0006915	apoptotic process	432	1.00746e-08	0.000101431	2.34794e-07	1.34725	270.179	364	0.0668761	0.090099	1831	0.0417784	1	0.229724	1.13789	135.338	154	778	0.04042	0.197943
GO:0035987	endodermal cell differentiation	292	4.51387e-12	4.54456e-08	1.55636e-10	4.20599	8.32147	35	0.00205977	0.00866337	1868	0.045488	1	0.245168	2.15571	2.78331	6	16	0.0015748	0.375
GO:0048853	forebrain morphogenesis	375	4.31324e-10	4.34257e-06	1.15802e-08	3.61752	9.39871	34	0.00232641	0.00841584	1868	0.045488	1	0.245168	2.15571	2.78331	6	16	0.0015748	0.375
GO:0060216	definitive hemopoiesis	477	4.12531e-08	0.000415336	8.70726e-07	3.75265	6.66196	25	0.001649	0.00618812	1868	0.045488	1	0.245168	2.15571	2.78331	6	16	0.0015748	0.375
GO:0030432	peristalsis	367	3.28476e-10	3.30709e-06	9.01115e-09	4.46679	6.0446	27	0.00149619	0.00668317	1919	0.0551206	1	0.289189	2.55491	1.56561	4	9	0.00104987	0.444444
GO:0001711	endodermal cell fate commitment	308	1.25693e-11	1.26548e-07	4.1087e-10	4.38846	7.29185	32	0.00180491	0.00792079	1964	0.0599627	1	0.307385	2.21098	2.26144	5	13	0.00131234	0.384615
GO:0003413	chondrocyte differentiation involved in endochondral bone morphogenesis	496	9.75276e-08	0.000981908	1.97965e-06	4.33246	4.61631	20	0.00114265	0.0049505	2030	0.0695054	1	0.34472	2.87428	1.04374	3	6	0.000787402	0.5
GO:0043576	regulation of respiratory gaseous exchange	500	1.04341e-07	0.0010505	2.101e-06	2.82405	12.3936	35	0.00306771	0.00866337	2088	0.07331	1	0.353489	1.82909	3.82705	7	22	0.00183727	0.318182
GO:0030910	olfactory placode formation	229	3.12561e-15	3.14687e-11	1.37418e-13	8.30522	3.01016	25	0.000745088	0.00618812	2149	0.0802418	1	0.37593	3.83237	0.52187	2	3	0.000524934	0.666667
GO:0072193	ureter smooth muscle cell differentiation	380	5.25848e-10	5.29424e-06	1.39322e-08	5.64589	3.71952	21	0.000920673	0.00519802	2149	0.0802418	1	0.37593	3.83237	0.52187	2	3	0.000524934	0.666667
GO:0072194	kidney smooth muscle tissue development	492	7.72822e-08	0.000778077	1.58146e-06	4.20459	4.99454	21	0.00123627	0.00519802	2149	0.0802418	1	0.37593	3.83237	0.52187	2	3	0.000524934	0.666667
GO:0007154	cell communication	260	1.387e-13	1.39644e-09	5.37091e-12	1.16357	1360.47	1583	0.33675	0.391832	2489	0.113557	1	0.459336	1.03398	843.342	872	4848	0.228871	0.179868
GO:0044700	single organism signaling	273	3.11033e-13	3.13148e-09	1.14706e-11	1.16406	1328.97	1547	0.328952	0.382921	2533	0.130422	1	0.518395	1.03223	820.554	847	4717	0.22231	0.179563
GO:0044065	regulation of respiratory system process	471	3.61766e-08	0.000364226	7.73303e-07	3.20756	9.66467	31	0.00239224	0.00767327	2534	0.130492	1	0.518466	1.79642	2.78331	5	16	0.00131234	0.3125
GO:0002087	regulation of respiratory gaseous exchange by neurological system process	443	1.56395e-08	0.000157459	3.55437e-07	3.41427	8.78664	30	0.00217491	0.00742574	3341	0.177208	1	0.53401	1.76879	2.26144	4	13	0.00104987	0.307692
GO:0050896	response to stimulus	182	2.14209e-18	2.15666e-14	1.18498e-16	1.15444	1781.82	2057	0.441044	0.509158	2555	0.13607	1	0.536185	1.02435	1194.91	1224	6869	0.32126	0.178192
GO:0030916	otic vesicle formation	372	3.88615e-10	3.91258e-06	1.05177e-08	4.77316	5.23763	25	0.00129644	0.00618812	2740	0.148778	1	0.546676	2.15571	1.39165	3	8	0.000787402	0.375
GO:0030852	regulation of granulocyte differentiation	414	3.75574e-09	3.78128e-05	9.13353e-08	4.41819	5.43209	24	0.00134458	0.00594059	2824	0.159752	1	0.569543	1.69075	2.95726	5	17	0.00131234	0.294118
GO:0072105	ureteric peristalsis	331	4.07907e-11	4.10681e-07	1.24073e-09	6.93425	2.88423	20	0.000713919	0.0049505	2864	0.173957	1	0.611521	5.74856	0.173957	1	1	0.000262467	1
GO:0072195	kidney smooth muscle cell differentiation	331	4.07907e-11	4.10681e-07	1.24073e-09	6.93425	2.88423	20	0.000713919	0.0049505	2864	0.173957	1	0.611521	5.74856	0.173957	1	1	0.000262467	1
GO:0097062	dendritic spine maintenance	444	1.7054e-08	0.0001717	3.86711e-07	14.8964	0.604171	9	0.000149547	0.00222772	2864	0.173957	1	0.611521	5.74856	0.173957	1	1	0.000262467	1
GO:0060365	coronal suture morphogenesis	466	3.54958e-08	0.000357372	7.66892e-07	8.49537	1.41253	12	0.000349637	0.0029703	2864	0.173957	1	0.611521	5.74856	0.173957	1	1	0.000262467	1
GO:0035604	fibroblast growth factor receptor signaling pathway involved in positive regulation of cell proliferation in bone marrow	466	3.54958e-08	0.000357372	7.66892e-07	8.49537	1.41253	12	0.000349637	0.0029703	2864	0.173957	1	0.611521	5.74856	0.173957	1	1	0.000262467	1
GO:0035603	fibroblast growth factor receptor signaling pathway involved in hemopoiesis	466	3.54958e-08	0.000357372	7.66892e-07	8.49537	1.41253	12	0.000349637	0.0029703	2864	0.173957	1	0.611521	5.74856	0.173957	1	1	0.000262467	1
GO:0035602	fibroblast growth factor receptor signaling pathway involved in negative regulation of apoptotic process in bone marrow	466	3.54958e-08	0.000357372	7.66892e-07	8.49537	1.41253	12	0.000349637	0.0029703	2864	0.173957	1	0.611521	5.74856	0.173957	1	1	0.000262467	1
GO:0051716	cellular response to stimulus	286	2.298e-12	2.31362e-08	8.08959e-11	1.14898	1428.23	1641	0.353522	0.406188	3634	0.224119	1	0.620922	1.02013	932.234	951	5359	0.249606	0.177458
GO:2000116	regulation of cysteine-type endopeptidase activity	457	2.82533e-08	0.000284454	6.22438e-07	1.75843	62.5558	110	0.0154841	0.0272277	3791	0.258369	1	0.686168	1.12788	27.4852	31	158	0.00813648	0.196203
GO:0050975	sensory perception of touch	337	5.59161e-11	5.62963e-07	1.67051e-09	6.80868	2.93743	20	0.000727085	0.0049505	4054	0.317659	1	0.788898	2.87428	0.347913	1	2	0.000262467	0.5
GO:0007165	signal transduction	402	1.56555e-09	1.5762e-05	3.92089e-08	1.14534	1203.13	1378	0.297805	0.341089	5399	0.50419	1	0.940209	1.00026	766.801	767	4408	0.201312	0.174002
GO:0042221	response to chemical stimulus	232	4.52082e-15	4.55156e-11	1.96188e-13	1.24545	838.253	1044	0.207488	0.258416	6697	0.802246	1	1	0.971146	574.579	558	3303	0.146457	0.168937
