# Supplementary material for: Dnmt3a knockout in excitatory neurons impairs postnatal synapse maturation and increases the repressive histone modification H3K27me3
Source: eLife. 2022 May 23;11:e66909. doi: 10.7554/eLife.66909 (PMC9170249; doi:10.7554/eLife.66909)
Supplement: Supplementary file 9. [file elife-66909-supp9.xlsx]

## Sheet: Readme
Supplementary File 9. List of developmental regulated H3K27me3 signal regions in control pyramidal neurons.
Differential histone signal analysis were performed using DiffBind. See the "Methods" section for detailed parameters.
The tables were imported from BED6 files, in which the coordinates are from the mm10 genome and 0-based.
The "name" field contains the following information of each regions in order, separated by the pipe symbol ("|"): unique region id, the H3K27me3 signal (log2 mean reads count) in sample 1 in the region, the H3K27me3 signal (log2 mean reads count) in sample 2 in the region, log2 fold difference between sample 1 and sample 2. Check the table header for sample information.
The "score" field is a placeholder to fulfill the requirement of the BED6 format and hence contains no specific infromation about the regions. And the "strand" field is filled with all "." signs to indicate no strand information for the regions.

## Sheet: E14 < P0
chrom	start	end	name (id|log2_P0|log2_E14|log2_diff)	score	strand
chr17	91337799	91340999	DB_Ctrl_dev_H3K27me3_P0_vs_E14_up_133|3.22|-0.44|3.66	0	.
chr18	86902599	86909799	DB_Ctrl_dev_H3K27me3_P0_vs_E14_up_148|3.13|-0.6|3.73	0	.

## Sheet: E14 > P0
chrom	start	end	name (id|log2_P0|log2_E14|log2_diff)	score	strand
chr1	56975399	56989599	DB_Ctrl_dev_H3K27me3_P0_vs_E14_down_2|2.93|5.86|-2.92	0	.
chr11	50597799	50608799	DB_Ctrl_dev_H3K27me3_P0_vs_E14_down_3|0.88|5.49|-4.61	0	.
chr3	144175399	144202599	DB_Ctrl_dev_H3K27me3_P0_vs_E14_down_4|2.75|5.65|-2.9	0	.
chr5	37230399	37244999	DB_Ctrl_dev_H3K27me3_P0_vs_E14_down_5|1.14|5.32|-4.18	0	.
chr7	5048799	5060599	DB_Ctrl_dev_H3K27me3_P0_vs_E14_down_6|2.09|5.56|-3.47	0	.
chr5	36864399	36878999	DB_Ctrl_dev_H3K27me3_P0_vs_E14_down_7|3.6|5.91|-2.31	0	.
chr11	6061999	6070999	DB_Ctrl_dev_H3K27me3_P0_vs_E14_down_8|0.88|5.24|-4.36	0	.
chr9	56792199	56801799	DB_Ctrl_dev_H3K27me3_P0_vs_E14_down_9|1.74|5.35|-3.61	0	.
chr15	102684999	102700799	DB_Ctrl_dev_H3K27me3_P0_vs_E14_down_10|-0.25|5.38|-5.63	0	.
chr3	95169599	95175799	DB_Ctrl_dev_H3K27me3_P0_vs_E14_down_11|0.88|5.16|-4.28	0	.
chr19	46310199	46321599	DB_Ctrl_dev_H3K27me3_P0_vs_E14_down_12|2.92|5.54|-2.62	0	.
chr2	162119999	162139399	DB_Ctrl_dev_H3K27me3_P0_vs_E14_down_13|1.35|5.15|-3.8	0	.
chr5	135855399	135871599	DB_Ctrl_dev_H3K27me3_P0_vs_E14_down_14|4.54|6.37|-1.84	0	.
chr14	66273599	66282799	DB_Ctrl_dev_H3K27me3_P0_vs_E14_down_15|0.88|5.04|-4.16	0	.
chr8	124793199	124810599	DB_Ctrl_dev_H3K27me3_P0_vs_E14_down_16|2.4|5.38|-2.99	0	.
chr11	4943199	4963999	DB_Ctrl_dev_H3K27me3_P0_vs_E14_down_17|4.47|6.29|-1.82	0	.
chr9	47880999	47918599	DB_Ctrl_dev_H3K27me3_P0_vs_E14_down_18|5.22|6.67|-1.45	0	.
chr6	87729199	87740799	DB_Ctrl_dev_H3K27me3_P0_vs_E14_down_19|2.99|5.51|-2.51	0	.
chr16	5876999	5889799	DB_Ctrl_dev_H3K27me3_P0_vs_E14_down_20|0.42|4.87|-4.45	0	.
chr18	7000199	7009399	DB_Ctrl_dev_H3K27me3_P0_vs_E14_down_21|2.91|5.6|-2.69	0	.
chr15	74514599	74520799	DB_Ctrl_dev_H3K27me3_P0_vs_E14_down_22|3.16|5.49|-2.32	0	.
chr2	33536799	33546399	DB_Ctrl_dev_H3K27me3_P0_vs_E14_down_23|0.24|4.82|-4.57	0	.
chr8	12329599	12356599	DB_Ctrl_dev_H3K27me3_P0_vs_E14_down_24|3.4|5.72|-2.32	0	.
chr6	127764599	127774599	DB_Ctrl_dev_H3K27me3_P0_vs_E14_down_25|1.13|4.86|-3.73	0	.
chr8	69876599	69891399	DB_Ctrl_dev_H3K27me3_P0_vs_E14_down_26|5.8|7.02|-1.22	0	.
chr15	28196599	28210399	DB_Ctrl_dev_H3K27me3_P0_vs_E14_down_27|1.13|4.87|-3.74	0	.
chr14	29715999	29729199	DB_Ctrl_dev_H3K27me3_P0_vs_E14_down_28|1.69|5.07|-3.38	0	.
chr7	131958399	131969599	DB_Ctrl_dev_H3K27me3_P0_vs_E14_down_29|1.02|4.82|-3.8	0	.
chr5	147125399	147169199	DB_Ctrl_dev_H3K27me3_P0_vs_E14_down_30|5.2|6.64|-1.44	0	.
chr16	95698399	95712599	DB_Ctrl_dev_H3K27me3_P0_vs_E14_down_31|0.88|4.79|-3.91	0	.
chr16	5743599	5755799	DB_Ctrl_dev_H3K27me3_P0_vs_E14_down_32|0.24|4.74|-4.5	0	.
chr3	118429399	118437199	DB_Ctrl_dev_H3K27me3_P0_vs_E14_down_33|-0.25|4.77|-5.02	0	.
chr7	138932799	138948599	DB_Ctrl_dev_H3K27me3_P0_vs_E14_down_34|2.83|5.3|-2.47	0	.
chr2	156416599	156426399	DB_Ctrl_dev_H3K27me3_P0_vs_E14_down_35|1.13|4.78|-3.65	0	.
chr5	35274399	35284199	DB_Ctrl_dev_H3K27me3_P0_vs_E14_down_36|2.77|5.44|-2.68	0	.
chr4	47205799	47216399	DB_Ctrl_dev_H3K27me3_P0_vs_E14_down_37|1.84|5.06|-3.22	0	.
chr14	66906399	66913399	DB_Ctrl_dev_H3K27me3_P0_vs_E14_down_38|1.13|4.76|-3.63	0	.
chr2	28736399	28796799	DB_Ctrl_dev_H3K27me3_P0_vs_E14_down_39|6.39|7.45|-1.06	0	.
chr9	122565999	122577399	DB_Ctrl_dev_H3K27me3_P0_vs_E14_down_40|4.28|6.02|-1.74	0	.
chr6	28128399	28140599	DB_Ctrl_dev_H3K27me3_P0_vs_E14_down_41|-0.25|4.68|-4.93	0	.
chr7	4836599	4849599	DB_Ctrl_dev_H3K27me3_P0_vs_E14_down_42|-0.25|4.66|-4.91	0	.
chr7	98172599	98187199	DB_Ctrl_dev_H3K27me3_P0_vs_E14_down_43|0.88|4.67|-3.79	0	.
chr5	137287199	137293199	DB_Ctrl_dev_H3K27me3_P0_vs_E14_down_44|0.42|4.61|-4.19	0	.
chr3	143404599	143417799	DB_Ctrl_dev_H3K27me3_P0_vs_E14_down_45|-0.25|4.63|-4.88	0	.
chr4	46989199	47000199	DB_Ctrl_dev_H3K27me3_P0_vs_E14_down_46|3.1|5.35|-2.24	0	.
chr9	48124799	48155999	DB_Ctrl_dev_H3K27me3_P0_vs_E14_down_47|4.72|6.33|-1.61	0	.
chr14	55760399	55779399	DB_Ctrl_dev_H3K27me3_P0_vs_E14_down_48|3.95|5.79|-1.84	0	.
chr2	60868199	60886999	DB_Ctrl_dev_H3K27me3_P0_vs_E14_down_49|4.43|6.07|-1.64	0	.
chr11	3758599	3778599	DB_Ctrl_dev_H3K27me3_P0_vs_E14_down_50|3.9|5.8|-1.9	0	.
chr2	181132599	181141999	DB_Ctrl_dev_H3K27me3_P0_vs_E14_down_51|1.02|4.64|-3.63	0	.
chr4	139069799	139079599	DB_Ctrl_dev_H3K27me3_P0_vs_E14_down_52|2.93|5.27|-2.34	0	.
chr10	79710199	79726799	DB_Ctrl_dev_H3K27me3_P0_vs_E14_down_53|3.84|5.7|-1.86	0	.
chr5	9718999	9728599	DB_Ctrl_dev_H3K27me3_P0_vs_E14_down_54|0.9|4.64|-3.74	0	.
chr7	40896199	40904799	DB_Ctrl_dev_H3K27me3_P0_vs_E14_down_55|0.9|4.63|-3.73	0	.
chr16	35147399	35159199	DB_Ctrl_dev_H3K27me3_P0_vs_E14_down_56|-0.25|4.55|-4.8	0	.
chr11	114061199	114068599	DB_Ctrl_dev_H3K27me3_P0_vs_E14_down_57|2.56|5.08|-2.53	0	.
chr5	116302199	116312399	DB_Ctrl_dev_H3K27me3_P0_vs_E14_down_58|-0.25|4.54|-4.79	0	.
chr8	35592399	35611399	DB_Ctrl_dev_H3K27me3_P0_vs_E14_down_59|0.9|4.61|-3.71	0	.
chr7	16944799	16950199	DB_Ctrl_dev_H3K27me3_P0_vs_E14_down_60|0.42|4.51|-4.08	0	.
chr2	143542399	143550199	DB_Ctrl_dev_H3K27me3_P0_vs_E14_down_61|0.61|4.56|-3.95	0	.
chr3	141462399	141468599	DB_Ctrl_dev_H3K27me3_P0_vs_E14_down_62|-0.25|4.48|-4.73	0	.
chr1	57597199	57615599	DB_Ctrl_dev_H3K27me3_P0_vs_E14_down_63|3.41|5.45|-2.04	0	.
chr4	133494199	133504599	DB_Ctrl_dev_H3K27me3_P0_vs_E14_down_64|3.52|5.48|-1.97	0	.
chr9	57689999	57705799	DB_Ctrl_dev_H3K27me3_P0_vs_E14_down_65|2.25|5.04|-2.79	0	.
chr7	57506399	57513199	DB_Ctrl_dev_H3K27me3_P0_vs_E14_down_66|2.2|5.09|-2.88	0	.
chr4	123169799	123190399	DB_Ctrl_dev_H3K27me3_P0_vs_E14_down_67|3.54|5.49|-1.95	0	.
chr15	34833599	34840399	DB_Ctrl_dev_H3K27me3_P0_vs_E14_down_68|1.52|4.68|-3.16	0	.
chr7	131798599	131814399	DB_Ctrl_dev_H3K27me3_P0_vs_E14_down_69|1.97|4.96|-2.99	0	.
chr13	96129199	96135599	DB_Ctrl_dev_H3K27me3_P0_vs_E14_down_70|-0.25|4.41|-4.66	0	.
chr10	121305999	121316399	DB_Ctrl_dev_H3K27me3_P0_vs_E14_down_71|0.24|4.4|-4.15	0	.
chr17	25424599	25438199	DB_Ctrl_dev_H3K27me3_P0_vs_E14_down_72|2.18|4.92|-2.74	0	.
chr5	146579799	146589999	DB_Ctrl_dev_H3K27me3_P0_vs_E14_down_73|1.69|4.83|-3.14	0	.
chr12	116938799	116951399	DB_Ctrl_dev_H3K27me3_P0_vs_E14_down_74|0.24|4.39|-4.15	0	.
chr3	89314199	89323399	DB_Ctrl_dev_H3K27me3_P0_vs_E14_down_75|1.44|4.66|-3.22	0	.
chr11	74602799	74623599	DB_Ctrl_dev_H3K27me3_P0_vs_E14_down_76|4.8|6.27|-1.48	0	.
chr12	11145199	11151999	DB_Ctrl_dev_H3K27me3_P0_vs_E14_down_77|1.02|4.51|-3.49	0	.
chr6	124992999	125006199	DB_Ctrl_dev_H3K27me3_P0_vs_E14_down_78|-0.25|4.42|-4.67	0	.
chr3	55752799	55770399	DB_Ctrl_dev_H3K27me3_P0_vs_E14_down_79|1.84|4.9|-3.06	0	.
chr14	22434999	22456399	DB_Ctrl_dev_H3K27me3_P0_vs_E14_down_80|2.4|5.15|-2.75	0	.
chr2	19651999	19662799	DB_Ctrl_dev_H3K27me3_P0_vs_E14_down_81|-0.25|4.38|-4.63	0	.
chr2	109906999	109924199	DB_Ctrl_dev_H3K27me3_P0_vs_E14_down_82|3.3|5.41|-2.11	0	.
chr5	30583399	30591999	DB_Ctrl_dev_H3K27me3_P0_vs_E14_down_83|1.84|4.87|-3.03	0	.
chr2	77813199	77820999	DB_Ctrl_dev_H3K27me3_P0_vs_E14_down_84|1.14|4.59|-3.44	0	.
chr7	39721799	39734399	DB_Ctrl_dev_H3K27me3_P0_vs_E14_down_85|0.9|4.5|-3.6	0	.
chr9	21024999	21043199	DB_Ctrl_dev_H3K27me3_P0_vs_E14_down_86|5.45|6.64|-1.19	0	.
chr18	38206599	38221599	DB_Ctrl_dev_H3K27me3_P0_vs_E14_down_87|3.9|5.66|-1.76	0	.
chr4	149760599	149785999	DB_Ctrl_dev_H3K27me3_P0_vs_E14_down_88|4.45|5.96|-1.52	0	.
chr15	76514599	76521799	DB_Ctrl_dev_H3K27me3_P0_vs_E14_down_89|2.69|5.21|-2.52	0	.
chr6	126736199	126742399	DB_Ctrl_dev_H3K27me3_P0_vs_E14_down_90|1.23|4.54|-3.31	0	.
chr2	180889199	180894599	DB_Ctrl_dev_H3K27me3_P0_vs_E14_down_91|0.9|4.47|-3.57	0	.
chr7	44586999	44595199	DB_Ctrl_dev_H3K27me3_P0_vs_E14_down_92|2.96|5.16|-2.2	0	.
chr5	113452199	113471599	DB_Ctrl_dev_H3K27me3_P0_vs_E14_down_93|1.84|4.86|-3.02	0	.
chr11	104231799	104238199	DB_Ctrl_dev_H3K27me3_P0_vs_E14_down_94|-0.25|4.3|-4.55	0	.
chr9	44040199	44045999	DB_Ctrl_dev_H3K27me3_P0_vs_E14_down_95|-0.25|4.3|-4.55	0	.
chr2	28989799	29062999	DB_Ctrl_dev_H3K27me3_P0_vs_E14_down_96|7.17|8|-0.83	0	.
chr3	9343199	9351399	DB_Ctrl_dev_H3K27me3_P0_vs_E14_down_97|-0.25|4.29|-4.54	0	.
chr11	59072399	59086999	DB_Ctrl_dev_H3K27me3_P0_vs_E14_down_98|-0.25|4.3|-4.55	0	.
chr7	46394199	46401399	DB_Ctrl_dev_H3K27me3_P0_vs_E14_down_99|1.74|4.73|-2.99	0	.
chr1	38834599	38843399	DB_Ctrl_dev_H3K27me3_P0_vs_E14_down_100|-0.25|4.28|-4.53	0	.
chr7	45696799	45703399	DB_Ctrl_dev_H3K27me3_P0_vs_E14_down_101|0.42|4.29|-3.87	0	.
chr2	25301599	25314999	DB_Ctrl_dev_H3K27me3_P0_vs_E14_down_102|3.37|5.39|-2.02	0	.
chr11	7055999	7069799	DB_Ctrl_dev_H3K27me3_P0_vs_E14_down_103|1.89|4.71|-2.82	0	.
chr2	133546399	133558599	DB_Ctrl_dev_H3K27me3_P0_vs_E14_down_104|3.91|5.61|-1.7	0	.
chr4	153473999	153485999	DB_Ctrl_dev_H3K27me3_P0_vs_E14_down_105|2.72|5.02|-2.3	0	.
chr7	43790399	43803199	DB_Ctrl_dev_H3K27me3_P0_vs_E14_down_106|1.96|4.75|-2.79	0	.
chr11	49159999	49172399	DB_Ctrl_dev_H3K27me3_P0_vs_E14_down_107|-0.25|4.23|-4.48	0	.
chr6	145858599	145868599	DB_Ctrl_dev_H3K27me3_P0_vs_E14_down_108|3.34|5.33|-1.98	0	.
chr5	130441999	130453799	DB_Ctrl_dev_H3K27me3_P0_vs_E14_down_109|2.53|5.08|-2.54	0	.
chr12	112926399	112935199	DB_Ctrl_dev_H3K27me3_P0_vs_E14_down_110|1.83|4.67|-2.84	0	.
chr12	117529399	117537399	DB_Ctrl_dev_H3K27me3_P0_vs_E14_down_111|1.84|4.79|-2.95	0	.
chr10	127165199	127173599	DB_Ctrl_dev_H3K27me3_P0_vs_E14_down_112|2.68|4.99|-2.31	0	.
chr11	76661799	76678799	DB_Ctrl_dev_H3K27me3_P0_vs_E14_down_113|4.66|6.07|-1.41	0	.
chr15	78714399	78720799	DB_Ctrl_dev_H3K27me3_P0_vs_E14_down_114|1.69|4.72|-3.03	0	.
chr3	107454399	107466599	DB_Ctrl_dev_H3K27me3_P0_vs_E14_down_115|4.45|5.9|-1.46	0	.
chr11	118566999	118573399	DB_Ctrl_dev_H3K27me3_P0_vs_E14_down_116|3.57|5.42|-1.86	0	.
chr7	44350199	44359399	DB_Ctrl_dev_H3K27me3_P0_vs_E14_down_117|4.72|6.08|-1.37	0	.
chr8	121722199	121742199	DB_Ctrl_dev_H3K27me3_P0_vs_E14_down_118|3.96|5.61|-1.65	0	.
chr3	141584599	141596399	DB_Ctrl_dev_H3K27me3_P0_vs_E14_down_119|0.75|4.3|-3.54	0	.
chr7	131452399	131480199	DB_Ctrl_dev_H3K27me3_P0_vs_E14_down_120|4.62|6.04|-1.42	0	.
chr16	6971199	6978799	DB_Ctrl_dev_H3K27me3_P0_vs_E14_down_121|-0.25|4.2|-4.45	0	.
chr5	101513999	101550199	DB_Ctrl_dev_H3K27me3_P0_vs_E14_down_122|6.26|7.22|-0.97	0	.
chr17	85395199	85407999	DB_Ctrl_dev_H3K27me3_P0_vs_E14_down_123|0.75|4.28|-3.53	0	.
chr11	119541199	119554199	DB_Ctrl_dev_H3K27me3_P0_vs_E14_down_124|1.14|4.45|-3.31	0	.
chr3	121256999	121268799	DB_Ctrl_dev_H3K27me3_P0_vs_E14_down_125|1.23|4.43|-3.2	0	.
chr16	5731999	5742599	DB_Ctrl_dev_H3K27me3_P0_vs_E14_down_126|1.23|4.43|-3.2	0	.
chr19	58990999	59003799	DB_Ctrl_dev_H3K27me3_P0_vs_E14_down_127|-0.25|4.16|-4.4	0	.
chr8	17531399	17538999	DB_Ctrl_dev_H3K27me3_P0_vs_E14_down_128|0.61|4.24|-3.63	0	.
chr7	19310599	19321199	DB_Ctrl_dev_H3K27me3_P0_vs_E14_down_129|0.9|4.33|-3.43	0	.
chr8	11308399	11319799	DB_Ctrl_dev_H3K27me3_P0_vs_E14_down_130|2.65|4.97|-2.32	0	.
chr11	100390999	100397999	DB_Ctrl_dev_H3K27me3_P0_vs_E14_down_131|-0.25|4.14|-4.39	0	.
chr9	44079999	44090199	DB_Ctrl_dev_H3K27me3_P0_vs_E14_down_132|2.48|4.88|-2.4	0	.
chr7	139523999	139535199	DB_Ctrl_dev_H3K27me3_P0_vs_E14_down_134|1.34|4.41|-3.07	0	.
chr16	31931199	31936999	DB_Ctrl_dev_H3K27me3_P0_vs_E14_down_135|-0.25|4.13|-4.38	0	.
chr16	11981399	11989399	DB_Ctrl_dev_H3K27me3_P0_vs_E14_down_136|2.57|5|-2.42	0	.
chr15	80664399	80676399	DB_Ctrl_dev_H3K27me3_P0_vs_E14_down_137|2.6|4.92|-2.32	0	.
chr10	81015999	81026199	DB_Ctrl_dev_H3K27me3_P0_vs_E14_down_138|1.35|4.5|-3.15	0	.
chr19	4675999	4691599	DB_Ctrl_dev_H3K27me3_P0_vs_E14_down_139|-0.25|4.13|-4.38	0	.
chr4	124647599	124670599	DB_Ctrl_dev_H3K27me3_P0_vs_E14_down_140|4.36|5.83|-1.46	0	.
chr6	148440199	148448199	DB_Ctrl_dev_H3K27me3_P0_vs_E14_down_141|-0.25|4.12|-4.37	0	.
chr4	107425599	107445399	DB_Ctrl_dev_H3K27me3_P0_vs_E14_down_142|4.43|5.91|-1.48	0	.
chr11	65870199	65883199	DB_Ctrl_dev_H3K27me3_P0_vs_E14_down_143|-0.25|4.12|-4.37	0	.
chr8	84780999	84787399	DB_Ctrl_dev_H3K27me3_P0_vs_E14_down_144|-0.25|4.12|-4.37	0	.
chr8	120631399	120637999	DB_Ctrl_dev_H3K27me3_P0_vs_E14_down_145|2.07|4.69|-2.61	0	.
chr1	75257799	75286199	DB_Ctrl_dev_H3K27me3_P0_vs_E14_down_146|4.97|6.24|-1.27	0	.
chr1	89727399	89739999	DB_Ctrl_dev_H3K27me3_P0_vs_E14_down_147|2.07|4.68|-2.61	0	.
chr14	70883599	70894199	DB_Ctrl_dev_H3K27me3_P0_vs_E14_down_149|2.79|4.99|-2.2	0	.
chr11	5054199	5064999	DB_Ctrl_dev_H3K27me3_P0_vs_E14_down_150|4.64|6.01|-1.36	0	.
chr11	51645399	51653199	DB_Ctrl_dev_H3K27me3_P0_vs_E14_down_151|0.75|4.2|-3.45	0	.
chr6	126639999	126651799	DB_Ctrl_dev_H3K27me3_P0_vs_E14_down_152|2.24|4.76|-2.52	0	.
chr15	98674799	98688999	DB_Ctrl_dev_H3K27me3_P0_vs_E14_down_153|1.14|4.39|-3.25	0	.
chr7	143341799	143388799	DB_Ctrl_dev_H3K27me3_P0_vs_E14_down_154|6.08|7.1|-1.02	0	.
chr9	40833199	40845999	DB_Ctrl_dev_H3K27me3_P0_vs_E14_down_155|-0.25|4.09|-4.34	0	.
chr10	13565599	13575599	DB_Ctrl_dev_H3K27me3_P0_vs_E14_down_156|-0.25|4.09|-4.33	0	.
chr3	68491399	68500599	DB_Ctrl_dev_H3K27me3_P0_vs_E14_down_157|0.61|4.19|-3.58	0	.
chr18	77182199	77188799	DB_Ctrl_dev_H3K27me3_P0_vs_E14_down_158|0.61|4.19|-3.58	0	.
chr7	44329999	44342999	DB_Ctrl_dev_H3K27me3_P0_vs_E14_down_159|2.33|4.82|-2.49	0	.
chr1	134231799	134237199	DB_Ctrl_dev_H3K27me3_P0_vs_E14_down_160|0.42|4.11|-3.69	0	.
chr12	24678799	24684999	DB_Ctrl_dev_H3K27me3_P0_vs_E14_down_161|0.9|4.26|-3.36	0	.
chr11	75187599	75197399	DB_Ctrl_dev_H3K27me3_P0_vs_E14_down_162|3.74|5.46|-1.72	0	.
chr12	56424399	56549599	DB_Ctrl_dev_H3K27me3_P0_vs_E14_down_163|8.2|8.99|-0.79	0	.
chr13	118711799	118718399	DB_Ctrl_dev_H3K27me3_P0_vs_E14_down_164|1.67|4.52|-2.84	0	.
chr17	44726599	44742599	DB_Ctrl_dev_H3K27me3_P0_vs_E14_down_165|4.95|6.19|-1.25	0	.
chr8	102782599	102788999	DB_Ctrl_dev_H3K27me3_P0_vs_E14_down_166|-0.25|4.05|-4.3	0	.
chr11	55178199	55193999	DB_Ctrl_dev_H3K27me3_P0_vs_E14_down_167|-0.25|4.04|-4.29	0	.
chr16	29715399	29732199	DB_Ctrl_dev_H3K27me3_P0_vs_E14_down_168|3.14|5.13|-1.99	0	.
chr15	79498799	79519999	DB_Ctrl_dev_H3K27me3_P0_vs_E14_down_169|5.49|6.57|-1.08	0	.
chr9	107979199	107987999	DB_Ctrl_dev_H3K27me3_P0_vs_E14_down_170|-0.25|4.03|-4.28	0	.
chr9	61469399	61492399	DB_Ctrl_dev_H3K27me3_P0_vs_E14_down_171|3.06|5.25|-2.19	0	.
chr2	164958399	164974999	DB_Ctrl_dev_H3K27me3_P0_vs_E14_down_172|4.63|5.97|-1.34	0	.
chr11	74583799	74594999	DB_Ctrl_dev_H3K27me3_P0_vs_E14_down_173|2.82|4.96|-2.14	0	.
chr8	125991399	125998399	DB_Ctrl_dev_H3K27me3_P0_vs_E14_down_174|-0.25|4.03|-4.28	0	.
chr6	29913599	29921799	DB_Ctrl_dev_H3K27me3_P0_vs_E14_down_175|0.24|4.07|-3.83	0	.
chr1	86298599	86308599	DB_Ctrl_dev_H3K27me3_P0_vs_E14_down_176|1.35|4.43|-3.08	0	.
chr11	88998199	89001799	DB_Ctrl_dev_H3K27me3_P0_vs_E14_down_177|-0.25|4.02|-4.27	0	.
chr6	88970799	88992599	DB_Ctrl_dev_H3K27me3_P0_vs_E14_down_178|3.58|5.4|-1.82	0	.
chr4	47418399	47432199	DB_Ctrl_dev_H3K27me3_P0_vs_E14_down_179|1.35|4.43|-3.08	0	.
chr7	27361599	27381199	DB_Ctrl_dev_H3K27me3_P0_vs_E14_down_180|5.64|6.7|-1.06	0	.
chr7	113207799	113211999	DB_Ctrl_dev_H3K27me3_P0_vs_E14_down_181|1.23|4.31|-3.08	0	.
chr11	85483399	85493399	DB_Ctrl_dev_H3K27me3_P0_vs_E14_down_182|1.67|4.49|-2.82	0	.
chr13	76052599	76059999	DB_Ctrl_dev_H3K27me3_P0_vs_E14_down_183|1.69|4.6|-2.9	0	.
chr4	131574999	131588199	DB_Ctrl_dev_H3K27me3_P0_vs_E14_down_184|2.08|4.67|-2.59	0	.
chr6	114037799	114044599	DB_Ctrl_dev_H3K27me3_P0_vs_E14_down_185|0.24|4.05|-3.8	0	.
chr7	139545399	139552799	DB_Ctrl_dev_H3K27me3_P0_vs_E14_down_186|-0.25|4|-4.25	0	.
chr10	60105599	60110199	DB_Ctrl_dev_H3K27me3_P0_vs_E14_down_187|0.61|4.13|-3.52	0	.
chr1	131240399	131246199	DB_Ctrl_dev_H3K27me3_P0_vs_E14_down_188|1.75|4.48|-2.73	0	.
chr8	9768599	9775599	DB_Ctrl_dev_H3K27me3_P0_vs_E14_down_189|0.42|4.06|-3.64	0	.
chr3	152662999	152671399	DB_Ctrl_dev_H3K27me3_P0_vs_E14_down_190|1.69|4.6|-2.91	0	.
chr7	139890599	139897999	DB_Ctrl_dev_H3K27me3_P0_vs_E14_down_191|-0.25|3.99|-4.24	0	.
chr18	74953399	74963999	DB_Ctrl_dev_H3K27me3_P0_vs_E14_down_192|1.53|4.5|-2.96	0	.
chr15	25486999	25512599	DB_Ctrl_dev_H3K27me3_P0_vs_E14_down_193|5.29|6.44|-1.15	0	.
chr2	74452799	74467999	DB_Ctrl_dev_H3K27me3_P0_vs_E14_down_194|3.02|5.07|-2.05	0	.
chr5	34280999	34291399	DB_Ctrl_dev_H3K27me3_P0_vs_E14_down_195|3.16|5.11|-1.95	0	.
chr6	118467199	118488799	DB_Ctrl_dev_H3K27me3_P0_vs_E14_down_196|4.79|6.18|-1.39	0	.
chr5	108362999	108381199	DB_Ctrl_dev_H3K27me3_P0_vs_E14_down_197|5.02|6.32|-1.3	0	.
chr14	28375999	28387799	DB_Ctrl_dev_H3K27me3_P0_vs_E14_down_198|1.84|4.66|-2.82	0	.
chr6	138572399	138598999	DB_Ctrl_dev_H3K27me3_P0_vs_E14_down_199|5.04|6.22|-1.18	0	.
chr16	18618399	18628999	DB_Ctrl_dev_H3K27me3_P0_vs_E14_down_200|4.02|5.62|-1.59	0	.
chr19	59128999	59200199	DB_Ctrl_dev_H3K27me3_P0_vs_E14_down_201|7.19|8.09|-0.9	0	.
chr1	152395999	152404599	DB_Ctrl_dev_H3K27me3_P0_vs_E14_down_202|-0.25|3.97|-4.22	0	.
chr14	70549199	70562199	DB_Ctrl_dev_H3K27me3_P0_vs_E14_down_203|2.9|5|-2.11	0	.
chr10	41067399	41074999	DB_Ctrl_dev_H3K27me3_P0_vs_E14_down_204|1.14|4.31|-3.16	0	.
chr7	112221599	112230599	DB_Ctrl_dev_H3K27me3_P0_vs_E14_down_205|1.82|4.5|-2.68	0	.
chr17	28136999	28145799	DB_Ctrl_dev_H3K27me3_P0_vs_E14_down_206|0.9|4.2|-3.3	0	.
chr8	86324999	86334999	DB_Ctrl_dev_H3K27me3_P0_vs_E14_down_207|0.42|4.02|-3.6	0	.
chr8	84976799	84983599	DB_Ctrl_dev_H3K27me3_P0_vs_E14_down_208|2.14|4.64|-2.5	0	.
chr15	43165399	43173399	DB_Ctrl_dev_H3K27me3_P0_vs_E14_down_209|2.43|4.75|-2.32	0	.
chr7	45235599	45241999	DB_Ctrl_dev_H3K27me3_P0_vs_E14_down_210|-0.25|3.94|-4.19	0	.
chr11	97491599	97510599	DB_Ctrl_dev_H3K27me3_P0_vs_E14_down_211|4.11|5.69|-1.58	0	.
chr7	122287399	122294399	DB_Ctrl_dev_H3K27me3_P0_vs_E14_down_212|1.68|4.42|-2.74	0	.
chr3	103569599	103584199	DB_Ctrl_dev_H3K27me3_P0_vs_E14_down_213|3.71|5.5|-1.79	0	.
chr11	103169599	103173999	DB_Ctrl_dev_H3K27me3_P0_vs_E14_down_214|1.44|4.35|-2.92	0	.
chr8	123883199	123897399	DB_Ctrl_dev_H3K27me3_P0_vs_E14_down_215|4.2|5.66|-1.46	0	.
chr10	127075199	127087199	DB_Ctrl_dev_H3K27me3_P0_vs_E14_down_216|3.7|5.37|-1.67	0	.
chr2	144116999	144135199	DB_Ctrl_dev_H3K27me3_P0_vs_E14_down_217|3.03|5.13|-2.1	0	.
chr7	45831199	45838599	DB_Ctrl_dev_H3K27me3_P0_vs_E14_down_218|4.02|5.55|-1.53	0	.
chr15	98767599	98811399	DB_Ctrl_dev_H3K27me3_P0_vs_E14_down_219|7.56|8.33|-0.77	0	.
chr4	136460799	136464999	DB_Ctrl_dev_H3K27me3_P0_vs_E14_down_220|-0.25|3.92|-4.17	0	.
chr5	81020399	81027799	DB_Ctrl_dev_H3K27me3_P0_vs_E14_down_221|1.69|4.53|-2.84	0	.
chr10	59534399	59542799	DB_Ctrl_dev_H3K27me3_P0_vs_E14_down_222|0.24|3.97|-3.72	0	.
chr13	51566399	51569199	DB_Ctrl_dev_H3K27me3_P0_vs_E14_down_223|-0.25|3.92|-4.17	0	.
chr2	90883999	90894199	DB_Ctrl_dev_H3K27me3_P0_vs_E14_down_224|2.68|4.85|-2.17	0	.
chr9	59575599	59584599	DB_Ctrl_dev_H3K27me3_P0_vs_E14_down_225|-0.25|3.9|-4.15	0	.
chr17	85385599	85394399	DB_Ctrl_dev_H3K27me3_P0_vs_E14_down_226|-0.25|3.91|-4.16	0	.
chr18	36509999	36519199	DB_Ctrl_dev_H3K27me3_P0_vs_E14_down_227|-0.25|3.9|-4.15	0	.
chr15	64918399	64926199	DB_Ctrl_dev_H3K27me3_P0_vs_E14_down_228|3.05|5.01|-1.96	0	.
chr8	70476399	70503799	DB_Ctrl_dev_H3K27me3_P0_vs_E14_down_229|6.51|7.34|-0.83	0	.
chr11	98491599	98505999	DB_Ctrl_dev_H3K27me3_P0_vs_E14_down_230|3.1|5.03|-1.93	0	.
chr18	36191199	36200999	DB_Ctrl_dev_H3K27me3_P0_vs_E14_down_231|-0.25|3.89|-4.14	0	.
chr2	155771799	155778799	DB_Ctrl_dev_H3K27me3_P0_vs_E14_down_232|1.83|4.47|-2.64	0	.
chr4	124877999	124897599	DB_Ctrl_dev_H3K27me3_P0_vs_E14_down_233|4.89|6.26|-1.37	0	.
chr8	105252399	105281199	DB_Ctrl_dev_H3K27me3_P0_vs_E14_down_234|6.31|7.19|-0.87	0	.
chr1	91838799	91850599	DB_Ctrl_dev_H3K27me3_P0_vs_E14_down_235|0.75|4.04|-3.28	0	.
chr1	180478799	180484399	DB_Ctrl_dev_H3K27me3_P0_vs_E14_down_236|1.83|4.46|-2.63	0	.
chr7	125428799	125441999	DB_Ctrl_dev_H3K27me3_P0_vs_E14_down_237|0.42|3.95|-3.53	0	.
chr15	76086999	76092999	DB_Ctrl_dev_H3K27me3_P0_vs_E14_down_238|1.34|4.22|-2.88	0	.
chr5	146965399	146986399	DB_Ctrl_dev_H3K27me3_P0_vs_E14_down_239|2.69|4.89|-2.21	0	.
chr4	147489599	147501399	DB_Ctrl_dev_H3K27me3_P0_vs_E14_down_240|-0.25|3.88|-4.13	0	.
chr2	150516999	150529599	DB_Ctrl_dev_H3K27me3_P0_vs_E14_down_241|2.12|4.7|-2.58	0	.
chr18	51113999	51119799	DB_Ctrl_dev_H3K27me3_P0_vs_E14_down_242|-0.25|3.88|-4.12	0	.
chr1	87148399	87160799	DB_Ctrl_dev_H3K27me3_P0_vs_E14_down_243|4.8|6.04|-1.24	0	.
chr7	120158599	120169999	DB_Ctrl_dev_H3K27me3_P0_vs_E14_down_244|1.14|4.22|-3.08	0	.
chr5	37024599	37031999	DB_Ctrl_dev_H3K27me3_P0_vs_E14_down_245|2.34|4.66|-2.33	0	.
chr2	26966199	26978799	DB_Ctrl_dev_H3K27me3_P0_vs_E14_down_246|0.42|3.94|-3.52	0	.
chr6	29503799	29519399	DB_Ctrl_dev_H3K27me3_P0_vs_E14_down_247|3.24|5.09|-1.86	0	.
chr11	40455999	40472399	DB_Ctrl_dev_H3K27me3_P0_vs_E14_down_248|3.7|5.34|-1.64	0	.
chr1	64914199	64918999	DB_Ctrl_dev_H3K27me3_P0_vs_E14_down_249|0.24|3.92|-3.67	0	.
chr6	83683799	83727199	DB_Ctrl_dev_H3K27me3_P0_vs_E14_down_250|7.22|8.02|-0.8	0	.
chr6	50450799	50460199	DB_Ctrl_dev_H3K27me3_P0_vs_E14_down_251|-0.25|3.86|-4.11	0	.
chr2	33127999	33134999	DB_Ctrl_dev_H3K27me3_P0_vs_E14_down_252|-0.25|3.86|-4.11	0	.
chr2	25392599	25402599	DB_Ctrl_dev_H3K27me3_P0_vs_E14_down_253|3.27|5.11|-1.84	0	.
chr5	74995799	75003999	DB_Ctrl_dev_H3K27me3_P0_vs_E14_down_254|-0.25|3.85|-4.1	0	.
chr6	12746199	12751599	DB_Ctrl_dev_H3K27me3_P0_vs_E14_down_255|0.61|4.01|-3.4	0	.
chr5	107400399	107408799	DB_Ctrl_dev_H3K27me3_P0_vs_E14_down_256|1.53|4.4|-2.87	0	.
chr7	27443799	27450199	DB_Ctrl_dev_H3K27me3_P0_vs_E14_down_257|1.14|4.21|-3.06	0	.
chr4	125718399	125744799	DB_Ctrl_dev_H3K27me3_P0_vs_E14_down_258|3.76|5.47|-1.71	0	.
chr2	162657399	162663399	DB_Ctrl_dev_H3K27me3_P0_vs_E14_down_259|1.35|4.31|-2.95	0	.
chr19	41166799	41193799	DB_Ctrl_dev_H3K27me3_P0_vs_E14_down_260|4.91|6.1|-1.19	0	.
chr2	74960599	74970999	DB_Ctrl_dev_H3K27me3_P0_vs_E14_down_261|-0.25|3.83|-4.08	0	.
chr11	30264599	30273599	DB_Ctrl_dev_H3K27me3_P0_vs_E14_down_262|-0.25|3.84|-4.08	0	.
chr15	100423199	100429599	DB_Ctrl_dev_H3K27me3_P0_vs_E14_down_263|1.42|4.23|-2.81	0	.
chr4	127985799	127993999	DB_Ctrl_dev_H3K27me3_P0_vs_E14_down_264|2.02|4.51|-2.49	0	.
chr2	28798799	28822199	DB_Ctrl_dev_H3K27me3_P0_vs_E14_down_265|3.62|5.3|-1.67	0	.
chr1	189802799	189823999	DB_Ctrl_dev_H3K27me3_P0_vs_E14_down_266|2.2|4.77|-2.57	0	.
chr16	17966399	17979999	DB_Ctrl_dev_H3K27me3_P0_vs_E14_down_267|-0.25|3.82|-4.07	0	.
chr3	94361999	94368799	DB_Ctrl_dev_H3K27me3_P0_vs_E14_down_268|0.9|4.09|-3.19	0	.
chr11	54025799	54029999	DB_Ctrl_dev_H3K27me3_P0_vs_E14_down_269|-0.25|3.83|-4.08	0	.
chr3	31304999	31311799	DB_Ctrl_dev_H3K27me3_P0_vs_E14_down_270|-0.25|3.82|-4.07	0	.
chr17	24684799	24690999	DB_Ctrl_dev_H3K27me3_P0_vs_E14_down_271|-0.25|3.82|-4.07	0	.
chr19	45591799	45615599	DB_Ctrl_dev_H3K27me3_P0_vs_E14_down_272|3.67|5.36|-1.69	0	.
chr8	71629599	71640399	DB_Ctrl_dev_H3K27me3_P0_vs_E14_down_273|-0.25|3.82|-4.06	0	.
chr11	76647399	76660999	DB_Ctrl_dev_H3K27me3_P0_vs_E14_down_274|2.62|4.93|-2.31	0	.
chr11	85722799	85730799	DB_Ctrl_dev_H3K27me3_P0_vs_E14_down_275|-0.25|3.81|-4.06	0	.
chr2	27616399	27629799	DB_Ctrl_dev_H3K27me3_P0_vs_E14_down_276|2.44|4.73|-2.29	0	.
chr11	113839399	113850799	DB_Ctrl_dev_H3K27me3_P0_vs_E14_down_277|1.51|4.3|-2.79	0	.
chr7	73738399	73743199	DB_Ctrl_dev_H3K27me3_P0_vs_E14_down_278|-0.25|3.81|-4.06	0	.
chr15	11940599	11953799	DB_Ctrl_dev_H3K27me3_P0_vs_E14_down_279|1.44|4.25|-2.82	0	.
chr9	108825599	108834999	DB_Ctrl_dev_H3K27me3_P0_vs_E14_down_280|1.13|4.1|-2.97	0	.
chr17	88764999	88775199	DB_Ctrl_dev_H3K27me3_P0_vs_E14_down_281|-0.25|3.81|-4.06	0	.
chr6	138562399	138571599	DB_Ctrl_dev_H3K27me3_P0_vs_E14_down_282|-0.25|3.81|-4.06	0	.
chr4	154755999	154770599	DB_Ctrl_dev_H3K27me3_P0_vs_E14_down_283|-0.25|3.82|-4.07	0	.
chr15	76715599	76723599	DB_Ctrl_dev_H3K27me3_P0_vs_E14_down_284|1.51|4.29|-2.78	0	.
chr19	3985999	3998199	DB_Ctrl_dev_H3K27me3_P0_vs_E14_down_285|1.42|4.22|-2.8	0	.
chr11	67919999	67922799	DB_Ctrl_dev_H3K27me3_P0_vs_E14_down_286|-0.25|3.79|-4.04	0	.
chr2	127372199	127384599	DB_Ctrl_dev_H3K27me3_P0_vs_E14_down_287|-0.25|3.79|-4.04	0	.
chr12	86981799	86998399	DB_Ctrl_dev_H3K27me3_P0_vs_E14_down_288|4.19|5.64|-1.45	0	.
chr15	11900599	11909599	DB_Ctrl_dev_H3K27me3_P0_vs_E14_down_289|4.05|5.57|-1.52	0	.
chr15	98621599	98634199	DB_Ctrl_dev_H3K27me3_P0_vs_E14_down_290|2.68|4.8|-2.11	0	.
chr6	50357999	50369399	DB_Ctrl_dev_H3K27me3_P0_vs_E14_down_291|-0.25|3.77|-4.02	0	.
chr16	76387999	76396799	DB_Ctrl_dev_H3K27me3_P0_vs_E14_down_292|0.24|3.85|-3.6	0	.
chr1	187600799	187614399	DB_Ctrl_dev_H3K27me3_P0_vs_E14_down_293|5.11|6.28|-1.17	0	.
chr15	99577399	99595999	DB_Ctrl_dev_H3K27me3_P0_vs_E14_down_294|5.51|6.51|-1	0	.
chr19	56717599	56726199	DB_Ctrl_dev_H3K27me3_P0_vs_E14_down_295|3.46|5.25|-1.79	0	.
chr8	106866599	106874199	DB_Ctrl_dev_H3K27me3_P0_vs_E14_down_296|2.09|4.68|-2.58	0	.
chr13	92129799	92136999	DB_Ctrl_dev_H3K27me3_P0_vs_E14_down_297|-0.25|3.77|-4.02	0	.
chr19	45580199	45589999	DB_Ctrl_dev_H3K27me3_P0_vs_E14_down_298|0.42|3.88|-3.45	0	.
chr12	117143599	117182599	DB_Ctrl_dev_H3K27me3_P0_vs_E14_down_299|6.3|7.23|-0.93	0	.
chr17	24766199	24776399	DB_Ctrl_dev_H3K27me3_P0_vs_E14_down_300|-0.25|3.82|-4.07	0	.

## Sheet: E14 < P39
chrom	start	end	name (id|log2_P39|log2_E14|log2_diff)	score	strand
chr5	51329599	51370199	DB_Ctrl_dev_H3K27me3_P39_vs_E14_up_32|8.98|6.74|2.24	0	.
chr7	115656399	115683799	DB_Ctrl_dev_H3K27me3_P39_vs_E14_up_89|8.47|6.24|2.23	0	.
chr14	34171799	34213199	DB_Ctrl_dev_H3K27me3_P39_vs_E14_up_100|9.09|7.31|1.78	0	.
chr10	120370799	120440199	DB_Ctrl_dev_H3K27me3_P39_vs_E14_up_111|10.08|8.71|1.37	0	.
chr7	115978199	116008399	DB_Ctrl_dev_H3K27me3_P39_vs_E14_up_118|8.42|6.34|2.09	0	.
chr5	127410799	127435399	DB_Ctrl_dev_H3K27me3_P39_vs_E14_up_130|8.05|5.68|2.37	0	.
chr4	64554599	64576999	DB_Ctrl_dev_H3K27me3_P39_vs_E14_up_161|7.8|5.33|2.48	0	.
chr4	64577999	64597799	DB_Ctrl_dev_H3K27me3_P39_vs_E14_up_181|7.89|5.49|2.4	0	.
chr7	115935199	115965799	DB_Ctrl_dev_H3K27me3_P39_vs_E14_up_184|8.34|6.43|1.9	0	.
chr8	89449799	89495399	DB_Ctrl_dev_H3K27me3_P39_vs_E14_up_185|8.95|7.39|1.56	0	.
chr6	49212999	49218199	DB_Ctrl_dev_H3K27me3_P39_vs_E14_up_195|7.26|3.84|3.42	0	.
chr11	76275399	76303199	DB_Ctrl_dev_H3K27me3_P39_vs_E14_up_196|8.26|6.25|2.02	0	.
chr17	72405399	72427799	DB_Ctrl_dev_H3K27me3_P39_vs_E14_up_205|8|5.92|2.08	0	.
chr1	62190799	62220999	DB_Ctrl_dev_H3K27me3_P39_vs_E14_up_237|8.27|6.06|2.21	0	.
chr6	49218999	49229199	DB_Ctrl_dev_H3K27me3_P39_vs_E14_up_272|7.56|5.04|2.53	0	.
chr1	102340799	102362399	DB_Ctrl_dev_H3K27me3_P39_vs_E14_up_282|7.79|5.71|2.08	0	.
chr8	40215399	40241999	DB_Ctrl_dev_H3K27me3_P39_vs_E14_up_289|8.28|6.57|1.71	0	.
chr13	112170199	112205399	DB_Ctrl_dev_H3K27me3_P39_vs_E14_up_291|8.84|7.28|1.56	0	.
chr18	55374799	55387799	DB_Ctrl_dev_H3K27me3_P39_vs_E14_up_312|7.07|3.93|3.15	0	.
chr5	19175199	19191599	DB_Ctrl_dev_H3K27me3_P39_vs_E14_up_314|7.32|4.58|2.74	0	.
chr4	45821799	45830399	DB_Ctrl_dev_H3K27me3_P39_vs_E14_up_335|7.01|3.85|3.16	0	.
chr2	137590399	137616599	DB_Ctrl_dev_H3K27me3_P39_vs_E14_up_344|8|5.98|2.02	0	.
chr11	95999999	96018199	DB_Ctrl_dev_H3K27me3_P39_vs_E14_up_345|8.28|6.53|1.74	0	.
chr8	71819399	71855599	DB_Ctrl_dev_H3K27me3_P39_vs_E14_up_361|8.51|7.02|1.49	0	.
chr7	115487399	115498999	DB_Ctrl_dev_H3K27me3_P39_vs_E14_up_365|7.02|3.82|3.2	0	.
chr7	115742599	115759199	DB_Ctrl_dev_H3K27me3_P39_vs_E14_up_375|7.42|4.98|2.44	0	.
chr8	89503599	89526199	DB_Ctrl_dev_H3K27me3_P39_vs_E14_up_393|8.35|6.74|1.61	0	.
chr14	34116999	34143399	DB_Ctrl_dev_H3K27me3_P39_vs_E14_up_407|8.4|6.66|1.74	0	.
chr7	115889199	115911599	DB_Ctrl_dev_H3K27me3_P39_vs_E14_up_418|7.91|5.83|2.08	0	.
chr3	127623799	127635799	DB_Ctrl_dev_H3K27me3_P39_vs_E14_up_424|7.5|5.13|2.37	0	.
chr2	118263599	118273999	DB_Ctrl_dev_H3K27me3_P39_vs_E14_up_436|6.72|3.37|3.35	0	.
chr10	120733199	120748399	DB_Ctrl_dev_H3K27me3_P39_vs_E14_up_440|7.72|5.77|1.95	0	.
chr11	101492799	101509199	DB_Ctrl_dev_H3K27me3_P39_vs_E14_up_445|7.49|5.35|2.15	0	.
chr9	117165199	117183599	DB_Ctrl_dev_H3K27me3_P39_vs_E14_up_458|7.68|5.47|2.21	0	.
chr13	111906799	111934199	DB_Ctrl_dev_H3K27me3_P39_vs_E14_up_474|8.46|6.96|1.5	0	.
chr12	118553199	118581399	DB_Ctrl_dev_H3K27me3_P39_vs_E14_up_489|8|6.33|1.67	0	.
chr2	72473399	72482399	DB_Ctrl_dev_H3K27me3_P39_vs_E14_up_493|7.06|4.34|2.71	0	.
chr1	6730999	6741399	DB_Ctrl_dev_H3K27me3_P39_vs_E14_up_508|6.73|3.08|3.65	0	.
chr11	18744199	18756399	DB_Ctrl_dev_H3K27me3_P39_vs_E14_up_510|7.52|5.52|2	0	.
chr5	26945999	26964399	DB_Ctrl_dev_H3K27me3_P39_vs_E14_up_522|7.86|6.06|1.8	0	.
chr4	95183599	95219999	DB_Ctrl_dev_H3K27me3_P39_vs_E14_up_530|8.61|6.97|1.64	0	.
chr13	112099799	112141599	DB_Ctrl_dev_H3K27me3_P39_vs_E14_up_532|9.2|8|1.19	0	.
chr2	22166799	22181999	DB_Ctrl_dev_H3K27me3_P39_vs_E14_up_541|7.59|5.43|2.16	0	.
chr13	111816999	111844599	DB_Ctrl_dev_H3K27me3_P39_vs_E14_up_547|8.45|7.11|1.34	0	.
chr7	115562399	115572199	DB_Ctrl_dev_H3K27me3_P39_vs_E14_up_558|6.97|4.27|2.71	0	.
chr10	92577999	92614799	DB_Ctrl_dev_H3K27me3_P39_vs_E14_up_559|8.45|7.03|1.41	0	.
chr4	64598999	64612999	DB_Ctrl_dev_H3K27me3_P39_vs_E14_up_570|7.57|5.59|1.98	0	.
chr5	37640599	37657599	DB_Ctrl_dev_H3K27me3_P39_vs_E14_up_572|7.67|5.67|2.01	0	.
chr6	141388199	141403799	DB_Ctrl_dev_H3K27me3_P39_vs_E14_up_581|7.2|4.89|2.3	0	.
chr14	34159599	34170799	DB_Ctrl_dev_H3K27me3_P39_vs_E14_up_584|7.33|5.01|2.32	0	.
chr14	101555199	101564999	DB_Ctrl_dev_H3K27me3_P39_vs_E14_up_585|7.02|4.41|2.6	0	.
chr7	116009399	116047199	DB_Ctrl_dev_H3K27me3_P39_vs_E14_up_587|9.03|7.94|1.09	0	.
chr9	89566399	89585799	DB_Ctrl_dev_H3K27me3_P39_vs_E14_up_594|7.2|4.76|2.44	0	.
chr2	137625399	137638799	DB_Ctrl_dev_H3K27me3_P39_vs_E14_up_595|7.29|5.13|2.16	0	.
chr2	158999199	159012399	DB_Ctrl_dev_H3K27me3_P39_vs_E14_up_616|6.59|3.34|3.24	0	.
chr4	63271599	63289999	DB_Ctrl_dev_H3K27me3_P39_vs_E14_up_630|7.73|5.97|1.76	0	.
chr4	64622999	64639199	DB_Ctrl_dev_H3K27me3_P39_vs_E14_up_640|7.4|4.95|2.45	0	.
chr13	111855399	111885199	DB_Ctrl_dev_H3K27me3_P39_vs_E14_up_646|8.2|6.79|1.41	0	.
chr6	97493999	97518199	DB_Ctrl_dev_H3K27me3_P39_vs_E14_up_654|8.02|6.24|1.77	0	.
chr1	167881999	167895999	DB_Ctrl_dev_H3K27me3_P39_vs_E14_up_663|7.64|5.66|1.98	0	.
chr4	63238199	63270799	DB_Ctrl_dev_H3K27me3_P39_vs_E14_up_664|8.56|7.31|1.25	0	.
chr6	97548199	97559199	DB_Ctrl_dev_H3K27me3_P39_vs_E14_up_691|6.82|4.18|2.64	0	.
chr16	87567599	87577399	DB_Ctrl_dev_H3K27me3_P39_vs_E14_up_694|6.66|3.87|2.8	0	.
chr2	146051999	146078199	DB_Ctrl_dev_H3K27me3_P39_vs_E14_up_707|8.01|6.56|1.46	0	.
chr12	47598999	47615599	DB_Ctrl_dev_H3K27me3_P39_vs_E14_up_712|7.39|5.28|2.11	0	.
chr16	43621799	43636399	DB_Ctrl_dev_H3K27me3_P39_vs_E14_up_724|7.57|5.64|1.93	0	.
chr11	33909599	33930199	DB_Ctrl_dev_H3K27me3_P39_vs_E14_up_732|7.86|6.3|1.56	0	.
chr2	22145999	22158199	DB_Ctrl_dev_H3K27me3_P39_vs_E14_up_734|7.35|5.09|2.27	0	.
chr7	115822599	115837799	DB_Ctrl_dev_H3K27me3_P39_vs_E14_up_735|7.76|6.18|1.58	0	.
chr8	81389399	81407599	DB_Ctrl_dev_H3K27me3_P39_vs_E14_up_743|7.36|5.39|1.98	0	.
chr16	88379599	88389199	DB_Ctrl_dev_H3K27me3_P39_vs_E14_up_747|6.83|4.28|2.55	0	.
chr8	89557999	89577799	DB_Ctrl_dev_H3K27me3_P39_vs_E14_up_754|8.06|6.6|1.46	0	.
chr8	53193599	53203999	DB_Ctrl_dev_H3K27me3_P39_vs_E14_up_799|6.64|3.86|2.78	0	.
chr3	31736199	31746999	DB_Ctrl_dev_H3K27me3_P39_vs_E14_up_814|7.17|4.72|2.45	0	.
chr8	89002399	89018199	DB_Ctrl_dev_H3K27me3_P39_vs_E14_up_816|7.85|6.2|1.65	0	.
chr1	150818999	150834999	DB_Ctrl_dev_H3K27me3_P39_vs_E14_up_818|6.7|3.66|3.04	0	.
chr3	84731799	84745399	DB_Ctrl_dev_H3K27me3_P39_vs_E14_up_822|7.27|5.27|2	0	.
chr10	87215199	87223799	DB_Ctrl_dev_H3K27me3_P39_vs_E14_up_825|6.37|2.87|3.5	0	.
chr2	118244599	118260599	DB_Ctrl_dev_H3K27me3_P39_vs_E14_up_846|7.48|5.26|2.22	0	.
chr7	115684999	115696399	DB_Ctrl_dev_H3K27me3_P39_vs_E14_up_850|7.15|4.72|2.43	0	.
chr10	85589399	85608399	DB_Ctrl_dev_H3K27me3_P39_vs_E14_up_859|7.64|5.87|1.78	0	.
chr12	105256599	105288399	DB_Ctrl_dev_H3K27me3_P39_vs_E14_up_864|8.35|6.98|1.37	0	.
chr13	112282599	112295799	DB_Ctrl_dev_H3K27me3_P39_vs_E14_up_865|7.16|5.17|2	0	.
chr10	85609199	85626999	DB_Ctrl_dev_H3K27me3_P39_vs_E14_up_868|7.66|5.7|1.96	0	.
chr7	51820399	51830999	DB_Ctrl_dev_H3K27me3_P39_vs_E14_up_881|7.01|4.85|2.16	0	.
chr5	91901799	91912799	DB_Ctrl_dev_H3K27me3_P39_vs_E14_up_891|6.72|4.13|2.59	0	.
chr11	39729199	39742599	DB_Ctrl_dev_H3K27me3_P39_vs_E14_up_897|7.33|5.41|1.92	0	.
chr6	97566399	97580399	DB_Ctrl_dev_H3K27me3_P39_vs_E14_up_905|6.76|4.16|2.6	0	.
chr11	76385999	76400599	DB_Ctrl_dev_H3K27me3_P39_vs_E14_up_918|7.48|5.81|1.67	0	.
chr2	169415199	169434399	DB_Ctrl_dev_H3K27me3_P39_vs_E14_up_925|7.96|6.6|1.36	0	.
chr5	26927199	26944999	DB_Ctrl_dev_H3K27me3_P39_vs_E14_up_926|7.77|6.21|1.55	0	.
chr11	44968199	44996599	DB_Ctrl_dev_H3K27me3_P39_vs_E14_up_935|8.07|6.55|1.52	0	.
chr15	8783199	8795799	DB_Ctrl_dev_H3K27me3_P39_vs_E14_up_946|6.76|4.43|2.33	0	.
chr11	101476399	101483799	DB_Ctrl_dev_H3K27me3_P39_vs_E14_up_957|6.69|4.01|2.68	0	.
chr11	76326399	76344599	DB_Ctrl_dev_H3K27me3_P39_vs_E14_up_958|7.5|5.87|1.63	0	.
chr8	114687399	114710999	DB_Ctrl_dev_H3K27me3_P39_vs_E14_up_963|7.69|5.85|1.84	0	.
chr8	114585999	114610599	DB_Ctrl_dev_H3K27me3_P39_vs_E14_up_964|8.25|7.01|1.24	0	.
chr1	129198399	129208399	DB_Ctrl_dev_H3K27me3_P39_vs_E14_up_977|6.91|4.64|2.27	0	.
chr5	110937599	110949599	DB_Ctrl_dev_H3K27me3_P39_vs_E14_up_982|6.92|4.59|2.33	0	.
chr1	167752999	167766999	DB_Ctrl_dev_H3K27me3_P39_vs_E14_up_984|7.2|5.22|1.98	0	.
chr18	13822399	13840399	DB_Ctrl_dev_H3K27me3_P39_vs_E14_up_987|7.2|5.36|1.84	0	.
chr2	26024599	26058799	DB_Ctrl_dev_H3K27me3_P39_vs_E14_up_1006|8.91|7.94|0.97	0	.
chr9	89661799	89677199	DB_Ctrl_dev_H3K27me3_P39_vs_E14_up_1013|7.12|5.15|1.98	0	.
chr17	7803399	7813999	DB_Ctrl_dev_H3K27me3_P39_vs_E14_up_1015|7.06|5.07|1.99	0	.
chr4	12606599	12618199	DB_Ctrl_dev_H3K27me3_P39_vs_E14_up_1016|6.85|4.54|2.31	0	.
chr3	130942199	130948999	DB_Ctrl_dev_H3K27me3_P39_vs_E14_up_1020|6.37|3.59|2.78	0	.
chr4	7953599	7969799	DB_Ctrl_dev_H3K27me3_P39_vs_E14_up_1024|7.53|5.92|1.61	0	.
chr5	37658599	37670199	DB_Ctrl_dev_H3K27me3_P39_vs_E14_up_1043|7.36|5.48|1.88	0	.
chr2	169435199	169452399	DB_Ctrl_dev_H3K27me3_P39_vs_E14_up_1055|7.53|5.94|1.59	0	.
chr11	44618199	44658399	DB_Ctrl_dev_H3K27me3_P39_vs_E14_up_1056|9.26|8.37|0.89	0	.
chr6	145673599	145691999	DB_Ctrl_dev_H3K27me3_P39_vs_E14_up_1066|7.68|6.01|1.66	0	.
chr6	51064399	51068599	DB_Ctrl_dev_H3K27me3_P39_vs_E14_up_1069|5.93|1.88|4.04	0	.
chr3	127638199	127648199	DB_Ctrl_dev_H3K27me3_P39_vs_E14_up_1075|7.16|5.22|1.94	0	.
chr10	120460799	120470199	DB_Ctrl_dev_H3K27me3_P39_vs_E14_up_1077|6.73|4.42|2.3	0	.
chr1	105493399	105503199	DB_Ctrl_dev_H3K27me3_P39_vs_E14_up_1084|6.88|4.36|2.51	0	.
chr4	91590199	91601799	DB_Ctrl_dev_H3K27me3_P39_vs_E14_up_1087|6.73|4.36|2.37	0	.
chr15	65479599	65486799	DB_Ctrl_dev_H3K27me3_P39_vs_E14_up_1091|6.15|3.04|3.11	0	.
chr10	19468199	19473399	DB_Ctrl_dev_H3K27me3_P39_vs_E14_up_1097|5.93|2.15|3.78	0	.
chr11	33752199	33758799	DB_Ctrl_dev_H3K27me3_P39_vs_E14_up_1103|6.07|2.13|3.93	0	.
chr2	172726599	172735999	DB_Ctrl_dev_H3K27me3_P39_vs_E14_up_1108|7.65|6.16|1.5	0	.
chr12	105307599	105327999	DB_Ctrl_dev_H3K27me3_P39_vs_E14_up_1115|7.75|6.31|1.44	0	.
chr11	18401399	18412799	DB_Ctrl_dev_H3K27me3_P39_vs_E14_up_1120|6.89|4.7|2.18	0	.
chr18	53492399	53502999	DB_Ctrl_dev_H3K27me3_P39_vs_E14_up_1121|6.68|4.31|2.37	0	.
chr3	31721799	31735199	DB_Ctrl_dev_H3K27me3_P39_vs_E14_up_1122|7|4.74|2.27	0	.
chr11	44877599	44914199	DB_Ctrl_dev_H3K27me3_P39_vs_E14_up_1130|8.57|7.25|1.32	0	.
chr18	81503999	81515799	DB_Ctrl_dev_H3K27me3_P39_vs_E14_up_1138|7.41|5.79|1.62	0	.
chr13	47944999	47952999	DB_Ctrl_dev_H3K27me3_P39_vs_E14_up_1151|6.29|3.55|2.74	0	.
chr11	88266399	88278799	DB_Ctrl_dev_H3K27me3_P39_vs_E14_up_1162|7.23|5.5|1.73	0	.
chr13	112024799	112039799	DB_Ctrl_dev_H3K27me3_P39_vs_E14_up_1163|7.38|5.7|1.68	0	.
chr7	37647799	37662199	DB_Ctrl_dev_H3K27me3_P39_vs_E14_up_1164|7.18|5.25|1.93	0	.
chr13	56462399	56481599	DB_Ctrl_dev_H3K27me3_P39_vs_E14_up_1166|7.54|6|1.54	0	.
chr14	100449799	100456399	DB_Ctrl_dev_H3K27me3_P39_vs_E14_up_1170|5.84|1.5|4.34	0	.
chr16	88189399	88197199	DB_Ctrl_dev_H3K27me3_P39_vs_E14_up_1173|5.95|2.31|3.64	0	.
chr2	56317199	56323999	DB_Ctrl_dev_H3K27me3_P39_vs_E14_up_1183|6.37|3.71|2.66	0	.
chr11	75871799	75880199	DB_Ctrl_dev_H3K27me3_P39_vs_E14_up_1189|6.66|4.34|2.32	0	.
chr3	83580999	83591399	DB_Ctrl_dev_H3K27me3_P39_vs_E14_up_1198|6.54|4.16|2.38	0	.
chr18	83581999	83612799	DB_Ctrl_dev_H3K27me3_P39_vs_E14_up_1210|8.21|7.02|1.19	0	.
chr8	89313599	89331199	DB_Ctrl_dev_H3K27me3_P39_vs_E14_up_1214|7.77|6.31|1.46	0	.
chr5	102332799	102339599	DB_Ctrl_dev_H3K27me3_P39_vs_E14_up_1224|6.13|3.15|2.99	0	.
chr1	119046399	119059399	DB_Ctrl_dev_H3K27me3_P39_vs_E14_up_1229|7.2|5.45|1.75	0	.
chr14	101499199	101505199	DB_Ctrl_dev_H3K27me3_P39_vs_E14_up_1231|6.41|3.91|2.5	0	.
chr4	31583199	31589799	DB_Ctrl_dev_H3K27me3_P39_vs_E14_up_1234|5.78|1.28|4.5	0	.
chr10	26561599	26568599	DB_Ctrl_dev_H3K27me3_P39_vs_E14_up_1248|5.78|1.28|4.5	0	.
chr18	83520199	83527999	DB_Ctrl_dev_H3K27me3_P39_vs_E14_up_1252|6.46|3.84|2.62	0	.
chr16	86512999	86520599	DB_Ctrl_dev_H3K27me3_P39_vs_E14_up_1253|5.79|1.5|4.29	0	.
chr18	57128999	57137199	DB_Ctrl_dev_H3K27me3_P39_vs_E14_up_1262|6.48|3.88|2.6	0	.
chr1	6845999	6851799	DB_Ctrl_dev_H3K27me3_P39_vs_E14_up_1272|5.77|0.72|5.04	0	.
chr9	77556999	77572599	DB_Ctrl_dev_H3K27me3_P39_vs_E14_up_1277|7.38|5.77|1.6	0	.
chr2	51080999	51093399	DB_Ctrl_dev_H3K27me3_P39_vs_E14_up_1284|6.87|4.81|2.07	0	.
chr9	116884799	116890399	DB_Ctrl_dev_H3K27me3_P39_vs_E14_up_1287|5.9|2.44|3.46	0	.
chr1	130297599	130307199	DB_Ctrl_dev_H3K27me3_P39_vs_E14_up_1288|6.65|4.44|2.21	0	.
chr6	137104799	137112199	DB_Ctrl_dev_H3K27me3_P39_vs_E14_up_1290|6.78|4.69|2.09	0	.
chr4	109104999	109119399	DB_Ctrl_dev_H3K27me3_P39_vs_E14_up_1291|7.22|5.47|1.75	0	.
chr8	127085399	127105599	DB_Ctrl_dev_H3K27me3_P39_vs_E14_up_1306|7.36|5.78|1.59	0	.
chr18	13841199	13854599	DB_Ctrl_dev_H3K27me3_P39_vs_E14_up_1335|7.18|5.44|1.74	0	.
chr1	190219199	190242799	DB_Ctrl_dev_H3K27me3_P39_vs_E14_up_1336|8.07|6.89|1.17	0	.
chr11	44914799	44934199	DB_Ctrl_dev_H3K27me3_P39_vs_E14_up_1340|7.6|6.16|1.44	0	.
chr6	22203599	22206999	DB_Ctrl_dev_H3K27me3_P39_vs_E14_up_1352|5.77|1.98|3.78	0	.
chr11	18383999	18390799	DB_Ctrl_dev_H3K27me3_P39_vs_E14_up_1355|5.78|1.5|4.28	0	.
chr11	18009599	18015599	DB_Ctrl_dev_H3K27me3_P39_vs_E14_up_1358|6.42|4|2.42	0	.
chr9	77402799	77418399	DB_Ctrl_dev_H3K27me3_P39_vs_E14_up_1366|6.97|5.11|1.86	0	.
chr4	8893399	8900199	DB_Ctrl_dev_H3K27me3_P39_vs_E14_up_1368|5.7|1.03|4.67	0	.
chr15	8705799	8711799	DB_Ctrl_dev_H3K27me3_P39_vs_E14_up_1369|6.34|3.69|2.66	0	.
chr18	13699999	13719999	DB_Ctrl_dev_H3K27me3_P39_vs_E14_up_1386|8.13|7|1.13	0	.
chr3	116121399	116131199	DB_Ctrl_dev_H3K27me3_P39_vs_E14_up_1393|6.65|4.55|2.11	0	.
chr4	135417399	135425599	DB_Ctrl_dev_H3K27me3_P39_vs_E14_up_1396|6.73|4.66|2.07	0	.
chr2	64387199	64396399	DB_Ctrl_dev_H3K27me3_P39_vs_E14_up_1399|6.48|4.18|2.29	0	.
chr4	91580199	91589399	DB_Ctrl_dev_H3K27me3_P39_vs_E14_up_1405|6.4|3.97|2.43	0	.
chr8	53633199	53639199	DB_Ctrl_dev_H3K27me3_P39_vs_E14_up_1410|6|2.77|3.23	0	.
chr6	146300599	146315799	DB_Ctrl_dev_H3K27me3_P39_vs_E14_up_1417|7.12|5.16|1.96	0	.
chr8	108231399	108242399	DB_Ctrl_dev_H3K27me3_P39_vs_E14_up_1418|7.03|5.19|1.85	0	.
chr5	96964399	96975799	DB_Ctrl_dev_H3K27me3_P39_vs_E14_up_1429|6.72|4.58|2.14	0	.
chr18	52819599	52827799	DB_Ctrl_dev_H3K27me3_P39_vs_E14_up_1431|6.01|3.09|2.92	0	.
chr2	118199999	118206799	DB_Ctrl_dev_H3K27me3_P39_vs_E14_up_1432|5.93|2.57|3.36	0	.
chr9	117184399	117191999	DB_Ctrl_dev_H3K27me3_P39_vs_E14_up_1433|6.59|4.4|2.19	0	.
chr15	87093999	87098999	DB_Ctrl_dev_H3K27me3_P39_vs_E14_up_1438|5.99|2.9|3.08	0	.
chr3	30496199	30502999	DB_Ctrl_dev_H3K27me3_P39_vs_E14_up_1446|5.98|2.59|3.39	0	.
chr18	52908199	52916599	DB_Ctrl_dev_H3K27me3_P39_vs_E14_up_1453|5.85|2.13|3.72	0	.
chr17	72499999	72508999	DB_Ctrl_dev_H3K27me3_P39_vs_E14_up_1464|6.16|3.45|2.7	0	.
chr1	69045599	69053799	DB_Ctrl_dev_H3K27me3_P39_vs_E14_up_1470|6.06|3.22|2.84	0	.
chr1	186886999	186901999	DB_Ctrl_dev_H3K27me3_P39_vs_E14_up_1476|7.42|5.91|1.5	0	.
chr6	145666199	145672799	DB_Ctrl_dev_H3K27me3_P39_vs_E14_up_1481|6.21|3.44|2.77	0	.
chr6	145698599	145712199	DB_Ctrl_dev_H3K27me3_P39_vs_E14_up_1482|7.01|5|2.01	0	.
chr18	13872399	13877799	DB_Ctrl_dev_H3K27me3_P39_vs_E14_up_1484|6.03|3.19|2.83	0	.
chr9	118316199	118321599	DB_Ctrl_dev_H3K27me3_P39_vs_E14_up_1491|5.78|2.33|3.45	0	.
chr8	26296799	26302399	DB_Ctrl_dev_H3K27me3_P39_vs_E14_up_1501|5.62|1.03|4.59	0	.
chr13	48158199	48162799	DB_Ctrl_dev_H3K27me3_P39_vs_E14_up_1504|6.24|3.41|2.84	0	.
chr1	186133599	186154399	DB_Ctrl_dev_H3K27me3_P39_vs_E14_up_1506|7.65|6.3|1.35	0	.
chr3	102020799	102025199	DB_Ctrl_dev_H3K27me3_P39_vs_E14_up_1507|5.94|2.95|2.99	0	.
chr18	13806799	13815199	DB_Ctrl_dev_H3K27me3_P39_vs_E14_up_1509|6.74|4.75|1.99	0	.
chr13	112142399	112150199	DB_Ctrl_dev_H3K27me3_P39_vs_E14_up_1537|6.71|4.75|1.96	0	.
chr11	33768999	33773799	DB_Ctrl_dev_H3K27me3_P39_vs_E14_up_1542|5.61|1.28|4.33	0	.
chr4	94138199	94142799	DB_Ctrl_dev_H3K27me3_P39_vs_E14_up_1548|5.63|1.76|3.87	0	.
chr13	114595599	114604799	DB_Ctrl_dev_H3K27me3_P39_vs_E14_up_1558|6.77|4.88|1.89	0	.
chr1	188721999	188730999	DB_Ctrl_dev_H3K27me3_P39_vs_E14_up_1562|6.87|5.09|1.79	0	.
chr7	115577399	115588399	DB_Ctrl_dev_H3K27me3_P39_vs_E14_up_1576|6.82|5|1.82	0	.
chr6	130869799	130876199	DB_Ctrl_dev_H3K27me3_P39_vs_E14_up_1577|5.81|-0.2|6.01	0	.
chr18	74554799	74562999	DB_Ctrl_dev_H3K27me3_P39_vs_E14_up_1580|6.64|4.5|2.14	0	.
chr10	120817799	120833999	DB_Ctrl_dev_H3K27me3_P39_vs_E14_up_1583|7.52|6.2|1.33	0	.
chr11	45022799	45028399	DB_Ctrl_dev_H3K27me3_P39_vs_E14_up_1586|6.31|3.93|2.38	0	.
chr8	89437199	89443199	DB_Ctrl_dev_H3K27me3_P39_vs_E14_up_1588|5.8|-0.2|6	0	.
chr9	58791999	58815399	DB_Ctrl_dev_H3K27me3_P39_vs_E14_up_1600|7.99|6.73|1.26	0	.
chr6	53620799	53632599	DB_Ctrl_dev_H3K27me3_P39_vs_E14_up_1603|6.84|5.05|1.79	0	.
chr9	116779599	116820799	DB_Ctrl_dev_H3K27me3_P39_vs_E14_up_1607|9.15|8.36|0.8	0	.
chr13	56682399	56697999	DB_Ctrl_dev_H3K27me3_P39_vs_E14_up_1611|7.58|6.29|1.29	0	.
chr7	136810399	136837799	DB_Ctrl_dev_H3K27me3_P39_vs_E14_up_1613|8.28|7.25|1.04	0	.
chr8	40252399	40260599	DB_Ctrl_dev_H3K27me3_P39_vs_E14_up_1614|5.54|1.03|4.51	0	.
chr1	167797599	167808799	DB_Ctrl_dev_H3K27me3_P39_vs_E14_up_1616|6.86|4.98|1.88	0	.
chr2	113987799	114002199	DB_Ctrl_dev_H3K27me3_P39_vs_E14_up_1617|7.23|5.58|1.66	0	.
chr7	115606399	115618999	DB_Ctrl_dev_H3K27me3_P39_vs_E14_up_1622|6.93|5.23|1.71	0	.
chr4	89684999	89695399	DB_Ctrl_dev_H3K27me3_P39_vs_E14_up_1623|7.08|5.42|1.66	0	.
chr15	32043199	32052599	DB_Ctrl_dev_H3K27me3_P39_vs_E14_up_1628|6.64|4.6|2.04	0	.
chr7	115619799	115629999	DB_Ctrl_dev_H3K27me3_P39_vs_E14_up_1630|6.73|4.76|1.97	0	.
chr6	146218999	146234799	DB_Ctrl_dev_H3K27me3_P39_vs_E14_up_1633|7.27|5.76|1.52	0	.
chr13	8202799	8209199	DB_Ctrl_dev_H3K27me3_P39_vs_E14_up_1637|6.54|4.47|2.07	0	.
chr9	98496999	98502199	DB_Ctrl_dev_H3K27me3_P39_vs_E14_up_1638|5.98|3.15|2.82	0	.
chr3	129163199	129166999	DB_Ctrl_dev_H3K27me3_P39_vs_E14_up_1646|5.56|0.33|5.22	0	.
chr15	94459799	94464199	DB_Ctrl_dev_H3K27me3_P39_vs_E14_up_1648|5.54|1.43|4.11	0	.
chr18	52784999	52794999	DB_Ctrl_dev_H3K27me3_P39_vs_E14_up_1650|6.71|4.67|2.04	0	.
chr13	39648199	39651599	DB_Ctrl_dev_H3K27me3_P39_vs_E14_up_1659|5.53|1.03|4.5	0	.
chr19	48899199	48906799	DB_Ctrl_dev_H3K27me3_P39_vs_E14_up_1661|5.57|1.03|4.54	0	.
chr8	89301199	89312799	DB_Ctrl_dev_H3K27me3_P39_vs_E14_up_1667|7.12|5.51|1.61	0	.
chr3	35329999	35334199	DB_Ctrl_dev_H3K27me3_P39_vs_E14_up_1668|5.54|1.58|3.96	0	.
chr4	64613999	64622199	DB_Ctrl_dev_H3K27me3_P39_vs_E14_up_1669|6.18|3.47|2.71	0	.
chr18	13855399	13866199	DB_Ctrl_dev_H3K27me3_P39_vs_E14_up_1671|6.71|4.84|1.87	0	.
chr5	19192599	19201799	DB_Ctrl_dev_H3K27me3_P39_vs_E14_up_1680|6.13|3.36|2.77	0	.
chr17	9642199	9646199	DB_Ctrl_dev_H3K27me3_P39_vs_E14_up_1695|5.51|1.33|4.18	0	.
chr14	98880399	98892399	DB_Ctrl_dev_H3K27me3_P39_vs_E14_up_1696|6.67|4.62|2.05	0	.
chr9	116861199	116872399	DB_Ctrl_dev_H3K27me3_P39_vs_E14_up_1701|7.04|5.4|1.64	0	.
chr1	6759399	6763199	DB_Ctrl_dev_H3K27me3_P39_vs_E14_up_1707|5.61|1.69|3.93	0	.
chr1	61437599	61444199	DB_Ctrl_dev_H3K27me3_P39_vs_E14_up_1713|5.89|2.99|2.9	0	.
chr16	88275999	88280799	DB_Ctrl_dev_H3K27me3_P39_vs_E14_up_1714|5.58|1.92|3.67	0	.
chr13	112235999	112246399	DB_Ctrl_dev_H3K27me3_P39_vs_E14_up_1717|7.11|5.47|1.64	0	.
chr8	94946399	94955999	DB_Ctrl_dev_H3K27me3_P39_vs_E14_up_1719|7.12|5.56|1.56	0	.
chr3	84769399	84783999	DB_Ctrl_dev_H3K27me3_P39_vs_E14_up_1720|7.15|5.6|1.55	0	.
chr9	47019599	47033399	DB_Ctrl_dev_H3K27me3_P39_vs_E14_up_1729|6.54|4.48|2.06	0	.
chr13	26942599	26949799	DB_Ctrl_dev_H3K27me3_P39_vs_E14_up_1736|5.98|3.04|2.93	0	.
chr1	167737399	167748999	DB_Ctrl_dev_H3K27me3_P39_vs_E14_up_1739|7.05|5.46|1.58	0	.
chr8	40184399	40192599	DB_Ctrl_dev_H3K27me3_P39_vs_E14_up_1740|6.34|4.12|2.22	0	.
chr13	107644199	107647999	DB_Ctrl_dev_H3K27me3_P39_vs_E14_up_1751|5.6|1.69|3.92	0	.
chr11	33987799	34000999	DB_Ctrl_dev_H3K27me3_P39_vs_E14_up_1753|7.42|6.07|1.35	0	.
chr5	51412599	51425199	DB_Ctrl_dev_H3K27me3_P39_vs_E14_up_1756|6.66|4.54|2.11	0	.
chr3	102170999	102176999	DB_Ctrl_dev_H3K27me3_P39_vs_E14_up_1761|6.17|3.76|2.41	0	.
chr1	167710199	167722999	DB_Ctrl_dev_H3K27me3_P39_vs_E14_up_1763|6.81|5.01|1.8	0	.
chr14	98893399	98897399	DB_Ctrl_dev_H3K27me3_P39_vs_E14_up_1766|5.65|2.04|3.6	0	.
chr3	102143399	102152399	DB_Ctrl_dev_H3K27me3_P39_vs_E14_up_1770|6.32|4.08|2.24	0	.
chr6	56358599	56364399	DB_Ctrl_dev_H3K27me3_P39_vs_E14_up_1781|6.45|4.39|2.07	0	.
chr9	117010999	117026199	DB_Ctrl_dev_H3K27me3_P39_vs_E14_up_1782|7.03|5.04|2	0	.
chr5	38808199	38815399	DB_Ctrl_dev_H3K27me3_P39_vs_E14_up_1785|6.13|3.74|2.4	0	.
chr10	92161399	92173399	DB_Ctrl_dev_H3K27me3_P39_vs_E14_up_1787|7.13|5.54|1.59	0	.
chr17	73688599	73703199	DB_Ctrl_dev_H3K27me3_P39_vs_E14_up_1794|7.26|5.76|1.5	0	.
chr1	41227199	41235399	DB_Ctrl_dev_H3K27me3_P39_vs_E14_up_1798|6.05|3.3|2.76	0	.
chr2	160500799	160517999	DB_Ctrl_dev_H3K27me3_P39_vs_E14_up_1800|7.6|6.34|1.26	0	.
chr2	169738199	169747599	DB_Ctrl_dev_H3K27me3_P39_vs_E14_up_1805|6.46|4.37|2.09	0	.
chr11	71985799	71992999	DB_Ctrl_dev_H3K27me3_P39_vs_E14_up_1807|5.93|3.23|2.7	0	.
chr7	115966599	115977399	DB_Ctrl_dev_H3K27me3_P39_vs_E14_up_1812|7.29|5.91|1.38	0	.
chr1	184258999	184271599	DB_Ctrl_dev_H3K27me3_P39_vs_E14_up_1813|7.05|5.39|1.66	0	.
chr1	133489599	133494399	DB_Ctrl_dev_H3K27me3_P39_vs_E14_up_1821|5.68|1.85|3.83	0	.
chr1	126828599	126834399	DB_Ctrl_dev_H3K27me3_P39_vs_E14_up_1825|5.96|3.34|2.62	0	.
chr1	61102399	61117199	DB_Ctrl_dev_H3K27me3_P39_vs_E14_up_1826|7.13|5.52|1.61	0	.
chr10	85541199	85562799	DB_Ctrl_dev_H3K27me3_P39_vs_E14_up_1827|7.53|6.25|1.29	0	.
chr2	106078599	106088599	DB_Ctrl_dev_H3K27me3_P39_vs_E14_up_1828|6.74|4.95|1.79	0	.
chr2	159971799	159980199	DB_Ctrl_dev_H3K27me3_P39_vs_E14_up_1829|5.99|3.33|2.65	0	.
chr4	135426599	135442199	DB_Ctrl_dev_H3K27me3_P39_vs_E14_up_1833|7.7|6.51|1.18	0	.
chr10	19475999	19491199	DB_Ctrl_dev_H3K27me3_P39_vs_E14_up_1838|7.25|5.82|1.43	0	.
chr4	45753399	45757399	DB_Ctrl_dev_H3K27me3_P39_vs_E14_up_1848|5.41|0.72|4.69	0	.
chr8	89594999	89605199	DB_Ctrl_dev_H3K27me3_P39_vs_E14_up_1855|6.33|4.15|2.18	0	.
chr11	76373599	76385199	DB_Ctrl_dev_H3K27me3_P39_vs_E14_up_1860|6.96|5.24|1.72	0	.
chr18	42428399	42434999	DB_Ctrl_dev_H3K27me3_P39_vs_E14_up_1865|6.28|4.09|2.19	0	.
chr1	61452999	61459399	DB_Ctrl_dev_H3K27me3_P39_vs_E14_up_1869|5.67|2.13|3.54	0	.
chr6	140804599	140812999	DB_Ctrl_dev_H3K27me3_P39_vs_E14_up_1876|6.59|4.66|1.92	0	.
chr7	133222799	133227599	DB_Ctrl_dev_H3K27me3_P39_vs_E14_up_1878|5.74|2.76|2.98	0	.
chr9	41912599	41919999	DB_Ctrl_dev_H3K27me3_P39_vs_E14_up_1880|5.73|2.78|2.95	0	.
chr9	77533599	77544399	DB_Ctrl_dev_H3K27me3_P39_vs_E14_up_1882|6.74|5|1.74	0	.
chr2	165647199	165662799	DB_Ctrl_dev_H3K27me3_P39_vs_E14_up_1887|7.2|5.72|1.48	0	.
chr7	97451799	97455999	DB_Ctrl_dev_H3K27me3_P39_vs_E14_up_1894|6.09|3.55|2.53	0	.
chr14	34144199	34157799	DB_Ctrl_dev_H3K27me3_P39_vs_E14_up_1912|7.57|6.32|1.25	0	.
chr6	140741599	140756199	DB_Ctrl_dev_H3K27me3_P39_vs_E14_up_1913|6.97|5.41|1.56	0	.
chr16	88410999	88421799	DB_Ctrl_dev_H3K27me3_P39_vs_E14_up_1931|6.9|5.19|1.71	0	.
chr11	44821999	44856799	DB_Ctrl_dev_H3K27me3_P39_vs_E14_up_1932|8.54|7.69|0.84	0	.
chr12	118582399	118590999	DB_Ctrl_dev_H3K27me3_P39_vs_E14_up_1935|6.76|4.89|1.87	0	.
chr8	89396199	89404599	DB_Ctrl_dev_H3K27me3_P39_vs_E14_up_1939|6.36|4.3|2.06	0	.
chr13	56482399	56486599	DB_Ctrl_dev_H3K27me3_P39_vs_E14_up_1940|5.54|2.15|3.39	0	.
chr1	105509999	105517399	DB_Ctrl_dev_H3K27me3_P39_vs_E14_up_1944|6.49|4.52|1.98	0	.
chr10	56376999	56382199	DB_Ctrl_dev_H3K27me3_P39_vs_E14_up_1952|6.49|4.48|2.01	0	.
chr12	112409799	112418599	DB_Ctrl_dev_H3K27me3_P39_vs_E14_up_1953|6.8|5.09|1.71	0	.
chr2	116704199	116718399	DB_Ctrl_dev_H3K27me3_P39_vs_E14_up_1960|6.93|5.34|1.6	0	.
chr2	57856599	57862999	DB_Ctrl_dev_H3K27me3_P39_vs_E14_up_1968|5.87|3.22|2.65	0	.
chr16	88253799	88259199	DB_Ctrl_dev_H3K27me3_P39_vs_E14_up_1974|5.78|2.7|3.07	0	.
chr18	58640199	58648199	DB_Ctrl_dev_H3K27me3_P39_vs_E14_up_1975|6.21|3.66|2.55	0	.
chr4	135378399	135395399	DB_Ctrl_dev_H3K27me3_P39_vs_E14_up_1976|7.53|6.31|1.22	0	.
chr11	39713399	39720399	DB_Ctrl_dev_H3K27me3_P39_vs_E14_up_1978|6.17|3.82|2.35	0	.
chr13	112082399	112086999	DB_Ctrl_dev_H3K27me3_P39_vs_E14_up_1981|6.05|3.6|2.45	0	.
chr10	115655199	115666399	DB_Ctrl_dev_H3K27me3_P39_vs_E14_up_1983|6.95|5.33|1.62	0	.
chr11	44719799	44742399	DB_Ctrl_dev_H3K27me3_P39_vs_E14_up_1999|7.95|6.88|1.08	0	.
chr6	97453599	97467399	DB_Ctrl_dev_H3K27me3_P39_vs_E14_up_2006|7.16|5.63|1.53	0	.
chr1	190430599	190454999	DB_Ctrl_dev_H3K27me3_P39_vs_E14_up_2007|8.04|7.01|1.04	0	.
chr14	97953799	97960999	DB_Ctrl_dev_H3K27me3_P39_vs_E14_up_2008|5.54|1.9|3.64	0	.
chr2	118207799	118213999	DB_Ctrl_dev_H3K27me3_P39_vs_E14_up_2020|6.14|3.45|2.69	0	.
chr13	48039599	48047199	DB_Ctrl_dev_H3K27me3_P39_vs_E14_up_2028|6.17|3.95|2.22	0	.
chr2	135750399	135761399	DB_Ctrl_dev_H3K27me3_P39_vs_E14_up_2030|6.76|4.89|1.88	0	.
chr4	136133999	136135999	DB_Ctrl_dev_H3K27me3_P39_vs_E14_up_2035|5.59|2.16|3.43	0	.
chr5	26900199	26914199	DB_Ctrl_dev_H3K27me3_P39_vs_E14_up_2043|7.26|5.66|1.6	0	.
chr5	44095199	44106599	DB_Ctrl_dev_H3K27me3_P39_vs_E14_up_2048|7.36|6.07|1.29	0	.
chr10	60884999	60893799	DB_Ctrl_dev_H3K27me3_P39_vs_E14_up_2050|6.59|4.57|2.03	0	.
chr2	168761999	168771399	DB_Ctrl_dev_H3K27me3_P39_vs_E14_up_2059|7.29|5.92|1.37	0	.
chr3	130733999	130738799	DB_Ctrl_dev_H3K27me3_P39_vs_E14_up_2062|6.23|4.05|2.18	0	.
chr3	127746399	127753399	DB_Ctrl_dev_H3K27me3_P39_vs_E14_up_2067|6.31|3.94|2.37	0	.
chr5	112096999	112100599	DB_Ctrl_dev_H3K27me3_P39_vs_E14_up_2071|5.81|3.17|2.64	0	.
chr9	89277799	89288399	DB_Ctrl_dev_H3K27me3_P39_vs_E14_up_2076|6.48|4.54|1.94	0	.
chr1	188777199	188789399	DB_Ctrl_dev_H3K27me3_P39_vs_E14_up_2081|6.69|4.54|2.15	0	.
chr2	56451599	56459799	DB_Ctrl_dev_H3K27me3_P39_vs_E14_up_2089|6.59|4.57|2.02	0	.
chr11	18375999	18383199	DB_Ctrl_dev_H3K27me3_P39_vs_E14_up_2094|5.41|-0.2|5.62	0	.
chr11	45520799	45528999	DB_Ctrl_dev_H3K27me3_P39_vs_E14_up_2106|6.23|4.03|2.21	0	.
chr19	48916399	48922399	DB_Ctrl_dev_H3K27me3_P39_vs_E14_up_2108|5.95|3.55|2.4	0	.
chr13	111845399	111854599	DB_Ctrl_dev_H3K27me3_P39_vs_E14_up_2112|6.89|5.34|1.55	0	.
chr13	60120599	60130399	DB_Ctrl_dev_H3K27me3_P39_vs_E14_up_2114|6.81|5.2|1.61	0	.
chr16	87784799	87796599	DB_Ctrl_dev_H3K27me3_P39_vs_E14_up_2115|6.86|5.24|1.62	0	.
chr11	16626399	16629799	DB_Ctrl_dev_H3K27me3_P39_vs_E14_up_2121|5.39|-0.2|5.6	0	.
chr16	43637399	43640999	DB_Ctrl_dev_H3K27me3_P39_vs_E14_up_2125|5.61|2.54|3.07	0	.
chr11	101545399	101551199	DB_Ctrl_dev_H3K27me3_P39_vs_E14_up_2129|6.02|3.47|2.55	0	.
chr4	45744599	45749999	DB_Ctrl_dev_H3K27me3_P39_vs_E14_up_2140|5.46|2.09|3.37	0	.
chr15	101876199	101894599	DB_Ctrl_dev_H3K27me3_P39_vs_E14_up_2142|7.42|6.12|1.3	0	.
chr3	30204999	30228999	DB_Ctrl_dev_H3K27me3_P39_vs_E14_up_2143|8.01|6.83|1.19	0	.
chr8	9088799	9096999	DB_Ctrl_dev_H3K27me3_P39_vs_E14_up_2151|5.89|3.01|2.88	0	.
chr13	111781999	111794799	DB_Ctrl_dev_H3K27me3_P39_vs_E14_up_2161|7.52|6.3|1.22	0	.
chr5	96905599	96913999	DB_Ctrl_dev_H3K27me3_P39_vs_E14_up_2164|6.25|4.2|2.05	0	.
chr1	163522599	163536399	DB_Ctrl_dev_H3K27me3_P39_vs_E14_up_2165|6.87|5.23|1.64	0	.
chr9	13662599	13668999	DB_Ctrl_dev_H3K27me3_P39_vs_E14_up_2185|5.83|3.11|2.72	0	.
chr14	79787599	79794399	DB_Ctrl_dev_H3K27me3_P39_vs_E14_up_2187|5.36|-0.2|5.56	0	.
chr4	125894199	125908399	DB_Ctrl_dev_H3K27me3_P39_vs_E14_up_2193|6.96|5.48|1.48	0	.
chr1	89424999	89437799	DB_Ctrl_dev_H3K27me3_P39_vs_E14_up_2194|6.86|5.21|1.65	0	.
chr11	19156599	19163199	DB_Ctrl_dev_H3K27me3_P39_vs_E14_up_2196|6.12|3.96|2.16	0	.
chr1	61126399	61133599	DB_Ctrl_dev_H3K27me3_P39_vs_E14_up_2197|5.43|1.69|3.74	0	.
chr7	76048199	76053399	DB_Ctrl_dev_H3K27me3_P39_vs_E14_up_2198|6.1|3.93|2.18	0	.
chr2	172641799	172646399	DB_Ctrl_dev_H3K27me3_P39_vs_E14_up_2199|5.59|2.58|3	0	.
chr13	114605799	114616599	DB_Ctrl_dev_H3K27me3_P39_vs_E14_up_2204|6.79|5.11|1.68	0	.
chr10	19393999	19404999	DB_Ctrl_dev_H3K27me3_P39_vs_E14_up_2206|7.02|5.42|1.6	0	.
chr2	178681399	178689599	DB_Ctrl_dev_H3K27me3_P39_vs_E14_up_2208|5.61|2.13|3.48	0	.
chr7	115929399	115934399	DB_Ctrl_dev_H3K27me3_P39_vs_E14_up_2220|5.87|3.41|2.46	0	.
chr11	33733999	33741199	DB_Ctrl_dev_H3K27me3_P39_vs_E14_up_2222|6.21|4.13|2.08	0	.
chr19	14413399	14418199	DB_Ctrl_dev_H3K27me3_P39_vs_E14_up_2227|5.58|2.62|2.96	0	.
chr18	52850399	52854799	DB_Ctrl_dev_H3K27me3_P39_vs_E14_up_2229|6.05|3.81|2.24	0	.
chr8	125305799	125315999	DB_Ctrl_dev_H3K27me3_P39_vs_E14_up_2231|6.81|5.23|1.59	0	.
chr8	89540999	89557199	DB_Ctrl_dev_H3K27me3_P39_vs_E14_up_2235|7.42|6.17|1.25	0	.
chr15	8572599	8585799	DB_Ctrl_dev_H3K27me3_P39_vs_E14_up_2242|6.69|4.79|1.89	0	.
chr4	111838999	111847599	DB_Ctrl_dev_H3K27me3_P39_vs_E14_up_2246|6.29|4.23|2.06	0	.
chr11	39917799	39924799	DB_Ctrl_dev_H3K27me3_P39_vs_E14_up_2248|5.32|-0.2|5.53	0	.
chr10	87224599	87232999	DB_Ctrl_dev_H3K27me3_P39_vs_E14_up_2251|6.41|4.52|1.89	0	.
chr1	105421599	105426799	DB_Ctrl_dev_H3K27me3_P39_vs_E14_up_2257|5.84|3.1|2.75	0	.
chr9	116997999	117001399	DB_Ctrl_dev_H3K27me3_P39_vs_E14_up_2258|5.66|2.84|2.82	0	.
chr4	45652999	45656999	DB_Ctrl_dev_H3K27me3_P39_vs_E14_up_2262|5.51|2.29|3.21	0	.
chr13	47433199	47440999	DB_Ctrl_dev_H3K27me3_P39_vs_E14_up_2263|5.63|2.76|2.87	0	.
chr8	89686799	89710799	DB_Ctrl_dev_H3K27me3_P39_vs_E14_up_2264|7.73|6.55|1.18	0	.
chr6	22826199	22830599	DB_Ctrl_dev_H3K27me3_P39_vs_E14_up_2267|5.36|1.76|3.6	0	.
chr16	57465399	57478999	DB_Ctrl_dev_H3K27me3_P39_vs_E14_up_2268|6.95|5.22|1.73	0	.
chr5	141080799	141085599	DB_Ctrl_dev_H3K27me3_P39_vs_E14_up_2269|5.87|3.36|2.51	0	.
chr6	93065399	93070199	DB_Ctrl_dev_H3K27me3_P39_vs_E14_up_2270|5.23|0.33|4.9	0	.
chr1	138321999	138331199	DB_Ctrl_dev_H3K27me3_P39_vs_E14_up_2271|6.42|4.41|2.01	0	.
chr4	100060399	100066999	DB_Ctrl_dev_H3K27me3_P39_vs_E14_up_2276|5.9|3.55|2.36	0	.
chr13	15534799	15540399	DB_Ctrl_dev_H3K27me3_P39_vs_E14_up_2280|5.61|2.63|2.98	0	.
chr1	82638399	82654999	DB_Ctrl_dev_H3K27me3_P39_vs_E14_up_2282|7.22|5.91|1.31	0	.
chr10	39610599	39621599	DB_Ctrl_dev_H3K27me3_P39_vs_E14_up_2283|6.41|4.41|2	0	.
chr9	116821599	116828599	DB_Ctrl_dev_H3K27me3_P39_vs_E14_up_2287|6.41|4.56|1.85	0	.
chr18	81487399	81494599	DB_Ctrl_dev_H3K27me3_P39_vs_E14_up_2288|5.74|2.57|3.17	0	.
chr4	64544599	64549799	DB_Ctrl_dev_H3K27me3_P39_vs_E14_up_2289|5.64|2.37|3.27	0	.
chr6	146273199	146281199	DB_Ctrl_dev_H3K27me3_P39_vs_E14_up_2292|6.18|3.45|2.73	0	.
chr1	61176799	61182799	DB_Ctrl_dev_H3K27me3_P39_vs_E14_up_2293|5.43|2.06|3.37	0	.
chr9	97016599	97023199	DB_Ctrl_dev_H3K27me3_P39_vs_E14_up_2294|6.17|3.93|2.24	0	.
chr8	12516399	12525199	DB_Ctrl_dev_H3K27me3_P39_vs_E14_up_2298|6.26|4.21|2.05	0	.
chr13	103937399	103947199	DB_Ctrl_dev_H3K27me3_P39_vs_E14_up_2306|6.07|3.61|2.46	0	.
chr19	24677799	24687799	DB_Ctrl_dev_H3K27me3_P39_vs_E14_up_2308|6.76|5.19|1.57	0	.
chr18	81659799	81672799	DB_Ctrl_dev_H3K27me3_P39_vs_E14_up_2313|6.69|4.82|1.88	0	.
chr7	115105599	115118599	DB_Ctrl_dev_H3K27me3_P39_vs_E14_up_2315|6.75|5.16|1.59	0	.
chr8	89368799	89382799	DB_Ctrl_dev_H3K27me3_P39_vs_E14_up_2320|6.86|5.35|1.51	0	.
chr9	118431199	118437799	DB_Ctrl_dev_H3K27me3_P39_vs_E14_up_2321|5.87|3.31|2.56	0	.
chr10	92397199	92408999	DB_Ctrl_dev_H3K27me3_P39_vs_E14_up_2324|6.88|5.02|1.86	0	.
chr7	115536999	115549399	DB_Ctrl_dev_H3K27me3_P39_vs_E14_up_2329|6.44|4.6|1.84	0	.
chr1	121705199	121711799	DB_Ctrl_dev_H3K27me3_P39_vs_E14_up_2333|5.36|1.5|3.87	0	.
chr1	62281599	62289799	DB_Ctrl_dev_H3K27me3_P39_vs_E14_up_2334|6.15|4.1|2.06	0	.
chr18	74596799	74605399	DB_Ctrl_dev_H3K27me3_P39_vs_E14_up_2335|6.45|4.56|1.9	0	.
chr7	29288799	29295399	DB_Ctrl_dev_H3K27me3_P39_vs_E14_up_2337|6.2|4.18|2.01	0	.
chr16	50586199	50593999	DB_Ctrl_dev_H3K27me3_P39_vs_E14_up_2343|5.92|3.52|2.4	0	.
chr11	16600999	16606999	DB_Ctrl_dev_H3K27me3_P39_vs_E14_up_2344|5.27|-0.2|5.48	0	.
chr11	76253199	76270599	DB_Ctrl_dev_H3K27me3_P39_vs_E14_up_2345|7.19|5.74|1.45	0	.
chr14	34080799	34094599	DB_Ctrl_dev_H3K27me3_P39_vs_E14_up_2346|7.32|6.06|1.26	0	.
chr2	170396399	170432199	DB_Ctrl_dev_H3K27me3_P39_vs_E14_up_2351|8.22|7.27|0.95	0	.
chr11	44862999	44876399	DB_Ctrl_dev_H3K27me3_P39_vs_E14_up_2353|7.16|5.78|1.38	0	.
chr8	115727599	115735199	DB_Ctrl_dev_H3K27me3_P39_vs_E14_up_2354|6.25|4.27|1.98	0	.
chr11	91304399	91313399	DB_Ctrl_dev_H3K27me3_P39_vs_E14_up_2356|6.52|4.65|1.87	0	.
chr14	100438599	100443399	DB_Ctrl_dev_H3K27me3_P39_vs_E14_up_2363|5.53|2.13|3.39	0	.
chr9	116873199	116883999	DB_Ctrl_dev_H3K27me3_P39_vs_E14_up_2368|6.26|4.29|1.97	0	.
chr6	146288199	146296399	DB_Ctrl_dev_H3K27me3_P39_vs_E14_up_2387|6.5|4.71|1.79	0	.
chr6	141429199	141436799	DB_Ctrl_dev_H3K27me3_P39_vs_E14_up_2390|5.95|3.47|2.48	0	.
chr13	47597999	47608399	DB_Ctrl_dev_H3K27me3_P39_vs_E14_up_2391|6.69|5.1|1.59	0	.
chr5	22091199	22097199	DB_Ctrl_dev_H3K27me3_P39_vs_E14_up_2392|5.34|1.5|3.84	0	.
chr10	39187399	39194399	DB_Ctrl_dev_H3K27me3_P39_vs_E14_up_2395|5.78|2.85|2.93	0	.
chr16	88905799	88910799	DB_Ctrl_dev_H3K27me3_P39_vs_E14_up_2396|5.53|2.58|2.94	0	.
chr2	22290799	22295999	DB_Ctrl_dev_H3K27me3_P39_vs_E14_up_2399|5.29|1.28|4	0	.
chr1	186903199	186910999	DB_Ctrl_dev_H3K27me3_P39_vs_E14_up_2403|6.48|4.61|1.87	0	.
chr13	47356999	47365199	DB_Ctrl_dev_H3K27me3_P39_vs_E14_up_2406|6.09|3.92|2.17	0	.
chr1	186915799	186925599	DB_Ctrl_dev_H3K27me3_P39_vs_E14_up_2409|6.9|5.45|1.45	0	.
chr13	107902199	107905999	DB_Ctrl_dev_H3K27me3_P39_vs_E14_up_2412|5.54|2.62|2.92	0	.
chr1	167768199	167779799	DB_Ctrl_dev_H3K27me3_P39_vs_E14_up_2415|6.85|5.24|1.61	0	.
chr2	31946599	31956399	DB_Ctrl_dev_H3K27me3_P39_vs_E14_up_2416|6.68|5.08|1.61	0	.
chr6	22832599	22837199	DB_Ctrl_dev_H3K27me3_P39_vs_E14_up_2419|5.81|3.01|2.79	0	.
chr7	115874399	115879199	DB_Ctrl_dev_H3K27me3_P39_vs_E14_up_2420|5.7|3.07|2.63	0	.
chr14	54430399	54434599	DB_Ctrl_dev_H3K27me3_P39_vs_E14_up_2422|6.28|4.32|1.96	0	.
chr16	89504999	89516599	DB_Ctrl_dev_H3K27me3_P39_vs_E14_up_2423|6.64|5|1.64	0	.
chr9	116841199	116853599	DB_Ctrl_dev_H3K27me3_P39_vs_E14_up_2424|6.97|5.35|1.63	0	.
chr8	89667199	89680999	DB_Ctrl_dev_H3K27me3_P39_vs_E14_up_2425|6.86|5.37|1.48	0	.
chr3	127693999	127696799	DB_Ctrl_dev_H3K27me3_P39_vs_E14_up_2427|5.64|2.95|2.69	0	.
chr11	39775199	39784199	DB_Ctrl_dev_H3K27me3_P39_vs_E14_up_2429|6.06|3.93|2.13	0	.
chr14	118189599	118198199	DB_Ctrl_dev_H3K27me3_P39_vs_E14_up_2432|7.19|5.91|1.28	0	.
chr16	87827799	87840799	DB_Ctrl_dev_H3K27me3_P39_vs_E14_up_2434|6.95|5.53|1.42	0	.
chr16	88885799	88892599	DB_Ctrl_dev_H3K27me3_P39_vs_E14_up_2443|6.23|4.21|2.02	0	.
chr8	82006599	82011799	DB_Ctrl_dev_H3K27me3_P39_vs_E14_up_2449|5.31|1.5|3.81	0	.
chr1	188892799	188898799	DB_Ctrl_dev_H3K27me3_P39_vs_E14_up_2450|5.75|3.27|2.49	0	.
chr2	137651799	137657399	DB_Ctrl_dev_H3K27me3_P39_vs_E14_up_2454|5.23|-0.2|5.44	0	.
chr6	141454999	141464199	DB_Ctrl_dev_H3K27me3_P39_vs_E14_up_2455|6.5|4.77|1.73	0	.
chr9	68618199	68624599	DB_Ctrl_dev_H3K27me3_P39_vs_E14_up_2457|5.36|1.69|3.67	0	.
chr6	130800399	130805599	DB_Ctrl_dev_H3K27me3_P39_vs_E14_up_2467|5.48|2.46|3.02	0	.
chr2	106188999	106198999	DB_Ctrl_dev_H3K27me3_P39_vs_E14_up_2475|6.84|5.24|1.6	0	.
chr19	14049799	14055599	DB_Ctrl_dev_H3K27me3_P39_vs_E14_up_2481|5.48|2|3.48	0	.
chr3	126768399	126772599	DB_Ctrl_dev_H3K27me3_P39_vs_E14_up_2484|5.16|0.72|4.43	0	.
chr6	52366399	52370799	DB_Ctrl_dev_H3K27me3_P39_vs_E14_up_2485|5.41|2.27|3.14	0	.
chr18	13750599	13758399	DB_Ctrl_dev_H3K27me3_P39_vs_E14_up_2486|6.28|4.26|2.02	0	.
chr18	52855799	52861199	DB_Ctrl_dev_H3K27me3_P39_vs_E14_up_2489|5.27|1.03|4.24	0	.
chr2	159713799	159721599	DB_Ctrl_dev_H3K27me3_P39_vs_E14_up_2498|5.53|2.43|3.1	0	.
chr19	25570999	25579799	DB_Ctrl_dev_H3K27me3_P39_vs_E14_up_2499|6.98|5.48|1.5	0	.
chr2	135519999	135530199	DB_Ctrl_dev_H3K27me3_P39_vs_E14_up_2502|6.55|4.55|2	0	.
chr13	103885999	103889799	DB_Ctrl_dev_H3K27me3_P39_vs_E14_up_2504|5.15|0.43|4.73	0	.
chr2	115517599	115521599	DB_Ctrl_dev_H3K27me3_P39_vs_E14_up_2506|5.2|1.03|4.17	0	.
chr17	86933199	86945999	DB_Ctrl_dev_H3K27me3_P39_vs_E14_up_2513|7.12|5.79|1.34	0	.
chr1	40459999	40466799	DB_Ctrl_dev_H3K27me3_P39_vs_E14_up_2515|5.82|3.45|2.37	0	.
chr3	63318399	63324999	DB_Ctrl_dev_H3K27me3_P39_vs_E14_up_2526|5.51|2.23|3.28	0	.
chr18	13981599	13990999	DB_Ctrl_dev_H3K27me3_P39_vs_E14_up_2530|6.12|4.05|2.07	0	.
chr16	88343999	88348999	DB_Ctrl_dev_H3K27me3_P39_vs_E14_up_2531|5.13|0.43|4.71	0	.
chr9	87417999	87425399	DB_Ctrl_dev_H3K27me3_P39_vs_E14_up_2535|6.49|4.35|2.15	0	.
chr7	136053999	136066399	DB_Ctrl_dev_H3K27me3_P39_vs_E14_up_2536|7.11|5.79|1.32	0	.
chr13	47684999	47691199	DB_Ctrl_dev_H3K27me3_P39_vs_E14_up_2540|5.13|0.72|4.41	0	.
chr2	137617399	137624399	DB_Ctrl_dev_H3K27me3_P39_vs_E14_up_2541|6.5|4.73|1.78	0	.
chr2	113963799	113975999	DB_Ctrl_dev_H3K27me3_P39_vs_E14_up_2543|6.82|5.3|1.52	0	.
chr4	45687999	45701399	DB_Ctrl_dev_H3K27me3_P39_vs_E14_up_2545|7.16|5.76|1.4	0	.
chr9	49205999	49213399	DB_Ctrl_dev_H3K27me3_P39_vs_E14_up_2546|6.46|4.6|1.86	0	.
chr17	73981599	73996599	DB_Ctrl_dev_H3K27me3_P39_vs_E14_up_2552|7.03|5.6|1.42	0	.
chr1	193524199	193529599	DB_Ctrl_dev_H3K27me3_P39_vs_E14_up_2553|5.43|2|3.43	0	.
chr4	111868399	111880999	DB_Ctrl_dev_H3K27me3_P39_vs_E14_up_2554|7.08|5.74|1.35	0	.
chr1	61410799	61421599	DB_Ctrl_dev_H3K27me3_P39_vs_E14_up_2565|6.64|4.89|1.76	0	.
chr3	38231399	38237599	DB_Ctrl_dev_H3K27me3_P39_vs_E14_up_2584|6.2|4.14|2.06	0	.
chr12	53875799	53884599	DB_Ctrl_dev_H3K27me3_P39_vs_E14_up_2586|5.83|3.53|2.3	0	.
chr9	74486199	74490599	DB_Ctrl_dev_H3K27me3_P39_vs_E14_up_2593|5.17|-0.2|5.38	0	.
chr6	100102399	100114799	DB_Ctrl_dev_H3K27me3_P39_vs_E14_up_2596|6.92|5.44|1.48	0	.
chr6	48201199	48216999	DB_Ctrl_dev_H3K27me3_P39_vs_E14_up_2598|7.14|5.75|1.39	0	.
chr1	190369999	190409199	DB_Ctrl_dev_H3K27me3_P39_vs_E14_up_2603|8.84|8.1|0.74	0	.
chr7	119063399	119069199	DB_Ctrl_dev_H3K27me3_P39_vs_E14_up_2604|6.22|4.31|1.91	0	.
chr13	47553799	47558999	DB_Ctrl_dev_H3K27me3_P39_vs_E14_up_2609|5.92|3.59|2.33	0	.
chr8	89191599	89200199	DB_Ctrl_dev_H3K27me3_P39_vs_E14_up_2613|6.37|4.58|1.79	0	.
chr18	52780199	52783799	DB_Ctrl_dev_H3K27me3_P39_vs_E14_up_2618|5.16|-0.2|5.36	0	.
chr10	120361199	120369999	DB_Ctrl_dev_H3K27me3_P39_vs_E14_up_2620|6.54|4.43|2.11	0	.
chr8	29629999	29637599	DB_Ctrl_dev_H3K27me3_P39_vs_E14_up_2621|5.83|3.46|2.37	0	.
chr7	115698999	115708799	DB_Ctrl_dev_H3K27me3_P39_vs_E14_up_2627|6.83|5.26|1.57	0	.
chr3	129410599	129419599	DB_Ctrl_dev_H3K27me3_P39_vs_E14_up_2628|6.12|3.88|2.24	0	.
chr16	88354199	88362799	DB_Ctrl_dev_H3K27me3_P39_vs_E14_up_2630|6.53|4.7|1.83	0	.
chr6	53610799	53614599	DB_Ctrl_dev_H3K27me3_P39_vs_E14_up_2635|5.36|1.85|3.51	0	.
chr2	169485599	169504799	DB_Ctrl_dev_H3K27me3_P39_vs_E14_up_2640|7.42|6.3|1.12	0	.
chr14	33792599	33802599	DB_Ctrl_dev_H3K27me3_P39_vs_E14_up_2642|6.67|4.91|1.77	0	.
chr16	88900199	88904399	DB_Ctrl_dev_H3K27me3_P39_vs_E14_up_2643|5.64|2.88|2.76	0	.
chr7	134736799	134742599	DB_Ctrl_dev_H3K27me3_P39_vs_E14_up_2647|5.13|1.09|4.04	0	.
chr14	100471799	100482799	DB_Ctrl_dev_H3K27me3_P39_vs_E14_up_2651|6.69|5.08|1.62	0	.
chr7	128851999	128859199	DB_Ctrl_dev_H3K27me3_P39_vs_E14_up_2658|6|3.86|2.14	0	.
chr1	61260199	61273799	DB_Ctrl_dev_H3K27me3_P39_vs_E14_up_2662|6.79|5.28|1.51	0	.
chr2	113978199	113986599	DB_Ctrl_dev_H3K27me3_P39_vs_E14_up_2665|6.09|3.89|2.2	0	.
chr16	87578399	87581199	DB_Ctrl_dev_H3K27me3_P39_vs_E14_up_2668|5.31|1.87|3.44	0	.
chr15	88310399	88318999	DB_Ctrl_dev_H3K27me3_P39_vs_E14_up_2669|6.5|4.78|1.72	0	.
chr9	77500399	77505999	DB_Ctrl_dev_H3K27me3_P39_vs_E14_up_2670|5.48|2.42|3.06	0	.
chr4	84626799	84640199	DB_Ctrl_dev_H3K27me3_P39_vs_E14_up_2671|7.21|5.97|1.24	0	.
chr3	63966599	63970399	DB_Ctrl_dev_H3K27me3_P39_vs_E14_up_2672|5.19|1.28|3.91	0	.
chr4	84364799	84371399	DB_Ctrl_dev_H3K27me3_P39_vs_E14_up_2674|5.95|3.69|2.26	0	.
chr6	53293799	53298999	DB_Ctrl_dev_H3K27me3_P39_vs_E14_up_2675|5.64|3.12|2.53	0	.
chr13	56497399	56506399	DB_Ctrl_dev_H3K27me3_P39_vs_E14_up_2676|6.42|4.64|1.78	0	.
chr1	14296799	14312999	DB_Ctrl_dev_H3K27me3_P39_vs_E14_up_2677|7.47|6.35|1.12	0	.
chr13	103916599	103920399	DB_Ctrl_dev_H3K27me3_P39_vs_E14_up_2679|5.54|2.37|3.17	0	.
chr1	150943799	150947599	DB_Ctrl_dev_H3K27me3_P39_vs_E14_up_2686|5.09|0.43|4.66	0	.
chr19	59447999	59473199	DB_Ctrl_dev_H3K27me3_P39_vs_E14_up_2693|8.7|7.97|0.73	0	.
chr14	28795599	28800199	DB_Ctrl_dev_H3K27me3_P39_vs_E14_up_2694|6.16|4.23|1.94	0	.
chr4	54495999	54500799	DB_Ctrl_dev_H3K27me3_P39_vs_E14_up_2702|5.07|0.33|4.74	0	.
chr10	19457199	19460799	DB_Ctrl_dev_H3K27me3_P39_vs_E14_up_2711|5.55|2.37|3.18	0	.
chr7	82808799	82813999	DB_Ctrl_dev_H3K27me3_P39_vs_E14_up_2715|5.36|2.17|3.19	0	.
chr6	6161599	6164999	DB_Ctrl_dev_H3K27me3_P39_vs_E14_up_2716|5.29|1.69|3.6	0	.
chr9	118443399	118495399	DB_Ctrl_dev_H3K27me3_P39_vs_E14_up_2724|9.56|8.91|0.65	0	.
chr12	75872999	75877199	DB_Ctrl_dev_H3K27me3_P39_vs_E14_up_2729|5.11|-0.2|5.32	0	.
chr16	25956599	25960399	DB_Ctrl_dev_H3K27me3_P39_vs_E14_up_2730|5.34|1.9|3.44	0	.
chr9	117117599	117124799	DB_Ctrl_dev_H3K27me3_P39_vs_E14_up_2733|6.08|3.89|2.19	0	.
chr2	179690399	179699399	DB_Ctrl_dev_H3K27me3_P39_vs_E14_up_2734|6.35|4.5|1.86	0	.
chr18	57245799	57254199	DB_Ctrl_dev_H3K27me3_P39_vs_E14_up_2735|6.48|4.79|1.69	0	.
chr11	33606999	33621399	DB_Ctrl_dev_H3K27me3_P39_vs_E14_up_2737|7.4|6.26|1.13	0	.
chr6	137696599	137708399	DB_Ctrl_dev_H3K27me3_P39_vs_E14_up_2738|6.97|5.51|1.46	0	.
chr13	56730799	56742799	DB_Ctrl_dev_H3K27me3_P39_vs_E14_up_2739|6.74|5.04|1.7	0	.
chr9	47038799	47043599	DB_Ctrl_dev_H3K27me3_P39_vs_E14_up_2742|5.36|1.85|3.51	0	.
chr13	58501399	58513999	DB_Ctrl_dev_H3K27me3_P39_vs_E14_up_2743|6.8|5.18|1.62	0	.
chr2	86348799	86355199	DB_Ctrl_dev_H3K27me3_P39_vs_E14_up_2749|5.11|-0.2|5.32	0	.
chr3	134207399	134213999	DB_Ctrl_dev_H3K27me3_P39_vs_E14_up_2750|5.58|2.59|2.99	0	.
chr12	63555999	63560599	DB_Ctrl_dev_H3K27me3_P39_vs_E14_up_2754|5.17|1.28|3.89	0	.
chr6	16796399	16801399	DB_Ctrl_dev_H3K27me3_P39_vs_E14_up_2760|5.79|3.51|2.29	0	.
chr9	107445599	107476199	DB_Ctrl_dev_H3K27me3_P39_vs_E14_up_2767|8.49|7.68|0.81	0	.
chr18	13917199	13919999	DB_Ctrl_dev_H3K27me3_P39_vs_E14_up_2772|5.27|1.98|3.29	0	.
chr12	73380599	73391199	DB_Ctrl_dev_H3K27me3_P39_vs_E14_up_2773|7.08|5.77|1.31	0	.
chr14	32416599	32430599	DB_Ctrl_dev_H3K27me3_P39_vs_E14_up_2784|7.21|6.01|1.2	0	.
chr13	111974199	111985999	DB_Ctrl_dev_H3K27me3_P39_vs_E14_up_2785|7.09|5.8|1.29	0	.
chr12	47620599	47631399	DB_Ctrl_dev_H3K27me3_P39_vs_E14_up_2789|6.54|4.86|1.68	0	.
chr7	115882599	115888199	DB_Ctrl_dev_H3K27me3_P39_vs_E14_up_2796|5.74|3.33|2.41	0	.
chr6	140907799	140911399	DB_Ctrl_dev_H3K27me3_P39_vs_E14_up_2800|5.33|1.85|3.47	0	.
chr7	79211199	79214399	DB_Ctrl_dev_H3K27me3_P39_vs_E14_up_2803|5.31|1.8|3.52	0	.
chr8	26253599	26261399	DB_Ctrl_dev_H3K27me3_P39_vs_E14_up_2806|6.25|4.23|2.02	0	.
chr3	115853799	115860799	DB_Ctrl_dev_H3K27me3_P39_vs_E14_up_2810|6.81|5.24|1.57	0	.
chr6	137581399	137586199	DB_Ctrl_dev_H3K27me3_P39_vs_E14_up_2815|6.03|3.55|2.48	0	.
chr4	8695199	8700999	DB_Ctrl_dev_H3K27me3_P39_vs_E14_up_2816|6.01|3.92|2.09	0	.
chr18	74535399	74545799	DB_Ctrl_dev_H3K27me3_P39_vs_E14_up_2817|6.73|5.16|1.58	0	.
chr1	62242799	62249199	DB_Ctrl_dev_H3K27me3_P39_vs_E14_up_2820|5.52|2.37|3.15	0	.
chr6	148941399	148945799	DB_Ctrl_dev_H3K27me3_P39_vs_E14_up_2821|6.23|4.15|2.07	0	.
chr7	73301599	73308399	DB_Ctrl_dev_H3K27me3_P39_vs_E14_up_2824|6.6|4.96|1.64	0	.
chr8	112425799	112430799	DB_Ctrl_dev_H3K27me3_P39_vs_E14_up_2825|6.13|4.16|1.97	0	.
chr15	77688399	77692399	DB_Ctrl_dev_H3K27me3_P39_vs_E14_up_2828|5.77|3.49|2.28	0	.
chr11	57652199	57660199	DB_Ctrl_dev_H3K27me3_P39_vs_E14_up_2830|7|5.56|1.44	0	.
chr11	96487199	96492799	DB_Ctrl_dev_H3K27me3_P39_vs_E14_up_2832|5.97|3.77|2.2	0	.
chr17	68873399	68878799	DB_Ctrl_dev_H3K27me3_P39_vs_E14_up_2834|5.27|1.98|3.29	0	.
chr12	45561599	45566999	DB_Ctrl_dev_H3K27me3_P39_vs_E14_up_2835|5.81|3.43|2.38	0	.
chr15	55746599	55759999	DB_Ctrl_dev_H3K27me3_P39_vs_E14_up_2838|6.81|5.32|1.48	0	.
chr16	89759599	89768999	DB_Ctrl_dev_H3K27me3_P39_vs_E14_up_2843|6.64|5.08|1.55	0	.
chr6	140758799	140782399	DB_Ctrl_dev_H3K27me3_P39_vs_E14_up_2845|8.4|6.3|2.1	0	.
chr4	84372199	84377399	DB_Ctrl_dev_H3K27me3_P39_vs_E14_up_2847|5.78|3.45|2.33	0	.
chr17	43233799	43240799	DB_Ctrl_dev_H3K27me3_P39_vs_E14_up_2848|5.79|3.3|2.5	0	.
chr16	88929199	88934599	DB_Ctrl_dev_H3K27me3_P39_vs_E14_up_2849|5.07|-0.2|5.27	0	.
chr9	117136599	117141599	DB_Ctrl_dev_H3K27me3_P39_vs_E14_up_2850|5.78|3.32|2.46	0	.
chr6	53228599	53235799	DB_Ctrl_dev_H3K27me3_P39_vs_E14_up_2853|6.2|4.03|2.17	0	.
chr6	107366199	107373999	DB_Ctrl_dev_H3K27me3_P39_vs_E14_up_2855|5.85|3.48|2.37	0	.
chr1	129236799	129242599	DB_Ctrl_dev_H3K27me3_P39_vs_E14_up_2856|5.73|3.35|2.38	0	.
chr11	18414799	18426599	DB_Ctrl_dev_H3K27me3_P39_vs_E14_up_2857|6.74|5.17|1.58	0	.
chr11	71807399	71826999	DB_Ctrl_dev_H3K27me3_P39_vs_E14_up_2860|7.62|6.52|1.1	0	.
chr4	147332799	147341799	DB_Ctrl_dev_H3K27me3_P39_vs_E14_up_2861|7.31|6.09|1.22	0	.
chr3	145612399	145626199	DB_Ctrl_dev_H3K27me3_P39_vs_E14_up_2864|7.02|5.56|1.47	0	.
chr2	110398799	110404399	DB_Ctrl_dev_H3K27me3_P39_vs_E14_up_2866|5.46|2.67|2.79	0	.
chr10	30890999	30896999	DB_Ctrl_dev_H3K27me3_P39_vs_E14_up_2868|5.03|0.43|4.6	0	.
chr9	73236799	73241399	DB_Ctrl_dev_H3K27me3_P39_vs_E14_up_2873|5.08|-0.2|5.28	0	.
chr2	10973599	10983999	DB_Ctrl_dev_H3K27me3_P39_vs_E14_up_2875|6.3|4.52|1.78	0	.
chr16	24492999	24498599	DB_Ctrl_dev_H3K27me3_P39_vs_E14_up_2876|5.39|2.07|3.32	0	.
chr8	89059199	89073399	DB_Ctrl_dev_H3K27me3_P39_vs_E14_up_2881|6.94|5.61|1.33	0	.
chr13	72251399	72267599	DB_Ctrl_dev_H3K27me3_P39_vs_E14_up_2882|7.46|6.19|1.27	0	.
chr8	49358599	49362999	DB_Ctrl_dev_H3K27me3_P39_vs_E14_up_2884|5.27|1.69|3.59	0	.
chr7	115572999	115576599	DB_Ctrl_dev_H3K27me3_P39_vs_E14_up_2885|5.05|-0.2|5.25	0	.
chr12	110294199	110302599	DB_Ctrl_dev_H3K27me3_P39_vs_E14_up_2887|6.32|4.44|1.88	0	.
chr13	112227399	112232599	DB_Ctrl_dev_H3K27me3_P39_vs_E14_up_2891|5.97|3.94|2.03	0	.
chr10	85533199	85540199	DB_Ctrl_dev_H3K27me3_P39_vs_E14_up_2895|5.69|3.33|2.36	0	.
chr2	22182999	22190999	DB_Ctrl_dev_H3K27me3_P39_vs_E14_up_2897|6.49|4.52|1.97	0	.
chr6	130833399	130840999	DB_Ctrl_dev_H3K27me3_P39_vs_E14_up_2899|6.05|3.8|2.26	0	.
chr5	26981199	26987999	DB_Ctrl_dev_H3K27me3_P39_vs_E14_up_2902|5.66|2.67|2.99	0	.
chr3	132017399	132021799	DB_Ctrl_dev_H3K27me3_P39_vs_E14_up_2904|5.51|2.61|2.9	0	.
chr1	150903199	150912199	DB_Ctrl_dev_H3K27me3_P39_vs_E14_up_2905|6.42|4.63|1.79	0	.
chr1	126725599	126730599	DB_Ctrl_dev_H3K27me3_P39_vs_E14_up_2908|5.05|-0.2|5.26	0	.
chr3	129100199	129104199	DB_Ctrl_dev_H3K27me3_P39_vs_E14_up_2911|5.44|2.69|2.75	0	.
chr14	76331399	76341199	DB_Ctrl_dev_H3K27me3_P39_vs_E14_up_2914|6.4|4.68|1.72	0	.
chr2	82579799	82587799	DB_Ctrl_dev_H3K27me3_P39_vs_E14_up_2919|6.14|3.91|2.22	0	.
chr16	19755999	19762399	DB_Ctrl_dev_H3K27me3_P39_vs_E14_up_2920|6.14|4.25|1.89	0	.
chr3	35348399	35359399	DB_Ctrl_dev_H3K27me3_P39_vs_E14_up_2924|6.55|4.98|1.56	0	.
chr7	51760999	51775599	DB_Ctrl_dev_H3K27me3_P39_vs_E14_up_2929|6.71|5.04|1.68	0	.
chr16	87940199	87947599	DB_Ctrl_dev_H3K27me3_P39_vs_E14_up_2941|6.12|4.04|2.08	0	.
chr18	13765799	13774399	DB_Ctrl_dev_H3K27me3_P39_vs_E14_up_2943|6.3|4.44|1.86	0	.
chr11	34170399	34183599	DB_Ctrl_dev_H3K27me3_P39_vs_E14_up_2945|6.73|5.13|1.61	0	.
chr1	6465799	6477999	DB_Ctrl_dev_H3K27me3_P39_vs_E14_up_2949|6.34|4.49|1.85	0	.
chr8	89129999	89138399	DB_Ctrl_dev_H3K27me3_P39_vs_E14_up_2951|6.93|5.61|1.32	0	.
chr10	43577999	43582199	DB_Ctrl_dev_H3K27me3_P39_vs_E14_up_2953|5.75|3.31|2.44	0	.
chr5	26915599	26922199	DB_Ctrl_dev_H3K27me3_P39_vs_E14_up_2955|6.51|4.84|1.67	0	.
chr7	76043999	76047199	DB_Ctrl_dev_H3K27me3_P39_vs_E14_up_2956|5.23|1.69|3.55	0	.
chr11	18393999	18397199	DB_Ctrl_dev_H3K27me3_P39_vs_E14_up_2962|5.4|2.28|3.11	0	.
chr17	72489199	72496199	DB_Ctrl_dev_H3K27me3_P39_vs_E14_up_2963|5.98|4|1.98	0	.
chr10	92293599	92298199	DB_Ctrl_dev_H3K27me3_P39_vs_E14_up_2964|5.83|3.67|2.16	0	.
chr1	167867399	167881199	DB_Ctrl_dev_H3K27me3_P39_vs_E14_up_2967|7.24|6.09|1.15	0	.
chr14	101511399	101522799	DB_Ctrl_dev_H3K27me3_P39_vs_E14_up_2972|6.9|5.52|1.38	0	.
chr17	72392399	72398199	DB_Ctrl_dev_H3K27me3_P39_vs_E14_up_2973|6.24|4.42|1.82	0	.
chr18	74425599	74431599	DB_Ctrl_dev_H3K27me3_P39_vs_E14_up_2974|6.3|4.56|1.73	0	.
chr10	120268399	120278199	DB_Ctrl_dev_H3K27me3_P39_vs_E14_up_2978|6.58|5.01|1.57	0	.
chr5	5734999	5744399	DB_Ctrl_dev_H3K27me3_P39_vs_E14_up_2985|6.27|4.24|2.03	0	.
chr1	128799599	128803999	DB_Ctrl_dev_H3K27me3_P39_vs_E14_up_2988|5.49|2.86|2.64	0	.
chr1	62009199	62012799	DB_Ctrl_dev_H3K27me3_P39_vs_E14_up_2991|5.01|-0.2|5.21	0	.
chr12	73412399	73415399	DB_Ctrl_dev_H3K27me3_P39_vs_E14_up_2993|5.31|2.03|3.28	0	.
chr6	100294199	100302599	DB_Ctrl_dev_H3K27me3_P39_vs_E14_up_2999|6.62|5.11|1.51	0	.
chr6	97310399	97318799	DB_Ctrl_dev_H3K27me3_P39_vs_E14_up_3002|6.79|5.36|1.43	0	.
chr4	124034799	124043199	DB_Ctrl_dev_H3K27me3_P39_vs_E14_up_3003|6.25|4.31|1.94	0	.
chr8	89526999	89539799	DB_Ctrl_dev_H3K27me3_P39_vs_E14_up_3007|7.31|6.17|1.14	0	.
chr6	145577599	145584599	DB_Ctrl_dev_H3K27me3_P39_vs_E14_up_3008|6.16|3.91|2.25	0	.
chr16	88751799	88758199	DB_Ctrl_dev_H3K27me3_P39_vs_E14_up_3010|5.36|2.38|2.98	0	.
chr5	26777599	26781199	DB_Ctrl_dev_H3K27me3_P39_vs_E14_up_3011|5.01|-0.2|5.21	0	.
chr11	33296399	33303799	DB_Ctrl_dev_H3K27me3_P39_vs_E14_up_3013|5.64|2.67|2.98	0	.
chr11	34334599	34347999	DB_Ctrl_dev_H3K27me3_P39_vs_E14_up_3014|7.05|5.8|1.25	0	.
chr1	150896199	150902399	DB_Ctrl_dev_H3K27me3_P39_vs_E14_up_3015|6.12|4.13|1.99	0	.
chr6	142638599	142642999	DB_Ctrl_dev_H3K27me3_P39_vs_E14_up_3020|4.96|0.33|4.63	0	.
chr2	13573999	13580599	DB_Ctrl_dev_H3K27me3_P39_vs_E14_up_3024|6.33|4.62|1.7	0	.
chr15	26572999	26580399	DB_Ctrl_dev_H3K27me3_P39_vs_E14_up_3029|6.18|4.35|1.83	0	.
chr6	53411999	53418199	DB_Ctrl_dev_H3K27me3_P39_vs_E14_up_3033|5.71|3.4|2.31	0	.
chr11	76346199	76355599	DB_Ctrl_dev_H3K27me3_P39_vs_E14_up_3035|6.64|5.14|1.49	0	.
chr2	75584399	75590399	DB_Ctrl_dev_H3K27me3_P39_vs_E14_up_3036|6.4|4.72|1.69	0	.
chr16	88422599	88434399	DB_Ctrl_dev_H3K27me3_P39_vs_E14_up_3040|6.77|5.16|1.61	0	.
chr16	88938199	88944799	DB_Ctrl_dev_H3K27me3_P39_vs_E14_up_3043|6.29|4.45|1.84	0	.
chr1	190456199	190465399	DB_Ctrl_dev_H3K27me3_P39_vs_E14_up_3048|6.58|4.67|1.91	0	.
chr8	81999199	82002399	DB_Ctrl_dev_H3K27me3_P39_vs_E14_up_3049|4.99|-0.2|5.19	0	.
chr5	140345399	140364199	DB_Ctrl_dev_H3K27me3_P39_vs_E14_up_3061|7.34|6.13|1.21	0	.
chr1	89383999	89395999	DB_Ctrl_dev_H3K27me3_P39_vs_E14_up_3063|7|5.53|1.47	0	.
chr2	117594799	117604599	DB_Ctrl_dev_H3K27me3_P39_vs_E14_up_3071|6.16|3.99|2.17	0	.
chr7	93059399	93070999	DB_Ctrl_dev_H3K27me3_P39_vs_E14_up_3072|6.29|4.38|1.91	0	.
chr12	118454599	118466599	DB_Ctrl_dev_H3K27me3_P39_vs_E14_up_3073|7.5|6.38|1.12	0	.
chr9	90685399	90698999	DB_Ctrl_dev_H3K27me3_P39_vs_E14_up_3077|7.32|6.07|1.26	0	.
chr11	33644199	33650199	DB_Ctrl_dev_H3K27me3_P39_vs_E14_up_3078|5.82|3.68|2.14	0	.
chr7	136075799	136085999	DB_Ctrl_dev_H3K27me3_P39_vs_E14_up_3085|6.87|5.52|1.35	0	.
chr2	147705999	147710399	DB_Ctrl_dev_H3K27me3_P39_vs_E14_up_3089|5.62|2.67|2.95	0	.
chr12	106230999	106234999	DB_Ctrl_dev_H3K27me3_P39_vs_E14_up_3090|5.03|1.03|4	0	.
chr2	33961999	33968599	DB_Ctrl_dev_H3K27me3_P39_vs_E14_up_3091|6.35|4.67|1.68	0	.
chr2	57791399	57800199	DB_Ctrl_dev_H3K27me3_P39_vs_E14_up_3098|6.12|4.21|1.91	0	.
chr1	186831199	186836599	DB_Ctrl_dev_H3K27me3_P39_vs_E14_up_3101|6.48|4.86|1.62	0	.
chr4	8983799	8990999	DB_Ctrl_dev_H3K27me3_P39_vs_E14_up_3102|6.26|4.49|1.77	0	.
chr7	115598999	115605599	DB_Ctrl_dev_H3K27me3_P39_vs_E14_up_3104|6.02|4.06|1.96	0	.
chr9	77470399	77480999	DB_Ctrl_dev_H3K27me3_P39_vs_E14_up_3109|7|5.53|1.47	0	.
chr2	8891599	8894999	DB_Ctrl_dev_H3K27me3_P39_vs_E14_up_3110|4.96|-0.2|5.17	0	.
chr1	150932799	150938599	DB_Ctrl_dev_H3K27me3_P39_vs_E14_up_3111|5.61|3.14|2.47	0	.
chr10	23516399	23520799	DB_Ctrl_dev_H3K27me3_P39_vs_E14_up_3112|5.32|2|3.32	0	.
chr6	15409999	15413799	DB_Ctrl_dev_H3K27me3_P39_vs_E14_up_3116|4.96|-0.2|5.17	0	.
chr3	35322399	35327199	DB_Ctrl_dev_H3K27me3_P39_vs_E14_up_3124|5.5|2.87|2.62	0	.
chr12	45668599	45673399	DB_Ctrl_dev_H3K27me3_P39_vs_E14_up_3128|5.41|2.54|2.87	0	.
chr2	160398599	160403399	DB_Ctrl_dev_H3K27me3_P39_vs_E14_up_3130|5.2|1.69|3.51	0	.
chr6	145776399	145783599	DB_Ctrl_dev_H3K27me3_P39_vs_E14_up_3137|5.6|3.14|2.46	0	.
chr2	159953199	159961399	DB_Ctrl_dev_H3K27me3_P39_vs_E14_up_3142|6.18|4.37|1.81	0	.
chr1	125989599	125995399	DB_Ctrl_dev_H3K27me3_P39_vs_E14_up_3143|5.78|3.28|2.5	0	.
chr11	96499599	96503399	DB_Ctrl_dev_H3K27me3_P39_vs_E14_up_3144|5.12|1.47|3.64	0	.
chr3	29810599	29815399	DB_Ctrl_dev_H3K27me3_P39_vs_E14_up_3147|5.86|3.27|2.59	0	.
chr5	106012399	106016799	DB_Ctrl_dev_H3K27me3_P39_vs_E14_up_3148|5.78|3.55|2.23	0	.
chr2	56660399	56665399	DB_Ctrl_dev_H3K27me3_P39_vs_E14_up_3150|5.07|1.28|3.79	0	.
chr11	34348799	34357199	DB_Ctrl_dev_H3K27me3_P39_vs_E14_up_3151|6.25|4.49|1.77	0	.
chr7	110269199	110274399	DB_Ctrl_dev_H3K27me3_P39_vs_E14_up_3158|5.07|1.28|3.79	0	.
chr4	94372999	94384999	DB_Ctrl_dev_H3K27me3_P39_vs_E14_up_3161|6.66|5.14|1.52	0	.
chr3	83747999	83757199	DB_Ctrl_dev_H3K27me3_P39_vs_E14_up_3163|6.35|4.67|1.68	0	.
chr3	38833399	38837799	DB_Ctrl_dev_H3K27me3_P39_vs_E14_up_3164|4.97|-0.2|5.17	0	.
chr2	82574599	82578799	DB_Ctrl_dev_H3K27me3_P39_vs_E14_up_3168|4.94|-0.2|5.14	0	.
chr18	74632999	74646999	DB_Ctrl_dev_H3K27me3_P39_vs_E14_up_3176|7.05|5.81|1.24	0	.
chr14	55822199	55826799	DB_Ctrl_dev_H3K27me3_P39_vs_E14_up_3179|6.22|4.35|1.86	0	.
chr8	61590799	61592999	DB_Ctrl_dev_H3K27me3_P39_vs_E14_up_3181|4.99|1.09|3.9	0	.
chr8	48816799	48821399	DB_Ctrl_dev_H3K27me3_P39_vs_E14_up_3183|5.27|2.19|3.08	0	.
chr2	169453999	169460199	DB_Ctrl_dev_H3K27me3_P39_vs_E14_up_3184|6.23|4.48|1.75	0	.
chr12	106476199	106482999	DB_Ctrl_dev_H3K27me3_P39_vs_E14_up_3186|6.49|4.83|1.67	0	.
chr13	114570399	114578599	DB_Ctrl_dev_H3K27me3_P39_vs_E14_up_3188|6.16|4.25|1.91	0	.
chr9	41789399	41795999	DB_Ctrl_dev_H3K27me3_P39_vs_E14_up_3190|6.21|4.44|1.76	0	.
chr16	21722599	21726399	DB_Ctrl_dev_H3K27me3_P39_vs_E14_up_3191|5.07|1.28|3.79	0	.
chr6	23130799	23134999	DB_Ctrl_dev_H3K27me3_P39_vs_E14_up_3195|5.85|3.39|2.46	0	.
chr8	88935799	88940199	DB_Ctrl_dev_H3K27me3_P39_vs_E14_up_3196|5.19|1.69|3.51	0	.
chr13	112075599	112081599	DB_Ctrl_dev_H3K27me3_P39_vs_E14_up_3199|6|4.08|1.92	0	.
chr16	88869399	88873199	DB_Ctrl_dev_H3K27me3_P39_vs_E14_up_3201|5.45|2.73|2.72	0	.
chr2	172577999	172582599	DB_Ctrl_dev_H3K27me3_P39_vs_E14_up_3202|5.25|2.22|3.04	0	.
chr10	91205399	91212999	DB_Ctrl_dev_H3K27me3_P39_vs_E14_up_3204|5.86|3.82|2.04	0	.
chr18	58759599	58763199	DB_Ctrl_dev_H3K27me3_P39_vs_E14_up_3208|4.94|0.72|4.22	0	.
chr11	32807599	32820799	DB_Ctrl_dev_H3K27me3_P39_vs_E14_up_3211|6.3|4.63|1.67	0	.
chr11	44707799	44718799	DB_Ctrl_dev_H3K27me3_P39_vs_E14_up_3215|6.94|5.64|1.3	0	.
chr11	34097199	34102399	DB_Ctrl_dev_H3K27me3_P39_vs_E14_up_3217|5.71|3.47|2.25	0	.
chr9	68458599	68461799	DB_Ctrl_dev_H3K27me3_P39_vs_E14_up_3220|4.94|0.72|4.22	0	.
chr19	56056799	56064999	DB_Ctrl_dev_H3K27me3_P39_vs_E14_up_3221|6.42|4.79|1.64	0	.
chr8	78207799	78214399	DB_Ctrl_dev_H3K27me3_P39_vs_E14_up_3222|5.76|3.47|2.28	0	.
chr8	114887799	114894799	DB_Ctrl_dev_H3K27me3_P39_vs_E14_up_3223|6.14|4.31|1.82	0	.
chr18	55365599	55371399	DB_Ctrl_dev_H3K27me3_P39_vs_E14_up_3229|5.63|3.28|2.35	0	.
chr11	82282999	82286999	DB_Ctrl_dev_H3K27me3_P39_vs_E14_up_3231|4.89|0.33|4.56	0	.
chr2	159079799	159083599	DB_Ctrl_dev_H3K27me3_P39_vs_E14_up_3233|5.08|1.28|3.79	0	.
chr3	102132799	102136999	DB_Ctrl_dev_H3K27me3_P39_vs_E14_up_3239|5.62|3.03|2.59	0	.
chr14	11436799	11446999	DB_Ctrl_dev_H3K27me3_P39_vs_E14_up_3243|6.68|5.23|1.45	0	.
chr11	16614799	16618599	DB_Ctrl_dev_H3K27me3_P39_vs_E14_up_3247|5.12|1.5|3.62	0	.
chr9	91817399	91823999	DB_Ctrl_dev_H3K27me3_P39_vs_E14_up_3252|5.43|2.78|2.65	0	.
chr19	55862199	55868199	DB_Ctrl_dev_H3K27me3_P39_vs_E14_up_3253|5.89|3.72|2.17	0	.
chr3	35225399	35228999	DB_Ctrl_dev_H3K27me3_P39_vs_E14_up_3254|5.4|2.64|2.75	0	.
chr16	87971399	87976799	DB_Ctrl_dev_H3K27me3_P39_vs_E14_up_3256|5.49|2.48|3.02	0	.
chr6	20767999	20774399	DB_Ctrl_dev_H3K27me3_P39_vs_E14_up_3258|4.91|-0.2|5.12	0	.
chr1	190599199	190604799	DB_Ctrl_dev_H3K27me3_P39_vs_E14_up_3260|5.84|3.77|2.07	0	.
chr1	41650399	41655599	DB_Ctrl_dev_H3K27me3_P39_vs_E14_up_3261|5.09|1.62|3.47	0	.
chr14	33812799	33821399	DB_Ctrl_dev_H3K27me3_P39_vs_E14_up_3264|6.56|5.09|1.47	0	.
chr13	48127599	48134199	DB_Ctrl_dev_H3K27me3_P39_vs_E14_up_3265|6.21|4.18|2.03	0	.
chr14	57110999	57119799	DB_Ctrl_dev_H3K27me3_P39_vs_E14_up_3267|6.42|4.72|1.7	0	.
chr2	26073199	26080999	DB_Ctrl_dev_H3K27me3_P39_vs_E14_up_3268|6.27|4.51|1.76	0	.
chr6	97688399	97695199	DB_Ctrl_dev_H3K27me3_P39_vs_E14_up_3269|5.74|3.53|2.21	0	.
chr1	88549399	88554399	DB_Ctrl_dev_H3K27me3_P39_vs_E14_up_3270|5.83|3.76|2.07	0	.
chr5	26587999	26592799	DB_Ctrl_dev_H3K27me3_P39_vs_E14_up_3272|5.64|3.18|2.47	0	.
chr18	4083199	4090399	DB_Ctrl_dev_H3K27me3_P39_vs_E14_up_3273|6.39|4.76|1.62	0	.
chr2	145780199	145789599	DB_Ctrl_dev_H3K27me3_P39_vs_E14_up_3276|6.67|5.05|1.62	0	.
chr11	34533999	34538399	DB_Ctrl_dev_H3K27me3_P39_vs_E14_up_3280|4.98|1.03|3.95	0	.
chr2	133752399	133757999	DB_Ctrl_dev_H3K27me3_P39_vs_E14_up_3281|4.94|0.72|4.21	0	.
chr15	9711799	9718999	DB_Ctrl_dev_H3K27me3_P39_vs_E14_up_3282|5.61|3.3|2.31	0	.
chr18	74571599	74583199	DB_Ctrl_dev_H3K27me3_P39_vs_E14_up_3285|7.04|5.7|1.34	0	.
chr2	135552799	135557599	DB_Ctrl_dev_H3K27me3_P39_vs_E14_up_3290|5.23|2.03|3.2	0	.
chr6	147176399	147179599	DB_Ctrl_dev_H3K27me3_P39_vs_E14_up_3292|5.36|2.6|2.76	0	.
chr12	60997599	61002399	DB_Ctrl_dev_H3K27me3_P39_vs_E14_up_3294|4.91|0.8|4.12	0	.
chr6	146347599	146354199	DB_Ctrl_dev_H3K27me3_P39_vs_E14_up_3297|6.01|4.14|1.87	0	.
chr3	115771799	115777799	DB_Ctrl_dev_H3K27me3_P39_vs_E14_up_3298|6.49|4.94|1.55	0	.
chr6	141226799	141235799	DB_Ctrl_dev_H3K27me3_P39_vs_E14_up_3301|5.96|3.96|2	0	.
chr10	96522999	96525799	DB_Ctrl_dev_H3K27me3_P39_vs_E14_up_3302|4.89|-0.2|5.1	0	.
chr19	12687399	12690799	DB_Ctrl_dev_H3K27me3_P39_vs_E14_up_3303|4.89|-0.2|5.1	0	.
chr7	135073599	135078599	DB_Ctrl_dev_H3K27me3_P39_vs_E14_up_3306|5.52|3.1|2.42	0	.
chr7	139621999	139630199	DB_Ctrl_dev_H3K27me3_P39_vs_E14_up_3313|5.58|3.23|2.35	0	.
chr1	150990199	151004599	DB_Ctrl_dev_H3K27me3_P39_vs_E14_up_3314|7.51|6.47|1.04	0	.
chr13	47293199	47300399	DB_Ctrl_dev_H3K27me3_P39_vs_E14_up_3316|6.18|4.41|1.77	0	.
chr7	90261999	90266199	DB_Ctrl_dev_H3K27me3_P39_vs_E14_up_3317|5.38|2.26|3.12	0	.
chr8	108176999	108183599	DB_Ctrl_dev_H3K27me3_P39_vs_E14_up_3321|5.52|2.57|2.95	0	.
chr17	72242199	72250999	DB_Ctrl_dev_H3K27me3_P39_vs_E14_up_3327|6.67|5.24|1.44	0	.
chr11	34714399	34727399	DB_Ctrl_dev_H3K27me3_P39_vs_E14_up_3333|7.05|5.83|1.21	0	.
chr6	53720999	53731599	DB_Ctrl_dev_H3K27me3_P39_vs_E14_up_3335|6.62|5.12|1.5	0	.
chr16	63028599	63036999	DB_Ctrl_dev_H3K27me3_P39_vs_E14_up_3336|6.35|4.69|1.66	0	.
chr16	13573399	13582999	DB_Ctrl_dev_H3K27me3_P39_vs_E14_up_3347|6.22|4.45|1.77	0	.
chr2	8942399	8945599	DB_Ctrl_dev_H3K27me3_P39_vs_E14_up_3350|4.91|0.72|4.19	0	.
chr1	102331799	102339999	DB_Ctrl_dev_H3K27me3_P39_vs_E14_up_3357|6.37|4.65|1.71	0	.
chr1	68947999	68951399	DB_Ctrl_dev_H3K27me3_P39_vs_E14_up_3358|5.21|1.85|3.36	0	.
chr13	71450999	71460199	DB_Ctrl_dev_H3K27me3_P39_vs_E14_up_3363|6.89|5.42|1.47	0	.
chr13	15618599	15626199	DB_Ctrl_dev_H3K27me3_P39_vs_E14_up_3366|6.55|5.08|1.47	0	.
chr11	69947399	69950399	DB_Ctrl_dev_H3K27me3_P39_vs_E14_up_3375|6.16|4.36|1.8	0	.
chr2	169956199	169963399	DB_Ctrl_dev_H3K27me3_P39_vs_E14_up_3376|6.52|4.84|1.68	0	.
chr5	43509999	43522199	DB_Ctrl_dev_H3K27me3_P39_vs_E14_up_3378|6.88|5.37|1.51	0	.
chr2	57516199	57527999	DB_Ctrl_dev_H3K27me3_P39_vs_E14_up_3383|6.4|4.67|1.72	0	.
chr2	117478599	117482999	DB_Ctrl_dev_H3K27me3_P39_vs_E14_up_3386|5.4|2.78|2.62	0	.
chr2	71188799	71193799	DB_Ctrl_dev_H3K27me3_P39_vs_E14_up_3391|5.77|3.68|2.08	0	.
chr11	18123199	18129599	DB_Ctrl_dev_H3K27me3_P39_vs_E14_up_3392|5.88|3.9|1.98	0	.
chr14	58540199	58546199	DB_Ctrl_dev_H3K27me3_P39_vs_E14_up_3395|5.1|1.28|3.82	0	.
chr13	48030599	48036999	DB_Ctrl_dev_H3K27me3_P39_vs_E14_up_3396|5.9|3.58|2.32	0	.
chr13	71149999	71160799	DB_Ctrl_dev_H3K27me3_P39_vs_E14_up_3397|6.89|5.56|1.33	0	.
chr13	48100399	48105199	DB_Ctrl_dev_H3K27me3_P39_vs_E14_up_3398|6.07|4.26|1.81	0	.
chr5	37633199	37639799	DB_Ctrl_dev_H3K27me3_P39_vs_E14_up_3402|6.05|4.24|1.81	0	.
chr13	71473799	71481599	DB_Ctrl_dev_H3K27me3_P39_vs_E14_up_3408|6.03|4.12|1.91	0	.
chr2	154748799	154752599	DB_Ctrl_dev_H3K27me3_P39_vs_E14_up_3411|5.32|2.58|2.74	0	.
chr5	106264199	106271799	DB_Ctrl_dev_H3K27me3_P39_vs_E14_up_3414|5.96|3.89|2.07	0	.
chr10	120852799	120859199	DB_Ctrl_dev_H3K27me3_P39_vs_E14_up_3416|6.44|4.86|1.58	0	.
chr7	123725199	123728199	DB_Ctrl_dev_H3K27me3_P39_vs_E14_up_3417|4.87|0.43|4.44	0	.
chr5	50465399	50469399	DB_Ctrl_dev_H3K27me3_P39_vs_E14_up_3424|4.97|1.03|3.94	0	.
chr2	118174799	118182199	DB_Ctrl_dev_H3K27me3_P39_vs_E14_up_3425|5.57|3.22|2.36	0	.
chr1	121397399	121402799	DB_Ctrl_dev_H3K27me3_P39_vs_E14_up_3426|6.02|4.15|1.87	0	.
chr6	100124599	100138399	DB_Ctrl_dev_H3K27me3_P39_vs_E14_up_3427|6.73|5.31|1.42	0	.
chr12	46687799	46694799	DB_Ctrl_dev_H3K27me3_P39_vs_E14_up_3429|5.46|2.48|2.98	0	.
chr5	127382999	127389599	DB_Ctrl_dev_H3K27me3_P39_vs_E14_up_3430|5.7|3.3|2.41	0	.
chr10	97473399	97480999	DB_Ctrl_dev_H3K27me3_P39_vs_E14_up_3431|6.04|4.18|1.86	0	.
chr5	51391199	51398399	DB_Ctrl_dev_H3K27me3_P39_vs_E14_up_3432|5.92|3.92|2	0	.
chr8	81324399	81327999	DB_Ctrl_dev_H3K27me3_P39_vs_E14_up_3435|5.22|2.22|3	0	.
chr8	40970399	40982199	DB_Ctrl_dev_H3K27me3_P39_vs_E14_up_3436|6.76|5.36|1.4	0	.
chr8	115957599	115962599	DB_Ctrl_dev_H3K27me3_P39_vs_E14_up_3437|5.38|2.26|3.12	0	.
chr15	6300999	6308399	DB_Ctrl_dev_H3K27me3_P39_vs_E14_up_3439|6.39|4.81|1.57	0	.
chr13	47312599	47325999	DB_Ctrl_dev_H3K27me3_P39_vs_E14_up_3441|6.8|5.44|1.35	0	.
chr6	145758399	145767399	DB_Ctrl_dev_H3K27me3_P39_vs_E14_up_3444|6.84|5.43|1.41	0	.
chr18	12571599	12577599	DB_Ctrl_dev_H3K27me3_P39_vs_E14_up_3447|5.93|4.01|1.91	0	.
chr10	125663599	125667999	DB_Ctrl_dev_H3K27me3_P39_vs_E14_up_3448|4.84|0.33|4.51	0	.
chr4	142587199	142589199	DB_Ctrl_dev_H3K27me3_P39_vs_E14_up_3450|4.84|0.43|4.42	0	.
chr19	14795199	14807999	DB_Ctrl_dev_H3K27me3_P39_vs_E14_up_3455|6.98|5.56|1.42	0	.
chr16	64066399	64069799	DB_Ctrl_dev_H3K27me3_P39_vs_E14_up_3457|5.19|1.9|3.3	0	.
chr2	72426399	72429999	DB_Ctrl_dev_H3K27me3_P39_vs_E14_up_3462|4.84|-0.2|5.05	0	.
chr4	64537799	64543799	DB_Ctrl_dev_H3K27me3_P39_vs_E14_up_3463|6.01|4.06|1.95	0	.
chr8	89444199	89448199	DB_Ctrl_dev_H3K27me3_P39_vs_E14_up_3464|5.28|2.22|3.06	0	.
chr18	57223199	57227999	DB_Ctrl_dev_H3K27me3_P39_vs_E14_up_3466|5.74|3.62|2.12	0	.
chr13	7387599	7391399	DB_Ctrl_dev_H3K27me3_P39_vs_E14_up_3467|4.87|-0.2|5.08	0	.
chr3	29899599	29904599	DB_Ctrl_dev_H3K27me3_P39_vs_E14_up_3468|5|1.33|3.67	0	.
chr3	15134199	15139599	DB_Ctrl_dev_H3K27me3_P39_vs_E14_up_3474|5.01|1.28|3.73	0	.
chr4	11352999	11359399	DB_Ctrl_dev_H3K27me3_P39_vs_E14_up_3477|5.71|3.49|2.22	0	.
chr7	137730199	137745599	DB_Ctrl_dev_H3K27me3_P39_vs_E14_up_3480|6.79|5.43|1.36	0	.
chr11	101513599	101520799	DB_Ctrl_dev_H3K27me3_P39_vs_E14_up_3486|6.31|4.64|1.67	0	.
chr13	34128199	34132399	DB_Ctrl_dev_H3K27me3_P39_vs_E14_up_3488|5.01|1.28|3.72	0	.
chr12	45545399	45548999	DB_Ctrl_dev_H3K27me3_P39_vs_E14_up_3492|4.85|-0.2|5.05	0	.
chr19	14773399	14784999	DB_Ctrl_dev_H3K27me3_P39_vs_E14_up_3493|6.83|5.49|1.34	0	.
chr3	127727399	127731599	DB_Ctrl_dev_H3K27me3_P39_vs_E14_up_3495|5.49|2.69|2.81	0	.
chr1	187762599	187774599	DB_Ctrl_dev_H3K27me3_P39_vs_E14_up_3496|6.93|5.66|1.27	0	.
chr10	75443999	75446799	DB_Ctrl_dev_H3K27me3_P39_vs_E14_up_3498|4.85|0.43|4.42	0	.
chr7	51690599	51694599	DB_Ctrl_dev_H3K27me3_P39_vs_E14_up_3507|5.07|1.76|3.31	0	.
chr14	122380599	122398399	DB_Ctrl_dev_H3K27me3_P39_vs_E14_up_3508|7.83|6.92|0.91	0	.
chr10	34971799	34975199	DB_Ctrl_dev_H3K27me3_P39_vs_E14_up_3510|5.13|1.92|3.22	0	.
chr11	44942599	44967399	DB_Ctrl_dev_H3K27me3_P39_vs_E14_up_3512|7.53|6.57|0.96	0	.
chr17	31885599	31888399	DB_Ctrl_dev_H3K27me3_P39_vs_E14_up_3513|4.92|1.09|3.83	0	.
chr17	73738199	73743999	DB_Ctrl_dev_H3K27me3_P39_vs_E14_up_3515|5.6|3.16|2.44	0	.
chr13	47673799	47678399	DB_Ctrl_dev_H3K27me3_P39_vs_E14_up_3519|5.44|2.82|2.62	0	.
chr7	130189799	130191399	DB_Ctrl_dev_H3K27me3_P39_vs_E14_up_3520|4.92|1.09|3.83	0	.
chr2	159282399	159293599	DB_Ctrl_dev_H3K27me3_P39_vs_E14_up_3521|6.38|4.7|1.68	0	.
chr18	6150799	6156399	DB_Ctrl_dev_H3K27me3_P39_vs_E14_up_3524|5.56|3.24|2.31	0	.
chr6	50923799	50926999	DB_Ctrl_dev_H3K27me3_P39_vs_E14_up_3525|5.08|1.5|3.58	0	.
chr11	34690999	34696599	DB_Ctrl_dev_H3K27me3_P39_vs_E14_up_3529|6.02|4.1|1.92	0	.
chr13	112275999	112281399	DB_Ctrl_dev_H3K27me3_P39_vs_E14_up_3533|6.41|4.51|1.9	0	.
chr13	47441799	47447799	DB_Ctrl_dev_H3K27me3_P39_vs_E14_up_3536|5.88|3.71|2.17	0	.
chr10	120578199	120582999	DB_Ctrl_dev_H3K27me3_P39_vs_E14_up_3537|6.05|4.2|1.85	0	.
chr9	14702799	14712399	DB_Ctrl_dev_H3K27me3_P39_vs_E14_up_3538|6.64|5.25|1.38	0	.
chr1	6682399	6687399	DB_Ctrl_dev_H3K27me3_P39_vs_E14_up_3541|4.86|0.43|4.44	0	.
chr7	51592999	51597599	DB_Ctrl_dev_H3K27me3_P39_vs_E14_up_3543|6.15|4.4|1.75	0	.
chr14	97787799	97792399	DB_Ctrl_dev_H3K27me3_P39_vs_E14_up_3547|4.98|1.03|3.95	0	.
chr8	26244399	26249799	DB_Ctrl_dev_H3K27me3_P39_vs_E14_up_3548|5.53|2.77|2.75	0	.
chr5	127332999	127337999	DB_Ctrl_dev_H3K27me3_P39_vs_E14_up_3551|5.34|2.26|3.09	0	.
chr5	92241599	92247799	DB_Ctrl_dev_H3K27me3_P39_vs_E14_up_3552|5.89|3.83|2.06	0	.
chr11	11001799	11006199	DB_Ctrl_dev_H3K27me3_P39_vs_E14_up_3553|4.96|1.03|3.93	0	.
chr5	127496999	127509199	DB_Ctrl_dev_H3K27me3_P39_vs_E14_up_3554|6.62|5.19|1.43	0	.
chr11	80333399	80336199	DB_Ctrl_dev_H3K27me3_P39_vs_E14_up_3560|4.82|-0.2|5.02	0	.
chr16	57479999	57484799	DB_Ctrl_dev_H3K27me3_P39_vs_E14_up_3564|5.58|3.31|2.27	0	.
chr12	68861399	68866799	DB_Ctrl_dev_H3K27me3_P39_vs_E14_up_3565|5.39|2.37|3.02	0	.
chr8	26674799	26679599	DB_Ctrl_dev_H3K27me3_P39_vs_E14_up_3566|5.27|2.46|2.81	0	.
chr7	83635999	83640399	DB_Ctrl_dev_H3K27me3_P39_vs_E14_up_3568|5.62|3.25|2.37	0	.
chr1	190575799	190583799	DB_Ctrl_dev_H3K27me3_P39_vs_E14_up_3569|6.24|4.6|1.64	0	.
chr14	76375799	76381999	DB_Ctrl_dev_H3K27me3_P39_vs_E14_up_3579|5.67|3.46|2.21	0	.
chr10	24716599	24721599	DB_Ctrl_dev_H3K27me3_P39_vs_E14_up_3580|5.73|3.49|2.24	0	.
chr6	97521799	97525999	DB_Ctrl_dev_H3K27me3_P39_vs_E14_up_3581|5.82|3.81|2	0	.
chr4	55875999	55878999	DB_Ctrl_dev_H3K27me3_P39_vs_E14_up_3585|4.82|-0.2|5.02	0	.
chr1	138565199	138568999	DB_Ctrl_dev_H3K27me3_P39_vs_E14_up_3587|5.11|1.92|3.2	0	.
chr3	31779199	31783799	DB_Ctrl_dev_H3K27me3_P39_vs_E14_up_3590|4.84|-0.2|5.04	0	.
chr11	102814399	102818199	DB_Ctrl_dev_H3K27me3_P39_vs_E14_up_3595|4.82|-0.2|5.02	0	.
chr14	36251399	36259999	DB_Ctrl_dev_H3K27me3_P39_vs_E14_up_3596|5.93|3.95|1.98	0	.
chr4	84759999	84771199	DB_Ctrl_dev_H3K27me3_P39_vs_E14_up_3597|6.73|5.39|1.34	0	.
chr12	71767199	71774999	DB_Ctrl_dev_H3K27me3_P39_vs_E14_up_3608|6.11|3.91|2.21	0	.
chr19	35446999	35453599	DB_Ctrl_dev_H3K27me3_P39_vs_E14_up_3609|5.39|2.37|3.02	0	.
chr5	133820999	133827599	DB_Ctrl_dev_H3K27me3_P39_vs_E14_up_3610|5.42|2.61|2.81	0	.
chr3	95900599	95908199	DB_Ctrl_dev_H3K27me3_P39_vs_E14_up_3612|6.82|5.48|1.34	0	.
chr2	160245199	160251599	DB_Ctrl_dev_H3K27me3_P39_vs_E14_up_3614|5.92|3.9|2.02	0	.
chr6	48893999	48910799	DB_Ctrl_dev_H3K27me3_P39_vs_E14_up_3618|6.94|5.51|1.43	0	.
chr6	50910599	50916199	DB_Ctrl_dev_H3K27me3_P39_vs_E14_up_3621|5.89|3.99|1.9	0	.
chr15	11303599	11309599	DB_Ctrl_dev_H3K27me3_P39_vs_E14_up_3622|5.48|2.69|2.79	0	.
chr1	113573599	113577999	DB_Ctrl_dev_H3K27me3_P39_vs_E14_up_3627|5.24|2|3.24	0	.
chr9	90827599	90832599	DB_Ctrl_dev_H3K27me3_P39_vs_E14_up_3634|5.65|3.33|2.31	0	.
chr1	122581599	122586799	DB_Ctrl_dev_H3K27me3_P39_vs_E14_up_3635|5.19|2.22|2.98	0	.
chr1	188654599	188661599	DB_Ctrl_dev_H3K27me3_P39_vs_E14_up_3640|6.17|4.43|1.74	0	.
chr18	5148199	5153799	DB_Ctrl_dev_H3K27me3_P39_vs_E14_up_3642|5.72|3.49|2.24	0	.
chr5	66034799	66040999	DB_Ctrl_dev_H3K27me3_P39_vs_E14_up_3644|5.45|2.91|2.54	0	.
chr18	22130399	22136599	DB_Ctrl_dev_H3K27me3_P39_vs_E14_up_3648|5.67|3.55|2.13	0	.
chr6	140685799	140692199	DB_Ctrl_dev_H3K27me3_P39_vs_E14_up_3651|6.22|4.5|1.72	0	.
chr11	91587799	91590999	DB_Ctrl_dev_H3K27me3_P39_vs_E14_up_3653|4.79|-0.2|5	0	.
chr1	88513399	88521399	DB_Ctrl_dev_H3K27me3_P39_vs_E14_up_3655|5.82|3.75|2.07	0	.
chr11	18542999	18546799	DB_Ctrl_dev_H3K27me3_P39_vs_E14_up_3659|4.79|-0.2|5	0	.
chr2	116690399	116694399	DB_Ctrl_dev_H3K27me3_P39_vs_E14_up_3660|5.4|2.65|2.74	0	.
chr6	126316799	126333199	DB_Ctrl_dev_H3K27me3_P39_vs_E14_up_3661|7.1|5.96|1.15	0	.
chr3	49863599	49868199	DB_Ctrl_dev_H3K27me3_P39_vs_E14_up_3663|5.36|2.8|2.56	0	.
chr8	113911399	113917199	DB_Ctrl_dev_H3K27me3_P39_vs_E14_up_3665|5.82|3.86|1.96	0	.
chr1	68899999	68902599	DB_Ctrl_dev_H3K27me3_P39_vs_E14_up_3671|4.79|-0.2|5	0	.
chr4	8877799	8882799	DB_Ctrl_dev_H3K27me3_P39_vs_E14_up_3682|5.67|3.46|2.21	0	.
chr2	50583999	50589999	DB_Ctrl_dev_H3K27me3_P39_vs_E14_up_3687|5.75|3.73|2.03	0	.
chr5	97235599	97239999	DB_Ctrl_dev_H3K27me3_P39_vs_E14_up_3688|5.43|2.48|2.95	0	.
chr9	77659199	77665599	DB_Ctrl_dev_H3K27me3_P39_vs_E14_up_3689|5.81|3.8|2	0	.
chr6	73630399	73635799	DB_Ctrl_dev_H3K27me3_P39_vs_E14_up_3690|4.89|1.09|3.81	0	.
chr8	114280799	114293399	DB_Ctrl_dev_H3K27me3_P39_vs_E14_up_3693|7.06|5.85|1.22	0	.
chr9	77589799	77602199	DB_Ctrl_dev_H3K27me3_P39_vs_E14_up_3694|7.18|6.04|1.14	0	.
chr17	74968799	74972599	DB_Ctrl_dev_H3K27me3_P39_vs_E14_up_3699|5.18|2.22|2.96	0	.
chr13	111987199	111997999	DB_Ctrl_dev_H3K27me3_P39_vs_E14_up_3701|6.84|5.42|1.41	0	.
chr9	77603399	77608599	DB_Ctrl_dev_H3K27me3_P39_vs_E14_up_3711|5.67|3.43|2.23	0	.
chr17	35048799	35052599	DB_Ctrl_dev_H3K27me3_P39_vs_E14_up_3713|5.78|3.8|1.98	0	.
chr3	83438799	83442199	DB_Ctrl_dev_H3K27me3_P39_vs_E14_up_3716|5.2|2.19|3.01	0	.
chr2	38454599	38463599	DB_Ctrl_dev_H3K27me3_P39_vs_E14_up_3718|6.4|4.86|1.53	0	.
chr13	31241999	31249199	DB_Ctrl_dev_H3K27me3_P39_vs_E14_up_3724|5.97|4.16|1.81	0	.
chr4	125915199	125937599	DB_Ctrl_dev_H3K27me3_P39_vs_E14_up_3726|7.75|6.89|0.86	0	.
chr16	71348199	71351199	DB_Ctrl_dev_H3K27me3_P39_vs_E14_up_3730|4.82|0.8|4.02	0	.
chr8	89425799	89434799	DB_Ctrl_dev_H3K27me3_P39_vs_E14_up_3733|6.49|4.98|1.51	0	.
chr9	118338599	118342399	DB_Ctrl_dev_H3K27me3_P39_vs_E14_up_3734|5.73|3.34|2.39	0	.
chr6	6068399	6074999	DB_Ctrl_dev_H3K27me3_P39_vs_E14_up_3736|5.25|2.49|2.77	0	.
chr16	93531999	93536199	DB_Ctrl_dev_H3K27me3_P39_vs_E14_up_3738|5.51|3.17|2.34	0	.
chr11	101509999	101512799	DB_Ctrl_dev_H3K27me3_P39_vs_E14_up_3739|4.8|0.43|4.37	0	.
chr6	82575199	82577199	DB_Ctrl_dev_H3K27me3_P39_vs_E14_up_3743|4.79|0.33|4.46	0	.
chr18	14034399	14048199	DB_Ctrl_dev_H3K27me3_P39_vs_E14_up_3747|6.94|5.61|1.33	0	.
chr9	24971399	24976799	DB_Ctrl_dev_H3K27me3_P39_vs_E14_up_3748|6.31|4.72|1.59	0	.
chr6	53599599	53602799	DB_Ctrl_dev_H3K27me3_P39_vs_E14_up_3749|4.77|-0.2|4.97	0	.
chr11	34479799	34488599	DB_Ctrl_dev_H3K27me3_P39_vs_E14_up_3754|6.06|4.05|2	0	.
chr9	47056399	47064399	DB_Ctrl_dev_H3K27me3_P39_vs_E14_up_3757|6.35|4.74|1.61	0	.
chr11	34374399	34380999	DB_Ctrl_dev_H3K27me3_P39_vs_E14_up_3759|6.1|3.98|2.13	0	.
chr4	97278999	97282399	DB_Ctrl_dev_H3K27me3_P39_vs_E14_up_3762|4.77|-0.2|4.97	0	.
chr12	73436999	73444199	DB_Ctrl_dev_H3K27me3_P39_vs_E14_up_3765|6.47|4.94|1.53	0	.
chr3	147856599	147860799	DB_Ctrl_dev_H3K27me3_P39_vs_E14_up_3767|4.79|-0.2|4.99	0	.
chr9	77491399	77497399	DB_Ctrl_dev_H3K27me3_P39_vs_E14_up_3770|5.81|3.83|1.98	0	.
chr9	117208799	117216599	DB_Ctrl_dev_H3K27me3_P39_vs_E14_up_3775|6.12|4.4|1.72	0	.
chr18	52673799	52680399	DB_Ctrl_dev_H3K27me3_P39_vs_E14_up_3776|6.18|4.49|1.68	0	.
chr12	106306599	106312799	DB_Ctrl_dev_H3K27me3_P39_vs_E14_up_3777|5.9|4|1.91	0	.
chr12	106375399	106380999	DB_Ctrl_dev_H3K27me3_P39_vs_E14_up_3781|6.04|4.29|1.75	0	.
chr11	10055599	10063599	DB_Ctrl_dev_H3K27me3_P39_vs_E14_up_3784|5.82|3.78|2.04	0	.
chr2	145689199	145699199	DB_Ctrl_dev_H3K27me3_P39_vs_E14_up_3785|6.46|4.89|1.56	0	.
chr18	13679999	13688599	DB_Ctrl_dev_H3K27me3_P39_vs_E14_up_3786|6.85|5.52|1.32	0	.
chr18	13794599	13802999	DB_Ctrl_dev_H3K27me3_P39_vs_E14_up_3787|6.55|4.96|1.59	0	.
chr10	121087199	121091599	DB_Ctrl_dev_H3K27me3_P39_vs_E14_up_3788|5.82|3.86|1.96	0	.
chr12	72514799	72520999	DB_Ctrl_dev_H3K27me3_P39_vs_E14_up_3790|5.36|2.78|2.58	0	.
chr12	47670399	47677799	DB_Ctrl_dev_H3K27me3_P39_vs_E14_up_3792|5.64|3.47|2.18	0	.
chr8	115221199	115226599	DB_Ctrl_dev_H3K27me3_P39_vs_E14_up_3795|5.8|3.57|2.24	0	.
chr4	55974999	55980799	DB_Ctrl_dev_H3K27me3_P39_vs_E14_up_3797|5.54|3.11|2.43	0	.
chr15	71355999	71360999	DB_Ctrl_dev_H3K27me3_P39_vs_E14_up_3799|4.85|0.72|4.12	0	.
chr12	69448199	69457199	DB_Ctrl_dev_H3K27me3_P39_vs_E14_up_3806|6.56|5.16|1.4	0	.
chr10	96716399	96725599	DB_Ctrl_dev_H3K27me3_P39_vs_E14_up_3808|6.41|4.89|1.52	0	.
chr9	77481799	77489999	DB_Ctrl_dev_H3K27me3_P39_vs_E14_up_3810|6.31|4.72|1.59	0	.
chr15	56075599	56079199	DB_Ctrl_dev_H3K27me3_P39_vs_E14_up_3811|4.76|0.33|4.43	0	.
chr18	13777399	13793799	DB_Ctrl_dev_H3K27me3_P39_vs_E14_up_3815|7.02|5.53|1.49	0	.
chr7	51621599	51632799	DB_Ctrl_dev_H3K27me3_P39_vs_E14_up_3817|6.78|5.36|1.42	0	.
chr14	33880199	33891799	DB_Ctrl_dev_H3K27me3_P39_vs_E14_up_3818|6.4|4.9|1.51	0	.
chr6	65854599	65860199	DB_Ctrl_dev_H3K27me3_P39_vs_E14_up_3823|5.36|2.37|2.99	0	.
chr12	56975799	56990199	DB_Ctrl_dev_H3K27me3_P39_vs_E14_up_3826|7.02|5.82|1.2	0	.
chr13	112008199	112017399	DB_Ctrl_dev_H3K27me3_P39_vs_E14_up_3829|6.56|5.04|1.52	0	.
chr1	62174399	62180799	DB_Ctrl_dev_H3K27me3_P39_vs_E14_up_3830|5.78|3.57|2.21	0	.
chr1	92736399	92739999	DB_Ctrl_dev_H3K27me3_P39_vs_E14_up_3831|5.47|2.85|2.62	0	.
chr14	103992399	103996799	DB_Ctrl_dev_H3K27me3_P39_vs_E14_up_3834|4.74|-0.2|4.94	0	.
chr8	89582999	89588399	DB_Ctrl_dev_H3K27me3_P39_vs_E14_up_3835|5.25|2.13|3.12	0	.
chr11	8560799	8565199	DB_Ctrl_dev_H3K27me3_P39_vs_E14_up_3836|4.97|1.28|3.68	0	.
chr5	37460199	37469999	DB_Ctrl_dev_H3K27me3_P39_vs_E14_up_3839|6.47|4.92|1.55	0	.
chr17	69468799	69477199	DB_Ctrl_dev_H3K27me3_P39_vs_E14_up_3841|6.55|5.15|1.4	0	.
chr5	110964999	110969199	DB_Ctrl_dev_H3K27me3_P39_vs_E14_up_3842|4.74|-0.2|4.94	0	.
chr13	112209399	112224599	DB_Ctrl_dev_H3K27me3_P39_vs_E14_up_3845|7.38|6.28|1.1	0	.
chr6	49153399	49161199	DB_Ctrl_dev_H3K27me3_P39_vs_E14_up_3846|5.95|4.12|1.83	0	.
chr10	94462399	94468399	DB_Ctrl_dev_H3K27me3_P39_vs_E14_up_3847|5.29|2.42|2.87	0	.
chr7	71315399	71320199	DB_Ctrl_dev_H3K27me3_P39_vs_E14_up_3852|5.6|3.45|2.15	0	.
chr5	127515599	127518599	DB_Ctrl_dev_H3K27me3_P39_vs_E14_up_3854|5.01|1.66|3.34	0	.
chr13	103921599	103927599	DB_Ctrl_dev_H3K27me3_P39_vs_E14_up_3870|6.16|4.5|1.66	0	.
chr16	25043399	25049199	DB_Ctrl_dev_H3K27me3_P39_vs_E14_up_3872|5.9|3.99|1.91	0	.
chr1	173823199	173827799	DB_Ctrl_dev_H3K27me3_P39_vs_E14_up_3873|4.94|1.43|3.51	0	.
chr8	24625799	24629799	DB_Ctrl_dev_H3K27me3_P39_vs_E14_up_3878|5.49|3.04|2.45	0	.
chr9	77448399	77455999	DB_Ctrl_dev_H3K27me3_P39_vs_E14_up_3880|5.99|4.2|1.78	0	.
chr14	59073199	59077599	DB_Ctrl_dev_H3K27me3_P39_vs_E14_up_3882|5.41|2.98|2.43	0	.
chr12	48452399	48455199	DB_Ctrl_dev_H3K27me3_P39_vs_E14_up_3887|4.74|-0.2|4.94	0	.
chr2	167777399	167780399	DB_Ctrl_dev_H3K27me3_P39_vs_E14_up_3889|5.2|2.36|2.84	0	.
chr10	37992599	37997799	DB_Ctrl_dev_H3K27me3_P39_vs_E14_up_3891|4.74|0.43|4.31	0	.
chr12	39064599	39068599	DB_Ctrl_dev_H3K27me3_P39_vs_E14_up_3893|5.2|2|3.2	0	.
chr19	47967199	47972399	DB_Ctrl_dev_H3K27me3_P39_vs_E14_up_3898|6.09|4.29|1.8	0	.
chr17	86946999	86952999	DB_Ctrl_dev_H3K27me3_P39_vs_E14_up_3900|6.16|4.45|1.7	0	.
chr5	110931199	110935799	DB_Ctrl_dev_H3K27me3_P39_vs_E14_up_3902|5.33|2.78|2.55	0	.
chr7	82334199	82346799	DB_Ctrl_dev_H3K27me3_P39_vs_E14_up_3904|6.92|5.6|1.31	0	.
chr12	118591799	118599399	DB_Ctrl_dev_H3K27me3_P39_vs_E14_up_3905|6.74|5.47|1.27	0	.
chr2	114039399	114043599	DB_Ctrl_dev_H3K27me3_P39_vs_E14_up_3906|5.51|3.23|2.28	0	.
chr6	141572799	141575799	DB_Ctrl_dev_H3K27me3_P39_vs_E14_up_3913|4.76|0.43|4.34	0	.
chr13	112061999	112068999	DB_Ctrl_dev_H3K27me3_P39_vs_E14_up_3917|6.62|5.03|1.6	0	.
chr6	87586999	87591199	DB_Ctrl_dev_H3K27me3_P39_vs_E14_up_3918|5.81|3.85|1.96	0	.
chr12	68248399	68252199	DB_Ctrl_dev_H3K27me3_P39_vs_E14_up_3920|4.76|-0.2|4.97	0	.
chr10	92323999	92326199	DB_Ctrl_dev_H3K27me3_P39_vs_E14_up_3922|4.87|1.15|3.73	0	.
chr8	35420399	35425399	DB_Ctrl_dev_H3K27me3_P39_vs_E14_up_3923|5.88|4.01|1.87	0	.
chr18	64308399	64312999	DB_Ctrl_dev_H3K27me3_P39_vs_E14_up_3924|5.34|2.76|2.58	0	.
chr9	71352799	71361399	DB_Ctrl_dev_H3K27me3_P39_vs_E14_up_3929|5.88|3.9|1.98	0	.
chr3	44696599	44699599	DB_Ctrl_dev_H3K27me3_P39_vs_E14_up_3930|4.71|-0.2|4.92	0	.
chr3	125779399	125782399	DB_Ctrl_dev_H3K27me3_P39_vs_E14_up_3931|4.71|-0.2|4.92	0	.
chr6	141337399	141341599	DB_Ctrl_dev_H3K27me3_P39_vs_E14_up_3932|4.71|-0.2|4.92	0	.
chr3	15129199	15133399	DB_Ctrl_dev_H3K27me3_P39_vs_E14_up_3934|5.3|2.67|2.63	0	.
chr13	15704399	15708999	DB_Ctrl_dev_H3K27me3_P39_vs_E14_up_3935|4.71|-0.2|4.92	0	.
chr7	128829999	128835799	DB_Ctrl_dev_H3K27me3_P39_vs_E14_up_3938|6.11|4.4|1.71	0	.
chr18	46891799	46900799	DB_Ctrl_dev_H3K27me3_P39_vs_E14_up_3941|6.12|4.39|1.73	0	.
chr8	116401599	116404599	DB_Ctrl_dev_H3K27me3_P39_vs_E14_up_3944|4.71|-0.2|4.92	0	.
chr17	78505199	78510399	DB_Ctrl_dev_H3K27me3_P39_vs_E14_up_3945|5.68|3.62|2.07	0	.
chr12	47217599	47226199	DB_Ctrl_dev_H3K27me3_P39_vs_E14_up_3949|5.66|3.49|2.17	0	.
chr16	83681999	83685599	DB_Ctrl_dev_H3K27me3_P39_vs_E14_up_3957|4.74|-0.2|4.95	0	.
chr1	186278199	186283599	DB_Ctrl_dev_H3K27me3_P39_vs_E14_up_3971|5.46|3.06|2.4	0	.
chr15	63186199	63189399	DB_Ctrl_dev_H3K27me3_P39_vs_E14_up_3974|4.74|-0.2|4.94	0	.
chr11	38598799	38604599	DB_Ctrl_dev_H3K27me3_P39_vs_E14_up_3979|5.37|2.84|2.53	0	.
chr7	137719799	137726799	DB_Ctrl_dev_H3K27me3_P39_vs_E14_up_3980|6.11|4.37|1.73	0	.
chr5	26876199	26878799	DB_Ctrl_dev_H3K27me3_P39_vs_E14_up_3981|4.71|0.33|4.38	0	.
chr6	130855799	130861199	DB_Ctrl_dev_H3K27me3_P39_vs_E14_up_3983|5.23|2.13|3.1	0	.
chr9	14713799	14720199	DB_Ctrl_dev_H3K27me3_P39_vs_E14_up_3984|6.06|4.34|1.72	0	.
chr2	137662199	137675399	DB_Ctrl_dev_H3K27me3_P39_vs_E14_up_3987|6.77|5.39|1.38	0	.
chr7	115841999	115846199	DB_Ctrl_dev_H3K27me3_P39_vs_E14_up_3989|5.14|2.22|2.92	0	.
chr4	62814399	62821199	DB_Ctrl_dev_H3K27me3_P39_vs_E14_up_3995|5.61|3.47|2.14	0	.
chr9	117217599	117224799	DB_Ctrl_dev_H3K27me3_P39_vs_E14_up_3997|6.01|3.95|2.06	0	.
chr13	32453199	32462399	DB_Ctrl_dev_H3K27me3_P39_vs_E14_up_3998|6.29|4.47|1.82	0	.
chr3	154563799	154577399	DB_Ctrl_dev_H3K27me3_P39_vs_E14_up_3999|7.38|6.36|1.02	0	.
chr8	41054199	41057999	DB_Ctrl_dev_H3K27me3_P39_vs_E14_up_4000|5.2|2|3.2	0	.
chr7	51779199	51786599	DB_Ctrl_dev_H3K27me3_P39_vs_E14_up_4001|5.86|3.7|2.15	0	.
chr15	6945999	6954399	DB_Ctrl_dev_H3K27me3_P39_vs_E14_up_4003|5.86|3.7|2.15	0	.
chr1	144539399	144542199	DB_Ctrl_dev_H3K27me3_P39_vs_E14_up_4004|4.71|-0.2|4.91	0	.
chr15	11081399	11092199	DB_Ctrl_dev_H3K27me3_P39_vs_E14_up_4007|6.34|4.46|1.89	0	.
chr4	105424399	105429799	DB_Ctrl_dev_H3K27me3_P39_vs_E14_up_4011|5.17|2|3.17	0	.
chr16	43601999	43612199	DB_Ctrl_dev_H3K27me3_P39_vs_E14_up_4020|6.51|5.07|1.44	0	.
chr18	13883999	13900799	DB_Ctrl_dev_H3K27me3_P39_vs_E14_up_4023|7.55|4.84|2.71	0	.
chr15	29060199	29064799	DB_Ctrl_dev_H3K27me3_P39_vs_E14_up_4025|5.22|2.38|2.84	0	.
chr3	131155399	131166199	DB_Ctrl_dev_H3K27me3_P39_vs_E14_up_4026|6.8|5.57|1.23	0	.
chr18	44772399	44776799	DB_Ctrl_dev_H3K27me3_P39_vs_E14_up_4028|5.69|3.61|2.08	0	.
chr7	93076399	93081599	DB_Ctrl_dev_H3K27me3_P39_vs_E14_up_4029|6.4|4.88|1.52	0	.
chr10	115748199	115752599	DB_Ctrl_dev_H3K27me3_P39_vs_E14_up_4031|4.92|1.28|3.63	0	.
chr8	89777999	89787799	DB_Ctrl_dev_H3K27me3_P39_vs_E14_up_4036|7.09|6|1.09	0	.
chr13	71066599	71071399	DB_Ctrl_dev_H3K27me3_P39_vs_E14_up_4044|5.63|3.51|2.11	0	.
chr3	114335799	114341199	DB_Ctrl_dev_H3K27me3_P39_vs_E14_up_4046|5.09|2.06|3.03	0	.
chr9	118291999	118295599	DB_Ctrl_dev_H3K27me3_P39_vs_E14_up_4047|5.33|2.81|2.51	0	.
chr10	88602399	88608199	DB_Ctrl_dev_H3K27me3_P39_vs_E14_up_4050|5.95|4.18|1.77	0	.
chr9	49232799	49239999	DB_Ctrl_dev_H3K27me3_P39_vs_E14_up_4052|5.64|3.58|2.06	0	.
chr7	37429599	37439199	DB_Ctrl_dev_H3K27me3_P39_vs_E14_up_4055|5.46|2.96|2.5	0	.
chr15	88286999	88294399	DB_Ctrl_dev_H3K27me3_P39_vs_E14_up_4056|6.33|4.81|1.51	0	.
chr9	116902999	116922199	DB_Ctrl_dev_H3K27me3_P39_vs_E14_up_4058|7.56|6.6|0.97	0	.
chr1	167788999	167796199	DB_Ctrl_dev_H3K27me3_P39_vs_E14_up_4059|6.03|4.34|1.69	0	.
chr1	190560399	190565799	DB_Ctrl_dev_H3K27me3_P39_vs_E14_up_4069|6.13|4.31|1.83	0	.
chr18	81017399	81025799	DB_Ctrl_dev_H3K27me3_P39_vs_E14_up_4070|6.18|4.5|1.67	0	.
chr8	116107999	116118399	DB_Ctrl_dev_H3K27me3_P39_vs_E14_up_4071|6.65|5.24|1.41	0	.
chr6	140814399	140825999	DB_Ctrl_dev_H3K27me3_P39_vs_E14_up_4074|6.89|5.69|1.2	0	.
chr11	23952999	23958199	DB_Ctrl_dev_H3K27me3_P39_vs_E14_up_4077|5.49|2.96|2.53	0	.
chr11	34273599	34278599	DB_Ctrl_dev_H3K27me3_P39_vs_E14_up_4078|5.64|3.58|2.06	0	.
chr18	74517999	74522599	DB_Ctrl_dev_H3K27me3_P39_vs_E14_up_4079|5.43|3.1|2.33	0	.
chr12	91678399	91687999	DB_Ctrl_dev_H3K27me3_P39_vs_E14_up_4081|6.69|5.4|1.29	0	.
chr16	43404599	43410599	DB_Ctrl_dev_H3K27me3_P39_vs_E14_up_4082|5.54|2.75|2.78	0	.
chr12	54028399	54032999	DB_Ctrl_dev_H3K27me3_P39_vs_E14_up_4084|5.27|2.26|3.01	0	.
chr12	47592399	47595399	DB_Ctrl_dev_H3K27me3_P39_vs_E14_up_4086|4.69|0.33|4.35	0	.
chr5	68149599	68156199	DB_Ctrl_dev_H3K27me3_P39_vs_E14_up_4089|5.75|3.76|1.99	0	.
chr7	115233999	115240399	DB_Ctrl_dev_H3K27me3_P39_vs_E14_up_4096|5.46|3.18|2.28	0	.
chr9	116772599	116778799	DB_Ctrl_dev_H3K27me3_P39_vs_E14_up_4097|6.16|4.51|1.65	0	.
chr1	167729599	167736399	DB_Ctrl_dev_H3K27me3_P39_vs_E14_up_4100|6.19|4.62|1.57	0	.
chr16	92915199	92922399	DB_Ctrl_dev_H3K27me3_P39_vs_E14_up_4101|5.21|2.13|3.08	0	.
chr2	152047199	152051599	DB_Ctrl_dev_H3K27me3_P39_vs_E14_up_4102|5.99|4.06|1.92	0	.
chr1	62096399	62099399	DB_Ctrl_dev_H3K27me3_P39_vs_E14_up_4104|4.76|0.72|4.04	0	.
chr3	145814599	145819199	DB_Ctrl_dev_H3K27me3_P39_vs_E14_up_4109|5.52|3.31|2.21	0	.
chr7	115555999	115560999	DB_Ctrl_dev_H3K27me3_P39_vs_E14_up_4113|5.63|3.07|2.56	0	.
chr12	53834599	53840199	DB_Ctrl_dev_H3K27me3_P39_vs_E14_up_4117|5.51|3.29|2.22	0	.
chr1	167900599	167913799	DB_Ctrl_dev_H3K27me3_P39_vs_E14_up_4118|6.98|5.83|1.15	0	.
chr3	83536799	83542799	DB_Ctrl_dev_H3K27me3_P39_vs_E14_up_4122|6.05|4.27|1.78	0	.
chr2	172752599	172767199	DB_Ctrl_dev_H3K27me3_P39_vs_E14_up_4128|7.09|6.01|1.09	0	.
chr14	52322399	52331599	DB_Ctrl_dev_H3K27me3_P39_vs_E14_up_4131|6.91|5.74|1.17	0	.
chr5	95871199	95873599	DB_Ctrl_dev_H3K27me3_P39_vs_E14_up_4132|4.69|0.33|4.36	0	.
chr4	8952399	8968999	DB_Ctrl_dev_H3K27me3_P39_vs_E14_up_4137|7.22|6.1|1.12	0	.
chr6	130865799	130868599	DB_Ctrl_dev_H3K27me3_P39_vs_E14_up_4141|4.71|-0.2|4.91	0	.
chr6	50764599	50767399	DB_Ctrl_dev_H3K27me3_P39_vs_E14_up_4144|5.05|1.72|3.32	0	.
chr4	22876399	22882599	DB_Ctrl_dev_H3K27me3_P39_vs_E14_up_4145|5.78|3.84|1.94	0	.
chr13	70131999	70136399	DB_Ctrl_dev_H3K27me3_P39_vs_E14_up_4147|4.69|-0.2|4.89	0	.
chr16	88841199	88851199	DB_Ctrl_dev_H3K27me3_P39_vs_E14_up_4148|6.1|4.28|1.82	0	.
chr5	51282199	51291599	DB_Ctrl_dev_H3K27me3_P39_vs_E14_up_4149|6.2|4.64|1.56	0	.
chr6	141015799	141024599	DB_Ctrl_dev_H3K27me3_P39_vs_E14_up_4151|6.31|4.78|1.52	0	.
chr4	84261999	84274399	DB_Ctrl_dev_H3K27me3_P39_vs_E14_up_4152|6.34|4.8|1.55	0	.
chr6	141089999	141096999	DB_Ctrl_dev_H3K27me3_P39_vs_E14_up_4154|5.9|4.01|1.89	0	.
chr5	77114799	77117399	DB_Ctrl_dev_H3K27me3_P39_vs_E14_up_4158|5.05|1.88|3.17	0	.
chr12	47789399	47793199	DB_Ctrl_dev_H3K27me3_P39_vs_E14_up_4159|4.66|-0.2|4.86	0	.
chr13	47903799	47909399	DB_Ctrl_dev_H3K27me3_P39_vs_E14_up_4160|5.96|4.19|1.78	0	.
chr4	94151199	94157999	DB_Ctrl_dev_H3K27me3_P39_vs_E14_up_4162|6.02|4.28|1.74	0	.
chr1	129968799	129971799	DB_Ctrl_dev_H3K27me3_P39_vs_E14_up_4163|4.76|0.87|3.9	0	.
chr3	148557399	148561199	DB_Ctrl_dev_H3K27me3_P39_vs_E14_up_4165|4.88|0.87|4.01	0	.
chr12	91637399	91646799	DB_Ctrl_dev_H3K27me3_P39_vs_E14_up_4166|6.19|4.53|1.66	0	.
chr16	83707599	83711999	DB_Ctrl_dev_H3K27me3_P39_vs_E14_up_4178|4.66|-0.2|4.86	0	.
chr10	92886799	92891399	DB_Ctrl_dev_H3K27me3_P39_vs_E14_up_4179|5.71|3.52|2.19	0	.
chr17	52909799	52912799	DB_Ctrl_dev_H3K27me3_P39_vs_E14_up_4180|4.79|1.09|3.7	0	.
chr3	145849399	145859599	DB_Ctrl_dev_H3K27me3_P39_vs_E14_up_4182|6.44|4.77|1.67	0	.
chr19	55764399	55769599	DB_Ctrl_dev_H3K27me3_P39_vs_E14_up_4183|5.92|4.07|1.85	0	.
chr15	6318199	6324999	DB_Ctrl_dev_H3K27me3_P39_vs_E14_up_4184|6.26|4.63|1.64	0	.
chr2	59777399	59781199	DB_Ctrl_dev_H3K27me3_P39_vs_E14_up_4185|5.32|2.37|2.95	0	.
chr8	89383999	89391599	DB_Ctrl_dev_H3K27me3_P39_vs_E14_up_4186|6.23|4.64|1.6	0	.
chr18	62891799	62896399	DB_Ctrl_dev_H3K27me3_P39_vs_E14_up_4187|5.29|2.26|3.03	0	.
chr6	78270199	78274999	DB_Ctrl_dev_H3K27me3_P39_vs_E14_up_4188|5.17|2|3.17	0	.
chr6	97559999	97563599	DB_Ctrl_dev_H3K27me3_P39_vs_E14_up_4189|5.31|2.5|2.81	0	.
chr3	129737999	129740399	DB_Ctrl_dev_H3K27me3_P39_vs_E14_up_4190|4.66|-0.2|4.86	0	.
chr10	93696799	93702799	DB_Ctrl_dev_H3K27me3_P39_vs_E14_up_4194|6.39|4.77|1.62	0	.
chr4	124231199	124244399	DB_Ctrl_dev_H3K27me3_P39_vs_E14_up_4197|6.96|5.7|1.26	0	.
chr2	169558799	169565799	DB_Ctrl_dev_H3K27me3_P39_vs_E14_up_4200|5.6|3.15|2.45	0	.
chr9	117391799	117405199	DB_Ctrl_dev_H3K27me3_P39_vs_E14_up_4204|6.75|5.46|1.29	0	.
chr10	60803399	60817399	DB_Ctrl_dev_H3K27me3_P39_vs_E14_up_4205|7.33|6.31|1.02	0	.
chr1	184580599	184589799	DB_Ctrl_dev_H3K27me3_P39_vs_E14_up_4207|6.25|4.7|1.55	0	.
chr1	190416399	190429799	DB_Ctrl_dev_H3K27me3_P39_vs_E14_up_4216|7.49|6.4|1.1	0	.
chr12	47969799	47974599	DB_Ctrl_dev_H3K27me3_P39_vs_E14_up_4217|5.19|2.4|2.79	0	.
chr1	5385599	5389999	DB_Ctrl_dev_H3K27me3_P39_vs_E14_up_4218|4.66|0.33|4.32	0	.
chr5	13326399	13328999	DB_Ctrl_dev_H3K27me3_P39_vs_E14_up_4219|4.66|0.33|4.32	0	.
chr8	127016199	127028399	DB_Ctrl_dev_H3K27me3_P39_vs_E14_up_4221|6.69|5.4|1.29	0	.
chr2	10919999	10924999	DB_Ctrl_dev_H3K27me3_P39_vs_E14_up_4223|6.16|4.58|1.58	0	.
chr19	14334799	14341999	DB_Ctrl_dev_H3K27me3_P39_vs_E14_up_4224|6.16|4.44|1.72	0	.
chr18	55963199	55967599	DB_Ctrl_dev_H3K27me3_P39_vs_E14_up_4225|4.89|1.03|3.86	0	.
chr9	35397999	35403599	DB_Ctrl_dev_H3K27me3_P39_vs_E14_up_4228|6.22|4.65|1.56	0	.
chr17	43537199	43541199	DB_Ctrl_dev_H3K27me3_P39_vs_E14_up_4231|4.92|1.62|3.29	0	.
chr2	57137999	57140799	DB_Ctrl_dev_H3K27me3_P39_vs_E14_up_4233|4.66|-0.2|4.87	0	.
chr2	146107999	146113199	DB_Ctrl_dev_H3K27me3_P39_vs_E14_up_4238|6.08|4.38|1.71	0	.
chr6	141372999	141379199	DB_Ctrl_dev_H3K27me3_P39_vs_E14_up_4240|5.74|3.81|1.93	0	.
chr9	73428199	73432799	DB_Ctrl_dev_H3K27me3_P39_vs_E14_up_4245|5.25|2.26|2.99	0	.
chr2	22122999	22126999	DB_Ctrl_dev_H3K27me3_P39_vs_E14_up_4247|5.29|2.66|2.63	0	.
chr5	26693999	26696799	DB_Ctrl_dev_H3K27me3_P39_vs_E14_up_4251|4.63|-0.2|4.83	0	.
chr2	25372199	25374599	DB_Ctrl_dev_H3K27me3_P39_vs_E14_up_4253|4.63|-0.2|4.83	0	.
chr4	49888999	49891999	DB_Ctrl_dev_H3K27me3_P39_vs_E14_up_4258|4.74|0.72|4.01	0	.
chr17	7539399	7543399	DB_Ctrl_dev_H3K27me3_P39_vs_E14_up_4259|4.63|-0.2|4.83	0	.
chr10	22777399	22784999	DB_Ctrl_dev_H3K27me3_P39_vs_E14_up_4261|6.19|4.56|1.62	0	.
chr16	78929599	78934799	DB_Ctrl_dev_H3K27me3_P39_vs_E14_up_4268|5.74|3.8|1.95	0	.
chr1	40966599	40972799	DB_Ctrl_dev_H3K27me3_P39_vs_E14_up_4272|6|4.2|1.8	0	.
chr18	57266999	57272599	DB_Ctrl_dev_H3K27me3_P39_vs_E14_up_4273|5.78|3.77|2	0	.
chr16	86543999	86548999	DB_Ctrl_dev_H3K27me3_P39_vs_E14_up_4274|5.19|2.13|3.06	0	.
chr9	116949399	116953599	DB_Ctrl_dev_H3K27me3_P39_vs_E14_up_4280|5.21|2.6|2.61	0	.
chr18	74583999	74591399	DB_Ctrl_dev_H3K27me3_P39_vs_E14_up_4282|6.6|5.23|1.37	0	.
chr6	48193199	48198799	DB_Ctrl_dev_H3K27me3_P39_vs_E14_up_4284|6.13|4.45|1.68	0	.
chr6	5378399	5381799	DB_Ctrl_dev_H3K27me3_P39_vs_E14_up_4285|4.85|1.03|3.82	0	.
chr12	118539599	118546199	DB_Ctrl_dev_H3K27me3_P39_vs_E14_up_4286|5.91|4.03|1.88	0	.
chr5	75574399	75579199	DB_Ctrl_dev_H3K27me3_P39_vs_E14_up_4293|5.76|3.84|1.92	0	.
chr5	26804199	26824599	DB_Ctrl_dev_H3K27me3_P39_vs_E14_up_4296|7.64|6.67|0.97	0	.
chr11	19051999	19061399	DB_Ctrl_dev_H3K27me3_P39_vs_E14_up_4297|6.24|4.67|1.57	0	.
chr5	67203399	67206199	DB_Ctrl_dev_H3K27me3_P39_vs_E14_up_4299|4.69|0.43|4.26	0	.
chr19	24354199	24359799	DB_Ctrl_dev_H3K27me3_P39_vs_E14_up_4302|4.82|1.03|3.79	0	.
chr1	61353199	61361599	DB_Ctrl_dev_H3K27me3_P39_vs_E14_up_4304|6.03|4.35|1.68	0	.
chr5	127346999	127352599	DB_Ctrl_dev_H3K27me3_P39_vs_E14_up_4305|5.39|2.57|2.82	0	.
chr11	34388399	34408199	DB_Ctrl_dev_H3K27me3_P39_vs_E14_up_4307|7.6|6.61|1	0	.
chr8	115682399	115692199	DB_Ctrl_dev_H3K27me3_P39_vs_E14_up_4308|6.85|5.44|1.41	0	.
chr17	88129199	88135799	DB_Ctrl_dev_H3K27me3_P39_vs_E14_up_4310|5.29|2.5|2.79	0	.
chr10	92101399	92105999	DB_Ctrl_dev_H3K27me3_P39_vs_E14_up_4313|5.27|2.63|2.64	0	.
chr9	12436799	12440199	DB_Ctrl_dev_H3K27me3_P39_vs_E14_up_4315|4.63|-0.2|4.83	0	.
chr10	82488399	82493199	DB_Ctrl_dev_H3K27me3_P39_vs_E14_up_4316|5.09|1.69|3.4	0	.
chr11	34302599	34309399	DB_Ctrl_dev_H3K27me3_P39_vs_E14_up_4321|6.16|4.54|1.62	0	.
chr18	83567799	83580999	DB_Ctrl_dev_H3K27me3_P39_vs_E14_up_4324|7.15|6.12|1.03	0	.
chr12	54041199	54044799	DB_Ctrl_dev_H3K27me3_P39_vs_E14_up_4326|5.22|2.23|2.99	0	.
chr3	147654799	147659599	DB_Ctrl_dev_H3K27me3_P39_vs_E14_up_4328|4.96|1.66|3.3	0	.
chr16	23909799	23913599	DB_Ctrl_dev_H3K27me3_P39_vs_E14_up_4329|5.29|2.65|2.64	0	.
chr9	117089199	117093399	DB_Ctrl_dev_H3K27me3_P39_vs_E14_up_4332|5.69|3.64|2.04	0	.
chr13	15479999	15484799	DB_Ctrl_dev_H3K27me3_P39_vs_E14_up_4335|4.82|1.2|3.62	0	.
chr10	120629999	120640199	DB_Ctrl_dev_H3K27me3_P39_vs_E14_up_4336|6.9|5.69|1.21	0	.
chr2	79150999	79154799	DB_Ctrl_dev_H3K27me3_P39_vs_E14_up_4339|4.63|0.33|4.3	0	.
chr9	84723999	84728599	DB_Ctrl_dev_H3K27me3_P39_vs_E14_up_4340|4.63|-0.2|4.83	0	.
chr18	14387799	14395599	DB_Ctrl_dev_H3K27me3_P39_vs_E14_up_4341|5.87|4.01|1.86	0	.
chr18	88784199	88786599	DB_Ctrl_dev_H3K27me3_P39_vs_E14_up_4342|4.63|0.33|4.3	0	.
chr2	79017599	79021999	DB_Ctrl_dev_H3K27me3_P39_vs_E14_up_4344|5.07|1.85|3.22	0	.
chr2	9187999	9193399	DB_Ctrl_dev_H3K27me3_P39_vs_E14_up_4346|5.57|3.24|2.34	0	.
chr2	73442399	73448799	DB_Ctrl_dev_H3K27me3_P39_vs_E14_up_4347|5.22|2.13|3.08	0	.
chr3	121635799	121638399	DB_Ctrl_dev_H3K27me3_P39_vs_E14_up_4348|4.77|1.09|3.68	0	.
chr2	76968599	76972199	DB_Ctrl_dev_H3K27me3_P39_vs_E14_up_4350|4.91|1.28|3.63	0	.
chr9	40986799	40994799	DB_Ctrl_dev_H3K27me3_P39_vs_E14_up_4354|5.59|3.43|2.16	0	.
chr10	39320199	39323399	DB_Ctrl_dev_H3K27me3_P39_vs_E14_up_4355|4.69|-0.2|4.9	0	.
chr4	91558199	91562799	DB_Ctrl_dev_H3K27me3_P39_vs_E14_up_4357|5.18|2.43|2.75	0	.
chr9	89650399	89660599	DB_Ctrl_dev_H3K27me3_P39_vs_E14_up_4361|6.46|5.06|1.4	0	.
chr1	69134399	69138999	DB_Ctrl_dev_H3K27me3_P39_vs_E14_up_4362|5.3|2.61|2.69	0	.
chr9	77576399	77588799	DB_Ctrl_dev_H3K27me3_P39_vs_E14_up_4363|6.77|5.56|1.21	0	.
chr9	75773399	75779199	DB_Ctrl_dev_H3K27me3_P39_vs_E14_up_4364|5.15|2|3.15	0	.
chr9	89526199	89544199	DB_Ctrl_dev_H3K27me3_P39_vs_E14_up_4365|6.85|5.64|1.21	0	.
chr2	21962999	21964799	DB_Ctrl_dev_H3K27me3_P39_vs_E14_up_4366|4.6|-0.2|4.8	0	.
chr18	81707599	81711799	DB_Ctrl_dev_H3K27me3_P39_vs_E14_up_4369|5.71|3.75|1.96	0	.
chr2	137927199	137934599	DB_Ctrl_dev_H3K27me3_P39_vs_E14_up_4370|5.63|3.42|2.21	0	.
chr13	65166399	65169399	DB_Ctrl_dev_H3K27me3_P39_vs_E14_up_4372|4.6|-0.2|4.8	0	.
chr1	186540599	186547999	DB_Ctrl_dev_H3K27me3_P39_vs_E14_up_4373|6.2|4.61|1.58	0	.
chr5	71394199	71399399	DB_Ctrl_dev_H3K27me3_P39_vs_E14_up_4374|5.7|3.77|1.93	0	.
chr2	22392599	22399399	DB_Ctrl_dev_H3K27me3_P39_vs_E14_up_4376|5.56|3.33|2.23	0	.
chr2	174914199	174919399	DB_Ctrl_dev_H3K27me3_P39_vs_E14_up_4377|5.89|4.11|1.78	0	.
chr16	88124199	88134199	DB_Ctrl_dev_H3K27me3_P39_vs_E14_up_4383|6.29|4.55|1.74	0	.
chr1	69148199	69150599	DB_Ctrl_dev_H3K27me3_P39_vs_E14_up_4384|4.6|-0.2|4.81	0	.
chr18	87111399	87114599	DB_Ctrl_dev_H3K27me3_P39_vs_E14_up_4385|4.6|-0.2|4.81	0	.
chr2	64324599	64328799	DB_Ctrl_dev_H3K27me3_P39_vs_E14_up_4386|4.6|-0.2|4.81	0	.
chr10	120249599	120261399	DB_Ctrl_dev_H3K27me3_P39_vs_E14_up_4388|6.79|5.38|1.41	0	.
chr18	74664799	74667199	DB_Ctrl_dev_H3K27me3_P39_vs_E14_up_4389|4.63|0.33|4.29	0	.
chr5	75246799	75248799	DB_Ctrl_dev_H3K27me3_P39_vs_E14_up_4392|4.6|-0.2|4.8	0	.
chr2	135734799	135743199	DB_Ctrl_dev_H3K27me3_P39_vs_E14_up_4393|6.22|4.64|1.57	0	.
chr1	190135599	190146199	DB_Ctrl_dev_H3K27me3_P39_vs_E14_up_4395|6.8|5.58|1.22	0	.
chr14	84642599	84647199	DB_Ctrl_dev_H3K27me3_P39_vs_E14_up_4398|4.77|1.15|3.62	0	.
chr3	31764199	31768599	DB_Ctrl_dev_H3K27me3_P39_vs_E14_up_4399|5.69|3.75|1.93	0	.
chr5	127401199	127406399	DB_Ctrl_dev_H3K27me3_P39_vs_E14_up_4400|6.17|4.59|1.58	0	.
chr2	59613399	59617999	DB_Ctrl_dev_H3K27me3_P39_vs_E14_up_4406|5.59|3.55|2.04	0	.
chr3	116397399	116402799	DB_Ctrl_dev_H3K27me3_P39_vs_E14_up_4407|5.91|3.89|2.02	0	.
chr5	29946399	29956599	DB_Ctrl_dev_H3K27me3_P39_vs_E14_up_4412|6.56|5.19|1.38	0	.
chr19	55834999	55841799	DB_Ctrl_dev_H3K27me3_P39_vs_E14_up_4414|6.25|4.76|1.49	0	.
chr17	67935599	67939399	DB_Ctrl_dev_H3K27me3_P39_vs_E14_up_4415|4.71|0.87|3.85	0	.
chr14	100759799	100765999	DB_Ctrl_dev_H3K27me3_P39_vs_E14_up_4418|5.48|2.75|2.73	0	.
chr11	66699999	66705599	DB_Ctrl_dev_H3K27me3_P39_vs_E14_up_4419|5.25|2.67|2.58	0	.
chr12	79452999	79456799	DB_Ctrl_dev_H3K27me3_P39_vs_E14_up_4423|5.17|2.13|3.04	0	.
chr14	46099799	46102399	DB_Ctrl_dev_H3K27me3_P39_vs_E14_up_4424|4.77|1.03|3.74	0	.
chr13	47938999	47943999	DB_Ctrl_dev_H3K27me3_P39_vs_E14_up_4426|5.73|3.7|2.03	0	.
chr18	53540199	53543799	DB_Ctrl_dev_H3K27me3_P39_vs_E14_up_4435|5.36|2.81|2.56	0	.
chr11	88757999	88764399	DB_Ctrl_dev_H3K27me3_P39_vs_E14_up_4436|5.84|4.07|1.77	0	.
chr7	119535199	119538799	DB_Ctrl_dev_H3K27me3_P39_vs_E14_up_4438|4.63|0.33|4.3	0	.
chr2	11112999	11120399	DB_Ctrl_dev_H3K27me3_P39_vs_E14_up_4443|6.05|4.41|1.64	0	.
chr4	23146199	23150999	DB_Ctrl_dev_H3K27me3_P39_vs_E14_up_4444|4.77|1.03|3.74	0	.
chr1	138063599	138068399	DB_Ctrl_dev_H3K27me3_P39_vs_E14_up_4445|5.57|3.44|2.13	0	.
chr9	14720999	14726599	DB_Ctrl_dev_H3K27me3_P39_vs_E14_up_4446|5.62|3.58|2.03	0	.
chr19	25356799	25368199	DB_Ctrl_dev_H3K27me3_P39_vs_E14_up_4448|7.04|5.97|1.07	0	.
chr8	89625399	89629199	DB_Ctrl_dev_H3K27me3_P39_vs_E14_up_4458|5.52|3.43|2.09	0	.
chr14	33757599	33767199	DB_Ctrl_dev_H3K27me3_P39_vs_E14_up_4459|6.27|4.79|1.48	0	.
chr17	3585399	3588999	DB_Ctrl_dev_H3K27me3_P39_vs_E14_up_4461|4.98|1.69|3.3	0	.
chr5	112000799	112003599	DB_Ctrl_dev_H3K27me3_P39_vs_E14_up_4462|4.92|1.5|3.42	0	.
chr16	88364799	88370199	DB_Ctrl_dev_H3K27me3_P39_vs_E14_up_4466|5.95|4.21|1.74	0	.
chr5	13631199	13633999	DB_Ctrl_dev_H3K27me3_P39_vs_E14_up_4468|4.6|0.33|4.27	0	.
chr11	34517999	34532799	DB_Ctrl_dev_H3K27me3_P39_vs_E14_up_4470|7.17|6.05|1.12	0	.
chr13	118448199	118452399	DB_Ctrl_dev_H3K27me3_P39_vs_E14_up_4474|4.97|1.72|3.24	0	.
chr5	108870399	108874799	DB_Ctrl_dev_H3K27me3_P39_vs_E14_up_4476|4.99|1.92|3.07	0	.
chr5	66173599	66175799	DB_Ctrl_dev_H3K27me3_P39_vs_E14_up_4480|4.57|-0.2|4.78	0	.
chr17	75860599	75867599	DB_Ctrl_dev_H3K27me3_P39_vs_E14_up_4481|5.54|3.42|2.12	0	.
chr17	72185799	72189199	DB_Ctrl_dev_H3K27me3_P39_vs_E14_up_4487|4.57|-0.2|4.77	0	.
chr6	146256999	146264399	DB_Ctrl_dev_H3K27me3_P39_vs_E14_up_4490|5.94|4.18|1.76	0	.
chr5	35932799	35937399	DB_Ctrl_dev_H3K27me3_P39_vs_E14_up_4492|5.79|3.49|2.3	0	.
chr2	178466799	178476999	DB_Ctrl_dev_H3K27me3_P39_vs_E14_up_4494|6.5|5.09|1.41	0	.
chr12	73366399	73377199	DB_Ctrl_dev_H3K27me3_P39_vs_E14_up_4495|6.68|5.44|1.23	0	.
chr4	65243199	65254599	DB_Ctrl_dev_H3K27me3_P39_vs_E14_up_4496|6.61|4.98|1.64	0	.
chr12	107278999	107282199	DB_Ctrl_dev_H3K27me3_P39_vs_E14_up_4497|4.69|0.72|3.97	0	.
chr13	8525799	8528399	DB_Ctrl_dev_H3K27me3_P39_vs_E14_up_4499|4.57|-0.2|4.77	0	.
chr3	49968199	49973999	DB_Ctrl_dev_H3K27me3_P39_vs_E14_up_4504|5.33|2.48|2.85	0	.
chr6	25180999	25185399	DB_Ctrl_dev_H3K27me3_P39_vs_E14_up_4506|4.62|-0.2|4.83	0	.
chr2	137752199	137761999	DB_Ctrl_dev_H3K27me3_P39_vs_E14_up_4507|6.27|4.73|1.54	0	.
chr8	26262599	26267799	DB_Ctrl_dev_H3K27me3_P39_vs_E14_up_4510|6.09|4.48|1.61	0	.
chr7	72923599	72927599	DB_Ctrl_dev_H3K27me3_P39_vs_E14_up_4517|5.33|2.95|2.38	0	.
chr3	129302199	129305199	DB_Ctrl_dev_H3K27me3_P39_vs_E14_up_4520|4.57|-0.2|4.77	0	.
chr3	148331399	148334999	DB_Ctrl_dev_H3K27me3_P39_vs_E14_up_4521|4.82|1.33|3.49	0	.
chr14	97864799	97871199	DB_Ctrl_dev_H3K27me3_P39_vs_E14_up_4523|5.88|3.83|2.06	0	.
chr19	55809599	55817999	DB_Ctrl_dev_H3K27me3_P39_vs_E14_up_4524|6.13|4.36|1.77	0	.
chr14	100708599	100715999	DB_Ctrl_dev_H3K27me3_P39_vs_E14_up_4529|5.7|3.8|1.89	0	.
chr18	13648599	13653199	DB_Ctrl_dev_H3K27me3_P39_vs_E14_up_4530|5.31|2.77|2.54	0	.
chr6	15181799	15185599	DB_Ctrl_dev_H3K27me3_P39_vs_E14_up_4535|5.72|3.79|1.93	0	.
chr6	137113399	137117399	DB_Ctrl_dev_H3K27me3_P39_vs_E14_up_4536|5.12|2|3.12	0	.
chr6	121761599	121766199	DB_Ctrl_dev_H3K27me3_P39_vs_E14_up_4537|4.94|1.72|3.22	0	.
chr17	72460799	72464399	DB_Ctrl_dev_H3K27me3_P39_vs_E14_up_4538|4.6|0.43|4.17	0	.
chr6	5385799	5395799	DB_Ctrl_dev_H3K27me3_P39_vs_E14_up_4540|6.93|5.79|1.14	0	.
chr2	105323199	105334399	DB_Ctrl_dev_H3K27me3_P39_vs_E14_up_4544|6.79|5.52|1.27	0	.
chr13	23201999	23204199	DB_Ctrl_dev_H3K27me3_P39_vs_E14_up_4545|4.57|-0.2|4.77	0	.
chr6	4443799	4460199	DB_Ctrl_dev_H3K27me3_P39_vs_E14_up_4555|6.74|5.5|1.24	0	.
chr10	115707999	115711599	DB_Ctrl_dev_H3K27me3_P39_vs_E14_up_4561|4.92|1.76|3.16	0	.
chr11	31395799	31399199	DB_Ctrl_dev_H3K27me3_P39_vs_E14_up_4562|4.96|1.7|3.26	0	.
chr9	41186599	41190999	DB_Ctrl_dev_H3K27me3_P39_vs_E14_up_4566|5.91|4.14|1.77	0	.
chr7	48872799	48877199	DB_Ctrl_dev_H3K27me3_P39_vs_E14_up_4567|5.93|4.25|1.68	0	.
chr8	26238999	26242999	DB_Ctrl_dev_H3K27me3_P39_vs_E14_up_4570|5.21|2.39|2.82	0	.
chr1	163353599	163359999	DB_Ctrl_dev_H3K27me3_P39_vs_E14_up_4572|5.96|4.25|1.72	0	.
chr1	104987199	104996799	DB_Ctrl_dev_H3K27me3_P39_vs_E14_up_4574|5.87|4.1|1.77	0	.
chr2	137246399	137250399	DB_Ctrl_dev_H3K27me3_P39_vs_E14_up_4575|5.41|3.08|2.33	0	.
chr1	62183999	62187399	DB_Ctrl_dev_H3K27me3_P39_vs_E14_up_4576|4.85|1.43|3.42	0	.
chr5	136417199	136422199	DB_Ctrl_dev_H3K27me3_P39_vs_E14_up_4578|5.41|2.67|2.75	0	.
chr18	70924799	70928599	DB_Ctrl_dev_H3K27me3_P39_vs_E14_up_4579|4.81|1.33|3.48	0	.
chr2	57609999	57619199	DB_Ctrl_dev_H3K27me3_P39_vs_E14_up_4581|6.09|4.51|1.59	0	.
chr2	11389999	11393799	DB_Ctrl_dev_H3K27me3_P39_vs_E14_up_4582|5.01|1.69|3.33	0	.
chr8	55558399	55562999	DB_Ctrl_dev_H3K27me3_P39_vs_E14_up_4583|4.79|1.33|3.46	0	.
chr2	22016199	22021799	DB_Ctrl_dev_H3K27me3_P39_vs_E14_up_4584|5.38|2.79|2.59	0	.
chr17	9107199	9110799	DB_Ctrl_dev_H3K27me3_P39_vs_E14_up_4585|4.96|1.95|3.01	0	.
chr6	146415799	146421199	DB_Ctrl_dev_H3K27me3_P39_vs_E14_up_4587|6.06|4.39|1.67	0	.
chr13	58575799	58584199	DB_Ctrl_dev_H3K27me3_P39_vs_E14_up_4588|6.59|4.91|1.68	0	.
chr14	101325199	101328999	DB_Ctrl_dev_H3K27me3_P39_vs_E14_up_4595|5.37|2.79|2.59	0	.
chr13	103794599	103800799	DB_Ctrl_dev_H3K27me3_P39_vs_E14_up_4597|5.51|3.32|2.19	0	.
chr18	74548599	74552999	DB_Ctrl_dev_H3K27me3_P39_vs_E14_up_4598|6.16|4.52|1.63	0	.
chr7	115505199	115514399	DB_Ctrl_dev_H3K27me3_P39_vs_E14_up_4599|6.4|4.74|1.67	0	.
chr5	38803799	38806799	DB_Ctrl_dev_H3K27me3_P39_vs_E14_up_4601|4.94|1.72|3.21	0	.
chr9	47293599	47296399	DB_Ctrl_dev_H3K27me3_P39_vs_E14_up_4602|4.91|1.76|3.15	0	.
chr10	124340999	124343999	DB_Ctrl_dev_H3K27me3_P39_vs_E14_up_4604|4.54|-0.2|4.75	0	.
chr3	147160999	147167599	DB_Ctrl_dev_H3K27me3_P39_vs_E14_up_4608|5.63|3.42|2.21	0	.
chr13	114640599	114646199	DB_Ctrl_dev_H3K27me3_P39_vs_E14_up_4609|5.67|3.33|2.35	0	.
chr3	130920599	130929799	DB_Ctrl_dev_H3K27me3_P39_vs_E14_up_4620|6.88|5.73|1.14	0	.
chr10	121861599	121867999	DB_Ctrl_dev_H3K27me3_P39_vs_E14_up_4621|5.39|3.12|2.27	0	.
chr2	146147599	146150799	DB_Ctrl_dev_H3K27me3_P39_vs_E14_up_4622|5.48|3.26|2.21	0	.
chr1	68885199	68889199	DB_Ctrl_dev_H3K27me3_P39_vs_E14_up_4625|4.54|-0.2|4.74	0	.
chr17	41518799	41523799	DB_Ctrl_dev_H3K27me3_P39_vs_E14_up_4626|5.63|3.67|1.95	0	.
chr2	114002999	114024799	DB_Ctrl_dev_H3K27me3_P39_vs_E14_up_4627|7.78|6.97|0.8	0	.
chr7	115281799	115290199	DB_Ctrl_dev_H3K27me3_P39_vs_E14_up_4628|6.45|5.04|1.41	0	.
chr1	126337799	126342399	DB_Ctrl_dev_H3K27me3_P39_vs_E14_up_4632|5.03|1.85|3.18	0	.
chr10	117611999	117615199	DB_Ctrl_dev_H3K27me3_P39_vs_E14_up_4634|4.57|0.33|4.24	0	.
chr10	121092599	121100399	DB_Ctrl_dev_H3K27me3_P39_vs_E14_up_4637|6.41|5.04|1.37	0	.
chr8	114617399	114623999	DB_Ctrl_dev_H3K27me3_P39_vs_E14_up_4638|6.01|4.3|1.71	0	.
chr2	76936599	76940199	DB_Ctrl_dev_H3K27me3_P39_vs_E14_up_4639|5.2|2.58|2.62	0	.
chr14	67256799	67282399	DB_Ctrl_dev_H3K27me3_P39_vs_E14_up_4640|7.97|7.24|0.73	0	.
chr1	187560399	187562599	DB_Ctrl_dev_H3K27me3_P39_vs_E14_up_4647|4.66|0.72|3.94	0	.
chr16	88268999	88272199	DB_Ctrl_dev_H3K27me3_P39_vs_E14_up_4648|5.01|2.09|2.92	0	.
chr18	58689799	58695199	DB_Ctrl_dev_H3K27me3_P39_vs_E14_up_4649|5.11|2|3.11	0	.
chr14	98112799	98118399	DB_Ctrl_dev_H3K27me3_P39_vs_E14_up_4654|5.59|3.28|2.3	0	.
chr5	46491999	46496999	DB_Ctrl_dev_H3K27me3_P39_vs_E14_up_4655|5.01|1.69|3.33	0	.
chr8	12492999	12509999	DB_Ctrl_dev_H3K27me3_P39_vs_E14_up_4656|7.68|6.83|0.85	0	.
chr9	98105199	98108199	DB_Ctrl_dev_H3K27me3_P39_vs_E14_up_4658|4.64|0.33|4.3	0	.
chr12	79606999	79610399	DB_Ctrl_dev_H3K27me3_P39_vs_E14_up_4659|4.54|-0.2|4.75	0	.
chr5	69343199	69347199	DB_Ctrl_dev_H3K27me3_P39_vs_E14_up_4660|4.87|1.28|3.59	0	.
chr1	188526199	188531399	DB_Ctrl_dev_H3K27me3_P39_vs_E14_up_4661|5.86|4.04|1.82	0	.
chr13	59948399	59951799	DB_Ctrl_dev_H3K27me3_P39_vs_E14_up_4663|4.98|1.88|3.1	0	.
chr8	89880999	89886599	DB_Ctrl_dev_H3K27me3_P39_vs_E14_up_4664|5.43|3.22|2.21	0	.
chr13	79251199	79253999	DB_Ctrl_dev_H3K27me3_P39_vs_E14_up_4665|4.57|0.43|4.14	0	.
chr1	130145199	130147999	DB_Ctrl_dev_H3K27me3_P39_vs_E14_up_4666|4.57|0.33|4.24	0	.
chr9	76364799	76368199	DB_Ctrl_dev_H3K27me3_P39_vs_E14_up_4667|4.57|0.33|4.24	0	.
chr13	48047999	48051799	DB_Ctrl_dev_H3K27me3_P39_vs_E14_up_4669|5.63|3.67|1.95	0	.
chr11	38607999	38615399	DB_Ctrl_dev_H3K27me3_P39_vs_E14_up_4671|5.77|3.77|2	0	.
chr3	132000399	132004799	DB_Ctrl_dev_H3K27me3_P39_vs_E14_up_4672|5.21|2.52|2.69	0	.
chr11	18367999	18373199	DB_Ctrl_dev_H3K27me3_P39_vs_E14_up_4675|5.31|2.97|2.34	0	.
chr5	50443799	50446999	DB_Ctrl_dev_H3K27me3_P39_vs_E14_up_4677|4.57|0.33|4.24	0	.
chr5	102747199	102751599	DB_Ctrl_dev_H3K27me3_P39_vs_E14_up_4680|5.27|2.86|2.41	0	.
chr3	145632399	145636599	DB_Ctrl_dev_H3K27me3_P39_vs_E14_up_4686|4.54|-0.2|4.75	0	.
chr6	9835599	9839599	DB_Ctrl_dev_H3K27me3_P39_vs_E14_up_4687|4.89|1.5|3.4	0	.
chr2	56121199	56126199	DB_Ctrl_dev_H3K27me3_P39_vs_E14_up_4690|5.36|2.57|2.79	0	.
chr13	56720199	56724999	DB_Ctrl_dev_H3K27me3_P39_vs_E14_up_4691|5.31|2.48|2.83	0	.
chr11	18611399	18618599	DB_Ctrl_dev_H3K27me3_P39_vs_E14_up_4699|6.01|4.34|1.67	0	.
chr1	88591399	88595599	DB_Ctrl_dev_H3K27me3_P39_vs_E14_up_4703|5.49|3.39|2.1	0	.
chr2	146179599	146186399	DB_Ctrl_dev_H3K27me3_P39_vs_E14_up_4704|5.7|3.78|1.92	0	.
chr9	15654399	15658399	DB_Ctrl_dev_H3K27me3_P39_vs_E14_up_4706|4.96|1.69|3.28	0	.
chr6	12601599	12609199	DB_Ctrl_dev_H3K27me3_P39_vs_E14_up_4708|6.36|4.86|1.5	0	.
chr1	191202199	191205799	DB_Ctrl_dev_H3K27me3_P39_vs_E14_up_4709|4.66|0.87|3.79	0	.
chr13	4137199	4145999	DB_Ctrl_dev_H3K27me3_P39_vs_E14_up_4712|5.63|3.69|1.93	0	.
chr1	118976799	118988999	DB_Ctrl_dev_H3K27me3_P39_vs_E14_up_4714|6.4|4.99|1.41	0	.
chr18	14027999	14033599	DB_Ctrl_dev_H3K27me3_P39_vs_E14_up_4715|5.44|2.75|2.69	0	.
chr4	47322799	47340199	DB_Ctrl_dev_H3K27me3_P39_vs_E14_up_4720|7|5.93|1.07	0	.
chr5	23200799	23209399	DB_Ctrl_dev_H3K27me3_P39_vs_E14_up_4727|6.02|4.25|1.77	0	.
chr9	55045799	55051599	DB_Ctrl_dev_H3K27me3_P39_vs_E14_up_4729|6.33|4.89|1.43	0	.
chr1	20452999	20455199	DB_Ctrl_dev_H3K27me3_P39_vs_E14_up_4731|4.51|-0.2|4.71	0	.
chr13	6826399	6829199	DB_Ctrl_dev_H3K27me3_P39_vs_E14_up_4732|4.51|-0.2|4.71	0	.
chr16	66119199	66122399	DB_Ctrl_dev_H3K27me3_P39_vs_E14_up_4733|4.51|-0.2|4.71	0	.
chr1	163561199	163564399	DB_Ctrl_dev_H3K27me3_P39_vs_E14_up_4734|4.63|0.72|3.91	0	.
chr6	94771399	94775799	DB_Ctrl_dev_H3K27me3_P39_vs_E14_up_4737|5.82|3.85|1.97	0	.
chr4	106100399	106105399	DB_Ctrl_dev_H3K27me3_P39_vs_E14_up_4741|6.07|4.52|1.56	0	.
chr4	5905999	5908399	DB_Ctrl_dev_H3K27me3_P39_vs_E14_up_4744|4.51|-0.2|4.71	0	.
chr7	67920599	67932199	DB_Ctrl_dev_H3K27me3_P39_vs_E14_up_4745|6.77|5.6|1.17	0	.
chr4	124272799	124278199	DB_Ctrl_dev_H3K27me3_P39_vs_E14_up_4748|6.35|4.91|1.44	0	.
chr3	128974599	128981199	DB_Ctrl_dev_H3K27me3_P39_vs_E14_up_4749|5.48|3.34|2.13	0	.
chr4	72991399	72995399	DB_Ctrl_dev_H3K27me3_P39_vs_E14_up_4751|5.52|3.46|2.07	0	.
chr6	140827999	140833999	DB_Ctrl_dev_H3K27me3_P39_vs_E14_up_4754|5.69|3.74|1.94	0	.
chr11	45196999	45202199	DB_Ctrl_dev_H3K27me3_P39_vs_E14_up_4757|5.09|2|3.09	0	.
chr2	3712999	3714799	DB_Ctrl_dev_H3K27me3_P39_vs_E14_up_4760|4.51|-0.2|4.72	0	.
chr2	137581799	137584199	DB_Ctrl_dev_H3K27me3_P39_vs_E14_up_4761|4.51|-0.2|4.72	0	.
chr19	34334999	34338999	DB_Ctrl_dev_H3K27me3_P39_vs_E14_up_4762|4.71|1.03|3.68	0	.
chr5	51382599	51390399	DB_Ctrl_dev_H3K27me3_P39_vs_E14_up_4764|6.11|4.56|1.55	0	.
chr8	115942199	115946599	DB_Ctrl_dev_H3K27me3_P39_vs_E14_up_4767|5.98|4.16|1.81	0	.
chr6	100018799	100024599	DB_Ctrl_dev_H3K27me3_P39_vs_E14_up_4769|5.54|3|2.54	0	.
chr1	15994199	16000599	DB_Ctrl_dev_H3K27me3_P39_vs_E14_up_4779|5.32|3.02|2.3	0	.
chr17	67104799	67116199	DB_Ctrl_dev_H3K27me3_P39_vs_E14_up_4782|6.19|4.6|1.59	0	.
chr3	15214999	15217399	DB_Ctrl_dev_H3K27me3_P39_vs_E14_up_4783|4.61|0.33|4.27	0	.
chr4	97432399	97436399	DB_Ctrl_dev_H3K27me3_P39_vs_E14_up_4784|4.61|0.33|4.27	0	.
chr3	114646399	114649399	DB_Ctrl_dev_H3K27me3_P39_vs_E14_up_4787|4.51|-0.2|4.71	0	.
chr9	60983399	60991799	DB_Ctrl_dev_H3K27me3_P39_vs_E14_up_4788|6.08|4.54|1.54	0	.
chr13	47879599	47886999	DB_Ctrl_dev_H3K27me3_P39_vs_E14_up_4790|6.03|3.97|2.06	0	.
chr10	39624199	39630999	DB_Ctrl_dev_H3K27me3_P39_vs_E14_up_4791|6.26|4.69|1.57	0	.
chr9	89372799	89382199	DB_Ctrl_dev_H3K27me3_P39_vs_E14_up_4792|5.71|3.67|2.04	0	.
chr2	51033399	51040999	DB_Ctrl_dev_H3K27me3_P39_vs_E14_up_4793|6.3|4.75|1.55	0	.
chr11	88569999	88574599	DB_Ctrl_dev_H3K27me3_P39_vs_E14_up_4801|4.92|1.72|3.2	0	.
chr8	81380199	81388199	DB_Ctrl_dev_H3K27me3_P39_vs_E14_up_4802|6.4|5.03|1.37	0	.
chr16	89577199	89581599	DB_Ctrl_dev_H3K27me3_P39_vs_E14_up_4804|5.74|3.79|1.96	0	.
chr12	67757799	67760399	DB_Ctrl_dev_H3K27me3_P39_vs_E14_up_4805|4.51|-0.2|4.72	0	.
chr9	86296599	86300599	DB_Ctrl_dev_H3K27me3_P39_vs_E14_up_4806|5.48|3.28|2.21	0	.
chr18	64297199	64301399	DB_Ctrl_dev_H3K27me3_P39_vs_E14_up_4807|5.09|2.07|3.02	0	.
chr2	106257399	106260999	DB_Ctrl_dev_H3K27me3_P39_vs_E14_up_4810|4.9|1.5|3.4	0	.
chr7	115711399	115719999	DB_Ctrl_dev_H3K27me3_P39_vs_E14_up_4812|5.9|4.24|1.66	0	.
chr5	102310999	102313999	DB_Ctrl_dev_H3K27me3_P39_vs_E14_up_4813|5.05|2.22|2.84	0	.
chr1	61815599	61818599	DB_Ctrl_dev_H3K27me3_P39_vs_E14_up_4814|4.55|-0.2|4.75	0	.
chr6	24790799	24794999	DB_Ctrl_dev_H3K27me3_P39_vs_E14_up_4818|4.54|0.33|4.21	0	.
chr12	92990199	92993799	DB_Ctrl_dev_H3K27me3_P39_vs_E14_up_4824|5.01|2.06|2.95	0	.
chr18	62793199	62798599	DB_Ctrl_dev_H3K27me3_P39_vs_E14_up_4828|4.89|1.5|3.39	0	.
chr5	110928399	110930399	DB_Ctrl_dev_H3K27me3_P39_vs_E14_up_4829|4.63|0.72|3.91	0	.
chr14	109763399	109767199	DB_Ctrl_dev_H3K27me3_P39_vs_E14_up_4830|4.79|1.28|3.51	0	.
chr6	99966599	99971399	DB_Ctrl_dev_H3K27me3_P39_vs_E14_up_4831|5.13|2.07|3.06	0	.
chr2	39559399	39563999	DB_Ctrl_dev_H3K27me3_P39_vs_E14_up_4834|5.19|2.65|2.54	0	.
chr2	10407399	10415799	DB_Ctrl_dev_H3K27me3_P39_vs_E14_up_4835|6.09|4.56|1.54	0	.
chr2	133529799	133538199	DB_Ctrl_dev_H3K27me3_P39_vs_E14_up_4837|5.83|4.1|1.73	0	.
chr2	137514199	137518399	DB_Ctrl_dev_H3K27me3_P39_vs_E14_up_4840|4.53|-0.2|4.74	0	.
chr3	150606399	150610599	DB_Ctrl_dev_H3K27me3_P39_vs_E14_up_4841|4.63|0.72|3.9	0	.
chr15	86662399	86674999	DB_Ctrl_dev_H3K27me3_P39_vs_E14_up_4842|6.95|5.81|1.15	0	.
chr3	83232199	83237599	DB_Ctrl_dev_H3K27me3_P39_vs_E14_up_4843|4.87|1.5|3.37	0	.
chr1	138825399	138850599	DB_Ctrl_dev_H3K27me3_P39_vs_E14_up_4844|8.88|8.3|0.58	0	.
chr1	68842799	68850599	DB_Ctrl_dev_H3K27me3_P39_vs_E14_up_4845|6.04|4.44|1.6	0	.
chr12	107039799	107043799	DB_Ctrl_dev_H3K27me3_P39_vs_E14_up_4846|5.29|2.48|2.81	0	.
chr4	111824599	111831799	DB_Ctrl_dev_H3K27me3_P39_vs_E14_up_4850|5.55|3.36|2.19	0	.
chr19	20303199	20307799	DB_Ctrl_dev_H3K27me3_P39_vs_E14_up_4853|4.6|0.8|3.8	0	.
chr8	107669599	107675599	DB_Ctrl_dev_H3K27me3_P39_vs_E14_up_4858|5.51|3.39|2.12	0	.
chr5	50461199	50464599	DB_Ctrl_dev_H3K27me3_P39_vs_E14_up_4859|5.44|3.23|2.21	0	.
chr18	57229199	57231599	DB_Ctrl_dev_H3K27me3_P39_vs_E14_up_4865|4.9|1.5|3.4	0	.
chr9	116990199	116997199	DB_Ctrl_dev_H3K27me3_P39_vs_E14_up_4866|6.08|4.53|1.55	0	.
chr6	130841799	130843999	DB_Ctrl_dev_H3K27me3_P39_vs_E14_up_4867|4.48|-0.2|4.68	0	.
chr8	44773399	44777999	DB_Ctrl_dev_H3K27me3_P39_vs_E14_up_4868|4.94|1.98|2.96	0	.
chr13	115060399	115063599	DB_Ctrl_dev_H3K27me3_P39_vs_E14_up_4870|4.63|0.72|3.91	0	.
chr4	66381599	66387799	DB_Ctrl_dev_H3K27me3_P39_vs_E14_up_4871|5.77|4|1.76	0	.
chr19	16811999	16821399	DB_Ctrl_dev_H3K27me3_P39_vs_E14_up_4874|6.45|5.04|1.41	0	.
chr9	73557599	73567799	DB_Ctrl_dev_H3K27me3_P39_vs_E14_up_4875|6.23|4.49|1.74	0	.
chr17	52559599	52565199	DB_Ctrl_dev_H3K27me3_P39_vs_E14_up_4876|5.74|3.93|1.81	0	.
chr17	53722999	53729999	DB_Ctrl_dev_H3K27me3_P39_vs_E14_up_4878|5.88|4.09|1.79	0	.
chr12	47366599	47370799	DB_Ctrl_dev_H3K27me3_P39_vs_E14_up_4879|5.41|3.03|2.38	0	.
chr16	42223999	42229799	DB_Ctrl_dev_H3K27me3_P39_vs_E14_up_4881|5.25|2.87|2.38	0	.
chr6	64769999	64774199	DB_Ctrl_dev_H3K27me3_P39_vs_E14_up_4885|5.17|2.23|2.94	0	.
chr3	34617999	34620599	DB_Ctrl_dev_H3K27me3_P39_vs_E14_up_4888|4.63|0.87|3.76	0	.
chr1	78015999	78027199	DB_Ctrl_dev_H3K27me3_P39_vs_E14_up_4889|6.64|5.31|1.33	0	.
chr9	89309199	89312199	DB_Ctrl_dev_H3K27me3_P39_vs_E14_up_4891|4.65|0.87|3.79	0	.
chr10	102920999	102923599	DB_Ctrl_dev_H3K27me3_P39_vs_E14_up_4892|4.48|-0.2|4.68	0	.
chr11	18245399	18248799	DB_Ctrl_dev_H3K27me3_P39_vs_E14_up_4893|4.48|-0.2|4.68	0	.
chr18	33917399	33920399	DB_Ctrl_dev_H3K27me3_P39_vs_E14_up_4894|4.75|1.03|3.72	0	.
chr7	124986599	124990199	DB_Ctrl_dev_H3K27me3_P39_vs_E14_up_4896|4.53|-0.2|4.74	0	.
chr2	11067599	11073599	DB_Ctrl_dev_H3K27me3_P39_vs_E14_up_4897|5.13|2.44|2.69	0	.
chr15	60631199	60634399	DB_Ctrl_dev_H3K27me3_P39_vs_E14_up_4899|4.5|-0.2|4.71	0	.
chr1	5538799	5541199	DB_Ctrl_dev_H3K27me3_P39_vs_E14_up_4900|4.54|0.43|4.12	0	.
chr3	34904799	34907599	DB_Ctrl_dev_H3K27me3_P39_vs_E14_up_4904|4.6|0.72|3.88	0	.
chr9	88048199	88049999	DB_Ctrl_dev_H3K27me3_P39_vs_E14_up_4905|4.6|0.72|3.88	0	.
chr3	3761599	3763599	DB_Ctrl_dev_H3K27me3_P39_vs_E14_up_4909|4.54|0.43|4.11	0	.
chr1	6451799	6455599	DB_Ctrl_dev_H3K27me3_P39_vs_E14_up_4910|4.6|0.72|3.88	0	.
chr1	167809599	167815199	DB_Ctrl_dev_H3K27me3_P39_vs_E14_up_4914|5.41|3.21|2.21	0	.
chr15	32737599	32741599	DB_Ctrl_dev_H3K27me3_P39_vs_E14_up_4915|5.26|2.81|2.44	0	.
chr6	130820199	130823399	DB_Ctrl_dev_H3K27me3_P39_vs_E14_up_4916|4.47|-0.2|4.68	0	.
chr17	72271399	72279199	DB_Ctrl_dev_H3K27me3_P39_vs_E14_up_4919|6.08|4.51|1.57	0	.
chr16	30820799	30824999	DB_Ctrl_dev_H3K27me3_P39_vs_E14_up_4926|5.85|3.92|1.93	0	.
chr19	25615199	25626199	DB_Ctrl_dev_H3K27me3_P39_vs_E14_up_4927|6.73|5.39|1.34	0	.
chr6	137270599	137274999	DB_Ctrl_dev_H3K27me3_P39_vs_E14_up_4935|4.56|-0.2|4.77	0	.
chr2	54587599	54589999	DB_Ctrl_dev_H3K27me3_P39_vs_E14_up_4936|4.51|0.33|4.18	0	.
chr18	13587599	13595199	DB_Ctrl_dev_H3K27me3_P39_vs_E14_up_4939|6.01|4.4|1.61	0	.
chr5	127394399	127398399	DB_Ctrl_dev_H3K27me3_P39_vs_E14_up_4942|4.9|1.5|3.4	0	.
chr7	129306799	129315399	DB_Ctrl_dev_H3K27me3_P39_vs_E14_up_4944|5.98|4.35|1.62	0	.
chr8	118032999	118036999	DB_Ctrl_dev_H3K27me3_P39_vs_E14_up_4948|5.79|4.03|1.77	0	.
chr11	34067999	34087399	DB_Ctrl_dev_H3K27me3_P39_vs_E14_up_4949|7.57|6.74|0.83	0	.
chr5	106026599	106036599	DB_Ctrl_dev_H3K27me3_P39_vs_E14_up_4953|6.82|5.64|1.18	0	.
chr10	13427599	13430199	DB_Ctrl_dev_H3K27me3_P39_vs_E14_up_4954|5.23|2.74|2.49	0	.
chr15	26585799	26588799	DB_Ctrl_dev_H3K27me3_P39_vs_E14_up_4957|4.47|-0.2|4.68	0	.
chr17	72267799	72270599	DB_Ctrl_dev_H3K27me3_P39_vs_E14_up_4961|4.51|0.33|4.18	0	.
chr1	61718399	61721199	DB_Ctrl_dev_H3K27me3_P39_vs_E14_up_4962|4.5|-0.2|4.71	0	.
chr1	41602799	41606199	DB_Ctrl_dev_H3K27me3_P39_vs_E14_up_4963|4.94|1.69|3.26	0	.
chr13	42226399	42229199	DB_Ctrl_dev_H3K27me3_P39_vs_E14_up_4970|4.51|0.33|4.18	0	.
chr9	116971599	116981199	DB_Ctrl_dev_H3K27me3_P39_vs_E14_up_4973|6.96|5.88|1.08	0	.
chr1	128867199	128869199	DB_Ctrl_dev_H3K27me3_P39_vs_E14_up_4977|4.48|-0.2|4.69	0	.
chr6	53662599	53664999	DB_Ctrl_dev_H3K27me3_P39_vs_E14_up_4978|4.48|-0.2|4.69	0	.
chr1	128710599	128717799	DB_Ctrl_dev_H3K27me3_P39_vs_E14_up_4979|5.56|3.39|2.17	0	.
chr9	3006599	3006999	DB_Ctrl_dev_H3K27me3_P39_vs_E14_up_4981|5.66|3.7|1.96	0	.
chr6	15735199	15741599	DB_Ctrl_dev_H3K27me3_P39_vs_E14_up_4983|5.58|3.54|2.04	0	.
chr11	33880999	33883799	DB_Ctrl_dev_H3K27me3_P39_vs_E14_up_4984|5.11|2.13|2.98	0	.
chr3	130757199	130761799	DB_Ctrl_dev_H3K27me3_P39_vs_E14_up_4988|6.37|4.99|1.38	0	.
chr4	63302999	63318799	DB_Ctrl_dev_H3K27me3_P39_vs_E14_up_4989|7.41|6.46|0.96	0	.
chr7	71350199	71352999	DB_Ctrl_dev_H3K27me3_P39_vs_E14_up_4992|4.82|1.47|3.35	0	.
chr2	56333199	56335599	DB_Ctrl_dev_H3K27me3_P39_vs_E14_up_4994|4.63|0.87|3.77	0	.
chr12	106442599	106447999	DB_Ctrl_dev_H3K27me3_P39_vs_E14_up_4995|5.87|4.05|1.81	0	.
chr6	53381799	53386799	DB_Ctrl_dev_H3K27me3_P39_vs_E14_up_4996|5.49|3.34|2.14	0	.
chr12	93003799	93006599	DB_Ctrl_dev_H3K27me3_P39_vs_E14_up_4998|4.51|0.33|4.18	0	.
chr13	114490999	114494599	DB_Ctrl_dev_H3K27me3_P39_vs_E14_up_5000|4.94|1.95|2.99	0	.
chr16	25300999	25310599	DB_Ctrl_dev_H3K27me3_P39_vs_E14_up_5001|6.67|5.42|1.25	0	.
chr1	140839599	140841799	DB_Ctrl_dev_H3K27me3_P39_vs_E14_up_5004|4.54|0.33|4.2	0	.
chr2	146164199	146166599	DB_Ctrl_dev_H3K27me3_P39_vs_E14_up_5007|4.86|1.54|3.32	0	.
chr1	150637199	150641199	DB_Ctrl_dev_H3K27me3_P39_vs_E14_up_5008|5.03|1.85|3.17	0	.
chr6	146200199	146211599	DB_Ctrl_dev_H3K27me3_P39_vs_E14_up_5013|6.22|4.76|1.46	0	.
chr12	8771799	8773399	DB_Ctrl_dev_H3K27me3_P39_vs_E14_up_5015|4.68|1.03|3.65	0	.
chr2	51853199	51855599	DB_Ctrl_dev_H3K27me3_P39_vs_E14_up_5019|4.44|-0.2|4.65	0	.
chr6	140711599	140722199	DB_Ctrl_dev_H3K27me3_P39_vs_E14_up_5021|6.54|5.22|1.32	0	.
chr9	49461599	49468199	DB_Ctrl_dev_H3K27me3_P39_vs_E14_up_5027|5.82|4.12|1.7	0	.
chr8	89730799	89745399	DB_Ctrl_dev_H3K27me3_P39_vs_E14_up_5028|7.04|6.02|1.02	0	.
chr9	68562399	68571399	DB_Ctrl_dev_H3K27me3_P39_vs_E14_up_5029|5.91|4.25|1.66	0	.
chr16	25401399	25407199	DB_Ctrl_dev_H3K27me3_P39_vs_E14_up_5031|5.43|3.33|2.1	0	.
chr4	20344399	20348799	DB_Ctrl_dev_H3K27me3_P39_vs_E14_up_5032|5.37|2.57|2.8	0	.
chr1	72133399	72135999	DB_Ctrl_dev_H3K27me3_P39_vs_E14_up_5034|4.94|1.88|3.05	0	.
chr5	26965199	26969999	DB_Ctrl_dev_H3K27me3_P39_vs_E14_up_5035|5.78|4.04|1.74	0	.
chr16	89013799	89017399	DB_Ctrl_dev_H3K27me3_P39_vs_E14_up_5036|4.45|-0.2|4.65	0	.
chr6	130782199	130784799	DB_Ctrl_dev_H3K27me3_P39_vs_E14_up_5037|4.45|-0.2|4.65	0	.
chr7	114736399	114740799	DB_Ctrl_dev_H3K27me3_P39_vs_E14_up_5038|4.77|1.28|3.49	0	.
chr3	34900399	34903199	DB_Ctrl_dev_H3K27me3_P39_vs_E14_up_5041|4.92|1.92|3	0	.
chr13	7369399	7374799	DB_Ctrl_dev_H3K27me3_P39_vs_E14_up_5042|4.76|1.28|3.48	0	.
chr6	137594199	137598799	DB_Ctrl_dev_H3K27me3_P39_vs_E14_up_5044|5.43|3.31|2.11	0	.
chr14	100433599	100437199	DB_Ctrl_dev_H3K27me3_P39_vs_E14_up_5045|4.92|1.72|3.2	0	.
chr2	113104999	113107599	DB_Ctrl_dev_H3K27me3_P39_vs_E14_up_5046|4.79|1.58|3.21	0	.
chr2	66800599	66807399	DB_Ctrl_dev_H3K27me3_P39_vs_E14_up_5047|5.73|3.93|1.79	0	.
chr14	31129999	31132599	DB_Ctrl_dev_H3K27me3_P39_vs_E14_up_5048|5.56|3.5|2.06	0	.
chr4	135669399	135678599	DB_Ctrl_dev_H3K27me3_P39_vs_E14_up_5050|6.65|5.39|1.26	0	.
chr5	26989599	26997199	DB_Ctrl_dev_H3K27me3_P39_vs_E14_up_5052|6.39|5.06|1.34	0	.
chr1	186926399	186932399	DB_Ctrl_dev_H3K27me3_P39_vs_E14_up_5053|6.31|4.82|1.49	0	.
chr14	53832999	53836599	DB_Ctrl_dev_H3K27me3_P39_vs_E14_up_5054|5.21|2.37|2.84	0	.
chr2	57825399	57829999	DB_Ctrl_dev_H3K27me3_P39_vs_E14_up_5061|5.05|2|3.05	0	.
chr1	105244799	105248799	DB_Ctrl_dev_H3K27me3_P39_vs_E14_up_5062|4.6|0.87|3.73	0	.
chr5	30736199	30738999	DB_Ctrl_dev_H3K27me3_P39_vs_E14_up_5064|4.45|-0.2|4.65	0	.
chr6	100764799	100768199	DB_Ctrl_dev_H3K27me3_P39_vs_E14_up_5065|4.45|-0.2|4.65	0	.
chr7	133434799	133437799	DB_Ctrl_dev_H3K27me3_P39_vs_E14_up_5066|4.6|0.87|3.74	0	.
chr6	141184799	141197199	DB_Ctrl_dev_H3K27me3_P39_vs_E14_up_5067|6.58|5.25|1.32	0	.
chr5	51371199	51374199	DB_Ctrl_dev_H3K27me3_P39_vs_E14_up_5068|4.91|1.69|3.23	0	.
chr8	108927399	108938799	DB_Ctrl_dev_H3K27me3_P39_vs_E14_up_5069|6.77|5.61|1.16	0	.
chr15	55953199	55956999	DB_Ctrl_dev_H3K27me3_P39_vs_E14_up_5071|4.51|0.33|4.18	0	.
chr9	89457199	89460599	DB_Ctrl_dev_H3K27me3_P39_vs_E14_up_5073|4.71|1.2|3.51	0	.
chr13	39459999	39465399	DB_Ctrl_dev_H3K27me3_P39_vs_E14_up_5074|4.98|1.85|3.13	0	.
chr1	88645599	88652799	DB_Ctrl_dev_H3K27me3_P39_vs_E14_up_5081|5.48|3.39|2.09	0	.
chr16	58959599	58963599	DB_Ctrl_dev_H3K27me3_P39_vs_E14_up_5082|4.84|1.5|3.34	0	.
chr15	11064599	11073199	DB_Ctrl_dev_H3K27me3_P39_vs_E14_up_5083|6.46|5.12|1.34	0	.
chr2	170266399	170275599	DB_Ctrl_dev_H3K27me3_P39_vs_E14_up_5084|5.98|4.2|1.78	0	.
chr13	19860799	19864199	DB_Ctrl_dev_H3K27me3_P39_vs_E14_up_5086|4.69|1.03|3.66	0	.
chr2	70363599	70371199	DB_Ctrl_dev_H3K27me3_P39_vs_E14_up_5089|6.21|4.78|1.43	0	.
chr8	89860399	89866999	DB_Ctrl_dev_H3K27me3_P39_vs_E14_up_5095|5.92|4.3|1.62	0	.
chr3	151371999	151375999	DB_Ctrl_dev_H3K27me3_P39_vs_E14_up_5096|4.45|-0.2|4.65	0	.
chr9	61358599	61369599	DB_Ctrl_dev_H3K27me3_P39_vs_E14_up_5098|6.85|5.7|1.15	0	.
chr14	28675599	28679199	DB_Ctrl_dev_H3K27me3_P39_vs_E14_up_5100|4.63|0.87|3.76	0	.
chr2	105075399	105084599	DB_Ctrl_dev_H3K27me3_P39_vs_E14_up_5101|6.5|5.09|1.41	0	.
chr6	22566399	22571199	DB_Ctrl_dev_H3K27me3_P39_vs_E14_up_5103|5.16|2.26|2.9	0	.
chr5	51311799	51315799	DB_Ctrl_dev_H3K27me3_P39_vs_E14_up_5108|5.38|3.13|2.25	0	.
chr2	137216199	137218799	DB_Ctrl_dev_H3K27me3_P39_vs_E14_up_5111|4.55|0.43|4.12	0	.
chr6	3302199	3309999	DB_Ctrl_dev_H3K27me3_P39_vs_E14_up_5113|6.16|4.67|1.48	0	.
chr19	14828399	14830799	DB_Ctrl_dev_H3K27me3_P39_vs_E14_up_5114|4.65|0.72|3.93	0	.
chr9	33317199	33323599	DB_Ctrl_dev_H3K27me3_P39_vs_E14_up_5116|5.36|2.67|2.7	0	.
chr18	55472599	55476799	DB_Ctrl_dev_H3K27me3_P39_vs_E14_up_5117|5.31|2.79|2.52	0	.
chr8	79980799	79983999	DB_Ctrl_dev_H3K27me3_P39_vs_E14_up_5120|4.48|0.33|4.15	0	.
chr6	86247599	86250999	DB_Ctrl_dev_H3K27me3_P39_vs_E14_up_5122|5.22|2.26|2.96	0	.
chr11	102577199	102582799	DB_Ctrl_dev_H3K27me3_P39_vs_E14_up_5123|6|4.36|1.64	0	.
chr2	26481799	26488799	DB_Ctrl_dev_H3K27me3_P39_vs_E14_up_5124|5.89|4.21|1.68	0	.
chr16	50805199	50807999	DB_Ctrl_dev_H3K27me3_P39_vs_E14_up_5125|4.57|0.72|3.85	0	.
chr14	98181999	98187399	DB_Ctrl_dev_H3K27me3_P39_vs_E14_up_5126|5.54|3.28|2.26	0	.
chr1	129216799	129223399	DB_Ctrl_dev_H3K27me3_P39_vs_E14_up_5127|5.96|4.35|1.61	0	.
chr2	171723599	171728399	DB_Ctrl_dev_H3K27me3_P39_vs_E14_up_5129|5.46|3.18|2.29	0	.
chr5	46789399	46791999	DB_Ctrl_dev_H3K27me3_P39_vs_E14_up_5131|4.57|0.8|3.78	0	.
chr5	97241999	97244599	DB_Ctrl_dev_H3K27me3_P39_vs_E14_up_5132|5.52|3.5|2.02	0	.
chr4	62822199	62829599	DB_Ctrl_dev_H3K27me3_P39_vs_E14_up_5133|6.04|4.52|1.52	0	.
chr18	56620199	56625199	DB_Ctrl_dev_H3K27me3_P39_vs_E14_up_5134|5.66|3.81|1.85	0	.
chr16	85889399	85894399	DB_Ctrl_dev_H3K27me3_P39_vs_E14_up_5135|5.78|4.06|1.73	0	.
chr14	48877799	48896999	DB_Ctrl_dev_H3K27me3_P39_vs_E14_up_5137|7.94|7.16|0.78	0	.
chr14	34099599	34106599	DB_Ctrl_dev_H3K27me3_P39_vs_E14_up_5138|6.18|4.59|1.58	0	.
chr19	14300599	14313799	DB_Ctrl_dev_H3K27me3_P39_vs_E14_up_5139|6.89|5.75|1.14	0	.
chr13	47379399	47410799	DB_Ctrl_dev_H3K27me3_P39_vs_E14_up_5140|8.31|7.66|0.65	0	.
chr13	58589799	58593599	DB_Ctrl_dev_H3K27me3_P39_vs_E14_up_5141|5.77|4.01|1.76	0	.
chr17	88402199	88408599	DB_Ctrl_dev_H3K27me3_P39_vs_E14_up_5143|6.18|4.7|1.48	0	.
chr10	88089799	88093599	DB_Ctrl_dev_H3K27me3_P39_vs_E14_up_5146|4.44|-0.2|4.65	0	.
chr3	73706799	73710999	DB_Ctrl_dev_H3K27me3_P39_vs_E14_up_5149|5.4|3.22|2.17	0	.
chr18	69880399	69884999	DB_Ctrl_dev_H3K27me3_P39_vs_E14_up_5150|4.79|1.54|3.25	0	.
chr13	85992199	85994799	DB_Ctrl_dev_H3K27me3_P39_vs_E14_up_5153|4.48|0.43|4.05	0	.
chr18	13904599	13906999	DB_Ctrl_dev_H3K27me3_P39_vs_E14_up_5154|4.41|-0.2|4.62	0	.
chr6	61078399	61082199	DB_Ctrl_dev_H3K27me3_P39_vs_E14_up_5155|4.41|-0.2|4.62	0	.
chr7	51580799	51583999	DB_Ctrl_dev_H3K27me3_P39_vs_E14_up_5157|4.41|-0.2|4.62	0	.
chr4	105774399	105780399	DB_Ctrl_dev_H3K27me3_P39_vs_E14_up_5161|5.49|3.47|2.02	0	.
chr6	51764799	51769999	DB_Ctrl_dev_H3K27me3_P39_vs_E14_up_5163|5.41|3.28|2.14	0	.
chr16	24840799	24845999	DB_Ctrl_dev_H3K27me3_P39_vs_E14_up_5166|5.29|3.04|2.25	0	.
chr16	43511399	43516799	DB_Ctrl_dev_H3K27me3_P39_vs_E14_up_5177|5.31|2.57|2.73	0	.
chr16	84038599	84041999	DB_Ctrl_dev_H3K27me3_P39_vs_E14_up_5178|4.41|-0.2|4.61	0	.
chr8	25274599	25280599	DB_Ctrl_dev_H3K27me3_P39_vs_E14_up_5180|6.11|4.63|1.48	0	.
chr4	65197199	65201399	DB_Ctrl_dev_H3K27me3_P39_vs_E14_up_5182|4.74|1.2|3.53	0	.
chr17	53683199	53688799	DB_Ctrl_dev_H3K27me3_P39_vs_E14_up_5184|5.76|3.92|1.84	0	.
chr1	190483599	190489199	DB_Ctrl_dev_H3K27me3_P39_vs_E14_up_5188|5.78|4.06|1.73	0	.
chr6	130845999	130850399	DB_Ctrl_dev_H3K27me3_P39_vs_E14_up_5189|5.1|2.46|2.63	0	.
chr13	47706799	47712999	DB_Ctrl_dev_H3K27me3_P39_vs_E14_up_5190|5.78|3.81|1.98	0	.
chr12	53708199	53710999	DB_Ctrl_dev_H3K27me3_P39_vs_E14_up_5192|4.41|-0.2|4.62	0	.
chr2	170090599	170096599	DB_Ctrl_dev_H3K27me3_P39_vs_E14_up_5195|5.74|3.91|1.83	0	.
chr6	141568999	141571999	DB_Ctrl_dev_H3K27me3_P39_vs_E14_up_5196|4.41|-0.2|4.61	0	.
chr9	25630399	25634399	DB_Ctrl_dev_H3K27me3_P39_vs_E14_up_5197|4.87|1.83|3.04	0	.
chr14	48906399	48918199	DB_Ctrl_dev_H3K27me3_P39_vs_E14_up_5199|6.9|5.8|1.1	0	.
chr11	92019599	92023399	DB_Ctrl_dev_H3K27me3_P39_vs_E14_up_5200|4.69|1.2|3.48	0	.
chr2	178824599	178829999	DB_Ctrl_dev_H3K27me3_P39_vs_E14_up_5202|5.39|2.75|2.64	0	.
chr1	68915799	68923799	DB_Ctrl_dev_H3K27me3_P39_vs_E14_up_5203|6.49|5.19|1.31	0	.
chr10	16761399	16764199	DB_Ctrl_dev_H3K27me3_P39_vs_E14_up_5204|4.82|1.5|3.32	0	.
chr6	141380199	141383799	DB_Ctrl_dev_H3K27me3_P39_vs_E14_up_5208|5.66|3.84|1.82	0	.
chr13	58495199	58498799	DB_Ctrl_dev_H3K27me3_P39_vs_E14_up_5209|5.08|2|3.08	0	.
chr1	126731399	126734599	DB_Ctrl_dev_H3K27me3_P39_vs_E14_up_5210|5.09|2.13|2.96	0	.
chr5	45937799	45940999	DB_Ctrl_dev_H3K27me3_P39_vs_E14_up_5214|4.89|1.69|3.21	0	.
chr15	8731999	8734999	DB_Ctrl_dev_H3K27me3_P39_vs_E14_up_5215|4.77|1.33|3.44	0	.
chr18	81749199	81754799	DB_Ctrl_dev_H3K27me3_P39_vs_E14_up_5217|5.47|3.43|2.04	0	.
chr2	50690999	50695599	DB_Ctrl_dev_H3K27me3_P39_vs_E14_up_5219|5.65|3.64|2.01	0	.
chr15	99856199	99863999	DB_Ctrl_dev_H3K27me3_P39_vs_E14_up_5220|6.22|4.75|1.47	0	.
chr14	33672799	33680599	DB_Ctrl_dev_H3K27me3_P39_vs_E14_up_5222|6.09|4.48|1.6	0	.
chr8	89295999	89300399	DB_Ctrl_dev_H3K27me3_P39_vs_E14_up_5223|5.74|3.96|1.79	0	.
chr3	145732799	145738999	DB_Ctrl_dev_H3K27me3_P39_vs_E14_up_5224|5.81|4.1|1.71	0	.
chr2	171911199	171914399	DB_Ctrl_dev_H3K27me3_P39_vs_E14_up_5225|5.16|2.65|2.5	0	.
chr3	66019199	66022599	DB_Ctrl_dev_H3K27me3_P39_vs_E14_up_5226|4.57|0.72|3.85	0	.
chr3	125400399	125406199	DB_Ctrl_dev_H3K27me3_P39_vs_E14_up_5229|5.19|2.37|2.82	0	.
chr8	81982599	81985999	DB_Ctrl_dev_H3K27me3_P39_vs_E14_up_5230|4.41|-0.2|4.61	0	.
chr14	118361399	118382999	DB_Ctrl_dev_H3K27me3_P39_vs_E14_up_5232|7.36|6.38|0.98	0	.
chr1	190976599	190982799	DB_Ctrl_dev_H3K27me3_P39_vs_E14_up_5234|6.23|4.82|1.42	0	.
chr7	129113999	129123599	DB_Ctrl_dev_H3K27me3_P39_vs_E14_up_5235|6.1|4.63|1.48	0	.
chr9	91129999	91134799	DB_Ctrl_dev_H3K27me3_P39_vs_E14_up_5236|5.12|2.45|2.67	0	.
chr13	47868999	47877199	DB_Ctrl_dev_H3K27me3_P39_vs_E14_up_5237|6.21|4.79|1.42	0	.
chr2	19278999	19283799	DB_Ctrl_dev_H3K27me3_P39_vs_E14_up_5238|4.89|1.69|3.21	0	.
chr12	53914199	53920599	DB_Ctrl_dev_H3K27me3_P39_vs_E14_up_5239|6.18|4.75|1.43	0	.
chr4	94391999	94394999	DB_Ctrl_dev_H3K27me3_P39_vs_E14_up_5243|4.72|1.2|3.52	0	.
chr6	50931999	50937599	DB_Ctrl_dev_H3K27me3_P39_vs_E14_up_5245|6.13|4.53|1.59	0	.
chr2	9371399	9374399	DB_Ctrl_dev_H3K27me3_P39_vs_E14_up_5247|4.82|1.5|3.32	0	.
chr12	68214599	68219799	DB_Ctrl_dev_H3K27me3_P39_vs_E14_up_5248|5.34|2.67|2.68	0	.
chr7	115802199	115804799	DB_Ctrl_dev_H3K27me3_P39_vs_E14_up_5249|5.09|2.44|2.65	0	.
chr3	35097999	35107799	DB_Ctrl_dev_H3K27me3_P39_vs_E14_up_5251|6.73|5.58|1.15	0	.
chr12	43365399	43369399	DB_Ctrl_dev_H3K27me3_P39_vs_E14_up_5253|4.44|0.33|4.11	0	.
chr9	18526999	18530199	DB_Ctrl_dev_H3K27me3_P39_vs_E14_up_5254|4.44|0.33|4.11	0	.
chr15	57460199	57465599	DB_Ctrl_dev_H3K27me3_P39_vs_E14_up_5255|5.54|3.58|1.96	0	.
chr7	37409599	37413399	DB_Ctrl_dev_H3K27me3_P39_vs_E14_up_5256|4.57|0.87|3.7	0	.
chr4	81935999	81942199	DB_Ctrl_dev_H3K27me3_P39_vs_E14_up_5257|5.23|2.84|2.39	0	.
chr3	36297599	36304599	DB_Ctrl_dev_H3K27me3_P39_vs_E14_up_5258|5.64|3.74|1.9	0	.
chr10	92299199	92303199	DB_Ctrl_dev_H3K27me3_P39_vs_E14_up_5259|4.55|0.43|4.12	0	.
chr10	115775199	115777599	DB_Ctrl_dev_H3K27me3_P39_vs_E14_up_5260|4.89|1.92|2.98	0	.
chr18	13878799	13882999	DB_Ctrl_dev_H3K27me3_P39_vs_E14_up_5261|5.24|2.89|2.34	0	.
chr13	112043199	112046599	DB_Ctrl_dev_H3K27me3_P39_vs_E14_up_5262|5.39|3.3|2.09	0	.
chr13	48187199	48189599	DB_Ctrl_dev_H3K27me3_P39_vs_E14_up_5263|4.5|0.43|4.08	0	.
chr10	51691999	51696599	DB_Ctrl_dev_H3K27me3_P39_vs_E14_up_5264|4.74|1.28|3.46	0	.
chr8	125270799	125273199	DB_Ctrl_dev_H3K27me3_P39_vs_E14_up_5268|4.84|1.8|3.05	0	.
chr10	85375399	85383399	DB_Ctrl_dev_H3K27me3_P39_vs_E14_up_5270|6.42|5.13|1.29	0	.
chr18	74614999	74623399	DB_Ctrl_dev_H3K27me3_P39_vs_E14_up_5273|6.31|4.93|1.38	0	.
chr15	13967599	13970599	DB_Ctrl_dev_H3K27me3_P39_vs_E14_up_5275|4.84|1.72|3.12	0	.
chr10	120808799	120815199	DB_Ctrl_dev_H3K27me3_P39_vs_E14_up_5276|6.51|5.22|1.29	0	.
chr16	43531799	43536799	DB_Ctrl_dev_H3K27me3_P39_vs_E14_up_5277|5.55|3.54|2.01	0	.
chr11	75895799	75902399	DB_Ctrl_dev_H3K27me3_P39_vs_E14_up_5282|6.02|4.44|1.58	0	.
chr13	116168599	116173799	DB_Ctrl_dev_H3K27me3_P39_vs_E14_up_5287|5.63|3.7|1.93	0	.
chr1	62596799	62604399	DB_Ctrl_dev_H3K27me3_P39_vs_E14_up_5288|6|4.35|1.65	0	.
chr2	163217999	163241199	DB_Ctrl_dev_H3K27me3_P39_vs_E14_up_5291|7.88|7.14|0.74	0	.
chr7	115866999	115870199	DB_Ctrl_dev_H3K27me3_P39_vs_E14_up_5296|4.96|2.12|2.84	0	.
chr17	41474199	41476799	DB_Ctrl_dev_H3K27me3_P39_vs_E14_up_5301|4.38|-0.2|4.58	0	.
chr3	75809399	75812999	DB_Ctrl_dev_H3K27me3_P39_vs_E14_up_5306|4.38|-0.2|4.58	0	.
chr6	72237799	72249799	DB_Ctrl_dev_H3K27me3_P39_vs_E14_up_5308|7.01|5.94|1.08	0	.
chr2	51750799	51754799	DB_Ctrl_dev_H3K27me3_P39_vs_E14_up_5309|4.89|1.69|3.21	0	.
chr2	57060799	57070799	DB_Ctrl_dev_H3K27me3_P39_vs_E14_up_5311|6.33|4.74|1.58	0	.
chr8	127030399	127034599	DB_Ctrl_dev_H3K27me3_P39_vs_E14_up_5313|5.38|3.22|2.16	0	.
chr16	68899999	68903999	DB_Ctrl_dev_H3K27me3_P39_vs_E14_up_5315|4.63|1.03|3.6	0	.
chr12	53667599	53669399	DB_Ctrl_dev_H3K27me3_P39_vs_E14_up_5316|4.38|-0.2|4.58	0	.
chr13	114479999	114482199	DB_Ctrl_dev_H3K27me3_P39_vs_E14_up_5317|4.65|1.03|3.62	0	.
chr8	116094799	116098599	DB_Ctrl_dev_H3K27me3_P39_vs_E14_up_5318|4.97|1.85|3.11	0	.
chr6	140849799	140857199	DB_Ctrl_dev_H3K27me3_P39_vs_E14_up_5320|6.18|4.61|1.57	0	.
chr9	77545199	77547599	DB_Ctrl_dev_H3K27me3_P39_vs_E14_up_5326|4.54|0.72|3.81	0	.
chr9	117246399	117258399	DB_Ctrl_dev_H3K27me3_P39_vs_E14_up_5327|7.22|6.27|0.95	0	.
chr15	50909799	50912799	DB_Ctrl_dev_H3K27me3_P39_vs_E14_up_5328|4.81|1.54|3.27	0	.
chr9	50538399	50541599	DB_Ctrl_dev_H3K27me3_P39_vs_E14_up_5329|4.38|-0.2|4.58	0	.
chr3	16053999	16056999	DB_Ctrl_dev_H3K27me3_P39_vs_E14_up_5330|4.41|-0.2|4.61	0	.
chr19	28497999	28502199	DB_Ctrl_dev_H3K27me3_P39_vs_E14_up_5335|5.66|3.87|1.79	0	.
chr16	88879199	88884399	DB_Ctrl_dev_H3K27me3_P39_vs_E14_up_5336|5.79|4.1|1.7	0	.
chr18	74606199	74613199	DB_Ctrl_dev_H3K27me3_P39_vs_E14_up_5337|6.38|5.07|1.31	0	.
chr16	50573599	50578599	DB_Ctrl_dev_H3K27me3_P39_vs_E14_up_5338|5.78|3.94|1.84	0	.
chr7	135104199	135107599	DB_Ctrl_dev_H3K27me3_P39_vs_E14_up_5342|4.38|-0.2|4.58	0	.
chr2	22313599	22318599	DB_Ctrl_dev_H3K27me3_P39_vs_E14_up_5343|5.07|2.51|2.57	0	.
chr13	53276399	53290199	DB_Ctrl_dev_H3K27me3_P39_vs_E14_up_5344|7.26|6.29|0.97	0	.
chr6	14891199	14902199	DB_Ctrl_dev_H3K27me3_P39_vs_E14_up_5345|6.95|5.82|1.13	0	.
chr15	63461399	63464399	DB_Ctrl_dev_H3K27me3_P39_vs_E14_up_5351|4.38|-0.2|4.58	0	.
chr8	26214999	26219199	DB_Ctrl_dev_H3K27me3_P39_vs_E14_up_5352|4.38|-0.2|4.58	0	.
chr2	139787799	139794799	DB_Ctrl_dev_H3K27me3_P39_vs_E14_up_5356|5.82|4.06|1.76	0	.
chr10	97063199	97068199	DB_Ctrl_dev_H3K27me3_P39_vs_E14_up_5358|5.14|2.58|2.56	0	.
chr2	135581599	135584999	DB_Ctrl_dev_H3K27me3_P39_vs_E14_up_5359|5.5|3.46|2.03	0	.
chr10	51288999	51294799	DB_Ctrl_dev_H3K27me3_P39_vs_E14_up_5361|5.19|2.69|2.5	0	.
chr10	19433399	19436399	DB_Ctrl_dev_H3K27me3_P39_vs_E14_up_5362|5.61|3.79|1.83	0	.
chr10	74048399	74058599	DB_Ctrl_dev_H3K27me3_P39_vs_E14_up_5363|6.6|5.4|1.2	0	.
chr2	126382799	126385999	DB_Ctrl_dev_H3K27me3_P39_vs_E14_up_5364|4.71|1.28|3.43	0	.
chr1	67263999	67265599	DB_Ctrl_dev_H3K27me3_P39_vs_E14_up_5365|4.38|-0.2|4.58	0	.
chr2	10934399	10937799	DB_Ctrl_dev_H3K27me3_P39_vs_E14_up_5367|4.71|1.43|3.28	0	.
chr6	124137399	124141599	DB_Ctrl_dev_H3K27me3_P39_vs_E14_up_5368|4.77|1.47|3.29	0	.
chr9	107476999	107489999	DB_Ctrl_dev_H3K27me3_P39_vs_E14_up_5374|7.2|6.19|1.01	0	.
chr3	154465399	154469599	DB_Ctrl_dev_H3K27me3_P39_vs_E14_up_5377|5.13|2.67|2.46	0	.
chr4	55774799	55776199	DB_Ctrl_dev_H3K27me3_P39_vs_E14_up_5380|4.41|-0.2|4.61	0	.
chr7	107780399	107784199	DB_Ctrl_dev_H3K27me3_P39_vs_E14_up_5382|5.41|3.18|2.24	0	.
chr10	121039599	121043599	DB_Ctrl_dev_H3K27me3_P39_vs_E14_up_5388|5.16|2.64|2.52	0	.
chr1	72823999	72826999	DB_Ctrl_dev_H3K27me3_P39_vs_E14_up_5391|4.38|-0.2|4.59	0	.
chr6	34751999	34754399	DB_Ctrl_dev_H3K27me3_P39_vs_E14_up_5392|4.38|-0.2|4.59	0	.
chr15	51103199	51105799	DB_Ctrl_dev_H3K27me3_P39_vs_E14_up_5395|4.65|1.09|3.56	0	.
chr6	48848999	48854999	DB_Ctrl_dev_H3K27me3_P39_vs_E14_up_5396|6.03|4.43|1.6	0	.
chr2	59785999	59791399	DB_Ctrl_dev_H3K27me3_P39_vs_E14_up_5397|5.07|2.13|2.94	0	.
chr2	163364399	163396199	DB_Ctrl_dev_H3K27me3_P39_vs_E14_up_5398|8.38|7.76|0.62	0	.
chr13	114582399	114585999	DB_Ctrl_dev_H3K27me3_P39_vs_E14_up_5399|5.45|3.24|2.21	0	.
chr11	18277399	18279199	DB_Ctrl_dev_H3K27me3_P39_vs_E14_up_5404|4.37|-0.2|4.58	0	.
chr3	145727199	145731999	DB_Ctrl_dev_H3K27me3_P39_vs_E14_up_5405|5.54|3.59|1.95	0	.
chr14	57121199	57125799	DB_Ctrl_dev_H3K27me3_P39_vs_E14_up_5407|5.25|2.92|2.33	0	.
chr19	14122999	14126399	DB_Ctrl_dev_H3K27me3_P39_vs_E14_up_5409|5.41|3.36|2.06	0	.
chr8	89018999	89058199	DB_Ctrl_dev_H3K27me3_P39_vs_E14_up_5412|9.35|8.85|0.5	0	.
chr2	170068199	170073599	DB_Ctrl_dev_H3K27me3_P39_vs_E14_up_5414|6.23|4.59|1.63	0	.
chr11	34728199	34733799	DB_Ctrl_dev_H3K27me3_P39_vs_E14_up_5417|6.16|4.6|1.56	0	.
chr14	68192399	68199799	DB_Ctrl_dev_H3K27me3_P39_vs_E14_up_5419|5.82|4.18|1.64	0	.
chr6	140795799	140801399	DB_Ctrl_dev_H3K27me3_P39_vs_E14_up_5421|6.19|4.73|1.45	0	.
chr3	131695399	131701199	DB_Ctrl_dev_H3K27me3_P39_vs_E14_up_5423|5.54|3.63|1.91	0	.
chr1	150925999	150929199	DB_Ctrl_dev_H3K27me3_P39_vs_E14_up_5427|5.14|2.52|2.62	0	.
chr3	133113799	133117199	DB_Ctrl_dev_H3K27me3_P39_vs_E14_up_5428|4.41|0.33|4.08	0	.
chr3	83607599	83616599	DB_Ctrl_dev_H3K27me3_P39_vs_E14_up_5429|6.05|4.55|1.5	0	.
chr14	102502399	102506399	DB_Ctrl_dev_H3K27me3_P39_vs_E14_up_5430|4.74|1.28|3.46	0	.
chr4	131140399	131144399	DB_Ctrl_dev_H3K27me3_P39_vs_E14_up_5433|4.94|1.85|3.09	0	.
chr15	9933799	9935799	DB_Ctrl_dev_H3K27me3_P39_vs_E14_up_5436|4.41|0.33|4.08	0	.
chr6	16548599	16551999	DB_Ctrl_dev_H3K27me3_P39_vs_E14_up_5437|4.41|0.33|4.08	0	.
chr14	118430199	118441399	DB_Ctrl_dev_H3K27me3_P39_vs_E14_up_5439|7.58|6.76|0.81	0	.
chr11	45264399	45268599	DB_Ctrl_dev_H3K27me3_P39_vs_E14_up_5440|5.18|2.37|2.81	0	.
chr3	147884799	147888199	DB_Ctrl_dev_H3K27me3_P39_vs_E14_up_5441|5.09|2.56|2.53	0	.
chr18	55144399	55149799	DB_Ctrl_dev_H3K27me3_P39_vs_E14_up_5443|5.83|4.05|1.78	0	.
chr4	81959999	81962599	DB_Ctrl_dev_H3K27me3_P39_vs_E14_up_5445|4.51|0.72|3.79	0	.
chr3	15176599	15181999	DB_Ctrl_dev_H3K27me3_P39_vs_E14_up_5446|5.57|3.54|2.03	0	.
chr6	22186999	22190399	DB_Ctrl_dev_H3K27me3_P39_vs_E14_up_5447|4.77|1.47|3.3	0	.
chr13	47959599	47965399	DB_Ctrl_dev_H3K27me3_P39_vs_E14_up_5448|5.9|4.28|1.63	0	.
chr9	119587999	119598999	DB_Ctrl_dev_H3K27me3_P39_vs_E14_up_5449|6.31|4.93|1.38	0	.
chr2	11082599	11087199	DB_Ctrl_dev_H3K27me3_P39_vs_E14_up_5450|5.45|3.39|2.05	0	.
chr3	126069999	126073199	DB_Ctrl_dev_H3K27me3_P39_vs_E14_up_5456|4.37|-0.2|4.58	0	.
chr14	98400999	98406599	DB_Ctrl_dev_H3K27me3_P39_vs_E14_up_5457|5.74|3.89|1.85	0	.
chr13	32407999	32415199	DB_Ctrl_dev_H3K27me3_P39_vs_E14_up_5461|6.31|4.9|1.4	0	.
chr13	85995999	85998199	DB_Ctrl_dev_H3K27me3_P39_vs_E14_up_5463|4.34|-0.2|4.55	0	.
chr1	186176399	186183599	DB_Ctrl_dev_H3K27me3_P39_vs_E14_up_5465|5.77|3.99|1.78	0	.
chr19	49812399	49816199	DB_Ctrl_dev_H3K27me3_P39_vs_E14_up_5466|4.34|-0.2|4.55	0	.
chr18	13721199	13725799	DB_Ctrl_dev_H3K27me3_P39_vs_E14_up_5469|5.79|4.13|1.66	0	.
chr3	145883999	145886399	DB_Ctrl_dev_H3K27me3_P39_vs_E14_up_5470|4.34|-0.2|4.55	0	.
chr13	39583599	39586399	DB_Ctrl_dev_H3K27me3_P39_vs_E14_up_5472|4.34|-0.2|4.55	0	.
chr2	99520199	99523999	DB_Ctrl_dev_H3K27me3_P39_vs_E14_up_5473|4.34|-0.2|4.55	0	.
chr4	89768799	89780399	DB_Ctrl_dev_H3K27me3_P39_vs_E14_up_5474|6.31|4.9|1.4	0	.
chr2	22224199	22232999	DB_Ctrl_dev_H3K27me3_P39_vs_E14_up_5475|6.5|5.17|1.34	0	.
chr14	101377399	101383599	DB_Ctrl_dev_H3K27me3_P39_vs_E14_up_5481|6.21|4.63|1.57	0	.
chr10	19421199	19427399	DB_Ctrl_dev_H3K27me3_P39_vs_E14_up_5482|5.26|2.7|2.55	0	.
chr2	76226199	76233999	DB_Ctrl_dev_H3K27me3_P39_vs_E14_up_5483|6.09|4.46|1.64	0	.
chr1	97077799	97083399	DB_Ctrl_dev_H3K27me3_P39_vs_E14_up_5484|5.21|2.76|2.45	0	.
chr18	56187999	56191199	DB_Ctrl_dev_H3K27me3_P39_vs_E14_up_5487|4.96|2.22|2.75	0	.
chr7	3958999	3962599	DB_Ctrl_dev_H3K27me3_P39_vs_E14_up_5488|4.44|-0.2|4.64	0	.
chr15	51098599	51102199	DB_Ctrl_dev_H3K27me3_P39_vs_E14_up_5489|4.96|2.22|2.75	0	.
chr1	58271599	58274399	DB_Ctrl_dev_H3K27me3_P39_vs_E14_up_5493|4.34|-0.2|4.55	0	.
chr11	101453599	101455999	DB_Ctrl_dev_H3K27me3_P39_vs_E14_up_5494|4.34|-0.2|4.55	0	.
chr3	99762599	99764999	DB_Ctrl_dev_H3K27me3_P39_vs_E14_up_5495|4.34|-0.2|4.55	0	.
chr9	117005799	117010199	DB_Ctrl_dev_H3K27me3_P39_vs_E14_up_5500|5.66|3.78|1.88	0	.
chr11	76367199	76372799	DB_Ctrl_dev_H3K27me3_P39_vs_E14_up_5501|5.68|3.9|1.79	0	.
chr11	91351199	91353599	DB_Ctrl_dev_H3K27me3_P39_vs_E14_up_5502|4.34|-0.2|4.55	0	.
chr12	75984599	75988399	DB_Ctrl_dev_H3K27me3_P39_vs_E14_up_5503|4.34|-0.2|4.55	0	.
chr9	116932799	116944799	DB_Ctrl_dev_H3K27me3_P39_vs_E14_up_5505|6.69|5.56|1.13	0	.
chr18	74592399	74595999	DB_Ctrl_dev_H3K27me3_P39_vs_E14_up_5506|5.79|4.12|1.67	0	.
chr4	82703199	82706399	DB_Ctrl_dev_H3K27me3_P39_vs_E14_up_5507|5.67|3.77|1.9	0	.
chr10	112176399	112177999	DB_Ctrl_dev_H3K27me3_P39_vs_E14_up_5509|4.44|0.33|4.11	0	.
chr15	93754999	93757999	DB_Ctrl_dev_H3K27me3_P39_vs_E14_up_5512|5.27|2.99|2.28	0	.
chr19	24688599	24697799	DB_Ctrl_dev_H3K27me3_P39_vs_E14_up_5513|6.21|4.67|1.54	0	.
chr4	84027199	84033399	DB_Ctrl_dev_H3K27me3_P39_vs_E14_up_5514|5.41|3.37|2.04	0	.
chr4	89123399	89130599	DB_Ctrl_dev_H3K27me3_P39_vs_E14_up_5516|6|4.2|1.8	0	.
chr1	138785199	138788799	DB_Ctrl_dev_H3K27me3_P39_vs_E14_up_5518|4.41|0.43|3.98	0	.
chr16	96291199	96292599	DB_Ctrl_dev_H3K27me3_P39_vs_E14_up_5519|4.41|0.43|3.98	0	.
chr7	133228599	133232999	DB_Ctrl_dev_H3K27me3_P39_vs_E14_up_5522|5.17|2.61|2.56	0	.
chr2	172481399	172495199	DB_Ctrl_dev_H3K27me3_P39_vs_E14_up_5523|6.84|5.74|1.1	0	.
chr13	111951599	111963199	DB_Ctrl_dev_H3K27me3_P39_vs_E14_up_5525|6.96|5.75|1.21	0	.
chr17	72358799	72369199	DB_Ctrl_dev_H3K27me3_P39_vs_E14_up_5526|6.22|4.85|1.38	0	.
chr8	114800999	114806199	DB_Ctrl_dev_H3K27me3_P39_vs_E14_up_5530|5.36|3.2|2.16	0	.
chr19	24370399	24373199	DB_Ctrl_dev_H3K27me3_P39_vs_E14_up_5531|4.6|1.03|3.57	0	.
chr1	190511399	190521399	DB_Ctrl_dev_H3K27me3_P39_vs_E14_up_5532|6.38|4.97|1.41	0	.
chr5	27022799	27027599	DB_Ctrl_dev_H3K27me3_P39_vs_E14_up_5533|5.74|3.95|1.79	0	.
chr2	67432399	67435599	DB_Ctrl_dev_H3K27me3_P39_vs_E14_up_5535|4.6|1.03|3.57	0	.
chr15	27063199	27066599	DB_Ctrl_dev_H3K27me3_P39_vs_E14_up_5536|4.79|1.5|3.29	0	.
chr5	101425399	101435199	DB_Ctrl_dev_H3K27me3_P39_vs_E14_up_5537|6.53|5.3|1.23	0	.
chr18	81640599	81651999	DB_Ctrl_dev_H3K27me3_P39_vs_E14_up_5538|7.17|6.22|0.94	0	.
chr12	14422399	14427399	DB_Ctrl_dev_H3K27me3_P39_vs_E14_up_5539|5.27|2.57|2.7	0	.
chr14	52031599	52038399	DB_Ctrl_dev_H3K27me3_P39_vs_E14_up_5541|5.62|3.77|1.85	0	.
chr3	145788399	145794599	DB_Ctrl_dev_H3K27me3_P39_vs_E14_up_5542|5.88|4.21|1.67	0	.
chr4	100514999	100533199	DB_Ctrl_dev_H3K27me3_P39_vs_E14_up_5543|7.47|6.63|0.83	0	.
chr18	68761599	68765599	DB_Ctrl_dev_H3K27me3_P39_vs_E14_up_5547|4.82|1.83|2.99	0	.
chr4	12596199	12605399	DB_Ctrl_dev_H3K27me3_P39_vs_E14_up_5548|6.36|5.04|1.32	0	.
chr17	69459599	69463199	DB_Ctrl_dev_H3K27me3_P39_vs_E14_up_5549|4.74|1.62|3.12	0	.
chr16	87774999	87778199	DB_Ctrl_dev_H3K27me3_P39_vs_E14_up_5550|5.21|2.91|2.31	0	.
chr3	30093399	30095799	DB_Ctrl_dev_H3K27me3_P39_vs_E14_up_5553|4.34|-0.2|4.54	0	.
chr4	100177799	100180799	DB_Ctrl_dev_H3K27me3_P39_vs_E14_up_5554|4.34|-0.2|4.54	0	.
chr6	141200199	141201999	DB_Ctrl_dev_H3K27me3_P39_vs_E14_up_5555|4.34|-0.2|4.54	0	.
chr6	145726199	145728199	DB_Ctrl_dev_H3K27me3_P39_vs_E14_up_5556|4.34|-0.2|4.54	0	.
chr7	51729399	51731999	DB_Ctrl_dev_H3K27me3_P39_vs_E14_up_5557|4.34|-0.2|4.54	0	.
chr2	145700199	145705399	DB_Ctrl_dev_H3K27me3_P39_vs_E14_up_5558|5.33|3.04|2.28	0	.
chr16	76597399	76600999	DB_Ctrl_dev_H3K27me3_P39_vs_E14_up_5559|5.43|3.42|2.01	0	.
chr11	63439199	63443999	DB_Ctrl_dev_H3K27me3_P39_vs_E14_up_5560|5.43|3.43|1.99	0	.
chr18	4744599	4748399	DB_Ctrl_dev_H3K27me3_P39_vs_E14_up_5561|4.57|0.87|3.7	0	.
chr3	125624399	125627399	DB_Ctrl_dev_H3K27me3_P39_vs_E14_up_5562|4.38|-0.2|4.59	0	.
chr7	115914399	115918199	DB_Ctrl_dev_H3K27me3_P39_vs_E14_up_5564|4.74|1.58|3.16	0	.
chr6	100523999	100528799	DB_Ctrl_dev_H3K27me3_P39_vs_E14_up_5565|6.09|4.62|1.48	0	.
chr1	186948799	186952599	DB_Ctrl_dev_H3K27me3_P39_vs_E14_up_5566|4.41|0.43|3.99	0	.
chrX	56819799	56823399	DB_Ctrl_dev_H3K27me3_P39_vs_E14_up_5567|5.69|3.91|1.78	0	.
chr3	146260999	146264999	DB_Ctrl_dev_H3K27me3_P39_vs_E14_up_5568|4.94|2.12|2.82	0	.
chr19	30168599	30176799	DB_Ctrl_dev_H3K27me3_P39_vs_E14_up_5569|6.3|4.95|1.35	0	.
chr9	65265799	65270399	DB_Ctrl_dev_H3K27me3_P39_vs_E14_up_5572|5.07|2.42|2.65	0	.
chr17	67016999	67021999	DB_Ctrl_dev_H3K27me3_P39_vs_E14_up_5573|5.52|3.63|1.9	0	.
chr9	91124199	91129199	DB_Ctrl_dev_H3K27me3_P39_vs_E14_up_5575|5.6|3.7|1.9	0	.
chr2	169992599	170001399	DB_Ctrl_dev_H3K27me3_P39_vs_E14_up_5576|6.59|5.38|1.21	0	.
chr12	77935399	77946799	DB_Ctrl_dev_H3K27me3_P39_vs_E14_up_5577|6.16|4.75|1.42	0	.
chr3	65640199	65643599	DB_Ctrl_dev_H3K27me3_P39_vs_E14_up_5578|4.69|1.28|3.4	0	.
chr5	132841399	132845999	DB_Ctrl_dev_H3K27me3_P39_vs_E14_up_5579|5.31|2.96|2.35	0	.
chr2	34272799	34282999	DB_Ctrl_dev_H3K27me3_P39_vs_E14_up_5583|6.01|4.49|1.51	0	.
chr8	89416399	89422799	DB_Ctrl_dev_H3K27me3_P39_vs_E14_up_5585|5.85|4.17|1.68	0	.
chr10	115778399	115790599	DB_Ctrl_dev_H3K27me3_P39_vs_E14_up_5586|6.65|5.41|1.24	0	.
chr2	144977799	144981199	DB_Ctrl_dev_H3K27me3_P39_vs_E14_up_5591|4.35|-0.2|4.55	0	.
chr4	82698599	82702399	DB_Ctrl_dev_H3K27me3_P39_vs_E14_up_5594|4.69|1.28|3.4	0	.
chr5	60923999	60927199	DB_Ctrl_dev_H3K27me3_P39_vs_E14_up_5597|4.74|1.62|3.12	0	.
chr2	93327599	93332399	DB_Ctrl_dev_H3K27me3_P39_vs_E14_up_5601|5.67|3.88|1.79	0	.
chr19	22039999	22041999	DB_Ctrl_dev_H3K27me3_P39_vs_E14_up_5602|4.41|0.33|4.08	0	.
chr4	94358599	94362999	DB_Ctrl_dev_H3K27me3_P39_vs_E14_up_5603|5.7|3.85|1.85	0	.
chr8	50283799	50287399	DB_Ctrl_dev_H3K27me3_P39_vs_E14_up_5608|5.17|2.37|2.8	0	.
chr14	9449399	9453399	DB_Ctrl_dev_H3K27me3_P39_vs_E14_up_5610|4.99|2|2.99	0	.
chr14	48807799	48812399	DB_Ctrl_dev_H3K27me3_P39_vs_E14_up_5613|5.29|3.12|2.17	0	.
chr5	69601799	69606999	DB_Ctrl_dev_H3K27me3_P39_vs_E14_up_5614|4.89|1.88|3	0	.
chr13	32439199	32441399	DB_Ctrl_dev_H3K27me3_P39_vs_E14_up_5615|4.47|0.33|4.14	0	.
chr4	124249199	124261999	DB_Ctrl_dev_H3K27me3_P39_vs_E14_up_5616|7|6|1	0	.
chr1	68998799	69002599	DB_Ctrl_dev_H3K27me3_P39_vs_E14_up_5620|4.74|1.47|3.27	0	.
chr17	72195799	72202799	DB_Ctrl_dev_H3K27me3_P39_vs_E14_up_5622|6.02|4.19|1.83	0	.
chr6	97526799	97530999	DB_Ctrl_dev_H3K27me3_P39_vs_E14_up_5625|5.84|4.22|1.62	0	.
chr12	57499799	57502399	DB_Ctrl_dev_H3K27me3_P39_vs_E14_up_5626|4.68|1.28|3.4	0	.
chr16	86327399	86330599	DB_Ctrl_dev_H3K27me3_P39_vs_E14_up_5627|4.68|1.28|3.4	0	.
chr10	19405999	19419999	DB_Ctrl_dev_H3K27me3_P39_vs_E14_up_5629|6.81|5.72|1.08	0	.
chr11	112196799	112198999	DB_Ctrl_dev_H3K27me3_P39_vs_E14_up_5630|4.31|-0.2|4.51	0	.
chr12	16086799	16088999	DB_Ctrl_dev_H3K27me3_P39_vs_E14_up_5631|4.38|0.33|4.04	0	.
chr18	7755599	7762999	DB_Ctrl_dev_H3K27me3_P39_vs_E14_up_5633|5.82|4.13|1.69	0	.
chr4	74495199	74498799	DB_Ctrl_dev_H3K27me3_P39_vs_E14_up_5634|4.31|-0.2|4.51	0	.
chr9	46522799	46525999	DB_Ctrl_dev_H3K27me3_P39_vs_E14_up_5638|4.54|0.87|3.68	0	.
chr11	88319399	88321999	DB_Ctrl_dev_H3K27me3_P39_vs_E14_up_5639|4.38|0.33|4.05	0	.
chr4	51246799	51249799	DB_Ctrl_dev_H3K27me3_P39_vs_E14_up_5641|4.31|-0.2|4.51	0	.
chr1	161686199	161691999	DB_Ctrl_dev_H3K27me3_P39_vs_E14_up_5642|5.16|2.37|2.78	0	.
chr18	54717399	54722199	DB_Ctrl_dev_H3K27me3_P39_vs_E14_up_5643|4.98|2|2.98	0	.
chr13	53085399	53087999	DB_Ctrl_dev_H3K27me3_P39_vs_E14_up_5647|4.31|-0.2|4.51	0	.
chr8	56635599	56637799	DB_Ctrl_dev_H3K27me3_P39_vs_E14_up_5648|4.31|-0.2|4.51	0	.
chr8	89746199	89756199	DB_Ctrl_dev_H3K27me3_P39_vs_E14_up_5651|6.91|5.81|1.1	0	.
chr5	67132799	67144199	DB_Ctrl_dev_H3K27me3_P39_vs_E14_up_5653|7.06|6.04|1.03	0	.
chr2	9711199	9714399	DB_Ctrl_dev_H3K27me3_P39_vs_E14_up_5655|4.34|-0.2|4.54	0	.
chr4	10499199	10503999	DB_Ctrl_dev_H3K27me3_P39_vs_E14_up_5656|6|4.39|1.61	0	.
chr17	43514999	43521799	DB_Ctrl_dev_H3K27me3_P39_vs_E14_up_5658|6.01|4.5|1.5	0	.
chr17	53731599	53733799	DB_Ctrl_dev_H3K27me3_P39_vs_E14_up_5660|4.31|-0.2|4.51	0	.
chr8	23066999	23074199	DB_Ctrl_dev_H3K27me3_P39_vs_E14_up_5662|5.87|4.24|1.63	0	.
chr8	109112799	109115799	DB_Ctrl_dev_H3K27me3_P39_vs_E14_up_5663|4.31|-0.2|4.51	0	.
chr10	105093999	105097799	DB_Ctrl_dev_H3K27me3_P39_vs_E14_up_5665|5.54|3.48|2.06	0	.
chr1	40227999	40234199	DB_Ctrl_dev_H3K27me3_P39_vs_E14_up_5666|6.06|4.39|1.67	0	.
chr16	25941999	25950199	DB_Ctrl_dev_H3K27me3_P39_vs_E14_up_5667|5.7|3.97|1.73	0	.
chr14	104478999	104481399	DB_Ctrl_dev_H3K27me3_P39_vs_E14_up_5668|4.38|0.33|4.04	0	.
chr5	112084199	112092799	DB_Ctrl_dev_H3K27me3_P39_vs_E14_up_5669|6.16|4.75|1.4	0	.
chr6	15406399	15409199	DB_Ctrl_dev_H3K27me3_P39_vs_E14_up_5671|4.51|0.87|3.65	0	.
chr1	191573199	191575199	DB_Ctrl_dev_H3K27me3_P39_vs_E14_up_5672|4.84|1.92|2.93	0	.
chr3	145739999	145744599	DB_Ctrl_dev_H3K27me3_P39_vs_E14_up_5673|6.1|4.54|1.56	0	.
chr1	190016799	190019999	DB_Ctrl_dev_H3K27me3_P39_vs_E14_up_5675|5.73|4.04|1.68	0	.
chr1	113732799	113737199	DB_Ctrl_dev_H3K27me3_P39_vs_E14_up_5676|5.15|2.73|2.42	0	.
chr2	48625799	48635199	DB_Ctrl_dev_H3K27me3_P39_vs_E14_up_5677|6.43|5.1|1.33	0	.
chr1	89403799	89410399	DB_Ctrl_dev_H3K27me3_P39_vs_E14_up_5679|5.99|4.43|1.56	0	.
chr8	53597999	53601399	DB_Ctrl_dev_H3K27me3_P39_vs_E14_up_5680|5.03|2.46|2.57	0	.
chr10	115753399	115757199	DB_Ctrl_dev_H3K27me3_P39_vs_E14_up_5684|5.18|2.72|2.45	0	.
chr2	113931399	113934799	DB_Ctrl_dev_H3K27me3_P39_vs_E14_up_5685|4.96|2.03|2.93	0	.
chr9	61830999	61833999	DB_Ctrl_dev_H3K27me3_P39_vs_E14_up_5688|4.31|-0.2|4.51	0	.
chr8	90150599	90155799	DB_Ctrl_dev_H3K27me3_P39_vs_E14_up_5690|5.63|3.86|1.77	0	.
chr11	18591599	18596999	DB_Ctrl_dev_H3K27me3_P39_vs_E14_up_5691|5.39|3.12|2.27	0	.
chr14	33665399	33666599	DB_Ctrl_dev_H3K27me3_P39_vs_E14_up_5693|4.38|0.33|4.05	0	.
chr2	11358999	11361799	DB_Ctrl_dev_H3K27me3_P39_vs_E14_up_5695|4.38|0.43|3.95	0	.
chr5	96977199	96983399	DB_Ctrl_dev_H3K27me3_P39_vs_E14_up_5696|6.03|4.54|1.49	0	.
chr7	82423999	82426599	DB_Ctrl_dev_H3K27me3_P39_vs_E14_up_5697|4.68|1.28|3.4	0	.
chr2	158151399	158157399	DB_Ctrl_dev_H3K27me3_P39_vs_E14_up_5702|5.92|4.23|1.69	0	.
chr6	93011599	93017399	DB_Ctrl_dev_H3K27me3_P39_vs_E14_up_5703|5.2|2.62|2.58	0	.
chr16	25873399	25877999	DB_Ctrl_dev_H3K27me3_P39_vs_E14_up_5705|5.18|2.52|2.66	0	.
chr2	50568199	50570799	DB_Ctrl_dev_H3K27me3_P39_vs_E14_up_5706|4.94|2.24|2.7	0	.
chr4	63407199	63409799	DB_Ctrl_dev_H3K27me3_P39_vs_E14_up_5707|5.18|2.72|2.45	0	.
chr12	47185799	47187999	DB_Ctrl_dev_H3K27me3_P39_vs_E14_up_5709|4.38|0.43|3.95	0	.
chr6	137640399	137645799	DB_Ctrl_dev_H3K27me3_P39_vs_E14_up_5711|5.77|4.07|1.69	0	.
chr3	83774399	83779599	DB_Ctrl_dev_H3K27me3_P39_vs_E14_up_5712|5.49|3.21|2.28	0	.
chr1	96045599	96047199	DB_Ctrl_dev_H3K27me3_P39_vs_E14_up_5716|4.34|-0.2|4.54	0	.
chr8	26956799	26963799	DB_Ctrl_dev_H3K27me3_P39_vs_E14_up_5718|5.83|4.13|1.7	0	.
chr13	32415999	32422999	DB_Ctrl_dev_H3K27me3_P39_vs_E14_up_5719|5.94|4.33|1.61	0	.
chr8	92806199	92811199	DB_Ctrl_dev_H3K27me3_P39_vs_E14_up_5721|5.63|3.82|1.81	0	.
chr2	11146799	11159599	DB_Ctrl_dev_H3K27me3_P39_vs_E14_up_5722|6.93|5.87|1.06	0	.
chr15	7441799	7446399	DB_Ctrl_dev_H3K27me3_P39_vs_E14_up_5724|5.56|3.6|1.96	0	.
chr1	187752799	187756999	DB_Ctrl_dev_H3K27me3_P39_vs_E14_up_5726|5.21|2.92|2.3	0	.
chr9	77506999	77513999	DB_Ctrl_dev_H3K27me3_P39_vs_E14_up_5727|6.17|4.76|1.41	0	.
chr5	50765599	50769799	DB_Ctrl_dev_H3K27me3_P39_vs_E14_up_5728|4.6|1.03|3.57	0	.
chr6	147388199	147394199	DB_Ctrl_dev_H3K27me3_P39_vs_E14_up_5729|6.06|4.59|1.47	0	.
chr13	117083999	117086599	DB_Ctrl_dev_H3K27me3_P39_vs_E14_up_5731|5.09|2.26|2.84	0	.
chr2	169662799	169669999	DB_Ctrl_dev_H3K27me3_P39_vs_E14_up_5732|6|4.52|1.48	0	.
chr7	51972599	51979399	DB_Ctrl_dev_H3K27me3_P39_vs_E14_up_5733|5.6|3.8|1.8	0	.
chr7	105785799	105789799	DB_Ctrl_dev_H3K27me3_P39_vs_E14_up_5735|5.49|3.28|2.21	0	.
chr17	83118999	83123199	DB_Ctrl_dev_H3K27me3_P39_vs_E14_up_5736|5.7|3.94|1.75	0	.
chr2	163317799	163328399	DB_Ctrl_dev_H3K27me3_P39_vs_E14_up_5737|6.82|5.77|1.06	0	.
chr5	67190599	67193599	DB_Ctrl_dev_H3K27me3_P39_vs_E14_up_5738|4.57|1.03|3.54	0	.
chr14	22324199	22333199	DB_Ctrl_dev_H3K27me3_P39_vs_E14_up_5739|5.91|4.19|1.72	0	.
chr6	49208999	49211999	DB_Ctrl_dev_H3K27me3_P39_vs_E14_up_5744|4.99|2.33|2.65	0	.
chr5	51321599	51323799	DB_Ctrl_dev_H3K27me3_P39_vs_E14_up_5745|4.89|2.12|2.78	0	.
chr3	142291199	142295999	DB_Ctrl_dev_H3K27me3_P39_vs_E14_up_5746|5.08|2.53|2.55	0	.
chr12	105245399	105251399	DB_Ctrl_dev_H3K27me3_P39_vs_E14_up_5747|6.26|4.85|1.42	0	.
chr16	75855999	75862999	DB_Ctrl_dev_H3K27me3_P39_vs_E14_up_5748|6.24|4.74|1.5	0	.
chr2	172053799	172059199	DB_Ctrl_dev_H3K27me3_P39_vs_E14_up_5750|5.54|3.53|2.01	0	.
chr2	178594199	178600799	DB_Ctrl_dev_H3K27me3_P39_vs_E14_up_5753|6.21|4.54|1.67	0	.
chr11	34815999	34820799	DB_Ctrl_dev_H3K27me3_P39_vs_E14_up_5766|5.05|2.13|2.92	0	.
chr15	5822599	5825799	DB_Ctrl_dev_H3K27me3_P39_vs_E14_up_5768|4.65|1.2|3.45	0	.
chr6	6795799	6798399	DB_Ctrl_dev_H3K27me3_P39_vs_E14_up_5769|4.63|1.38|3.25	0	.
chr16	87765199	87766999	DB_Ctrl_dev_H3K27me3_P39_vs_E14_up_5772|4.71|1.62|3.09	0	.
chr10	64659599	64662199	DB_Ctrl_dev_H3K27me3_P39_vs_E14_up_5773|4.63|1.38|3.25	0	.
chr12	69414599	69420599	DB_Ctrl_dev_H3K27me3_P39_vs_E14_up_5774|5.83|3.88|1.96	0	.
chr9	77424799	77432199	DB_Ctrl_dev_H3K27me3_P39_vs_E14_up_5776|6|4.48|1.52	0	.
chr2	47347599	47351399	DB_Ctrl_dev_H3K27me3_P39_vs_E14_up_5777|4.65|1.33|3.32	0	.
chr11	44691199	44702799	DB_Ctrl_dev_H3K27me3_P39_vs_E14_up_5779|6.88|5.82|1.06	0	.
chr4	65382599	65387999	DB_Ctrl_dev_H3K27me3_P39_vs_E14_up_5782|5.25|2.57|2.68	0	.
chr17	72332399	72344199	DB_Ctrl_dev_H3K27me3_P39_vs_E14_up_5784|6.58|5.41|1.17	0	.
chr12	118113199	118117599	DB_Ctrl_dev_H3K27me3_P39_vs_E14_up_5785|5.56|3.47|2.09	0	.
chr14	98407599	98410599	DB_Ctrl_dev_H3K27me3_P39_vs_E14_up_5786|4.27|-0.2|4.48	0	.
chr9	117517599	117519199	DB_Ctrl_dev_H3K27me3_P39_vs_E14_up_5787|4.27|-0.2|4.48	0	.
chr13	107930399	107936399	DB_Ctrl_dev_H3K27me3_P39_vs_E14_up_5790|5.8|4.1|1.7	0	.
chr16	71494999	71499199	DB_Ctrl_dev_H3K27me3_P39_vs_E14_up_5791|4.54|1.09|3.45	0	.
chr15	7424999	7427999	DB_Ctrl_dev_H3K27me3_P39_vs_E14_up_5792|4.3|-0.2|4.51	0	.
chr18	13866999	13871599	DB_Ctrl_dev_H3K27me3_P39_vs_E14_up_5793|5.55|3.52|2.03	0	.
chr1	6858999	6862599	DB_Ctrl_dev_H3K27me3_P39_vs_E14_up_5794|5.19|2.48|2.72	0	.
chr7	67935999	67942199	DB_Ctrl_dev_H3K27me3_P39_vs_E14_up_5796|5.68|3.7|1.98	0	.
chr16	23757399	23761999	DB_Ctrl_dev_H3K27me3_P39_vs_E14_up_5797|5.38|3.18|2.2	0	.
chr6	145737999	145746199	DB_Ctrl_dev_H3K27me3_P39_vs_E14_up_5798|6.4|5.12|1.28	0	.
chr16	63457199	63460199	DB_Ctrl_dev_H3K27me3_P39_vs_E14_up_5799|4.27|-0.2|4.47	0	.
chr6	146422599	146428199	DB_Ctrl_dev_H3K27me3_P39_vs_E14_up_5800|5.78|3.92|1.86	0	.
chr18	14062799	14065399	DB_Ctrl_dev_H3K27me3_P39_vs_E14_up_5801|4.92|2.03|2.89	0	.
chr1	191081799	191084799	DB_Ctrl_dev_H3K27me3_P39_vs_E14_up_5803|5.29|3.09|2.2	0	.
chr14	110753399	110758199	DB_Ctrl_dev_H3K27me3_P39_vs_E14_up_5806|5.9|4.35|1.55	0	.
chr4	35360999	35372599	DB_Ctrl_dev_H3K27me3_P39_vs_E14_up_5807|6.53|5.35|1.19	0	.
chr17	67220999	67227599	DB_Ctrl_dev_H3K27me3_P39_vs_E14_up_5808|5.46|3.07|2.39	0	.
chr6	25917599	25920599	DB_Ctrl_dev_H3K27me3_P39_vs_E14_up_5809|4.44|0.8|3.65	0	.
chr13	114631599	114634199	DB_Ctrl_dev_H3K27me3_P39_vs_E14_up_5810|4.92|2.03|2.89	0	.
chr17	72382199	72391599	DB_Ctrl_dev_H3K27me3_P39_vs_E14_up_5811|6.3|4.92|1.39	0	.
chr3	126202399	126206999	DB_Ctrl_dev_H3K27me3_P39_vs_E14_up_5812|4.77|1.76|3.01	0	.
chr12	54051399	54054799	DB_Ctrl_dev_H3K27me3_P39_vs_E14_up_5813|5.13|2.76|2.37	0	.
chr2	115502999	115505199	DB_Ctrl_dev_H3K27me3_P39_vs_E14_up_5814|4.27|-0.2|4.48	0	.
chr16	88006199	88008999	DB_Ctrl_dev_H3K27me3_P39_vs_E14_up_5815|4.37|0.33|4.04	0	.
chr12	68332599	68334799	DB_Ctrl_dev_H3K27me3_P39_vs_E14_up_5819|4.27|-0.2|4.47	0	.
chr14	122263999	122269599	DB_Ctrl_dev_H3K27me3_P39_vs_E14_up_5820|5.78|3.97|1.81	0	.
chr1	6540399	6545799	DB_Ctrl_dev_H3K27me3_P39_vs_E14_up_5821|5.84|4.27|1.58	0	.
chr13	31075599	31086799	DB_Ctrl_dev_H3K27me3_P39_vs_E14_up_5822|7.13|6.12|1.01	0	.
chr11	48592399	48595599	DB_Ctrl_dev_H3K27me3_P39_vs_E14_up_5823|4.34|0.33|4.01	0	.
chr8	114104599	114110199	DB_Ctrl_dev_H3K27me3_P39_vs_E14_up_5824|5.69|3.83|1.86	0	.
chr1	140097999	140102999	DB_Ctrl_dev_H3K27me3_P39_vs_E14_up_5826|5.03|2.43|2.6	0	.
chr7	129096799	129102199	DB_Ctrl_dev_H3K27me3_P39_vs_E14_up_5827|5.77|4.14|1.62	0	.
chr3	121501399	121505199	DB_Ctrl_dev_H3K27me3_P39_vs_E14_up_5829|4.71|1.58|3.13	0	.
chr11	101485199	101491599	DB_Ctrl_dev_H3K27me3_P39_vs_E14_up_5830|5.88|4.23|1.65	0	.
chr16	88631799	88635599	DB_Ctrl_dev_H3K27me3_P39_vs_E14_up_5831|5.03|2.28|2.75	0	.
chr2	117547399	117548999	DB_Ctrl_dev_H3K27me3_P39_vs_E14_up_5834|4.6|1.2|3.4	0	.
chr18	48896599	48899799	DB_Ctrl_dev_H3K27me3_P39_vs_E14_up_5836|4.91|2.03|2.89	0	.
chr3	37227599	37230199	DB_Ctrl_dev_H3K27me3_P39_vs_E14_up_5838|4.48|0.87|3.61	0	.
chr1	139374399	139376599	DB_Ctrl_dev_H3K27me3_P39_vs_E14_up_5840|4.31|-0.2|4.52	0	.
chr2	58005599	58008999	DB_Ctrl_dev_H3K27me3_P39_vs_E14_up_5841|4.37|-0.2|4.57	0	.
chr1	6777399	6783799	DB_Ctrl_dev_H3K27me3_P39_vs_E14_up_5842|5.62|3.77|1.84	0	.
chr6	146107999	146109599	DB_Ctrl_dev_H3K27me3_P39_vs_E14_up_5844|4.57|1.03|3.54	0	.
chr2	60363599	60370599	DB_Ctrl_dev_H3K27me3_P39_vs_E14_up_5847|5.83|3.99|1.84	0	.
chr1	40492999	40495199	DB_Ctrl_dev_H3K27me3_P39_vs_E14_up_5849|4.34|0.33|4.01	0	.
chr4	135075599	135077599	DB_Ctrl_dev_H3K27me3_P39_vs_E14_up_5850|4.34|0.33|4.01	0	.
chr9	116555199	116558599	DB_Ctrl_dev_H3K27me3_P39_vs_E14_up_5851|5.05|2.23|2.83	0	.
chr2	158983799	158988199	DB_Ctrl_dev_H3K27me3_P39_vs_E14_up_5853|5.23|2.79|2.45	0	.
chr18	58629999	58638799	DB_Ctrl_dev_H3K27me3_P39_vs_E14_up_5854|6.53|5.23|1.3	0	.
chr11	18568999	18572799	DB_Ctrl_dev_H3K27me3_P39_vs_E14_up_5856|4.74|1.5|3.24	0	.
chr14	57196199	57198999	DB_Ctrl_dev_H3K27me3_P39_vs_E14_up_5857|4.44|0.72|3.72	0	.
chr3	50276399	50279799	DB_Ctrl_dev_H3K27me3_P39_vs_E14_up_5858|4.27|-0.2|4.47	0	.
chr14	104645399	104650199	DB_Ctrl_dev_H3K27me3_P39_vs_E14_up_5859|5.17|2.84|2.33	0	.
chr7	136798199	136806999	DB_Ctrl_dev_H3K27me3_P39_vs_E14_up_5860|5.96|4.31|1.65	0	.
chr11	88323199	88332799	DB_Ctrl_dev_H3K27me3_P39_vs_E14_up_5861|6.11|4.63|1.49	0	.
chr11	18849799	18857599	DB_Ctrl_dev_H3K27me3_P39_vs_E14_up_5862|6.03|4.54|1.49	0	.
chr2	22118399	22122199	DB_Ctrl_dev_H3K27me3_P39_vs_E14_up_5863|4.89|2.06|2.83	0	.
chr8	56893799	56898599	DB_Ctrl_dev_H3K27me3_P39_vs_E14_up_5868|4.74|1.66|3.08	0	.
chr13	58762599	58767599	DB_Ctrl_dev_H3K27me3_P39_vs_E14_up_5870|5.05|2.23|2.83	0	.
chr5	22327599	22332599	DB_Ctrl_dev_H3K27me3_P39_vs_E14_up_5871|5.55|3.74|1.82	0	.
chr1	190645999	190653599	DB_Ctrl_dev_H3K27me3_P39_vs_E14_up_5873|5.88|4.34|1.54	0	.
chr6	9080999	9085599	DB_Ctrl_dev_H3K27me3_P39_vs_E14_up_5875|4.94|2.19|2.75	0	.
chr1	188553799	188556799	DB_Ctrl_dev_H3K27me3_P39_vs_E14_up_5876|4.45|0.72|3.72	0	.
chr16	25259999	25263999	DB_Ctrl_dev_H3K27me3_P39_vs_E14_up_5877|4.45|0.72|3.72	0	.
chr4	109627799	109631599	DB_Ctrl_dev_H3K27me3_P39_vs_E14_up_5881|5.15|2.5|2.65	0	.
chr6	4376799	4381399	DB_Ctrl_dev_H3K27me3_P39_vs_E14_up_5882|5.48|3.21|2.27	0	.
chr12	105873999	105875599	DB_Ctrl_dev_H3K27me3_P39_vs_E14_up_5886|4.85|1.7|3.15	0	.
chr7	137746599	137750399	DB_Ctrl_dev_H3K27me3_P39_vs_E14_up_5887|4.82|1.69|3.13	0	.
chr2	137790799	137795999	DB_Ctrl_dev_H3K27me3_P39_vs_E14_up_5889|5.21|2.81|2.41	0	.
chr3	124448199	124452999	DB_Ctrl_dev_H3K27me3_P39_vs_E14_up_5891|4.89|1.85|3.04	0	.
chr10	120479599	120484999	DB_Ctrl_dev_H3K27me3_P39_vs_E14_up_5892|6.09|4.62|1.46	0	.
chr3	102606199	102610399	DB_Ctrl_dev_H3K27me3_P39_vs_E14_up_5894|4.89|2.15|2.75	0	.
chr1	190584599	190595399	DB_Ctrl_dev_H3K27me3_P39_vs_E14_up_5895|6.56|5.27|1.29	0	.
chr14	95778799	95782599	DB_Ctrl_dev_H3K27me3_P39_vs_E14_up_5899|4.45|0.72|3.72	0	.
chr4	72915999	72919399	DB_Ctrl_dev_H3K27me3_P39_vs_E14_up_5900|4.44|0.8|3.65	0	.
chr7	69768399	69773399	DB_Ctrl_dev_H3K27me3_P39_vs_E14_up_5902|5.11|2.26|2.85	0	.
chr3	15018999	15023199	DB_Ctrl_dev_H3K27me3_P39_vs_E14_up_5904|5.26|2.57|2.68	0	.
chr8	89200999	89204399	DB_Ctrl_dev_H3K27me3_P39_vs_E14_up_5905|5.38|3.12|2.25	0	.
chr7	135052199	135055799	DB_Ctrl_dev_H3K27me3_P39_vs_E14_up_5906|4.5|0.87|3.64	0	.
chr9	13636399	13644199	DB_Ctrl_dev_H3K27me3_P39_vs_E14_up_5907|5.95|4.33|1.62	0	.
chr1	62665999	62670999	DB_Ctrl_dev_H3K27me3_P39_vs_E14_up_5908|5.67|3.97|1.71	0	.
chr1	7457199	7459999	DB_Ctrl_dev_H3K27me3_P39_vs_E14_up_5909|4.44|0.72|3.72	0	.
chr14	34095399	34098799	DB_Ctrl_dev_H3K27me3_P39_vs_E14_up_5910|5.2|2.75|2.45	0	.
chr14	98105399	98111799	DB_Ctrl_dev_H3K27me3_P39_vs_E14_up_5912|5.95|4.35|1.6	0	.
chr12	59935199	59940999	DB_Ctrl_dev_H3K27me3_P39_vs_E14_up_5913|5.39|3.08|2.31	0	.
chr16	50546999	50556599	DB_Ctrl_dev_H3K27me3_P39_vs_E14_up_5914|6.19|4.8|1.39	0	.
chr11	45186599	45189999	DB_Ctrl_dev_H3K27me3_P39_vs_E14_up_5915|5.23|3.05|2.18	0	.
chr8	89802199	89805799	DB_Ctrl_dev_H3K27me3_P39_vs_E14_up_5919|4.31|-0.2|4.52	0	.
chr8	89765599	89776599	DB_Ctrl_dev_H3K27me3_P39_vs_E14_up_5920|6.79|5.59|1.2	0	.
chr10	87044599	87047999	DB_Ctrl_dev_H3K27me3_P39_vs_E14_up_5921|5.13|2.37|2.76	0	.
chr17	43530799	43535599	DB_Ctrl_dev_H3K27me3_P39_vs_E14_up_5926|5.99|4.26|1.73	0	.
chr3	84722799	84726199	DB_Ctrl_dev_H3K27me3_P39_vs_E14_up_5928|5.25|3.01|2.24	0	.
chr5	58178799	58184199	DB_Ctrl_dev_H3K27me3_P39_vs_E14_up_5929|5.23|2.57|2.66	0	.
chr11	82344199	82350399	DB_Ctrl_dev_H3K27me3_P39_vs_E14_up_5930|5.74|4.07|1.67	0	.
chr5	69545199	69547999	DB_Ctrl_dev_H3K27me3_P39_vs_E14_up_5932|4.6|1.2|3.4	0	.
chr11	18238799	18242399	DB_Ctrl_dev_H3K27me3_P39_vs_E14_up_5936|4.27|-0.2|4.48	0	.
chr2	105274399	105282599	DB_Ctrl_dev_H3K27me3_P39_vs_E14_up_5938|6.16|4.67|1.48	0	.
chr3	38144799	38151799	DB_Ctrl_dev_H3K27me3_P39_vs_E14_up_5939|5.77|4.02|1.75	0	.
chr9	5972399	5975399	DB_Ctrl_dev_H3K27me3_P39_vs_E14_up_5943|4.54|1.03|3.51	0	.
chr12	53433999	53437199	DB_Ctrl_dev_H3K27me3_P39_vs_E14_up_5944|4.45|0.72|3.72	0	.
chr8	35004399	35008999	DB_Ctrl_dev_H3K27me3_P39_vs_E14_up_5945|5.5|3.53|1.97	0	.
chr8	48150999	48154999	DB_Ctrl_dev_H3K27me3_P39_vs_E14_up_5949|6.01|4.53|1.47	0	.
chr5	127407199	127409999	DB_Ctrl_dev_H3K27me3_P39_vs_E14_up_5951|5.19|2.81|2.39	0	.
chr3	76342599	76345199	DB_Ctrl_dev_H3K27me3_P39_vs_E14_up_5954|4.44|0.72|3.72	0	.
chr9	116961599	116970799	DB_Ctrl_dev_H3K27me3_P39_vs_E14_up_5955|6.62|5.43|1.18	0	.
chr9	84549599	84556399	DB_Ctrl_dev_H3K27me3_P39_vs_E14_up_5956|5.39|2.83|2.56	0	.
chr8	107748399	107752999	DB_Ctrl_dev_H3K27me3_P39_vs_E14_up_5958|4.54|1.03|3.51	0	.
chr2	10927799	10932199	DB_Ctrl_dev_H3K27me3_P39_vs_E14_up_5960|5.64|3.89|1.76	0	.
chr12	118125199	118129399	DB_Ctrl_dev_H3K27me3_P39_vs_E14_up_5962|5.14|2.61|2.52	0	.
chr2	13752999	13755399	DB_Ctrl_dev_H3K27me3_P39_vs_E14_up_5963|4.63|1.38|3.25	0	.
chr2	22643999	22647599	DB_Ctrl_dev_H3K27me3_P39_vs_E14_up_5964|5.43|3.45|1.98	0	.
chr2	118235799	118239599	DB_Ctrl_dev_H3K27me3_P39_vs_E14_up_5965|4.89|1.85|3.04	0	.
chr15	85975799	85977599	DB_Ctrl_dev_H3K27me3_P39_vs_E14_up_5966|4.23|-0.2|4.44	0	.
chr18	88000399	88003599	DB_Ctrl_dev_H3K27me3_P39_vs_E14_up_5967|4.23|-0.2|4.44	0	.
chr2	51902999	51906399	DB_Ctrl_dev_H3K27me3_P39_vs_E14_up_5968|4.23|-0.2|4.44	0	.
chr8	64325599	64328799	DB_Ctrl_dev_H3K27me3_P39_vs_E14_up_5969|4.23|-0.2|4.44	0	.
chr4	19922999	19928399	DB_Ctrl_dev_H3K27me3_P39_vs_E14_up_5970|4.89|2.06|2.83	0	.
chr9	65155199	65158999	DB_Ctrl_dev_H3K27me3_P39_vs_E14_up_5971|5.48|3.56|1.91	0	.
chr3	91233599	91237799	DB_Ctrl_dev_H3K27me3_P39_vs_E14_up_5976|4.54|1.03|3.51	0	.
chr12	78104799	78116399	DB_Ctrl_dev_H3K27me3_P39_vs_E14_up_5977|6.46|5.22|1.24	0	.
chr8	57132999	57135799	DB_Ctrl_dev_H3K27me3_P39_vs_E14_up_5978|4.77|1.72|3.05	0	.
chr5	51232199	51236799	DB_Ctrl_dev_H3K27me3_P39_vs_E14_up_5980|5.49|3.64|1.85	0	.
chr4	94387199	94391199	DB_Ctrl_dev_H3K27me3_P39_vs_E14_up_5981|5.15|2.87|2.28	0	.
chr10	111801799	111804599	DB_Ctrl_dev_H3K27me3_P39_vs_E14_up_5982|4.82|1.98|2.84	0	.
chr11	38109399	38116799	DB_Ctrl_dev_H3K27me3_P39_vs_E14_up_5983|5.91|4.38|1.52	0	.
chr9	77436199	77439599	DB_Ctrl_dev_H3K27me3_P39_vs_E14_up_5984|4.96|2.38|2.58	0	.
chr10	44257399	44262799	DB_Ctrl_dev_H3K27me3_P39_vs_E14_up_5985|5.35|2.75|2.59	0	.
chr8	116296799	116299399	DB_Ctrl_dev_H3K27me3_P39_vs_E14_up_5986|4.23|-0.2|4.44	0	.
chr14	97985599	97988599	DB_Ctrl_dev_H3K27me3_P39_vs_E14_up_5990|4.23|-0.2|4.44	0	.
chr1	6774399	6775999	DB_Ctrl_dev_H3K27me3_P39_vs_E14_up_5991|4.45|0.72|3.73	0	.
chr4	12586399	12588799	DB_Ctrl_dev_H3K27me3_P39_vs_E14_up_5992|4.28|-0.2|4.48	0	.
chr12	53262399	53267599	DB_Ctrl_dev_H3K27me3_P39_vs_E14_up_5993|5.7|3.75|1.95	0	.
chr15	51671199	51677999	DB_Ctrl_dev_H3K27me3_P39_vs_E14_up_5994|5.99|4.49|1.5	0	.
chr7	40103799	40106999	DB_Ctrl_dev_H3K27me3_P39_vs_E14_up_5996|4.31|-0.2|4.52	0	.
chr16	92564799	92569199	DB_Ctrl_dev_H3K27me3_P39_vs_E14_up_5998|5.63|3.89|1.74	0	.
chr2	107871399	107875199	DB_Ctrl_dev_H3K27me3_P39_vs_E14_up_5999|4.69|1.54|3.15	0	.
chr19	49296599	49300199	DB_Ctrl_dev_H3K27me3_P39_vs_E14_up_6000|5.13|2.76|2.37	0	.
chr11	18490599	18495399	DB_Ctrl_dev_H3K27me3_P39_vs_E14_up_6003|5.33|3.11|2.22	0	.
chr5	102435599	102438799	DB_Ctrl_dev_H3K27me3_P39_vs_E14_up_6004|4.89|1.9|2.99	0	.
chr1	112284199	112285999	DB_Ctrl_dev_H3K27me3_P39_vs_E14_up_6006|4.24|-0.2|4.44	0	.
chr14	104899599	104901599	DB_Ctrl_dev_H3K27me3_P39_vs_E14_up_6007|4.24|-0.2|4.44	0	.
chr3	151891399	151893599	DB_Ctrl_dev_H3K27me3_P39_vs_E14_up_6008|4.54|1.09|3.46	0	.
chr5	47171599	47173799	DB_Ctrl_dev_H3K27me3_P39_vs_E14_up_6009|4.27|-0.2|4.47	0	.
chr9	116103799	116107399	DB_Ctrl_dev_H3K27me3_P39_vs_E14_up_6010|5.36|3.34|2.02	0	.
chr3	120857599	120860199	DB_Ctrl_dev_H3K27me3_P39_vs_E14_up_6017|4.31|0.33|3.97	0	.
chr4	156331599	156335599	DB_Ctrl_dev_H3K27me3_P39_vs_E14_up_6019|5.52|3.67|1.85	0	.
chr15	45981999	45984599	DB_Ctrl_dev_H3K27me3_P39_vs_E14_up_6020|4.23|-0.2|4.44	0	.
chr16	88351199	88352999	DB_Ctrl_dev_H3K27me3_P39_vs_E14_up_6021|4.23|-0.2|4.44	0	.
chr17	4300199	4302199	DB_Ctrl_dev_H3K27me3_P39_vs_E14_up_6022|4.23|-0.2|4.44	0	.
chr11	40301799	40305799	DB_Ctrl_dev_H3K27me3_P39_vs_E14_up_6023|4.6|1.33|3.27	0	.
chr12	53331799	53339799	DB_Ctrl_dev_H3K27me3_P39_vs_E14_up_6024|5.9|4.39|1.52	0	.
chr13	111795599	111805799	DB_Ctrl_dev_H3K27me3_P39_vs_E14_up_6026|6.73|5.65|1.08	0	.
chr13	111963999	111973399	DB_Ctrl_dev_H3K27me3_P39_vs_E14_up_6028|6.39|5.14|1.25	0	.
chr3	66934399	66945999	DB_Ctrl_dev_H3K27me3_P39_vs_E14_up_6030|6.2|4.74|1.45	0	.
chr12	53872599	53874799	DB_Ctrl_dev_H3K27me3_P39_vs_E14_up_6031|4.63|1.28|3.35	0	.
chr16	64148399	64150999	DB_Ctrl_dev_H3K27me3_P39_vs_E14_up_6032|4.31|0.33|3.97	0	.
chr15	60480799	60483399	DB_Ctrl_dev_H3K27me3_P39_vs_E14_up_6037|4.31|0.33|3.97	0	.
chr6	145071599	145074799	DB_Ctrl_dev_H3K27me3_P39_vs_E14_up_6038|4.96|2.36|2.6	0	.
chr1	91602799	91609599	DB_Ctrl_dev_H3K27me3_P39_vs_E14_up_6039|6.05|4.62|1.44	0	.
chr7	86774599	86778199	DB_Ctrl_dev_H3K27me3_P39_vs_E14_up_6040|5.32|3.19|2.13	0	.
chr3	35077799	35081399	DB_Ctrl_dev_H3K27me3_P39_vs_E14_up_6041|5.29|3.19|2.1	0	.
chr5	132871199	132874399	DB_Ctrl_dev_H3K27me3_P39_vs_E14_up_6042|4.24|-0.2|4.44	0	.
chr14	51940199	51949399	DB_Ctrl_dev_H3K27me3_P39_vs_E14_up_6044|6.11|4.61|1.49	0	.
chr18	14017199	14021799	DB_Ctrl_dev_H3K27me3_P39_vs_E14_up_6048|5.41|2.91|2.5	0	.
chr12	47251999	47257999	DB_Ctrl_dev_H3K27me3_P39_vs_E14_up_6049|5.79|4.19|1.6	0	.
chr10	12186799	12190599	DB_Ctrl_dev_H3K27me3_P39_vs_E14_up_6050|5.01|2.13|2.88	0	.
chr6	145478399	145480799	DB_Ctrl_dev_H3K27me3_P39_vs_E14_up_6051|4.45|0.72|3.73	0	.
chr12	16109399	16113199	DB_Ctrl_dev_H3K27me3_P39_vs_E14_up_6054|4.63|1.38|3.24	0	.
chr1	5774599	5777599	DB_Ctrl_dev_H3K27me3_P39_vs_E14_up_6055|4.23|-0.2|4.43	0	.
chr11	82101599	82104599	DB_Ctrl_dev_H3K27me3_P39_vs_E14_up_6059|4.69|1.62|3.06	0	.
chr6	15253599	15258799	DB_Ctrl_dev_H3K27me3_P39_vs_E14_up_6060|5.36|3.29|2.07	0	.
chr1	80697399	80700199	DB_Ctrl_dev_H3K27me3_P39_vs_E14_up_6062|4.54|1.03|3.51	0	.
chr17	31705399	31706999	DB_Ctrl_dev_H3K27me3_P39_vs_E14_up_6064|4.63|1.28|3.35	0	.
chr15	50923999	50929799	DB_Ctrl_dev_H3K27me3_P39_vs_E14_up_6065|5.67|3.99|1.68	0	.
chr9	73370599	73374199	DB_Ctrl_dev_H3K27me3_P39_vs_E14_up_6066|4.74|1.8|2.94	0	.
chr12	53944799	53949599	DB_Ctrl_dev_H3K27me3_P39_vs_E14_up_6067|5.49|3.54|1.95	0	.
chr4	66410399	66414999	DB_Ctrl_dev_H3K27me3_P39_vs_E14_up_6071|5.38|3.39|1.99	0	.
chr9	47126599	47131999	DB_Ctrl_dev_H3K27me3_P39_vs_E14_up_6076|5.45|3.3|2.15	0	.
chr15	88020599	88028599	DB_Ctrl_dev_H3K27me3_P39_vs_E14_up_6077|5.47|3.16|2.3	0	.
chr18	14002199	14011799	DB_Ctrl_dev_H3K27me3_P39_vs_E14_up_6079|6.1|4.41|1.7	0	.
chr2	137480999	137484999	DB_Ctrl_dev_H3K27me3_P39_vs_E14_up_6082|4.57|1.03|3.54	0	.
chr12	90928999	90931999	DB_Ctrl_dev_H3K27me3_P39_vs_E14_up_6083|5.27|3.12|2.15	0	.
chr9	87555999	87559799	DB_Ctrl_dev_H3K27me3_P39_vs_E14_up_6086|5.01|2.49|2.52	0	.
chr8	44837599	44841999	DB_Ctrl_dev_H3K27me3_P39_vs_E14_up_6088|5.37|3.01|2.36	0	.
chr14	118448199	118454199	DB_Ctrl_dev_H3K27me3_P39_vs_E14_up_6089|5.41|3.49|1.93	0	.
chr14	30584799	30588399	DB_Ctrl_dev_H3K27me3_P39_vs_E14_up_6091|4.96|2.07|2.89	0	.
chr10	126367399	126370799	DB_Ctrl_dev_H3K27me3_P39_vs_E14_up_6092|5.38|2.75|2.63	0	.
chr2	118638999	118641599	DB_Ctrl_dev_H3K27me3_P39_vs_E14_up_6095|4.31|0.43|3.88	0	.
chr2	179399599	179401199	DB_Ctrl_dev_H3K27me3_P39_vs_E14_up_6096|4.31|0.43|3.88	0	.
chr3	84746399	84750599	DB_Ctrl_dev_H3K27me3_P39_vs_E14_up_6098|5.71|3.89|1.82	0	.
chr13	48286799	48293999	DB_Ctrl_dev_H3K27me3_P39_vs_E14_up_6100|6.43|5.2|1.23	0	.
chr6	95585799	95591799	DB_Ctrl_dev_H3K27me3_P39_vs_E14_up_6101|5.46|3.57|1.89	0	.
chr2	39499399	39501799	DB_Ctrl_dev_H3K27me3_P39_vs_E14_up_6102|4.82|1.87|2.95	0	.
chr10	39595599	39601399	DB_Ctrl_dev_H3K27me3_P39_vs_E14_up_6104|5.86|4.09|1.77	0	.
chr5	90902599	90907199	DB_Ctrl_dev_H3K27me3_P39_vs_E14_up_6105|6.09|4.58|1.51	0	.
chr13	30509999	30512799	DB_Ctrl_dev_H3K27me3_P39_vs_E14_up_6107|4.44|0.87|3.58	0	.
chr9	117192799	117196599	DB_Ctrl_dev_H3K27me3_P39_vs_E14_up_6108|5.25|3.01|2.24	0	.
chr10	120515399	120517199	DB_Ctrl_dev_H3K27me3_P39_vs_E14_up_6109|4.3|0.33|3.97	0	.
chr4	72626999	72628399	DB_Ctrl_dev_H3K27me3_P39_vs_E14_up_6110|4.3|0.33|3.97	0	.
chr3	30253599	30259599	DB_Ctrl_dev_H3K27me3_P39_vs_E14_up_6112|6.14|4.75|1.39	0	.
chr4	135217599	135224399	DB_Ctrl_dev_H3K27me3_P39_vs_E14_up_6115|5.49|3.61|1.88	0	.
chr1	67559999	67563999	DB_Ctrl_dev_H3K27me3_P39_vs_E14_up_6116|4.89|2.03|2.86	0	.
chr11	63523599	63527999	DB_Ctrl_dev_H3K27me3_P39_vs_E14_up_6118|5.48|3.52|1.96	0	.
chr16	3631599	3638199	DB_Ctrl_dev_H3K27me3_P39_vs_E14_up_6119|5.9|4.14|1.76	0	.
chr19	16840599	16841999	DB_Ctrl_dev_H3K27me3_P39_vs_E14_up_6120|4.31|0.43|3.88	0	.
chr10	125568999	125573799	DB_Ctrl_dev_H3K27me3_P39_vs_E14_up_6128|5.45|3.43|2.02	0	.
chr18	68538399	68543799	DB_Ctrl_dev_H3K27me3_P39_vs_E14_up_6131|5.69|4.03|1.66	0	.
chr5	102314799	102318599	DB_Ctrl_dev_H3K27me3_P39_vs_E14_up_6134|5.39|3.45|1.95	0	.
chr1	52075799	52081199	DB_Ctrl_dev_H3K27me3_P39_vs_E14_up_6135|5.71|3.89|1.82	0	.
chr3	75944599	75946399	DB_Ctrl_dev_H3K27me3_P39_vs_E14_up_6138|4.34|0.33|4	0	.
chr6	145730399	145736799	DB_Ctrl_dev_H3K27me3_P39_vs_E14_up_6139|6.01|4.55|1.46	0	.
chr18	74692399	74695399	DB_Ctrl_dev_H3K27me3_P39_vs_E14_up_6141|4.2|-0.2|4.4	0	.
[truncated: 4,775 more rows]

## Sheet: E14 > P39
chrom	start	end	name (id|log2_P39|log2_E14|log2_diff)	score	strand
chr15	98767599	98811399	DB_Ctrl_dev_H3K27me3_P39_vs_E14_down_2|7.89|10.65|-2.76	0	.
chr12	117143599	117182599	DB_Ctrl_dev_H3K27me3_P39_vs_E14_down_3|4.34|9.56|-5.22	0	.
chr8	105252399	105280199	DB_Ctrl_dev_H3K27me3_P39_vs_E14_down_4|5.29|9.5|-4.21	0	.
chr1	74759799	74813999	DB_Ctrl_dev_H3K27me3_P39_vs_E14_down_5|7.76|10.44|-2.68	0	.
chr4	131909999	131928999	DB_Ctrl_dev_H3K27me3_P39_vs_E14_down_6|5.75|9.11|-3.36	0	.
chr15	79498799	79519999	DB_Ctrl_dev_H3K27me3_P39_vs_E14_down_7|4.72|8.9|-4.18	0	.
chr11	35525599	35583799	DB_Ctrl_dev_H3K27me3_P39_vs_E14_down_8|6.96|9.62|-2.66	0	.
chr4	152113999	152134799	DB_Ctrl_dev_H3K27me3_P39_vs_E14_down_9|7.48|9.77|-2.29	0	.
chr7	27321199	27338799	DB_Ctrl_dev_H3K27me3_P39_vs_E14_down_10|4.34|8.66|-4.31	0	.
chr11	75162199	75174799	DB_Ctrl_dev_H3K27me3_P39_vs_E14_down_11|5.5|8.83|-3.33	0	.
chr9	45128399	45151799	DB_Ctrl_dev_H3K27me3_P39_vs_E14_down_12|6.11|8.97|-2.86	0	.
chr17	44726599	44742599	DB_Ctrl_dev_H3K27me3_P39_vs_E14_down_13|4.38|8.52|-4.14	0	.
chr19	5065199	5087999	DB_Ctrl_dev_H3K27me3_P39_vs_E14_down_14|4.23|8.44|-4.21	0	.
chr15	101041999	101056599	DB_Ctrl_dev_H3K27me3_P39_vs_E14_down_15|5.38|8.62|-3.25	0	.
chr6	118467199	118488799	DB_Ctrl_dev_H3K27me3_P39_vs_E14_down_16|4.74|8.51|-3.78	0	.
chr5	31085799	31101999	DB_Ctrl_dev_H3K27me3_P39_vs_E14_down_17|5.89|8.77|-2.87	0	.
chr2	33558599	33592199	DB_Ctrl_dev_H3K27me3_P39_vs_E14_down_18|7.18|9.4|-2.22	0	.
chr9	122565999	122577399	DB_Ctrl_dev_H3K27me3_P39_vs_E14_down_19|3.51|8.34|-4.83	0	.
chr11	76661799	76678799	DB_Ctrl_dev_H3K27me3_P39_vs_E14_down_20|4.6|8.4|-3.8	0	.
chr13	63563799	63579799	DB_Ctrl_dev_H3K27me3_P39_vs_E14_down_21|4.94|8.39|-3.45	0	.
chr2	144326399	144337599	DB_Ctrl_dev_H3K27me3_P39_vs_E14_down_22|5.17|8.43|-3.25	0	.
chr10	67522999	67548399	DB_Ctrl_dev_H3K27me3_P39_vs_E14_down_23|6.19|8.96|-2.77	0	.
chr7	81447199	81460999	DB_Ctrl_dev_H3K27me3_P39_vs_E14_down_24|2.99|8.28|-5.3	0	.
chr11	97622999	97632199	DB_Ctrl_dev_H3K27me3_P39_vs_E14_down_25|3.68|8.18|-4.5	0	.
chr4	48045399	48056999	DB_Ctrl_dev_H3K27me3_P39_vs_E14_down_26|3.44|8.15|-4.7	0	.
chr14	34812799	34824799	DB_Ctrl_dev_H3K27me3_P39_vs_E14_down_27|4.44|8.17|-3.73	0	.
chr5	135855599	135871599	DB_Ctrl_dev_H3K27me3_P39_vs_E14_down_28|1.97|8.7|-6.73	0	.
chr4	152279399	152296999	DB_Ctrl_dev_H3K27me3_P39_vs_E14_down_29|6.49|8.88|-2.4	0	.
chr2	118699199	118712199	DB_Ctrl_dev_H3K27me3_P39_vs_E14_down_30|5.66|8.5|-2.84	0	.
chr5	118158399	118176999	DB_Ctrl_dev_H3K27me3_P39_vs_E14_down_31|5.29|8.36|-3.08	0	.
chr8	125904599	125917399	DB_Ctrl_dev_H3K27me3_P39_vs_E14_down_33|4.38|8.1|-3.73	0	.
chr13	78167599	78199599	DB_Ctrl_dev_H3K27me3_P39_vs_E14_down_34|7.17|9.2|-2.03	0	.
chr2	164164999	164177999	DB_Ctrl_dev_H3K27me3_P39_vs_E14_down_35|4.76|8.19|-3.43	0	.
chr11	103352999	103367999	DB_Ctrl_dev_H3K27me3_P39_vs_E14_down_36|5.56|8.38|-2.83	0	.
chr10	80340199	80361399	DB_Ctrl_dev_H3K27me3_P39_vs_E14_down_37|7.61|9.44|-1.83	0	.
chr5	28450399	28473199	DB_Ctrl_dev_H3K27me3_P39_vs_E14_down_38|7.03|9.07|-2.04	0	.
chr8	69876599	69891399	DB_Ctrl_dev_H3K27me3_P39_vs_E14_down_39|7.38|9.35|-1.98	0	.
chr19	37680799	37708199	DB_Ctrl_dev_H3K27me3_P39_vs_E14_down_40|7.71|9.52|-1.81	0	.
chr1	56975399	56989599	DB_Ctrl_dev_H3K27me3_P39_vs_E14_down_41|4.62|8.18|-3.56	0	.
chr2	31477399	31508199	DB_Ctrl_dev_H3K27me3_P39_vs_E14_down_42|6.93|9.03|-2.1	0	.
chr2	94236799	94249399	DB_Ctrl_dev_H3K27me3_P39_vs_E14_down_43|4.41|8.07|-3.66	0	.
chr8	71675599	71705799	DB_Ctrl_dev_H3K27me3_P39_vs_E14_down_44|8.49|10.03|-1.54	0	.
chr12	111267599	111279599	DB_Ctrl_dev_H3K27me3_P39_vs_E14_down_45|5.77|8.43|-2.66	0	.
chr9	111308399	111317399	DB_Ctrl_dev_H3K27me3_P39_vs_E14_down_46|4.23|7.97|-3.74	0	.
chr11	93095399	93107799	DB_Ctrl_dev_H3K27me3_P39_vs_E14_down_47|2.68|8.01|-5.33	0	.
chr7	35113399	35124199	DB_Ctrl_dev_H3K27me3_P39_vs_E14_down_48|4.87|8.11|-3.24	0	.
chr15	31363999	31372799	DB_Ctrl_dev_H3K27me3_P39_vs_E14_down_49|2.68|7.99|-5.3	0	.
chr15	11900599	11909599	DB_Ctrl_dev_H3K27me3_P39_vs_E14_down_50|3.89|7.9|-4	0	.
chr7	27400399	27409999	DB_Ctrl_dev_H3K27me3_P39_vs_E14_down_51|2.44|8.05|-5.61	0	.
chr13	55371999	55389999	DB_Ctrl_dev_H3K27me3_P39_vs_E14_down_52|4.03|7.94|-3.9	0	.
chr15	72538999	72549799	DB_Ctrl_dev_H3K27me3_P39_vs_E14_down_53|4.68|8.04|-3.35	0	.
chr2	165229599	165257399	DB_Ctrl_dev_H3K27me3_P39_vs_E14_down_54|7.21|9.11|-1.9	0	.
chr9	102236399	102272199	DB_Ctrl_dev_H3K27me3_P39_vs_E14_down_55|6.35|8.73|-2.37	0	.
chr19	54044599	54051199	DB_Ctrl_dev_H3K27me3_P39_vs_E14_down_56|3.3|7.8|-4.5	0	.
chr4	150025599	150037399	DB_Ctrl_dev_H3K27me3_P39_vs_E14_down_57|5.54|8.26|-2.72	0	.
chr9	47880999	47918599	DB_Ctrl_dev_H3K27me3_P39_vs_E14_down_58|7.01|9|-1.99	0	.
chr11	95822799	95838599	DB_Ctrl_dev_H3K27me3_P39_vs_E14_down_59|6.58|8.73|-2.15	0	.
chr10	81450399	81465599	DB_Ctrl_dev_H3K27me3_P39_vs_E14_down_60|5.51|8.27|-2.76	0	.
chr16	20587999	20594599	DB_Ctrl_dev_H3K27me3_P39_vs_E14_down_61|3.23|7.79|-4.56	0	.
chr18	7000199	7009399	DB_Ctrl_dev_H3K27me3_P39_vs_E14_down_62|4.54|7.93|-3.39	0	.
chr6	87729199	87740799	DB_Ctrl_dev_H3K27me3_P39_vs_E14_down_63|4.19|7.83|-3.64	0	.
chr19	10451999	10465799	DB_Ctrl_dev_H3K27me3_P39_vs_E14_down_64|5.21|8.15|-2.94	0	.
chr11	101161399	101171399	DB_Ctrl_dev_H3K27me3_P39_vs_E14_down_65|4.99|8.03|-3.04	0	.
chr2	109925599	109960199	DB_Ctrl_dev_H3K27me3_P39_vs_E14_down_66|6.77|8.84|-2.07	0	.
chr11	35440399	35473599	DB_Ctrl_dev_H3K27me3_P39_vs_E14_down_67|6.63|8.8|-2.16	0	.
chr5	137013599	137036599	DB_Ctrl_dev_H3K27me3_P39_vs_E14_down_68|6.39|8.6|-2.21	0	.
chr17	56111599	56126999	DB_Ctrl_dev_H3K27me3_P39_vs_E14_down_69|4.94|8.08|-3.14	0	.
chr1	89691599	89716599	DB_Ctrl_dev_H3K27me3_P39_vs_E14_down_70|5.51|8.21|-2.7	0	.
chr14	58069399	58079199	DB_Ctrl_dev_H3K27me3_P39_vs_E14_down_71|2.3|7.9|-5.59	0	.
chr5	128587599	128614199	DB_Ctrl_dev_H3K27me3_P39_vs_E14_down_72|7.24|9.11|-1.86	0	.
chr9	21956599	21968999	DB_Ctrl_dev_H3K27me3_P39_vs_E14_down_73|3.89|7.75|-3.86	0	.
chr2	60868199	60886999	DB_Ctrl_dev_H3K27me3_P39_vs_E14_down_74|5.48|8.39|-2.91	0	.
chr7	143320999	143388799	DB_Ctrl_dev_H3K27me3_P39_vs_E14_down_75|8.35|9.82|-1.46	0	.
chr6	89015999	89043399	DB_Ctrl_dev_H3K27me3_P39_vs_E14_down_76|6.25|8.53|-2.28	0	.
chr11	75187599	75197199	DB_Ctrl_dev_H3K27me3_P39_vs_E14_down_77|4.19|7.78|-3.59	0	.
chr15	79037599	79048399	DB_Ctrl_dev_H3K27me3_P39_vs_E14_down_78|3.57|7.7|-4.13	0	.
chr11	70210399	70219199	DB_Ctrl_dev_H3K27me3_P39_vs_E14_down_79|3.44|7.72|-4.28	0	.
chr5	118024999	118030199	DB_Ctrl_dev_H3K27me3_P39_vs_E14_down_80|2.69|7.76|-5.07	0	.
chr4	46989199	47000199	DB_Ctrl_dev_H3K27me3_P39_vs_E14_down_81|3.31|7.68|-4.37	0	.
chr3	86537399	86563199	DB_Ctrl_dev_H3K27me3_P39_vs_E14_down_82|6.92|8.87|-1.94	0	.
chr8	70476399	70503599	DB_Ctrl_dev_H3K27me3_P39_vs_E14_down_83|7.72|9.67|-1.94	0	.
chr4	137272599	137280999	DB_Ctrl_dev_H3K27me3_P39_vs_E14_down_84|2.9|7.68|-4.78	0	.
chr11	74602799	74623599	DB_Ctrl_dev_H3K27me3_P39_vs_E14_down_85|6.16|8.6|-2.44	0	.
chr8	70735399	70751199	DB_Ctrl_dev_H3K27me3_P39_vs_E14_down_86|4.79|7.91|-3.11	0	.
chr11	84741999	84803399	DB_Ctrl_dev_H3K27me3_P39_vs_E14_down_87|8.19|9.67|-1.48	0	.
chr14	70071799	70089399	DB_Ctrl_dev_H3K27me3_P39_vs_E14_down_88|0.99|8.75|-7.75	0	.
chr18	38206599	38221599	DB_Ctrl_dev_H3K27me3_P39_vs_E14_down_90|1.79|7.99|-6.2	0	.
chr10	80926799	80941599	DB_Ctrl_dev_H3K27me3_P39_vs_E14_down_91|4.98|7.94|-2.95	0	.
chr7	19514199	19526199	DB_Ctrl_dev_H3K27me3_P39_vs_E14_down_92|5.35|8.15|-2.8	0	.
chr14	70633599	70644799	DB_Ctrl_dev_H3K27me3_P39_vs_E14_down_93|4.41|7.77|-3.35	0	.
chr10	81122599	81136399	DB_Ctrl_dev_H3K27me3_P39_vs_E14_down_94|1.58|8.1|-6.52	0	.
chr4	116013199	116026399	DB_Ctrl_dev_H3K27me3_P39_vs_E14_down_95|3.44|7.64|-4.2	0	.
chr7	45405199	45421599	DB_Ctrl_dev_H3K27me3_P39_vs_E14_down_96|7.26|9.09|-1.82	0	.
chr10	80805999	80817599	DB_Ctrl_dev_H3K27me3_P39_vs_E14_down_97|3.57|7.61|-4.04	0	.
chr18	80702999	80721599	DB_Ctrl_dev_H3K27me3_P39_vs_E14_down_98|7.46|9.13|-1.68	0	.
chr9	114555999	114568199	DB_Ctrl_dev_H3K27me3_P39_vs_E14_down_99|6.21|8.42|-2.21	0	.
chr8	72315599	72328799	DB_Ctrl_dev_H3K27me3_P39_vs_E14_down_101|5.05|7.94|-2.89	0	.
chr8	76896599	76907199	DB_Ctrl_dev_H3K27me3_P39_vs_E14_down_102|4.51|7.75|-3.24	0	.
chr7	138932799	138948599	DB_Ctrl_dev_H3K27me3_P39_vs_E14_down_103|3.8|7.63|-3.83	0	.
chr4	139087199	139096399	DB_Ctrl_dev_H3K27me3_P39_vs_E14_down_104|3.37|7.56|-4.19	0	.
chr12	86981799	86998399	DB_Ctrl_dev_H3K27me3_P39_vs_E14_down_105|5.12|7.97|-2.86	0	.
chr2	180093199	180109399	DB_Ctrl_dev_H3K27me3_P39_vs_E14_down_106|5.4|8.06|-2.67	0	.
chr7	30451599	30471599	DB_Ctrl_dev_H3K27me3_P39_vs_E14_down_107|7.48|9.18|-1.71	0	.
chr11	68378399	68407799	DB_Ctrl_dev_H3K27me3_P39_vs_E14_down_108|7.88|9.46|-1.58	0	.
chr4	152308599	152319199	DB_Ctrl_dev_H3K27me3_P39_vs_E14_down_109|5.63|8.15|-2.52	0	.
chr9	56739399	56761999	DB_Ctrl_dev_H3K27me3_P39_vs_E14_down_110|1.56|8|-6.44	0	.
chr5	32128399	32139199	DB_Ctrl_dev_H3K27me3_P39_vs_E14_down_112|3.69|7.58|-3.89	0	.
chr4	115923399	115986999	DB_Ctrl_dev_H3K27me3_P39_vs_E14_down_113|9.42|10.73|-1.32	0	.
chr13	78201999	78213999	DB_Ctrl_dev_H3K27me3_P39_vs_E14_down_114|3.84|7.66|-3.82	0	.
chr2	130569599	130584799	DB_Ctrl_dev_H3K27me3_P39_vs_E14_down_115|6.51|8.54|-2.03	0	.
chr1	74874199	74910799	DB_Ctrl_dev_H3K27me3_P39_vs_E14_down_116|8.38|9.78|-1.4	0	.
chr11	98344999	98356199	DB_Ctrl_dev_H3K27me3_P39_vs_E14_down_117|3.74|7.54|-3.8	0	.
chr4	130855599	130877999	DB_Ctrl_dev_H3K27me3_P39_vs_E14_down_119|5.6|8.09|-2.49	0	.
chr2	119751999	119765999	DB_Ctrl_dev_H3K27me3_P39_vs_E14_down_120|1.56|7.93|-6.37	0	.
chr17	27501199	27523799	DB_Ctrl_dev_H3K27me3_P39_vs_E14_down_121|6.39|8.46|-2.07	0	.
chr6	31214199	31227199	DB_Ctrl_dev_H3K27me3_P39_vs_E14_down_122|1.58|7.84|-6.26	0	.
chr5	33508399	33566399	DB_Ctrl_dev_H3K27me3_P39_vs_E14_down_123|8.71|9.97|-1.26	0	.
chr9	37525799	37533199	DB_Ctrl_dev_H3K27me3_P39_vs_E14_down_124|1.79|7.68|-5.89	0	.
chr8	122332999	122338799	DB_Ctrl_dev_H3K27me3_P39_vs_E14_down_125|3.44|7.43|-3.99	0	.
chr2	18686199	18707199	DB_Ctrl_dev_H3K27me3_P39_vs_E14_down_126|7.19|8.99|-1.8	0	.
chr8	122448599	122466199	DB_Ctrl_dev_H3K27me3_P39_vs_E14_down_127|4.52|7.81|-3.29	0	.
chr11	97438799	97447799	DB_Ctrl_dev_H3K27me3_P39_vs_E14_down_128|3.68|7.45|-3.77	0	.
chr5	128428799	128437199	DB_Ctrl_dev_H3K27me3_P39_vs_E14_down_129|2.68|7.43|-4.75	0	.
chr2	127478599	127486999	DB_Ctrl_dev_H3K27me3_P39_vs_E14_down_131|3.5|7.52|-4.02	0	.
chr11	114061199	114068599	DB_Ctrl_dev_H3K27me3_P39_vs_E14_down_132|3.15|7.41|-4.26	0	.
chr11	53461399	53469599	DB_Ctrl_dev_H3K27me3_P39_vs_E14_down_133|4.11|7.58|-3.47	0	.
chr1	75417599	75432399	DB_Ctrl_dev_H3K27me3_P39_vs_E14_down_134|0.99|8.22|-7.22	0	.
chr5	143286399	143294799	DB_Ctrl_dev_H3K27me3_P39_vs_E14_down_135|4.97|7.8|-2.84	0	.
chr18	65922799	65969399	DB_Ctrl_dev_H3K27me3_P39_vs_E14_down_136|8.59|9.87|-1.27	0	.
chr18	84081399	84096999	DB_Ctrl_dev_H3K27me3_P39_vs_E14_down_137|5.05|7.83|-2.77	0	.
chr1	88225199	88293199	DB_Ctrl_dev_H3K27me3_P39_vs_E14_down_138|9.29|10.72|-1.43	0	.
chr9	120299999	120309599	DB_Ctrl_dev_H3K27me3_P39_vs_E14_down_139|3.57|7.44|-3.87	0	.
chr9	48831599	48839999	DB_Ctrl_dev_H3K27me3_P39_vs_E14_down_140|2|7.56|-5.56	0	.
chr7	36688799	36697399	DB_Ctrl_dev_H3K27me3_P39_vs_E14_down_141|5.23|7.87|-2.64	0	.
chr7	19462799	19485799	DB_Ctrl_dev_H3K27me3_P39_vs_E14_down_142|6.35|8.51|-2.16	0	.
chr19	53672799	53681399	DB_Ctrl_dev_H3K27me3_P39_vs_E14_down_143|3.52|7.49|-3.97	0	.
chr6	52825199	52850199	DB_Ctrl_dev_H3K27me3_P39_vs_E14_down_144|5.09|7.83|-2.74	0	.
chr1	64970599	64987199	DB_Ctrl_dev_H3K27me3_P39_vs_E14_down_145|1.78|7.55|-5.77	0	.
chr2	148403999	148410599	DB_Ctrl_dev_H3K27me3_P39_vs_E14_down_146|4.07|7.54|-3.47	0	.
chr1	136255199	136264599	DB_Ctrl_dev_H3K27me3_P39_vs_E14_down_147|3.57|7.36|-3.79	0	.
chr15	73834199	73845599	DB_Ctrl_dev_H3K27me3_P39_vs_E14_down_148|3.62|7.43|-3.81	0	.
chr2	109670399	109678599	DB_Ctrl_dev_H3K27me3_P39_vs_E14_down_149|3.57|7.35|-3.78	0	.
chr11	59303599	59310799	DB_Ctrl_dev_H3K27me3_P39_vs_E14_down_150|1.56|7.61|-6.04	0	.
chr10	79603199	79615199	DB_Ctrl_dev_H3K27me3_P39_vs_E14_down_151|3.74|7.39|-3.65	0	.
chr10	81251199	81260999	DB_Ctrl_dev_H3K27me3_P39_vs_E14_down_152|1.8|7.52|-5.71	0	.
chr4	148159799	148167199	DB_Ctrl_dev_H3K27me3_P39_vs_E14_down_153|5.03|7.75|-2.72	0	.
chr15	75988799	76014399	DB_Ctrl_dev_H3K27me3_P39_vs_E14_down_154|7.88|9.32|-1.44	0	.
chr15	103164399	103186399	DB_Ctrl_dev_H3K27me3_P39_vs_E14_down_155|7.6|9.11|-1.51	0	.
chr4	148947199	148954199	DB_Ctrl_dev_H3K27me3_P39_vs_E14_down_156|4.99|7.72|-2.74	0	.
chr5	130441999	130453799	DB_Ctrl_dev_H3K27me3_P39_vs_E14_down_157|3.94|7.4|-3.46	0	.
chr7	44600799	44609799	DB_Ctrl_dev_H3K27me3_P39_vs_E14_down_158|4.79|7.65|-2.86	0	.
chr5	25095799	25105399	DB_Ctrl_dev_H3K27me3_P39_vs_E14_down_159|1.8|7.43|-5.63	0	.
chr7	19574399	19581199	DB_Ctrl_dev_H3K27me3_P39_vs_E14_down_160|3.84|7.35|-3.51	0	.
chr8	123109399	123131399	DB_Ctrl_dev_H3K27me3_P39_vs_E14_down_162|5.85|8.22|-2.37	0	.
chr16	17791799	17808199	DB_Ctrl_dev_H3K27me3_P39_vs_E14_down_163|7.57|9.05|-1.48	0	.
chr4	132069599	132080199	DB_Ctrl_dev_H3K27me3_P39_vs_E14_down_164|3.74|7.33|-3.59	0	.
chr5	37230399	37244999	DB_Ctrl_dev_H3K27me3_P39_vs_E14_down_165|1.32|7.65|-6.33	0	.
chr10	79776199	79788199	DB_Ctrl_dev_H3K27me3_P39_vs_E14_down_166|2.98|7.23|-4.25	0	.
chr13	92421199	92429199	DB_Ctrl_dev_H3K27me3_P39_vs_E14_down_167|4.19|7.45|-3.25	0	.
chr5	110538799	110554399	DB_Ctrl_dev_H3K27me3_P39_vs_E14_down_168|5.02|7.8|-2.77	0	.
chr2	109906999	109924199	DB_Ctrl_dev_H3K27me3_P39_vs_E14_down_169|5.1|7.74|-2.64	0	.
chr12	111436599	111460799	DB_Ctrl_dev_H3K27me3_P39_vs_E14_down_170|7.53|9.05|-1.52	0	.
chr13	96922599	96929399	DB_Ctrl_dev_H3K27me3_P39_vs_E14_down_171|3.07|7.19|-4.12	0	.
chr14	70883599	70894199	DB_Ctrl_dev_H3K27me3_P39_vs_E14_down_172|3.74|7.31|-3.57	0	.
chr4	133494199	133504599	DB_Ctrl_dev_H3K27me3_P39_vs_E14_down_173|5.25|7.81|-2.56	0	.
chr10	127165199	127173599	DB_Ctrl_dev_H3K27me3_P39_vs_E14_down_174|1.79|7.31|-5.52	0	.
chr11	98046599	98057199	DB_Ctrl_dev_H3K27me3_P39_vs_E14_down_175|4.02|7.48|-3.46	0	.
chr4	155391999	155401799	DB_Ctrl_dev_H3K27me3_P39_vs_E14_down_176|2.14|7.25|-5.1	0	.
chr4	107425599	107445399	DB_Ctrl_dev_H3K27me3_P39_vs_E14_down_177|6.21|8.24|-2.02	0	.
chr15	75737599	75750799	DB_Ctrl_dev_H3K27me3_P39_vs_E14_down_178|6.92|8.68|-1.76	0	.
chr10	80980999	80997399	DB_Ctrl_dev_H3K27me3_P39_vs_E14_down_179|2|7.26|-5.26	0	.
chr2	60787599	60810999	DB_Ctrl_dev_H3K27me3_P39_vs_E14_down_180|6.59|8.46|-1.87	0	.
chr18	67129799	67138999	DB_Ctrl_dev_H3K27me3_P39_vs_E14_down_182|3.63|7.24|-3.62	0	.
chr2	27560999	27580599	DB_Ctrl_dev_H3K27me3_P39_vs_E14_down_183|6.01|8.13|-2.12	0	.
chr12	55593399	55602399	DB_Ctrl_dev_H3K27me3_P39_vs_E14_down_186|5.54|7.97|-2.43	0	.
chr19	47249599	47258799	DB_Ctrl_dev_H3K27me3_P39_vs_E14_down_187|3.57|7.24|-3.66	0	.
chr7	57506399	57513199	DB_Ctrl_dev_H3K27me3_P39_vs_E14_down_188|4.31|7.41|-3.1	0	.
chr11	116526799	116534999	DB_Ctrl_dev_H3K27me3_P39_vs_E14_down_189|5.69|7.93|-2.25	0	.
chr4	133238599	133258199	DB_Ctrl_dev_H3K27me3_P39_vs_E14_down_190|6.42|8.31|-1.89	0	.
chr16	30305799	30312399	DB_Ctrl_dev_H3K27me3_P39_vs_E14_down_191|3.07|7.17|-4.1	0	.
chr4	155038199	155046599	DB_Ctrl_dev_H3K27me3_P39_vs_E14_down_192|3.84|7.27|-3.43	0	.
chr15	80664399	80676399	DB_Ctrl_dev_H3K27me3_P39_vs_E14_down_193|3.69|7.25|-3.56	0	.
chr5	146579799	146589999	DB_Ctrl_dev_H3K27me3_P39_vs_E14_down_194|3.23|7.16|-3.93	0	.
chr14	66633999	66639799	DB_Ctrl_dev_H3K27me3_P39_vs_E14_down_197|4.12|7.47|-3.35	0	.
chr16	18577799	18599199	DB_Ctrl_dev_H3K27me3_P39_vs_E14_down_198|8.09|9.49|-1.4	0	.
chr7	27361599	27381199	DB_Ctrl_dev_H3K27me3_P39_vs_E14_down_199|-0.01|9.03|-9.04	0	.
chr9	56792199	56801799	DB_Ctrl_dev_H3K27me3_P39_vs_E14_down_200|0.98|7.68|-6.7	0	.
chr4	123169799	123190399	DB_Ctrl_dev_H3K27me3_P39_vs_E14_down_201|5.48|7.82|-2.34	0	.
chr8	75202999	75217599	DB_Ctrl_dev_H3K27me3_P39_vs_E14_down_202|5.25|7.76|-2.51	0	.
chr7	49745799	49771199	DB_Ctrl_dev_H3K27me3_P39_vs_E14_down_203|6.23|8.28|-2.06	0	.
chr3	95169599	95175799	DB_Ctrl_dev_H3K27me3_P39_vs_E14_down_204|4.54|7.49|-2.95	0	.
chr7	19301599	19307999	DB_Ctrl_dev_H3K27me3_P39_vs_E14_down_206|4.2|7.47|-3.27	0	.
chr18	36062999	36074399	DB_Ctrl_dev_H3K27me3_P39_vs_E14_down_207|4.63|7.55|-2.92	0	.
chr7	131958399	131969599	DB_Ctrl_dev_H3K27me3_P39_vs_E14_down_208|1.99|7.15|-5.16	0	.
chr2	157910999	157920199	DB_Ctrl_dev_H3K27me3_P39_vs_E14_down_209|4.35|7.38|-3.04	0	.
chr5	73402999	73410599	DB_Ctrl_dev_H3K27me3_P39_vs_E14_down_210|2.14|7.13|-4.99	0	.
chr7	31033599	31046199	DB_Ctrl_dev_H3K27me3_P39_vs_E14_down_211|1.58|7.27|-5.69	0	.
chr4	120744399	120755199	DB_Ctrl_dev_H3K27me3_P39_vs_E14_down_212|5.73|7.92|-2.2	0	.
chr3	118429399	118437199	DB_Ctrl_dev_H3K27me3_P39_vs_E14_down_213|2.15|7.1|-4.95	0	.
chr12	109048999	109062199	DB_Ctrl_dev_H3K27me3_P39_vs_E14_down_214|6.06|8.08|-2.02	0	.
chr18	64655199	64663799	DB_Ctrl_dev_H3K27me3_P39_vs_E14_down_215|4.77|7.55|-2.78	0	.
chr8	123883199	123897399	DB_Ctrl_dev_H3K27me3_P39_vs_E14_down_216|0.57|7.99|-7.43	0	.
chr18	66003799	66041399	DB_Ctrl_dev_H3K27me3_P39_vs_E14_down_217|8.04|9.36|-1.31	0	.
chr19	11811399	11822599	DB_Ctrl_dev_H3K27me3_P39_vs_E14_down_218|1.32|7.36|-6.04	0	.
chr4	130300799	130312999	DB_Ctrl_dev_H3K27me3_P39_vs_E14_down_219|3.69|7.19|-3.5	0	.
chr9	119085199	119097799	DB_Ctrl_dev_H3K27me3_P39_vs_E14_down_220|4.38|7.35|-2.98	0	.
chr11	104129999	104140399	DB_Ctrl_dev_H3K27me3_P39_vs_E14_down_221|0.99|7.57|-6.58	0	.
chr1	91795599	91811799	DB_Ctrl_dev_H3K27me3_P39_vs_E14_down_222|6.15|8.15|-2	0	.
chr8	104168999	104176599	DB_Ctrl_dev_H3K27me3_P39_vs_E14_down_223|2.16|7.05|-4.9	0	.
chr2	29842599	29849199	DB_Ctrl_dev_H3K27me3_P39_vs_E14_down_224|4.11|7.31|-3.19	0	.
chr15	25486999	25512599	DB_Ctrl_dev_H3K27me3_P39_vs_E14_down_225|7.17|8.77|-1.59	0	.
chr15	64918399	64926199	DB_Ctrl_dev_H3K27me3_P39_vs_E14_down_226|1.32|7.33|-6.02	0	.
chr19	47011999	47022599	DB_Ctrl_dev_H3K27me3_P39_vs_E14_down_227|3.08|7.08|-4	0	.
chr3	104958599	104969199	DB_Ctrl_dev_H3K27me3_P39_vs_E14_down_228|6.16|8.13|-1.97	0	.
chr11	22854999	22866399	DB_Ctrl_dev_H3K27me3_P39_vs_E14_down_229|5.61|7.84|-2.22	0	.
chr15	76514599	76521799	DB_Ctrl_dev_H3K27me3_P39_vs_E14_down_230|0.98|7.54|-6.56	0	.
chr2	130631199	130639199	DB_Ctrl_dev_H3K27me3_P39_vs_E14_down_231|2.57|7.02|-4.46	0	.
chr7	16459999	16484999	DB_Ctrl_dev_H3K27me3_P39_vs_E14_down_232|7.29|8.83|-1.54	0	.
chr16	17818799	17839199	DB_Ctrl_dev_H3K27me3_P39_vs_E14_down_233|6.67|8.39|-1.72	0	.
chr16	11981599	11989399	DB_Ctrl_dev_H3K27me3_P39_vs_E14_down_234|1.3|7.31|-6.02	0	.
chr1	153049799	153065199	DB_Ctrl_dev_H3K27me3_P39_vs_E14_down_235|2|7.11|-5.11	0	.
chr5	101761199	101768799	DB_Ctrl_dev_H3K27me3_P39_vs_E14_down_236|3.51|7.11|-3.61	0	.
chr2	155625799	155633199	DB_Ctrl_dev_H3K27me3_P39_vs_E14_down_238|1.32|7.3|-5.99	0	.
chr1	39647199	39653999	DB_Ctrl_dev_H3K27me3_P39_vs_E14_down_239|1.78|7.17|-5.39	0	.
chr6	138572399	138598999	DB_Ctrl_dev_H3K27me3_P39_vs_E14_down_240|6.93|8.54|-1.61	0	.
chr6	121407799	121416599	DB_Ctrl_dev_H3K27me3_P39_vs_E14_down_241|4.11|7.28|-3.17	0	.
chr6	113278999	113285999	DB_Ctrl_dev_H3K27me3_P39_vs_E14_down_242|4.2|7.33|-3.13	0	.
chr8	27081999	27095599	DB_Ctrl_dev_H3K27me3_P39_vs_E14_down_243|5.38|7.75|-2.37	0	.
chr10	128736999	128746799	DB_Ctrl_dev_H3K27me3_P39_vs_E14_down_244|3.57|7.11|-3.54	0	.
chr4	46037599	46042799	DB_Ctrl_dev_H3K27me3_P39_vs_E14_down_245|1.3|7.29|-5.99	0	.
chr15	98890599	98901199	DB_Ctrl_dev_H3K27me3_P39_vs_E14_down_246|6.9|8.68|-1.78	0	.
chr8	95135399	95147199	DB_Ctrl_dev_H3K27me3_P39_vs_E14_down_247|3.89|7.24|-3.35	0	.
chr2	136057399	136061799	DB_Ctrl_dev_H3K27me3_P39_vs_E14_down_248|2.79|6.98|-4.19	0	.
chr2	180750999	180785599	DB_Ctrl_dev_H3K27me3_P39_vs_E14_down_249|7.72|9.1|-1.38	0	.
chr6	127151399	127159999	DB_Ctrl_dev_H3K27me3_P39_vs_E14_down_250|4.96|7.52|-2.56	0	.
chr2	118672799	118678999	DB_Ctrl_dev_H3K27me3_P39_vs_E14_down_251|3.84|7.18|-3.34	0	.
chr8	84943199	84954799	DB_Ctrl_dev_H3K27me3_P39_vs_E14_down_252|5.36|7.77|-2.41	0	.
chr11	7055999	7069799	DB_Ctrl_dev_H3K27me3_P39_vs_E14_down_253|2|7.04|-5.04	0	.
chr14	48409599	48434199	DB_Ctrl_dev_H3K27me3_P39_vs_E14_down_254|7.15|8.66|-1.52	0	.
chr5	34280999	34291399	DB_Ctrl_dev_H3K27me3_P39_vs_E14_down_255|0.99|7.43|-6.44	0	.
chr11	4742399	4753999	DB_Ctrl_dev_H3K27me3_P39_vs_E14_down_256|5.6|7.81|-2.21	0	.
chr11	35117999	35126399	DB_Ctrl_dev_H3K27me3_P39_vs_E14_down_257|4.31|7.28|-2.97	0	.
chr14	25840599	25848599	DB_Ctrl_dev_H3K27me3_P39_vs_E14_down_258|2.8|6.98|-4.18	0	.
chr4	124877999	124897599	DB_Ctrl_dev_H3K27me3_P39_vs_E14_down_259|-0.01|8.58|-8.6	0	.
chr12	76404199	76409199	DB_Ctrl_dev_H3K27me3_P39_vs_E14_down_260|3.94|7.17|-3.23	0	.
chr9	48124799	48155999	DB_Ctrl_dev_H3K27me3_P39_vs_E14_down_261|7.1|8.66|-1.55	0	.
chr5	37157199	37165199	DB_Ctrl_dev_H3K27me3_P39_vs_E14_down_262|1.79|7.08|-5.29	0	.
chr4	154852799	154862399	DB_Ctrl_dev_H3K27me3_P39_vs_E14_down_263|3.84|7.13|-3.28	0	.
chr7	121385399	121398599	DB_Ctrl_dev_H3K27me3_P39_vs_E14_down_264|5.57|7.78|-2.21	0	.
chr1	39190999	39196799	DB_Ctrl_dev_H3K27me3_P39_vs_E14_down_265|0.99|7.41|-6.42	0	.
chr10	61618399	61630599	DB_Ctrl_dev_H3K27me3_P39_vs_E14_down_266|4.79|7.46|-2.67	0	.
chr9	57500799	57508999	DB_Ctrl_dev_H3K27me3_P39_vs_E14_down_267|4.61|7.48|-2.88	0	.
chr7	142365199	142373999	DB_Ctrl_dev_H3K27me3_P39_vs_E14_down_268|3.08|7|-3.93	0	.
chr2	28736399	28822199	DB_Ctrl_dev_H3K27me3_P39_vs_E14_down_269|9.06|10.08|-1.03	0	.
chr18	63841999	63854599	DB_Ctrl_dev_H3K27me3_P39_vs_E14_down_270|4.15|7.21|-3.05	0	.
chr9	20864199	20873799	DB_Ctrl_dev_H3K27me3_P39_vs_E14_down_271|0.99|7.36|-6.37	0	.
chr2	28989799	29062999	DB_Ctrl_dev_H3K27me3_P39_vs_E14_down_273|9.34|10.33|-0.99	0	.
chr11	35492199	35517199	DB_Ctrl_dev_H3K27me3_P39_vs_E14_down_274|6.14|8.05|-1.91	0	.
chr7	25311199	25316199	DB_Ctrl_dev_H3K27me3_P39_vs_E14_down_275|3.93|7.22|-3.28	0	.
chr6	128032999	128038799	DB_Ctrl_dev_H3K27me3_P39_vs_E14_down_276|4.27|7.25|-2.97	0	.
chr6	121467799	121478799	DB_Ctrl_dev_H3K27me3_P39_vs_E14_down_277|3.45|7.02|-3.58	0	.
chr7	108948799	108954599	DB_Ctrl_dev_H3K27me3_P39_vs_E14_down_278|2.99|6.96|-3.97	0	.
chr5	138987999	139004599	DB_Ctrl_dev_H3K27me3_P39_vs_E14_down_279|-0.01|8.48|-8.49	0	.
chr17	26435799	26441799	DB_Ctrl_dev_H3K27me3_P39_vs_E14_down_280|2.14|6.96|-4.82	0	.
chr19	47176999	47181999	DB_Ctrl_dev_H3K27me3_P39_vs_E14_down_281|2.8|6.94|-4.14	0	.
chr11	121700599	121706799	DB_Ctrl_dev_H3K27me3_P39_vs_E14_down_283|2.89|6.93|-4.03	0	.
chr2	167686799	167694399	DB_Ctrl_dev_H3K27me3_P39_vs_E14_down_284|1.3|7.14|-5.84	0	.
chr4	108028799	108035799	DB_Ctrl_dev_H3K27me3_P39_vs_E14_down_285|4.19|7.22|-3.03	0	.
chr7	24927199	24958599	DB_Ctrl_dev_H3K27me3_P39_vs_E14_down_286|8.6|9.76|-1.16	0	.
chr19	48203599	48211599	DB_Ctrl_dev_H3K27me3_P39_vs_E14_down_287|1.78|6.97|-5.19	0	.
chr11	84951599	84960599	DB_Ctrl_dev_H3K27me3_P39_vs_E14_down_288|5.38|7.67|-2.29	0	.
chr5	35274399	35284199	DB_Ctrl_dev_H3K27me3_P39_vs_E14_down_290|5.54|7.77|-2.23	0	.
chr7	18954999	18969199	DB_Ctrl_dev_H3K27me3_P39_vs_E14_down_292|4.71|7.46|-2.75	0	.
chr4	126607199	126617799	DB_Ctrl_dev_H3K27me3_P39_vs_E14_down_293|3.75|7.1|-3.36	0	.
chr5	9718999	9728599	DB_Ctrl_dev_H3K27me3_P39_vs_E14_down_294|3.38|6.97|-3.59	0	.
chr7	44350199	44359399	DB_Ctrl_dev_H3K27me3_P39_vs_E14_down_295|-0.01|8.41|-8.42	0	.
chr3	87986399	88010599	DB_Ctrl_dev_H3K27me3_P39_vs_E14_down_296|7.54|8.9|-1.36	0	.
chr15	82205999	82217999	DB_Ctrl_dev_H3K27me3_P39_vs_E14_down_297|6.42|8.28|-1.85	0	.
chr8	70080599	70091799	DB_Ctrl_dev_H3K27me3_P39_vs_E14_down_298|-0.01|8.4|-8.41	0	.
chr12	112926399	112935199	DB_Ctrl_dev_H3K27me3_P39_vs_E14_down_299|1.57|7|-5.43	0	.
chr15	99219599	99235199	DB_Ctrl_dev_H3K27me3_P39_vs_E14_down_300|-0.01|8.38|-8.4	0	.
chr17	62866999	62882399	DB_Ctrl_dev_H3K27me3_P39_vs_E14_down_301|5.49|7.73|-2.23	0	.
chr6	115983999	115994799	DB_Ctrl_dev_H3K27me3_P39_vs_E14_down_302|3.98|7.18|-3.2	0	.
chr2	38686999	38716999	DB_Ctrl_dev_H3K27me3_P39_vs_E14_down_303|8.24|9.41|-1.17	0	.
chr7	139186199	139192799	DB_Ctrl_dev_H3K27me3_P39_vs_E14_down_304|3.74|7.06|-3.31	0	.
chr5	98248999	98257799	DB_Ctrl_dev_H3K27me3_P39_vs_E14_down_305|4.74|7.39|-2.65	0	.
chr1	74846799	74862999	DB_Ctrl_dev_H3K27me3_P39_vs_E14_down_306|-0.01|8.33|-8.35	0	.
chr4	139069799	139079599	DB_Ctrl_dev_H3K27me3_P39_vs_E14_down_307|0.57|7.6|-7.03	0	.
chr4	134701399	134706799	DB_Ctrl_dev_H3K27me3_P39_vs_E14_down_308|1.8|6.91|-5.11	0	.
chr15	76225799	76235399	DB_Ctrl_dev_H3K27me3_P39_vs_E14_down_309|-0.01|8.32|-8.34	0	.
chr17	56140399	56162399	DB_Ctrl_dev_H3K27me3_P39_vs_E14_down_310|6.17|8.06|-1.89	0	.
chr10	79964199	79978199	DB_Ctrl_dev_H3K27me3_P39_vs_E14_down_311|4.31|7.27|-2.96	0	.
chr2	33593199	33653599	DB_Ctrl_dev_H3K27me3_P39_vs_E14_down_313|9.59|10.63|-1.04	0	.
chr9	58194599	58204399	DB_Ctrl_dev_H3K27me3_P39_vs_E14_down_315|3.16|6.92|-3.76	0	.
chr6	85505199	85519599	DB_Ctrl_dev_H3K27me3_P39_vs_E14_down_316|-0.01|8.3|-8.32	0	.
chr11	115309399	115326999	DB_Ctrl_dev_H3K27me3_P39_vs_E14_down_317|7.26|8.73|-1.48	0	.
chr2	77813199	77820999	DB_Ctrl_dev_H3K27me3_P39_vs_E14_down_318|2.79|6.91|-4.13	0	.
chr5	35753399	35763399	DB_Ctrl_dev_H3K27me3_P39_vs_E14_down_319|3.63|6.99|-3.37	0	.
chr11	87759599	87771599	DB_Ctrl_dev_H3K27me3_P39_vs_E14_down_320|3.16|6.91|-3.75	0	.
chr2	164958399	164974399	DB_Ctrl_dev_H3K27me3_P39_vs_E14_down_321|-0.01|8.28|-8.3	0	.
chr15	78714399	78720799	DB_Ctrl_dev_H3K27me3_P39_vs_E14_down_322|1.3|7.05|-5.75	0	.
chr16	28561399	28568199	DB_Ctrl_dev_H3K27me3_P39_vs_E14_down_323|3.23|6.94|-3.71	0	.
chr11	5055999	5064999	DB_Ctrl_dev_H3K27me3_P39_vs_E14_down_324|-0.01|8.27|-8.29	0	.
chr11	52762399	52766799	DB_Ctrl_dev_H3K27me3_P39_vs_E14_down_325|4.38|7.22|-2.85	0	.
chr2	25574999	25583599	DB_Ctrl_dev_H3K27me3_P39_vs_E14_down_326|-0.01|8.27|-8.28	0	.
chr11	103643999	103657399	DB_Ctrl_dev_H3K27me3_P39_vs_E14_down_327|-0.01|8.27|-8.28	0	.
chr7	28286799	28295799	DB_Ctrl_dev_H3K27me3_P39_vs_E14_down_328|5.53|7.77|-2.24	0	.
chr5	36864399	36878999	DB_Ctrl_dev_H3K27me3_P39_vs_E14_down_329|-0.01|8.24|-8.25	0	.
chr2	25286399	25298599	DB_Ctrl_dev_H3K27me3_P39_vs_E14_down_330|-0.01|8.24|-8.25	0	.
chr8	70607799	70612399	DB_Ctrl_dev_H3K27me3_P39_vs_E14_down_331|2|6.87|-4.87	0	.
chr3	107454399	107466599	DB_Ctrl_dev_H3K27me3_P39_vs_E14_down_332|-0.01|8.23|-8.25	0	.
chr17	46290999	46301199	DB_Ctrl_dev_H3K27me3_P39_vs_E14_down_333|4.2|7.14|-2.95	0	.
chr15	78116999	78130799	DB_Ctrl_dev_H3K27me3_P39_vs_E14_down_334|1.58|6.94|-5.36	0	.
chr8	84700999	84709199	DB_Ctrl_dev_H3K27me3_P39_vs_E14_down_336|1.58|6.93|-5.35	0	.
chr13	103330599	103336599	DB_Ctrl_dev_H3K27me3_P39_vs_E14_down_337|1.3|7.02|-5.73	0	.
chr16	35147399	35159199	DB_Ctrl_dev_H3K27me3_P39_vs_E14_down_338|3.23|6.88|-3.65	0	.
chr7	131638999	131655399	DB_Ctrl_dev_H3K27me3_P39_vs_E14_down_339|6.69|8.33|-1.64	0	.
chr10	127656799	127670399	DB_Ctrl_dev_H3K27me3_P39_vs_E14_down_340|-0.01|8.21|-8.22	0	.
chr11	90382999	90390999	DB_Ctrl_dev_H3K27me3_P39_vs_E14_down_341|1.58|6.92|-5.34	0	.
chr10	128926799	128940799	DB_Ctrl_dev_H3K27me3_P39_vs_E14_down_342|5.64|7.75|-2.1	0	.
chr6	126736199	126742399	DB_Ctrl_dev_H3K27me3_P39_vs_E14_down_343|1.78|6.86|-5.08	0	.
chr17	47735599	47744199	DB_Ctrl_dev_H3K27me3_P39_vs_E14_down_346|4.45|7.32|-2.87	0	.
chr7	121331799	121350999	DB_Ctrl_dev_H3K27me3_P39_vs_E14_down_347|6.42|8.14|-1.72	0	.
chr11	4944999	4963999	DB_Ctrl_dev_H3K27me3_P39_vs_E14_down_348|3.22|8.59|-5.37	0	.
chr11	61014999	61027199	DB_Ctrl_dev_H3K27me3_P39_vs_E14_down_349|5.51|7.66|-2.16	0	.
chr1	64729799	64743199	DB_Ctrl_dev_H3K27me3_P39_vs_E14_down_350|6.86|8.4|-1.55	0	.
chr4	106816399	106832199	DB_Ctrl_dev_H3K27me3_P39_vs_E14_down_351|5.07|7.48|-2.4	0	.
chr5	144544399	144551199	DB_Ctrl_dev_H3K27me3_P39_vs_E14_down_352|3.31|6.88|-3.57	0	.
chr6	91839599	91847999	DB_Ctrl_dev_H3K27me3_P39_vs_E14_down_353|2.99|6.88|-3.9	0	.
chr15	79789799	79807799	DB_Ctrl_dev_H3K27me3_P39_vs_E14_down_354|-0.01|8.17|-8.18	0	.
chr15	102684999	102700799	DB_Ctrl_dev_H3K27me3_P39_vs_E14_down_355|5.6|7.7|-2.1	0	.
chr7	25684599	25713399	DB_Ctrl_dev_H3K27me3_P39_vs_E14_down_356|7.5|8.91|-1.41	0	.
chr4	47090199	47097599	DB_Ctrl_dev_H3K27me3_P39_vs_E14_down_357|4.66|7.3|-2.64	0	.
chr2	33536799	33546399	DB_Ctrl_dev_H3K27me3_P39_vs_E14_down_358|4.23|7.14|-2.91	0	.
chr11	53475199	53491399	DB_Ctrl_dev_H3K27me3_P39_vs_E14_down_359|-0.01|8.13|-8.14	0	.
chr11	3758599	3778599	DB_Ctrl_dev_H3K27me3_P39_vs_E14_down_360|-0.01|8.13|-8.14	0	.
chr5	24521599	24533199	DB_Ctrl_dev_H3K27me3_P39_vs_E14_down_362|6.46|8.19|-1.73	0	.
chr3	116247399	116252999	DB_Ctrl_dev_H3K27me3_P39_vs_E14_down_363|3.31|6.86|-3.56	0	.
chr7	112221599	112230599	DB_Ctrl_dev_H3K27me3_P39_vs_E14_down_364|2|6.82|-4.83	0	.
chr9	8898999	8903599	DB_Ctrl_dev_H3K27me3_P39_vs_E14_down_366|1.3|6.95|-5.65	0	.
chr11	76992399	77007999	DB_Ctrl_dev_H3K27me3_P39_vs_E14_down_367|6.02|7.93|-1.91	0	.
chr13	98558399	98594199	DB_Ctrl_dev_H3K27me3_P39_vs_E14_down_368|8.24|9.46|-1.23	0	.
chr16	22653999	22660799	DB_Ctrl_dev_H3K27me3_P39_vs_E14_down_369|2.14|6.8|-4.66	0	.
chr9	121491799	121498999	DB_Ctrl_dev_H3K27me3_P39_vs_E14_down_370|4.57|7.26|-2.69	0	.
chr19	53526999	53532399	DB_Ctrl_dev_H3K27me3_P39_vs_E14_down_371|2.31|6.74|-4.43	0	.
chr10	80488599	80508199	DB_Ctrl_dev_H3K27me3_P39_vs_E14_down_372|8.48|9.58|-1.09	0	.
chr8	25095999	25106999	DB_Ctrl_dev_H3K27me3_P39_vs_E14_down_373|5.9|7.93|-2.03	0	.
chr9	56631799	56652799	DB_Ctrl_dev_H3K27me3_P39_vs_E14_down_374|-0.01|8.06|-8.08	0	.
chr13	95217599	95227399	DB_Ctrl_dev_H3K27me3_P39_vs_E14_down_376|2.16|6.78|-4.62	0	.
chr14	66273599	66282799	DB_Ctrl_dev_H3K27me3_P39_vs_E14_down_377|0.58|7.37|-6.79	0	.
chr4	125480999	125501599	DB_Ctrl_dev_H3K27me3_P39_vs_E14_down_378|7.56|8.88|-1.32	0	.
chr1	86041399	86049599	DB_Ctrl_dev_H3K27me3_P39_vs_E14_down_379|0.57|7.37|-6.81	0	.
chr5	33422999	33450599	DB_Ctrl_dev_H3K27me3_P39_vs_E14_down_380|8.58|9.66|-1.07	0	.
chr2	13006599	13014599	DB_Ctrl_dev_H3K27me3_P39_vs_E14_down_381|4.2|7.09|-2.9	0	.
chr10	79710199	79726799	DB_Ctrl_dev_H3K27me3_P39_vs_E14_down_382|-0.01|8.03|-8.04	0	.
chr11	100756399	100764599	DB_Ctrl_dev_H3K27me3_P39_vs_E14_down_383|1.8|6.79|-4.98	0	.
chr7	141457599	141470599	DB_Ctrl_dev_H3K27me3_P39_vs_E14_down_384|6.03|8.14|-2.1	0	.
chr9	20723199	20730599	DB_Ctrl_dev_H3K27me3_P39_vs_E14_down_385|1.3|6.9|-5.61	0	.
chr11	35655599	35668199	DB_Ctrl_dev_H3K27me3_P39_vs_E14_down_386|3.78|7.13|-3.34	0	.
chr3	88480599	88490999	DB_Ctrl_dev_H3K27me3_P39_vs_E14_down_387|4.02|7.11|-3.08	0	.
chr1	180478799	180484399	DB_Ctrl_dev_H3K27me3_P39_vs_E14_down_388|3.07|6.79|-3.72	0	.
chr12	76707399	76715999	DB_Ctrl_dev_H3K27me3_P39_vs_E14_down_389|3.68|6.98|-3.3	0	.
chr9	21239799	21253799	DB_Ctrl_dev_H3K27me3_P39_vs_E14_down_390|6.62|8.23|-1.61	0	.
chr4	133036199	133042999	DB_Ctrl_dev_H3K27me3_P39_vs_E14_down_391|1.56|6.82|-5.25	0	.
chr7	3417999	3425999	DB_Ctrl_dev_H3K27me3_P39_vs_E14_down_392|3.51|6.94|-3.42	0	.
chr2	25315799	25325999	DB_Ctrl_dev_H3K27me3_P39_vs_E14_down_394|4.19|7.1|-2.9	0	.
chr15	80010999	80021999	DB_Ctrl_dev_H3K27me3_P39_vs_E14_down_395|-0.01|7.98|-8	0	.
chr11	84686999	84715199	DB_Ctrl_dev_H3K27me3_P39_vs_E14_down_396|6.69|8.34|-1.65	0	.
chr2	21364799	21372199	DB_Ctrl_dev_H3K27me3_P39_vs_E14_down_397|1.78|6.8|-5.02	0	.
chr5	143250599	143261999	DB_Ctrl_dev_H3K27me3_P39_vs_E14_down_398|-0.01|7.98|-7.99	0	.
chr17	34627999	34637599	DB_Ctrl_dev_H3K27me3_P39_vs_E14_down_399|0.58|7.31|-6.73	0	.
chr8	122281199	122285599	DB_Ctrl_dev_H3K27me3_P39_vs_E14_down_400|0.98|7.01|-6.03	0	.
chr13	96129199	96135599	DB_Ctrl_dev_H3K27me3_P39_vs_E14_down_401|2.17|6.75|-4.59	0	.
chr8	106866599	106874199	DB_Ctrl_dev_H3K27me3_P39_vs_E14_down_402|3.89|7|-3.11	0	.
chr17	23695999	23704199	DB_Ctrl_dev_H3K27me3_P39_vs_E14_down_403|2.98|6.83|-3.85	0	.
chr16	18618399	18628999	DB_Ctrl_dev_H3K27me3_P39_vs_E14_down_404|-0.01|7.94|-7.96	0	.
chr17	26411799	26422199	DB_Ctrl_dev_H3K27me3_P39_vs_E14_down_405|2.79|6.71|-3.92	0	.
chr9	67043799	67052999	DB_Ctrl_dev_H3K27me3_P39_vs_E14_down_406|5.44|7.6|-2.16	0	.
chr8	13489999	13496599	DB_Ctrl_dev_H3K27me3_P39_vs_E14_down_408|2.14|6.73|-4.59	0	.
chr17	25424599	25438199	DB_Ctrl_dev_H3K27me3_P39_vs_E14_down_409|4.5|7.25|-2.74	0	.
chr7	63752799	63762399	DB_Ctrl_dev_H3K27me3_P39_vs_E14_down_410|-0.01|7.91|-7.93	0	.
chr9	29409799	29417399	DB_Ctrl_dev_H3K27me3_P39_vs_E14_down_411|0.99|6.98|-5.99	0	.
chr2	181667799	181674199	DB_Ctrl_dev_H3K27me3_P39_vs_E14_down_412|5.63|7.68|-2.05	0	.
chr1	89740999	89750599	DB_Ctrl_dev_H3K27me3_P39_vs_E14_down_413|3.57|6.91|-3.35	0	.
chr7	40896199	40904799	DB_Ctrl_dev_H3K27me3_P39_vs_E14_down_414|0.99|6.96|-5.97	0	.
chr9	44732799	44738199	DB_Ctrl_dev_H3K27me3_P39_vs_E14_down_415|2.98|6.82|-3.84	0	.
chr5	139904399	139916999	DB_Ctrl_dev_H3K27me3_P39_vs_E14_down_416|6.76|8.4|-1.64	0	.
chr12	16996799	17004399	DB_Ctrl_dev_H3K27me3_P39_vs_E14_down_417|2.68|6.69|-4.01	0	.
chr7	5048799	5060599	DB_Ctrl_dev_H3K27me3_P39_vs_E14_down_419|-0.01|7.88|-7.9	0	.
chr7	65146399	65159799	DB_Ctrl_dev_H3K27me3_P39_vs_E14_down_420|4.53|7.3|-2.77	0	.
chr9	48724399	48735799	DB_Ctrl_dev_H3K27me3_P39_vs_E14_down_421|1.58|6.76|-5.18	0	.
chr12	58210599	58216199	DB_Ctrl_dev_H3K27me3_P39_vs_E14_down_422|3.45|6.89|-3.44	0	.
chr11	96240599	96386999	DB_Ctrl_dev_H3K27me3_P39_vs_E14_down_423|11.38|12.27|-0.89	0	.
chr7	45831199	45838599	DB_Ctrl_dev_H3K27me3_P39_vs_E14_down_425|-0.01|7.87|-7.89	0	.
chr19	6426999	6431599	DB_Ctrl_dev_H3K27me3_P39_vs_E14_down_426|3.75|6.98|-3.23	0	.
chr19	46310199	46321599	DB_Ctrl_dev_H3K27me3_P39_vs_E14_down_427|-0.01|7.87|-7.88	0	.
chr9	67828999	67836599	DB_Ctrl_dev_H3K27me3_P39_vs_E14_down_428|4.51|7.2|-2.69	0	.
chr7	19411799	19423599	DB_Ctrl_dev_H3K27me3_P39_vs_E14_down_429|5.19|7.47|-2.27	0	.
chr11	97497599	97510599	DB_Ctrl_dev_H3K27me3_P39_vs_E14_down_430|-0.01|7.85|-7.87	0	.
chr8	70887799	70894599	DB_Ctrl_dev_H3K27me3_P39_vs_E14_down_431|5.17|7.45|-2.27	0	.
chr7	49969999	49985399	DB_Ctrl_dev_H3K27me3_P39_vs_E14_down_432|6.09|7.91|-1.81	0	.
chr2	180889199	180894599	DB_Ctrl_dev_H3K27me3_P39_vs_E14_down_433|3.38|6.79|-3.42	0	.
chr16	13441599	13467399	DB_Ctrl_dev_H3K27me3_P39_vs_E14_down_434|6.91|8.43|-1.52	0	.
chr8	106929799	106941399	DB_Ctrl_dev_H3K27me3_P39_vs_E14_down_435|4.92|7.31|-2.4	0	.
chr15	74514599	74520799	DB_Ctrl_dev_H3K27me3_P39_vs_E14_down_437|-0.01|7.81|-7.83	0	.
chr19	45298999	45308399	DB_Ctrl_dev_H3K27me3_P39_vs_E14_down_438|1.78|6.69|-4.91	0	.
chr2	32078199	32091399	DB_Ctrl_dev_H3K27me3_P39_vs_E14_down_439|-0.01|7.8|-7.82	0	.
chr12	8289599	8306599	DB_Ctrl_dev_H3K27me3_P39_vs_E14_down_441|7.34|8.72|-1.38	0	.
chr1	89909399	89983599	DB_Ctrl_dev_H3K27me3_P39_vs_E14_down_442|9.92|10.81|-0.89	0	.
chr2	133546399	133558599	DB_Ctrl_dev_H3K27me3_P39_vs_E14_down_443|6.14|7.94|-1.8	0	.
chr4	59433799	59443399	DB_Ctrl_dev_H3K27me3_P39_vs_E14_down_444|4.2|7.04|-2.84	0	.
chr8	84907599	84920799	DB_Ctrl_dev_H3K27me3_P39_vs_E14_down_446|4.24|7.08|-2.84	0	.
chr4	46596999	46606399	DB_Ctrl_dev_H3K27me3_P39_vs_E14_down_447|3.24|6.85|-3.6	0	.
chr7	44329999	44342999	DB_Ctrl_dev_H3K27me3_P39_vs_E14_down_448|0.58|7.15|-6.57	0	.
chr19	36050799	36062199	DB_Ctrl_dev_H3K27me3_P39_vs_E14_down_449|4.71|7.23|-2.52	0	.
chr13	37774199	37782799	DB_Ctrl_dev_H3K27me3_P39_vs_E14_down_450|4.44|7.11|-2.67	0	.
chr2	162119999	162139399	DB_Ctrl_dev_H3K27me3_P39_vs_E14_down_451|4.89|7.48|-2.59	0	.
chr15	81691999	81696599	DB_Ctrl_dev_H3K27me3_P39_vs_E14_down_452|3.74|6.89|-3.16	0	.
chr11	118566999	118573399	DB_Ctrl_dev_H3K27me3_P39_vs_E14_down_453|-0.01|7.75|-7.77	0	.
chr9	37428799	37435999	DB_Ctrl_dev_H3K27me3_P39_vs_E14_down_454|4.51|7.15|-2.64	0	.
chr19	45075199	45090199	DB_Ctrl_dev_H3K27me3_P39_vs_E14_down_455|7.07|8.5|-1.43	0	.
chr5	81020399	81027799	DB_Ctrl_dev_H3K27me3_P39_vs_E14_down_456|3.58|6.86|-3.28	0	.
chr2	29745199	29757799	DB_Ctrl_dev_H3K27me3_P39_vs_E14_down_457|6.37|8.06|-1.7	0	.
chr1	132065999	132071599	DB_Ctrl_dev_H3K27me3_P39_vs_E14_down_459|2.15|6.59|-4.44	0	.
chr9	69288999	69295199	DB_Ctrl_dev_H3K27me3_P39_vs_E14_down_460|3.8|7.04|-3.24	0	.
chr2	18604199	18613599	DB_Ctrl_dev_H3K27me3_P39_vs_E14_down_461|5.36|7.56|-2.2	0	.
chr13	117600399	117606199	DB_Ctrl_dev_H3K27me3_P39_vs_E14_down_462|2.44|6.62|-4.18	0	.
chr17	25397399	25406199	DB_Ctrl_dev_H3K27me3_P39_vs_E14_down_463|4.03|6.96|-2.93	0	.
chr2	25301599	25314999	DB_Ctrl_dev_H3K27me3_P39_vs_E14_down_464|-0.01|7.72|-7.73	0	.
chr15	79247199	79255799	DB_Ctrl_dev_H3K27me3_P39_vs_E14_down_465|4.48|7.16|-2.67	0	.
chr11	113839399	113850799	DB_Ctrl_dev_H3K27me3_P39_vs_E14_down_466|2.57|6.62|-4.06	0	.
chr19	55378399	55389399	DB_Ctrl_dev_H3K27me3_P39_vs_E14_down_467|3.57|6.83|-3.25	0	.
chr11	94470799	94476399	DB_Ctrl_dev_H3K27me3_P39_vs_E14_down_468|3.69|6.9|-3.21	0	.
chr1	75382399	75391999	DB_Ctrl_dev_H3K27me3_P39_vs_E14_down_469|-0.01|7.71|-7.72	0	.
chr2	119740599	119748199	DB_Ctrl_dev_H3K27me3_P39_vs_E14_down_470|-0.01|7.7|-7.71	0	.
chr8	95674799	95682199	DB_Ctrl_dev_H3K27me3_P39_vs_E14_down_471|2.31|6.6|-4.29	0	.
chr10	127075199	127087199	DB_Ctrl_dev_H3K27me3_P39_vs_E14_down_472|-0.01|7.7|-7.71	0	.
chr19	22588399	22600199	DB_Ctrl_dev_H3K27me3_P39_vs_E14_down_473|3.98|6.94|-2.95	0	.
chr8	104532999	104545399	DB_Ctrl_dev_H3K27me3_P39_vs_E14_down_475|-0.01|7.69|-7.7	0	.
chr15	84441799	84451399	DB_Ctrl_dev_H3K27me3_P39_vs_E14_down_476|2.31|6.59|-4.27	0	.
chr16	30059799	30074599	DB_Ctrl_dev_H3K27me3_P39_vs_E14_down_477|-0.01|7.69|-7.7	0	.
chr2	162657399	162663399	DB_Ctrl_dev_H3K27me3_P39_vs_E14_down_478|1.78|6.63|-4.85	0	.
chr8	27222999	27235599	DB_Ctrl_dev_H3K27me3_P39_vs_E14_down_479|5.74|7.7|-1.96	0	.
chr11	43831399	43837399	DB_Ctrl_dev_H3K27me3_P39_vs_E14_down_480|3.08|6.79|-3.7	0	.
chr5	37881999	37923799	DB_Ctrl_dev_H3K27me3_P39_vs_E14_down_481|8.75|9.73|-0.98	0	.
chr4	124982599	124992199	DB_Ctrl_dev_H3K27me3_P39_vs_E14_down_482|6.28|8.05|-1.77	0	.
chr5	121827999	121839799	DB_Ctrl_dev_H3K27me3_P39_vs_E14_down_483|-0.01|7.66|-7.68	0	.
chr1	134640799	134659799	DB_Ctrl_dev_H3K27me3_P39_vs_E14_down_484|7.11|8.49|-1.37	0	.
chr6	145858599	145868599	DB_Ctrl_dev_H3K27me3_P39_vs_E14_down_485|-0.01|7.65|-7.67	0	.
chr5	37804799	37841599	DB_Ctrl_dev_H3K27me3_P39_vs_E14_down_486|9.21|10.14|-0.93	0	.
chr10	81192199	81197799	DB_Ctrl_dev_H3K27me3_P39_vs_E14_down_487|1.8|6.59|-4.79	0	.
chr12	70109199	70116199	DB_Ctrl_dev_H3K27me3_P39_vs_E14_down_488|0.99|6.8|-5.81	0	.
chr6	118009599	118015799	DB_Ctrl_dev_H3K27me3_P39_vs_E14_down_490|0.99|6.8|-5.81	0	.
chr15	79257599	79263999	DB_Ctrl_dev_H3K27me3_P39_vs_E14_down_491|4.07|6.94|-2.87	0	.
chr7	25126399	25136799	DB_Ctrl_dev_H3K27me3_P39_vs_E14_down_492|1.3|6.72|-5.42	0	.
chr6	115359799	115362999	DB_Ctrl_dev_H3K27me3_P39_vs_E14_down_494|3.16|6.67|-3.52	0	.
chr15	98698999	98712799	DB_Ctrl_dev_H3K27me3_P39_vs_E14_down_495|-0.01|7.62|-7.64	0	.
chr5	135848199	135854799	DB_Ctrl_dev_H3K27me3_P39_vs_E14_down_496|0.98|6.79|-5.81	0	.
chr7	16882999	16887799	DB_Ctrl_dev_H3K27me3_P39_vs_E14_down_497|2.79|6.6|-3.81	0	.
chr10	11078799	11083399	DB_Ctrl_dev_H3K27me3_P39_vs_E14_down_498|3.31|6.7|-3.39	0	.
chr17	36935599	36947199	DB_Ctrl_dev_H3K27me3_P39_vs_E14_down_499|5.5|7.65|-2.15	0	.
chr14	46877799	46885599	DB_Ctrl_dev_H3K27me3_P39_vs_E14_down_500|2.57|6.58|-4.01	0	.
chr1	187600799	187614799	DB_Ctrl_dev_H3K27me3_P39_vs_E14_down_501|7.27|8.6|-1.33	0	.
chr4	103616999	103623599	DB_Ctrl_dev_H3K27me3_P39_vs_E14_down_502|4.03|6.92|-2.89	0	.
chr3	55777599	55791799	DB_Ctrl_dev_H3K27me3_P39_vs_E14_down_503|2.14|8.41|-6.26	0	.
chr16	28442399	28448799	DB_Ctrl_dev_H3K27me3_P39_vs_E14_down_504|0.99|6.79|-5.8	0	.
chr11	101172199	101180599	DB_Ctrl_dev_H3K27me3_P39_vs_E14_down_505|-0.01|7.6|-7.61	0	.
chr4	120656799	120672799	DB_Ctrl_dev_H3K27me3_P39_vs_E14_down_506|4.48|7.25|-2.77	0	.
chr15	89545799	89559999	DB_Ctrl_dev_H3K27me3_P39_vs_E14_down_507|-0.01|7.58|-7.59	0	.
chr19	56717599	56726199	DB_Ctrl_dev_H3K27me3_P39_vs_E14_down_509|-0.01|7.58|-7.59	0	.
chr8	126135599	126144999	DB_Ctrl_dev_H3K27me3_P39_vs_E14_down_511|4.41|7.06|-2.65	0	.
chr7	29169999	29175799	DB_Ctrl_dev_H3K27me3_P39_vs_E14_down_512|5.24|7.46|-2.23	0	.
chr11	6061999	6070999	DB_Ctrl_dev_H3K27me3_P39_vs_E14_down_513|-0.01|7.57|-7.58	0	.
chr11	75277199	75285399	DB_Ctrl_dev_H3K27me3_P39_vs_E14_down_514|0.58|7|-6.42	0	.
chr14	17657399	17663599	DB_Ctrl_dev_H3K27me3_P39_vs_E14_down_515|1.8|6.61|-4.81	0	.
chr4	127160999	127175599	DB_Ctrl_dev_H3K27me3_P39_vs_E14_down_516|5|7.34|-2.34	0	.
chr19	23131199	23144599	DB_Ctrl_dev_H3K27me3_P39_vs_E14_down_517|-0.01|7.55|-7.57	0	.
chr13	52971599	52979799	DB_Ctrl_dev_H3K27me3_P39_vs_E14_down_518|2.45|6.59|-4.14	0	.
chr2	24755599	24768199	DB_Ctrl_dev_H3K27me3_P39_vs_E14_down_519|3.94|6.89|-2.95	0	.
chr17	26110399	26122599	DB_Ctrl_dev_H3K27me3_P39_vs_E14_down_520|4.74|7.17|-2.43	0	.
chr8	120631399	120637999	DB_Ctrl_dev_H3K27me3_P39_vs_E14_down_521|4.31|7.01|-2.7	0	.
chr1	75257799	75269399	DB_Ctrl_dev_H3K27me3_P39_vs_E14_down_523|-0.01|7.55|-7.56	0	.
chr3	157564199	157570999	DB_Ctrl_dev_H3K27me3_P39_vs_E14_down_524|4.41|7.15|-2.75	0	.
chr5	114570399	114594399	DB_Ctrl_dev_H3K27me3_P39_vs_E14_down_525|6.7|8.23|-1.53	0	.
chr7	25176999	25183199	DB_Ctrl_dev_H3K27me3_P39_vs_E14_down_526|3.24|6.68|-3.45	0	.
chr7	131718999	131753199	DB_Ctrl_dev_H3K27me3_P39_vs_E14_down_527|7.85|9.03|-1.18	0	.
chr9	111436199	111442799	DB_Ctrl_dev_H3K27me3_P39_vs_E14_down_528|1.97|6.57|-4.59	0	.
chr7	31048399	31057799	DB_Ctrl_dev_H3K27me3_P39_vs_E14_down_529|-0.01|7.54|-7.55	0	.
chr17	47424999	47442799	DB_Ctrl_dev_H3K27me3_P39_vs_E14_down_531|6.47|8.06|-1.59	0	.
chr14	119135399	119140599	DB_Ctrl_dev_H3K27me3_P39_vs_E14_down_533|4.03|6.9|-2.87	0	.
chr4	101290399	101294399	DB_Ctrl_dev_H3K27me3_P39_vs_E14_down_534|4.38|7.02|-2.64	0	.
chr11	76647399	76660999	DB_Ctrl_dev_H3K27me3_P39_vs_E14_down_535|4.71|7.25|-2.55	0	.
chr19	6010999	6017599	DB_Ctrl_dev_H3K27me3_P39_vs_E14_down_536|0.98|6.72|-5.74	0	.
chr2	18797799	18803799	DB_Ctrl_dev_H3K27me3_P39_vs_E14_down_537|3.73|6.87|-3.13	0	.
chr9	122623999	122634599	DB_Ctrl_dev_H3K27me3_P39_vs_E14_down_538|0.99|6.72|-5.73	0	.
chr8	35822199	35831399	DB_Ctrl_dev_H3K27me3_P39_vs_E14_down_539|5.63|7.61|-1.98	0	.
chr14	23453599	23466599	DB_Ctrl_dev_H3K27me3_P39_vs_E14_down_540|4.47|7.09|-2.62	0	.
chr6	8945199	8960399	DB_Ctrl_dev_H3K27me3_P39_vs_E14_down_542|7.36|8.67|-1.31	0	.
chr11	117883599	117896799	DB_Ctrl_dev_H3K27me3_P39_vs_E14_down_543|6.45|8.03|-1.58	0	.
chr9	102345199	102354399	DB_Ctrl_dev_H3K27me3_P39_vs_E14_down_544|2.68|6.68|-4	0	.
chr18	39484399	39490399	DB_Ctrl_dev_H3K27me3_P39_vs_E14_down_545|2.16|6.5|-4.34	0	.
chr7	4464999	4480999	DB_Ctrl_dev_H3K27me3_P39_vs_E14_down_546|4.99|7.47|-2.48	0	.
chr11	119054199	119062399	DB_Ctrl_dev_H3K27me3_P39_vs_E14_down_548|5.71|7.64|-1.93	0	.
chr7	44949599	44955599	DB_Ctrl_dev_H3K27me3_P39_vs_E14_down_549|1.57|6.54|-4.97	0	.
chr11	97982799	97987999	DB_Ctrl_dev_H3K27me3_P39_vs_E14_down_550|3.31|6.68|-3.38	0	.
chr7	44586999	44595199	DB_Ctrl_dev_H3K27me3_P39_vs_E14_down_551|-0.01|7.48|-7.5	0	.
chr15	76715599	76723599	DB_Ctrl_dev_H3K27me3_P39_vs_E14_down_552|2.99|6.62|-3.62	0	.
chr16	9988999	9997199	DB_Ctrl_dev_H3K27me3_P39_vs_E14_down_553|-0.01|7.47|-7.48	0	.
chr17	69075799	69079799	DB_Ctrl_dev_H3K27me3_P39_vs_E14_down_554|1.56|6.56|-5	0	.
chr4	117923799	117930999	DB_Ctrl_dev_H3K27me3_P39_vs_E14_down_555|5.35|7.53|-2.18	0	.
chr9	30937799	30946599	DB_Ctrl_dev_H3K27me3_P39_vs_E14_down_556|4.2|7.12|-2.92	0	.
chr10	99263599	99269599	DB_Ctrl_dev_H3K27me3_P39_vs_E14_down_557|1.99|6.5|-4.51	0	.
chr4	46532999	46541399	DB_Ctrl_dev_H3K27me3_P39_vs_E14_down_560|5.43|7.47|-2.05	0	.
chr17	85450999	85479399	DB_Ctrl_dev_H3K27me3_P39_vs_E14_down_561|8.19|9.23|-1.04	0	.
chr18	15060399	15067999	DB_Ctrl_dev_H3K27me3_P39_vs_E14_down_562|-0.01|7.44|-7.45	0	.
chr4	120030199	120036199	DB_Ctrl_dev_H3K27me3_P39_vs_E14_down_563|1.58|6.52|-4.94	0	.
chr8	106967799	106978399	DB_Ctrl_dev_H3K27me3_P39_vs_E14_down_564|3.38|6.67|-3.29	0	.
chr8	84334999	84342999	DB_Ctrl_dev_H3K27me3_P39_vs_E14_down_565|4.03|6.89|-2.87	0	.
chr11	81148399	81157199	DB_Ctrl_dev_H3K27me3_P39_vs_E14_down_566|4.69|7.17|-2.48	0	.
chr18	38595399	38604199	DB_Ctrl_dev_H3K27me3_P39_vs_E14_down_567|5.16|7.37|-2.21	0	.
chr16	94990599	94999599	DB_Ctrl_dev_H3K27me3_P39_vs_E14_down_568|1.31|6.56|-5.25	0	.
chr3	93437399	93450399	DB_Ctrl_dev_H3K27me3_P39_vs_E14_down_569|6.06|7.81|-1.75	0	.
chrX	98147799	98153399	DB_Ctrl_dev_H3K27me3_P39_vs_E14_down_571|3.08|6.6|-3.52	0	.
chr11	85483399	85493399	DB_Ctrl_dev_H3K27me3_P39_vs_E14_down_573|3.74|6.82|-3.09	0	.
chr2	34096199	34136199	DB_Ctrl_dev_H3K27me3_P39_vs_E14_down_574|7.85|8.98|-1.13	0	.
chr13	55418799	55422799	DB_Ctrl_dev_H3K27me3_P39_vs_E14_down_575|3.84|6.84|-3	0	.
chr18	36280399	36286599	DB_Ctrl_dev_H3K27me3_P39_vs_E14_down_576|-0.01|7.38|-7.4	0	.
chr1	154197399	154206799	DB_Ctrl_dev_H3K27me3_P39_vs_E14_down_577|3.8|6.9|-3.1	0	.
chr9	21160799	21168599	DB_Ctrl_dev_H3K27me3_P39_vs_E14_down_578|-0.01|7.39|-7.4	0	.
chr1	189766799	189801799	DB_Ctrl_dev_H3K27me3_P39_vs_E14_down_579|7.94|9.03|-1.09	0	.
chr8	84024999	84029399	DB_Ctrl_dev_H3K27me3_P39_vs_E14_down_580|2.89|6.53|-3.64	0	.
chr10	127088199	127094199	DB_Ctrl_dev_H3K27me3_P39_vs_E14_down_582|-0.01|7.38|-7.39	0	.
chr9	121774599	121780799	DB_Ctrl_dev_H3K27me3_P39_vs_E14_down_583|0.58|6.84|-6.27	0	.
chr2	167178799	167191999	DB_Ctrl_dev_H3K27me3_P39_vs_E14_down_586|-0.01|7.35|-7.36	0	.
chr1	14753399	14758999	DB_Ctrl_dev_H3K27me3_P39_vs_E14_down_588|3.85|6.88|-3.03	0	.
chr17	47670199	47674999	DB_Ctrl_dev_H3K27me3_P39_vs_E14_down_589|1.58|6.48|-4.9	0	.
chr4	153473999	153485999	DB_Ctrl_dev_H3K27me3_P39_vs_E14_down_590|-0.01|7.35|-7.36	0	.
chr9	54697999	54705199	DB_Ctrl_dev_H3K27me3_P39_vs_E14_down_591|2.16|6.46|-4.3	0	.
chr11	119031799	119040399	DB_Ctrl_dev_H3K27me3_P39_vs_E14_down_592|5.39|7.44|-2.05	0	.
chr1	34747999	34755399	DB_Ctrl_dev_H3K27me3_P39_vs_E14_down_593|1.97|6.5|-4.53	0	.
chr7	99620599	99633199	DB_Ctrl_dev_H3K27me3_P39_vs_E14_down_596|5.81|7.65|-1.84	0	.
chr13	100548399	100557999	DB_Ctrl_dev_H3K27me3_P39_vs_E14_down_597|5.87|7.67|-1.8	0	.
chr9	20690199	20696199	DB_Ctrl_dev_H3K27me3_P39_vs_E14_down_598|2.45|6.5|-4.04	0	.
chr14	70550399	70562199	DB_Ctrl_dev_H3K27me3_P39_vs_E14_down_599|-0.01|7.33|-7.35	0	.
chr4	144889399	144897799	DB_Ctrl_dev_H3K27me3_P39_vs_E14_down_600|4.04|7.01|-2.97	0	.
chr2	31630199	31667999	DB_Ctrl_dev_H3K27me3_P39_vs_E14_down_601|8.79|9.73|-0.94	0	.
chr2	127332999	127341399	DB_Ctrl_dev_H3K27me3_P39_vs_E14_down_602|3.74|6.75|-3.01	0	.
chr11	103099599	103105999	DB_Ctrl_dev_H3K27me3_P39_vs_E14_down_603|1.79|6.47|-4.68	0	.
chr13	105442599	105447599	DB_Ctrl_dev_H3K27me3_P39_vs_E14_down_604|1.58|6.47|-4.89	0	.
chr17	34658199	34679199	DB_Ctrl_dev_H3K27me3_P39_vs_E14_down_605|7.21|8.49|-1.28	0	.
chr4	129246399	129252399	DB_Ctrl_dev_H3K27me3_P39_vs_E14_down_606|4.77|7.12|-2.35	0	.
chr19	42144799	42151999	DB_Ctrl_dev_H3K27me3_P39_vs_E14_down_607|0.58|6.79|-6.22	0	.
chr5	113328199	113351199	DB_Ctrl_dev_H3K27me3_P39_vs_E14_down_608|7.34|8.6|-1.26	0	.
chr10	127338799	127343999	DB_Ctrl_dev_H3K27me3_P39_vs_E14_down_609|4.63|7.07|-2.44	0	.
chr5	100838799	100849199	DB_Ctrl_dev_H3K27me3_P39_vs_E14_down_610|4.72|7.13|-2.42	0	.
chr6	99689799	99698799	DB_Ctrl_dev_H3K27me3_P39_vs_E14_down_611|3.16|6.58|-3.42	0	.
chr3	152260599	152270399	DB_Ctrl_dev_H3K27me3_P39_vs_E14_down_612|4.99|7.27|-2.28	0	.
chr11	74583799	74594999	DB_Ctrl_dev_H3K27me3_P39_vs_E14_down_613|-0.01|7.29|-7.3	0	.
chr11	12461999	12467399	DB_Ctrl_dev_H3K27me3_P39_vs_E14_down_614|1.8|6.43|-4.63	0	.
chr6	96175399	96195599	DB_Ctrl_dev_H3K27me3_P39_vs_E14_down_615|6.05|7.76|-1.71	0	.
chr1	175419999	175437799	DB_Ctrl_dev_H3K27me3_P39_vs_E14_down_617|4.38|6.95|-2.58	0	.
chr6	83057399	83077599	DB_Ctrl_dev_H3K27me3_P39_vs_E14_down_618|8.18|9.31|-1.13	0	.
chr9	75229999	75234999	DB_Ctrl_dev_H3K27me3_P39_vs_E14_down_619|3.16|6.59|-3.43	0	.
chr11	82383199	82393199	DB_Ctrl_dev_H3K27me3_P39_vs_E14_down_620|5.77|7.65|-1.88	0	.
chr13	78159799	78166799	DB_Ctrl_dev_H3K27me3_P39_vs_E14_down_621|3.38|6.65|-3.27	0	.
chr1	89751399	89758599	DB_Ctrl_dev_H3K27me3_P39_vs_E14_down_622|0.58|6.77|-6.19	0	.
chr4	43517599	43526999	DB_Ctrl_dev_H3K27me3_P39_vs_E14_down_623|5.97|7.72|-1.74	0	.
chr13	35736999	35742399	DB_Ctrl_dev_H3K27me3_P39_vs_E14_down_624|3.57|6.67|-3.1	0	.
chr15	31294999	31300399	DB_Ctrl_dev_H3K27me3_P39_vs_E14_down_625|0.99|6.56|-5.57	0	.
chr13	69486199	69493399	DB_Ctrl_dev_H3K27me3_P39_vs_E14_down_626|1.32|6.46|-5.14	0	.
chr17	44391799	44409599	DB_Ctrl_dev_H3K27me3_P39_vs_E14_down_627|6.25|7.87|-1.62	0	.
chr7	44838399	44843799	DB_Ctrl_dev_H3K27me3_P39_vs_E14_down_628|0.98|6.55|-5.57	0	.
chr2	28903999	28926999	DB_Ctrl_dev_H3K27me3_P39_vs_E14_down_629|8.49|9.52|-1.03	0	.
chr1	105777999	105783999	DB_Ctrl_dev_H3K27me3_P39_vs_E14_down_631|1.97|6.44|-4.46	0	.
chr2	35578999	35586199	DB_Ctrl_dev_H3K27me3_P39_vs_E14_down_632|4.77|7.12|-2.36	0	.
chr11	84513799	84564799	DB_Ctrl_dev_H3K27me3_P39_vs_E14_down_633|9.47|10.26|-0.79	0	.
chr15	99575999	99595999	DB_Ctrl_dev_H3K27me3_P39_vs_E14_down_634|7.58|8.86|-1.28	0	.
chr19	36343999	36349799	DB_Ctrl_dev_H3K27me3_P39_vs_E14_down_635|3.23|6.58|-3.35	0	.
chr19	4468799	4482999	DB_Ctrl_dev_H3K27me3_P39_vs_E14_down_636|-0.01|7.24|-7.25	0	.
chr11	35793199	35802399	DB_Ctrl_dev_H3K27me3_P39_vs_E14_down_637|-0.01|7.24|-7.25	0	.
chr2	118883999	118900999	DB_Ctrl_dev_H3K27me3_P39_vs_E14_down_638|6.35|8.05|-1.7	0	.
chr3	141584599	141596399	DB_Ctrl_dev_H3K27me3_P39_vs_E14_down_639|3.45|6.62|-3.18	0	.
chr15	74524999	74535399	DB_Ctrl_dev_H3K27me3_P39_vs_E14_down_641|-0.01|7.22|-7.24	0	.
chr7	98172599	98187199	DB_Ctrl_dev_H3K27me3_P39_vs_E14_down_642|4.15|7|-2.85	0	.
chr4	108214199	108222199	DB_Ctrl_dev_H3K27me3_P39_vs_E14_down_643|5.52|7.48|-1.96	0	.
chr2	152934999	152947599	DB_Ctrl_dev_H3K27me3_P39_vs_E14_down_644|5.96|7.88|-1.92	0	.
chr19	46754199	46765199	DB_Ctrl_dev_H3K27me3_P39_vs_E14_down_645|4.57|7.02|-2.45	0	.
chr10	121305999	121316399	DB_Ctrl_dev_H3K27me3_P39_vs_E14_down_647|0.58|6.72|-6.15	0	.
chr9	44079999	44090199	DB_Ctrl_dev_H3K27me3_P39_vs_E14_down_648|-0.01|7.21|-7.22	0	.
chr15	102247599	102264199	DB_Ctrl_dev_H3K27me3_P39_vs_E14_down_649|-0.01|7.21|-7.22	0	.
chr5	24472599	24476799	DB_Ctrl_dev_H3K27me3_P39_vs_E14_down_650|-0.01|7.24|-7.26	0	.
chr14	46623399	46666799	DB_Ctrl_dev_H3K27me3_P39_vs_E14_down_651|8.23|9.22|-0.99	0	.
chr15	98167799	98175999	DB_Ctrl_dev_H3K27me3_P39_vs_E14_down_652|-0.01|7.2|-7.22	0	.
chr17	26199199	26210599	DB_Ctrl_dev_H3K27me3_P39_vs_E14_down_653|-0.01|7.2|-7.21	0	.
chr2	149828999	149833599	DB_Ctrl_dev_H3K27me3_P39_vs_E14_down_655|3.63|6.65|-3.02	0	.
chr15	54568399	54573399	DB_Ctrl_dev_H3K27me3_P39_vs_E14_down_656|1.56|6.39|-4.82	0	.
chr5	67422999	67428599	DB_Ctrl_dev_H3K27me3_P39_vs_E14_down_657|0.58|6.7|-6.13	0	.
chr6	127764599	127774599	DB_Ctrl_dev_H3K27me3_P39_vs_E14_down_658|-0.01|7.18|-7.2	0	.
chr8	102782599	102788999	DB_Ctrl_dev_H3K27me3_P39_vs_E14_down_659|2.31|6.38|-4.07	0	.
chr2	90883999	90894199	DB_Ctrl_dev_H3K27me3_P39_vs_E14_down_660|-0.01|7.17|-7.19	0	.
chr6	88181399	88210599	DB_Ctrl_dev_H3K27me3_P39_vs_E14_down_661|8.89|9.93|-1.03	0	.
chr5	107281399	107293799	DB_Ctrl_dev_H3K27me3_P39_vs_E14_down_662|5.27|7.35|-2.08	0	.
chr12	24678799	24684999	DB_Ctrl_dev_H3K27me3_P39_vs_E14_down_665|3.44|6.59|-3.14	0	.
chr6	52817599	52824199	DB_Ctrl_dev_H3K27me3_P39_vs_E14_down_666|2.79|6.44|-3.65	0	.
chr9	21179399	21187799	DB_Ctrl_dev_H3K27me3_P39_vs_E14_down_667|4.16|6.86|-2.7	0	.
chr14	32453399	32471599	DB_Ctrl_dev_H3K27me3_P39_vs_E14_down_668|7.8|8.9|-1.1	0	.
chr15	89373599	89389399	DB_Ctrl_dev_H3K27me3_P39_vs_E14_down_669|6.41|7.95|-1.54	0	.
chr4	154074399	154089399	DB_Ctrl_dev_H3K27me3_P39_vs_E14_down_670|5.8|7.63|-1.83	0	.
chr6	122740199	122748999	DB_Ctrl_dev_H3K27me3_P39_vs_E14_down_671|3.63|6.64|-3.01	0	.
chr15	89495799	89500999	DB_Ctrl_dev_H3K27me3_P39_vs_E14_down_672|0.98|6.48|-5.5	0	.
chr15	25439599	25452399	DB_Ctrl_dev_H3K27me3_P39_vs_E14_down_673|3.69|6.69|-3.01	0	.
chr4	152001999	152011399	DB_Ctrl_dev_H3K27me3_P39_vs_E14_down_674|-0.01|7.14|-7.15	0	.
chr10	81360999	81366999	DB_Ctrl_dev_H3K27me3_P39_vs_E14_down_675|-0.01|7.14|-7.16	0	.
chr13	37823999	37833799	DB_Ctrl_dev_H3K27me3_P39_vs_E14_down_676|5.61|7.66|-2.05	0	.
chr9	70136799	70144599	DB_Ctrl_dev_H3K27me3_P39_vs_E14_down_677|2.17|6.39|-4.22	0	.
chr10	67549999	67580599	DB_Ctrl_dev_H3K27me3_P39_vs_E14_down_678|7.72|8.85|-1.13	0	.
chr2	163913999	163923799	DB_Ctrl_dev_H3K27me3_P39_vs_E14_down_679|-0.01|7.13|-7.14	0	.
chr4	129489399	129493399	DB_Ctrl_dev_H3K27me3_P39_vs_E14_down_680|1.58|6.35|-4.77	0	.
chr7	120194399	120204999	DB_Ctrl_dev_H3K27me3_P39_vs_E14_down_681|5.05|7.21|-2.16	0	.
chr12	117529399	117537399	DB_Ctrl_dev_H3K27me3_P39_vs_E14_down_682|-0.01|7.12|-7.13	0	.
chr9	122636799	122647799	DB_Ctrl_dev_H3K27me3_P39_vs_E14_down_683|-0.01|7.12|-7.14	0	.
chr2	91920599	91925399	DB_Ctrl_dev_H3K27me3_P39_vs_E14_down_684|-0.01|7.11|-7.13	0	.
chr3	97677399	97685599	DB_Ctrl_dev_H3K27me3_P39_vs_E14_down_685|3.37|6.59|-3.21	0	.
chr6	39114399	39120599	DB_Ctrl_dev_H3K27me3_P39_vs_E14_down_686|5.27|7.37|-2.09	0	.
chr7	128413599	128421199	DB_Ctrl_dev_H3K27me3_P39_vs_E14_down_687|5.56|7.45|-1.9	0	.
chr6	28128399	28140599	DB_Ctrl_dev_H3K27me3_P39_vs_E14_down_688|4.42|7.01|-2.59	0	.
chr8	111382799	111405999	DB_Ctrl_dev_H3K27me3_P39_vs_E14_down_689|6.59|8.05|-1.46	0	.
chr7	31123799	31129599	DB_Ctrl_dev_H3K27me3_P39_vs_E14_down_690|-0.01|7.1|-7.11	0	.
chr2	164990599	164999999	DB_Ctrl_dev_H3K27me3_P39_vs_E14_down_692|-0.01|7.09|-7.11	0	.
chr17	8797399	8802999	DB_Ctrl_dev_H3K27me3_P39_vs_E14_down_693|-0.01|7.09|-7.11	0	.
chr15	84103399	84115199	DB_Ctrl_dev_H3K27me3_P39_vs_E14_down_695|2.98|6.44|-3.45	0	.
chr9	21007199	21023199	DB_Ctrl_dev_H3K27me3_P39_vs_E14_down_696|6.47|7.98|-1.51	0	.
chr7	139545399	139552799	DB_Ctrl_dev_H3K27me3_P39_vs_E14_down_697|1.58|6.33|-4.75	0	.
chr14	66906399	66913399	DB_Ctrl_dev_H3K27me3_P39_vs_E14_down_698|-0.01|7.08|-7.1	0	.
chr6	85482399	85487199	DB_Ctrl_dev_H3K27me3_P39_vs_E14_down_699|-0.01|7.12|-7.13	0	.
chr14	70620399	70629999	DB_Ctrl_dev_H3K27me3_P39_vs_E14_down_700|-0.01|7.08|-7.1	0	.
chr7	45696799	45703399	DB_Ctrl_dev_H3K27me3_P39_vs_E14_down_701|0.57|6.62|-6.05	0	.
chr11	69419199	69423199	DB_Ctrl_dev_H3K27me3_P39_vs_E14_down_702|1.56|6.32|-4.76	0	.
chr15	100628599	100639399	DB_Ctrl_dev_H3K27me3_P39_vs_E14_down_703|6.25|7.85|-1.59	0	.
chr7	142651199	142668599	DB_Ctrl_dev_H3K27me3_P39_vs_E14_down_704|8.02|9.16|-1.14	0	.
chr2	91969399	91977399	DB_Ctrl_dev_H3K27me3_P39_vs_E14_down_705|-0.01|7.08|-7.09	0	.
chr11	103187599	103200199	DB_Ctrl_dev_H3K27me3_P39_vs_E14_down_706|-0.01|7.08|-7.1	0	.
chr17	25712399	25719399	DB_Ctrl_dev_H3K27me3_P39_vs_E14_down_708|3.74|6.69|-2.95	0	.
chr2	25873399	25879599	DB_Ctrl_dev_H3K27me3_P39_vs_E14_down_709|3.15|6.47|-3.32	0	.
chr6	30951199	30967799	DB_Ctrl_dev_H3K27me3_P39_vs_E14_down_710|7.2|8.49|-1.29	0	.
chr17	29090399	29097399	DB_Ctrl_dev_H3K27me3_P39_vs_E14_down_711|0.58|6.61|-6.03	0	.
chr6	114396999	114400999	DB_Ctrl_dev_H3K27me3_P39_vs_E14_down_713|2.98|6.47|-3.49	0	.
chr7	46394199	46401399	DB_Ctrl_dev_H3K27me3_P39_vs_E14_down_714|-0.01|7.06|-7.08	0	.
chr18	4349999	4356999	DB_Ctrl_dev_H3K27me3_P39_vs_E14_down_715|1.58|6.32|-4.74	0	.
chr9	21984799	21995999	DB_Ctrl_dev_H3K27me3_P39_vs_E14_down_716|6.6|8.17|-1.57	0	.
chr11	119079199	119084599	DB_Ctrl_dev_H3K27me3_P39_vs_E14_down_717|2.16|6.29|-4.14	0	.
chr4	148171799	148186399	DB_Ctrl_dev_H3K27me3_P39_vs_E14_down_718|6.1|7.78|-1.69	0	.
chr12	82615999	82621199	DB_Ctrl_dev_H3K27me3_P39_vs_E14_down_719|3.84|6.75|-2.91	0	.
chr5	142528799	142536599	DB_Ctrl_dev_H3K27me3_P39_vs_E14_down_720|3.31|6.51|-3.2	0	.
chr17	23737399	23751199	DB_Ctrl_dev_H3K27me3_P39_vs_E14_down_721|6.95|8.3|-1.35	0	.
chr8	71542999	71568999	DB_Ctrl_dev_H3K27me3_P39_vs_E14_down_722|7|8.51|-1.51	0	.
chr4	130136799	130150399	DB_Ctrl_dev_H3K27me3_P39_vs_E14_down_723|5.63|7.51|-1.88	0	.
chr2	121354599	121362599	DB_Ctrl_dev_H3K27me3_P39_vs_E14_down_725|1.32|6.33|-5.02	0	.
chr14	30167199	30178599	DB_Ctrl_dev_H3K27me3_P39_vs_E14_down_726|2.89|6.39|-3.49	0	.
chr11	81966399	81974999	DB_Ctrl_dev_H3K27me3_P39_vs_E14_down_727|1.97|6.31|-4.34	0	.
chr4	49841199	49849399	DB_Ctrl_dev_H3K27me3_P39_vs_E14_down_728|5.21|7.26|-2.05	0	.
chr7	139890599	139897999	DB_Ctrl_dev_H3K27me3_P39_vs_E14_down_729|2|6.32|-4.32	0	.
chr17	25568199	25575399	DB_Ctrl_dev_H3K27me3_P39_vs_E14_down_730|3.74|6.64|-2.9	0	.
chr3	84474999	84482999	DB_Ctrl_dev_H3K27me3_P39_vs_E14_down_731|5.66|7.49|-1.83	0	.
chr19	47339599	47347399	DB_Ctrl_dev_H3K27me3_P39_vs_E14_down_733|4.66|7|-2.34	0	.
chr5	119647999	119694199	DB_Ctrl_dev_H3K27me3_P39_vs_E14_down_736|9.68|10.48|-0.8	0	.
chr7	3413599	3417199	DB_Ctrl_dev_H3K27me3_P39_vs_E14_down_737|1.79|6.25|-4.46	0	.
chr15	34833599	34840399	DB_Ctrl_dev_H3K27me3_P39_vs_E14_down_738|-0.01|7|-7.02	0	.
chr5	125529999	125536999	DB_Ctrl_dev_H3K27me3_P39_vs_E14_down_739|-0.01|7|-7.01	0	.
chr12	85469799	85476999	DB_Ctrl_dev_H3K27me3_P39_vs_E14_down_740|3.99|6.74|-2.75	0	.
chr11	94879399	94889199	DB_Ctrl_dev_H3K27me3_P39_vs_E14_down_741|5.63|7.46|-1.83	0	.
chr2	27138199	27143799	DB_Ctrl_dev_H3K27me3_P39_vs_E14_down_742|2.45|6.31|-3.86	0	.
chr8	105611199	105618599	DB_Ctrl_dev_H3K27me3_P39_vs_E14_down_744|-0.01|6.99|-7.01	0	.
chr5	139320599	139330199	DB_Ctrl_dev_H3K27me3_P39_vs_E14_down_745|-0.01|6.99|-7.01	0	.
chr17	70817199	70820999	DB_Ctrl_dev_H3K27me3_P39_vs_E14_down_746|1.79|6.24|-4.45	0	.
chr15	101265999	101280399	DB_Ctrl_dev_H3K27me3_P39_vs_E14_down_748|-0.01|6.99|-7.01	0	.
chr17	14273799	14283199	DB_Ctrl_dev_H3K27me3_P39_vs_E14_down_749|5.63|7.52|-1.89	0	.
chr3	89314199	89323399	DB_Ctrl_dev_H3K27me3_P39_vs_E14_down_750|-0.01|6.99|-7	0	.
chr6	90453999	90464999	DB_Ctrl_dev_H3K27me3_P39_vs_E14_down_751|4.12|6.94|-2.82	0	.
chr9	95558199	95562599	DB_Ctrl_dev_H3K27me3_P39_vs_E14_down_752|2.98|6.49|-3.51	0	.
chr19	5647999	5656999	DB_Ctrl_dev_H3K27me3_P39_vs_E14_down_753|3.93|6.78|-2.84	0	.
chr19	44707799	44778199	DB_Ctrl_dev_H3K27me3_P39_vs_E14_down_755|10.1|10.87|-0.77	0	.
chr1	156298999	156306599	DB_Ctrl_dev_H3K27me3_P39_vs_E14_down_756|3.94|6.72|-2.78	0	.
chr7	45793399	45799399	DB_Ctrl_dev_H3K27me3_P39_vs_E14_down_757|1.97|6.3|-4.32	0	.
chr8	35585799	35591199	DB_Ctrl_dev_H3K27me3_P39_vs_E14_down_758|1.58|6.28|-4.7	0	.
chr10	115454399	115484799	DB_Ctrl_dev_H3K27me3_P39_vs_E14_down_759|7.93|8.98|-1.05	0	.
chr2	180017999	180024799	DB_Ctrl_dev_H3K27me3_P39_vs_E14_down_760|4.03|6.72|-2.69	0	.
chr2	181132599	181141999	DB_Ctrl_dev_H3K27me3_P39_vs_E14_down_761|-0.01|6.97|-6.99	0	.
chr2	148393199	148399199	DB_Ctrl_dev_H3K27me3_P39_vs_E14_down_762|2.17|6.32|-4.16	0	.
chr15	102240199	102246399	DB_Ctrl_dev_H3K27me3_P39_vs_E14_down_763|2.44|6.3|-3.86	0	.
chr8	84976799	84983599	DB_Ctrl_dev_H3K27me3_P39_vs_E14_down_764|-0.01|6.97|-6.98	0	.
chr7	18989199	18995799	DB_Ctrl_dev_H3K27me3_P39_vs_E14_down_765|1.57|6.24|-4.67	0	.
chr1	54189199	54196599	DB_Ctrl_dev_H3K27me3_P39_vs_E14_down_766|2.31|6.28|-3.97	0	.
chr12	117194199	117209799	DB_Ctrl_dev_H3K27me3_P39_vs_E14_down_767|-0.01|6.96|-6.98	0	.
chr13	76382599	76385599	DB_Ctrl_dev_H3K27me3_P39_vs_E14_down_768|2.45|6.28|-3.84	0	.
chr11	69119199	69123199	DB_Ctrl_dev_H3K27me3_P39_vs_E14_down_769|2.31|6.26|-3.95	0	.
chr4	127221399	127226999	DB_Ctrl_dev_H3K27me3_P39_vs_E14_down_770|2.9|6.39|-3.49	0	.
chr9	64383199	64391999	DB_Ctrl_dev_H3K27me3_P39_vs_E14_down_771|5.36|7.34|-1.98	0	.
chr11	100566599	100577599	DB_Ctrl_dev_H3K27me3_P39_vs_E14_down_772|3.07|6.4|-3.33	0	.
chr4	46860799	46874599	DB_Ctrl_dev_H3K27me3_P39_vs_E14_down_773|-0.01|6.96|-6.97	0	.
chr8	120227399	120240199	DB_Ctrl_dev_H3K27me3_P39_vs_E14_down_774|5.6|7.45|-1.85	0	.
chr15	43165399	43173399	DB_Ctrl_dev_H3K27me3_P39_vs_E14_down_775|4.68|7.08|-2.4	0	.
chr11	75649599	75658399	DB_Ctrl_dev_H3K27me3_P39_vs_E14_down_776|-0.01|6.95|-6.96	0	.
chr11	69152399	69158399	DB_Ctrl_dev_H3K27me3_P39_vs_E14_down_777|2.56|6.33|-3.77	0	.
chr5	30620599	30624999	DB_Ctrl_dev_H3K27me3_P39_vs_E14_down_778|-0.01|6.94|-6.96	0	.
chr14	24000199	24008399	DB_Ctrl_dev_H3K27me3_P39_vs_E14_down_779|-0.01|6.94|-6.96	0	.
chr7	4787399	4793799	DB_Ctrl_dev_H3K27me3_P39_vs_E14_down_780|2.57|6.3|-3.73	0	.
chr5	37024599	37031999	DB_Ctrl_dev_H3K27me3_P39_vs_E14_down_781|4.2|6.99|-2.79	0	.
chr11	100962399	100985799	DB_Ctrl_dev_H3K27me3_P39_vs_E14_down_782|7.28|8.48|-1.2	0	.
chr14	118700599	118709199	DB_Ctrl_dev_H3K27me3_P39_vs_E14_down_783|2.14|6.3|-4.15	0	.
chr1	184881199	184885199	DB_Ctrl_dev_H3K27me3_P39_vs_E14_down_784|3.5|6.65|-3.15	0	.
chr5	137287199	137293199	DB_Ctrl_dev_H3K27me3_P39_vs_E14_down_785|-0.01|6.94|-6.96	0	.
chr8	94690999	94699399	DB_Ctrl_dev_H3K27me3_P39_vs_E14_down_786|5.69|7.5|-1.81	0	.
chr6	83159999	83165399	DB_Ctrl_dev_H3K27me3_P39_vs_E14_down_787|-0.01|6.93|-6.95	0	.
chr8	123233399	123239599	DB_Ctrl_dev_H3K27me3_P39_vs_E14_down_788|-0.01|6.93|-6.94	0	.
chr1	135907599	135924399	DB_Ctrl_dev_H3K27me3_P39_vs_E14_down_789|6.8|8.16|-1.36	0	.
chr9	56725399	56737999	DB_Ctrl_dev_H3K27me3_P39_vs_E14_down_790|-0.01|6.93|-6.94	0	.
chr7	29228599	29236199	DB_Ctrl_dev_H3K27me3_P39_vs_E14_down_791|5.12|7.18|-2.07	0	.
chr8	66695199	66700799	DB_Ctrl_dev_H3K27me3_P39_vs_E14_down_792|1.79|6.22|-4.43	0	.
chr3	97884199	97893799	DB_Ctrl_dev_H3K27me3_P39_vs_E14_down_793|1.78|6.24|-4.46	0	.
chr13	76052599	76059999	DB_Ctrl_dev_H3K27me3_P39_vs_E14_down_794|-0.01|6.92|-6.94	0	.
chr14	28376599	28387799	DB_Ctrl_dev_H3K27me3_P39_vs_E14_down_795|-0.01|6.92|-6.94	0	.
chr11	82430199	82438199	DB_Ctrl_dev_H3K27me3_P39_vs_E14_down_796|5.33|7.32|-1.99	0	.
chr7	81856399	81863599	DB_Ctrl_dev_H3K27me3_P39_vs_E14_down_797|2|6.26|-4.26	0	.
chr3	152662999	152671399	DB_Ctrl_dev_H3K27me3_P39_vs_E14_down_798|-0.01|6.93|-6.94	0	.
chr4	46893599	46907199	DB_Ctrl_dev_H3K27me3_P39_vs_E14_down_800|-0.01|6.91|-6.92	0	.
chr2	180636399	180649399	DB_Ctrl_dev_H3K27me3_P39_vs_E14_down_801|5.98|7.64|-1.66	0	.
chr12	112677399	112683999	DB_Ctrl_dev_H3K27me3_P39_vs_E14_down_802|5.07|7.17|-2.1	0	.
chr13	54788399	54792999	DB_Ctrl_dev_H3K27me3_P39_vs_E14_down_803|1.97|6.25|-4.28	0	.
chr4	46849399	46859999	DB_Ctrl_dev_H3K27me3_P39_vs_E14_down_804|-0.01|6.91|-6.92	0	.
chr13	98344599	98376999	DB_Ctrl_dev_H3K27me3_P39_vs_E14_down_805|8.95|9.83|-0.88	0	.
chr13	54759599	54767199	DB_Ctrl_dev_H3K27me3_P39_vs_E14_down_806|-0.01|6.9|-6.92	0	.
chr10	73093799	73102799	DB_Ctrl_dev_H3K27me3_P39_vs_E14_down_807|4.69|6.99|-2.3	0	.
chr15	99082199	99106599	DB_Ctrl_dev_H3K27me3_P39_vs_E14_down_808|8.16|9.13|-0.97	0	.
chr1	57597199	57615599	DB_Ctrl_dev_H3K27me3_P39_vs_E14_down_809|6.17|7.78|-1.6	0	.
chr19	4099199	4102999	DB_Ctrl_dev_H3K27me3_P39_vs_E14_down_810|0.58|6.46|-5.88	0	.
chr5	37088599	37093599	DB_Ctrl_dev_H3K27me3_P39_vs_E14_down_811|1.32|6.24|-4.92	0	.
chr10	79985999	79993399	DB_Ctrl_dev_H3K27me3_P39_vs_E14_down_812|6.01|7.67|-1.66	0	.
chr15	38468999	38473799	DB_Ctrl_dev_H3K27me3_P39_vs_E14_down_813|-0.01|6.88|-6.89	0	.
chr9	59575599	59584599	DB_Ctrl_dev_H3K27me3_P39_vs_E14_down_815|1.32|6.23|-4.91	0	.
chr13	47191399	47200999	DB_Ctrl_dev_H3K27me3_P39_vs_E14_down_817|3.24|6.47|-3.24	0	.
chr10	80000799	80006399	DB_Ctrl_dev_H3K27me3_P39_vs_E14_down_819|3.07|6.41|-3.35	0	.
chr2	143542399	143550199	DB_Ctrl_dev_H3K27me3_P39_vs_E14_down_820|-0.01|6.89|-6.91	0	.
chr19	45221399	45250199	DB_Ctrl_dev_H3K27me3_P39_vs_E14_down_821|9.19|10.09|-0.9	0	.
chr18	36191199	36200999	DB_Ctrl_dev_H3K27me3_P39_vs_E14_down_823|1.3|6.22|-4.92	0	.
chr17	57269399	57277399	DB_Ctrl_dev_H3K27me3_P39_vs_E14_down_824|3.16|6.43|-3.27	0	.
chr2	11551199	11557199	DB_Ctrl_dev_H3K27me3_P39_vs_E14_down_826|3.74|6.6|-2.86	0	.
chr1	24582799	24589199	DB_Ctrl_dev_H3K27me3_P39_vs_E14_down_827|4.38|6.84|-2.46	0	.
chr4	151407399	151416799	DB_Ctrl_dev_H3K27me3_P39_vs_E14_down_828|3.23|6.42|-3.19	0	.
chr8	70370999	70379999	DB_Ctrl_dev_H3K27me3_P39_vs_E14_down_829|7.43|8.67|-1.23	0	.
chr6	110644599	110650799	DB_Ctrl_dev_H3K27me3_P39_vs_E14_down_830|-0.01|6.84|-6.85	0	.
chr1	124041799	124048799	DB_Ctrl_dev_H3K27me3_P39_vs_E14_down_831|1.8|6.2|-4.4	0	.
chr7	16944799	16950199	DB_Ctrl_dev_H3K27me3_P39_vs_E14_down_832|-0.01|6.83|-6.85	0	.
chr4	127985799	127993999	DB_Ctrl_dev_H3K27me3_P39_vs_E14_down_833|-0.01|6.84|-6.85	0	.
chr1	180185999	180195599	DB_Ctrl_dev_H3K27me3_P39_vs_E14_down_834|3.23|6.47|-3.24	0	.
chr4	57138599	57142999	DB_Ctrl_dev_H3K27me3_P39_vs_E14_down_835|-0.01|6.84|-6.85	0	.
chr10	81015999	81026199	DB_Ctrl_dev_H3K27me3_P39_vs_E14_down_836|-0.01|6.83|-6.84	0	.
chr16	93674399	93686199	DB_Ctrl_dev_H3K27me3_P39_vs_E14_down_837|6.31|7.86|-1.55	0	.
chr2	109691599	109698399	DB_Ctrl_dev_H3K27me3_P39_vs_E14_down_838|4.68|7.16|-2.49	0	.
chr3	141459799	141468599	DB_Ctrl_dev_H3K27me3_P39_vs_E14_down_839|4.51|6.93|-2.41	0	.
chr8	71504599	71512399	DB_Ctrl_dev_H3K27me3_P39_vs_E14_down_840|4.35|7.03|-2.68	0	.
chr7	45331999	45344199	DB_Ctrl_dev_H3K27me3_P39_vs_E14_down_841|-0.01|6.82|-6.83	0	.
chr3	68866599	68872399	DB_Ctrl_dev_H3K27me3_P39_vs_E14_down_842|0.57|6.45|-5.88	0	.
chr9	32657199	32697799	DB_Ctrl_dev_H3K27me3_P39_vs_E14_down_843|8.32|9.23|-0.92	0	.
chr4	152136799	152143999	DB_Ctrl_dev_H3K27me3_P39_vs_E14_down_844|2.45|6.22|-3.77	0	.
chr18	34861399	34869999	DB_Ctrl_dev_H3K27me3_P39_vs_E14_down_845|-0.01|6.82|-6.83	0	.
chr16	20488999	20499599	DB_Ctrl_dev_H3K27me3_P39_vs_E14_down_847|3.06|6.46|-3.4	0	.
chr1	131240399	131246199	DB_Ctrl_dev_H3K27me3_P39_vs_E14_down_848|-0.01|6.81|-6.82	0	.
chr7	126078799	126085599	DB_Ctrl_dev_H3K27me3_P39_vs_E14_down_849|3.99|6.66|-2.67	0	.
chr11	95068399	95081199	DB_Ctrl_dev_H3K27me3_P39_vs_E14_down_851|5.4|7.32|-1.93	0	.
chr1	74301599	74306599	DB_Ctrl_dev_H3K27me3_P39_vs_E14_down_852|1.78|6.21|-4.43	0	.
chr15	99652399	99659399	DB_Ctrl_dev_H3K27me3_P39_vs_E14_down_853|1.56|6.26|-4.7	0	.
chr9	65389199	65394799	DB_Ctrl_dev_H3K27me3_P39_vs_E14_down_854|5.05|7.16|-2.12	0	.
chr9	63133199	63159599	DB_Ctrl_dev_H3K27me3_P39_vs_E14_down_855|9.22|10.1|-0.88	0	.
chr19	6919599	6936799	DB_Ctrl_dev_H3K27me3_P39_vs_E14_down_856|2.3|8.94|-6.64	0	.
chr4	149760599	149785999	DB_Ctrl_dev_H3K27me3_P39_vs_E14_down_857|4.79|8.29|-3.5	0	.
chr17	87281199	87294799	DB_Ctrl_dev_H3K27me3_P39_vs_E14_down_858|5.57|7.42|-1.85	0	.
chr19	5549399	5565999	DB_Ctrl_dev_H3K27me3_P39_vs_E14_down_860|7.13|8.39|-1.26	0	.
chrX	101381399	101386799	DB_Ctrl_dev_H3K27me3_P39_vs_E14_down_861|2.14|6.23|-4.08	0	.
chr10	9673199	9679199	DB_Ctrl_dev_H3K27me3_P39_vs_E14_down_862|4.72|7.08|-2.36	0	.
chr8	35597399	35611399	DB_Ctrl_dev_H3K27me3_P39_vs_E14_down_863|-0.01|6.78|-6.8	0	.
chr10	58638599	58662599	DB_Ctrl_dev_H3K27me3_P39_vs_E14_down_866|6.6|8.09|-1.49	0	.
chr3	107095399	107104999	DB_Ctrl_dev_H3K27me3_P39_vs_E14_down_867|0.57|6.38|-5.81	0	.
chr4	43422199	43430399	DB_Ctrl_dev_H3K27me3_P39_vs_E14_down_869|-0.01|6.78|-6.8	0	.
chr15	90677599	90680999	DB_Ctrl_dev_H3K27me3_P39_vs_E14_down_870|1.58|6.16|-4.58	0	.
chr5	120413199	120443199	DB_Ctrl_dev_H3K27me3_P39_vs_E14_down_871|8.98|9.87|-0.89	0	.
chr18	25676599	25692399	DB_Ctrl_dev_H3K27me3_P39_vs_E14_down_872|-0.01|6.77|-6.79	0	.
chr11	103765999	103788599	DB_Ctrl_dev_H3K27me3_P39_vs_E14_down_873|7.71|8.79|-1.08	0	.
chr11	83417399	83424599	DB_Ctrl_dev_H3K27me3_P39_vs_E14_down_874|-0.01|6.77|-6.78	0	.
chr7	45163799	45170799	DB_Ctrl_dev_H3K27me3_P39_vs_E14_down_875|0.99|6.22|-5.23	0	.
chr5	74995799	75003999	DB_Ctrl_dev_H3K27me3_P39_vs_E14_down_876|1.3|6.18|-4.88	0	.
chr11	97544599	97553399	DB_Ctrl_dev_H3K27me3_P39_vs_E14_down_877|-0.01|6.77|-6.78	0	.
chr8	105289799	105296799	DB_Ctrl_dev_H3K27me3_P39_vs_E14_down_878|3.07|6.4|-3.34	0	.
chr12	86412399	86427199	DB_Ctrl_dev_H3K27me3_P39_vs_E14_down_879|6.65|8.12|-1.46	0	.
chr5	120691199	120698399	DB_Ctrl_dev_H3K27me3_P39_vs_E14_down_880|-0.01|6.76|-6.78	0	.
chr11	101954999	101969199	DB_Ctrl_dev_H3K27me3_P39_vs_E14_down_882|6.29|7.79|-1.5	0	.
chr6	83081999	83100599	DB_Ctrl_dev_H3K27me3_P39_vs_E14_down_883|7.53|8.64|-1.12	0	.
chr3	107574199	107605199	DB_Ctrl_dev_H3K27me3_P39_vs_E14_down_884|8.48|9.36|-0.88	0	.
chr2	180742399	180749799	DB_Ctrl_dev_H3K27me3_P39_vs_E14_down_885|3.31|6.41|-3.1	0	.
chr7	122287399	122294399	DB_Ctrl_dev_H3K27me3_P39_vs_E14_down_886|-0.01|6.75|-6.76	0	.
chr3	54153799	54159399	DB_Ctrl_dev_H3K27me3_P39_vs_E14_down_887|2.79|6.26|-3.46	0	.
chr6	119327999	119333399	DB_Ctrl_dev_H3K27me3_P39_vs_E14_down_888|2.44|6.19|-3.75	0	.
chr7	30340199	30352999	DB_Ctrl_dev_H3K27me3_P39_vs_E14_down_889|4.74|7.04|-2.3	0	.
chr10	21991199	21994999	DB_Ctrl_dev_H3K27me3_P39_vs_E14_down_890|0.57|6.35|-5.79	0	.
chr5	137642999	137652999	DB_Ctrl_dev_H3K27me3_P39_vs_E14_down_892|5.49|7.35|-1.86	0	.
chr7	120100199	120104399	DB_Ctrl_dev_H3K27me3_P39_vs_E14_down_893|1.58|6.12|-4.55	0	.
chr13	10354199	10362199	DB_Ctrl_dev_H3K27me3_P39_vs_E14_down_894|1.78|6.18|-4.4	0	.
chr6	89290599	89301599	DB_Ctrl_dev_H3K27me3_P39_vs_E14_down_895|3.74|6.55|-2.81	0	.
chr7	25813599	25818199	DB_Ctrl_dev_H3K27me3_P39_vs_E14_down_896|3.23|6.39|-3.16	0	.
chr17	24684799	24690999	DB_Ctrl_dev_H3K27me3_P39_vs_E14_down_898|1.3|6.15|-4.85	0	.
chr15	102893999	103078399	DB_Ctrl_dev_H3K27me3_P39_vs_E14_down_899|11.79|12.58|-0.78	0	.
chr19	45063599	45072199	DB_Ctrl_dev_H3K27me3_P39_vs_E14_down_900|5.78|7.53|-1.75	0	.
chr12	72826599	72837199	DB_Ctrl_dev_H3K27me3_P39_vs_E14_down_901|3.74|6.55|-2.8	0	.
chr2	163864799	163875199	DB_Ctrl_dev_H3K27me3_P39_vs_E14_down_902|3.45|6.44|-2.99	0	.
chr16	16212599	16218599	DB_Ctrl_dev_H3K27me3_P39_vs_E14_down_903|4.68|6.95|-2.27	0	.
chr5	24384799	24391199	DB_Ctrl_dev_H3K27me3_P39_vs_E14_down_904|4.03|6.67|-2.64	0	.
chr17	32112199	32115799	DB_Ctrl_dev_H3K27me3_P39_vs_E14_down_906|2.98|6.34|-3.35	0	.
chr6	84578399	84594199	DB_Ctrl_dev_H3K27me3_P39_vs_E14_down_907|7.53|8.7|-1.17	0	.
chr7	98187999	98197199	DB_Ctrl_dev_H3K27me3_P39_vs_E14_down_908|5.76|7.68|-1.92	0	.
chr11	119541199	119549999	DB_Ctrl_dev_H3K27me3_P39_vs_E14_down_909|-0.01|6.71|-6.73	0	.
chr15	98674799	98688999	DB_Ctrl_dev_H3K27me3_P39_vs_E14_down_910|-0.01|6.72|-6.73	0	.
chr4	101494199	101499999	DB_Ctrl_dev_H3K27me3_P39_vs_E14_down_911|-0.01|6.71|-6.72	0	.
chr11	98980999	98985799	DB_Ctrl_dev_H3K27me3_P39_vs_E14_down_912|2.79|6.24|-3.45	0	.
chr14	33349399	33356799	DB_Ctrl_dev_H3K27me3_P39_vs_E14_down_913|3.85|6.6|-2.75	0	.
chr6	124992999	125006199	DB_Ctrl_dev_H3K27me3_P39_vs_E14_down_914|-0.01|6.74|-6.76	0	.
chr11	67919999	67922799	DB_Ctrl_dev_H3K27me3_P39_vs_E14_down_915|1.99|6.12|-4.13	0	.
chr10	80839199	80848799	DB_Ctrl_dev_H3K27me3_P39_vs_E14_down_916|-0.01|6.7|-6.72	0	.
chr2	19651999	19662799	DB_Ctrl_dev_H3K27me3_P39_vs_E14_down_917|-0.01|6.71|-6.72	0	.
chr8	25032999	25045199	DB_Ctrl_dev_H3K27me3_P39_vs_E14_down_919|6.11|7.85|-1.74	0	.
chr15	76195599	76200999	DB_Ctrl_dev_H3K27me3_P39_vs_E14_down_920|-0.01|6.69|-6.71	0	.
chr17	23536799	23543599	DB_Ctrl_dev_H3K27me3_P39_vs_E14_down_921|4.69|6.93|-2.24	0	.
chr7	123976999	123989199	DB_Ctrl_dev_H3K27me3_P39_vs_E14_down_922|6.06|7.66|-1.6	0	.
chr7	101496199	101509399	DB_Ctrl_dev_H3K27me3_P39_vs_E14_down_923|-0.01|6.7|-6.72	0	.
chr2	163849199	163862799	DB_Ctrl_dev_H3K27me3_P39_vs_E14_down_924|6.74|8.14|-1.4	0	.
chr10	54071799	54078799	DB_Ctrl_dev_H3K27me3_P39_vs_E14_down_927|3.63|6.48|-2.85	0	.
chr9	29780599	29790799	DB_Ctrl_dev_H3K27me3_P39_vs_E14_down_928|3.94|6.61|-2.67	0	.
chr9	89904799	89916799	DB_Ctrl_dev_H3K27me3_P39_vs_E14_down_929|5.91|7.56|-1.65	0	.
chr2	144160399	144167799	DB_Ctrl_dev_H3K27me3_P39_vs_E14_down_930|-0.01|6.68|-6.69	0	.
chr9	97669799	97681399	DB_Ctrl_dev_H3K27me3_P39_vs_E14_down_931|3.99|6.61|-2.63	0	.
chr1	79853999	79863999	DB_Ctrl_dev_H3K27me3_P39_vs_E14_down_932|4.28|6.92|-2.65	0	.
chr5	147955399	147959399	DB_Ctrl_dev_H3K27me3_P39_vs_E14_down_933|2.57|6.19|-3.63	0	.
chr1	89668999	89678799	DB_Ctrl_dev_H3K27me3_P39_vs_E14_down_934|3.23|6.41|-3.19	0	.
chr11	103169599	103173999	DB_Ctrl_dev_H3K27me3_P39_vs_E14_down_936|-0.01|6.68|-6.69	0	.
chr2	166151399	166158399	DB_Ctrl_dev_H3K27me3_P39_vs_E14_down_937|4.08|6.67|-2.6	0	.
chr4	126295599	126308199	DB_Ctrl_dev_H3K27me3_P39_vs_E14_down_938|6.85|8.19|-1.34	0	.
chr7	113761999	113771399	DB_Ctrl_dev_H3K27me3_P39_vs_E14_down_939|5.49|7.32|-1.83	0	.
chr11	69951999	69969199	DB_Ctrl_dev_H3K27me3_P39_vs_E14_down_940|7.34|8.49|-1.14	0	.
chr5	147889399	147896399	DB_Ctrl_dev_H3K27me3_P39_vs_E14_down_941|2.14|6.17|-4.02	0	.
chr2	164398199	164412399	DB_Ctrl_dev_H3K27me3_P39_vs_E14_down_942|7.31|8.47|-1.16	0	.
chr6	119105399	119110399	DB_Ctrl_dev_H3K27me3_P39_vs_E14_down_943|0.98|6.15|-5.17	0	.
chr5	120646199	120653399	DB_Ctrl_dev_H3K27me3_P39_vs_E14_down_944|-0.01|6.66|-6.67	0	.
chr3	40947999	40952399	DB_Ctrl_dev_H3K27me3_P39_vs_E14_down_945|1.79|6.07|-4.27	0	.
chr7	47130999	47136999	DB_Ctrl_dev_H3K27me3_P39_vs_E14_down_947|1.56|6.09|-4.53	0	.
chr18	34538999	34553599	DB_Ctrl_dev_H3K27me3_P39_vs_E14_down_948|6.52|7.98|-1.46	0	.
chr15	74747199	74753999	DB_Ctrl_dev_H3K27me3_P39_vs_E14_down_949|1.56|6.1|-4.54	0	.
chr13	31795599	31826199	DB_Ctrl_dev_H3K27me3_P39_vs_E14_down_950|8.88|9.74|-0.86	0	.
chr16	17911599	17918199	DB_Ctrl_dev_H3K27me3_P39_vs_E14_down_951|6.35|7.86|-1.51	0	.
chr7	113207799	113211999	DB_Ctrl_dev_H3K27me3_P39_vs_E14_down_952|-0.01|6.64|-6.65	0	.
chr17	14200599	14205799	DB_Ctrl_dev_H3K27me3_P39_vs_E14_down_953|-0.01|6.64|-6.65	0	.
chr6	89002199	89015199	DB_Ctrl_dev_H3K27me3_P39_vs_E14_down_954|5.83|7.53|-1.7	0	.
chr12	109030999	109034999	DB_Ctrl_dev_H3K27me3_P39_vs_E14_down_955|2.8|6.22|-3.42	0	.
chr11	104231799	104238199	DB_Ctrl_dev_H3K27me3_P39_vs_E14_down_956|-0.01|6.63|-6.64	0	.
chr7	73738399	73743199	DB_Ctrl_dev_H3K27me3_P39_vs_E14_down_959|0.99|6.14|-5.15	0	.
chr9	44040199	44045999	DB_Ctrl_dev_H3K27me3_P39_vs_E14_down_960|-0.01|6.62|-6.64	0	.
chr14	69981599	69991599	DB_Ctrl_dev_H3K27me3_P39_vs_E14_down_961|3.69|6.52|-2.83	0	.
chr12	89808599	89816999	DB_Ctrl_dev_H3K27me3_P39_vs_E14_down_962|3.62|6.67|-3.05	0	.
chr5	113286799	113291799	DB_Ctrl_dev_H3K27me3_P39_vs_E14_down_965|-0.01|6.62|-6.63	0	.
chr4	138389999	138408999	DB_Ctrl_dev_H3K27me3_P39_vs_E14_down_966|3.75|8.3|-4.55	0	.
chr7	111304799	111316599	DB_Ctrl_dev_H3K27me3_P39_vs_E14_down_967|3.85|6.64|-2.79	0	.
chr9	31904799	31924199	DB_Ctrl_dev_H3K27me3_P39_vs_E14_down_968|7.71|8.75|-1.04	0	.
chr13	54945799	54956199	DB_Ctrl_dev_H3K27me3_P39_vs_E14_down_969|-0.01|6.62|-6.63	0	.
chr7	16055999	16064399	DB_Ctrl_dev_H3K27me3_P39_vs_E14_down_970|3.56|6.51|-2.94	0	.
chr1	132137599	132144399	DB_Ctrl_dev_H3K27me3_P39_vs_E14_down_971|-0.01|6.62|-6.63	0	.
chr14	78724399	78727999	DB_Ctrl_dev_H3K27me3_P39_vs_E14_down_972|1.56|6.07|-4.51	0	.
chr2	156613799	156622399	DB_Ctrl_dev_H3K27me3_P39_vs_E14_down_973|-0.01|6.63|-6.64	0	.
chr1	165831199	165849399	DB_Ctrl_dev_H3K27me3_P39_vs_E14_down_974|6.64|7.98|-1.34	0	.
chr15	76456399	76462599	DB_Ctrl_dev_H3K27me3_P39_vs_E14_down_975|-0.01|6.61|-6.62	0	.
chr9	121790799	121800599	DB_Ctrl_dev_H3K27me3_P39_vs_E14_down_976|2.16|6.07|-3.92	0	.
chr7	139080199	139089999	DB_Ctrl_dev_H3K27me3_P39_vs_E14_down_978|-0.01|6.61|-6.63	0	.
chr2	178242199	178253399	DB_Ctrl_dev_H3K27me3_P39_vs_E14_down_979|1.3|6.08|-4.78	0	.
chr11	35342599	35357599	DB_Ctrl_dev_H3K27me3_P39_vs_E14_down_980|5.15|7.13|-1.98	0	.
chr7	100175799	100183599	DB_Ctrl_dev_H3K27me3_P39_vs_E14_down_981|5.01|7.14|-2.12	0	.
chr16	43976199	43981399	DB_Ctrl_dev_H3K27me3_P39_vs_E14_down_983|2|6.12|-4.12	0	.
chr4	139572399	139579599	DB_Ctrl_dev_H3K27me3_P39_vs_E14_down_985|0.98|6.1|-5.12	0	.
chr13	54734599	54741599	DB_Ctrl_dev_H3K27me3_P39_vs_E14_down_986|-0.01|6.57|-6.59	0	.
chr7	141286799	141296399	DB_Ctrl_dev_H3K27me3_P39_vs_E14_down_988|6.01|7.59|-1.58	0	.
chr8	120114399	120119799	DB_Ctrl_dev_H3K27me3_P39_vs_E14_down_989|2.3|6.18|-3.88	0	.
chr19	55624599	55632599	DB_Ctrl_dev_H3K27me3_P39_vs_E14_down_990|1.99|6.08|-4.09	0	.
chr8	17531399	17538999	DB_Ctrl_dev_H3K27me3_P39_vs_E14_down_991|-0.01|6.57|-6.58	0	.
chr9	81630999	81636599	DB_Ctrl_dev_H3K27me3_P39_vs_E14_down_992|4.66|6.88|-2.22	0	.
chr8	126294799	126302999	DB_Ctrl_dev_H3K27me3_P39_vs_E14_down_993|-0.01|6.57|-6.58	0	.
chr11	117778199	117787799	DB_Ctrl_dev_H3K27me3_P39_vs_E14_down_994|5.66|7.42|-1.76	0	.
chr5	37013399	37020199	DB_Ctrl_dev_H3K27me3_P39_vs_E14_down_995|2.98|6.24|-3.25	0	.
chr2	32309999	32319199	DB_Ctrl_dev_H3K27me3_P39_vs_E14_down_996|-0.01|6.57|-6.58	0	.
chr10	89343199	89348199	DB_Ctrl_dev_H3K27me3_P39_vs_E14_down_997|-0.01|6.57|-6.58	0	.
chr8	15023799	15030199	DB_Ctrl_dev_H3K27me3_P39_vs_E14_down_998|-0.01|6.57|-6.58	0	.
chr4	129372999	129380799	DB_Ctrl_dev_H3K27me3_P39_vs_E14_down_999|1.32|6.06|-4.74	0	.
chr1	37713599	37722599	DB_Ctrl_dev_H3K27me3_P39_vs_E14_down_1000|-0.01|6.56|-6.58	0	.
chr1	75373199	75381599	DB_Ctrl_dev_H3K27me3_P39_vs_E14_down_1001|4.82|6.95|-2.13	0	.
chr13	75705999	75709999	DB_Ctrl_dev_H3K27me3_P39_vs_E14_down_1002|1.79|6.04|-4.25	0	.
chr19	46122599	46151799	DB_Ctrl_dev_H3K27me3_P39_vs_E14_down_1003|8.38|9.26|-0.87	0	.
chr14	70285999	70290599	DB_Ctrl_dev_H3K27me3_P39_vs_E14_down_1004|-0.01|6.55|-6.57	0	.
chr10	7586999	7593799	DB_Ctrl_dev_H3K27me3_P39_vs_E14_down_1005|2|6.09|-4.09	0	.
chr4	156254399	156255999	DB_Ctrl_dev_H3K27me3_P39_vs_E14_down_1007|2.99|6.23|-3.24	0	.
chr3	96523199	96530599	DB_Ctrl_dev_H3K27me3_P39_vs_E14_down_1008|-0.01|6.56|-6.57	0	.
chr3	123443799	123449799	DB_Ctrl_dev_H3K27me3_P39_vs_E14_down_1009|3.57|6.43|-2.86	0	.
chr15	74536799	74546599	DB_Ctrl_dev_H3K27me3_P39_vs_E14_down_1010|-0.01|6.55|-6.56	0	.
chr15	76086999	76092999	DB_Ctrl_dev_H3K27me3_P39_vs_E14_down_1011|-0.01|6.55|-6.56	0	.
chr8	36611799	36620199	DB_Ctrl_dev_H3K27me3_P39_vs_E14_down_1012|-0.01|6.55|-6.56	0	.
chr7	44475999	44483399	DB_Ctrl_dev_H3K27me3_P39_vs_E14_down_1014|5.95|7.57|-1.62	0	.
chr14	121794199	121798199	DB_Ctrl_dev_H3K27me3_P39_vs_E14_down_1017|0.99|6.08|-5.09	0	.
chr11	98934199	98940999	DB_Ctrl_dev_H3K27me3_P39_vs_E14_down_1018|-0.01|6.54|-6.55	0	.
chr10	94939399	94944399	DB_Ctrl_dev_H3K27me3_P39_vs_E14_down_1019|-0.01|6.54|-6.55	0	.
chr11	102142599	102151399	DB_Ctrl_dev_H3K27me3_P39_vs_E14_down_1021|6.58|7.94|-1.36	0	.
chrX	155621799	155627199	DB_Ctrl_dev_H3K27me3_P39_vs_E14_down_1022|2.16|6.09|-3.93	0	.
chr7	19808199	19825799	DB_Ctrl_dev_H3K27me3_P39_vs_E14_down_1023|7.28|8.45|-1.18	0	.
chr5	64154799	64162199	DB_Ctrl_dev_H3K27me3_P39_vs_E14_down_1025|2.14|6.12|-3.97	0	.
chr2	155771799	155778799	DB_Ctrl_dev_H3K27me3_P39_vs_E14_down_1026|4.3|6.79|-2.49	0	.
chr4	154023599	154037799	DB_Ctrl_dev_H3K27me3_P39_vs_E14_down_1027|5.29|7.19|-1.9	0	.
chr2	119795199	119804199	DB_Ctrl_dev_H3K27me3_P39_vs_E14_down_1028|-0.01|6.52|-6.54	0	.
chr1	172560199	172563599	DB_Ctrl_dev_H3K27me3_P39_vs_E14_down_1029|3.15|6.27|-3.12	0	.
chr1	136048199	136051599	DB_Ctrl_dev_H3K27me3_P39_vs_E14_down_1030|0.99|6.06|-5.07	0	.
chr7	16308599	16314399	DB_Ctrl_dev_H3K27me3_P39_vs_E14_down_1031|-0.01|6.52|-6.53	0	.
chr7	49517199	49524599	DB_Ctrl_dev_H3K27me3_P39_vs_E14_down_1032|3.16|6.32|-3.16	0	.
chr8	22972999	22983799	DB_Ctrl_dev_H3K27me3_P39_vs_E14_down_1033|5.51|7.29|-1.78	0	.
chr2	181034599	181046199	DB_Ctrl_dev_H3K27me3_P39_vs_E14_down_1034|5.31|7.21|-1.9	0	.
chr6	50450799	50460199	DB_Ctrl_dev_H3K27me3_P39_vs_E14_down_1035|2.79|6.19|-3.4	0	.
chr15	103338799	103342199	DB_Ctrl_dev_H3K27me3_P39_vs_E14_down_1036|0.58|6.18|-5.6	0	.
chr5	121005199	121012799	DB_Ctrl_dev_H3K27me3_P39_vs_E14_down_1037|1.3|6.03|-4.73	0	.
chr2	119309799	119337999	DB_Ctrl_dev_H3K27me3_P39_vs_E14_down_1038|7.9|8.89|-0.99	0	.
chr3	68491399	68500599	DB_Ctrl_dev_H3K27me3_P39_vs_E14_down_1039|-0.01|6.52|-6.53	0	.
chr18	77182199	77188799	DB_Ctrl_dev_H3K27me3_P39_vs_E14_down_1040|-0.01|6.51|-6.53	0	.
chr2	131040399	131044199	DB_Ctrl_dev_H3K27me3_P39_vs_E14_down_1041|1.97|6.06|-4.09	0	.
chr17	34182999	34201799	DB_Ctrl_dev_H3K27me3_P39_vs_E14_down_1042|7.23|8.36|-1.13	0	.
chr4	57296799	57303599	DB_Ctrl_dev_H3K27me3_P39_vs_E14_down_1044|-0.01|6.5|-6.52	0	.
chr14	46377799	46401199	DB_Ctrl_dev_H3K27me3_P39_vs_E14_down_1045|8.15|9.13|-0.98	0	.
chr18	35926399	35935599	DB_Ctrl_dev_H3K27me3_P39_vs_E14_down_1046|3.38|6.33|-2.95	0	.
chr14	35110199	35123199	DB_Ctrl_dev_H3K27me3_P39_vs_E14_down_1047|3.98|6.61|-2.62	0	.
chr13	43782999	43790199	DB_Ctrl_dev_H3K27me3_P39_vs_E14_down_1048|4.66|6.99|-2.33	0	.
chr1	38834599	38843399	DB_Ctrl_dev_H3K27me3_P39_vs_E14_down_1049|4.08|6.61|-2.53	0	.
chr11	95506199	95515199	DB_Ctrl_dev_H3K27me3_P39_vs_E14_down_1050|4.96|7.06|-2.09	0	.
chr3	29081199	29085999	DB_Ctrl_dev_H3K27me3_P39_vs_E14_down_1051|2.89|6.19|-3.3	0	.
chr4	136636199	136640399	DB_Ctrl_dev_H3K27me3_P39_vs_E14_down_1052|-0.01|6.49|-6.51	0	.
chr14	34890999	34898599	DB_Ctrl_dev_H3K27me3_P39_vs_E14_down_1053|0.99|6.05|-5.06	0	.
chr15	76666399	76671199	DB_Ctrl_dev_H3K27me3_P39_vs_E14_down_1054|-0.01|6.49|-6.5	0	.
chr11	53454599	53459799	DB_Ctrl_dev_H3K27me3_P39_vs_E14_down_1057|5.03|7.05|-2.03	0	.
chr10	75829999	75835599	DB_Ctrl_dev_H3K27me3_P39_vs_E14_down_1058|3.9|6.53|-2.64	0	.
chr2	5135399	5141599	DB_Ctrl_dev_H3K27me3_P39_vs_E14_down_1059|4.19|6.76|-2.57	0	.
chr12	117098999	117113799	DB_Ctrl_dev_H3K27me3_P39_vs_E14_down_1060|5.08|7.15|-2.07	0	.
chr18	80318599	80330999	DB_Ctrl_dev_H3K27me3_P39_vs_E14_down_1061|5.41|7.23|-1.82	0	.
chr7	139939599	139956599	DB_Ctrl_dev_H3K27me3_P39_vs_E14_down_1062|7.12|8.28|-1.16	0	.
chr18	61396999	61403399	DB_Ctrl_dev_H3K27me3_P39_vs_E14_down_1063|-0.01|6.51|-6.52	0	.
chr19	58990999	59003799	DB_Ctrl_dev_H3K27me3_P39_vs_E14_down_1064|-0.01|6.48|-6.5	0	.
chr9	65625799	65633799	DB_Ctrl_dev_H3K27me3_P39_vs_E14_down_1065|6.12|7.77|-1.65	0	.
chr19	58976999	58986999	DB_Ctrl_dev_H3K27me3_P39_vs_E14_down_1067|4.11|6.61|-2.5	0	.
chr9	102208599	102224599	DB_Ctrl_dev_H3K27me3_P39_vs_E14_down_1068|4.82|6.99|-2.17	0	.
chr10	81238799	81247399	DB_Ctrl_dev_H3K27me3_P39_vs_E14_down_1070|-0.01|6.47|-6.49	0	.
chr4	155839599	155844999	DB_Ctrl_dev_H3K27me3_P39_vs_E14_down_1071|1.99|6.02|-4.02	0	.
chr2	74637399	74773599	DB_Ctrl_dev_H3K27me3_P39_vs_E14_down_1072|11.38|12.13|-0.75	0	.
chr12	110268999	110292999	DB_Ctrl_dev_H3K27me3_P39_vs_E14_down_1073|7.66|8.77|-1.11	0	.
chr11	100390999	100397999	DB_Ctrl_dev_H3K27me3_P39_vs_E14_down_1074|-0.01|6.47|-6.48	0	.
chr12	116926999	116936799	DB_Ctrl_dev_H3K27me3_P39_vs_E14_down_1076|3.75|6.55|-2.8	0	.
chr1	91535199	91541599	DB_Ctrl_dev_H3K27me3_P39_vs_E14_down_1078|2.99|6.22|-3.23	0	.
chr6	52284199	52326799	DB_Ctrl_dev_H3K27me3_P39_vs_E14_down_1079|9.48|10.26|-0.77	0	.
chr5	47983199	47986999	DB_Ctrl_dev_H3K27me3_P39_vs_E14_down_1080|1.97|6.05|-4.07	0	.
chr15	101073999	101080599	DB_Ctrl_dev_H3K27me3_P39_vs_E14_down_1081|5.85|7.54|-1.7	0	.
chr6	48625599	48630999	DB_Ctrl_dev_H3K27me3_P39_vs_E14_down_1082|-0.01|6.46|-6.48	0	.
chr4	3050199	3056599	DB_Ctrl_dev_H3K27me3_P39_vs_E14_down_1083|2.3|6.05|-3.75	0	.
chr11	50597799	50608799	DB_Ctrl_dev_H3K27me3_P39_vs_E14_down_1085|6.3|7.82|-1.51	0	.
chr9	55324399	55332999	DB_Ctrl_dev_H3K27me3_P39_vs_E14_down_1086|3.79|6.47|-2.68	0	.
chr16	31931199	31936999	DB_Ctrl_dev_H3K27me3_P39_vs_E14_down_1088|-0.01|6.46|-6.47	0	.
chr5	106548399	106577999	DB_Ctrl_dev_H3K27me3_P39_vs_E14_down_1089|7.89|8.86|-0.97	0	.
chr10	60105599	60110199	DB_Ctrl_dev_H3K27me3_P39_vs_E14_down_1090|-0.01|6.45|-6.47	0	.
chr7	45865999	45871999	DB_Ctrl_dev_H3K27me3_P39_vs_E14_down_1092|5.12|7.15|-2.03	0	.
chr11	69231199	69239199	DB_Ctrl_dev_H3K27me3_P39_vs_E14_down_1093|5.43|7.23|-1.8	0	.
chr9	78438199	78446999	DB_Ctrl_dev_H3K27me3_P39_vs_E14_down_1094|6.49|7.85|-1.35	0	.
chr16	17275599	17278599	DB_Ctrl_dev_H3K27me3_P39_vs_E14_down_1095|-0.01|6.45|-6.47	0	.
chr1	121041799	121068999	DB_Ctrl_dev_H3K27me3_P39_vs_E14_down_1096|7.51|8.61|-1.1	0	.
chr6	52850999	52858199	DB_Ctrl_dev_H3K27me3_P39_vs_E14_down_1098|3.23|6.27|-3.04	0	.
chr2	9863599	9904399	DB_Ctrl_dev_H3K27me3_P39_vs_E14_down_1099|9.53|10.22|-0.7	0	.
chr8	84780999	84787399	DB_Ctrl_dev_H3K27me3_P39_vs_E14_down_1100|-0.01|6.45|-6.46	0	.
chr1	134231799	134237199	DB_Ctrl_dev_H3K27me3_P39_vs_E14_down_1101|-0.01|6.44|-6.45	0	.
chr6	6839199	6885799	DB_Ctrl_dev_H3K27me3_P39_vs_E14_down_1102|9.75|10.46|-0.72	0	.
chr17	24203999	24210999	DB_Ctrl_dev_H3K27me3_P39_vs_E14_down_1104|-0.01|6.43|-6.45	0	.
chr8	105468399	105475199	DB_Ctrl_dev_H3K27me3_P39_vs_E14_down_1105|-0.01|6.45|-6.46	0	.
chr2	25862799	25868199	DB_Ctrl_dev_H3K27me3_P39_vs_E14_down_1106|0.57|6.12|-5.56	0	.
chr7	98826599	98844599	DB_Ctrl_dev_H3K27me3_P39_vs_E14_down_1107|7.84|8.83|-0.99	0	.
chr9	108825599	108834999	DB_Ctrl_dev_H3K27me3_P39_vs_E14_down_1109|-0.01|6.43|-6.44	0	.
chr15	99049399	99065399	DB_Ctrl_dev_H3K27me3_P39_vs_E14_down_1110|6.61|7.92|-1.31	0	.
chr15	85816799	85824199	DB_Ctrl_dev_H3K27me3_P39_vs_E14_down_1111|3.79|6.49|-2.7	0	.
chr15	94627599	94632399	DB_Ctrl_dev_H3K27me3_P39_vs_E14_down_1112|3.16|6.32|-3.15	0	.
chr19	55935999	55943799	DB_Ctrl_dev_H3K27me3_P39_vs_E14_down_1113|1.78|5.99|-4.21	0	.
chr8	94767999	94774599	DB_Ctrl_dev_H3K27me3_P39_vs_E14_down_1114|1.58|5.97|-4.39	0	.
chr1	146493199	146499599	DB_Ctrl_dev_H3K27me3_P39_vs_E14_down_1116|1.56|5.97|-4.41	0	.
chr4	132142599	132146399	DB_Ctrl_dev_H3K27me3_P39_vs_E14_down_1117|-0.01|6.42|-6.43	0	.
chr7	29012799	29023799	DB_Ctrl_dev_H3K27me3_P39_vs_E14_down_1118|5.33|7.22|-1.9	0	.
chr8	122719199	122726199	DB_Ctrl_dev_H3K27me3_P39_vs_E14_down_1119|1.56|5.98|-4.42	0	.
chr9	107231999	107239399	DB_Ctrl_dev_H3K27me3_P39_vs_E14_down_1123|-0.01|6.4|-6.42	0	.
chr9	57689999	57705799	DB_Ctrl_dev_H3K27me3_P39_vs_E14_down_1124|5.66|7.36|-1.7	0	.
chr14	99296199	99302599	DB_Ctrl_dev_H3K27me3_P39_vs_E14_down_1125|4.03|6.57|-2.54	0	.
chr10	13565599	13575599	DB_Ctrl_dev_H3K27me3_P39_vs_E14_down_1126|-0.01|6.41|-6.43	0	.
chr4	102085599	102091399	DB_Ctrl_dev_H3K27me3_P39_vs_E14_down_1127|-0.01|6.4|-6.42	0	.
chr3	52265399	52272599	DB_Ctrl_dev_H3K27me3_P39_vs_E14_down_1128|5.57|7.32|-1.75	0	.
chr15	101119999	101134199	DB_Ctrl_dev_H3K27me3_P39_vs_E14_down_1129|6.06|7.59|-1.52	0	.
chr2	164937599	164954799	DB_Ctrl_dev_H3K27me3_P39_vs_E14_down_1131|6.79|8.14|-1.35	0	.
chr5	75142199	75158399	DB_Ctrl_dev_H3K27me3_P39_vs_E14_down_1132|8.05|9.03|-0.98	0	.
chr2	109979399	109996399	DB_Ctrl_dev_H3K27me3_P39_vs_E14_down_1133|5.79|7.41|-1.62	0	.
chr1	18056399	18060399	DB_Ctrl_dev_H3K27me3_P39_vs_E14_down_1134|2.17|6.07|-3.91	0	.
chr8	124458399	124464599	DB_Ctrl_dev_H3K27me3_P39_vs_E14_down_1135|2.8|6.12|-3.33	0	.
chr17	25812199	25822199	DB_Ctrl_dev_H3K27me3_P39_vs_E14_down_1136|-0.01|6.39|-6.4	0	.
chr11	88188399	88198399	DB_Ctrl_dev_H3K27me3_P39_vs_E14_down_1137|4.57|6.79|-2.22	0	.
chr16	21204799	21212799	DB_Ctrl_dev_H3K27me3_P39_vs_E14_down_1139|-0.01|6.39|-6.4	0	.
chr7	131798599	131814399	DB_Ctrl_dev_H3K27me3_P39_vs_E14_down_1140|5.56|7.29|-1.73	0	.
chr11	116219999	116227199	DB_Ctrl_dev_H3K27me3_P39_vs_E14_down_1141|5.77|7.44|-1.68	0	.
chr17	29234599	29242199	DB_Ctrl_dev_H3K27me3_P39_vs_E14_down_1142|-0.01|6.38|-6.39	0	.
chr11	103736199	103760599	DB_Ctrl_dev_H3K27me3_P39_vs_E14_down_1143|7.34|8.44|-1.1	0	.
chr19	4203399	4227799	DB_Ctrl_dev_H3K27me3_P39_vs_E14_down_1144|7.43|8.49|-1.06	0	.
chr11	74634799	74642599	DB_Ctrl_dev_H3K27me3_P39_vs_E14_down_1145|1.56|5.95|-4.39	0	.
chr6	28979399	28987199	DB_Ctrl_dev_H3K27me3_P39_vs_E14_down_1146|-0.01|6.37|-6.39	0	.
chr6	114037799	114044599	DB_Ctrl_dev_H3K27me3_P39_vs_E14_down_1147|-0.01|6.37|-6.39	0	.
chr12	108205399	108215599	DB_Ctrl_dev_H3K27me3_P39_vs_E14_down_1148|1.56|5.95|-4.39	0	.
chr7	3299999	3306999	DB_Ctrl_dev_H3K27me3_P39_vs_E14_down_1149|-0.01|6.37|-6.39	0	.
chr14	72708999	72714599	DB_Ctrl_dev_H3K27me3_P39_vs_E14_down_1150|2.44|6.06|-3.62	0	.
chr19	59128999	59200199	DB_Ctrl_dev_H3K27me3_P39_vs_E14_down_1152|9.74|10.41|-0.68	0	.
chr12	85597599	85600999	DB_Ctrl_dev_H3K27me3_P39_vs_E14_down_1153|1.32|5.94|-4.62	0	.
chr7	139118399	139132199	DB_Ctrl_dev_H3K27me3_P39_vs_E14_down_1154|-0.01|6.36|-6.38	0	.
chr8	122341399	122348599	DB_Ctrl_dev_H3K27me3_P39_vs_E14_down_1155|-0.01|6.36|-6.38	0	.
chr16	5731999	5742599	DB_Ctrl_dev_H3K27me3_P39_vs_E14_down_1156|4.34|6.75|-2.41	0	.
chr9	123258399	123272399	DB_Ctrl_dev_H3K27me3_P39_vs_E14_down_1157|5.13|7.06|-1.92	0	.
chr7	131766399	131784199	DB_Ctrl_dev_H3K27me3_P39_vs_E14_down_1158|6.57|7.94|-1.37	0	.
chr8	125991399	125998399	DB_Ctrl_dev_H3K27me3_P39_vs_E14_down_1159|-0.01|6.36|-6.37	0	.
chr6	120291399	120296199	DB_Ctrl_dev_H3K27me3_P39_vs_E14_down_1160|0.99|5.96|-4.97	0	.
chr11	120653599	120667599	DB_Ctrl_dev_H3K27me3_P39_vs_E14_down_1161|7.29|8.39|-1.11	0	.
chr18	23750799	23755999	DB_Ctrl_dev_H3K27me3_P39_vs_E14_down_1165|2.16|5.98|-3.82	0	.
chr17	30279599	30289399	DB_Ctrl_dev_H3K27me3_P39_vs_E14_down_1167|2.43|6.12|-3.69	0	.
chr11	43812599	43823399	DB_Ctrl_dev_H3K27me3_P39_vs_E14_down_1168|5.01|7.01|-2	0	.
chr14	63225399	63277999	DB_Ctrl_dev_H3K27me3_P39_vs_E14_down_1169|9.79|10.52|-0.73	0	.
chr7	131452399	131480399	DB_Ctrl_dev_H3K27me3_P39_vs_E14_down_1171|7.21|8.36|-1.15	0	.
chr5	29461199	29501999	DB_Ctrl_dev_H3K27me3_P39_vs_E14_down_1172|9.34|10.06|-0.73	0	.
chr16	8511399	8533799	DB_Ctrl_dev_H3K27me3_P39_vs_E14_down_1174|6.93|8.15|-1.23	0	.
chr11	30021199	30025399	DB_Ctrl_dev_H3K27me3_P39_vs_E14_down_1175|2.69|6.06|-3.37	0	.
chr7	25008599	25012799	DB_Ctrl_dev_H3K27me3_P39_vs_E14_down_1176|0.98|5.95|-4.97	0	.
chr11	104564599	104573799	DB_Ctrl_dev_H3K27me3_P39_vs_E14_down_1177|-0.01|6.34|-6.35	0	.
chr11	101257999	101267399	DB_Ctrl_dev_H3K27me3_P39_vs_E14_down_1178|6.67|7.98|-1.31	0	.
chr1	91177199	91183599	DB_Ctrl_dev_H3K27me3_P39_vs_E14_down_1179|-0.01|6.33|-6.34	0	.
chr12	24570599	24576799	DB_Ctrl_dev_H3K27me3_P39_vs_E14_down_1180|2.44|6.06|-3.62	0	.
chr8	104627999	104633399	DB_Ctrl_dev_H3K27me3_P39_vs_E14_down_1181|4.47|6.78|-2.31	0	.
chr11	54025799	54029999	DB_Ctrl_dev_H3K27me3_P39_vs_E14_down_1182|2.98|6.16|-3.17	0	.
chr2	92912599	92916799	DB_Ctrl_dev_H3K27me3_P39_vs_E14_down_1184|1.97|5.98|-4.01	0	.
chr17	25250199	25260599	DB_Ctrl_dev_H3K27me3_P39_vs_E14_down_1185|5.52|7.24|-1.72	0	.
chr7	139576799	139592599	DB_Ctrl_dev_H3K27me3_P39_vs_E14_down_1186|7.84|8.91|-1.07	0	.
chr13	108213199	108218999	DB_Ctrl_dev_H3K27me3_P39_vs_E14_down_1187|3.63|6.37|-2.74	0	.
chr4	138248799	138258599	DB_Ctrl_dev_H3K27me3_P39_vs_E14_down_1188|-0.01|6.32|-6.33	0	.
chr1	40675799	40686599	DB_Ctrl_dev_H3K27me3_P39_vs_E14_down_1190|6.03|7.57|-1.54	0	.
chr7	101319199	101326399	DB_Ctrl_dev_H3K27me3_P39_vs_E14_down_1191|3.63|6.35|-2.72	0	.
chr7	140152199	140157799	DB_Ctrl_dev_H3K27me3_P39_vs_E14_down_1192|-0.01|6.32|-6.33	0	.
chr10	59534399	59542799	DB_Ctrl_dev_H3K27me3_P39_vs_E14_down_1193|3.45|6.29|-2.85	0	.
chr3	98425199	98429999	DB_Ctrl_dev_H3K27me3_P39_vs_E14_down_1194|2.8|6.21|-3.4	0	.
chr1	152949999	152957799	DB_Ctrl_dev_H3K27me3_P39_vs_E14_down_1195|3.63|6.38|-2.75	0	.
chr7	49619199	49641999	DB_Ctrl_dev_H3K27me3_P39_vs_E14_down_1196|8.47|9.34|-0.87	0	.
chr14	69186999	69195399	DB_Ctrl_dev_H3K27me3_P39_vs_E14_down_1197|5.05|7.01|-1.96	0	.
chr5	107258999	107277799	DB_Ctrl_dev_H3K27me3_P39_vs_E14_down_1199|6.22|7.69|-1.47	0	.
chr4	140698199	140701399	DB_Ctrl_dev_H3K27me3_P39_vs_E14_down_1200|1.8|5.96|-4.16	0	.
chr2	180731799	180741399	DB_Ctrl_dev_H3K27me3_P39_vs_E14_down_1201|-0.01|6.31|-6.33	0	.
chr4	155770999	155777999	DB_Ctrl_dev_H3K27me3_P39_vs_E14_down_1202|-0.01|6.31|-6.32	0	.
chr11	74568599	74575399	DB_Ctrl_dev_H3K27me3_P39_vs_E14_down_1203|1.3|5.89|-4.59	0	.
chr11	103804799	103815999	DB_Ctrl_dev_H3K27me3_P39_vs_E14_down_1204|5.93|7.5|-1.58	0	.
chr2	91252199	91258999	DB_Ctrl_dev_H3K27me3_P39_vs_E14_down_1205|-0.01|6.3|-6.32	0	.
chr11	85820799	85847599	DB_Ctrl_dev_H3K27me3_P39_vs_E14_down_1206|9.02|9.9|-0.88	0	.
chr19	37170799	37177399	DB_Ctrl_dev_H3K27me3_P39_vs_E14_down_1207|-0.01|6.3|-6.31	0	.
chr7	126846799	126851599	DB_Ctrl_dev_H3K27me3_P39_vs_E14_down_1208|-0.01|6.31|-6.32	0	.
chr4	42911399	42919399	DB_Ctrl_dev_H3K27me3_P39_vs_E14_down_1209|-0.01|6.3|-6.32	0	.
chr11	115246399	115270399	DB_Ctrl_dev_H3K27me3_P39_vs_E14_down_1211|7.76|8.87|-1.11	0	.
chr6	83756799	83770399	DB_Ctrl_dev_H3K27me3_P39_vs_E14_down_1212|6.56|7.85|-1.3	0	.
chr15	89520999	89525599	DB_Ctrl_dev_H3K27me3_P39_vs_E14_down_1213|-0.01|6.3|-6.31	0	.
chr15	98722799	98730599	DB_Ctrl_dev_H3K27me3_P39_vs_E14_down_1215|4.31|6.67|-2.36	0	.
chr9	48647399	48650799	DB_Ctrl_dev_H3K27me3_P39_vs_E14_down_1216|1.99|5.91|-3.92	0	.
chr10	117147999	117153599	DB_Ctrl_dev_H3K27me3_P39_vs_E14_down_1217|2.16|5.97|-3.81	0	.
chr13	63970399	63996399	DB_Ctrl_dev_H3K27me3_P39_vs_E14_down_1218|7.51|8.65|-1.14	0	.
chr1	154722199	154729399	DB_Ctrl_dev_H3K27me3_P39_vs_E14_down_1219|-0.01|6.29|-6.31	0	.
chr11	53633999	53638799	DB_Ctrl_dev_H3K27me3_P39_vs_E14_down_1220|0.99|5.93|-4.93	0	.
chr10	81423599	81429999	DB_Ctrl_dev_H3K27me3_P39_vs_E14_down_1221|-0.01|6.29|-6.3	0	.
chr8	105515399	105520799	DB_Ctrl_dev_H3K27me3_P39_vs_E14_down_1222|3.37|6.26|-2.88	0	.
chr6	63256199	63260199	DB_Ctrl_dev_H3K27me3_P39_vs_E14_down_1223|2.44|5.98|-3.54	0	.
chr7	16810199	16814599	DB_Ctrl_dev_H3K27me3_P39_vs_E14_down_1225|-0.01|6.28|-6.3	0	.
chr3	145987599	145990599	DB_Ctrl_dev_H3K27me3_P39_vs_E14_down_1226|0.99|5.92|-4.93	0	.
chr11	59783599	59790399	DB_Ctrl_dev_H3K27me3_P39_vs_E14_down_1227|1.99|5.93|-3.94	0	.
chr12	56430999	56550399	DB_Ctrl_dev_H3K27me3_P39_vs_E14_down_1228|10.62|11.29|-0.67	0	.
chr3	36517799	36525199	DB_Ctrl_dev_H3K27me3_P39_vs_E14_down_1230|-0.01|6.27|-6.29	0	.
chr13	64155599	64165199	DB_Ctrl_dev_H3K27me3_P39_vs_E14_down_1232|4.19|6.56|-2.37	0	.
chr17	45543199	45549399	DB_Ctrl_dev_H3K27me3_P39_vs_E14_down_1233|-0.01|6.28|-6.29	0	.
chr11	31365399	31374599	DB_Ctrl_dev_H3K27me3_P39_vs_E14_down_1235|5.09|7.02|-1.93	0	.
chr14	84444399	84450399	DB_Ctrl_dev_H3K27me3_P39_vs_E14_down_1236|4.16|6.56|-2.41	0	.
chr5	24497599	24506799	DB_Ctrl_dev_H3K27me3_P39_vs_E14_down_1237|4.23|6.6|-2.36	0	.
chr7	45235599	45241999	DB_Ctrl_dev_H3K27me3_P39_vs_E14_down_1238|-0.01|6.27|-6.28	0	.
chr17	48928799	48934599	DB_Ctrl_dev_H3K27me3_P39_vs_E14_down_1239|1.79|5.88|-4.08	0	.
chr11	51645399	51653199	DB_Ctrl_dev_H3K27me3_P39_vs_E14_down_1240|4.11|6.53|-2.42	0	.
chr2	66122399	66126399	DB_Ctrl_dev_H3K27me3_P39_vs_E14_down_1241|4.12|6.54|-2.43	0	.
chr10	80595199	80601799	DB_Ctrl_dev_H3K27me3_P39_vs_E14_down_1242|1.8|5.92|-4.11	0	.
chr11	3994599	4004399	DB_Ctrl_dev_H3K27me3_P39_vs_E14_down_1243|5.44|7.22|-1.78	0	.
chr17	50695799	50700799	DB_Ctrl_dev_H3K27me3_P39_vs_E14_down_1244|2.69|6.07|-3.38	0	.
chr10	80529999	80541399	DB_Ctrl_dev_H3K27me3_P39_vs_E14_down_1245|4.61|6.9|-2.29	0	.
chr11	72047599	72055399	DB_Ctrl_dev_H3K27me3_P39_vs_E14_down_1246|0.57|5.98|-5.42	0	.
chr11	50232399	50239599	DB_Ctrl_dev_H3K27me3_P39_vs_E14_down_1247|2.99|6.1|-3.11	0	.
chr5	110099999	110104199	DB_Ctrl_dev_H3K27me3_P39_vs_E14_down_1249|1.78|5.91|-4.13	0	.
chr15	74675599	74681999	DB_Ctrl_dev_H3K27me3_P39_vs_E14_down_1250|1.3|5.88|-4.58	0	.
chr4	120645599	120652799	DB_Ctrl_dev_H3K27me3_P39_vs_E14_down_1251|0.57|5.98|-5.42	0	.
chr11	116103199	116115199	DB_Ctrl_dev_H3K27me3_P39_vs_E14_down_1254|7.3|8.43|-1.13	0	.
chr11	12015399	12044199	DB_Ctrl_dev_H3K27me3_P39_vs_E14_down_1255|7.76|8.74|-0.98	0	.
chr10	79659599	79668599	DB_Ctrl_dev_H3K27me3_P39_vs_E14_down_1256|2.79|6.05|-3.25	0	.
chr6	120491999	120495199	DB_Ctrl_dev_H3K27me3_P39_vs_E14_down_1257|1.3|5.87|-4.57	0	.
chr7	112157399	112159599	DB_Ctrl_dev_H3K27me3_P39_vs_E14_down_1258|2.44|5.96|-3.52	0	.
chr17	8523599	8528199	DB_Ctrl_dev_H3K27me3_P39_vs_E14_down_1259|-0.01|6.25|-6.27	0	.
chr4	22491399	22501799	DB_Ctrl_dev_H3K27me3_P39_vs_E14_down_1260|4.63|6.84|-2.21	0	.
chr7	100598399	100606799	DB_Ctrl_dev_H3K27me3_P39_vs_E14_down_1261|1.79|5.9|-4.12	0	.
chr5	144760199	144766999	DB_Ctrl_dev_H3K27me3_P39_vs_E14_down_1263|-0.01|6.25|-6.26	0	.
chr3	85885199	85889999	DB_Ctrl_dev_H3K27me3_P39_vs_E14_down_1264|-0.01|6.24|-6.26	0	.
chr2	36199599	36205999	DB_Ctrl_dev_H3K27me3_P39_vs_E14_down_1265|-0.01|6.24|-6.25	0	.
chr7	28690599	28695399	DB_Ctrl_dev_H3K27me3_P39_vs_E14_down_1266|-0.01|6.24|-6.25	0	.
chr11	78486199	78494999	DB_Ctrl_dev_H3K27me3_P39_vs_E14_down_1267|-0.01|6.25|-6.27	0	.
chr4	136460799	136464999	DB_Ctrl_dev_H3K27me3_P39_vs_E14_down_1268|-0.01|6.25|-6.26	0	.
chr12	76821199	76826799	DB_Ctrl_dev_H3K27me3_P39_vs_E14_down_1269|1.3|5.86|-4.56	0	.
chr8	4202399	4210799	DB_Ctrl_dev_H3K27me3_P39_vs_E14_down_1270|-0.01|6.24|-6.25	0	.
chr9	106197999	106204599	DB_Ctrl_dev_H3K27me3_P39_vs_E14_down_1271|1.3|5.88|-4.58	0	.
chr13	51566399	51569199	DB_Ctrl_dev_H3K27me3_P39_vs_E14_down_1273|-0.01|6.25|-6.26	0	.
chr5	150589799	150597399	DB_Ctrl_dev_H3K27me3_P39_vs_E14_down_1274|-0.01|6.24|-6.25	0	.
chr18	11838399	11844599	DB_Ctrl_dev_H3K27me3_P39_vs_E14_down_1275|3.74|6.39|-2.66	0	.
chr16	30598599	30602399	DB_Ctrl_dev_H3K27me3_P39_vs_E14_down_1276|4.57|6.72|-2.15	0	.
chr6	18027399	18032999	DB_Ctrl_dev_H3K27me3_P39_vs_E14_down_1278|4.3|6.73|-2.43	0	.
chr19	6530999	6540799	DB_Ctrl_dev_H3K27me3_P39_vs_E14_down_1279|-0.01|6.23|-6.24	0	.
chr7	19273399	19283799	DB_Ctrl_dev_H3K27me3_P39_vs_E14_down_1280|5.51|7.25|-1.74	0	.
chr9	98031399	98039199	DB_Ctrl_dev_H3K27me3_P39_vs_E14_down_1281|2.43|6.06|-3.63	0	.
chr5	139307599	139319799	DB_Ctrl_dev_H3K27me3_P39_vs_E14_down_1282|-0.01|6.22|-6.24	0	.
chr9	106651199	106656999	DB_Ctrl_dev_H3K27me3_P39_vs_E14_down_1283|-0.01|6.23|-6.24	0	.
chr13	54975399	54982199	DB_Ctrl_dev_H3K27me3_P39_vs_E14_down_1285|2.68|6.02|-3.33	0	.
chr17	69968399	69973599	DB_Ctrl_dev_H3K27me3_P39_vs_E14_down_1286|1.97|5.93|-3.95	0	.
chr11	97401199	97409399	DB_Ctrl_dev_H3K27me3_P39_vs_E14_down_1289|-0.01|6.21|-6.23	0	.
chr6	67529999	67537999	DB_Ctrl_dev_H3K27me3_P39_vs_E14_down_1292|6.35|7.71|-1.35	0	.
chr2	168115799	168120999	DB_Ctrl_dev_H3K27me3_P39_vs_E14_down_1293|0.99|5.88|-4.89	0	.
chr3	3020799	3031399	DB_Ctrl_dev_H3K27me3_P39_vs_E14_down_1294|3.69|6.34|-2.65	0	.
chr17	5492599	5498999	DB_Ctrl_dev_H3K27me3_P39_vs_E14_down_1295|-0.01|6.23|-6.24	0	.
chr2	74452799	74467999	DB_Ctrl_dev_H3K27me3_P39_vs_E14_down_1296|5.77|7.4|-1.63	0	.
chr8	91638799	91650399	DB_Ctrl_dev_H3K27me3_P39_vs_E14_down_1297|4.92|6.91|-1.99	0	.
chr13	13782999	13787599	DB_Ctrl_dev_H3K27me3_P39_vs_E14_down_1298|4.16|6.54|-2.38	0	.
chr5	124093199	124099399	DB_Ctrl_dev_H3K27me3_P39_vs_E14_down_1299|-0.01|6.21|-6.23	0	.
chr6	52146399	52282999	DB_Ctrl_dev_H3K27me3_P39_vs_E14_down_1300|11.59|12.31|-0.71	0	.
chr12	112798799	112804399	DB_Ctrl_dev_H3K27me3_P39_vs_E14_down_1301|4.03|6.52|-2.49	0	.
chr13	38343399	38350599	DB_Ctrl_dev_H3K27me3_P39_vs_E14_down_1302|6.21|7.76|-1.55	0	.
chr19	24026399	24034599	DB_Ctrl_dev_H3K27me3_P39_vs_E14_down_1303|4.72|6.81|-2.1	0	.
chr7	49897799	49934599	DB_Ctrl_dev_H3K27me3_P39_vs_E14_down_1304|8.87|9.65|-0.78	0	.
chr10	128194799	128199199	DB_Ctrl_dev_H3K27me3_P39_vs_E14_down_1305|0.58|5.94|-5.37	0	.
chr6	38662599	38668599	DB_Ctrl_dev_H3K27me3_P39_vs_E14_down_1307|1.3|5.85|-4.55	0	.
chr5	147252999	147327399	DB_Ctrl_dev_H3K27me3_P39_vs_E14_down_1308|10.16|10.82|-0.66	0	.
chr7	27356399	27359799	DB_Ctrl_dev_H3K27me3_P39_vs_E14_down_1309|0.58|5.95|-5.38	0	.
chr17	46518799	46525199	DB_Ctrl_dev_H3K27me3_P39_vs_E14_down_1310|-0.01|6.2|-6.21	0	.
chr7	101815599	101824599	DB_Ctrl_dev_H3K27me3_P39_vs_E14_down_1311|7.29|8.37|-1.07	0	.
chr12	87097199	87104599	DB_Ctrl_dev_H3K27me3_P39_vs_E14_down_1312|4.96|6.93|-1.97	0	.
chr2	29189199	29199399	DB_Ctrl_dev_H3K27me3_P39_vs_E14_down_1313|3.74|6.35|-2.61	0	.
chr3	110142199	110145999	DB_Ctrl_dev_H3K27me3_P39_vs_E14_down_1314|0.99|5.85|-4.86	0	.
chr11	98451199	98473599	DB_Ctrl_dev_H3K27me3_P39_vs_E14_down_1315|6.16|7.67|-1.51	0	.
chr5	145112199	145117599	DB_Ctrl_dev_H3K27me3_P39_vs_E14_down_1316|4.45|6.67|-2.23	0	.
chr9	42895599	42899799	DB_Ctrl_dev_H3K27me3_P39_vs_E14_down_1317|2.32|6.01|-3.69	0	.
chr15	52694399	52711399	DB_Ctrl_dev_H3K27me3_P39_vs_E14_down_1318|5.55|7.23|-1.67	0	.
chr17	33972999	33982599	DB_Ctrl_dev_H3K27me3_P39_vs_E14_down_1319|6.12|7.56|-1.44	0	.
chr6	98757999	98767599	DB_Ctrl_dev_H3K27me3_P39_vs_E14_down_1320|4.66|6.76|-2.11	0	.
chr11	44041399	44061199	DB_Ctrl_dev_H3K27me3_P39_vs_E14_down_1321|6.23|7.66|-1.42	0	.
chr8	87462399	87478799	DB_Ctrl_dev_H3K27me3_P39_vs_E14_down_1322|7.22|8.3|-1.08	0	.
chr12	104463599	104487399	DB_Ctrl_dev_H3K27me3_P39_vs_E14_down_1323|8.32|9.15|-0.84	0	.
chr4	57779999	57786199	DB_Ctrl_dev_H3K27me3_P39_vs_E14_down_1324|3.31|6.2|-2.9	0	.
chr14	64404599	64410799	DB_Ctrl_dev_H3K27me3_P39_vs_E14_down_1325|2.17|5.96|-3.79	0	.
chr5	113296599	113302799	DB_Ctrl_dev_H3K27me3_P39_vs_E14_down_1326|1.78|5.9|-4.12	0	.
chr7	24584199	24588399	DB_Ctrl_dev_H3K27me3_P39_vs_E14_down_1327|-0.01|6.19|-6.2	0	.
chr16	6971199	6978799	DB_Ctrl_dev_H3K27me3_P39_vs_E14_down_1328|4.11|6.53|-2.41	0	.
chr11	95793999	95798799	DB_Ctrl_dev_H3K27me3_P39_vs_E14_down_1329|1.32|5.84|-4.52	0	.
chr10	112267399	112273999	DB_Ctrl_dev_H3K27me3_P39_vs_E14_down_1330|4.98|6.92|-1.93	0	.
chr2	33127999	33134999	DB_Ctrl_dev_H3K27me3_P39_vs_E14_down_1331|-0.01|6.18|-6.2	0	.
chr5	81317799	81328599	DB_Ctrl_dev_H3K27me3_P39_vs_E14_down_1332|3.3|6.35|-3.05	0	.
chr5	75061399	75098399	DB_Ctrl_dev_H3K27me3_P39_vs_E14_down_1333|9.23|9.99|-0.76	0	.
chr1	155714399	155755199	DB_Ctrl_dev_H3K27me3_P39_vs_E14_down_1334|9.29|9.99|-0.7	0	.
chr13	12102999	12106799	DB_Ctrl_dev_H3K27me3_P39_vs_E14_down_1337|-0.01|6.18|-6.2	0	.
chr14	57520599	57526399	DB_Ctrl_dev_H3K27me3_P39_vs_E14_down_1338|1.79|5.84|-4.05	0	.
chr11	98034799	98040399	DB_Ctrl_dev_H3K27me3_P39_vs_E14_down_1339|1.56|5.85|-4.29	0	.
chr10	80831999	80838399	DB_Ctrl_dev_H3K27me3_P39_vs_E14_down_1341|-0.01|6.17|-6.18	0	.
chr9	37547599	37552599	DB_Ctrl_dev_H3K27me3_P39_vs_E14_down_1342|-0.01|6.17|-6.18	0	.
chr5	101513999	101550799	DB_Ctrl_dev_H3K27me3_P39_vs_E14_down_1343|8.76|9.56|-0.79	0	.
chr11	106015799	106022799	DB_Ctrl_dev_H3K27me3_P39_vs_E14_down_1344|-0.01|6.17|-6.18	0	.
chr11	108891399	108898999	DB_Ctrl_dev_H3K27me3_P39_vs_E14_down_1345|1.8|5.88|-4.07	0	.
chr11	30264599	30273599	DB_Ctrl_dev_H3K27me3_P39_vs_E14_down_1346|-0.01|6.16|-6.18	0	.
chr14	54779599	54784999	DB_Ctrl_dev_H3K27me3_P39_vs_E14_down_1347|0.58|5.92|-5.34	0	.
chr5	129291599	129306999	DB_Ctrl_dev_H3K27me3_P39_vs_E14_down_1348|4.87|6.87|-2	0	.
chr13	45465599	45480199	DB_Ctrl_dev_H3K27me3_P39_vs_E14_down_1349|5.79|7.38|-1.59	0	.
chr2	118369199	118374399	DB_Ctrl_dev_H3K27me3_P39_vs_E14_down_1350|3.23|6.14|-2.91	0	.
chr13	94542799	94549399	DB_Ctrl_dev_H3K27me3_P39_vs_E14_down_1351|2.57|5.97|-3.4	0	.
chr11	75791599	75805599	DB_Ctrl_dev_H3K27me3_P39_vs_E14_down_1353|6.12|7.55|-1.44	0	.
chr15	75562399	75568199	DB_Ctrl_dev_H3K27me3_P39_vs_E14_down_1354|1.3|5.84|-4.54	0	.
chr17	25944999	25954999	DB_Ctrl_dev_H3K27me3_P39_vs_E14_down_1356|6.23|7.62|-1.38	0	.
chr7	46346399	46356599	DB_Ctrl_dev_H3K27me3_P39_vs_E14_down_1357|5.69|7.29|-1.6	0	.
chr2	168048199	168053799	DB_Ctrl_dev_H3K27me3_P39_vs_E14_down_1359|5.6|7.25|-1.65	0	.
chr15	85656799	85662199	DB_Ctrl_dev_H3K27me3_P39_vs_E14_down_1360|0.98|5.85|-4.87	0	.
chr18	86393199	86398599	DB_Ctrl_dev_H3K27me3_P39_vs_E14_down_1361|-0.01|6.15|-6.16	0	.
chr18	60621799	60625599	DB_Ctrl_dev_H3K27me3_P39_vs_E14_down_1362|-0.01|6.16|-6.17	0	.
chr6	114965399	114972599	DB_Ctrl_dev_H3K27me3_P39_vs_E14_down_1363|3.62|6.39|-2.77	0	.
chr8	71629599	71640399	DB_Ctrl_dev_H3K27me3_P39_vs_E14_down_1364|-0.01|6.14|-6.16	0	.
chr15	41787199	41792999	DB_Ctrl_dev_H3K27me3_P39_vs_E14_down_1365|-0.01|6.14|-6.16	0	.
chr4	117093399	117098799	DB_Ctrl_dev_H3K27me3_P39_vs_E14_down_1367|3.68|6.35|-2.67	0	.
chr2	129030399	129042199	DB_Ctrl_dev_H3K27me3_P39_vs_E14_down_1370|4.38|6.65|-2.27	0	.
chr2	158372999	158379799	DB_Ctrl_dev_H3K27me3_P39_vs_E14_down_1371|4.41|6.74|-2.34	0	.
chr11	97456399	97464799	DB_Ctrl_dev_H3K27me3_P39_vs_E14_down_1372|-0.01|6.15|-6.16	0	.
chr9	122593399	122598999	DB_Ctrl_dev_H3K27me3_P39_vs_E14_down_1373|-0.01|6.13|-6.15	0	.
chr5	101818399	101830599	DB_Ctrl_dev_H3K27me3_P39_vs_E14_down_1374|-0.01|6.13|-6.15	0	.
chr7	101417199	101422199	DB_Ctrl_dev_H3K27me3_P39_vs_E14_down_1375|-0.01|6.16|-6.17	0	.
chr17	32390399	32401199	DB_Ctrl_dev_H3K27me3_P39_vs_E14_down_1376|6.62|7.92|-1.3	0	.
chr3	97521399	97529999	DB_Ctrl_dev_H3K27me3_P39_vs_E14_down_1377|3.31|6.16|-2.85	0	.
chr8	119445199	119450799	DB_Ctrl_dev_H3K27me3_P39_vs_E14_down_1378|4.27|6.55|-2.28	0	.
chr5	117246399	117253399	DB_Ctrl_dev_H3K27me3_P39_vs_E14_down_1379|1.57|5.79|-4.23	0	.
chr11	120716799	120723599	DB_Ctrl_dev_H3K27me3_P39_vs_E14_down_1380|0.99|5.86|-4.87	0	.
chr14	57101599	57108999	DB_Ctrl_dev_H3K27me3_P39_vs_E14_down_1381|6.18|7.65|-1.47	0	.
chr7	44360599	44364399	DB_Ctrl_dev_H3K27me3_P39_vs_E14_down_1382|2.15|5.95|-3.8	0	.
chr7	109005399	109014999	DB_Ctrl_dev_H3K27me3_P39_vs_E14_down_1383|3.74|6.33|-2.59	0	.
chr9	21024999	21043199	DB_Ctrl_dev_H3K27me3_P39_vs_E14_down_1384|4.33|8.97|-4.64	0	.
chr9	122616599	122623199	DB_Ctrl_dev_H3K27me3_P39_vs_E14_down_1385|0.98|5.81|-4.83	0	.
chr19	24222399	24227799	DB_Ctrl_dev_H3K27me3_P39_vs_E14_down_1387|4.89|6.89|-2	0	.
chr4	42931999	42939999	DB_Ctrl_dev_H3K27me3_P39_vs_E14_down_1388|2.3|6.02|-3.72	0	.
chr4	99644799	99671199	DB_Ctrl_dev_H3K27me3_P39_vs_E14_down_1389|8.71|9.58|-0.87	0	.
chr10	123263999	123268599	DB_Ctrl_dev_H3K27me3_P39_vs_E14_down_1390|-0.01|6.12|-6.13	0	.
chr18	38070599	38077199	DB_Ctrl_dev_H3K27me3_P39_vs_E14_down_1391|3.98|6.49|-2.51	0	.
chr3	116711199	116715799	DB_Ctrl_dev_H3K27me3_P39_vs_E14_down_1392|1.78|5.84|-4.06	0	.
chr7	4149399	4154199	DB_Ctrl_dev_H3K27me3_P39_vs_E14_down_1394|-0.01|6.14|-6.15	0	.
chr10	121473799	121477799	DB_Ctrl_dev_H3K27me3_P39_vs_E14_down_1395|2.17|5.92|-3.75	0	.
chr7	70312399	70379599	DB_Ctrl_dev_H3K27me3_P39_vs_E14_down_1397|10.18|10.85|-0.67	0	.
chr18	59172599	59178599	DB_Ctrl_dev_H3K27me3_P39_vs_E14_down_1398|-0.01|6.1|-6.12	0	.
chr9	46784599	46792799	DB_Ctrl_dev_H3K27me3_P39_vs_E14_down_1400|-0.01|6.1|-6.12	0	.
chr2	127535999	127545399	DB_Ctrl_dev_H3K27me3_P39_vs_E14_down_1401|5.64|7.28|-1.64	0	.
chr8	71378799	71381799	DB_Ctrl_dev_H3K27me3_P39_vs_E14_down_1402|-0.01|6.1|-6.11	0	.
chr18	38256599	38266799	DB_Ctrl_dev_H3K27me3_P39_vs_E14_down_1403|1.3|5.79|-4.49	0	.
chr2	52673599	52680999	DB_Ctrl_dev_H3K27me3_P39_vs_E14_down_1404|-0.01|6.1|-6.11	0	.
chr19	23890799	23894799	DB_Ctrl_dev_H3K27me3_P39_vs_E14_down_1406|-0.01|6.09|-6.1	0	.
chr17	51828799	51834999	DB_Ctrl_dev_H3K27me3_P39_vs_E14_down_1407|3.68|6.45|-2.77	0	.
chr11	111064799	111069399	DB_Ctrl_dev_H3K27me3_P39_vs_E14_down_1408|0.58|5.87|-5.3	0	.
chr11	100412799	100421399	DB_Ctrl_dev_H3K27me3_P39_vs_E14_down_1409|4.84|6.83|-1.99	0	.
chr15	83674999	83683399	DB_Ctrl_dev_H3K27me3_P39_vs_E14_down_1411|2.17|5.92|-3.75	0	.
chr4	115045799	115069999	DB_Ctrl_dev_H3K27me3_P39_vs_E14_down_1412|8.65|9.44|-0.8	0	.
chr7	95683799	95693999	DB_Ctrl_dev_H3K27me3_P39_vs_E14_down_1413|4.76|6.79|-2.03	0	.
chr1	79668799	79676399	DB_Ctrl_dev_H3K27me3_P39_vs_E14_down_1414|3.99|6.41|-2.43	0	.
chr17	69430999	69443799	DB_Ctrl_dev_H3K27me3_P39_vs_E14_down_1415|6.27|7.66|-1.38	0	.
chr9	89736399	89739999	DB_Ctrl_dev_H3K27me3_P39_vs_E14_down_1416|0.98|5.78|-4.8	0	.
chr2	19908599	19912999	DB_Ctrl_dev_H3K27me3_P39_vs_E14_down_1419|2.99|6.04|-3.05	0	.
chr11	57823599	57846599	DB_Ctrl_dev_H3K27me3_P39_vs_E14_down_1420|8.66|9.44|-0.78	0	.
chr16	3231599	3236999	DB_Ctrl_dev_H3K27me3_P39_vs_E14_down_1421|-0.01|6.07|-6.09	0	.
chr11	98538399	98550799	DB_Ctrl_dev_H3K27me3_P39_vs_E14_down_1422|6.71|7.93|-1.22	0	.
chr11	32219999	32224799	DB_Ctrl_dev_H3K27me3_P39_vs_E14_down_1423|4.63|6.72|-2.09	0	.
chr11	73018599	73022799	DB_Ctrl_dev_H3K27me3_P39_vs_E14_down_1424|1.32|5.77|-4.46	0	.
chr13	21988599	22022999	DB_Ctrl_dev_H3K27me3_P39_vs_E14_down_1425|8.86|9.61|-0.75	0	.
chr17	27683999	27690199	DB_Ctrl_dev_H3K27me3_P39_vs_E14_down_1426|-0.01|6.07|-6.08	0	.
chr7	139243199	139249399	DB_Ctrl_dev_H3K27me3_P39_vs_E14_down_1427|-0.01|6.08|-6.09	0	.
chr8	94170999	94174999	DB_Ctrl_dev_H3K27me3_P39_vs_E14_down_1428|4.76|6.79|-2.03	0	.
chr7	24437199	24445999	DB_Ctrl_dev_H3K27me3_P39_vs_E14_down_1430|0.58|5.84|-5.26	0	.
chr15	92394799	92398399	DB_Ctrl_dev_H3K27me3_P39_vs_E14_down_1434|-0.01|6.06|-6.08	0	.
chr15	93514399	93520999	DB_Ctrl_dev_H3K27me3_P39_vs_E14_down_1435|-0.01|6.06|-6.08	0	.
chr11	35609199	35615599	DB_Ctrl_dev_H3K27me3_P39_vs_E14_down_1436|2.14|5.91|-3.76	0	.
chr10	80572599	80581799	DB_Ctrl_dev_H3K27me3_P39_vs_E14_down_1437|-0.01|6.06|-6.07	0	.
chr5	147123799	147169199	DB_Ctrl_dev_H3K27me3_P39_vs_E14_down_1439|8.13|9|-0.87	0	.
chr15	103142799	103150599	DB_Ctrl_dev_H3K27me3_P39_vs_E14_down_1440|2.43|5.99|-3.56	0	.
chr12	117048199	117053999	DB_Ctrl_dev_H3K27me3_P39_vs_E14_down_1441|3.89|6.36|-2.47	0	.
chr2	18677599	18682599	DB_Ctrl_dev_H3K27me3_P39_vs_E14_down_1442|-0.01|6.06|-6.07	0	.
chr12	17171799	17177799	DB_Ctrl_dev_H3K27me3_P39_vs_E14_down_1443|-0.01|6.05|-6.07	0	.
chr7	110766799	110769799	DB_Ctrl_dev_H3K27me3_P39_vs_E14_down_1444|-0.01|6.05|-6.07	0	.
chr1	9962599	9971799	DB_Ctrl_dev_H3K27me3_P39_vs_E14_down_1445|6.09|7.53|-1.44	0	.
chr6	31562199	31567599	DB_Ctrl_dev_H3K27me3_P39_vs_E14_down_1447|2.89|6.01|-3.12	0	.
chr4	133596999	133604199	DB_Ctrl_dev_H3K27me3_P39_vs_E14_down_1448|6.32|7.67|-1.35	0	.
chr2	5709199	5715599	DB_Ctrl_dev_H3K27me3_P39_vs_E14_down_1449|1.3|5.76|-4.47	0	.
chr6	118591399	118595999	DB_Ctrl_dev_H3K27me3_P39_vs_E14_down_1450|0.98|5.8|-4.82	0	.
chr16	5118799	5134399	DB_Ctrl_dev_H3K27me3_P39_vs_E14_down_1451|6.75|7.97|-1.22	0	.
chr9	21151999	21159599	DB_Ctrl_dev_H3K27me3_P39_vs_E14_down_1452|3.22|6.2|-2.97	0	.
chr18	38991199	38995799	DB_Ctrl_dev_H3K27me3_P39_vs_E14_down_1454|2.45|5.9|-3.45	0	.
chr13	94857399	94902599	DB_Ctrl_dev_H3K27me3_P39_vs_E14_down_1455|9.41|10.09|-0.68	0	.
chr17	45597999	45602399	DB_Ctrl_dev_H3K27me3_P39_vs_E14_down_1456|4.2|6.49|-2.29	0	.
chr4	63492599	63495999	DB_Ctrl_dev_H3K27me3_P39_vs_E14_down_1457|4.2|6.49|-2.29	0	.
chr3	92079199	92084799	DB_Ctrl_dev_H3K27me3_P39_vs_E14_down_1458|2.17|7.42|-5.25	0	.
chr6	90982799	90990399	DB_Ctrl_dev_H3K27me3_P39_vs_E14_down_1459|3.99|6.4|-2.42	0	.
chr1	21959599	21965199	DB_Ctrl_dev_H3K27me3_P39_vs_E14_down_1460|-0.01|6.04|-6.05	0	.
chr10	3365399	3368799	DB_Ctrl_dev_H3K27me3_P39_vs_E14_down_1461|2.31|5.84|-3.53	0	.
chr15	57692199	57696799	DB_Ctrl_dev_H3K27me3_P39_vs_E14_down_1462|2.17|5.89|-3.72	0	.
chr4	134245599	134259399	DB_Ctrl_dev_H3K27me3_P39_vs_E14_down_1463|6.93|8.07|-1.14	0	.
chr5	107226199	107256399	DB_Ctrl_dev_H3K27me3_P39_vs_E14_down_1465|7.13|8.21|-1.07	0	.
chr7	75306999	75310199	DB_Ctrl_dev_H3K27me3_P39_vs_E14_down_1466|0.58|5.81|-5.24	0	.
chr7	35582399	35585599	DB_Ctrl_dev_H3K27me3_P39_vs_E14_down_1467|4.57|6.7|-2.13	0	.
chr10	90967199	90970799	DB_Ctrl_dev_H3K27me3_P39_vs_E14_down_1468|-0.01|6.04|-6.05	0	.
chr1	91050199	91056599	DB_Ctrl_dev_H3K27me3_P39_vs_E14_down_1469|0.57|5.81|-5.24	0	.
chr7	19310599	19321199	DB_Ctrl_dev_H3K27me3_P39_vs_E14_down_1471|4.57|6.66|-2.09	0	.
chr16	20733199	20736199	DB_Ctrl_dev_H3K27me3_P39_vs_E14_down_1472|-0.01|6.02|-6.04	0	.
chr9	87142599	87145999	DB_Ctrl_dev_H3K27me3_P39_vs_E14_down_1473|2.7|6.02|-3.32	0	.
chr18	80294399	80300799	DB_Ctrl_dev_H3K27me3_P39_vs_E14_down_1474|3.51|6.24|-2.73	0	.
chr11	59960599	59966199	DB_Ctrl_dev_H3K27me3_P39_vs_E14_down_1475|4.34|6.55|-2.21	0	.
chr2	146945199	146962399	DB_Ctrl_dev_H3K27me3_P39_vs_E14_down_1477|6.35|7.67|-1.32	0	.
chr6	105676999	105679599	DB_Ctrl_dev_H3K27me3_P39_vs_E14_down_1478|0.58|5.8|-5.23	0	.
chr11	4116999	4123399	DB_Ctrl_dev_H3K27me3_P39_vs_E14_down_1479|0.98|5.74|-4.77	0	.
chr2	168908999	168913999	DB_Ctrl_dev_H3K27me3_P39_vs_E14_down_1480|5.56|7.2|-1.64	0	.
chr4	129118399	129121999	DB_Ctrl_dev_H3K27me3_P39_vs_E14_down_1483|-0.01|6.02|-6.03	0	.
chr9	48788199	48800199	DB_Ctrl_dev_H3K27me3_P39_vs_E14_down_1485|-0.01|6.02|-6.03	0	.
chr9	40958399	40967199	DB_Ctrl_dev_H3K27me3_P39_vs_E14_down_1486|5.23|7.06|-1.83	0	.
chr1	62927999	62941599	DB_Ctrl_dev_H3K27me3_P39_vs_E14_down_1487|5.53|7.23|-1.71	0	.
chr7	108960399	108967599	DB_Ctrl_dev_H3K27me3_P39_vs_E14_down_1488|1.58|5.76|-4.18	0	.
chr16	94119799	94128799	DB_Ctrl_dev_H3K27me3_P39_vs_E14_down_1489|5.49|7.16|-1.66	0	.
chr1	86017399	86023599	DB_Ctrl_dev_H3K27me3_P39_vs_E14_down_1490|4.16|6.46|-2.3	0	.
chr12	111905399	111912399	DB_Ctrl_dev_H3K27me3_P39_vs_E14_down_1492|-0.01|6.02|-6.04	0	.
chr7	19399199	19408199	DB_Ctrl_dev_H3K27me3_P39_vs_E14_down_1493|6.11|7.54|-1.43	0	.
chr12	78902399	78916399	DB_Ctrl_dev_H3K27me3_P39_vs_E14_down_1494|6.59|7.82|-1.23	0	.
chr7	101450599	101459799	DB_Ctrl_dev_H3K27me3_P39_vs_E14_down_1495|-0.01|6|-6.02	0	.
chr7	29244199	29249599	DB_Ctrl_dev_H3K27me3_P39_vs_E14_down_1496|0.58|5.79|-5.21	0	.
chr19	58856799	58864799	DB_Ctrl_dev_H3K27me3_P39_vs_E14_down_1497|-0.01|6|-6.02	0	.
chr17	63172199	63178799	DB_Ctrl_dev_H3K27me3_P39_vs_E14_down_1498|2.14|5.86|-3.72	0	.
chr8	70801999	70805399	DB_Ctrl_dev_H3K27me3_P39_vs_E14_down_1499|-0.01|6|-6.01	0	.
chr6	38348399	38358599	DB_Ctrl_dev_H3K27me3_P39_vs_E14_down_1500|7.07|8.15|-1.08	0	.
chr1	133362999	133366399	DB_Ctrl_dev_H3K27me3_P39_vs_E14_down_1502|3.16|6.05|-2.9	0	.
chr19	56769199	56778199	DB_Ctrl_dev_H3K27me3_P39_vs_E14_down_1503|3.94|6.39|-2.46	0	.
chr1	135694999	135702399	DB_Ctrl_dev_H3K27me3_P39_vs_E14_down_1505|3.44|6.18|-2.74	0	.
chr8	11472999	11487999	DB_Ctrl_dev_H3K27me3_P39_vs_E14_down_1508|7.26|8.28|-1.02	0	.
chr11	102445799	102456999	DB_Ctrl_dev_H3K27me3_P39_vs_E14_down_1510|4.6|6.71|-2.11	0	.
chr11	94931399	94942799	DB_Ctrl_dev_H3K27me3_P39_vs_E14_down_1511|5.54|7.17|-1.63	0	.
chr11	101075199	101081999	DB_Ctrl_dev_H3K27me3_P39_vs_E14_down_1512|5.86|7.37|-1.51	0	.
chr19	46861799	46873399	DB_Ctrl_dev_H3K27me3_P39_vs_E14_down_1513|-0.01|6.04|-6.05	0	.
chr7	70784399	70801799	DB_Ctrl_dev_H3K27me3_P39_vs_E14_down_1514|6.69|7.91|-1.22	0	.
chr7	142388999	142398199	DB_Ctrl_dev_H3K27me3_P39_vs_E14_down_1515|-0.01|5.98|-6	0	.
chr18	39875799	39883399	DB_Ctrl_dev_H3K27me3_P39_vs_E14_down_1516|-0.01|5.99|-6.01	0	.
chr4	46875399	46883799	DB_Ctrl_dev_H3K27me3_P39_vs_E14_down_1517|-0.01|6|-6.01	0	.
chr9	56619199	56622199	DB_Ctrl_dev_H3K27me3_P39_vs_E14_down_1518|-0.01|5.99|-6	0	.
chr8	84984399	84989799	DB_Ctrl_dev_H3K27me3_P39_vs_E14_down_1519|-0.01|5.98|-6	0	.
chr10	4708199	4713799	DB_Ctrl_dev_H3K27me3_P39_vs_E14_down_1520|5.16|7.07|-1.91	0	.
chr3	88500599	88504999	DB_Ctrl_dev_H3K27me3_P39_vs_E14_down_1521|3.07|6.03|-2.96	0	.
chr14	69833599	69843199	DB_Ctrl_dev_H3K27me3_P39_vs_E14_down_1522|-0.01|5.98|-5.99	0	.
chr12	111415599	111435599	DB_Ctrl_dev_H3K27me3_P39_vs_E14_down_1523|7.27|8.4|-1.13	0	.
chr9	63491199	63534599	DB_Ctrl_dev_H3K27me3_P39_vs_E14_down_1524|8.34|9.2|-0.86	0	.
chr10	81329799	81339199	DB_Ctrl_dev_H3K27me3_P39_vs_E14_down_1525|4.76|6.75|-1.99	0	.
chr2	178411399	178414799	DB_Ctrl_dev_H3K27me3_P39_vs_E14_down_1526|-0.01|5.97|-5.98	0	.
chr10	43018399	43022799	DB_Ctrl_dev_H3K27me3_P39_vs_E14_down_1527|-0.01|5.98|-5.99	0	.
chr4	152028199	152035199	DB_Ctrl_dev_H3K27me3_P39_vs_E14_down_1528|2.14|5.85|-3.71	0	.
chr12	87053599	87059599	DB_Ctrl_dev_H3K27me3_P39_vs_E14_down_1529|2.56|5.94|-3.38	0	.
chr12	105560199	105565599	DB_Ctrl_dev_H3K27me3_P39_vs_E14_down_1530|4.89|6.8|-1.91	0	.
chr17	24544599	24552399	DB_Ctrl_dev_H3K27me3_P39_vs_E14_down_1531|-0.01|5.96|-5.98	0	.
chr5	113011799	113017399	DB_Ctrl_dev_H3K27me3_P39_vs_E14_down_1532|1.79|5.73|-3.94	0	.
chr13	31552999	31571399	DB_Ctrl_dev_H3K27me3_P39_vs_E14_down_1533|7.63|8.6|-0.97	0	.
chr8	121063199	121094199	DB_Ctrl_dev_H3K27me3_P39_vs_E14_down_1534|9.22|9.99|-0.78	0	.
chr7	144936799	144945199	DB_Ctrl_dev_H3K27me3_P39_vs_E14_down_1535|6.07|7.48|-1.41	0	.
chr14	27333599	27337799	DB_Ctrl_dev_H3K27me3_P39_vs_E14_down_1536|-0.01|5.95|-5.97	0	.
chr19	4264999	4270999	DB_Ctrl_dev_H3K27me3_P39_vs_E14_down_1538|0.58|5.75|-5.18	0	.
chr4	119321799	119331399	DB_Ctrl_dev_H3K27me3_P39_vs_E14_down_1539|-0.01|5.96|-5.97	0	.
chr14	124190399	124195799	DB_Ctrl_dev_H3K27me3_P39_vs_E14_down_1540|4.41|6.57|-2.16	0	.
chr4	139799799	139856599	DB_Ctrl_dev_H3K27me3_P39_vs_E14_down_1541|9.61|10.32|-0.72	0	.
chr5	38273199	38280999	DB_Ctrl_dev_H3K27me3_P39_vs_E14_down_1543|6.73|7.95|-1.22	0	.
chr11	67451799	67458199	DB_Ctrl_dev_H3K27me3_P39_vs_E14_down_1544|4.51|6.63|-2.13	0	.
chr5	35309199	35316599	DB_Ctrl_dev_H3K27me3_P39_vs_E14_down_1545|-0.01|5.95|-5.96	0	.
chr9	108102999	108112599	DB_Ctrl_dev_H3K27me3_P39_vs_E14_down_1546|-0.01|5.97|-5.99	0	.
chr1	134297799	134301599	DB_Ctrl_dev_H3K27me3_P39_vs_E14_down_1547|3.56|6.32|-2.76	0	.
chr11	78057799	78067399	DB_Ctrl_dev_H3K27me3_P39_vs_E14_down_1549|0.99|5.69|-4.7	0	.
chr12	4838599	4845799	DB_Ctrl_dev_H3K27me3_P39_vs_E14_down_1550|-0.01|5.94|-5.96	0	.
chr8	70109399	70117999	DB_Ctrl_dev_H3K27me3_P39_vs_E14_down_1551|2.98|5.99|-3.01	0	.
chr11	68138599	68151599	DB_Ctrl_dev_H3K27me3_P39_vs_E14_down_1552|5.61|7.2|-1.58	0	.
chr4	114894599	114947199	DB_Ctrl_dev_H3K27me3_P39_vs_E14_down_1553|9.64|10.29|-0.64	0	.
chr6	86806999	86814799	DB_Ctrl_dev_H3K27me3_P39_vs_E14_down_1554|2.32|5.85|-3.53	0	.
chr6	23836199	23841399	DB_Ctrl_dev_H3K27me3_P39_vs_E14_down_1555|3.56|6.34|-2.78	0	.
chr9	59679799	59684799	DB_Ctrl_dev_H3K27me3_P39_vs_E14_down_1556|-0.01|5.94|-5.95	0	.
chr9	120364399	120371199	DB_Ctrl_dev_H3K27me3_P39_vs_E14_down_1557|-0.01|5.93|-5.95	0	.
chr19	45729599	45746599	DB_Ctrl_dev_H3K27me3_P39_vs_E14_down_1559|8.02|8.87|-0.85	0	.
chr5	135373599	135383599	DB_Ctrl_dev_H3K27me3_P39_vs_E14_down_1560|-0.01|5.95|-5.96	0	.
chr12	100897999	100899999	DB_Ctrl_dev_H3K27me3_P39_vs_E14_down_1561|0.57|5.74|-5.17	0	.
chr17	24647999	24653199	DB_Ctrl_dev_H3K27me3_P39_vs_E14_down_1563|-0.01|5.93|-5.94	0	.
chr6	29520399	29531399	DB_Ctrl_dev_H3K27me3_P39_vs_E14_down_1564|6.85|7.97|-1.12	0	.
chr2	31307799	31319599	DB_Ctrl_dev_H3K27me3_P39_vs_E14_down_1565|6.77|7.93|-1.16	0	.
chr19	44821399	44842799	DB_Ctrl_dev_H3K27me3_P39_vs_E14_down_1566|7.83|8.75|-0.92	0	.
chr19	45580199	45589999	DB_Ctrl_dev_H3K27me3_P39_vs_E14_down_1567|3.5|6.2|-2.7	0	.
chr19	41163399	41193799	DB_Ctrl_dev_H3K27me3_P39_vs_E14_down_1568|7.45|8.44|-0.99	0	.
chr18	74953399	74963999	DB_Ctrl_dev_H3K27me3_P39_vs_E14_down_1569|4.94|6.82|-1.88	0	.
chr15	98293599	98298399	DB_Ctrl_dev_H3K27me3_P39_vs_E14_down_1570|0.57|5.72|-5.16	0	.
chr2	92482799	92486399	DB_Ctrl_dev_H3K27me3_P39_vs_E14_down_1571|1.32|5.7|-4.39	0	.
chr15	74668799	74674799	DB_Ctrl_dev_H3K27me3_P39_vs_E14_down_1572|2.3|5.89|-3.59	0	.
chr17	8338399	8342999	DB_Ctrl_dev_H3K27me3_P39_vs_E14_down_1573|1.32|5.7|-4.39	0	.
chr2	139673599	139681399	DB_Ctrl_dev_H3K27me3_P39_vs_E14_down_1574|4.19|6.57|-2.38	0	.
chr2	26118999	26124999	DB_Ctrl_dev_H3K27me3_P39_vs_E14_down_1575|5.46|7.12|-1.66	0	.
chr1	153422999	153427999	DB_Ctrl_dev_H3K27me3_P39_vs_E14_down_1578|2.14|5.82|-3.68	0	.
chr17	35190399	35211199	DB_Ctrl_dev_H3K27me3_P39_vs_E14_down_1579|6.66|7.86|-1.2	0	.
chr15	78671199	78674599	DB_Ctrl_dev_H3K27me3_P39_vs_E14_down_1581|-0.01|5.94|-5.95	0	.
chr9	21309399	21313999	DB_Ctrl_dev_H3K27me3_P39_vs_E14_down_1582|4.27|6.49|-2.22	0	.
chr6	122799199	122804399	DB_Ctrl_dev_H3K27me3_P39_vs_E14_down_1584|2.89|5.92|-3.03	0	.
chr13	73254199	73275999	DB_Ctrl_dev_H3K27me3_P39_vs_E14_down_1585|8.74|9.53|-0.79	0	.
chr5	27840999	27846599	DB_Ctrl_dev_H3K27me3_P39_vs_E14_down_1587|2.88|6.06|-3.18	0	.
chr17	47084999	47095399	DB_Ctrl_dev_H3K27me3_P39_vs_E14_down_1589|1.8|5.79|-3.98	0	.
chr1	89578799	89583599	DB_Ctrl_dev_H3K27me3_P39_vs_E14_down_1590|-0.01|5.9|-5.91	0	.
chr13	57902399	57909399	DB_Ctrl_dev_H3K27me3_P39_vs_E14_down_1591|-0.01|5.9|-5.91	0	.
chr5	35055999	35061199	DB_Ctrl_dev_H3K27me3_P39_vs_E14_down_1592|-0.01|5.9|-5.91	0	.
chr11	98491599	98505999	DB_Ctrl_dev_H3K27me3_P39_vs_E14_down_1593|5.92|7.36|-1.44	0	.
chr5	28141199	28190799	DB_Ctrl_dev_H3K27me3_P39_vs_E14_down_1594|9.51|10.2|-0.69	0	.
chr7	122669599	122672599	DB_Ctrl_dev_H3K27me3_P39_vs_E14_down_1595|-0.01|5.89|-5.91	0	.
chr13	55819799	55849599	DB_Ctrl_dev_H3K27me3_P39_vs_E14_down_1596|9.11|9.86|-0.75	0	.
chr16	34667399	34673399	DB_Ctrl_dev_H3K27me3_P39_vs_E14_down_1597|1.3|5.66|-4.36	0	.
chr11	104047399	104055399	DB_Ctrl_dev_H3K27me3_P39_vs_E14_down_1598|0.57|5.71|-5.15	0	.
chr9	29514199	29523599	DB_Ctrl_dev_H3K27me3_P39_vs_E14_down_1599|-0.01|5.9|-5.91	0	.
chr2	31467999	31476199	DB_Ctrl_dev_H3K27me3_P39_vs_E14_down_1601|5.34|7.03|-1.69	0	.
chr4	44502199	44535999	DB_Ctrl_dev_H3K27me3_P39_vs_E14_down_1602|8.23|9.04|-0.81	0	.
chr10	26074999	26078999	DB_Ctrl_dev_H3K27me3_P39_vs_E14_down_1604|0.57|5.69|-5.13	0	.
chr12	31261599	31268199	DB_Ctrl_dev_H3K27me3_P39_vs_E14_down_1605|4.08|6.51|-2.44	0	.
chr15	82068799	82073799	DB_Ctrl_dev_H3K27me3_P39_vs_E14_down_1606|4.15|6.41|-2.26	0	.
chr7	130928799	130939799	DB_Ctrl_dev_H3K27me3_P39_vs_E14_down_1608|6.79|8.01|-1.22	0	.
chr11	69933199	69941599	DB_Ctrl_dev_H3K27me3_P39_vs_E14_down_1609|4.2|6.51|-2.31	0	.
chr12	117124399	117132999	DB_Ctrl_dev_H3K27me3_P39_vs_E14_down_1610|2.99|5.95|-2.96	0	.
chr4	133210399	133215799	DB_Ctrl_dev_H3K27me3_P39_vs_E14_down_1612|-0.01|5.89|-5.9	0	.
chr6	89357599	89366799	DB_Ctrl_dev_H3K27me3_P39_vs_E14_down_1615|-0.01|5.88|-5.9	0	.
chr6	25687799	25690399	DB_Ctrl_dev_H3K27me3_P39_vs_E14_down_1618|1.3|5.65|-4.36	0	.
chr7	97735199	97739799	DB_Ctrl_dev_H3K27me3_P39_vs_E14_down_1619|0.58|5.69|-5.12	0	.
chr14	39471399	39475999	DB_Ctrl_dev_H3K27me3_P39_vs_E14_down_1620|0.57|5.69|-5.12	0	.
chr8	71652199	71656599	DB_Ctrl_dev_H3K27me3_P39_vs_E14_down_1621|2.89|5.9|-3.01	0	.
chr1	153068399	153074599	DB_Ctrl_dev_H3K27me3_P39_vs_E14_down_1624|-0.01|5.87|-5.88	0	.
chr11	4217199	4220999	DB_Ctrl_dev_H3K27me3_P39_vs_E14_down_1625|3.24|6.13|-2.89	0	.
chr9	56763199	56769199	DB_Ctrl_dev_H3K27me3_P39_vs_E14_down_1626|-0.01|5.87|-5.88	0	.
chr3	33138599	33143199	DB_Ctrl_dev_H3K27me3_P39_vs_E14_down_1627|3.08|5.96|-2.89	0	.
chr10	79633399	79640799	DB_Ctrl_dev_H3K27me3_P39_vs_E14_down_1629|-0.01|5.86|-5.88	0	.
chr17	26070199	26074999	DB_Ctrl_dev_H3K27me3_P39_vs_E14_down_1631|2.3|5.75|-3.45	0	.
chr3	97864799	97869999	DB_Ctrl_dev_H3K27me3_P39_vs_E14_down_1632|-0.01|5.91|-5.92	0	.
chrX	140595999	140601199	DB_Ctrl_dev_H3K27me3_P39_vs_E14_down_1634|4.66|6.65|-1.99	0	.
chr2	121294399	121305599	DB_Ctrl_dev_H3K27me3_P39_vs_E14_down_1635|-0.01|5.87|-5.89	0	.
chr3	88015599	88042599	DB_Ctrl_dev_H3K27me3_P39_vs_E14_down_1636|7.82|8.7|-0.88	0	.
chr4	155149199	155152399	DB_Ctrl_dev_H3K27me3_P39_vs_E14_down_1639|2.68|5.89|-3.22	0	.
chr12	117027799	117034799	DB_Ctrl_dev_H3K27me3_P39_vs_E14_down_1640|1.32|5.64|-4.32	0	.
chr14	74638599	74643399	DB_Ctrl_dev_H3K27me3_P39_vs_E14_down_1641|3.84|6.28|-2.43	0	.
chr11	85871199	85902399	DB_Ctrl_dev_H3K27me3_P39_vs_E14_down_1642|8.89|9.61|-0.72	0	.
chr12	31545799	31564799	DB_Ctrl_dev_H3K27me3_P39_vs_E14_down_1643|6.93|8.07|-1.14	0	.
chr14	15435399	15439599	DB_Ctrl_dev_H3K27me3_P39_vs_E14_down_1644|0.57|5.67|-5.1	0	.
chr8	94207399	94215199	DB_Ctrl_dev_H3K27me3_P39_vs_E14_down_1645|-0.01|5.85|-5.86	0	.
chr11	59279999	59302599	DB_Ctrl_dev_H3K27me3_P39_vs_E14_down_1647|7.95|8.86|-0.91	0	.
chr4	152145599	152167399	DB_Ctrl_dev_H3K27me3_P39_vs_E14_down_1649|7.96|8.9|-0.94	0	.
chr18	64262599	64267399	DB_Ctrl_dev_H3K27me3_P39_vs_E14_down_1651|0.57|5.68|-5.11	0	.
chr5	115479399	115483199	DB_Ctrl_dev_H3K27me3_P39_vs_E14_down_1652|-0.01|5.85|-5.86	0	.
chr3	121256999	121268799	DB_Ctrl_dev_H3K27me3_P39_vs_E14_down_1653|4.76|6.76|-2	0	.
chr11	104307999	104313399	DB_Ctrl_dev_H3K27me3_P39_vs_E14_down_1654|-0.01|5.84|-5.86	0	.
chr18	77791999	77797599	DB_Ctrl_dev_H3K27me3_P39_vs_E14_down_1655|5.5|7.18|-1.69	0	.
chr19	43439999	43445599	DB_Ctrl_dev_H3K27me3_P39_vs_E14_down_1656|-0.01|5.84|-5.85	0	.
chr8	84009999	84015999	DB_Ctrl_dev_H3K27me3_P39_vs_E14_down_1657|6.04|7.53|-1.49	0	.
chr11	98831399	98839999	DB_Ctrl_dev_H3K27me3_P39_vs_E14_down_1658|-0.01|5.86|-5.88	0	.
chr7	45171799	45187399	DB_Ctrl_dev_H3K27me3_P39_vs_E14_down_1660|4.04|8.77|-4.73	0	.
chr8	124431199	124436999	DB_Ctrl_dev_H3K27me3_P39_vs_E14_down_1662|-0.01|5.84|-5.85	0	.
chr11	103331399	103336199	DB_Ctrl_dev_H3K27me3_P39_vs_E14_down_1663|-0.01|5.84|-5.86	0	.
chr12	116483399	116487999	DB_Ctrl_dev_H3K27me3_P39_vs_E14_down_1664|1.56|5.65|-4.09	0	.
chr18	24651199	24656999	DB_Ctrl_dev_H3K27me3_P39_vs_E14_down_1665|5.36|7.05|-1.69	0	.
chr18	61031999	61046199	DB_Ctrl_dev_H3K27me3_P39_vs_E14_down_1666|6.69|7.88|-1.19	0	.
chr5	63808799	63816199	DB_Ctrl_dev_H3K27me3_P39_vs_E14_down_1670|3.89|6.29|-2.4	0	.
chr1	86667799	86672999	DB_Ctrl_dev_H3K27me3_P39_vs_E14_down_1672|2.3|5.75|-3.45	0	.
chr18	5160799	5168399	DB_Ctrl_dev_H3K27me3_P39_vs_E14_down_1673|3.74|6.2|-2.46	0	.
chr13	63556199	63562599	DB_Ctrl_dev_H3K27me3_P39_vs_E14_down_1674|3.89|6.3|-2.41	0	.
chr11	68944399	68950199	DB_Ctrl_dev_H3K27me3_P39_vs_E14_down_1675|1.97|5.74|-3.76	0	.
chr9	48693599	48699199	DB_Ctrl_dev_H3K27me3_P39_vs_E14_down_1676|1.97|5.74|-3.76	0	.
chr8	84410799	84417599	DB_Ctrl_dev_H3K27me3_P39_vs_E14_down_1677|-0.01|5.82|-5.84	0	.
chr14	21977999	22000599	DB_Ctrl_dev_H3K27me3_P39_vs_E14_down_1678|8.64|9.49|-0.85	0	.
chr1	72533799	72537399	DB_Ctrl_dev_H3K27me3_P39_vs_E14_down_1679|-0.01|5.85|-5.86	0	.
chr19	46002399	46006999	DB_Ctrl_dev_H3K27me3_P39_vs_E14_down_1681|1.99|5.66|-3.68	0	.
chr18	64322999	64354599	DB_Ctrl_dev_H3K27me3_P39_vs_E14_down_1682|8.86|9.64|-0.78	0	.
chr15	54743199	54748399	DB_Ctrl_dev_H3K27me3_P39_vs_E14_down_1683|2.43|5.9|-3.46	0	.
chr15	100871199	100874399	DB_Ctrl_dev_H3K27me3_P39_vs_E14_down_1684|1.78|5.68|-3.9	0	.
chr18	62261599	62270199	DB_Ctrl_dev_H3K27me3_P39_vs_E14_down_1685|5.03|6.85|-1.82	0	.
chr1	87148399	87162999	DB_Ctrl_dev_H3K27me3_P39_vs_E14_down_1686|7.35|8.4|-1.04	0	.
chr10	71157799	71161399	DB_Ctrl_dev_H3K27me3_P39_vs_E14_down_1687|-0.01|5.83|-5.84	0	.
chr11	97013399	97027799	DB_Ctrl_dev_H3K27me3_P39_vs_E14_down_1688|7.72|8.74|-1.02	0	.
chr9	27299799	27304599	DB_Ctrl_dev_H3K27me3_P39_vs_E14_down_1689|0.99|5.6|-4.61	0	.
chr19	45327999	45332199	DB_Ctrl_dev_H3K27me3_P39_vs_E14_down_1690|2.45|5.77|-3.32	0	.
chr16	18121599	18128999	DB_Ctrl_dev_H3K27me3_P39_vs_E14_down_1691|2.69|5.82|-3.13	0	.
chr17	86747799	86760999	DB_Ctrl_dev_H3K27me3_P39_vs_E14_down_1692|6.97|8.04|-1.07	0	.
chr3	26326199	26336399	DB_Ctrl_dev_H3K27me3_P39_vs_E14_down_1693|2.9|5.94|-3.04	0	.
chr4	46819599	46826199	DB_Ctrl_dev_H3K27me3_P39_vs_E14_down_1694|2.57|5.79|-3.22	0	.
chr2	11702999	11708799	DB_Ctrl_dev_H3K27me3_P39_vs_E14_down_1697|-0.01|5.8|-5.82	0	.
chr18	38077999	38084799	DB_Ctrl_dev_H3K27me3_P39_vs_E14_down_1698|-0.01|5.81|-5.82	0	.
chr7	105424199	105428799	DB_Ctrl_dev_H3K27me3_P39_vs_E14_down_1699|2.57|5.78|-3.21	0	.
chr11	52772399	52779199	DB_Ctrl_dev_H3K27me3_P39_vs_E14_down_1700|0.57|5.63|-5.06	0	.
chr4	133513799	133523599	DB_Ctrl_dev_H3K27me3_P39_vs_E14_down_1702|6.26|7.58|-1.32	0	.
chr11	102755599	102762399	DB_Ctrl_dev_H3K27me3_P39_vs_E14_down_1703|1.3|5.62|-4.32	0	.
chr17	85587599	85649599	DB_Ctrl_dev_H3K27me3_P39_vs_E14_down_1704|9.81|10.4|-0.59	0	.
chr8	13971599	13974799	DB_Ctrl_dev_H3K27me3_P39_vs_E14_down_1705|-0.01|5.79|-5.81	0	.
chr1	152395999	152404599	DB_Ctrl_dev_H3K27me3_P39_vs_E14_down_1706|3.89|6.3|-2.41	0	.
chr7	139162799	139171399	DB_Ctrl_dev_H3K27me3_P39_vs_E14_down_1708|-0.01|5.8|-5.82	0	.
chr16	55817999	55823799	DB_Ctrl_dev_H3K27me3_P39_vs_E14_down_1709|-0.01|5.8|-5.81	0	.
chr10	77415399	77418399	DB_Ctrl_dev_H3K27me3_P39_vs_E14_down_1710|-0.01|5.8|-5.81	0	.
chr19	58939399	58950399	DB_Ctrl_dev_H3K27me3_P39_vs_E14_down_1711|4.41|6.52|-2.11	0	.
chr6	88980999	88992599	DB_Ctrl_dev_H3K27me3_P39_vs_E14_down_1712|4.54|6.59|-2.05	0	.
chr8	27119199	27122799	DB_Ctrl_dev_H3K27me3_P39_vs_E14_down_1715|3.44|6.06|-2.61	0	.
chr7	139095999	139106599	DB_Ctrl_dev_H3K27me3_P39_vs_E14_down_1716|-0.01|5.8|-5.82	0	.
chr15	78408399	78415199	DB_Ctrl_dev_H3K27me3_P39_vs_E14_down_1718|3.98|6.29|-2.31	0	.
chr11	101242599	101249399	DB_Ctrl_dev_H3K27me3_P39_vs_E14_down_1721|5.54|7.11|-1.57	0	.
chr5	140732399	140738599	DB_Ctrl_dev_H3K27me3_P39_vs_E14_down_1722|4.68|6.69|-2	0	.
chr18	10319399	10330399	DB_Ctrl_dev_H3K27me3_P39_vs_E14_down_1723|5.43|7.06|-1.64	0	.
chr19	41829999	41835399	DB_Ctrl_dev_H3K27me3_P39_vs_E14_down_1724|2.58|5.82|-3.24	0	.
chr9	74841799	74875599	DB_Ctrl_dev_H3K27me3_P39_vs_E14_down_1725|9.29|10.05|-0.76	0	.
chr8	121110799	121134399	DB_Ctrl_dev_H3K27me3_P39_vs_E14_down_1726|9.03|9.73|-0.69	0	.
chr5	114600199	114611999	DB_Ctrl_dev_H3K27me3_P39_vs_E14_down_1727|4.2|6.4|-2.21	0	.
chr10	62720399	62729399	DB_Ctrl_dev_H3K27me3_P39_vs_E14_down_1728|3.51|6.09|-2.58	0	.
chr2	18993199	19001799	DB_Ctrl_dev_H3K27me3_P39_vs_E14_down_1730|-0.01|5.77|-5.79	0	.
chr10	42272799	42276199	DB_Ctrl_dev_H3K27me3_P39_vs_E14_down_1731|1.58|5.64|-4.06	0	.
chr7	36067799	36082199	DB_Ctrl_dev_H3K27me3_P39_vs_E14_down_1732|5.74|7.24|-1.5	0	.
chr8	91610199	91616399	DB_Ctrl_dev_H3K27me3_P39_vs_E14_down_1733|-0.01|5.8|-5.82	0	.
chr11	70222999	70231399	DB_Ctrl_dev_H3K27me3_P39_vs_E14_down_1734|5.1|6.86|-1.76	0	.
chr8	123221999	123229399	DB_Ctrl_dev_H3K27me3_P39_vs_E14_down_1735|1.58|5.62|-4.04	0	.
chr13	111490599	111499599	DB_Ctrl_dev_H3K27me3_P39_vs_E14_down_1737|6.39|7.63|-1.24	0	.
chr7	97323799	97329399	DB_Ctrl_dev_H3K27me3_P39_vs_E14_down_1738|-0.01|5.77|-5.78	0	.
chr7	19362599	19371399	DB_Ctrl_dev_H3K27me3_P39_vs_E14_down_1741|2.98|5.93|-2.94	0	.
chr17	48093599	48100799	DB_Ctrl_dev_H3K27me3_P39_vs_E14_down_1742|6.97|8.11|-1.14	0	.
chr19	5753799	5759599	DB_Ctrl_dev_H3K27me3_P39_vs_E14_down_1743|-0.01|5.84|-5.85	0	.
chr4	124384199	124399399	DB_Ctrl_dev_H3K27me3_P39_vs_E14_down_1744|5.48|7.13|-1.65	0	.
chr7	28622399	28633999	DB_Ctrl_dev_H3K27me3_P39_vs_E14_down_1745|5.82|7.35|-1.52	0	.
chr1	167284999	167290599	DB_Ctrl_dev_H3K27me3_P39_vs_E14_down_1746|-0.01|5.77|-5.78	0	.
chr14	69808999	69817599	DB_Ctrl_dev_H3K27me3_P39_vs_E14_down_1747|2.56|5.91|-3.35	0	.
chr4	119732199	119736999	DB_Ctrl_dev_H3K27me3_P39_vs_E14_down_1748|3.07|5.93|-2.86	0	.
chr5	115590599	115599199	DB_Ctrl_dev_H3K27me3_P39_vs_E14_down_1749|2.14|5.74|-3.6	0	.
chr15	73747599	73753599	DB_Ctrl_dev_H3K27me3_P39_vs_E14_down_1750|-0.01|5.76|-5.77	0	.
chr1	74921399	74970399	DB_Ctrl_dev_H3K27me3_P39_vs_E14_down_1752|8.77|9.5|-0.72	0	.
chr18	37761399	37769199	DB_Ctrl_dev_H3K27me3_P39_vs_E14_down_1754|3.15|5.96|-2.8	0	.
chr4	149679399	149686399	DB_Ctrl_dev_H3K27me3_P39_vs_E14_down_1755|3.94|6.27|-2.33	0	.
chr16	28841799	28848199	DB_Ctrl_dev_H3K27me3_P39_vs_E14_down_1757|1.98|5.66|-3.68	0	.
chr15	89138199	89142999	DB_Ctrl_dev_H3K27me3_P39_vs_E14_down_1758|3.45|6.15|-2.7	0	.
chr4	102974199	102983599	DB_Ctrl_dev_H3K27me3_P39_vs_E14_down_1759|4.69|6.62|-1.93	0	.
chr19	37427799	37443199	DB_Ctrl_dev_H3K27me3_P39_vs_E14_down_1760|7.73|8.59|-0.86	0	.
chr17	55949999	55955799	DB_Ctrl_dev_H3K27me3_P39_vs_E14_down_1762|2.31|5.69|-3.38	0	.
chr19	53140199	53145599	DB_Ctrl_dev_H3K27me3_P39_vs_E14_down_1764|-0.01|5.75|-5.77	0	.
chr16	17560199	17565999	DB_Ctrl_dev_H3K27me3_P39_vs_E14_down_1765|1.78|5.66|-3.87	0	.
chr13	94678599	94722399	DB_Ctrl_dev_H3K27me3_P39_vs_E14_down_1767|8.96|9.64|-0.68	0	.
chr4	114404399	114412999	DB_Ctrl_dev_H3K27me3_P39_vs_E14_down_1768|4.66|6.64|-1.98	0	.
chr16	15883999	15890799	DB_Ctrl_dev_H3K27me3_P39_vs_E14_down_1769|5.09|6.86|-1.77	0	.
chr15	7802999	7825199	DB_Ctrl_dev_H3K27me3_P39_vs_E14_down_1771|8.16|8.98|-0.82	0	.
chr11	95255599	95261399	DB_Ctrl_dev_H3K27me3_P39_vs_E14_down_1772|-0.01|5.75|-5.77	0	.
chr2	32575799	32582599	DB_Ctrl_dev_H3K27me3_P39_vs_E14_down_1773|2.68|5.88|-3.2	0	.
chr6	88970799	88980199	DB_Ctrl_dev_H3K27me3_P39_vs_E14_down_1774|4.94|6.8|-1.86	0	.
chr8	84596999	84604599	DB_Ctrl_dev_H3K27me3_P39_vs_E14_down_1775|2.14|5.74|-3.59	0	.
chr4	134079799	134082999	DB_Ctrl_dev_H3K27me3_P39_vs_E14_down_1776|-0.01|5.74|-5.76	0	.
chr10	79734799	79741399	DB_Ctrl_dev_H3K27me3_P39_vs_E14_down_1777|-0.01|5.81|-5.82	0	.
chr11	120606199	120614399	DB_Ctrl_dev_H3K27me3_P39_vs_E14_down_1778|-0.01|5.79|-5.8	0	.
chr7	57382799	57390799	DB_Ctrl_dev_H3K27me3_P39_vs_E14_down_1779|-0.01|5.74|-5.75	0	.
chr15	76177599	76184399	DB_Ctrl_dev_H3K27me3_P39_vs_E14_down_1780|-0.01|5.76|-5.77	0	.
chr5	115231399	115238799	DB_Ctrl_dev_H3K27me3_P39_vs_E14_down_1783|2.56|5.89|-3.34	0	.
chr4	149673599	149676999	DB_Ctrl_dev_H3K27me3_P39_vs_E14_down_1784|-0.01|5.74|-5.75	0	.
chr17	85666399	85696999	DB_Ctrl_dev_H3K27me3_P39_vs_E14_down_1786|9.09|9.77|-0.68	0	.
chr15	88888399	88892599	DB_Ctrl_dev_H3K27me3_P39_vs_E14_down_1788|-0.01|5.74|-5.75	0	.
chr14	105874399	105881199	DB_Ctrl_dev_H3K27me3_P39_vs_E14_down_1789|2.57|5.75|-3.18	0	.
chr16	10782399	10785599	DB_Ctrl_dev_H3K27me3_P39_vs_E14_down_1790|3.68|6.27|-2.59	0	.
chr2	119230999	119243399	DB_Ctrl_dev_H3K27me3_P39_vs_E14_down_1791|6.81|7.9|-1.1	0	.
chr1	64774599	64786399	DB_Ctrl_dev_H3K27me3_P39_vs_E14_down_1792|6.14|7.45|-1.32	0	.
chr11	120252599	120262199	DB_Ctrl_dev_H3K27me3_P39_vs_E14_down_1793|2.3|5.86|-3.56	0	.
chr14	68122399	68128599	DB_Ctrl_dev_H3K27me3_P39_vs_E14_down_1795|-0.01|5.73|-5.74	0	.
chr4	130819999	130829199	DB_Ctrl_dev_H3K27me3_P39_vs_E14_down_1796|-0.01|5.73|-5.75	0	.
chr17	34137599	34144199	DB_Ctrl_dev_H3K27me3_P39_vs_E14_down_1797|5.08|6.9|-1.83	0	.
chr4	123338799	123345599	DB_Ctrl_dev_H3K27me3_P39_vs_E14_down_1799|6.18|7.48|-1.3	0	.
chrX	7920599	7923599	DB_Ctrl_dev_H3K27me3_P39_vs_E14_down_1801|-0.01|5.73|-5.74	0	.
chr19	45130399	45175399	DB_Ctrl_dev_H3K27me3_P39_vs_E14_down_1802|9.64|10.29|-0.66	0	.
chr6	29165999	29185799	DB_Ctrl_dev_H3K27me3_P39_vs_E14_down_1803|6.87|7.95|-1.08	0	.
chr5	92038199	92045799	DB_Ctrl_dev_H3K27me3_P39_vs_E14_down_1804|-0.01|5.72|-5.74	0	.
chr9	102173399	102181799	DB_Ctrl_dev_H3K27me3_P39_vs_E14_down_1806|2.17|5.75|-3.58	0	.
chr15	78015599	78020999	DB_Ctrl_dev_H3K27me3_P39_vs_E14_down_1808|1.3|5.53|-4.23	0	.
chr11	32529799	32535199	DB_Ctrl_dev_H3K27me3_P39_vs_E14_down_1809|3.3|6.01|-2.71	0	.
chr2	18030599	18035599	DB_Ctrl_dev_H3K27me3_P39_vs_E14_down_1810|2.31|5.73|-3.42	0	.
chr14	68446599	68455799	DB_Ctrl_dev_H3K27me3_P39_vs_E14_down_1811|-0.01|5.71|-5.73	0	.
chr4	138261999	138265199	DB_Ctrl_dev_H3K27me3_P39_vs_E14_down_1814|1.58|5.58|-4	0	.
chr7	109777999	109783799	DB_Ctrl_dev_H3K27me3_P39_vs_E14_down_1815|3.69|6.12|-2.43	0	.
chr7	121318999	121330799	DB_Ctrl_dev_H3K27me3_P39_vs_E14_down_1816|5.51|7.12|-1.61	0	.
chr11	69396599	69400999	DB_Ctrl_dev_H3K27me3_P39_vs_E14_down_1817|-0.01|5.71|-5.72	0	.
chr2	92458999	92462799	DB_Ctrl_dev_H3K27me3_P39_vs_E14_down_1818|-0.01|5.7|-5.72	0	.
chr1	89986799	89999799	DB_Ctrl_dev_H3K27me3_P39_vs_E14_down_1819|6.94|8.02|-1.08	0	.
chr12	110841599	110849599	DB_Ctrl_dev_H3K27me3_P39_vs_E14_down_1820|5.32|6.97|-1.65	0	.
chr13	24637399	24642399	DB_Ctrl_dev_H3K27me3_P39_vs_E14_down_1822|1.32|5.55|-4.23	0	.
chr8	86324999	86334999	DB_Ctrl_dev_H3K27me3_P39_vs_E14_down_1823|4.11|6.35|-2.24	0	.
chr11	75466799	75469999	DB_Ctrl_dev_H3K27me3_P39_vs_E14_down_1824|1.3|5.54|-4.24	0	.
chr15	74655799	74663399	DB_Ctrl_dev_H3K27me3_P39_vs_E14_down_1830|-0.01|5.7|-5.71	0	.
chr2	180844599	180850199	DB_Ctrl_dev_H3K27me3_P39_vs_E14_down_1831|-0.01|5.7|-5.71	0	.
chr4	46328399	46354199	DB_Ctrl_dev_H3K27me3_P39_vs_E14_down_1832|8.7|9.39|-0.69	0	.
chr16	92397199	92406999	DB_Ctrl_dev_H3K27me3_P39_vs_E14_down_1834|3.9|6.24|-2.34	0	.
chr5	139289599	139296799	DB_Ctrl_dev_H3K27me3_P39_vs_E14_down_1835|2.45|5.77|-3.32	0	.
chr15	81234199	81239999	DB_Ctrl_dev_H3K27me3_P39_vs_E14_down_1836|1.56|5.57|-4.01	0	.
chr18	35644799	35659399	DB_Ctrl_dev_H3K27me3_P39_vs_E14_down_1837|7.44|8.41|-0.97	0	.
chr1	93232799	93238799	DB_Ctrl_dev_H3K27me3_P39_vs_E14_down_1839|5.33|6.96|-1.63	0	.
chr17	45534599	45539999	DB_Ctrl_dev_H3K27me3_P39_vs_E14_down_1840|0.57|5.54|-4.97	0	.
chr5	34511999	34517799	DB_Ctrl_dev_H3K27me3_P39_vs_E14_down_1841|3.16|5.91|-2.75	0	.
chr13	37448799	37453399	DB_Ctrl_dev_H3K27me3_P39_vs_E14_down_1842|0.98|5.52|-4.54	0	.
chr14	68077199	68086799	DB_Ctrl_dev_H3K27me3_P39_vs_E14_down_1843|5.64|7.14|-1.49	0	.
chr4	127212399	127216599	DB_Ctrl_dev_H3K27me3_P39_vs_E14_down_1844|-0.01|5.69|-5.71	0	.
chr8	94775799	94784599	DB_Ctrl_dev_H3K27me3_P39_vs_E14_down_1845|-0.01|5.69|-5.71	0	.
chr5	125338599	125341599	DB_Ctrl_dev_H3K27me3_P39_vs_E14_down_1846|1.8|5.62|-3.81	0	.
chr13	52527199	52532199	DB_Ctrl_dev_H3K27me3_P39_vs_E14_down_1847|-0.01|5.7|-5.72	0	.
chr19	41734999	41740999	DB_Ctrl_dev_H3K27me3_P39_vs_E14_down_1849|3.37|6|-2.63	0	.
chr11	116276999	116286599	DB_Ctrl_dev_H3K27me3_P39_vs_E14_down_1850|6.92|8.01|-1.1	0	.
chr4	125569399	125606399	DB_Ctrl_dev_H3K27me3_P39_vs_E14_down_1851|7.76|8.6|-0.84	0	.
chr10	62682999	62692999	DB_Ctrl_dev_H3K27me3_P39_vs_E14_down_1852|2.3|5.84|-3.55	0	.
chr15	5241199	5250599	DB_Ctrl_dev_H3K27me3_P39_vs_E14_down_1853|6.19|7.48|-1.3	0	.
chrX	37113999	37118799	DB_Ctrl_dev_H3K27me3_P39_vs_E14_down_1854|2.16|5.65|-3.49	0	.
chr9	56700999	56708399	DB_Ctrl_dev_H3K27me3_P39_vs_E14_down_1856|-0.01|5.68|-5.69	0	.
chr11	77347399	77352199	DB_Ctrl_dev_H3K27me3_P39_vs_E14_down_1857|2.57|5.72|-3.15	0	.
chr4	126280599	126293399	DB_Ctrl_dev_H3K27me3_P39_vs_E14_down_1858|6.85|7.97|-1.13	0	.
chr6	88722599	88727999	DB_Ctrl_dev_H3K27me3_P39_vs_E14_down_1859|-0.01|5.68|-5.69	0	.
chr9	73099399	73108199	DB_Ctrl_dev_H3K27me3_P39_vs_E14_down_1861|6.15|7.47|-1.32	0	.
chr13	48654399	48683199	DB_Ctrl_dev_H3K27me3_P39_vs_E14_down_1862|8.99|9.74|-0.75	0	.
chr8	92147399	92160399	DB_Ctrl_dev_H3K27me3_P39_vs_E14_down_1863|6.49|7.69|-1.2	0	.
chr17	87529999	87538999	DB_Ctrl_dev_H3K27me3_P39_vs_E14_down_1864|2.89|5.82|-2.93	0	.
chr1	9794599	9800199	DB_Ctrl_dev_H3K27me3_P39_vs_E14_down_1866|0.57|5.55|-4.98	0	.
chr15	79491599	79496599	DB_Ctrl_dev_H3K27me3_P39_vs_E14_down_1867|-0.01|5.67|-5.68	0	.
chr13	53458199	53487799	DB_Ctrl_dev_H3K27me3_P39_vs_E14_down_1868|8.81|9.57|-0.76	0	.
chr7	16157999	16159999	DB_Ctrl_dev_H3K27me3_P39_vs_E14_down_1870|-0.01|5.67|-5.69	0	.
chrX	170002399	170006999	DB_Ctrl_dev_H3K27me3_P39_vs_E14_down_1871|-0.01|5.73|-5.75	0	.
chr18	67340199	67346399	DB_Ctrl_dev_H3K27me3_P39_vs_E14_down_1872|4.87|6.7|-1.83	0	.
chr2	164851599	164862999	DB_Ctrl_dev_H3K27me3_P39_vs_E14_down_1873|6.77|7.86|-1.1	0	.
chr5	108362999	108381199	DB_Ctrl_dev_H3K27me3_P39_vs_E14_down_1874|2.58|8.65|-6.06	0	.
chr5	144355199	144362799	DB_Ctrl_dev_H3K27me3_P39_vs_E14_down_1875|5.43|7|-1.57	0	.
chr7	109185199	109189399	DB_Ctrl_dev_H3K27me3_P39_vs_E14_down_1877|3.16|5.99|-2.82	0	.
chr2	82050599	82055599	DB_Ctrl_dev_H3K27me3_P39_vs_E14_down_1879|1.3|5.51|-4.21	0	.
chr2	165158599	165168199	DB_Ctrl_dev_H3K27me3_P39_vs_E14_down_1881|3.94|6.26|-2.32	0	.
chr7	45017999	45022999	DB_Ctrl_dev_H3K27me3_P39_vs_E14_down_1883|-0.01|5.66|-5.67	0	.
chr2	25621399	25630999	DB_Ctrl_dev_H3K27me3_P39_vs_E14_down_1884|3.94|6.22|-2.28	0	.
chr15	78007199	78014399	DB_Ctrl_dev_H3K27me3_P39_vs_E14_down_1885|-0.01|5.66|-5.68	0	.
chr1	86296799	86308599	DB_Ctrl_dev_H3K27me3_P39_vs_E14_down_1886|5.07|6.83|-1.76	0	.
chr18	51113999	51119799	DB_Ctrl_dev_H3K27me3_P39_vs_E14_down_1888|3.84|6.2|-2.36	0	.
chr19	41663799	41672399	DB_Ctrl_dev_H3K27me3_P39_vs_E14_down_1889|4.27|6.39|-2.12	0	.
chr4	138852199	138857999	DB_Ctrl_dev_H3K27me3_P39_vs_E14_down_1890|1.56|5.56|-4	0	.
chr7	19765399	19777599	DB_Ctrl_dev_H3K27me3_P39_vs_E14_down_1891|6.18|7.46|-1.28	0	.
chr1	136939999	136962399	DB_Ctrl_dev_H3K27me3_P39_vs_E14_down_1892|8.29|9.09|-0.8	0	.
chr4	130836999	130852399	DB_Ctrl_dev_H3K27me3_P39_vs_E14_down_1893|5.89|7.28|-1.39	0	.
chr7	126707399	126716599	DB_Ctrl_dev_H3K27me3_P39_vs_E14_down_1895|3.93|6.3|-2.37	0	.
chr15	103330999	103337999	DB_Ctrl_dev_H3K27me3_P39_vs_E14_down_1896|-0.01|5.66|-5.68	0	.
chr11	16255799	16261399	DB_Ctrl_dev_H3K27me3_P39_vs_E14_down_1897|4.27|6.4|-2.13	0	.
chr4	154066799	154073599	DB_Ctrl_dev_H3K27me3_P39_vs_E14_down_1898|5.36|6.99|-1.63	0	.
chr9	66066799	66072199	DB_Ctrl_dev_H3K27me3_P39_vs_E14_down_1899|2.8|5.78|-2.99	0	.
chr3	97822199	97825399	DB_Ctrl_dev_H3K27me3_P39_vs_E14_down_1900|-0.01|5.65|-5.67	0	.
chr19	44636199	44694799	DB_Ctrl_dev_H3K27me3_P39_vs_E14_down_1901|9.18|9.87|-0.68	0	.
chr17	90724599	90729599	DB_Ctrl_dev_H3K27me3_P39_vs_E14_down_1902|-0.01|5.66|-5.67	0	.
chr12	14147999	14151999	DB_Ctrl_dev_H3K27me3_P39_vs_E14_down_1903|2.98|5.89|-2.91	0	.
chr18	34882999	34889599	DB_Ctrl_dev_H3K27me3_P39_vs_E14_down_1904|-0.01|5.65|-5.67	0	.
chr8	122226199	122236199	DB_Ctrl_dev_H3K27me3_P39_vs_E14_down_1905|5.51|7.04|-1.53	0	.
chr7	139702199	139707199	DB_Ctrl_dev_H3K27me3_P39_vs_E14_down_1906|1.3|5.5|-4.2	0	.
chr11	84629399	84657399	DB_Ctrl_dev_H3K27me3_P39_vs_E14_down_1907|6.95|7.98|-1.04	0	.
chr2	118928999	118937199	DB_Ctrl_dev_H3K27me3_P39_vs_E14_down_1908|-0.01|5.66|-5.67	0	.
chr17	57060999	57065599	DB_Ctrl_dev_H3K27me3_P39_vs_E14_down_1909|4.74|6.73|-1.98	0	.
chr7	19175799	19180999	DB_Ctrl_dev_H3K27me3_P39_vs_E14_down_1910|-0.01|5.67|-5.68	0	.
chr4	59623999	59627999	DB_Ctrl_dev_H3K27me3_P39_vs_E14_down_1911|3.31|5.95|-2.64	0	.
chr11	76568599	76573599	DB_Ctrl_dev_H3K27me3_P39_vs_E14_down_1914|-0.01|5.65|-5.66	0	.
chr15	91570199	91573999	DB_Ctrl_dev_H3K27me3_P39_vs_E14_down_1915|2.14|5.68|-3.54	0	.
chr11	117964999	117969399	DB_Ctrl_dev_H3K27me3_P39_vs_E14_down_1916|-0.01|5.64|-5.66	0	.
chr2	167532999	167542799	DB_Ctrl_dev_H3K27me3_P39_vs_E14_down_1917|5.99|7.33|-1.35	0	.
chr19	7054399	7059999	DB_Ctrl_dev_H3K27me3_P39_vs_E14_down_1918|0.58|5.5|-4.93	0	.
chr16	5743599	5755799	DB_Ctrl_dev_H3K27me3_P39_vs_E14_down_1919|5.49|7.07|-1.58	0	.
chr9	52674399	52681999	DB_Ctrl_dev_H3K27me3_P39_vs_E14_down_1920|2.32|7.55|-5.24	0	.
chr8	91794799	91812999	DB_Ctrl_dev_H3K27me3_P39_vs_E14_down_1921|8.54|9.36|-0.81	0	.
chr1	133160199	133165799	DB_Ctrl_dev_H3K27me3_P39_vs_E14_down_1922|5.19|6.87|-1.68	0	.
chr10	42856199	42867999	DB_Ctrl_dev_H3K27me3_P39_vs_E14_down_1923|5.09|6.84|-1.75	0	.
chr19	57309999	57317799	DB_Ctrl_dev_H3K27me3_P39_vs_E14_down_1924|3.63|6.06|-2.43	0	.
chr7	134934999	134940399	DB_Ctrl_dev_H3K27me3_P39_vs_E14_down_1925|-0.01|5.63|-5.65	0	.
chr4	152337399	152341399	DB_Ctrl_dev_H3K27me3_P39_vs_E14_down_1926|-0.01|5.63|-5.65	0	.
chr11	3514999	3518399	DB_Ctrl_dev_H3K27me3_P39_vs_E14_down_1927|0.98|5.48|-4.5	0	.
chr5	35373999	35409199	DB_Ctrl_dev_H3K27me3_P39_vs_E14_down_1928|9.56|10.16|-0.59	0	.
chr7	34808199	34815599	DB_Ctrl_dev_H3K27me3_P39_vs_E14_down_1929|4.84|6.67|-1.82	0	.
chr8	47986799	47990799	DB_Ctrl_dev_H3K27me3_P39_vs_E14_down_1930|2.45|5.66|-3.22	0	.
chr15	78101399	78107199	DB_Ctrl_dev_H3K27me3_P39_vs_E14_down_1933|0.58|5.5|-4.92	0	.
chr13	34646399	34655199	DB_Ctrl_dev_H3K27me3_P39_vs_E14_down_1934|6.53|7.68|-1.15	0	.
chr2	38922399	38928599	DB_Ctrl_dev_H3K27me3_P39_vs_E14_down_1936|4.76|6.67|-1.91	0	.
chr12	84183399	84193799	DB_Ctrl_dev_H3K27me3_P39_vs_E14_down_1937|-0.01|5.63|-5.65	0	.
chr4	137720199	137725999	DB_Ctrl_dev_H3K27me3_P39_vs_E14_down_1938|2.3|5.73|-3.43	0	.
chr3	67030399	67035399	DB_Ctrl_dev_H3K27me3_P39_vs_E14_down_1941|-0.01|5.63|-5.64	0	.
chr4	155356799	155367999	DB_Ctrl_dev_H3K27me3_P39_vs_E14_down_1942|6.58|7.72|-1.15	0	.
chr11	80579599	80585399	DB_Ctrl_dev_H3K27me3_P39_vs_E14_down_1943|-0.01|5.63|-5.64	0	.
chr4	47205799	47216399	DB_Ctrl_dev_H3K27me3_P39_vs_E14_down_1945|6.08|7.39|-1.3	0	.
chr15	83723199	83725999	DB_Ctrl_dev_H3K27me3_P39_vs_E14_down_1946|1.32|5.49|-4.18	0	.
chr10	61606599	61617599	DB_Ctrl_dev_H3K27me3_P39_vs_E14_down_1947|4.38|6.43|-2.05	0	.
chr8	4243999	4250199	DB_Ctrl_dev_H3K27me3_P39_vs_E14_down_1948|0.58|5.49|-4.92	0	.
chr12	86075599	86081599	DB_Ctrl_dev_H3K27me3_P39_vs_E14_down_1949|0.57|5.49|-4.92	0	.
chr7	140042199	140054599	DB_Ctrl_dev_H3K27me3_P39_vs_E14_down_1950|6.84|7.9|-1.07	0	.
chr7	142081399	142084999	DB_Ctrl_dev_H3K27me3_P39_vs_E14_down_1951|-0.01|5.62|-5.64	0	.
chr7	25362999	25370799	DB_Ctrl_dev_H3K27me3_P39_vs_E14_down_1954|5.4|6.99|-1.59	0	.
chr12	51591599	51595799	DB_Ctrl_dev_H3K27me3_P39_vs_E14_down_1955|4.57|6.53|-1.96	0	.
chr7	142951999	142972399	DB_Ctrl_dev_H3K27me3_P39_vs_E14_down_1956|7.16|8.22|-1.06	0	.
chr14	34978599	34986599	DB_Ctrl_dev_H3K27me3_P39_vs_E14_down_1957|4.23|6.34|-2.1	0	.
chr7	131815399	131821799	DB_Ctrl_dev_H3K27me3_P39_vs_E14_down_1958|3.15|5.88|-2.72	0	.
chr1	192185999	192197399	DB_Ctrl_dev_H3K27me3_P39_vs_E14_down_1959|5.13|6.84|-1.71	0	.
chr1	78307399	78319799	DB_Ctrl_dev_H3K27me3_P39_vs_E14_down_1961|5.7|7.32|-1.61	0	.
chr4	126725799	126740799	DB_Ctrl_dev_H3K27me3_P39_vs_E14_down_1962|7.89|8.73|-0.84	0	.
chr14	63936399	63952399	DB_Ctrl_dev_H3K27me3_P39_vs_E14_down_1963|7.65|8.52|-0.87	0	.
chr9	20971599	20979399	DB_Ctrl_dev_H3K27me3_P39_vs_E14_down_1964|3.38|6|-2.62	0	.
chr3	31304999	31311799	DB_Ctrl_dev_H3K27me3_P39_vs_E14_down_1965|3.79|6.15|-2.36	0	.
chr18	40255599	40260599	DB_Ctrl_dev_H3K27me3_P39_vs_E14_down_1966|-0.01|5.62|-5.64	0	.
chr13	54966399	54973999	DB_Ctrl_dev_H3K27me3_P39_vs_E14_down_1967|-0.01|5.66|-5.67	0	.
chr1	50923399	50929599	DB_Ctrl_dev_H3K27me3_P39_vs_E14_down_1969|-0.01|5.62|-5.64	0	.
chr2	36085399	36114399	DB_Ctrl_dev_H3K27me3_P39_vs_E14_down_1970|9.17|9.85|-0.68	0	.
chr4	127176399	127180799	DB_Ctrl_dev_H3K27me3_P39_vs_E14_down_1971|-0.01|5.62|-5.63	0	.
chr5	115188999	115193799	DB_Ctrl_dev_H3K27me3_P39_vs_E14_down_1972|-0.01|5.63|-5.64	0	.
chr11	105965799	105973799	DB_Ctrl_dev_H3K27me3_P39_vs_E14_down_1973|5.45|6.99|-1.55	0	.
chr14	70017799	70024599	DB_Ctrl_dev_H3K27me3_P39_vs_E14_down_1977|-0.01|5.61|-5.62	0	.
chr4	153415599	153422999	DB_Ctrl_dev_H3K27me3_P39_vs_E14_down_1979|0.58|5.51|-4.94	0	.
chr3	94361999	94368799	DB_Ctrl_dev_H3K27me3_P39_vs_E14_down_1980|4.24|6.42|-2.18	0	.
chr3	54753199	54756799	DB_Ctrl_dev_H3K27me3_P39_vs_E14_down_1982|-0.01|5.6|-5.62	0	.
chr14	22426399	22456399	DB_Ctrl_dev_H3K27me3_P39_vs_E14_down_1984|7.09|8.09|-1	0	.
chr15	31411999	31419199	DB_Ctrl_dev_H3K27me3_P39_vs_E14_down_1985|-0.01|5.6|-5.61	0	.
chr16	35976199	35982799	DB_Ctrl_dev_H3K27me3_P39_vs_E14_down_1986|0.99|5.48|-4.49	0	.
chr2	119861599	119871199	DB_Ctrl_dev_H3K27me3_P39_vs_E14_down_1987|2.89|5.79|-2.91	0	.
chr2	35778799	35787799	DB_Ctrl_dev_H3K27me3_P39_vs_E14_down_1988|1.58|5.52|-3.94	0	.
chr12	99962999	99973999	DB_Ctrl_dev_H3K27me3_P39_vs_E14_down_1989|6.37|7.58|-1.21	0	.
chr5	135885199	135895599	DB_Ctrl_dev_H3K27me3_P39_vs_E14_down_1990|6.42|7.64|-1.22	0	.
chr13	97195599	97200199	DB_Ctrl_dev_H3K27me3_P39_vs_E14_down_1991|2.44|5.69|-3.25	0	.
chr11	70613799	70619399	DB_Ctrl_dev_H3K27me3_P39_vs_E14_down_1992|-0.01|5.6|-5.61	0	.
chr11	118699799	118706199	DB_Ctrl_dev_H3K27me3_P39_vs_E14_down_1993|0.98|5.46|-4.48	0	.
chr17	83272399	83278199	DB_Ctrl_dev_H3K27me3_P39_vs_E14_down_1994|0.57|5.47|-4.9	0	.
chr7	19618199	19625599	DB_Ctrl_dev_H3K27me3_P39_vs_E14_down_1995|2.99|5.82|-2.83	0	.
chr17	34953399	34957399	DB_Ctrl_dev_H3K27me3_P39_vs_E14_down_1996|1.58|5.52|-3.94	0	.
chr19	6497799	6501799	DB_Ctrl_dev_H3K27me3_P39_vs_E14_down_1997|-0.01|5.59|-5.61	0	.
chr4	156247199	156253399	DB_Ctrl_dev_H3K27me3_P39_vs_E14_down_1998|-0.01|5.59|-5.61	0	.
chr7	131528399	131559999	DB_Ctrl_dev_H3K27me3_P39_vs_E14_down_2000|9.13|9.84|-0.71	0	.
chr1	60041799	60045599	DB_Ctrl_dev_H3K27me3_P39_vs_E14_down_2001|0.57|5.47|-4.9	0	.
chr9	122585799	122592599	DB_Ctrl_dev_H3K27me3_P39_vs_E14_down_2002|1.78|5.56|-3.78	0	.
chr12	57529799	57559799	DB_Ctrl_dev_H3K27me3_P39_vs_E14_down_2003|9.12|9.8|-0.68	0	.
chr8	70461199	70469199	DB_Ctrl_dev_H3K27me3_P39_vs_E14_down_2004|-0.01|5.59|-5.6	0	.
chr8	124377199	124384799	DB_Ctrl_dev_H3K27me3_P39_vs_E14_down_2005|-0.01|5.59|-5.61	0	.
chr12	111481399	111491199	DB_Ctrl_dev_H3K27me3_P39_vs_E14_down_2009|6.59|7.74|-1.15	0	.
chr3	96682999	96686999	DB_Ctrl_dev_H3K27me3_P39_vs_E14_down_2010|1.97|5.6|-3.63	0	.
chr2	180792399	180807799	DB_Ctrl_dev_H3K27me3_P39_vs_E14_down_2011|5.16|6.87|-1.71	0	.
chr14	16570799	16578399	DB_Ctrl_dev_H3K27me3_P39_vs_E14_down_2012|5.23|6.87|-1.63	0	.
chr9	29382399	29388199	DB_Ctrl_dev_H3K27me3_P39_vs_E14_down_2013|0.57|5.46|-4.89	0	.
chr1	88294399	88311799	DB_Ctrl_dev_H3K27me3_P39_vs_E14_down_2014|7.4|8.44|-1.05	0	.
chr11	97532199	97539599	DB_Ctrl_dev_H3K27me3_P39_vs_E14_down_2015|2.8|7.45|-4.65	0	.
chr11	74517599	74533199	DB_Ctrl_dev_H3K27me3_P39_vs_E14_down_2016|2.3|7.44|-5.14	0	.
chr11	75997799	76004999	DB_Ctrl_dev_H3K27me3_P39_vs_E14_down_2017|-0.01|5.58|-5.6	0	.
chr4	117295799	117307599	DB_Ctrl_dev_H3K27me3_P39_vs_E14_down_2018|6.72|7.82|-1.1	0	.
chr2	130693999	130703799	DB_Ctrl_dev_H3K27me3_P39_vs_E14_down_2019|4.85|6.67|-1.82	0	.
chr17	24744399	24759999	DB_Ctrl_dev_H3K27me3_P39_vs_E14_down_2021|6.94|7.96|-1.02	0	.
chr11	35272999	35280199	DB_Ctrl_dev_H3K27me3_P39_vs_E14_down_2022|3.07|5.84|-2.77	0	.
chr1	166306199	166310199	DB_Ctrl_dev_H3K27me3_P39_vs_E14_down_2023|2.14|5.67|-3.52	0	.
chr5	128538399	128555799	DB_Ctrl_dev_H3K27me3_P39_vs_E14_down_2024|6.11|7.4|-1.29	0	.
chr1	120580199	120633799	DB_Ctrl_dev_H3K27me3_P39_vs_E14_down_2025|9.85|10.5|-0.65	0	.
chr4	123200599	123203399	DB_Ctrl_dev_H3K27me3_P39_vs_E14_down_2026|2.8|5.75|-2.95	0	.
chr17	29187399	29194199	DB_Ctrl_dev_H3K27me3_P39_vs_E14_down_2027|3.69|6.07|-2.38	0	.
chr5	142926599	142929999	DB_Ctrl_dev_H3K27me3_P39_vs_E14_down_2029|1.98|5.56|-3.58	0	.
chr10	121291199	121296399	DB_Ctrl_dev_H3K27me3_P39_vs_E14_down_2031|0.58|5.46|-4.89	0	.
chr10	127256599	127264399	DB_Ctrl_dev_H3K27me3_P39_vs_E14_down_2032|-0.01|5.59|-5.6	0	.
chr11	61145999	61150799	DB_Ctrl_dev_H3K27me3_P39_vs_E14_down_2033|-0.01|5.58|-5.59	0	.
chr2	73260799	73282399	DB_Ctrl_dev_H3K27me3_P39_vs_E14_down_2034|8.92|9.6|-0.68	0	.
chr5	146965399	146986999	DB_Ctrl_dev_H3K27me3_P39_vs_E14_down_2036|5.83|7.23|-1.4	0	.
chr5	135816599	135824399	DB_Ctrl_dev_H3K27me3_P39_vs_E14_down_2037|-0.01|5.59|-5.6	0	.
chr8	95690799	95698199	DB_Ctrl_dev_H3K27me3_P39_vs_E14_down_2038|-0.01|5.56|-5.58	0	.
chr9	48821799	48826999	DB_Ctrl_dev_H3K27me3_P39_vs_E14_down_2039|2.99|5.83|-2.84	0	.
chr8	104024799	104031199	DB_Ctrl_dev_H3K27me3_P39_vs_E14_down_2040|-0.01|5.57|-5.58	0	.
chr6	101376399	101379599	DB_Ctrl_dev_H3K27me3_P39_vs_E14_down_2041|3.58|6.07|-2.5	0	.
chr10	79819599	79828999	DB_Ctrl_dev_H3K27me3_P39_vs_E14_down_2042|1.97|5.6|-3.62	0	.
chr9	20670399	20677999	DB_Ctrl_dev_H3K27me3_P39_vs_E14_down_2044|-0.01|5.56|-5.58	0	.
chr12	112872799	112882999	DB_Ctrl_dev_H3K27me3_P39_vs_E14_down_2045|6.95|8|-1.05	0	.
chr7	139523999	139535199	DB_Ctrl_dev_H3K27me3_P39_vs_E14_down_2046|4.96|6.74|-1.78	0	.
chr16	37383199	37385999	DB_Ctrl_dev_H3K27me3_P39_vs_E14_down_2047|-0.01|5.57|-5.58	0	.
chr7	46370799	46380799	DB_Ctrl_dev_H3K27me3_P39_vs_E14_down_2049|6.67|7.78|-1.11	0	.
chr9	67757199	67761799	DB_Ctrl_dev_H3K27me3_P39_vs_E14_down_2051|3.45|5.98|-2.53	0	.
chr7	139155599	139161999	DB_Ctrl_dev_H3K27me3_P39_vs_E14_down_2052|0.98|5.43|-4.45	0	.
chr11	29823399	29827599	DB_Ctrl_dev_H3K27me3_P39_vs_E14_down_2053|-0.01|5.55|-5.57	0	.
chr3	89087999	89092599	DB_Ctrl_dev_H3K27me3_P39_vs_E14_down_2054|-0.01|5.55|-5.57	0	.
chr6	8775999	8780999	DB_Ctrl_dev_H3K27me3_P39_vs_E14_down_2055|-0.01|5.55|-5.57	0	.
chr10	127174399	127183599	DB_Ctrl_dev_H3K27me3_P39_vs_E14_down_2056|2.3|7.34|-5.04	0	.
chr1	43160799	43167799	DB_Ctrl_dev_H3K27me3_P39_vs_E14_down_2057|1.3|5.46|-4.16	0	.
chr12	35530999	35536199	DB_Ctrl_dev_H3K27me3_P39_vs_E14_down_2058|-0.01|5.55|-5.57	0	.
chr11	51381399	51386999	DB_Ctrl_dev_H3K27me3_P39_vs_E14_down_2060|0.57|5.43|-4.87	0	.
chr7	122753199	122761199	DB_Ctrl_dev_H3K27me3_P39_vs_E14_down_2061|-0.01|5.56|-5.58	0	.
chr4	137676799	137684399	DB_Ctrl_dev_H3K27me3_P39_vs_E14_down_2063|-0.01|5.55|-5.57	0	.
chr8	70723799	70735199	DB_Ctrl_dev_H3K27me3_P39_vs_E14_down_2064|5.94|7.29|-1.35	0	.
chr18	12859799	12864799	DB_Ctrl_dev_H3K27me3_P39_vs_E14_down_2065|0.98|5.43|-4.45	0	.
chr17	5650399	5660199	DB_Ctrl_dev_H3K27me3_P39_vs_E14_down_2066|2.97|5.99|-3.01	0	.
chr16	94072999	94108999	DB_Ctrl_dev_H3K27me3_P39_vs_E14_down_2068|9.43|10.06|-0.64	0	.
chr12	9559399	9588999	DB_Ctrl_dev_H3K27me3_P39_vs_E14_down_2069|8.69|9.35|-0.66	0	.
chr1	78132399	78222799	DB_Ctrl_dev_H3K27me3_P39_vs_E14_down_2070|10.58|11.14|-0.56	0	.
chr5	119790399	119850399	DB_Ctrl_dev_H3K27me3_P39_vs_E14_down_2072|10.09|10.66|-0.57	0	.
chr13	31605999	31635399	DB_Ctrl_dev_H3K27me3_P39_vs_E14_down_2073|9.19|9.84|-0.66	0	.
chr14	70173999	70181599	DB_Ctrl_dev_H3K27me3_P39_vs_E14_down_2074|6.26|7.54|-1.28	0	.
chr10	128523999	128532399	DB_Ctrl_dev_H3K27me3_P39_vs_E14_down_2075|5.03|6.74|-1.71	0	.
chr9	45935399	45940199	DB_Ctrl_dev_H3K27me3_P39_vs_E14_down_2077|2.56|5.71|-3.15	0	.
chr9	55535999	55551399	DB_Ctrl_dev_H3K27me3_P39_vs_E14_down_2078|8.3|9.03|-0.72	0	.
chr4	128959999	128965199	DB_Ctrl_dev_H3K27me3_P39_vs_E14_down_2079|0.58|5.42|-4.85	0	.
chr17	70702199	70710599	DB_Ctrl_dev_H3K27me3_P39_vs_E14_down_2080|-0.01|5.55|-5.56	0	.
chr1	75270399	75286199	DB_Ctrl_dev_H3K27me3_P39_vs_E14_down_2082|3.95|7.56|-3.61	0	.
chr5	136144199	136149599	DB_Ctrl_dev_H3K27me3_P39_vs_E14_down_2083|1.79|5.5|-3.71	0	.
chr5	142548799	142552399	DB_Ctrl_dev_H3K27me3_P39_vs_E14_down_2084|-0.01|5.54|-5.55	0	.
chr10	19930199	19935799	DB_Ctrl_dev_H3K27me3_P39_vs_E14_down_2085|2.99|5.79|-2.8	0	.
chr5	57718599	57722199	DB_Ctrl_dev_H3K27me3_P39_vs_E14_down_2086|1.3|5.44|-4.14	0	.
chr16	34094399	34098599	DB_Ctrl_dev_H3K27me3_P39_vs_E14_down_2087|2.32|5.69|-3.37	0	.
chr10	64087799	64091999	DB_Ctrl_dev_H3K27me3_P39_vs_E14_down_2088|2|5.58|-3.58	0	.
chr2	32360199	32362799	DB_Ctrl_dev_H3K27me3_P39_vs_E14_down_2090|1.32|5.44|-4.12	0	.
chr11	116650999	116655199	DB_Ctrl_dev_H3K27me3_P39_vs_E14_down_2091|-0.01|5.54|-5.55	0	.
chr11	50844799	50858199	DB_Ctrl_dev_H3K27me3_P39_vs_E14_down_2092|7.04|8.04|-0.99	0	.
chr3	144162599	144172999	DB_Ctrl_dev_H3K27me3_P39_vs_E14_down_2093|5.13|6.8|-1.66	0	.
chr2	28203199	28207199	DB_Ctrl_dev_H3K27me3_P39_vs_E14_down_2095|-0.01|5.55|-5.56	0	.
chr5	119082999	119088999	DB_Ctrl_dev_H3K27me3_P39_vs_E14_down_2096|5.16|6.8|-1.65	0	.
chr9	99860399	99882199	DB_Ctrl_dev_H3K27me3_P39_vs_E14_down_2097|8.69|9.35|-0.66	0	.
chr3	66723399	66755599	DB_Ctrl_dev_H3K27me3_P39_vs_E14_down_2098|8.13|8.9|-0.77	0	.
chr9	44070799	44078799	DB_Ctrl_dev_H3K27me3_P39_vs_E14_down_2099|-0.01|5.53|-5.54	0	.
chr11	62578799	62585199	DB_Ctrl_dev_H3K27me3_P39_vs_E14_down_2100|-0.01|5.53|-5.55	0	.
chr2	153021599	153030399	DB_Ctrl_dev_H3K27me3_P39_vs_E14_down_2101|3.68|6.06|-2.38	0	.
chr8	33925599	33932399	DB_Ctrl_dev_H3K27me3_P39_vs_E14_down_2102|6.54|7.66|-1.12	0	.
chr11	68858599	68863999	DB_Ctrl_dev_H3K27me3_P39_vs_E14_down_2103|0.98|5.41|-4.44	0	.
chr7	139911799	139922999	DB_Ctrl_dev_H3K27me3_P39_vs_E14_down_2104|5.51|7.02|-1.5	0	.
chr11	103658199	103663999	DB_Ctrl_dev_H3K27me3_P39_vs_E14_down_2105|0.57|5.45|-4.88	0	.
chr8	84034599	84056999	DB_Ctrl_dev_H3K27me3_P39_vs_E14_down_2107|7.22|8.17|-0.96	0	.
chr11	97659999	97662999	DB_Ctrl_dev_H3K27me3_P39_vs_E14_down_2109|3.44|5.93|-2.49	0	.
chr11	43763199	43779599	DB_Ctrl_dev_H3K27me3_P39_vs_E14_down_2110|6.56|7.71|-1.15	0	.
chr7	120158599	120169999	DB_Ctrl_dev_H3K27me3_P39_vs_E14_down_2111|4.66|6.55|-1.89	0	.
chr1	87707799	87720399	DB_Ctrl_dev_H3K27me3_P39_vs_E14_down_2113|3.69|6.13|-2.44	0	.
chr13	98204599	98210999	DB_Ctrl_dev_H3K27me3_P39_vs_E14_down_2116|-0.01|5.52|-5.54	0	.
chr2	180452999	180458199	DB_Ctrl_dev_H3K27me3_P39_vs_E14_down_2117|1.98|5.53|-3.55	0	.
chr17	29174999	29179999	DB_Ctrl_dev_H3K27me3_P39_vs_E14_down_2118|0.57|5.41|-4.85	0	.
chr17	27651199	27657399	DB_Ctrl_dev_H3K27me3_P39_vs_E14_down_2119|-0.01|5.52|-5.54	0	.
chr2	103968399	103972999	DB_Ctrl_dev_H3K27me3_P39_vs_E14_down_2120|5.1|6.78|-1.68	0	.
chr9	40864999	40898599	DB_Ctrl_dev_H3K27me3_P39_vs_E14_down_2122|9.08|9.75|-0.67	0	.
chr15	80272199	80277399	DB_Ctrl_dev_H3K27me3_P39_vs_E14_down_2123|0.58|5.43|-4.86	0	.
chr8	116731999	116737399	DB_Ctrl_dev_H3K27me3_P39_vs_E14_down_2124|0.98|5.39|-4.41	0	.
chr9	37542799	37546799	DB_Ctrl_dev_H3K27me3_P39_vs_E14_down_2126|2.8|5.8|-3	0	.
chr7	144835199	144844399	DB_Ctrl_dev_H3K27me3_P39_vs_E14_down_2127|6.79|7.85|-1.06	0	.
chr7	139024799	139032999	DB_Ctrl_dev_H3K27me3_P39_vs_E14_down_2128|2.98|5.88|-2.9	0	.
chr9	48677399	48683799	DB_Ctrl_dev_H3K27me3_P39_vs_E14_down_2130|2.99|5.78|-2.79	0	.
chr18	36318599	36327399	DB_Ctrl_dev_H3K27me3_P39_vs_E14_down_2131|3.39|7.39|-4	0	.
chr15	76660199	76663999	DB_Ctrl_dev_H3K27me3_P39_vs_E14_down_2132|-0.01|5.51|-5.52	0	.
chr17	47333399	47340999	DB_Ctrl_dev_H3K27me3_P39_vs_E14_down_2133|-0.01|5.51|-5.52	0	.
chr5	143154399	143166399	DB_Ctrl_dev_H3K27me3_P39_vs_E14_down_2134|5.84|7.22|-1.38	0	.
chr11	59169399	59180999	DB_Ctrl_dev_H3K27me3_P39_vs_E14_down_2135|6.49|7.64|-1.15	0	.
chr4	46672999	46679399	DB_Ctrl_dev_H3K27me3_P39_vs_E14_down_2136|-0.01|5.51|-5.53	0	.
chr15	102099199	102110999	DB_Ctrl_dev_H3K27me3_P39_vs_E14_down_2137|5.24|6.85|-1.62	0	.
chr9	114976799	114980999	DB_Ctrl_dev_H3K27me3_P39_vs_E14_down_2138|-0.01|5.51|-5.52	0	.
chr4	154956399	154962599	DB_Ctrl_dev_H3K27me3_P39_vs_E14_down_2139|3.9|6.32|-2.42	0	.
chr4	55528199	55532199	DB_Ctrl_dev_H3K27me3_P39_vs_E14_down_2141|4.45|6.41|-1.97	0	.
chr19	50675599	50679999	DB_Ctrl_dev_H3K27me3_P39_vs_E14_down_2144|0.57|5.43|-4.86	0	.
chr19	4982599	5000199	DB_Ctrl_dev_H3K27me3_P39_vs_E14_down_2145|2.46|7.95|-5.49	0	.
chr7	30628399	30642599	DB_Ctrl_dev_H3K27me3_P39_vs_E14_down_2146|7.29|8.21|-0.92	0	.
chr7	45188199	45194599	DB_Ctrl_dev_H3K27me3_P39_vs_E14_down_2147|3.51|5.95|-2.45	0	.
chr9	51276999	51280599	DB_Ctrl_dev_H3K27me3_P39_vs_E14_down_2148|3.45|5.94|-2.5	0	.
chr14	7999599	8003999	DB_Ctrl_dev_H3K27me3_P39_vs_E14_down_2149|-0.01|5.51|-5.52	0	.
chr17	28355599	28366399	DB_Ctrl_dev_H3K27me3_P39_vs_E14_down_2150|7.23|8.16|-0.93	0	.
chr9	68654599	68657599	DB_Ctrl_dev_H3K27me3_P39_vs_E14_down_2152|1.57|5.46|-3.9	0	.
chr7	90301199	90305199	DB_Ctrl_dev_H3K27me3_P39_vs_E14_down_2153|3.58|6.02|-2.44	0	.
chr19	55566599	55573599	DB_Ctrl_dev_H3K27me3_P39_vs_E14_down_2154|-0.01|5.5|-5.51	0	.
chr4	153424999	153430399	DB_Ctrl_dev_H3K27me3_P39_vs_E14_down_2155|-0.01|5.5|-5.51	0	.
chr15	103079199	103105799	DB_Ctrl_dev_H3K27me3_P39_vs_E14_down_2156|7.86|8.77|-0.91	0	.
chr18	66288599	66294199	DB_Ctrl_dev_H3K27me3_P39_vs_E14_down_2157|5.32|6.93|-1.61	0	.
chr10	80010599	80023799	DB_Ctrl_dev_H3K27me3_P39_vs_E14_down_2158|6.31|7.53|-1.22	0	.
chr10	61974599	61984399	DB_Ctrl_dev_H3K27me3_P39_vs_E14_down_2159|6.87|7.9|-1.02	0	.
chr8	106130399	106140599	DB_Ctrl_dev_H3K27me3_P39_vs_E14_down_2160|6.85|7.93|-1.08	0	.
chr5	35075999	35080199	DB_Ctrl_dev_H3K27me3_P39_vs_E14_down_2162|-0.01|5.5|-5.51	0	.
chr6	29431199	29437799	DB_Ctrl_dev_H3K27me3_P39_vs_E14_down_2163|5.66|7.12|-1.46	0	.
chr11	70538199	70542999	DB_Ctrl_dev_H3K27me3_P39_vs_E14_down_2166|4.02|6.25|-2.23	0	.
chr19	21470599	21474199	DB_Ctrl_dev_H3K27me3_P39_vs_E14_down_2167|3.07|5.86|-2.8	0	.
chr2	152140599	152148999	DB_Ctrl_dev_H3K27me3_P39_vs_E14_down_2168|5.75|7.15|-1.4	0	.
chr17	79707399	79721399	DB_Ctrl_dev_H3K27me3_P39_vs_E14_down_2169|7.03|8.02|-0.99	0	.
chr1	181349599	181354799	DB_Ctrl_dev_H3K27me3_P39_vs_E14_down_2170|-0.01|5.49|-5.51	0	.
chr14	118920999	118924599	DB_Ctrl_dev_H3K27me3_P39_vs_E14_down_2171|1.99|5.56|-3.57	0	.
chr15	94402799	94406599	DB_Ctrl_dev_H3K27me3_P39_vs_E14_down_2172|-0.01|5.49|-5.5	0	.
chr7	120843799	120847599	DB_Ctrl_dev_H3K27me3_P39_vs_E14_down_2173|-0.01|5.49|-5.5	0	.
chr5	112318599	112324999	DB_Ctrl_dev_H3K27me3_P39_vs_E14_down_2174|-0.01|5.49|-5.51	0	.
chr4	140106799	140113799	DB_Ctrl_dev_H3K27me3_P39_vs_E14_down_2175|3.79|6.1|-2.3	0	.
chr4	138995399	139002599	DB_Ctrl_dev_H3K27me3_P39_vs_E14_down_2176|1.56|5.52|-3.96	0	.
chr5	148023799	148031399	DB_Ctrl_dev_H3K27me3_P39_vs_E14_down_2177|1.32|5.41|-4.09	0	.
chr14	70528399	70534199	DB_Ctrl_dev_H3K27me3_P39_vs_E14_down_2178|-0.01|5.49|-5.5	0	.
chr8	90345199	90351599	DB_Ctrl_dev_H3K27me3_P39_vs_E14_down_2179|3.98|6.23|-2.25	0	.
chr4	127236599	127241999	DB_Ctrl_dev_H3K27me3_P39_vs_E14_down_2180|-0.01|5.49|-5.5	0	.
chr12	34904999	34909199	DB_Ctrl_dev_H3K27me3_P39_vs_E14_down_2181|2.43|5.71|-3.28	0	.
chr17	29021199	29027399	DB_Ctrl_dev_H3K27me3_P39_vs_E14_down_2182|-0.01|5.48|-5.5	0	.
chr4	134453399	134456599	DB_Ctrl_dev_H3K27me3_P39_vs_E14_down_2183|0.99|5.37|-4.38	0	.
chr2	34911199	34916399	DB_Ctrl_dev_H3K27me3_P39_vs_E14_down_2184|4.71|6.55|-1.83	0	.
chr11	115822799	115833599	DB_Ctrl_dev_H3K27me3_P39_vs_E14_down_2186|5.93|7.26|-1.33	0	.
chr18	67286199	67293399	DB_Ctrl_dev_H3K27me3_P39_vs_E14_down_2188|2.58|5.78|-3.2	0	.
chr9	98948399	98978199	DB_Ctrl_dev_H3K27me3_P39_vs_E14_down_2189|9.14|9.84|-0.7	0	.
chr11	118537599	118545199	DB_Ctrl_dev_H3K27me3_P39_vs_E14_down_2190|-0.01|5.48|-5.5	0	.
chr18	38194199	38201399	DB_Ctrl_dev_H3K27me3_P39_vs_E14_down_2191|1.8|5.47|-3.67	0	.
chr5	129873199	129877799	DB_Ctrl_dev_H3K27me3_P39_vs_E14_down_2192|1.58|5.42|-3.84	0	.
chr19	3902599	3911999	DB_Ctrl_dev_H3K27me3_P39_vs_E14_down_2195|3.32|6.03|-2.72	0	.
chr1	10992799	10995799	DB_Ctrl_dev_H3K27me3_P39_vs_E14_down_2200|2.9|5.77|-2.87	0	.
chr4	138464399	138468799	DB_Ctrl_dev_H3K27me3_P39_vs_E14_down_2201|-0.01|5.47|-5.49	0	.
chr12	85287999	85291399	DB_Ctrl_dev_H3K27me3_P39_vs_E14_down_2202|2.57|5.63|-3.06	0	.
chr7	47088799	47096399	DB_Ctrl_dev_H3K27me3_P39_vs_E14_down_2203|1.97|5.56|-3.59	0	.
chr1	9846999	9851999	DB_Ctrl_dev_H3K27me3_P39_vs_E14_down_2205|3.51|5.93|-2.43	0	.
chr4	134332599	134348999	DB_Ctrl_dev_H3K27me3_P39_vs_E14_down_2207|6.99|7.99|-1	0	.
chr5	73645199	73656399	DB_Ctrl_dev_H3K27me3_P39_vs_E14_down_2209|6.53|7.73|-1.2	0	.
chrX	73634799	73641399	DB_Ctrl_dev_H3K27me3_P39_vs_E14_down_2210|5.09|6.74|-1.64	0	.
chr11	72485199	72490799	DB_Ctrl_dev_H3K27me3_P39_vs_E14_down_2211|-0.01|5.46|-5.48	0	.
chr4	41494199	41502999	DB_Ctrl_dev_H3K27me3_P39_vs_E14_down_2212|6.31|7.5|-1.19	0	.
chr4	129768399	129774999	DB_Ctrl_dev_H3K27me3_P39_vs_E14_down_2213|2.14|5.59|-3.44	0	.
chr13	59832999	59837599	DB_Ctrl_dev_H3K27me3_P39_vs_E14_down_2214|0.99|5.37|-4.38	0	.
chr3	8508199	8512799	DB_Ctrl_dev_H3K27me3_P39_vs_E14_down_2215|-0.01|5.48|-5.49	0	.
chr9	45109399	45117599	DB_Ctrl_dev_H3K27me3_P39_vs_E14_down_2216|3.31|5.86|-2.55	0	.
chr5	139378399	139383999	DB_Ctrl_dev_H3K27me3_P39_vs_E14_down_2217|2.46|5.7|-3.24	0	.
chr10	45483599	45500399	DB_Ctrl_dev_H3K27me3_P39_vs_E14_down_2218|6.45|7.62|-1.17	0	.
chr5	113536199	113542999	DB_Ctrl_dev_H3K27me3_P39_vs_E14_down_2219|3.08|5.87|-2.8	0	.
chr7	81984199	82004599	DB_Ctrl_dev_H3K27me3_P39_vs_E14_down_2221|7.63|8.46|-0.84	0	.
chr15	101221999	101225599	DB_Ctrl_dev_H3K27me3_P39_vs_E14_down_2223|-0.01|5.46|-5.47	0	.
chr19	58911799	58920599	DB_Ctrl_dev_H3K27me3_P39_vs_E14_down_2224|3.89|6.12|-2.23	0	.
chr11	103078599	103083799	DB_Ctrl_dev_H3K27me3_P39_vs_E14_down_2225|3.94|6.14|-2.2	0	.
chr11	72313399	72316799	DB_Ctrl_dev_H3K27me3_P39_vs_E14_down_2226|3.57|5.96|-2.39	0	.
chr8	84605399	84612999	DB_Ctrl_dev_H3K27me3_P39_vs_E14_down_2228|-0.01|5.46|-5.48	0	.
chr16	17206199	17213399	DB_Ctrl_dev_H3K27me3_P39_vs_E14_down_2230|1.8|5.49|-3.69	0	.
chr9	67629399	67634199	DB_Ctrl_dev_H3K27me3_P39_vs_E14_down_2232|2.9|5.76|-2.86	0	.
chr10	58812399	58814799	DB_Ctrl_dev_H3K27me3_P39_vs_E14_down_2233|0.58|5.37|-4.79	0	.
chr14	70202799	70209999	DB_Ctrl_dev_H3K27me3_P39_vs_E14_down_2234|5.8|7.25|-1.45	0	.
chr4	41723999	41734399	DB_Ctrl_dev_H3K27me3_P39_vs_E14_down_2236|6.13|7.37|-1.24	0	.
chr7	19094799	19101399	DB_Ctrl_dev_H3K27me3_P39_vs_E14_down_2237|-0.01|5.48|-5.5	0	.
chr2	104408999	104413199	DB_Ctrl_dev_H3K27me3_P39_vs_E14_down_2238|0.99|5.35|-4.36	0	.
chr13	91739399	91742399	DB_Ctrl_dev_H3K27me3_P39_vs_E14_down_2239|-0.01|5.46|-5.48	0	.
chr9	114589799	114598599	DB_Ctrl_dev_H3K27me3_P39_vs_E14_down_2240|-0.01|5.45|-5.47	0	.
chr11	76436599	76439799	DB_Ctrl_dev_H3K27me3_P39_vs_E14_down_2241|-0.01|5.45|-5.46	0	.
chr5	31125999	31144799	DB_Ctrl_dev_H3K27me3_P39_vs_E14_down_2243|7.19|8.15|-0.96	0	.
chr7	25141999	25146999	DB_Ctrl_dev_H3K27me3_P39_vs_E14_down_2244|2.17|5.6|-3.43	0	.
chr8	46149599	46154799	DB_Ctrl_dev_H3K27me3_P39_vs_E14_down_2245|1.97|5.53|-3.55	0	.
chr11	62745399	62749399	DB_Ctrl_dev_H3K27me3_P39_vs_E14_down_2247|1.8|5.48|-3.68	0	.
chr7	25067999	25073799	DB_Ctrl_dev_H3K27me3_P39_vs_E14_down_2249|1.3|5.36|-4.05	0	.
chr3	153276199	153280999	DB_Ctrl_dev_H3K27me3_P39_vs_E14_down_2250|2.15|5.5|-3.34	0	.
chr15	48789199	48792599	DB_Ctrl_dev_H3K27me3_P39_vs_E14_down_2252|-0.01|5.44|-5.46	0	.
chr4	115130999	115134999	DB_Ctrl_dev_H3K27me3_P39_vs_E14_down_2253|3.07|5.78|-2.71	0	.
chr5	128355199	128362799	DB_Ctrl_dev_H3K27me3_P39_vs_E14_down_2254|1.32|5.38|-4.07	0	.
chr5	112344199	112350599	DB_Ctrl_dev_H3K27me3_P39_vs_E14_down_2255|0.57|5.34|-4.78	0	.
chr10	75934599	75937399	DB_Ctrl_dev_H3K27me3_P39_vs_E14_down_2256|0.98|5.34|-4.36	0	.
chr7	111776599	111785999	DB_Ctrl_dev_H3K27me3_P39_vs_E14_down_2259|4.07|6.18|-2.11	0	.
chr2	34569399	34575999	DB_Ctrl_dev_H3K27me3_P39_vs_E14_down_2260|1.56|5.43|-3.87	0	.
chr17	36986599	36991599	DB_Ctrl_dev_H3K27me3_P39_vs_E14_down_2261|4.07|6.3|-2.24	0	.
chr2	27179399	27185999	DB_Ctrl_dev_H3K27me3_P39_vs_E14_down_2265|3.07|5.76|-2.69	0	.
chr10	76586399	76601199	DB_Ctrl_dev_H3K27me3_P39_vs_E14_down_2266|4.23|6.37|-2.15	0	.
chr6	54427399	54431799	DB_Ctrl_dev_H3K27me3_P39_vs_E14_down_2272|-0.01|5.44|-5.45	0	.
chr5	146670799	146687999	DB_Ctrl_dev_H3K27me3_P39_vs_E14_down_2273|5.78|7.2|-1.42	0	.
chr7	120934199	120942399	DB_Ctrl_dev_H3K27me3_P39_vs_E14_down_2274|1.58|5.42|-3.84	0	.
chr6	122832599	122838199	DB_Ctrl_dev_H3K27me3_P39_vs_E14_down_2275|-0.01|5.43|-5.45	0	.
chr8	84000599	84004799	DB_Ctrl_dev_H3K27me3_P39_vs_E14_down_2277|2.31|5.54|-3.23	0	.
chr12	87025399	87028599	DB_Ctrl_dev_H3K27me3_P39_vs_E14_down_2278|-0.01|5.46|-5.47	0	.
chr16	33826199	33839399	DB_Ctrl_dev_H3K27me3_P39_vs_E14_down_2279|7.2|8.12|-0.92	0	.
chr10	121428999	121435599	DB_Ctrl_dev_H3K27me3_P39_vs_E14_down_2281|1.56|5.41|-3.85	0	.
chr2	153100599	153114199	DB_Ctrl_dev_H3K27me3_P39_vs_E14_down_2284|6.77|7.8|-1.03	0	.
chr9	106223599	106232199	DB_Ctrl_dev_H3K27me3_P39_vs_E14_down_2285|3.79|6.05|-2.26	0	.
chr18	10702399	10708799	DB_Ctrl_dev_H3K27me3_P39_vs_E14_down_2286|3.56|6.08|-2.52	0	.
chr10	121637999	121644999	DB_Ctrl_dev_H3K27me3_P39_vs_E14_down_2290|5.44|7|-1.56	0	.
chr2	154406199	154409199	DB_Ctrl_dev_H3K27me3_P39_vs_E14_down_2291|2.45|5.59|-3.14	0	.
chr5	139525799	139609599	DB_Ctrl_dev_H3K27me3_P39_vs_E14_down_2295|10.17|10.72|-0.55	0	.
chr6	90808199	90814399	DB_Ctrl_dev_H3K27me3_P39_vs_E14_down_2296|-0.01|5.42|-5.44	0	.
chr12	112916599	112925199	DB_Ctrl_dev_H3K27me3_P39_vs_E14_down_2297|1.8|5.43|-3.64	0	.
chr19	26606999	26610799	DB_Ctrl_dev_H3K27me3_P39_vs_E14_down_2299|0.99|5.33|-4.33	0	.
chr17	33122999	33130399	DB_Ctrl_dev_H3K27me3_P39_vs_E14_down_2300|0.98|5.32|-4.35	0	.
chr5	125146799	125153599	DB_Ctrl_dev_H3K27me3_P39_vs_E14_down_2301|-0.01|5.45|-5.46	0	.
chr1	166251599	166258599	DB_Ctrl_dev_H3K27me3_P39_vs_E14_down_2302|-0.01|5.44|-5.45	0	.
chr7	109898199	109906199	DB_Ctrl_dev_H3K27me3_P39_vs_E14_down_2303|-0.01|5.41|-5.43	0	.
chr8	122727599	122732799	DB_Ctrl_dev_H3K27me3_P39_vs_E14_down_2304|-0.01|5.41|-5.43	0	.
chr11	95132999	95154599	DB_Ctrl_dev_H3K27me3_P39_vs_E14_down_2305|8.57|9.31|-0.73	0	.
chr11	98383199	98389199	DB_Ctrl_dev_H3K27me3_P39_vs_E14_down_2307|4.66|6.47|-1.82	0	.
chr17	3006799	3013199	DB_Ctrl_dev_H3K27me3_P39_vs_E14_down_2309|3.08|5.78|-2.71	0	.
chr17	26427199	26433599	DB_Ctrl_dev_H3K27me3_P39_vs_E14_down_2310|-0.01|5.41|-5.42	0	.
chr13	100613999	100617999	DB_Ctrl_dev_H3K27me3_P39_vs_E14_down_2311|4.07|6.18|-2.1	0	.
chr11	114846799	114854199	DB_Ctrl_dev_H3K27me3_P39_vs_E14_down_2312|5.9|7.21|-1.31	0	.
chr15	82947599	82953999	DB_Ctrl_dev_H3K27me3_P39_vs_E14_down_2314|-0.01|5.42|-5.43	0	.
chr5	74207399	74213399	DB_Ctrl_dev_H3K27me3_P39_vs_E14_down_2316|2.57|5.6|-3.02	0	.
chr12	84965599	84971999	DB_Ctrl_dev_H3K27me3_P39_vs_E14_down_2317|0.57|5.32|-4.75	0	.
chr7	143682599	143686399	DB_Ctrl_dev_H3K27me3_P39_vs_E14_down_2318|2.3|5.53|-3.23	0	.
chr10	63097599	63102799	DB_Ctrl_dev_H3K27me3_P39_vs_E14_down_2319|2.69|5.65|-2.96	0	.
chr11	118547199	118553999	DB_Ctrl_dev_H3K27me3_P39_vs_E14_down_2322|1.57|5.36|-3.79	0	.
chr16	7349399	7352999	DB_Ctrl_dev_H3K27me3_P39_vs_E14_down_2323|1.3|5.35|-4.04	0	.
chr7	13040599	13045999	DB_Ctrl_dev_H3K27me3_P39_vs_E14_down_2325|2.88|7.38|-4.5	0	.
chr5	24352599	24357599	DB_Ctrl_dev_H3K27me3_P39_vs_E14_down_2326|2.3|5.53|-3.22	0	.
chr11	35692199	35696999	DB_Ctrl_dev_H3K27me3_P39_vs_E14_down_2327|1.57|5.38|-3.81	0	.
chr19	23901599	23907399	DB_Ctrl_dev_H3K27me3_P39_vs_E14_down_2328|2.69|5.7|-3	0	.
chr3	117572799	117576799	DB_Ctrl_dev_H3K27me3_P39_vs_E14_down_2330|-0.01|5.4|-5.41	0	.
chr4	149584799	149588399	DB_Ctrl_dev_H3K27me3_P39_vs_E14_down_2331|-0.01|5.39|-5.41	0	.
chr5	113218399	113221799	DB_Ctrl_dev_H3K27me3_P39_vs_E14_down_2332|1.78|5.45|-3.67	0	.
chr15	78897799	78902199	DB_Ctrl_dev_H3K27me3_P39_vs_E14_down_2336|0.99|5.34|-4.35	0	.
chr13	93934199	93941599	DB_Ctrl_dev_H3K27me3_P39_vs_E14_down_2338|-0.01|5.39|-5.41	0	.
chr15	76205199	76210999	DB_Ctrl_dev_H3K27me3_P39_vs_E14_down_2339|-0.01|5.39|-5.41	0	.
chr17	28821599	28828799	DB_Ctrl_dev_H3K27me3_P39_vs_E14_down_2340|-0.01|5.41|-5.42	0	.
chr18	78044199	78051399	DB_Ctrl_dev_H3K27me3_P39_vs_E14_down_2341|5.94|7.25|-1.31	0	.
chr5	24425999	24434599	DB_Ctrl_dev_H3K27me3_P39_vs_E14_down_2342|3.51|5.96|-2.45	0	.
chr6	89377999	89382799	DB_Ctrl_dev_H3K27me3_P39_vs_E14_down_2347|-0.01|5.39|-5.4	0	.
chr8	111885599	111893599	DB_Ctrl_dev_H3K27me3_P39_vs_E14_down_2348|6.08|7.33|-1.25	0	.
chr11	80617999	80621399	DB_Ctrl_dev_H3K27me3_P39_vs_E14_down_2349|-0.01|5.39|-5.4	0	.
chr15	80394599	80401599	DB_Ctrl_dev_H3K27me3_P39_vs_E14_down_2350|-0.01|5.39|-5.4	0	.
chr17	46452799	46457999	DB_Ctrl_dev_H3K27me3_P39_vs_E14_down_2352|2.43|5.65|-3.22	0	.
chr17	5663599	5667999	DB_Ctrl_dev_H3K27me3_P39_vs_E14_down_2355|1.3|5.37|-4.08	0	.
chr10	99360399	99365399	DB_Ctrl_dev_H3K27me3_P39_vs_E14_down_2357|0.57|5.3|-4.73	0	.
chr2	26191399	26209799	DB_Ctrl_dev_H3K27me3_P39_vs_E14_down_2358|8.35|9.14|-0.79	0	.
chr5	139612399	139632999	DB_Ctrl_dev_H3K27me3_P39_vs_E14_down_2359|7.28|8.2|-0.91	0	.
chr17	28767399	28773999	DB_Ctrl_dev_H3K27me3_P39_vs_E14_down_2360|5.61|7.05|-1.44	0	.
chr2	174670799	174675799	DB_Ctrl_dev_H3K27me3_P39_vs_E14_down_2361|1.79|5.42|-3.63	0	.
chr16	93711999	93718599	DB_Ctrl_dev_H3K27me3_P39_vs_E14_down_2362|-0.01|5.38|-5.39	0	.
chr4	46837399	46842399	DB_Ctrl_dev_H3K27me3_P39_vs_E14_down_2364|-0.01|5.39|-5.4	0	.
chr15	99670599	99675999	DB_Ctrl_dev_H3K27me3_P39_vs_E14_down_2365|2.99|5.72|-2.73	0	.
chr7	29157199	29160799	DB_Ctrl_dev_H3K27me3_P39_vs_E14_down_2366|2.57|5.58|-3.02	0	.
chr12	98975599	98981999	DB_Ctrl_dev_H3K27me3_P39_vs_E14_down_2367|1.78|5.45|-3.66	0	.
chr6	120458799	120466199	DB_Ctrl_dev_H3K27me3_P39_vs_E14_down_2369|5.11|6.74|-1.62	0	.
chr14	66147799	66153599	DB_Ctrl_dev_H3K27me3_P39_vs_E14_down_2370|0.98|5.3|-4.32	0	.
chr8	84200199	84207199	DB_Ctrl_dev_H3K27me3_P39_vs_E14_down_2371|-0.01|5.38|-5.4	0	.
chr4	152349999	152353999	DB_Ctrl_dev_H3K27me3_P39_vs_E14_down_2372|-0.01|5.38|-5.39	0	.
chr13	74117399	74128599	DB_Ctrl_dev_H3K27me3_P39_vs_E14_down_2373|6.28|7.45|-1.17	0	.
chr11	53057399	53074599	DB_Ctrl_dev_H3K27me3_P39_vs_E14_down_2374|5.94|7.28|-1.34	0	.
chr14	70090199	70094399	DB_Ctrl_dev_H3K27me3_P39_vs_E14_down_2375|0.99|5.3|-4.3	0	.
chr18	62177199	62181799	DB_Ctrl_dev_H3K27me3_P39_vs_E14_down_2376|4.07|6.18|-2.11	0	.
chr2	148017399	148059599	DB_Ctrl_dev_H3K27me3_P39_vs_E14_down_2377|9.7|10.27|-0.57	0	.
chr14	102979199	102985799	DB_Ctrl_dev_H3K27me3_P39_vs_E14_down_2378|0.57|5.3|-4.73	0	.
chr3	87785599	87812799	DB_Ctrl_dev_H3K27me3_P39_vs_E14_down_2379|8.5|9.18|-0.67	0	.
chr11	101780399	101793199	DB_Ctrl_dev_H3K27me3_P39_vs_E14_down_2380|6|7.28|-1.28	0	.
chr3	129186999	129235799	DB_Ctrl_dev_H3K27me3_P39_vs_E14_down_2381|9.93|10.49|-0.56	0	.
chr12	112128399	112133399	DB_Ctrl_dev_H3K27me3_P39_vs_E14_down_2382|3.8|6.06|-2.26	0	.
chr4	140038599	140044199	DB_Ctrl_dev_H3K27me3_P39_vs_E14_down_2383|-0.01|5.37|-5.39	0	.
chr8	119861199	119868199	DB_Ctrl_dev_H3K27me3_P39_vs_E14_down_2384|-0.01|5.37|-5.39	0	.
chr17	56828799	56830999	DB_Ctrl_dev_H3K27me3_P39_vs_E14_down_2385|2.31|5.53|-3.22	0	.
chr14	54875199	54881999	DB_Ctrl_dev_H3K27me3_P39_vs_E14_down_2386|-0.01|5.37|-5.39	0	.
chr7	139553599	139562199	DB_Ctrl_dev_H3K27me3_P39_vs_E14_down_2388|3.56|6.01|-2.45	0	.
chr8	27259199	27264199	DB_Ctrl_dev_H3K27me3_P39_vs_E14_down_2389|1.97|5.48|-3.51	0	.
chr19	6827599	6857399	DB_Ctrl_dev_H3K27me3_P39_vs_E14_down_2393|6.61|8.88|-2.28	0	.
chr11	40454799	40472399	DB_Ctrl_dev_H3K27me3_P39_vs_E14_down_2394|6.59|7.68|-1.08	0	.
chr17	56897999	56905799	DB_Ctrl_dev_H3K27me3_P39_vs_E14_down_2397|-0.01|5.43|-5.44	0	.
chr15	67173999	67180199	DB_Ctrl_dev_H3K27me3_P39_vs_E14_down_2398|2.57|5.58|-3.01	0	.
[truncated: 4,221 more rows]

## Sheet: P0 < P39
chrom	start	end	name (id|log2_P39|log2_P0|log2_diff)	score	strand
chr5	51329599	51370199	DB_Ctrl_dev_H3K27me3_P39_vs_P0_up_3|6.65|1.35|5.3	0	.
chr4	95183599	95219999	DB_Ctrl_dev_H3K27me3_P39_vs_P0_up_9|6.28|1.84|4.44	0	.
chr11	76275399	76303199	DB_Ctrl_dev_H3K27me3_P39_vs_P0_up_29|5.94|2.47|3.46	0	.
chr3	106133599	106190999	DB_Ctrl_dev_H3K27me3_P39_vs_P0_up_38|6.13|-0.25|6.38	0	.
chr14	34116999	34143399	DB_Ctrl_dev_H3K27me3_P39_vs_P0_up_39|6.07|-0.25|6.32	0	.
chr14	34171799	34195799	DB_Ctrl_dev_H3K27me3_P39_vs_P0_up_40|6.06|-0.25|6.31	0	.
chr13	47379399	47400399	DB_Ctrl_dev_H3K27me3_P39_vs_P0_up_55|5.55|1.13|4.42	0	.
chr12	118553199	118581399	DB_Ctrl_dev_H3K27me3_P39_vs_P0_up_67|5.68|2.14|3.53	0	.
chr2	146051999	146078199	DB_Ctrl_dev_H3K27me3_P39_vs_P0_up_73|5.68|-0.25|5.93	0	.
chr11	101521999	101543999	DB_Ctrl_dev_H3K27me3_P39_vs_P0_up_74|5.68|2.52|3.17	0	.
chr17	72405399	72427799	DB_Ctrl_dev_H3K27me3_P39_vs_P0_up_75|5.68|-0.25|5.92	0	.
chr2	137590399	137616599	DB_Ctrl_dev_H3K27me3_P39_vs_P0_up_76|5.67|-0.25|5.92	0	.
chr5	127410799	127435399	DB_Ctrl_dev_H3K27me3_P39_vs_P0_up_81|5.73|2.2|3.52	0	.
chr10	85609199	85626999	DB_Ctrl_dev_H3K27me3_P39_vs_P0_up_93|5.33|0.88|4.45	0	.
chr6	97491999	97518199	DB_Ctrl_dev_H3K27me3_P39_vs_P0_up_103|5.78|2.93|2.84	0	.
chr10	85589399	85608399	DB_Ctrl_dev_H3K27me3_P39_vs_P0_up_104|5.32|0.24|5.07	0	.
chr10	120733199	120748399	DB_Ctrl_dev_H3K27me3_P39_vs_P0_up_110|5.4|1.96|3.44	0	.
chr5	37640599	37657599	DB_Ctrl_dev_H3K27me3_P39_vs_P0_up_114|5.35|-0.25|5.6	0	.
chr11	44914799	44934199	DB_Ctrl_dev_H3K27me3_P39_vs_P0_up_130|5.27|-0.25|5.52	0	.
chr16	43621799	43636399	DB_Ctrl_dev_H3K27me3_P39_vs_P0_up_136|5.24|1.51|3.74	0	.
chr7	115977799	116008399	DB_Ctrl_dev_H3K27me3_P39_vs_P0_up_142|6.1|4.02|2.08	0	.
chr1	167881999	167895999	DB_Ctrl_dev_H3K27me3_P39_vs_P0_up_144|5.31|1.69|3.62	0	.
chr2	118244599	118260599	DB_Ctrl_dev_H3K27me3_P39_vs_P0_up_145|5.15|1.14|4.01	0	.
chr4	64622999	64639199	DB_Ctrl_dev_H3K27me3_P39_vs_P0_up_173|5.08|-0.25|5.33	0	.
chr5	37658599	37670199	DB_Ctrl_dev_H3K27me3_P39_vs_P0_up_183|5.03|-0.25|5.28	0	.
chr5	19175199	19191599	DB_Ctrl_dev_H3K27me3_P39_vs_P0_up_193|5|-0.25|5.25	0	.
chr2	114002999	114024799	DB_Ctrl_dev_H3K27me3_P39_vs_P0_up_196|5.45|2.72|2.73	0	.
chr1	105473799	105488999	DB_Ctrl_dev_H3K27me3_P39_vs_P0_up_214|5.03|1.6|3.43	0	.
chr14	98880399	98897399	DB_Ctrl_dev_H3K27me3_P39_vs_P0_up_215|4.97|1.14|3.82	0	.
chr12	105307599	105327999	DB_Ctrl_dev_H3K27me3_P39_vs_P0_up_217|5.42|2.72|2.7	0	.
chr2	113987799	114002199	DB_Ctrl_dev_H3K27me3_P39_vs_P0_up_219|4.91|-0.25|5.15	0	.
chr6	49212799	49229199	DB_Ctrl_dev_H3K27me3_P39_vs_P0_up_220|6.11|4.18|1.93	0	.
chr4	100514999	100533199	DB_Ctrl_dev_H3K27me3_P39_vs_P0_up_222|5.14|1.69|3.44	0	.
chr4	109104999	109119399	DB_Ctrl_dev_H3K27me3_P39_vs_P0_up_226|4.9|-0.25|5.14	0	.
chr4	8952399	8968999	DB_Ctrl_dev_H3K27me3_P39_vs_P0_up_227|4.89|-0.25|5.14	0	.
chr9	58791999	58808399	DB_Ctrl_dev_H3K27me3_P39_vs_P0_up_229|5.26|1.97|3.29	0	.
chr4	45687999	45701399	DB_Ctrl_dev_H3K27me3_P39_vs_P0_up_231|4.83|0.42|4.41	0	.
chr9	89566399	89585799	DB_Ctrl_dev_H3K27me3_P39_vs_P0_up_233|4.87|-0.25|5.12	0	.
chr14	34080799	34094599	DB_Ctrl_dev_H3K27me3_P39_vs_P0_up_237|5|1.35|3.65	0	.
chr9	89661799	89677199	DB_Ctrl_dev_H3K27me3_P39_vs_P0_up_239|4.8|0.24|4.55	0	.
chr7	115635199	115655399	DB_Ctrl_dev_H3K27me3_P39_vs_P0_up_240|5.24|2.43|2.8	0	.
chr8	81389399	81407599	DB_Ctrl_dev_H3K27me3_P39_vs_P0_up_243|5.04|1.53|3.51	0	.
chr13	112282599	112295799	DB_Ctrl_dev_H3K27me3_P39_vs_P0_up_246|4.84|-0.25|5.09	0	.
chr6	97453599	97467399	DB_Ctrl_dev_H3K27me3_P39_vs_P0_up_250|4.83|0.88|3.95	0	.
chr14	34159599	34170799	DB_Ctrl_dev_H3K27me3_P39_vs_P0_up_252|5|1.67|3.33	0	.
chr3	31736199	31746999	DB_Ctrl_dev_H3K27me3_P39_vs_P0_up_256|4.84|1.13|3.72	0	.
chr6	48201199	48216999	DB_Ctrl_dev_H3K27me3_P39_vs_P0_up_258|4.81|-0.25|5.06	0	.
chr3	84769399	84783999	DB_Ctrl_dev_H3K27me3_P39_vs_P0_up_267|4.82|0.9|3.92	0	.
chr6	146300599	146315799	DB_Ctrl_dev_H3K27me3_P39_vs_P0_up_268|4.79|-0.25|5.04	0	.
chr14	34144199	34157799	DB_Ctrl_dev_H3K27me3_P39_vs_P0_up_275|5.24|2.51|2.73	0	.
chr8	89503599	89557199	DB_Ctrl_dev_H3K27me3_P39_vs_P0_up_283|7.05|5.36|1.69	0	.
chr1	184258999	184271599	DB_Ctrl_dev_H3K27me3_P39_vs_P0_up_286|4.73|-0.25|4.98	0	.
chr18	74571599	74583199	DB_Ctrl_dev_H3K27me3_P39_vs_P0_up_289|4.71|-0.25|4.96	0	.
chr2	137625399	137638799	DB_Ctrl_dev_H3K27me3_P39_vs_P0_up_291|4.96|1.53|3.43	0	.
chr17	73981599	73996599	DB_Ctrl_dev_H3K27me3_P39_vs_P0_up_297|4.7|0.61|4.09	0	.
chr11	33777999	33790599	DB_Ctrl_dev_H3K27me3_P39_vs_P0_up_300|4.7|-0.25|4.95	0	.
chr17	73688599	73700599	DB_Ctrl_dev_H3K27me3_P39_vs_P0_up_301|4.68|-0.25|4.93	0	.
chr7	115935199	115965799	DB_Ctrl_dev_H3K27me3_P39_vs_P0_up_302|6.01|4.23|1.78	0	.
chr4	45821799	45830399	DB_Ctrl_dev_H3K27me3_P39_vs_P0_up_304|4.68|-0.25|4.93	0	.
chr4	47322799	47340199	DB_Ctrl_dev_H3K27me3_P39_vs_P0_up_306|4.67|-0.25|4.92	0	.
chr3	31721799	31735199	DB_Ctrl_dev_H3K27me3_P39_vs_P0_up_307|4.68|-0.25|4.93	0	.
chr1	167900599	167913799	DB_Ctrl_dev_H3K27me3_P39_vs_P0_up_309|4.65|-0.25|4.9	0	.
chr9	77402799	77418399	DB_Ctrl_dev_H3K27me3_P39_vs_P0_up_315|4.64|-0.25|4.89	0	.
chr2	116704199	116718399	DB_Ctrl_dev_H3K27me3_P39_vs_P0_up_318|4.61|0.24|4.36	0	.
chr16	87827799	87840799	DB_Ctrl_dev_H3K27me3_P39_vs_P0_up_320|4.62|0.42|4.19	0	.
chr6	48893999	48910799	DB_Ctrl_dev_H3K27me3_P39_vs_P0_up_330|4.61|-0.25|4.86	0	.
chr9	117010999	117026199	DB_Ctrl_dev_H3K27me3_P39_vs_P0_up_331|4.71|0.9|3.81	0	.
chr6	97476799	97490599	DB_Ctrl_dev_H3K27me3_P39_vs_P0_up_337|4.63|-0.25|4.88	0	.
chr5	110937599	110949599	DB_Ctrl_dev_H3K27me3_P39_vs_P0_up_338|4.6|-0.25|4.84	0	.
chr6	140814399	140825999	DB_Ctrl_dev_H3K27me3_P39_vs_P0_up_345|4.56|0.24|4.32	0	.
chr1	129198399	129208399	DB_Ctrl_dev_H3K27me3_P39_vs_P0_up_347|4.58|-0.25|4.83	0	.
chr5	43509999	43522199	DB_Ctrl_dev_H3K27me3_P39_vs_P0_up_362|4.55|-0.25|4.8	0	.
chr10	92397199	92408999	DB_Ctrl_dev_H3K27me3_P39_vs_P0_up_363|4.55|-0.25|4.8	0	.
chr1	167780999	167796199	DB_Ctrl_dev_H3K27me3_P39_vs_P0_up_368|4.54|-0.25|4.79	0	.
chr13	72251399	72267599	DB_Ctrl_dev_H3K27me3_P39_vs_P0_up_371|5.14|2.25|2.88	0	.
chr1	167737399	167748999	DB_Ctrl_dev_H3K27me3_P39_vs_P0_up_372|4.72|1.34|3.38	0	.
chr8	89368799	89382799	DB_Ctrl_dev_H3K27me3_P39_vs_P0_up_373|4.53|-0.25|4.78	0	.
chr10	85541199	85562799	DB_Ctrl_dev_H3K27me3_P39_vs_P0_up_374|5.21|2.65|2.56	0	.
chr8	89449799	89466999	DB_Ctrl_dev_H3K27me3_P39_vs_P0_up_375|5.27|2.82|2.46	0	.
chr4	45710999	45722999	DB_Ctrl_dev_H3K27me3_P39_vs_P0_up_376|4.51|0.24|4.27	0	.
chr11	76326399	76344599	DB_Ctrl_dev_H3K27me3_P39_vs_P0_up_378|5.17|2.2|2.97	0	.
chr13	56682399	56697999	DB_Ctrl_dev_H3K27me3_P39_vs_P0_up_380|5.26|2.86|2.4	0	.
chr11	33606999	33621399	DB_Ctrl_dev_H3K27me3_P39_vs_P0_up_381|5.06|2.38|2.68	0	.
chr4	12606599	12618199	DB_Ctrl_dev_H3K27me3_P39_vs_P0_up_385|4.53|-0.25|4.77	0	.
chr6	97548199	97559199	DB_Ctrl_dev_H3K27me3_P39_vs_P0_up_387|4.49|-0.25|4.74	0	.
chr12	56975799	56990199	DB_Ctrl_dev_H3K27me3_P39_vs_P0_up_397|4.7|1.14|3.55	0	.
chr2	22166799	22181999	DB_Ctrl_dev_H3K27me3_P39_vs_P0_up_399|5.26|2.4|2.86	0	.
chr13	58501399	58513999	DB_Ctrl_dev_H3K27me3_P39_vs_P0_up_401|4.47|-0.25|4.72	0	.
chr1	190430599	190454999	DB_Ctrl_dev_H3K27me3_P39_vs_P0_up_402|5.72|3.83|1.89	0	.
chr15	55746599	55759999	DB_Ctrl_dev_H3K27me3_P39_vs_P0_up_403|4.48|0.42|4.05	0	.
chr10	120249599	120261399	DB_Ctrl_dev_H3K27me3_P39_vs_P0_up_405|4.46|-0.25|4.71	0	.
chr2	137662199	137675399	DB_Ctrl_dev_H3K27me3_P39_vs_P0_up_413|4.44|-0.25|4.69	0	.
chr15	8783199	8795799	DB_Ctrl_dev_H3K27me3_P39_vs_P0_up_415|4.43|-0.25|4.68	0	.
chr4	64577999	64597799	DB_Ctrl_dev_H3K27me3_P39_vs_P0_up_416|5.57|3.5|2.06	0	.
chr5	140345399	140364199	DB_Ctrl_dev_H3K27me3_P39_vs_P0_up_420|5.02|1.97|3.05	0	.
chr1	6730999	6741399	DB_Ctrl_dev_H3K27me3_P39_vs_P0_up_421|4.41|-0.25|4.66	0	.
chr13	12801199	12846999	DB_Ctrl_dev_H3K27me3_P39_vs_P0_up_422|6.46|5.02|1.44	0	.
chr18	52833399	52849599	DB_Ctrl_dev_H3K27me3_P39_vs_P0_up_423|4.65|1.23|3.42	0	.
chr13	56730799	56742799	DB_Ctrl_dev_H3K27me3_P39_vs_P0_up_424|4.42|-0.25|4.66	0	.
chr5	91901799	91912799	DB_Ctrl_dev_H3K27me3_P39_vs_P0_up_425|4.39|-0.25|4.64	0	.
chr2	118263599	118273999	DB_Ctrl_dev_H3K27me3_P39_vs_P0_up_426|4.39|-0.25|4.64	0	.
chr9	116971599	116981199	DB_Ctrl_dev_H3K27me3_P39_vs_P0_up_433|4.63|1.24|3.39	0	.
chr7	51760999	51775599	DB_Ctrl_dev_H3K27me3_P39_vs_P0_up_435|4.38|-0.25|4.63	0	.
chr11	72010599	72023399	DB_Ctrl_dev_H3K27me3_P39_vs_P0_up_436|4.42|0.42|4	0	.
chr9	77556999	77572599	DB_Ctrl_dev_H3K27me3_P39_vs_P0_up_437|5.05|2.09|2.96	0	.
chr4	135417399	135425599	DB_Ctrl_dev_H3K27me3_P39_vs_P0_up_438|4.38|-0.25|4.63	0	.
chr9	117165199	117183599	DB_Ctrl_dev_H3K27me3_P39_vs_P0_up_439|5.35|3.13|2.23	0	.
chr7	115889199	115911599	DB_Ctrl_dev_H3K27me3_P39_vs_P0_up_440|5.58|3.37|2.21	0	.
chr1	150818999	150834999	DB_Ctrl_dev_H3K27me3_P39_vs_P0_up_442|4.37|-0.25|4.62	0	.
chr6	100124599	100138399	DB_Ctrl_dev_H3K27me3_P39_vs_P0_up_443|4.41|0.42|3.98	0	.
chr9	116932799	116944799	DB_Ctrl_dev_H3K27me3_P39_vs_P0_up_444|4.37|-0.25|4.61	0	.
chr6	53620799	53632599	DB_Ctrl_dev_H3K27me3_P39_vs_P0_up_445|4.51|0.88|3.63	0	.
chr2	56544799	56558599	DB_Ctrl_dev_H3K27me3_P39_vs_P0_up_446|4.36|-0.25|4.61	0	.
chr13	112298999	112312399	DB_Ctrl_dev_H3K27me3_P39_vs_P0_up_447|4.36|-0.25|4.61	0	.
chr3	102236999	102254199	DB_Ctrl_dev_H3K27me3_P39_vs_P0_up_448|4.89|1.69|3.19	0	.
chr14	48836199	48856999	DB_Ctrl_dev_H3K27me3_P39_vs_P0_up_450|5.66|3.65|2.01	0	.
chr11	101492799	101509199	DB_Ctrl_dev_H3K27me3_P39_vs_P0_up_451|5.17|2.76|2.41	0	.
chr3	66405999	66419399	DB_Ctrl_dev_H3K27me3_P39_vs_P0_up_452|4.8|1.89|2.91	0	.
chr3	84731799	84745399	DB_Ctrl_dev_H3K27me3_P39_vs_P0_up_454|4.94|2.18|2.77	0	.
chr14	11436799	11446999	DB_Ctrl_dev_H3K27me3_P39_vs_P0_up_455|4.35|-0.25|4.6	0	.
chr4	124231199	124244399	DB_Ctrl_dev_H3K27me3_P39_vs_P0_up_460|4.64|1.14|3.49	0	.
chr16	25300999	25310599	DB_Ctrl_dev_H3K27me3_P39_vs_P0_up_462|4.34|-0.25|4.59	0	.
chr18	53492399	53502999	DB_Ctrl_dev_H3K27me3_P39_vs_P0_up_464|4.35|-0.25|4.6	0	.
chr16	87567599	87577399	DB_Ctrl_dev_H3K27me3_P39_vs_P0_up_466|4.34|-0.25|4.59	0	.
chr9	14702799	14712399	DB_Ctrl_dev_H3K27me3_P39_vs_P0_up_478|4.31|-0.25|4.56	0	.
chr3	106213999	106225199	DB_Ctrl_dev_H3K27me3_P39_vs_P0_up_481|4.32|-0.25|4.57	0	.
chr10	58209799	58220399	DB_Ctrl_dev_H3K27me3_P39_vs_P0_up_482|4.51|0.9|3.61	0	.
chr2	57692599	57699799	DB_Ctrl_dev_H3K27me3_P39_vs_P0_up_483|4.35|0.42|3.92	0	.
chr18	74535399	74545799	DB_Ctrl_dev_H3K27me3_P39_vs_P0_up_484|4.41|0.61|3.8	0	.
chr4	64598999	64612999	DB_Ctrl_dev_H3K27me3_P39_vs_P0_up_485|5.25|2.99|2.26	0	.
chr1	82638399	82654999	DB_Ctrl_dev_H3K27me3_P39_vs_P0_up_488|4.9|1.94|2.96	0	.
chr5	127496999	127509199	DB_Ctrl_dev_H3K27me3_P39_vs_P0_up_489|4.29|-0.25|4.54	0	.
chr2	174876399	174888999	DB_Ctrl_dev_H3K27me3_P39_vs_P0_up_490|4.3|-0.25|4.55	0	.
chr7	106257599	106276999	DB_Ctrl_dev_H3K27me3_P39_vs_P0_up_494|5.09|2.68|2.41	0	.
chr8	53193599	53203999	DB_Ctrl_dev_H3K27me3_P39_vs_P0_up_496|4.31|0.24|4.07	0	.
chr4	63271599	63289999	DB_Ctrl_dev_H3K27me3_P39_vs_P0_up_497|5.4|3.27|2.13	0	.
chr1	167752999	167766999	DB_Ctrl_dev_H3K27me3_P39_vs_P0_up_500|4.88|1.84|3.04	0	.
chr6	125557999	125569999	DB_Ctrl_dev_H3K27me3_P39_vs_P0_up_501|4.46|0.88|3.57	0	.
chr12	73401999	73411399	DB_Ctrl_dev_H3K27me3_P39_vs_P0_up_502|4.3|0.24|4.05	0	.
chr6	141184799	141197199	DB_Ctrl_dev_H3K27me3_P39_vs_P0_up_503|4.25|-0.25|4.5	0	.
chr2	170396399	170427399	DB_Ctrl_dev_H3K27me3_P39_vs_P0_up_504|5.69|3.87|1.82	0	.
chr13	112024799	112039799	DB_Ctrl_dev_H3K27me3_P39_vs_P0_up_511|5.06|2.6|2.46	0	.
chr1	102340799	102362399	DB_Ctrl_dev_H3K27me3_P39_vs_P0_up_512|5.47|3.27|2.19	0	.
chr8	127016199	127028399	DB_Ctrl_dev_H3K27me3_P39_vs_P0_up_518|4.36|0.61|3.75	0	.
chr6	53720999	53731599	DB_Ctrl_dev_H3K27me3_P39_vs_P0_up_520|4.29|0.42|3.87	0	.
chr1	190584599	190595399	DB_Ctrl_dev_H3K27me3_P39_vs_P0_up_522|4.23|-0.25|4.48	0	.
chr9	116841199	116853599	DB_Ctrl_dev_H3K27me3_P39_vs_P0_up_523|4.65|1.35|3.3	0	.
chr18	74583999	74591399	DB_Ctrl_dev_H3K27me3_P39_vs_P0_up_527|4.27|0.42|3.85	0	.
chr17	69468799	69477199	DB_Ctrl_dev_H3K27me3_P39_vs_P0_up_528|4.22|-0.25|4.47	0	.
chr2	135519999	135530199	DB_Ctrl_dev_H3K27me3_P39_vs_P0_up_529|4.22|-0.25|4.47	0	.
chr11	44877599	44913999	DB_Ctrl_dev_H3K27me3_P39_vs_P0_up_530|6.24|4.48|1.76	0	.
chr19	34584799	34599799	DB_Ctrl_dev_H3K27me3_P39_vs_P0_up_533|4.8|1.69|3.11	0	.
chr9	47019599	47033399	DB_Ctrl_dev_H3K27me3_P39_vs_P0_up_534|4.21|-0.25|4.46	0	.
chr3	83580999	83591399	DB_Ctrl_dev_H3K27me3_P39_vs_P0_up_535|4.21|-0.25|4.46	0	.
chr11	57707199	57719799	DB_Ctrl_dev_H3K27me3_P39_vs_P0_up_538|4.35|0.61|3.74	0	.
chr5	101425399	101435199	DB_Ctrl_dev_H3K27me3_P39_vs_P0_up_539|4.2|-0.25|4.45	0	.
chr11	44942599	44954199	DB_Ctrl_dev_H3K27me3_P39_vs_P0_up_540|4.19|-0.25|4.44	0	.
chr1	187762599	187774599	DB_Ctrl_dev_H3K27me3_P39_vs_P0_up_542|4.6|1.44|3.16	0	.
chr19	25570999	25579799	DB_Ctrl_dev_H3K27me3_P39_vs_P0_up_543|4.66|1.51|3.15	0	.
chr12	118582399	118590999	DB_Ctrl_dev_H3K27me3_P39_vs_P0_up_546|4.43|0.9|3.53	0	.
chr16	43601999	43612199	DB_Ctrl_dev_H3K27me3_P39_vs_P0_up_547|4.18|-0.25|4.43	0	.
chr6	146288199	146296399	DB_Ctrl_dev_H3K27me3_P39_vs_P0_up_549|4.18|-0.25|4.42	0	.
chr1	105509999	105517399	DB_Ctrl_dev_H3K27me3_P39_vs_P0_up_551|4.17|-0.25|4.42	0	.
chr9	89277799	89288399	DB_Ctrl_dev_H3K27me3_P39_vs_P0_up_554|4.15|-0.25|4.4	0	.
chr2	64387199	64396399	DB_Ctrl_dev_H3K27me3_P39_vs_P0_up_555|4.15|-0.25|4.4	0	.
chr9	74144199	74156999	DB_Ctrl_dev_H3K27me3_P39_vs_P0_up_557|4.15|-0.25|4.4	0	.
chr16	88354199	88362799	DB_Ctrl_dev_H3K27me3_P39_vs_P0_up_560|4.2|0.24|3.96	0	.
chr18	13822399	13840399	DB_Ctrl_dev_H3K27me3_P39_vs_P0_up_563|4.87|2.19|2.68	0	.
chr5	37460199	37469999	DB_Ctrl_dev_H3K27me3_P39_vs_P0_up_564|4.14|-0.25|4.39	0	.
chr6	130879599	130890199	DB_Ctrl_dev_H3K27me3_P39_vs_P0_up_565|4.17|0.24|3.93	0	.
chr9	49205999	49213399	DB_Ctrl_dev_H3K27me3_P39_vs_P0_up_566|4.14|-0.25|4.38	0	.
chr2	169738199	169747599	DB_Ctrl_dev_H3K27me3_P39_vs_P0_up_567|4.14|-0.25|4.38	0	.
chr6	56358599	56364399	DB_Ctrl_dev_H3K27me3_P39_vs_P0_up_571|4.13|-0.25|4.38	0	.
chr2	163381199	163396199	DB_Ctrl_dev_H3K27me3_P39_vs_P0_up_573|4.81|2.19|2.63	0	.
chr18	74596799	74605399	DB_Ctrl_dev_H3K27me3_P39_vs_P0_up_574|4.13|-0.25|4.38	0	.
chr16	23777199	23787799	DB_Ctrl_dev_H3K27me3_P39_vs_P0_up_575|4.34|0.88|3.46	0	.
chr11	33909599	33930199	DB_Ctrl_dev_H3K27me3_P39_vs_P0_up_577|5.54|3.49|2.05	0	.
chr15	88030399	88038799	DB_Ctrl_dev_H3K27me3_P39_vs_P0_up_581|4.18|0.42|3.76	0	.
chr7	115536999	115549399	DB_Ctrl_dev_H3K27me3_P39_vs_P0_up_582|4.11|-0.25|4.36	0	.
chr2	105075399	105084599	DB_Ctrl_dev_H3K27me3_P39_vs_P0_up_586|4.18|0.24|3.93	0	.
chr11	57605599	57616399	DB_Ctrl_dev_H3K27me3_P39_vs_P0_up_587|4.1|-0.25|4.35	0	.
chr4	84321399	84331799	DB_Ctrl_dev_H3K27me3_P39_vs_P0_up_588|4.1|-0.25|4.35	0	.
chr2	93615799	93624199	DB_Ctrl_dev_H3K27me3_P39_vs_P0_up_591|4.24|0.61|3.63	0	.
chr10	19810399	19820199	DB_Ctrl_dev_H3K27me3_P39_vs_P0_up_593|4.1|-0.25|4.35	0	.
chr1	150903199	150912199	DB_Ctrl_dev_H3K27me3_P39_vs_P0_up_594|4.09|-0.25|4.34	0	.
chr10	87224599	87232999	DB_Ctrl_dev_H3K27me3_P39_vs_P0_up_600|4.08|-0.25|4.33	0	.
chr10	96716399	96725599	DB_Ctrl_dev_H3K27me3_P39_vs_P0_up_601|4.08|-0.25|4.33	0	.
chr10	121092599	121100399	DB_Ctrl_dev_H3K27me3_P39_vs_P0_up_603|4.09|-0.25|4.33	0	.
chr10	39610599	39621599	DB_Ctrl_dev_H3K27me3_P39_vs_P0_up_605|4.09|-0.25|4.33	0	.
chr14	33812799	33821399	DB_Ctrl_dev_H3K27me3_P39_vs_P0_up_606|4.24|0.75|3.48	0	.
chr9	117574399	117586599	DB_Ctrl_dev_H3K27me3_P39_vs_P0_up_614|4.45|1.34|3.12	0	.
chr11	34517999	34532799	DB_Ctrl_dev_H3K27me3_P39_vs_P0_up_615|4.85|2.19|2.65	0	.
chr17	7803399	7814199	DB_Ctrl_dev_H3K27me3_P39_vs_P0_up_619|4.74|2.01|2.73	0	.
chr4	45582399	45592799	DB_Ctrl_dev_H3K27me3_P39_vs_P0_up_621|4.46|1.14|3.31	0	.
chr6	137104799	137112199	DB_Ctrl_dev_H3K27me3_P39_vs_P0_up_623|4.45|1.14|3.31	0	.
chr18	13521399	13531599	DB_Ctrl_dev_H3K27me3_P39_vs_P0_up_625|4.05|-0.25|4.3	0	.
chr8	94946399	94955999	DB_Ctrl_dev_H3K27me3_P39_vs_P0_up_626|4.79|1.94|2.85	0	.
chr15	101876199	101894599	DB_Ctrl_dev_H3K27me3_P39_vs_P0_up_627|5.09|2.4|2.69	0	.
chr12	105272799	105288399	DB_Ctrl_dev_H3K27me3_P39_vs_P0_up_628|5.12|2.71|2.42	0	.
chr10	85375399	85383399	DB_Ctrl_dev_H3K27me3_P39_vs_P0_up_629|4.09|0.24|3.85	0	.
chr2	159282399	159293599	DB_Ctrl_dev_H3K27me3_P39_vs_P0_up_630|4.05|-0.25|4.3	0	.
chr1	165743199	165753399	DB_Ctrl_dev_H3K27me3_P39_vs_P0_up_632|4.04|-0.25|4.29	0	.
chr9	116821599	116828599	DB_Ctrl_dev_H3K27me3_P39_vs_P0_up_637|4.08|0.24|3.84	0	.
chr11	120508199	120516799	DB_Ctrl_dev_H3K27me3_P39_vs_P0_up_643|4.26|0.88|3.38	0	.
chr4	12596199	12605399	DB_Ctrl_dev_H3K27me3_P39_vs_P0_up_645|4.03|-0.25|4.28	0	.
chr19	24677799	24687799	DB_Ctrl_dev_H3K27me3_P39_vs_P0_up_646|4.43|1.14|3.29	0	.
chr16	63028599	63036999	DB_Ctrl_dev_H3K27me3_P39_vs_P0_up_647|4.02|-0.25|4.27	0	.
chr6	97566399	97580399	DB_Ctrl_dev_H3K27me3_P39_vs_P0_up_648|4.43|1.14|3.29	0	.
chr3	83747999	83757199	DB_Ctrl_dev_H3K27me3_P39_vs_P0_up_649|4.03|-0.25|4.27	0	.
chr6	126316799	126333199	DB_Ctrl_dev_H3K27me3_P39_vs_P0_up_650|4.78|1.94|2.84	0	.
chr15	11081399	11092199	DB_Ctrl_dev_H3K27me3_P39_vs_P0_up_653|4.02|-0.25|4.27	0	.
chr2	158999199	159012399	DB_Ctrl_dev_H3K27me3_P39_vs_P0_up_654|4.26|0.88|3.38	0	.
chr1	186548799	186560799	DB_Ctrl_dev_H3K27me3_P39_vs_P0_up_655|4.25|0.88|3.37	0	.
chr4	84261999	84274399	DB_Ctrl_dev_H3K27me3_P39_vs_P0_up_656|4.02|-0.25|4.26	0	.
chr11	88817999	88827599	DB_Ctrl_dev_H3K27me3_P39_vs_P0_up_659|4.11|0.42|3.68	0	.
chr8	89425799	89434799	DB_Ctrl_dev_H3K27me3_P39_vs_P0_up_660|4.17|0.61|3.56	0	.
chr8	89991999	90001399	DB_Ctrl_dev_H3K27me3_P39_vs_P0_up_663|4.08|0.42|3.65	0	.
chr18	53547799	53555399	DB_Ctrl_dev_H3K27me3_P39_vs_P0_up_666|4.08|0.42|3.65	0	.
chr2	13573999	13580599	DB_Ctrl_dev_H3K27me3_P39_vs_P0_up_667|4|-0.25|4.25	0	.
chr11	34357999	34367999	DB_Ctrl_dev_H3K27me3_P39_vs_P0_up_668|4.01|-0.25|4.26	0	.
chr2	57060799	57070799	DB_Ctrl_dev_H3K27me3_P39_vs_P0_up_669|4|-0.25|4.25	0	.
chr5	27029199	27037999	DB_Ctrl_dev_H3K27me3_P39_vs_P0_up_672|3.99|-0.25|4.24	0	.
chr3	115771799	115777799	DB_Ctrl_dev_H3K27me3_P39_vs_P0_up_673|4.17|0.61|3.56	0	.
chr2	22182999	22190999	DB_Ctrl_dev_H3K27me3_P39_vs_P0_up_674|4.16|0.61|3.55	0	.
chr11	76253199	76270599	DB_Ctrl_dev_H3K27me3_P39_vs_P0_up_675|4.86|2.12|2.75	0	.
chr6	145698599	145712199	DB_Ctrl_dev_H3K27me3_P39_vs_P0_up_676|4.68|1.69|2.99	0	.
chr6	141015799	141024599	DB_Ctrl_dev_H3K27me3_P39_vs_P0_up_677|3.98|-0.25|4.23	0	.
chr13	32407999	32415199	DB_Ctrl_dev_H3K27me3_P39_vs_P0_up_680|3.98|-0.25|4.23	0	.
chr7	115562399	115576599	DB_Ctrl_dev_H3K27me3_P39_vs_P0_up_681|5.02|2.72|2.3	0	.
chr4	89768799	89780399	DB_Ctrl_dev_H3K27me3_P39_vs_P0_up_683|3.98|-0.25|4.23	0	.
chr18	74614999	74623399	DB_Ctrl_dev_H3K27me3_P39_vs_P0_up_684|3.98|-0.25|4.23	0	.
chr8	89396199	89404599	DB_Ctrl_dev_H3K27me3_P39_vs_P0_up_685|4.03|0.24|3.79	0	.
chr11	32807599	32820799	DB_Ctrl_dev_H3K27me3_P39_vs_P0_up_687|3.97|-0.25|4.22	0	.
chr13	71098999	71106999	DB_Ctrl_dev_H3K27me3_P39_vs_P0_up_688|4.05|0.42|3.63	0	.
chr1	138383399	138393799	DB_Ctrl_dev_H3K27me3_P39_vs_P0_up_690|3.96|-0.25|4.21	0	.
chr10	87215199	87223799	DB_Ctrl_dev_H3K27me3_P39_vs_P0_up_692|4.04|0.42|3.62	0	.
chr3	84701199	84707999	DB_Ctrl_dev_H3K27me3_P39_vs_P0_up_694|4.01|-0.25|4.26	0	.
chr18	52784999	52794999	DB_Ctrl_dev_H3K27me3_P39_vs_P0_up_696|4.38|1.14|3.24	0	.
chr9	47097599	47105799	DB_Ctrl_dev_H3K27me3_P39_vs_P0_up_697|3.95|-0.25|4.2	0	.
chr7	93059399	93070999	DB_Ctrl_dev_H3K27me3_P39_vs_P0_up_698|3.96|-0.25|4.21	0	.
chr17	73323799	73331199	DB_Ctrl_dev_H3K27me3_P39_vs_P0_up_699|3.96|-0.25|4.2	0	.
chr14	33757599	33767199	DB_Ctrl_dev_H3K27me3_P39_vs_P0_up_701|3.94|-0.25|4.19	0	.
chr4	111838999	111847599	DB_Ctrl_dev_H3K27me3_P39_vs_P0_up_702|3.96|-0.25|4.21	0	.
chr11	33690799	33698199	DB_Ctrl_dev_H3K27me3_P39_vs_P0_up_706|3.94|-0.25|4.19	0	.
chr10	39624199	39630999	DB_Ctrl_dev_H3K27me3_P39_vs_P0_up_708|3.93|-0.25|4.18	0	.
chr8	25392199	25401799	DB_Ctrl_dev_H3K27me3_P39_vs_P0_up_711|3.94|-0.25|4.18	0	.
chr15	6318199	6324999	DB_Ctrl_dev_H3K27me3_P39_vs_P0_up_713|3.94|-0.25|4.18	0	.
chr15	88310399	88318999	DB_Ctrl_dev_H3K27me3_P39_vs_P0_up_714|4.17|0.88|3.29	0	.
chr8	78229399	78237399	DB_Ctrl_dev_H3K27me3_P39_vs_P0_up_716|3.93|-0.25|4.17	0	.
chr5	96905599	96913999	DB_Ctrl_dev_H3K27me3_P39_vs_P0_up_717|3.92|-0.25|4.17	0	.
chr1	184580599	184589799	DB_Ctrl_dev_H3K27me3_P39_vs_P0_up_719|3.93|-0.25|4.17	0	.
chr1	190575799	190583799	DB_Ctrl_dev_H3K27me3_P39_vs_P0_up_721|3.92|-0.25|4.16	0	.
chr11	34348799	34357199	DB_Ctrl_dev_H3K27me3_P39_vs_P0_up_723|3.93|-0.25|4.18	0	.
chr5	29946399	29956599	DB_Ctrl_dev_H3K27me3_P39_vs_P0_up_724|4.24|0.9|3.34	0	.
chr10	111783599	111794199	DB_Ctrl_dev_H3K27me3_P39_vs_P0_up_725|4.35|1.14|3.21	0	.
chr12	73366399	73377199	DB_Ctrl_dev_H3K27me3_P39_vs_P0_up_727|4.35|1.14|3.21	0	.
chr11	19051999	19061399	DB_Ctrl_dev_H3K27me3_P39_vs_P0_up_728|3.92|-0.25|4.17	0	.
chr2	146717999	146727199	DB_Ctrl_dev_H3K27me3_P39_vs_P0_up_729|4.46|1.35|3.11	0	.
chr16	88422599	88434399	DB_Ctrl_dev_H3K27me3_P39_vs_P0_up_730|4.44|1.52|2.92	0	.
chr14	33792599	33802599	DB_Ctrl_dev_H3K27me3_P39_vs_P0_up_731|4.35|1.23|3.12	0	.
chr9	73557599	73567799	DB_Ctrl_dev_H3K27me3_P39_vs_P0_up_732|3.91|-0.25|4.16	0	.
chr9	77470399	77480799	DB_Ctrl_dev_H3K27me3_P39_vs_P0_up_733|4.65|1.69|2.96	0	.
chr17	72392399	72398199	DB_Ctrl_dev_H3K27me3_P39_vs_P0_up_734|3.91|-0.25|4.16	0	.
chr13	111943399	111950599	DB_Ctrl_dev_H3K27me3_P39_vs_P0_up_736|3.9|-0.25|4.15	0	.
chr17	72358799	72369199	DB_Ctrl_dev_H3K27me3_P39_vs_P0_up_737|3.9|-0.25|4.15	0	.
chr10	82246799	82256399	DB_Ctrl_dev_H3K27me3_P39_vs_P0_up_738|3.9|-0.25|4.14	0	.
chr6	146200199	146211599	DB_Ctrl_dev_H3K27me3_P39_vs_P0_up_739|3.9|-0.25|4.14	0	.
chr7	82333399	82346799	DB_Ctrl_dev_H3K27me3_P39_vs_P0_up_740|4.71|1.84|2.87	0	.
chr2	169921999	169931799	DB_Ctrl_dev_H3K27me3_P39_vs_P0_up_741|3.91|-0.25|4.16	0	.
chr16	13573399	13582999	DB_Ctrl_dev_H3K27me3_P39_vs_P0_up_743|3.9|-0.25|4.14	0	.
chr1	130297599	130307199	DB_Ctrl_dev_H3K27me3_P39_vs_P0_up_744|4.32|1.23|3.1	0	.
chr2	167857599	167869799	DB_Ctrl_dev_H3K27me3_P39_vs_P0_up_745|3.89|-0.25|4.14	0	.
chr7	119063399	119069199	DB_Ctrl_dev_H3K27me3_P39_vs_P0_up_747|3.89|-0.25|4.14	0	.
chr11	33868999	33879999	DB_Ctrl_dev_H3K27me3_P39_vs_P0_up_749|3.88|-0.25|4.13	0	.
chr5	51282199	51291599	DB_Ctrl_dev_H3K27me3_P39_vs_P0_up_750|3.88|-0.25|4.13	0	.
chr9	41789399	41795999	DB_Ctrl_dev_H3K27me3_P39_vs_P0_up_753|3.88|-0.25|4.13	0	.
chr6	53228599	53235799	DB_Ctrl_dev_H3K27me3_P39_vs_P0_up_754|3.88|-0.25|4.12	0	.
chr15	86846999	86855199	DB_Ctrl_dev_H3K27me3_P39_vs_P0_up_755|3.88|-0.25|4.13	0	.
chr1	167768199	167779799	DB_Ctrl_dev_H3K27me3_P39_vs_P0_up_757|4.52|1.75|2.77	0	.
chr15	6300999	6308399	DB_Ctrl_dev_H3K27me3_P39_vs_P0_up_759|4.06|0.61|3.45	0	.
chr1	186540599	186547999	DB_Ctrl_dev_H3K27me3_P39_vs_P0_up_760|3.87|-0.25|4.12	0	.
chr17	28378999	28389599	DB_Ctrl_dev_H3K27me3_P39_vs_P0_up_761|3.87|-0.25|4.12	0	.
chr16	88124199	88134199	DB_Ctrl_dev_H3K27me3_P39_vs_P0_up_762|3.96|0.42|3.54	0	.
chr8	116107999	116118399	DB_Ctrl_dev_H3K27me3_P39_vs_P0_up_764|4.33|1.14|3.18	0	.
chr3	66934399	66945999	DB_Ctrl_dev_H3K27me3_P39_vs_P0_up_765|3.87|-0.25|4.12	0	.
chr8	12516399	12525199	DB_Ctrl_dev_H3K27me3_P39_vs_P0_up_766|3.94|0.24|3.69	0	.
chr1	78015999	78027199	DB_Ctrl_dev_H3K27me3_P39_vs_P0_up_767|4.32|1.14|3.17	0	.
chr6	145666199	145672799	DB_Ctrl_dev_H3K27me3_P39_vs_P0_up_768|3.88|-0.25|4.13	0	.
chr10	39580599	39592199	DB_Ctrl_dev_H3K27me3_P39_vs_P0_up_770|3.87|-0.25|4.12	0	.
chr12	106220599	106228799	DB_Ctrl_dev_H3K27me3_P39_vs_P0_up_771|3.87|-0.25|4.12	0	.
chr12	91637399	91646799	DB_Ctrl_dev_H3K27me3_P39_vs_P0_up_773|3.86|-0.25|4.11	0	.
chr7	119082999	119091199	DB_Ctrl_dev_H3K27me3_P39_vs_P0_up_774|3.86|-0.25|4.11	0	.
chr9	61358599	61365399	DB_Ctrl_dev_H3K27me3_P39_vs_P0_up_775|3.86|-0.25|4.11	0	.
chr1	125832399	125841199	DB_Ctrl_dev_H3K27me3_P39_vs_P0_up_776|3.86|-0.25|4.11	0	.
chr10	22777399	22784999	DB_Ctrl_dev_H3K27me3_P39_vs_P0_up_778|3.86|-0.25|4.11	0	.
chr4	63238199	63270799	DB_Ctrl_dev_H3K27me3_P39_vs_P0_up_779|6.23|4.94|1.29	0	.
chr12	48383199	48393199	DB_Ctrl_dev_H3K27me3_P39_vs_P0_up_781|4.18|1.02|3.17	0	.
chr6	141171399	141183999	DB_Ctrl_dev_H3K27me3_P39_vs_P0_up_783|3.85|-0.25|4.1	0	.
chr9	77506999	77513999	DB_Ctrl_dev_H3K27me3_P39_vs_P0_up_784|3.85|-0.25|4.1	0	.
chr13	47293199	47300399	DB_Ctrl_dev_H3K27me3_P39_vs_P0_up_785|3.85|-0.25|4.1	0	.
chr17	88402199	88408599	DB_Ctrl_dev_H3K27me3_P39_vs_P0_up_786|3.86|-0.25|4.1	0	.
chr11	39713399	39720399	DB_Ctrl_dev_H3K27me3_P39_vs_P0_up_787|3.85|-0.25|4.1	0	.
chr18	74554799	74562999	DB_Ctrl_dev_H3K27me3_P39_vs_P0_up_790|4.31|1.14|3.17	0	.
chr2	135744799	135761399	DB_Ctrl_dev_H3K27me3_P39_vs_P0_up_793|5.01|2.86|2.15	0	.
chr8	25511999	25517799	DB_Ctrl_dev_H3K27me3_P39_vs_P0_up_794|3.85|-0.25|4.1	0	.
chr5	22790399	22799199	DB_Ctrl_dev_H3K27me3_P39_vs_P0_up_795|3.86|-0.25|4.11	0	.
chr1	78008199	78014799	DB_Ctrl_dev_H3K27me3_P39_vs_P0_up_796|3.84|-0.25|4.09	0	.
chr4	65243199	65254599	DB_Ctrl_dev_H3K27me3_P39_vs_P0_up_798|4.29|1.23|3.06	0	.
chr14	28795599	28800199	DB_Ctrl_dev_H3K27me3_P39_vs_P0_up_800|3.84|-0.25|4.09	0	.
chr3	102170999	102176999	DB_Ctrl_dev_H3K27me3_P39_vs_P0_up_801|3.84|-0.25|4.09	0	.
chr9	116873199	116883999	DB_Ctrl_dev_H3K27me3_P39_vs_P0_up_802|3.94|0.42|3.51	0	.
chr13	71686799	71693599	DB_Ctrl_dev_H3K27me3_P39_vs_P0_up_803|3.95|0.42|3.52	0	.
chr15	86828599	86839399	DB_Ctrl_dev_H3K27me3_P39_vs_P0_up_804|3.85|-0.25|4.1	0	.
chr5	67132799	67144199	DB_Ctrl_dev_H3K27me3_P39_vs_P0_up_806|4.74|2.29|2.45	0	.
chr17	86946999	86952999	DB_Ctrl_dev_H3K27me3_P39_vs_P0_up_808|3.83|-0.25|4.08	0	.
chr7	115742599	115759199	DB_Ctrl_dev_H3K27me3_P39_vs_P0_up_810|5.1|2.58|2.52	0	.
chr3	145612399	145626199	DB_Ctrl_dev_H3K27me3_P39_vs_P0_up_811|4.7|2.03|2.67	0	.
chr1	89383999	89395999	DB_Ctrl_dev_H3K27me3_P39_vs_P0_up_812|4.67|1.84|2.84	0	.
chr18	44790799	44798599	DB_Ctrl_dev_H3K27me3_P39_vs_P0_up_814|3.9|0.24|3.65	0	.
chr9	116790399	116820799	DB_Ctrl_dev_H3K27me3_P39_vs_P0_up_815|6.5|5.21|1.29	0	.
chr13	114570399	114578599	DB_Ctrl_dev_H3K27me3_P39_vs_P0_up_817|3.84|-0.25|4.08	0	.
chr2	117594799	117604599	DB_Ctrl_dev_H3K27me3_P39_vs_P0_up_818|3.84|-0.25|4.08	0	.
chr3	115853799	115860799	DB_Ctrl_dev_H3K27me3_P39_vs_P0_up_819|4.48|1.68|2.8	0	.
chr16	19755999	19762399	DB_Ctrl_dev_H3K27me3_P39_vs_P0_up_820|3.82|-0.25|4.07	0	.
chr15	65479599	65486799	DB_Ctrl_dev_H3K27me3_P39_vs_P0_up_821|3.82|-0.25|4.07	0	.
chr4	84759999	84771199	DB_Ctrl_dev_H3K27me3_P39_vs_P0_up_822|4.41|1.35|3.06	0	.
chr18	55374799	55387799	DB_Ctrl_dev_H3K27me3_P39_vs_P0_up_823|4.75|1.97|2.78	0	.
chr1	61260199	61273799	DB_Ctrl_dev_H3K27me3_P39_vs_P0_up_824|4.47|1.68|2.78	0	.
chr8	40184399	40192599	DB_Ctrl_dev_H3K27me3_P39_vs_P0_up_825|4.02|0.61|3.41	0	.
chr13	72777999	72786399	DB_Ctrl_dev_H3K27me3_P39_vs_P0_up_826|3.83|-0.25|4.08	0	.
chr12	20226799	20234399	DB_Ctrl_dev_H3K27me3_P39_vs_P0_up_828|4.78|2.3|2.48	0	.
chr7	129643399	129651399	DB_Ctrl_dev_H3K27me3_P39_vs_P0_up_830|3.82|-0.25|4.06	0	.
chr6	52670599	52678399	DB_Ctrl_dev_H3K27me3_P39_vs_P0_up_831|3.81|-0.25|4.06	0	.
chr1	106123599	106130999	DB_Ctrl_dev_H3K27me3_P39_vs_P0_up_832|3.81|-0.25|4.06	0	.
chr2	118207799	118213999	DB_Ctrl_dev_H3K27me3_P39_vs_P0_up_833|3.81|-0.25|4.06	0	.
chr2	82579799	82587799	DB_Ctrl_dev_H3K27me3_P39_vs_P0_up_834|3.81|-0.25|4.06	0	.
chr5	117895799	117904599	DB_Ctrl_dev_H3K27me3_P39_vs_P0_up_837|3.82|-0.25|4.06	0	.
chr9	55045799	55051599	DB_Ctrl_dev_H3K27me3_P39_vs_P0_up_838|4|0.61|3.39	0	.
chr3	129410599	129419599	DB_Ctrl_dev_H3K27me3_P39_vs_P0_up_839|3.8|-0.25|4.05	0	.
chr2	170451199	170458999	DB_Ctrl_dev_H3K27me3_P39_vs_P0_up_840|3.8|-0.25|4.05	0	.
chr13	56225399	56232599	DB_Ctrl_dev_H3K27me3_P39_vs_P0_up_841|3.8|-0.25|4.05	0	.
chr6	100102399	100114799	DB_Ctrl_dev_H3K27me3_P39_vs_P0_up_842|4.59|1.88|2.71	0	.
chr16	75855999	75862999	DB_Ctrl_dev_H3K27me3_P39_vs_P0_up_843|3.91|0.42|3.49	0	.
chr15	11096199	11103799	DB_Ctrl_dev_H3K27me3_P39_vs_P0_up_844|3.8|-0.25|4.05	0	.
chr6	145737999	145746199	DB_Ctrl_dev_H3K27me3_P39_vs_P0_up_845|4.07|0.88|3.19	0	.
chr5	44095199	44106599	DB_Ctrl_dev_H3K27me3_P39_vs_P0_up_846|5.03|2.85|2.18	0	.
chr2	57791399	57800199	DB_Ctrl_dev_H3K27me3_P39_vs_P0_up_848|3.8|-0.25|4.04	0	.
chr7	115577399	115588399	DB_Ctrl_dev_H3K27me3_P39_vs_P0_up_849|4.49|1.53|2.96	0	.
chr15	86731199	86741399	DB_Ctrl_dev_H3K27me3_P39_vs_P0_up_850|3.89|0.24|3.65	0	.
chr1	150896199	150902399	DB_Ctrl_dev_H3K27me3_P39_vs_P0_up_851|3.8|-0.25|4.04	0	.
chr5	19192599	19201799	DB_Ctrl_dev_H3K27me3_P39_vs_P0_up_852|3.81|-0.25|4.05	0	.
chr6	146273199	146281199	DB_Ctrl_dev_H3K27me3_P39_vs_P0_up_853|3.85|-0.25|4.1	0	.
chr18	13981599	13990999	DB_Ctrl_dev_H3K27me3_P39_vs_P0_up_855|3.8|-0.25|4.04	0	.
chr1	184783999	184789599	DB_Ctrl_dev_H3K27me3_P39_vs_P0_up_856|3.79|-0.25|4.04	0	.
chr10	60884999	60893799	DB_Ctrl_dev_H3K27me3_P39_vs_P0_up_857|4.27|1.14|3.12	0	.
chr12	110294199	110302599	DB_Ctrl_dev_H3K27me3_P39_vs_P0_up_858|3.99|0.61|3.38	0	.
chr9	116096199	116102399	DB_Ctrl_dev_H3K27me3_P39_vs_P0_up_859|3.79|-0.25|4.04	0	.
chr2	171737799	171745999	DB_Ctrl_dev_H3K27me3_P39_vs_P0_up_860|3.79|-0.25|4.03	0	.
chr1	167923999	167931999	DB_Ctrl_dev_H3K27me3_P39_vs_P0_up_862|3.78|-0.25|4.03	0	.
chr18	14002199	14011799	DB_Ctrl_dev_H3K27me3_P39_vs_P0_up_863|3.78|-0.25|4.03	0	.
chr7	76048199	76053399	DB_Ctrl_dev_H3K27me3_P39_vs_P0_up_864|3.78|-0.25|4.03	0	.
chr2	169163999	169171999	DB_Ctrl_dev_H3K27me3_P39_vs_P0_up_865|3.8|-0.25|4.05	0	.
chr5	51382599	51390399	DB_Ctrl_dev_H3K27me3_P39_vs_P0_up_866|3.78|-0.25|4.03	0	.
chr4	147446999	147457199	DB_Ctrl_dev_H3K27me3_P39_vs_P0_up_867|4.01|0.61|3.4	0	.
chr18	46891799	46900799	DB_Ctrl_dev_H3K27me3_P39_vs_P0_up_870|3.79|-0.25|4.04	0	.
chr9	32492599	32497999	DB_Ctrl_dev_H3K27me3_P39_vs_P0_up_872|3.77|-0.25|4.02	0	.
chr9	89490599	89498799	DB_Ctrl_dev_H3K27me3_P39_vs_P0_up_873|3.77|-0.25|4.02	0	.
chr13	112047399	112055599	DB_Ctrl_dev_H3K27me3_P39_vs_P0_up_874|3.77|-0.25|4.02	0	.
chr2	10407399	10415799	DB_Ctrl_dev_H3K27me3_P39_vs_P0_up_875|3.77|-0.25|4.02	0	.
chr18	13765799	13774399	DB_Ctrl_dev_H3K27me3_P39_vs_P0_up_876|3.97|0.61|3.36	0	.
chr5	22946999	22953999	DB_Ctrl_dev_H3K27me3_P39_vs_P0_up_877|3.77|-0.25|4.01	0	.
chr5	127317599	127325199	DB_Ctrl_dev_H3K27me3_P39_vs_P0_up_878|3.85|0.24|3.61	0	.
chr2	113978199	113986599	DB_Ctrl_dev_H3K27me3_P39_vs_P0_up_879|3.77|-0.25|4.01	0	.
chr7	136793599	136806999	DB_Ctrl_dev_H3K27me3_P39_vs_P0_up_880|3.97|0.61|3.36	0	.
chr4	143432599	143440199	DB_Ctrl_dev_H3K27me3_P39_vs_P0_up_882|3.77|-0.25|4.01	0	.
chr2	76226199	76233999	DB_Ctrl_dev_H3K27me3_P39_vs_P0_up_884|3.77|-0.25|4.01	0	.
chr2	172793399	172802199	DB_Ctrl_dev_H3K27me3_P39_vs_P0_up_885|3.77|-0.25|4.01	0	.
chr1	105493399	105503199	DB_Ctrl_dev_H3K27me3_P39_vs_P0_up_887|4.55|1.74|2.81	0	.
chr16	23819399	23831799	DB_Ctrl_dev_H3K27me3_P39_vs_P0_up_889|3.87|-0.25|4.12	0	.
chr12	71767199	71774999	DB_Ctrl_dev_H3K27me3_P39_vs_P0_up_891|3.78|-0.25|4.03	0	.
chr18	58650999	58659199	DB_Ctrl_dev_H3K27me3_P39_vs_P0_up_893|3.76|-0.25|4	0	.
chr17	72271399	72279199	DB_Ctrl_dev_H3K27me3_P39_vs_P0_up_894|3.76|-0.25|4.01	0	.
chr6	53342799	53351399	DB_Ctrl_dev_H3K27me3_P39_vs_P0_up_895|3.76|-0.25|4.01	0	.
chr13	56671799	56677999	DB_Ctrl_dev_H3K27me3_P39_vs_P0_up_897|3.76|-0.25|4	0	.
chr13	48039599	48047199	DB_Ctrl_dev_H3K27me3_P39_vs_P0_up_898|3.84|0.24|3.6	0	.
chr11	12072199	12078599	DB_Ctrl_dev_H3K27me3_P39_vs_P0_up_900|3.75|-0.25|4	0	.
chr19	24777799	24788399	DB_Ctrl_dev_H3K27me3_P39_vs_P0_up_901|4.21|1.23|2.99	0	.
chr13	72228599	72235999	DB_Ctrl_dev_H3K27me3_P39_vs_P0_up_902|3.76|-0.25|4.01	0	.
chr1	190551799	190559599	DB_Ctrl_dev_H3K27me3_P39_vs_P0_up_903|3.75|-0.25|3.99	0	.
chr6	4485399	4493199	DB_Ctrl_dev_H3K27me3_P39_vs_P0_up_905|3.75|-0.25|3.99	0	.
chr11	18009599	18015599	DB_Ctrl_dev_H3K27me3_P39_vs_P0_up_906|4.09|0.9|3.19	0	.
chr11	57745399	57752999	DB_Ctrl_dev_H3K27me3_P39_vs_P0_up_909|3.75|-0.25|4	0	.
chr16	94061399	94069599	DB_Ctrl_dev_H3K27me3_P39_vs_P0_up_911|3.75|-0.25|4	0	.
chr17	72382199	72391599	DB_Ctrl_dev_H3K27me3_P39_vs_P0_up_912|3.97|0.61|3.36	0	.
chr13	28883799	28887799	DB_Ctrl_dev_H3K27me3_P39_vs_P0_up_913|3.77|-0.25|4.02	0	.
chr14	101555199	101564999	DB_Ctrl_dev_H3K27me3_P39_vs_P0_up_914|4.69|2.18|2.51	0	.
chr16	43541399	43551999	DB_Ctrl_dev_H3K27me3_P39_vs_P0_up_915|3.97|0.61|3.36	0	.
chr6	146415799	146421199	DB_Ctrl_dev_H3K27me3_P39_vs_P0_up_916|3.74|-0.25|3.98	0	.
chr1	40227999	40234199	DB_Ctrl_dev_H3K27me3_P39_vs_P0_up_917|3.74|-0.25|3.98	0	.
chr9	14713799	14720199	DB_Ctrl_dev_H3K27me3_P39_vs_P0_up_918|3.74|-0.25|3.98	0	.
chr2	79373199	79383999	DB_Ctrl_dev_H3K27me3_P39_vs_P0_up_919|3.76|-0.25|4.01	0	.
chr11	34189799	34197999	DB_Ctrl_dev_H3K27me3_P39_vs_P0_up_920|3.74|-0.25|3.98	0	.
chr11	39775199	39784199	DB_Ctrl_dev_H3K27me3_P39_vs_P0_up_921|3.73|-0.25|3.98	0	.
chr13	107661199	107669799	DB_Ctrl_dev_H3K27me3_P39_vs_P0_up_922|3.73|-0.25|3.98	0	.
chr4	64613999	64622199	DB_Ctrl_dev_H3K27me3_P39_vs_P0_up_925|3.85|0.42|3.43	0	.
chr18	13750599	13758399	DB_Ctrl_dev_H3K27me3_P39_vs_P0_up_926|3.95|0.75|3.2	0	.
chr6	140757599	140782399	DB_Ctrl_dev_H3K27me3_P39_vs_P0_up_927|6.11|4.61|1.5	0	.
chr6	95684199	95693999	DB_Ctrl_dev_H3K27me3_P39_vs_P0_up_928|3.73|-0.25|3.98	0	.
chr14	33880199	33891799	DB_Ctrl_dev_H3K27me3_P39_vs_P0_up_929|4.08|0.9|3.18	0	.
chr18	81503999	81515799	DB_Ctrl_dev_H3K27me3_P39_vs_P0_up_932|5.09|3.1|1.99	0	.
chr8	89667199	89680999	DB_Ctrl_dev_H3K27me3_P39_vs_P0_up_934|4.53|1.95|2.58	0	.
chr6	146110399	146115599	DB_Ctrl_dev_H3K27me3_P39_vs_P0_up_935|3.75|-0.25|4	0	.
chr8	11994599	12001999	DB_Ctrl_dev_H3K27me3_P39_vs_P0_up_936|3.72|-0.25|3.97	0	.
chr18	13922799	13929999	DB_Ctrl_dev_H3K27me3_P39_vs_P0_up_937|3.73|-0.25|3.97	0	.
chr15	88353599	88365999	DB_Ctrl_dev_H3K27me3_P39_vs_P0_up_938|4.34|1.35|2.99	0	.
[truncated: 615 more rows]

## Sheet: P0 > P39
chrom	start	end	name (id|log2_P39|log2_P0|log2_diff)	score	strand
[truncated: 680 more rows]
