# Supplementary material for: Dnmt3a knockout in excitatory neurons impairs postnatal synapse maturation and increases the repressive histone modification H3K27me3
Source: eLife. 2022 May 23;11:e66909. doi: 10.7554/eLife.66909 (PMC9170249; doi:10.7554/eLife.66909)
Supplement: Supplementary file 10. [file elife-66909-supp10.xlsx]

## Sheet: Readme
Supplementary File 10. List of DNA methylation valleys (DMVs).
DMVs were defined as UMRs (undermethylated regions, identified using MethylSeekR) with length >= 5kb and mean methylation level <= 15%. See the "Methods" section for details.
The tables were imported from BED6 files, in which the coordinates are from the mm10 genome and 0-based.
The "name" field contains the following information of each DMV in order, separated by the pipe symbol ("|"): unique DMV id, the number of CG sites covered by at least 5 reads in the DMV, the number of CG sites in the DMV, the sum of reads representing methylated cytosines in the DMV, the sum of covered reads in the DMV, the mean mCG level in the DMV.
The "score" field shows the median mCG levels by each cytosine site in the DMV. And the "strand" field is filled with all "." signs to indicate no strand information for DMVs.

## Sheet: P39 Control, DMVs
chrom	start	end	name	score	strand
chr1	4490503	4498490	UMR_4|293|293|915|20869|0.044	0.014	.
chr1	5017908	5024100	UMR_10|227|227|622|15370|0.040	0.006	.
chr1	19101559	19112932	UMR_82|209|209|1508|22423|0.067	0.041	.
chr1	19205504	19242472	UMR_83|587|587|2835|61121|0.046	0.022	.
chr1	21957819	21963675	UMR_94|196|196|390|11614|0.034	0.008	.
chr1	25823708	25830234	UMR_122|137|137|587|13060|0.045	0.013	.
chr1	42690426	42704778	UMR_290|581|581|2145|36406|0.059	0.01	.
chr1	50924555	50929792	UMR_315|140|140|169|10392|0.016	0.005	.
chr1	52228389	52234454	UMR_329|190|190|488|10547|0.046	0	.
chr1	56961832	56982046	UMR_365|548|548|3245|41395|0.078	0.01	.
chr1	59762019	59767296	UMR_406|230|230|158|12579|0.013	0	.
chr1	62702544	62708328	UMR_430|266|266|309|15974|0.019	0.005	.
chr1	64114759	64122852	UMR_449|187|187|353|14859|0.024	0.003	.
chr1	66320704	66326449	UMR_473|42|42|66|5090|0.013	0.005	.
chr1	72869989	72876580	UMR_521|204|204|135|16847|0.008	0.004	.
chr1	74235828	74241186	UMR_531|159|159|208|10451|0.020	0.003	.
chr1	74854075	74860877	UMR_556|300|300|230|16209|0.014	0	.
chr1	77510831	77517358	UMR_609|239|239|619|17034|0.036	0.005	.
chr1	78186857	78204514	UMR_616|502|502|1451|43056|0.034	0.019	.
chr1	81075973	81081113	UMR_643|42|42|227|5317|0.043	0.01	.
chr1	85893970	85902418	UMR_675|156|156|515|11626|0.044	0.008	.
chr1	86524494	86533777	UMR_698|438|445|1023|23791|0.043	0.006	.
chr1	89926555	89936708	UMR_758|437|437|1019|30078|0.034	0.016	.
chr1	97657391	97662672	UMR_855|242|242|407|12745|0.032	0	.
chr1	120593663	120607984	UMR_926|491|491|1211|35197|0.034	0.02	.
chr1	120609374	120617786	UMR_927|133|133|1051|11118|0.095	0.031	.
chr1	127933640	127938644	UMR_956|40|40|616|4749|0.130	0.068	.
chr1	128101941	128107045	UMR_963|125|125|333|9132|0.036	0.003	.
chr1	131519789	131528938	UMR_989|262|262|410|17136|0.024	0.003	.
chr1	135579597	135586222	UMR_1124|190|190|724|11750|0.062	0.007	.
chr1	136129989	136141080	UMR_1149|216|216|829|13078|0.063	0.011	.
chr1	137897701	137904351	UMR_1176|78|78|363|9876|0.037	0.006	.
chr1	138836015	138849911	UMR_1187|361|361|2163|28419|0.076	0.029	.
chr1	143639849	143648384	UMR_1200|64|64|923|9524|0.097	0.04	.
chr1	146493591	146499090	UMR_1208|91|91|685|9211|0.074	0.004	.
chr1	154721839	154727524	UMR_1276|123|123|453|10099|0.045	0.006	.
chr1	155731971	155743932	UMR_1304|394|394|786|27706|0.028	0.013	.
chr1	161033344	161040782	UMR_1352|143|143|381|10418|0.037	0.004	.
chr1	164452447	164460384	UMR_1382|241|241|529|16431|0.032	0.003	.
chr1	167687527	167694394	UMR_1440|273|273|762|19343|0.039	0.015	.
chr1	168423130	168432974	UMR_1447|168|168|648|19211|0.034	0.006	.
chr1	171032542	171039228	UMR_1470|183|183|703|21131|0.033	0.004	.
chr1	171070047	171081618	UMR_1473|79|660|548|3649|0.150	0.086	.
chr1	172200479	172207720	UMR_1506|115|115|151|8365|0.018	0.009	.
chr1	172309452	172315481	UMR_1509|150|150|469|9278|0.051	0.004	.
chr1	177253949	177259352	UMR_1547|221|221|153|7523|0.020	0	.
chr1	177442843	177454042	UMR_1552|189|189|1456|18835|0.077	0.067	.
chr1	178333329	178338828	UMR_1562|255|255|298|14760|0.020	0	.
chr1	184715713	184738380	UMR_1689|582|583|2217|45830|0.048	0.022	.
chr1	187605283	187610393	UMR_1734|232|233|1473|15244|0.097	0.06	.
chr1	190167975	190175592	UMR_1767|328|328|567|21190|0.027	0.016	.
chr1	194618751	194630958	UMR_1834|182|182|456|11958|0.038	0.004	.
chr10	4386212	4391355	UMR_1852|298|298|489|11730|0.042	0.004	.
chr10	9896455	9902496	UMR_1911|206|206|373|16369|0.023	0.007	.
chr10	13963873	13971148	UMR_1948|330|330|845|19044|0.044	0.005	.
chr10	17721464	17728538	UMR_1964|254|254|872|17309|0.050	0.004	.
chr10	19351463	19363727	UMR_1994|270|270|1651|24288|0.068	0.032	.
chr10	22148210	22160177	UMR_2039|428|430|758|23886|0.032	0.007	.
chr10	22811779	22823037	UMR_2050|239|239|918|22226|0.041	0.021	.
chr10	28073593	28078726	UMR_2087|165|165|305|11187|0.027	0	.
chr10	29142986	29149462	UMR_2088|187|187|351|13298|0.026	0.003	.
chr10	29532676	29540176	UMR_2093|142|142|708|12333|0.057	0.006	.
chr10	34296483	34302666	UMR_2115|116|116|673|11976|0.056	0.007	.
chr10	37134941	37141754	UMR_2119|382|382|541|24103|0.022	0.004	.
chr10	40879947	40890662	UMR_2154|258|264|1110|20013|0.055	0.007	.
chr10	42578333	42586054	UMR_2191|352|352|1013|24390|0.042	0.016	.
chr10	42631459	42637598	UMR_2194|235|235|1145|17167|0.067	0.029	.
chr10	43170559	43175890	UMR_2204|246|246|259|15024|0.017	0.002	.
chr10	49780179	49789442	UMR_2241|150|150|794|13635|0.058	0.004	.
chr10	50890821	50905416	UMR_2243|438|438|1625|40413|0.040	0.017	.
chr10	58811153	58816515	UMR_2284|217|221|554|12537|0.044	0	.
chr10	59320819	59327536	UMR_2286|147|147|357|11440|0.031	0.007	.
chr10	62127981	62136591	UMR_2377|231|231|1371|15397|0.089	0.038	.
chr10	62336257	62341274	UMR_2384|130|130|912|8509|0.107	0.008	.
chr10	63021191	63027157	UMR_2403|212|212|326|15046|0.022	0	.
chr10	64083768	64090819	UMR_2423|152|152|877|15662|0.056	0.021	.
chr10	68274688	68280872	UMR_2472|198|198|155|18785|0.008	0.003	.
chr10	69705205	69711666	UMR_2504|77|77|592|7607|0.078	0.039	.
chr10	75059045	75064147	UMR_2578|272|272|483|13552|0.036	0.01	.
chr10	79853015	79858894	UMR_2718|224|224|422|12250|0.034	0	.
chr10	80147478	80153264	UMR_2747|303|303|157|13281|0.012	0	.
chr10	80573167	80579615	UMR_2800|287|287|553|13001|0.043	0.008	.
chr10	80928484	80933980	UMR_2828|261|261|503|16404|0.031	0.007	.
chr10	81172979	81178003	UMR_2853|182|182|710|13284|0.053	0.006	.
chr10	81474843	81483196	UMR_2890|156|156|948|9720|0.098	0.011	.
chr10	84436001	84442038	UMR_2957|214|214|403|12619|0.032	0.004	.
chr10	90575389	90580711	UMR_3056|84|84|359|10148|0.035	0.008	.
chr10	90676065	90681986	UMR_3060|56|56|1074|7163|0.150	0.101	.
chr10	93160259	93166775	UMR_3096|221|221|875|14122|0.062	0.008	.
chr10	94940653	94946356	UMR_3149|292|292|683|13978|0.049	0.006	.
chr10	98913137	98921603	UMR_3184|344|344|968|17967|0.054	0.01	.
chr10	99260883	99268826	UMR_3194|291|291|806|20712|0.039	0.005	.
chr10	103025208	103032390	UMR_3208|206|206|803|19082|0.042	0.019	.
chr10	108160899	108166568	UMR_3220|207|207|418|11764|0.036	0	.
chr10	109002863	109012232	UMR_3227|145|145|492|14398|0.034	0.009	.
chr10	111472095	111477141	UMR_3254|160|160|531|9316|0.057	0.007	.
chr10	118865592	118870892	UMR_3346|265|265|717|12906|0.056	0.005	.
chr10	121471557	121477346	UMR_3404|206|206|1075|13065|0.082	0.013	.
chr10	126926925	126931937	UMR_3467|102|102|697|7210|0.097	0.018	.
chr10	126978082	126985040	UMR_3471|263|266|256|12120|0.021	0	.
chr10	127076172	127084132	UMR_3478|259|259|444|12584|0.035	0.005	.
chr10	127508281	127514182	UMR_3508|199|199|568|12339|0.046	0.008	.
chr10	128489397	128494937	UMR_3543|113|113|508|8134|0.062	0.006	.
chr11	18869567	18879671	UMR_3726|297|298|794|25710|0.031	0.018	.
chr11	19014313	19021758	UMR_3727|271|271|1591|22460|0.071	0.026	.
chr11	21567531	21572931	UMR_3761|100|100|365|9168|0.040	0.004	.
chr11	21992861	21998488	UMR_3762|318|318|1616|20706|0.078	0.044	.
chr11	24073611	24087688	UMR_3787|477|477|1478|36631|0.040	0.004	.
chr11	30261670	30269549	UMR_3806|204|204|814|12493|0.065	0	.
chr11	31869959	31878827	UMR_3820|143|143|242|11880|0.020	0.005	.
chr11	33195583	33206331	UMR_3853|512|512|1135|33918|0.033	0.013	.
chr11	40690211	40695290	UMR_3894|142|142|341|13013|0.026	0.003	.
chr11	42419173	42426042	UMR_3900|106|106|394|8283|0.048	0.006	.
chr11	48852765	48859571	UMR_3960|214|214|232|22456|0.010	0.004	.
chr11	53518839	53524962	UMR_4076|170|170|716|9797|0.073	0.012	.
chr11	58953083	58958160	UMR_4167|151|151|138|11826|0.012	0.004	.
chr11	63919293	63925802	UMR_4292|385|385|770|25084|0.031	0.009	.
chr11	67595639	67605810	UMR_4330|100|100|765|9483|0.081	0.045	.
chr11	69058648	69064502	UMR_4370|275|275|230|19021|0.012	0	.
chr11	69086137	69091284	UMR_4374|136|136|445|8069|0.055	0.01	.
chr11	69094489	69100604	UMR_4375|186|186|134|13913|0.010	0.004	.
chr11	69119858	69126468	UMR_4378|278|278|653|19907|0.033	0.005	.
chr11	69364041	69372883	UMR_4392|291|291|943|18156|0.052	0.006	.
chr11	69408309	69420852	UMR_4396|424|424|563|26192|0.021	0.005	.
chr11	69833944	69839333	UMR_4418|212|212|147|10388|0.014	0.006	.
chr11	70017716	70024676	UMR_4432|140|140|349|10005|0.035	0.007	.
chr11	73018387	73023853	UMR_4505|145|145|726|8260|0.088	0.007	.
chr11	75168180	75174544	UMR_4539|379|379|252|19394|0.013	0.004	.
chr11	75732235	75737825	UMR_4562|156|157|509|9379|0.054	0.007	.
chr11	77867680	77873273	UMR_4630|69|69|844|6137|0.138	0.052	.
chr11	77979893	77985744	UMR_4634|255|255|519|13283|0.039	0	.
chr11	80476119	80486030	UMR_4712|348|348|653|20881|0.031	0.012	.
chr11	83849455	83856082	UMR_4773|244|244|978|20217|0.048	0.024	.
chr11	84515218	84530656	UMR_4781|495|495|1285|38756|0.033	0.017	.
chr11	85829182	85839103	UMR_4808|486|486|1319|28374|0.046	0.023	.
chr11	85885917	85895556	UMR_4811|276|276|1347|20861|0.065	0.033	.
chr11	87759611	87765046	UMR_4857|155|155|64|9132|0.007	0.004	.
chr11	89298245	89303896	UMR_4902|330|330|279|16347|0.017	0.005	.
chr11	93096928	93102112	UMR_4923|187|187|218|12675|0.017	0.004	.
chr11	94208807	94214020	UMR_4936|233|233|304|12965|0.023	0	.
chr11	94468591	94474999	UMR_4947|196|196|480|9526|0.050	0.006	.
chr11	94988643	94994822	UMR_4967|262|262|459|12420|0.037	0	.
chr11	96168694	96206162	UMR_5023|643|643|3798|59563|0.064	0.029	.
chr11	96250569	96305260	UMR_5026|1557|1558|4502|116469|0.039	0.02	.
chr11	96306837	96330592	UMR_5027|525|525|2213|44777|0.049	0.028	.
chr11	96336793	96350042	UMR_5029|330|330|772|21334|0.036	0.019	.
chr11	97566415	97576022	UMR_5098|272|272|784|13364|0.059	0.014	.
chr11	97659551	97664994	UMR_5106|303|303|403|15882|0.025	0.008	.
chr11	97798265	97803628	UMR_5117|185|185|434|11472|0.038	0.007	.
chr11	98018203	98023390	UMR_5127|145|150|185|6906|0.027	0	.
chr11	98323031	98330528	UMR_5146|334|335|433|19496|0.022	0.007	.
chr11	98739839	98752375	UMR_5171|276|277|554|15797|0.035	0.008	.
chr11	98770089	98776273	UMR_5174|166|167|464|11694|0.040	0.008	.
chr11	101258997	101266064	UMR_5270|218|220|1195|14167|0.084	0.048	.
chr11	102315629	102321126	UMR_5337|427|427|395|19181|0.021	0.006	.
chr11	103358989	103365469	UMR_5402|283|283|883|16420|0.054	0.017	.
chr11	104229715	104237520	UMR_5426|288|288|586|17923|0.033	0.004	.
chr11	104438096	104443466	UMR_5430|205|205|129|11870|0.011	0.002	.
chr11	106784427	106790312	UMR_5483|241|241|286|14650|0.020	0	.
chr11	112779715	112785666	UMR_5574|306|306|782|21311|0.037	0.007	.
chr11	117114223	117121518	UMR_5785|235|235|1392|16859|0.083	0.015	.
chr11	117653273	117659656	UMR_5812|311|311|1013|17632|0.057	0.01	.
chr11	119039977	119058971	UMR_5874|753|753|2238|45720|0.049	0.011	.
chr11	119083576	119091650	UMR_5875|431|431|618|21706|0.028	0.009	.
chr11	119939523	119945797	UMR_5904|213|213|285|12357|0.023	0.006	.
chr11	120229873	120241964	UMR_5918|656|656|979|43259|0.023	0.004	.
chr12	5372709	5378330	UMR_6023|246|246|267|12487|0.021	0	.
chr12	9569801	9576776	UMR_6044|163|163|1343|13944|0.096	0.088	.
chr12	11432793	11438158	UMR_6053|121|121|313|11579|0.027	0.005	.
chr12	12261194	12266895	UMR_6055|97|97|421|6874|0.061	0.007	.
chr12	12937549	12943108	UMR_6067|256|256|324|17304|0.019	0.004	.
chr12	25092175	25101235	UMR_6151|375|375|591|27974|0.021	0.004	.
chr12	27337417	27344022	UMR_6168|404|404|308|23707|0.013	0	.
chr12	29526030	29539808	UMR_6191|190|190|261|19602|0.013	0.005	.
chr12	29694761	29700044	UMR_6192|53|53|805|6075|0.133	0.086	.
chr12	31709209	31714564	UMR_6215|38|38|189|5730|0.033	0.015	.
chr12	33953086	33969163	UMR_6246|446|446|1983|32574|0.061	0.023	.
chr12	49373731	49402868	UMR_6286|711|711|738|56752|0.013	0.005	.
chr12	55155563	55239306	UMR_6344|28|797|2|1051|0.002	0	.
chr12	56519219	56524829	UMR_6361|142|142|880|11529|0.076	0.018	.
chr12	56525414	56541572	UMR_6362|464|464|1355|33266|0.041	0.015	.
chr12	56611177	56616928	UMR_6363|180|180|662|11472|0.058	0.019	.
chr12	56685676	56701838	UMR_6366|460|460|1422|39301|0.036	0.02	.
chr12	57534207	57551113	UMR_6371|639|639|1497|48455|0.031	0.019	.
chr12	61521263	61529122	UMR_6390|174|174|253|12518|0.020	0	.
chr12	70107966	70113882	UMR_6431|201|201|899|11723|0.077	0.008	.
chr12	70339529	70348916	UMR_6438|213|213|700|16817|0.042	0.007	.
chr12	72936311	72942538	UMR_6498|192|192|711|15245|0.047	0.021	.
chr12	73034704	73055891	UMR_6501|638|638|1486|49157|0.030	0.017	.
chr12	80109060	80116388	UMR_6603|357|366|616|22361|0.028	0.008	.
chr12	86878765	86885794	UMR_6757|333|338|274|14902|0.018	0	.
chr12	86891047	86898560	UMR_6759|159|159|380|13190|0.029	0.007	.
chr12	95690656	95700408	UMR_6799|249|249|550|19492|0.028	0.004	.
chr12	100198661	100206212	UMR_6851|255|255|736|15734|0.047	0.006	.
chr12	104471469	104478821	UMR_6929|339|339|916|23251|0.039	0.018	.
chr12	108001373	108006664	UMR_7002|320|320|922|19400|0.048	0.007	.
chr12	110278541	110284108	UMR_7055|255|255|915|16419|0.056	0.027	.
chr12	110599577	110605388	UMR_7066|163|163|451|11568|0.039	0.004	.
chr12	118846226	118851292	UMR_7216|304|304|697|18562|0.038	0.01	.
chr13	5860519	5867072	UMR_7231|169|169|445|14359|0.031	0.004	.
chr13	14516991	14523826	UMR_7284|98|98|291|8243|0.035	0.005	.
chr13	21778652	21784581	UMR_7349|160|171|884|15373|0.058	0.004	.
chr13	21805498	21813222	UMR_7352|66|263|3|1322|0.002	0	.
chr13	21993865	21999377	UMR_7366|120|120|618|13757|0.045	0.025	.
chr13	23529894	23536674	UMR_7401|202|245|421|17588|0.024	0	.
chr13	23570039	23576324	UMR_7406|167|258|329|10660|0.031	0	.
chr13	23581160	23587164	UMR_7407|135|139|237|11060|0.021	0	.
chr13	24799550	24805741	UMR_7431|208|208|442|15314|0.029	0.004	.
chr13	28415161	28420613	UMR_7442|84|84|185|8700|0.021	0.006	.
chr13	28947953	28954468	UMR_7448|303|303|268|21185|0.013	0	.
chr13	31612855	31632748	UMR_7478|606|606|2046|42775|0.048	0.015	.
chr13	34128964	34134730	UMR_7493|160|160|827|13056|0.063	0.017	.
chr13	36729717	36737001	UMR_7520|244|244|685|19642|0.035	0.009	.
chr13	40701653	40717342	UMR_7555|353|353|2408|31474|0.077	0.036	.
chr13	40722528	40736074	UMR_7556|535|535|1703|40022|0.043	0.015	.
chr13	40737448	40742632	UMR_7557|169|169|474|12182|0.039	0.021	.
chr13	42048578	42053846	UMR_7583|281|281|300|16182|0.019	0.008	.
chr13	42680341	42686230	UMR_7588|64|64|220|7332|0.030	0.009	.
chr13	43299283	43305042	UMR_7599|222|222|470|13174|0.036	0.004	.
chr13	44729473	44734788	UMR_7636|313|313|235|18406|0.013	0.003	.
chr13	45960155	45967116	UMR_7657|296|296|586|17095|0.034	0.005	.
chr13	48653670	48663868	UMR_7724|292|292|1787|20742|0.086	0.028	.
chr13	48664215	48673022	UMR_7725|248|248|868|16540|0.052	0.021	.
chr13	51564683	51570567	UMR_7768|210|210|624|15199|0.041	0.006	.
chr13	51844609	51849944	UMR_7779|249|249|236|16736|0.014	0.004	.
chr13	52977880	52983270	UMR_7819|339|339|238|20152|0.012	0.003	.
chr13	53461841	53467062	UMR_7836|179|179|605|14507|0.042	0.023	.
chr13	54754121	54761157	UMR_7876|145|145|713|10970|0.065	0.011	.
chr13	55468671	55475827	UMR_7913|279|279|571|16393|0.035	0.008	.
chr13	55482583	55488493	UMR_7915|183|183|151|8961|0.017	0.005	.
chr13	55824386	55838091	UMR_7932|537|539|1169|32135|0.036	0.017	.
chr13	58806175	58813380	UMR_8004|237|237|370|16474|0.022	0	.
chr13	63562651	63569122	UMR_8066|396|396|303|24956|0.012	0.004	.
chr13	69734934	69741229	UMR_8130|279|279|423|15840|0.027	0.007	.
chr13	71956547	71968888	UMR_8156|450|450|1250|30814|0.041	0.02	.
chr13	72622963	72632261	UMR_8161|455|455|1198|27900|0.043	0.016	.
chr13	72633854	72640550	UMR_8162|143|143|727|12757|0.057	0.027	.
chr13	73260045	73272745	UMR_8165|477|477|1585|32009|0.050	0.025	.
chr13	78193799	78208342	UMR_8215|516|516|2439|33750|0.072	0.008	.
chr13	80881755	80888120	UMR_8219|243|243|472|19219|0.025	0.002	.
chr13	83522577	83543708	UMR_8234|204|204|1837|25055|0.073	0.016	.
chr13	83651377	83663584	UMR_8235|139|139|1878|17839|0.105	0.079	.
chr13	83713115	83747340	UMR_8236|750|750|1186|66817|0.018	0.004	.
chr13	84054634	84067650	UMR_8238|99|99|1213|12892|0.094	0.077	.
chr13	84343611	84350452	UMR_8240|165|165|693|16799|0.041	0.007	.
chr13	84748533	84764353	UMR_8241|110|110|1249|17460|0.072	0.049	.
chr13	93299281	93316104	UMR_8280|284|284|1731|25210|0.069	0.007	.
chr13	94868567	94886268	UMR_8305|658|658|1933|47887|0.040	0.016	.
chr13	96665147	96672169	UMR_8332|178|178|781|14983|0.052	0.006	.
chr13	97238996	97252618	UMR_8349|350|350|2923|26882|0.109	0.015	.
chr13	98351653	98368872	UMR_8362|585|585|2067|41852|0.049	0.021	.
chr13	98500719	98506694	UMR_8366|196|196|626|15522|0.040	0.023	.
chr13	99441761	99448520	UMR_8385|95|95|1113|9613|0.116	0.086	.
chr13	99498601	99505064	UMR_8391|82|82|430|8794|0.049	0.032	.
chr13	99510480	99517164	UMR_8393|192|192|331|13571|0.024	0.004	.
chr13	101689599	101696397	UMR_8421|133|133|378|12445|0.030	0.006	.
chr13	105048611	105055683	UMR_8454|156|156|600|12604|0.048	0.004	.
chr13	109925861	109933257	UMR_8499|83|83|969|10088|0.096	0.08	.
chr13	110394041	110401270	UMR_8506|232|232|1239|19044|0.065	0.007	.
chr13	116293403	116315056	UMR_8582|446|446|1509|42257|0.036	0.023	.
chr13	116705033	116712742	UMR_8583|188|188|747|18813|0.040	0.02	.
chr13	119688513	119694126	UMR_8603|108|108|427|8040|0.053	0.005	.
chr13	119961914	119968000	UMR_8608|81|210|49|1961|0.025	0.016	.
chr13	120022307	120039700	UMR_8610|205|565|311|10102|0.031	0.021	.
chr13	120092699	120100554	UMR_8612|91|244|936|4835|0.194	0.028	.
chr14	3571900	3652062	UMR_8616|36|536|186|486|0.383	0.081	.
chr14	3796127	3811238	UMR_8617|9|148|0|47|0.000	0	.
chr14	11552052	11557119	UMR_8667|268|268|229|18490|0.012	0.004	.
chr14	21982525	21991856	UMR_8751|508|508|1714|31432|0.055	0.017	.
chr14	24000803	24005858	UMR_8758|216|216|158|10161|0.016	0	.
chr14	25456641	25461782	UMR_8783|332|332|186|18878|0.010	0	.
chr14	39467427	39475420	UMR_8943|258|258|404|13779|0.029	0.008	.
chr14	46385433	46390731	UMR_8973|257|257|639|17413|0.037	0.012	.
chr14	46880999	46886105	UMR_8982|287|287|730|16018|0.046	0.007	.
chr14	48661479	48674648	UMR_9019|414|414|1290|36311|0.036	0.023	.
chr14	55107601	55112684	UMR_9117|66|66|496|5121|0.097	0.097	.
chr14	58069859	58077143	UMR_9193|380|381|158|22882|0.007	0	.
chr14	60377603	60382984	UMR_9206|195|195|765|12168|0.063	0.005	.
chr14	63239639	63256862	UMR_9272|510|510|1871|37189|0.050	0.02	.
chr14	63260872	63271334	UMR_9273|207|207|1106|19672|0.056	0.025	.
chr14	64580948	64595878	UMR_9306|366|366|1063|29414|0.036	0.009	.
chr14	66343628	66349602	UMR_9343|71|71|456|7074|0.064	0.026	.
chr14	66862929	66869888	UMR_9346|205|205|611|15119|0.040	0.004	.
chr14	67228637	67239216	UMR_9362|413|413|1351|32612|0.041	0.024	.
chr14	68121864	68127729	UMR_9375|236|236|667|15696|0.042	0.006	.
chr14	69169069	69175398	UMR_9378|162|162|717|12822|0.056	0.022	.
chr14	70074329	70080732	UMR_9400|435|435|1088|21366|0.051	0.008	.
chr14	70622231	70629778	UMR_9427|147|147|222|10418|0.021	0.007	.
chr14	84442409	84449732	UMR_9546|332|332|460|22179|0.021	0.005	.
chr14	93886803	93892022	UMR_9560|128|128|419|11538|0.036	0.004	.
chr14	100281709	100287356	UMR_9582|210|210|346|14342|0.024	0.004	.
chr14	101837959	101844137	UMR_9596|94|94|873|10154|0.086	0.031	.
chr14	103648463	103654140	UMR_9615|171|171|814|10490|0.078	0.003	.
chr14	104456547	104466252	UMR_9624|252|252|610|24688|0.025	0.015	.
chr14	104466585	104474093	UMR_9625|327|327|1038|21593|0.048	0.024	.
chr14	105892115	105899382	UMR_9644|354|354|633|23348|0.027	0.005	.
chr14	108908801	108915011	UMR_9646|148|148|175|13782|0.013	0.004	.
chr14	111672464	111679094	UMR_9647|215|215|499|14875|0.034	0.003	.
chr14	118225763	118239877	UMR_9675|529|529|1988|36524|0.054	0.017	.
chr14	120473815	120480578	UMR_9725|248|248|1112|14393|0.077	0.008	.
chr14	122473224	122481442	UMR_9767|424|424|1236|26755|0.046	0.013	.
chr15	8442053	8447352	UMR_9812|265|265|253|17873|0.014	0.003	.
chr15	25405781	25418470	UMR_9881|289|289|1147|21546|0.053	0.005	.
chr15	35292673	35303644	UMR_9955|394|394|987|31769|0.031	0.021	.
chr15	36775485	36795400	UMR_9982|359|362|958|24852|0.039	0.009	.
chr15	38297305	38302690	UMR_10005|313|313|796|13333|0.060	0	.
chr15	44744033	44755082	UMR_10054|140|140|798|12338|0.065	0.01	.
chr15	45109523	45116744	UMR_10058|92|92|360|7934|0.045	0.006	.
chr15	53341586	53347496	UMR_10072|225|225|231|14929|0.015	0.004	.
chr15	61983078	61989364	UMR_10154|291|291|178|19873|0.009	0	.
chr15	64917751	64923736	UMR_10173|218|218|564|13323|0.042	0.006	.
chr15	68928713	68935292	UMR_10188|129|129|714|11814|0.060	0.027	.
chr15	72544699	72549868	UMR_10195|257|258|302|12848|0.024	0.005	.
chr15	73182122	73187188	UMR_10209|251|251|891|13102|0.068	0.02	.
chr15	76517508	76524563	UMR_10316|416|416|413|18196|0.023	0.004	.
chr15	78116408	78121993	UMR_10377|179|179|461|12686|0.036	0.007	.
chr15	78709607	78720404	UMR_10401|307|307|716|17694|0.040	0.009	.
chr15	80009453	80016029	UMR_10476|302|302|549|14250|0.039	0.006	.
chr15	81855399	81861116	UMR_10524|210|210|196|15552|0.013	0	.
chr15	83779898	83785688	UMR_10594|162|162|1282|11289|0.114	0.104	.
chr15	85666163	85683234	UMR_10653|497|497|2264|32598|0.069	0.013	.
chr15	93591303	93596907	UMR_10774|203|203|733|13424|0.055	0.011	.
chr15	95523845	95529302	UMR_10795|184|184|476|13230|0.036	0.005	.
chr15	98631259	98637640	UMR_10885|230|230|359|11925|0.030	0.008	.
chr15	98803499	98809744	UMR_10902|266|266|559|14943|0.037	0.006	.
chr15	98867341	98873652	UMR_10906|201|201|543|11072|0.049	0.008	.
chr15	98948601	98956316	UMR_10915|130|143|329|11310|0.029	0.006	.
chr15	102909301	102922468	UMR_11101|303|303|824|22086|0.037	0.018	.
chr15	102923892	102929041	UMR_11102|69|69|321|6325|0.051	0.023	.
chr15	102931436	102977795	UMR_11103|1122|1122|4617|85922|0.054	0.023	.
chr15	102979031	103001334	UMR_11104|514|514|1460|40120|0.036	0.018	.
chr15	103002253	103015762	UMR_11105|323|323|1389|25734|0.054	0.029	.
chr15	103020763	103036772	UMR_11106|255|257|1325|22554|0.059	0.028	.
chr16	8828858	8834713	UMR_11205|236|236|912|13277|0.069	0.004	.
chr16	13357171	13368130	UMR_11249|87|87|608|10122|0.060	0.019	.
chr16	18127075	18132220	UMR_11325|192|192|485|9017|0.054	0.014	.
chr16	18625417	18630457	UMR_11347|222|222|487|9628|0.051	0.007	.
chr16	20692229	20697846	UMR_11374|148|148|337|9911|0.034	0.006	.
chr16	23106648	23114676	UMR_11424|194|195|1200|17771|0.068	0.006	.
chr16	23982047	23990006	UMR_11438|314|314|531|24054|0.022	0.004	.
chr16	30062661	30067855	UMR_11490|322|322|424|18145|0.023	0.005	.
chr16	31753805	31760010	UMR_11527|50|50|535|6763|0.079	0.027	.
chr16	34258435	34263588	UMR_11596|66|66|486|6674|0.073	0.039	.
chr16	38087063	38095856	UMR_11656|262|262|530|19347|0.027	0.003	.
chr16	46494091	46499120	UMR_11720|241|241|614|14743|0.042	0.009	.
chr16	52449755	52454967	UMR_11743|182|182|165|13566|0.012	0.003	.
chr16	67616245	67621994	UMR_11810|183|183|333|13117|0.025	0.005	.
chr16	77417761	77423470	UMR_11840|58|58|900|7960|0.113	0.076	.
chr16	85168820	85174350	UMR_11867|212|212|471|13471|0.035	0.006	.
chr16	91219435	91229238	UMR_11947|453|453|1048|30527|0.034	0.018	.
chr16	92693835	92700408	UMR_12003|291|291|1062|21079|0.050	0.011	.
chr16	94077751	94089389	UMR_12036|463|463|1071|31075|0.034	0.014	.
chr16	94092089	94098332	UMR_12037|175|175|716|16412|0.044	0.023	.
chr16	94369403	94375282	UMR_12054|192|192|297|10777|0.028	0	.
chr17	4994809	5000384	UMR_12134|286|286|738|14568|0.051	0.009	.
chr17	6316037	6322734	UMR_12169|79|191|177|3103|0.057	0.005	.
chr17	15037574	15044732	UMR_12292|29|137|7|530|0.013	0	.
chr17	23533201	23538986	UMR_12347|87|132|575|6240|0.092	0.045	.
chr17	23802695	23807984	UMR_12373|195|195|470|11244|0.042	0.006	.
chr17	24719233	24724610	UMR_12418|194|197|714|12253|0.058	0.003	.
chr17	26835659	26851414	UMR_12517|511|511|1434|38903|0.037	0.018	.
chr17	26945809	26954479	UMR_12526|261|261|308|13924|0.022	0.009	.
chr17	28688379	28694148	UMR_12623|223|223|515|12499|0.041	0	.
chr17	34116205	34123998	UMR_12791|428|428|181|20307|0.009	0	.
chr17	34626563	34633230	UMR_12808|262|262|386|15536|0.025	0.007	.
chr17	35833181	35839360	UMR_12879|182|182|920|14180|0.065	0.007	.
chr17	37044798	37052594	UMR_12920|277|277|492|16121|0.031	0.007	.
chr17	47138987	47144908	UMR_13050|215|215|572|14530|0.039	0.005	.
chr17	55444747	55450192	UMR_13137|135|135|740|9902|0.075	0.006	.
chr17	62879411	62884678	UMR_13227|366|366|248|20871|0.012	0	.
chr17	66445532	66451688	UMR_13276|311|311|459|17141|0.027	0.004	.
chr17	70520985	70526291	UMR_13328|42|42|552|5372|0.103	0.103	.
chr17	70847197	70853738	UMR_13331|274|274|431|20483|0.021	0.005	.
chr17	80941529	80947408	UMR_13452|170|173|1052|11517|0.091	0.009	.
chr17	85612115	85625796	UMR_13521|549|549|1408|35986|0.039	0.018	.
chr17	85679457	85693380	UMR_13526|554|554|1683|36048|0.047	0.024	.
chr17	86166277	86171332	UMR_13534|268|268|294|14374|0.020	0.005	.
chr17	87435605	87448000	UMR_13578|282|282|877|20407|0.043	0.007	.
chr17	90450967	90457107	UMR_13622|136|136|448|10968|0.041	0.008	.
chr17	93198977	93204304	UMR_13624|171|171|316|14570|0.022	0.007	.
chr18	6512631	6517640	UMR_13651|104|104|167|9969|0.017	0.003	.
chr18	7000959	7006553	UMR_13653|244|244|627|17993|0.035	0.005	.
chr18	11047091	11061187	UMR_13670|486|486|1320|36210|0.036	0.015	.
chr18	12858402	12863948	UMR_13693|91|91|191|6139|0.031	0.008	.
chr18	15059523	15066440	UMR_13716|334|334|1374|20672|0.066	0.01	.
chr18	16804975	16810609	UMR_13724|275|275|383|15739|0.024	0.002	.
chr18	23035753	23042934	UMR_13744|198|198|283|12765|0.022	0	.
chr18	23803239	23808604	UMR_13747|127|127|798|11220|0.071	0.007	.
chr18	25749177	25758646	UMR_13776|235|236|674|17086|0.039	0.005	.
chr18	31444088	31449499	UMR_13784|58|58|238|7276|0.033	0.006	.
chr18	33460133	33465368	UMR_13806|149|149|358|10279|0.035	0.007	.
chr18	35209867	35216202	UMR_13848|74|74|182|9340|0.019	0.014	.
chr18	36280043	36289789	UMR_13884|381|381|1210|20696|0.058	0.006	.
chr18	37818849	37826670	UMR_13914|160|160|1201|11913|0.101	0.075	.
chr18	38208285	38215408	UMR_13948|265|265|312|14737|0.021	0.005	.
chr18	39484261	39491944	UMR_13978|351|351|1091|19751|0.055	0.008	.
chr18	40255365	40261722	UMR_13981|98|98|851|9599|0.089	0.023	.
chr18	42394025	42402736	UMR_13990|315|315|1089|24088|0.045	0.019	.
chr18	47365841	47371465	UMR_14037|239|239|270|17403|0.016	0.004	.
chr18	53460376	53474133	UMR_14065|475|476|1477|33967|0.043	0.017	.
chr18	54985481	54993462	UMR_14082|180|180|662|17645|0.038	0.007	.
chr18	60619286	60625822	UMR_14135|152|152|436|10413|0.042	0.01	.
chr18	60924708	60931348	UMR_14160|98|99|351|6342|0.055	0.038	.
chr18	61554298	61560039	UMR_14185|183|184|779|14127|0.055	0	.
chr18	64330747	64343506	UMR_14222|450|450|1122|33181|0.034	0.021	.
chr18	65021759	65027112	UMR_14231|74|74|808|7915|0.102	0.059	.
chr18	65578795	65585048	UMR_14243|203|203|950|12660|0.075	0.031	.
chr18	65934636	65940284	UMR_14255|221|221|1479|16005|0.092	0.02	.
chr18	69343945	69351790	UMR_14307|217|217|840|17351|0.048	0.011	.
chr18	69515933	69526532	UMR_14312|190|190|1961|21307|0.092	0.065	.
chr18	69574539	69580080	UMR_14313|83|83|1116|10251|0.109	0.049	.
chr18	69590230	69602534	UMR_14314|195|195|1455|22152|0.066	0.02	.
chr18	72346491	72351646	UMR_14336|125|125|571|11311|0.050	0.006	.
chr18	75366125	75372014	UMR_14387|354|354|275|17315|0.016	0.006	.
chr18	76843749	76861311	UMR_14422|555|555|1689|37217|0.045	0.018	.
chr18	77560199	77566198	UMR_14442|233|233|919|15497|0.059	0.011	.
chr18	80983946	80991190	UMR_14502|405|405|1050|24762|0.042	0.018	.
chr18	82909388	82915365	UMR_14541|365|366|346|21526|0.016	0.004	.
chr18	84085752	84092276	UMR_14567|326|326|1341|21071|0.064	0.015	.
chr19	4988205	4994905	UMR_14656|154|154|633|10639|0.059	0.008	.
chr19	5093859	5099938	UMR_14668|156|156|201|8169|0.025	0.01	.
chr19	5455346	5461300	UMR_14679|190|190|396|12727|0.031	0.004	.
chr19	5487515	5492570	UMR_14682|225|225|204|16021|0.013	0	.
chr19	5792941	5804906	UMR_14707|213|213|166|19957|0.008	0.003	.
chr19	6496767	6504875	UMR_14748|237|237|158|12388|0.013	0.006	.
chr19	8661479	8667184	UMR_14800|105|105|272|7019|0.039	0.014	.
chr19	12003991	12014042	UMR_14871|280|280|971|28772|0.034	0.005	.
chr19	16870447	16879514	UMR_14898|383|383|1264|27415|0.046	0.017	.
chr19	23140118	23148020	UMR_14933|284|284|725|17807|0.041	0.007	.
chr19	24897027	24902460	UMR_14970|243|243|514|17893|0.029	0.011	.
chr19	25605271	25612209	UMR_14988|321|321|1022|20969|0.049	0.016	.
chr19	25670301	25676409	UMR_14993|232|232|1219|18871|0.065	0.019	.
chr19	29250068	29255900	UMR_15029|211|211|1015|13744|0.074	0.03	.
chr19	32754819	32763327	UMR_15075|293|293|364|19547|0.019	0.003	.
chr19	37171149	37178584	UMR_15109|181|181|147|14637|0.010	0.004	.
chr19	42253764	42259032	UMR_15209|118|118|920|7458|0.123	0.013	.
chr19	43598961	43611166	UMR_15239|322|322|853|25469|0.033	0.022	.
chr19	43611638	43617569	UMR_15240|308|308|716|17911|0.040	0.014	.
chr19	44293066	44304094	UMR_15259|222|225|874|18472|0.047	0.015	.
chr19	44745903	44761582	UMR_15287|559|559|939|36820|0.026	0.013	.
chr19	45074103	45082400	UMR_15299|335|335|1417|23149|0.061	0.015	.
chr19	45146163	45161655	UMR_15302|436|436|1316|31174|0.042	0.017	.
chr19	45220421	45244598	UMR_15307|818|818|1550|54424|0.028	0.015	.
chr19	46041173	46047016	UMR_15332|183|184|262|9631|0.027	0.007	.
chr19	46499277	46504930	UMR_15351|310|310|124|16776|0.007	0	.
chr19	47013475	47018756	UMR_15370|239|239|456|14148|0.032	0.005	.
chr19	55741357	55746862	UMR_15481|259|259|979|15464|0.063	0.015	.
chr19	56720559	56728447	UMR_15508|355|355|977|22097|0.044	0.01	.
chr19	59168586	59174140	UMR_15555|217|217|572|13587|0.042	0.017	.
chr19	59190327	59196524	UMR_15556|135|135|628|12113|0.052	0.037	.
chr2	6703353	6708376	UMR_15636|45|45|725|5454|0.133	0.09	.
chr2	6824973	6831336	UMR_15642|43|43|709|6486|0.109	0.095	.
chr2	6848265	6857522	UMR_15644|44|50|955|6148|0.155	0.14	.
chr2	6861192	6877658	UMR_15645|300|300|1461|26235|0.056	0.025	.
chr2	6879287	6886287	UMR_15646|61|61|304|7977|0.038	0.018	.
chr2	7388561	7396906	UMR_15652|77|77|552|10746|0.051	0.018	.
chr2	9874406	9898028	UMR_15656|688|688|2301|56965|0.040	0.023	.
chr2	10369211	10375688	UMR_15667|260|260|451|21322|0.021	0.008	.
chr2	18687929	18699617	UMR_15724|387|387|1700|26395|0.064	0.01	.
chr2	19444307	19450866	UMR_15737|226|226|1022|15076|0.068	0.014	.
chr2	19451249	19456616	UMR_15738|104|104|530|9699|0.055	0.024	.
chr2	19656709	19662217	UMR_15740|252|252|282|13676|0.021	0.006	.
chr2	22619395	22626066	UMR_15759|228|228|642|17951|0.036	0.015	.
chr2	25979307	25984476	UMR_15822|202|202|827|11209|0.074	0.015	.
chr2	28192596	28198854	UMR_15888|135|135|459|7677|0.060	0.009	.
chr2	28205911	28214822	UMR_15890|191|191|1407|14731|0.096	0.049	.
chr2	29963157	29973078	UMR_15944|211|211|955|14367|0.066	0.008	.
chr2	31635159	31642075	UMR_16023|367|367|647|21945|0.029	0.01	.
chr2	33638772	33647022	UMR_16115|424|424|1078|24819|0.043	0.029	.
chr2	45092541	45117981	UMR_16234|509|509|2358|45178|0.052	0.02	.
chr2	55435197	55440281	UMR_16275|106|106|149|8141|0.018	0	.
chr2	61801859	61816688	UMR_16331|502|502|805|33699|0.024	0.007	.
chr2	65929214	65935043	UMR_16356|57|57|599|8403|0.071	0.019	.
chr2	70471707	70477336	UMR_16394|331|331|615|19170|0.032	0.013	.
chr2	70557991	70569854	UMR_16396|448|448|1681|33550|0.050	0.017	.
chr2	71525941	71548530	UMR_16415|833|833|2543|60671|0.042	0.019	.
chr2	73263464	73281177	UMR_16453|687|688|1632|48115|0.034	0.014	.
chr2	73653292	73660628	UMR_16469|62|62|348|7540|0.046	0.011	.
chr2	74647641	74716320	UMR_16485|2263|2263|8819|166872|0.053	0.021	.
chr2	74719757	74741866	UMR_16486|519|519|1908|42340|0.045	0.023	.
chr2	74745997	74751400	UMR_16487|208|208|506|14500|0.035	0.017	.
chr2	83811335	83816449	UMR_16570|108|108|499|8630|0.058	0.005	.
chr2	84884936	84890424	UMR_16593|235|235|135|13554|0.010	0.004	.
chr2	92055118	92061598	UMR_16650|236|236|1309|19701|0.066	0.005	.
chr2	92429953	92435382	UMR_16662|167|167|243|11393|0.021	0.005	.
chr2	92599089	92605122	UMR_16673|169|169|742|8284|0.090	0.007	.
chr2	94240451	94247786	UMR_16712|248|248|107|16712|0.006	0.005	.
chr2	97465775	97475166	UMR_16722|110|110|551|12339|0.045	0.005	.
chr2	102657641	102663936	UMR_16744|168|168|627|11893|0.053	0.008	.
chr2	105120615	105135250	UMR_16777|480|480|1338|35259|0.038	0.02	.
chr2	109673365	109679211	UMR_16805|217|217|293|16023|0.018	0.005	.
chr2	116060343	116068463	UMR_16849|348|349|1000|23474|0.043	0.007	.
chr2	117121379	117126840	UMR_16857|127|127|726|11614|0.063	0.017	.
chr2	117336895	117343639	UMR_16866|145|145|1204|11528|0.104	0.011	.
chr2	121292139	121298510	UMR_16967|88|88|389|6507|0.060	0.005	.
chr2	128122349	128128523	UMR_17052|375|375|639|22002|0.029	0.007	.
chr2	129592181	129598355	UMR_17085|179|179|363|9217|0.039	0.012	.
chr2	131909349	131914819	UMR_17148|89|89|420|7944|0.053	0.005	.
chr2	136711168	136721494	UMR_17193|154|154|382|15508|0.025	0.009	.
chr2	143544775	143550742	UMR_17213|154|154|201|11188|0.018	0.003	.
chr2	144329285	144334626	UMR_17223|241|241|752|13751|0.055	0.011	.
chr2	146833061	146839990	UMR_17257|240|240|785|20763|0.038	0.021	.
chr2	147177757	147195751	UMR_17262|654|654|2021|45656|0.044	0.018	.
chr2	147359559	147375542	UMR_17264|379|385|970|29609|0.033	0.024	.
chr2	148028967	148050041	UMR_17266|566|566|1855|41534|0.045	0.021	.
chr2	156174648	156181614	UMR_17425|175|175|779|13834|0.056	0.005	.
chr2	156474863	156480460	UMR_17433|149|149|965|9038|0.107	0.057	.
chr2	156720281	156727207	UMR_17450|196|196|411|10692|0.038	0.005	.
chr2	158609049	158616958	UMR_17502|379|379|667|24172|0.028	0.016	.
chr2	160364253	160370914	UMR_17520|388|388|670|23083|0.029	0.012	.
chr2	163913661	163918786	UMR_17579|119|120|721|8606|0.084	0.037	.
chr2	165874517	165886971	UMR_17671|200|200|1126|17078|0.066	0.026	.
chr2	167060486	167067520	UMR_17713|177|177|486|11238|0.043	0.008	.
chr2	172546762	172554414	UMR_17897|371|371|1290|23065|0.056	0.015	.
chr2	175734692	175743756	UMR_17957|8|56|1|112|0.009	0.019	.
chr2	180889547	180898425	UMR_18050|371|371|432|20359|0.021	0.005	.
chr3	8509067	8514536	UMR_18098|112|112|256|10664|0.024	0.008	.
chr3	17782955	17802626	UMR_18174|359|359|1448|34189|0.042	0.007	.
chr3	30506139	30516159	UMR_18222|417|417|1463|29495|0.050	0.012	.
chr3	34638111	34643220	UMR_18268|161|161|1221|14581|0.084	0.038	.
chr3	34645508	34654440	UMR_18269|357|357|1324|28921|0.046	0.019	.
chr3	34660531	34666128	UMR_18270|219|219|1068|18332|0.058	0.028	.
chr3	45375677	45386833	UMR_18354|377|377|452|28740|0.016	0	.
chr3	55461234	55468282	UMR_18461|78|78|712|9238|0.077	0.031	.
chr3	58413931	58419562	UMR_18480|311|311|263|17547|0.015	0	.
chr3	61362665	61368296	UMR_18500|220|220|364|12878|0.028	0	.
chr3	66969941	66986517	UMR_18535|498|498|1628|41277|0.039	0.014	.
chr3	68570057	68581772	UMR_18544|153|153|1789|16024|0.112	0.061	.
chr3	73052251	73058696	UMR_18570|140|140|248|10794|0.023	0.004	.
chr3	80792160	80804304	UMR_18598|172|172|563|16439|0.034	0.003	.
chr3	84215267	84221475	UMR_18627|94|94|655|9451|0.069	0.019	.
chr3	84951191	84958500	UMR_18646|65|65|272|9034|0.030	0.012	.
chr3	87905765	87911152	UMR_18695|181|182|606|8687|0.070	0.009	.
chr3	88137855	88145844	UMR_18709|252|252|569|15450|0.037	0.004	.
chr3	88206170	88223005	UMR_18714|268|268|1240|18882|0.066	0.012	.
chr3	89391261	89397044	UMR_18784|239|239|203|13449|0.015	0.005	.
chr3	89959075	89964605	UMR_18809|180|180|616|11540|0.053	0.007	.
chr3	94477251	94483120	UMR_18849|89|89|316|5698|0.055	0.014	.
chr3	95225954	95231045	UMR_18869|144|144|253|8509|0.030	0.005	.
chr3	95992786	95998604	UMR_18896|181|181|303|9829|0.031	0.007	.
chr3	96382033	96389290	UMR_18919|8|146|62|379|0.164	0.087	.
chr3	96496934	96503712	UMR_18931|188|188|680|20013|0.034	0.003	.
chr3	96592986	96603290	UMR_18938|321|321|806|19589|0.041	0.003	.
chr3	99252315	99263602	UMR_18990|284|284|1604|24135|0.066	0.035	.
chr3	100681136	100686684	UMR_18995|224|224|396|14854|0.027	0.012	.
chr3	101599668	101605936	UMR_19012|185|185|396|11256|0.035	0	.
chr3	107035581	107042351	UMR_19091|197|197|701|13197|0.053	0.008	.
chr3	118428494	118436708	UMR_19208|171|171|381|15237|0.025	0.003	.
chr3	127158233	127164119	UMR_19286|112|112|319|11256|0.028	0.006	.
chr3	129194474	129227688	UMR_19308|980|980|2293|83685|0.027	0.018	.
chr3	131105847	131113120	UMR_19349|375|375|557|22615|0.025	0.01	.
chr3	133539542	133546246	UMR_19366|170|170|614|10646|0.058	0	.
chr3	134235400	134241518	UMR_19372|214|214|438|11989|0.037	0.007	.
chr3	137863469	137868952	UMR_19400|340|341|805|17155|0.047	0.013	.
chr3	138741599	138749888	UMR_19418|253|253|1394|19337|0.072	0.032	.
chr3	141462129	141467623	UMR_19423|168|168|783|12104|0.065	0.004	.
chr3	144196439	144206620	UMR_19441|368|368|1272|22488|0.057	0.007	.
chr3	145648201	145653808	UMR_19459|229|229|928|16578|0.056	0.015	.
chr3	154327045	154335182	UMR_19560|322|322|1084|26518|0.041	0.021	.
chr3	156559219	156565198	UMR_19571|179|179|116|13896|0.008	0.004	.
chr3	158555497	158563052	UMR_19581|143|143|181|9120|0.020	0.003	.
chr4	9843349	9850382	UMR_19629|213|214|759|14929|0.051	0.01	.
chr4	11384831	11389860	UMR_19641|234|234|484|14049|0.034	0.013	.
chr4	17851811	17859058	UMR_19675|91|91|214|7890|0.027	0.003	.
chr4	21673875	21691399	UMR_19684|570|570|2239|39078|0.057	0.016	.
chr4	22485927	22492118	UMR_19696|310|310|230|17049|0.013	0	.
chr4	42917294	42922743	UMR_19845|97|97|671|6752|0.099	0.058	.
chr4	42943129	42955042	UMR_19847|238|238|904|16812|0.054	0.013	.
chr4	44701333	44706362	UMR_19901|242|242|524|14747|0.036	0.008	.
chr4	44710380	44715818	UMR_19902|215|215|652|16670|0.039	0.022	.
chr4	46342111	46348521	UMR_19947|389|389|1188|20944|0.057	0.019	.
chr4	48041304	48048856	UMR_19979|390|390|563|23547|0.024	0.004	.
chr4	54944785	54950464	UMR_20027|201|201|226|13845|0.016	0.007	.
chr4	68947861	68956632	UMR_20143|127|127|627|11161|0.056	0.005	.
chr4	82496019	82507738	UMR_20166|380|380|2589|28945|0.089	0.012	.
chr4	86574907	86580638	UMR_20208|114|114|219|9511|0.023	0	.
chr4	88030865	88036137	UMR_20224|294|294|223|17844|0.012	0.004	.
chr4	89271349	89284405	UMR_20235|262|262|872|23798|0.037	0.021	.
chr4	89285883	89293001	UMR_20236|63|63|1141|8169|0.140	0.115	.
chr4	89298885	89311278	UMR_20238|196|196|1443|18015|0.080	0.032	.
chr4	97771751	97779662	UMR_20267|341|341|1153|21537|0.054	0.008	.
chr4	99650077	99663932	UMR_20284|680|681|1746|46851|0.037	0.019	.
chr4	102758927	102764308	UMR_20316|101|101|555|9249|0.060	0.006	.
chr4	109976100	109985946	UMR_20427|559|559|2038|33388|0.061	0.029	.
chr4	114899861	114915662	UMR_20445|539|539|1720|37322|0.046	0.014	.
chr4	115052003	115059808	UMR_20449|250|250|999|17873|0.056	0.02	.
chr4	115935057	115940872	UMR_20462|247|247|490|16816|0.029	0.015	.
chr4	119812109	119817440	UMR_20577|86|86|259|6380|0.041	0.01	.
chr4	122881073	122887236	UMR_20627|114|114|387|10066|0.038	0.005	.
chr4	123013249	123018966	UMR_20635|86|88|597|7793|0.077	0.012	.
chr4	127020698	127026624	UMR_20782|198|198|333|13406|0.025	0.001	.
chr4	127167451	127175502	UMR_20786|227|227|377|11226|0.034	0.021	.
chr4	133010223	133018172	UMR_20993|251|251|309|12738|0.024	0.005	.
chr4	133095377	133101926	UMR_21004|37|239|168|1630|0.103	0.024	.
chr4	134465881	134473366	UMR_21086|215|215|913|15929|0.057	0.008	.
chr4	135148451	135159046	UMR_21117|406|406|921|23470|0.039	0.022	.
chr4	138452893	138458404	UMR_21249|270|270|716|13589|0.053	0.016	.
chr4	139819552	139826450	UMR_21292|263|263|808|18655|0.043	0.017	.
chr4	139827607	139834107	UMR_21293|306|306|693|21516|0.032	0.014	.
chr4	141534107	141539446	UMR_21373|315|315|838|19927|0.042	0.01	.
chr4	142473902	142480928	UMR_21417|38|40|494|4021|0.123	0.105	.
chr4	149300828	149309055	UMR_21515|228|228|778|15814|0.049	0	.
chr4	155890637	155895762	UMR_21788|233|233|325|10866|0.030	0	.
chr5	15932775	15941897	UMR_21851|216|216|852|15275|0.056	0.005	.
chr5	23414231	23421017	UMR_21884|109|109|691|11469|0.060	0.012	.
chr5	23430301	23438720	UMR_21885|243|243|99|16839|0.006	0	.
chr5	28117265	28125842	UMR_21965|177|177|1194|16156|0.074	0.036	.
chr5	28157368	28176830	UMR_21966|605|605|2037|41633|0.049	0.017	.
chr5	29467767	29488375	UMR_21979|566|567|2072|44395|0.047	0.021	.
chr5	32132608	32137748	UMR_22040|332|332|241|17998|0.013	0	.
chr5	33018007	33028322	UMR_22055|212|225|584|14176|0.041	0.006	.
chr5	33430002	33436396	UMR_22063|433|433|431|22364|0.019	0.01	.
chr5	35379840	35401989	UMR_22110|689|691|1711|40761|0.042	0.015	.
chr5	36887393	36895958	UMR_22145|98|98|609|8189|0.074	0.038	.
chr5	37241078	37249482	UMR_22154|315|315|508|16959|0.030	0.004	.
chr5	37816981	37832824	UMR_22165|562|562|1540|42433|0.036	0.019	.
chr5	39639425	39645796	UMR_22188|142|142|876|11162|0.078	0.006	.
chr5	41751255	41757436	UMR_22190|111|111|640|10539|0.061	0.038	.
chr5	41758655	41768888	UMR_22191|388|388|1667|30818|0.054	0.022	.
chr5	43231847	43238790	UMR_22195|396|396|677|22568|0.030	0.008	.
chr5	57713815	57724332	UMR_22273|444|444|475|29654|0.016	0.003	.
chr5	63647881	63653192	UMR_22278|137|137|396|8306|0.048	0	.
chr5	67094055	67103468	UMR_22342|317|317|966|28353|0.034	0.02	.
chr5	67226855	67232742	UMR_22345|215|215|809|18568|0.044	0.025	.
chr5	75066869	75073679	UMR_22426|135|136|898|11652|0.077	0.037	.
chr5	75074957	75081264	UMR_22427|160|160|412|10490|0.039	0.018	.
chr5	75148419	75157464	UMR_22430|359|359|494|24449|0.020	0.013	.
chr5	81018975	81024320	UMR_22476|259|259|375|16162|0.023	0	.
chr5	88583058	88588892	UMR_22484|66|66|382|7803|0.049	0.016	.
chr5	98179558	98186886	UMR_22577|335|335|1626|21137|0.077	0.011	.
chr5	99973975	99980070	UMR_22601|250|250|364|15357|0.024	0.006	.
chr5	100035887	100041190	UMR_22603|276|276|282|15639|0.018	0	.
chr5	101654669	101669849	UMR_22637|558|558|1392|40662|0.034	0.016	.
chr5	104108471	104114466	UMR_22679|95|95|929|9879|0.094	0.081	.
chr5	106448135	106472995	UMR_22706|823|823|3184|63404|0.050	0.026	.
chr5	107719342	107727539	UMR_22731|372|372|809|22452|0.036	0.011	.
chr5	108365021	108371111	UMR_22743|289|289|444|15092|0.029	0.007	.
chr5	111415473	111427076	UMR_22802|554|554|1988|31414|0.063	0.014	.
chr5	112550517	112556115	UMR_22842|97|97|1339|7772|0.172	0.131	.
chr5	114566965	114572062	UMR_22938|233|236|213|11510|0.019	0	.
chr5	116588493	116593573	UMR_23037|160|160|176|11679|0.015	0.005	.
chr5	119656717	119677493	UMR_23131|540|540|1708|45499|0.038	0.025	.
chr5	119678782	119688580	UMR_23132|280|280|622|19826|0.031	0.017	.
chr5	119793397	119808734	UMR_23137|350|350|1661|28960|0.057	0.026	.
chr5	119829833	119845670	UMR_23138|385|385|1099|31685|0.035	0.021	.
chr5	120424169	120429272	UMR_23159|182|182|721|13270|0.054	0.024	.
chr5	120430481	120440314	UMR_23160|438|438|1289|27948|0.046	0.02	.
chr5	121003663	121010660	UMR_23180|118|118|708|8695|0.081	0.012	.
chr5	122494190	122503970	UMR_23238|298|298|530|18614|0.028	0.009	.
chr5	123130914	123145284	UMR_23269|532|532|637|33520|0.019	0.005	.
chr5	124182797	124188528	UMR_23318|97|97|208|7325|0.028	0.008	.
chr5	125388235	125394985	UMR_23375|194|194|705|13520|0.052	0.005	.
chr5	135930261	135935448	UMR_23577|130|130|298|9311|0.032	0.007	.
chr5	137027729	137033536	UMR_23611|321|321|320|18967|0.017	0.005	.
chr5	139535172	139558898	UMR_23696|921|921|1854|66120|0.028	0.016	.
chr5	142810556	142823934	UMR_23780|613|613|1044|41142|0.025	0.005	.
chr5	142901997	142907788	UMR_23788|211|211|427|12564|0.034	0.005	.
chr5	142959901	142964986	UMR_23791|238|238|116|12219|0.009	0	.
chr5	147185482	147193474	UMR_23905|357|357|758|25503|0.030	0.016	.
chr5	147266905	147278962	UMR_23908|280|280|1070|22896|0.047	0.023	.
chr5	147298803	147318338	UMR_23910|552|552|1710|40111|0.043	0.017	.
chr5	147721567	147727126	UMR_23918|229|229|1174|15940|0.074	0.012	.
chr5	149298467	149315316	UMR_23975|58|58|768|6332|0.121	0.064	.
chr6	6854061	6864946	UMR_24057|321|321|958|24078|0.040	0.019	.
chr6	6866838	6882627	UMR_24058|376|376|1622|30463|0.053	0.022	.
chr6	8508795	8514104	UMR_24067|230|230|357|11941|0.030	0.005	.
chr6	13832283	13840514	UMR_24081|128|128|601|13384|0.045	0.004	.
chr6	23243218	23254754	UMR_24125|381|381|1763|31027|0.057	0.021	.
chr6	30171623	30180079	UMR_24189|364|364|1222|22764|0.054	0.016	.
chr6	31214731	31222196	UMR_24220|295|295|579|18848|0.031	0.005	.
chr6	32583313	32588860	UMR_24232|201|201|136|10124|0.013	0.007	.
chr6	39870061	39876958	UMR_24318|239|239|615|15340|0.040	0	.
chr6	41604021	41610316	UMR_24328|130|130|591|8215|0.072	0	.
chr6	47680805	47740774	UMR_24349|43|416|96|894|0.107	0	.
chr6	49212883	49220558	UMR_24381|356|356|969|26208|0.037	0.01	.
chr6	51169944	51185754	UMR_24412|360|361|2519|42997|0.059	0.029	.
chr6	51466120	51473132	UMR_24422|300|300|482|19575|0.025	0.002	.
chr6	52156157	52222538	UMR_24433|1859|1869|6055|140152|0.043	0.02	.
chr6	52224307	52255348	UMR_24434|1033|1035|3035|77196|0.039	0.018	.
chr6	52260559	52271372	UMR_24436|244|246|808|17827|0.045	0.022	.
chr6	52309941	52323843	UMR_24440|407|408|919|30747|0.030	0.021	.
chr6	55676333	55684631	UMR_24498|116|124|565|11739|0.048	0.034	.
chr6	64727616	64735182	UMR_24531|254|254|624|21103|0.030	0.011	.
chr6	77241455	77249090	UMR_24613|184|184|499|13930|0.036	0	.
chr6	83437575	83443896	UMR_24661|132|133|396|8812|0.045	0.007	.
chr6	83695679	83722920	UMR_24668|516|519|2383|42351|0.056	0.023	.
chr6	84583264	84590732	UMR_24682|411|411|481|26352|0.018	0.008	.
chr6	86047871	86053793	UMR_24708|51|52|707|4999|0.141	0.101	.
chr6	86061919	86069531	UMR_24710|49|59|648|4829|0.134	0.072	.
chr6	86523103	86528246	UMR_24721|284|285|312|14586|0.021	0.003	.
chr6	86848215	86855353	UMR_24732|162|164|563|12764|0.044	0.005	.
chr6	88192987	88206297	UMR_24769|538|538|1164|32164|0.036	0.015	.
chr6	91683287	91689280	UMR_24832|136|137|586|7724|0.076	0.008	.
chr6	99518483	99526025	UMR_24905|316|316|1173|19983|0.059	0.005	.
chr6	110644509	110650664	UMR_24972|115|115|168|7634|0.022	0.003	.
chr6	113074822	113083876	UMR_24987|245|245|1503|15627|0.096	0.007	.
chr6	115122099	115127358	UMR_25044|37|37|881|4064|0.217	0.093	.
chr6	115672049	115677240	UMR_25053|151|151|478|9867|0.048	0	.
chr6	119104323	119109554	UMR_25109|254|258|380|12938|0.029	0.008	.
chr6	120488354	120494541	UMR_25144|256|256|562|13326|0.042	0.008	.
chr6	124859645	124865192	UMR_25217|147|147|698|8384|0.083	0.021	.
chr6	124914854	124920663	UMR_25219|240|240|630|14162|0.044	0.019	.
chr6	126161939	126167449	UMR_25264|187|190|1104|13314|0.083	0.019	.
chr6	127147357	127156110	UMR_25289|338|338|344|22273|0.015	0.006	.
chr6	127765651	127771278	UMR_25303|240|244|218|13249|0.016	0.002	.
chr6	136157146	136174548	UMR_25386|252|262|1139|22031|0.052	0.019	.
chr6	144202215	144210351	UMR_25487|139|139|1647|16422|0.100	0.076	.
chr7	4119090	4125890	UMR_25578|137|137|373|8715|0.043	0.012	.
chr7	16309006	16314686	UMR_25701|311|311|149|12797|0.012	0.007	.
chr7	16398903	16406099	UMR_25703|263|263|613|17443|0.035	0.005	.
chr7	16610548	16615960	UMR_25710|225|225|263|10738|0.024	0.004	.
chr7	16917909	16925103	UMR_25732|212|212|386|12149|0.032	0.009	.
chr7	25001649	25011408	UMR_25892|282|282|412|16446|0.025	0.007	.
chr7	25068617	25074472	UMR_25896|112|112|162|6419|0.025	0.007	.
chr7	25246169	25252511	UMR_25907|265|265|217|12472|0.017	0.005	.
chr7	25276813	25284199	UMR_25909|313|313|254|13491|0.019	0.004	.
chr7	27256823	27262138	UMR_25943|147|147|191|7344|0.026	0.006	.
chr7	28807646	28813257	UMR_26028|255|255|256|16721|0.015	0.005	.
chr7	29303382	29310642	UMR_26060|275|275|543|15059|0.036	0.005	.
chr7	29314865	29320524	UMR_26062|117|117|806|8186|0.098	0.043	.
chr7	36695219	36700878	UMR_26208|336|336|521|15208|0.034	0	.
chr7	44441293	44448050	UMR_26281|138|138|512|8404|0.061	0.012	.
chr7	44586519	44594663	UMR_26292|330|330|705|20168|0.035	0.008	.
chr7	45163401	45169667	UMR_26335|152|152|503|9647|0.052	0.014	.
chr7	46396042	46401498	UMR_26417|261|262|489|12686|0.039	0.008	.
chr7	49245342	49252032	UMR_26454|233|233|499|15168|0.033	0.005	.
chr7	49632081	49639896	UMR_26460|291|291|758|24366|0.031	0.024	.
chr7	49907093	49916142	UMR_26469|265|265|994|21112|0.047	0.028	.
chr7	63934767	63940122	UMR_26506|367|367|352|16436|0.021	0.003	.
chr7	64500722	64506222	UMR_26520|183|183|445|8660|0.051	0.008	.
chr7	67949849	67955058	UMR_26580|385|385|320|19246|0.017	0.005	.
chr7	70279121	70289101	UMR_26605|201|201|638|18260|0.035	0.024	.
chr7	70323635	70355657	UMR_26606|680|680|3820|58345|0.065	0.034	.
chr7	70361357	70371851	UMR_26608|313|313|932|24255|0.038	0.013	.
chr7	73536681	73542410	UMR_26624|99|99|150|11402|0.013	0.002	.
chr7	73551497	73559693	UMR_26626|195|195|136|16819|0.008	0.004	.
chr7	73614228	73619667	UMR_26632|179|179|616|15736|0.039	0.006	.
chr7	75264425	75272724	UMR_26642|50|51|1240|6195|0.200	0.134	.
chr7	75304401	75309603	UMR_26648|90|90|164|7705|0.021	0.006	.
chr7	79498345	79510556	UMR_26688|415|415|604|24744|0.024	0.004	.
chr7	79511307	79526534	UMR_26689|235|235|1747|17471|0.100	0.043	.
chr7	82864849	82871956	UMR_26789|398|398|271|21179|0.013	0.004	.
chr7	91088985	91096906	UMR_26835|74|74|640|9177|0.070	0.007	.
chr7	96209237	96215238	UMR_26846|259|259|372|15453|0.024	0.005	.
chr7	99266989	99275908	UMR_26897|228|228|855|14870|0.057	0.006	.
chr7	99962491	99969838	UMR_26921|71|71|1215|7893|0.154	0.131	.
chr7	105567979	105573460	UMR_27005|55|55|361|4597|0.079	0.013	.
chr7	118990189	118996622	UMR_27166|179|179|1218|11800|0.103	0.031	.
chr7	131539823	131557772	UMR_27402|702|702|1348|47558|0.028	0.014	.
chr7	131966005	131971157	UMR_27408|128|128|178|7137|0.025	0.004	.
chr7	137307103	137323612	UMR_27487|868|868|2105|54271|0.039	0.019	.
chr7	139581023	139586188	UMR_27515|339|339|1088|20309|0.054	0.022	.
chr7	142091299	142096548	UMR_27593|190|190|625|9879|0.063	0.012	.
chr7	142657515	142665010	UMR_27603|334|334|530|17298|0.031	0.013	.
chr7	144236741	144242620	UMR_27627|80|80|370|6862|0.054	0.033	.
chr7	144283439	144288698	UMR_27628|100|100|455|6569|0.069	0.021	.
chr7	144937485	144943890	UMR_27650|341|341|150|22520|0.007	0.004	.
chr8	8655201	8662700	UMR_27687|322|322|890|21028|0.042	0.007	.
chr8	12393803	12402317	UMR_27756|460|460|1111|26315|0.042	0.01	.
chr8	25195955	25202704	UMR_27915|230|230|1359|14369|0.095	0.025	.
chr8	46291147	46297028	UMR_28145|219|219|1007|18005|0.056	0.016	.
chr8	54953386	54965386	UMR_28202|66|66|553|10140|0.055	0.007	.
chr8	57311081	57316136	UMR_28209|95|95|548|9748|0.056	0.018	.
chr8	57318418	57350352	UMR_28210|791|791|2932|65589|0.045	0.024	.
chr8	67812132	67819120	UMR_28280|55|55|606|7221|0.084	0.024	.
chr8	69088282	69094540	UMR_28289|114|114|648|10091|0.064	0.007	.
chr8	70489287	70494947	UMR_28341|305|305|845|14404|0.059	0.016	.
chr8	71667313	71672790	UMR_28422|166|166|300|9477|0.032	0.007	.
chr8	71684169	71690386	UMR_28425|244|244|1085|15213|0.071	0.041	.
chr8	73350029	73356511	UMR_28448|223|223|136|13970|0.010	0	.
chr8	76898073	76903346	UMR_28457|259|259|231|13884|0.017	0	.
chr8	78431235	78439306	UMR_28478|273|273|1498|20309|0.074	0.013	.
chr8	83897119	83904325	UMR_28542|329|329|578|15521|0.037	0.011	.
chr8	84768633	84776192	UMR_28580|152|152|675|11435|0.059	0.027	.
chr8	84975393	84980551	UMR_28608|291|291|255|15326|0.017	0	.
chr8	89040529	89047762	UMR_28688|433|433|969|27023|0.036	0.01	.
chr8	90886211	90891923	UMR_28712|23|225|17|974|0.017	0	.
chr8	91799225	91807511	UMR_28730|448|448|790|27135|0.029	0.012	.
chr8	92354120	92367230	UMR_28739|667|667|1288|44165|0.029	0.012	.
chr8	93809708	93817002	UMR_28755|311|311|732|18472|0.040	0.008	.
chr8	94265445	94270508	UMR_28768|42|42|419|6299|0.067	0.054	.
chr8	94770957	94777935	UMR_28779|106|106|623|7575|0.082	0.011	.
chr8	102779721	102787257	UMR_28823|214|214|557|16423|0.034	0.006	.
chr8	106332537	106339062	UMR_28902|157|157|1166|11833|0.099	0.005	.
chr8	108695411	108705641	UMR_28954|372|372|1440|25124|0.057	0.018	.
chr8	117256105	117262237	UMR_29131|269|269|720|14055|0.051	0.025	.
chr8	121071381	121085298	UMR_29232|565|565|1132|32795|0.035	0.013	.
chr8	121086477	121091641	UMR_29233|135|135|449|11235|0.040	0.025	.
chr8	121113177	121129608	UMR_29236|676|676|1592|42896|0.037	0.014	.
chr8	123410527	123415572	UMR_29322|121|121|265|8668|0.031	0.007	.
chr8	123614909	123623799	UMR_29332|76|496|161|1843|0.087	0.01	.
chr8	124429156	124434228	UMR_29358|128|128|468|8225|0.057	0.009	.
chr8	126583367	126593498	UMR_29422|339|339|1220|21674|0.056	0.005	.
chr9	24769407	24781968	UMR_29625|338|338|1241|28137|0.044	0.019	.
chr9	27298201	27304124	UMR_29640|194|194|705|12816|0.055	0.005	.
chr9	35420591	35426430	UMR_29710|180|180|978|11029|0.089	0.009	.
chr9	37549403	37557588	UMR_29738|99|99|830|8959|0.093	0.009	.
chr9	40803437	40808520	UMR_29765|46|48|728|4915|0.148	0.093	.
chr9	40871202	40880056	UMR_29769|292|300|1026|23392|0.044	0.024	.
chr9	41577851	41590834	UMR_29782|161|168|1017|18416|0.055	0.012	.
chr9	44083214	44090034	UMR_29838|191|191|383|11709|0.033	0.005	.
chr9	44877858	44883863	UMR_29879|259|265|192|13509|0.014	0.004	.
chr9	51763487	51768542	UMR_29984|198|198|149|10500|0.014	0	.
chr9	52675641	52680912	UMR_29992|128|128|668|10188|0.066	0.008	.
chr9	55538687	55547062	UMR_30041|416|416|945|29047|0.033	0.018	.
chr9	56624535	56637991	UMR_30054|305|306|1063|17605|0.060	0.01	.
chr9	57071187	57077674	UMR_30068|353|353|162|21613|0.007	0	.
chr9	57761607	57766938	UMR_30092|232|232|307|12351|0.025	0	.
chr9	57938065	57943626	UMR_30099|172|172|354|7335|0.048	0	.
chr9	58194973	58204902	UMR_30108|371|371|1160|23995|0.048	0.015	.
chr9	59655577	59660662	UMR_30135|157|157|268|11981|0.022	0.006	.
chr9	61368603	61375226	UMR_30168|370|372|440|21862|0.020	0.007	.
chr9	62339600	62346532	UMR_30198|352|361|286|19829|0.014	0	.
chr9	63132219	63152048	UMR_30227|846|846|2102|56581|0.037	0.015	.
chr9	67041977	67050281	UMR_30320|266|266|1040|17842|0.058	0.008	.
chr9	69754266	69772780	UMR_30343|525|525|1364|45397|0.030	0.018	.
chr9	72529927	72535267	UMR_30383|182|182|640|10450|0.061	0.017	.
chr9	74846767	74858627	UMR_30405|342|342|979|28403|0.034	0.019	.
chr9	74860793	74868904	UMR_30406|333|333|1226|21704|0.056	0.014	.
chr9	75049719	75055918	UMR_30411|42|42|661|6068|0.109	0.1	.
chr9	75070607	75075957	UMR_30412|157|157|221|8382|0.026	0	.
chr9	78476639	78482678	UMR_30466|175|177|148|10451|0.014	0.003	.
chr9	87726855	87740992	UMR_30538|470|470|1764|39457|0.045	0.015	.
chr9	91360963	91368498	UMR_30564|323|323|1588|23399|0.068	0.02	.
chr9	91377394	91388333	UMR_30565|355|355|2392|28134|0.085	0.044	.
chr9	94534583	94539704	UMR_30575|279|279|480|14342|0.033	0	.
chr9	96728246	96734038	UMR_30604|104|104|626|13662|0.046	0.018	.
chr9	98951945	98965784	UMR_30632|522|522|1460|35319|0.041	0.014	.
chr9	99867629	99878564	UMR_30653|432|432|1067|31940|0.033	0.019	.
chr9	101072449	101078727	UMR_30663|289|289|268|18489|0.014	0.003	.
chr9	106367084	106372394	UMR_30742|255|255|342|13492|0.025	0.005	.
chr9	112091813	112097889	UMR_30917|30|33|570|3389|0.168	0.112	.
chr9	112099643	112109754	UMR_30918|82|82|1220|9660|0.126	0.095	.
chr9	112116092	112127119	UMR_30921|136|139|1616|14062|0.115	0.059	.
chr9	112127435	112136549	UMR_30922|83|83|1271|9013|0.141	0.147	.
chr9	112166773	112173235	UMR_30924|53|53|1143|6223|0.184	0.146	.
chr9	112174104	112238962	UMR_30925|716|723|4801|79421|0.060	0.021	.
chr9	119979397	119984398	UMR_31045|171|171|347|8388|0.041	0.005	.
chr9	123897910	123926536	UMR_31158|161|169|132|7800|0.017	0.008	.
chr9	124416344	124426122	UMR_31162|302|303|95|15274|0.006	0	.
chrX	7638025	7645894	UMR_31181|143|143|487|6180|0.079	0.01	.
chrX	12076563	12081896	UMR_31260|440|440|94|10975|0.009	0	.
chrX	12086781	12092200	UMR_31261|413|413|271|9650|0.028	0	.
chrX	13069887	13075060	UMR_31284|245|247|161|6964|0.023	0	.
chrX	13279783	13285070	UMR_31288|196|196|91|6049|0.015	0	.
chrX	13842481	13848071	UMR_31291|214|214|346|7521|0.046	0.011	.
chrX	20912926	20922536	UMR_31313|133|133|254|4622|0.055	0	.
chrX	41399903	41406472	UMR_31363|108|108|286|5327|0.054	0.009	.
chrX	42148471	42153606	UMR_31366|255|255|128|8564|0.015	0	.
chrX	43425577	43431409	UMR_31367|135|135|160|5775|0.028	0	.
chrX	48340819	48346221	UMR_31386|364|364|179|8379|0.021	0	.
chrX	57916779	57922720	UMR_31447|183|183|639|8993|0.071	0.056	.
chrX	58027557	58034091	UMR_31450|260|260|669|10346|0.065	0.016	.
chrX	60890565	60896660	UMR_31458|388|388|276|10936|0.025	0	.
chrX	64273349	64278575	UMR_31462|140|140|141|4897|0.029	0	.
chrX	66648452	66654140	UMR_31463|98|98|444|4461|0.100	0.01	.
chrX	71048664	71054301	UMR_31470|174|174|122|6373|0.019	0.007	.
chrX	71661463	71666731	UMR_31476|162|162|328|5915|0.055	0.015	.
chrX	73963379	73969596	UMR_31511|176|176|63|7001|0.009	0	.
chrX	74244573	74250546	UMR_31515|145|151|312|4526|0.069	0	.
chrX	85046643	85052753	UMR_31548|88|88|294|4596|0.064	0.015	.
chrX	88109126	88116780	UMR_31552|68|68|266|5094|0.052	0.01	.
chrX	93279553	93301936	UMR_31554|603|603|1147|25510|0.045	0.017	.
chrX	95160700	95167242	UMR_31579|79|79|139|4635|0.030	0.007	.
chrX	99134861	99139946	UMR_31595|187|187|126|6435|0.020	0	.
chrX	101298431	101305020	UMR_31622|121|121|256|4273|0.060	0.011	.
chrX	133685742	133692524	UMR_31713|323|323|191|9876|0.019	0	.
chrX	134294965	134300730	UMR_31720|66|66|241|3073|0.078	0	.
chrX	136030133	136035601	UMR_31748|29|84|195|1750|0.111	0.027	.
chrX	137098017	137128358	UMR_31767|543|672|1430|22351|0.064	0.026	.
chrX	141721409	141726888	UMR_31792|248|248|259|8547|0.030	0	.
chrX	152143759	152149948	UMR_31834|159|159|39|3873|0.010	0	.
chrX	153497109	153503038	UMR_31851|186|186|145|6932|0.021	0	.
chrX	155621181	155626656	UMR_31857|214|214|61|5813|0.010	0	.
chrX	158023134	158044412	UMR_31861|266|266|858|11385|0.075	0	.
chrX	158918653	158925808	UMR_31862|76|76|105|5138|0.020	0.007	.
chrX	160990101	160996332	UMR_31878|153|153|157|6556|0.024	0	.
chrX	162758469	162763516	UMR_31892|211|214|121|5894|0.021	0	.
chrX	166214153	166219822	UMR_31911|42|42|334|2497|0.134	0.11	.
chrX	166343646	166358008	UMR_31914|105|106|419|7695|0.054	0.024	.
chrX	168118383	168125180	UMR_31929|91|91|278|3841|0.072	0	.

## Sheet: P39 cKO, DMVs
chrom	start	end	name	score	strand
chr1	4489429	4498682	UMR_6|298|298|477|15419|0.031	0.005	.
chr1	5017820	5024949	UMR_17|239|239|205|11334|0.018	0	.
chr1	9296013	9301714	UMR_34|126|126|370|7477|0.049	0	.
chr1	13124093	13129470	UMR_71|173|173|401|9926|0.040	0.01	.
chr1	13370514	13375918	UMR_79|308|308|469|10779|0.044	0	.
chr1	19095949	19113510	UMR_129|266|266|589|21606|0.027	0.006	.
chr1	19205184	19243259	UMR_130|589|589|1114|49856|0.022	0.007	.
chr1	21957446	21963816	UMR_152|199|199|275|8042|0.034	0	.
chr1	22800215	22807474	UMR_157|128|128|542|5933|0.091	0.014	.
chr1	23761159	23766257	UMR_169|185|185|140|7318|0.019	0	.
chr1	25084493	25089573	UMR_207|54|54|493|5449|0.090	0.038	.
chr1	25823708	25830282	UMR_215|147|147|336|10416|0.032	0.011	.
chr1	32171263	32176652	UMR_225|97|97|368|6853|0.054	0.007	.
chr1	38435993	38442236	UMR_439|67|67|479|5973|0.080	0.028	.
chr1	38627638	38633546	UMR_455|117|117|522|7269|0.072	0.021	.
chr1	39191545	39197096	UMR_481|219|219|312|9515|0.033	0.004	.
chr1	41809391	41815489	UMR_581|64|64|426|6503|0.066	0.027	.
chr1	41887302	41892968	UMR_583|77|77|402|6850|0.059	0.032	.
chr1	42255634	42263368	UMR_592|105|105|834|9707|0.086	0.022	.
chr1	42538489	42544390	UMR_598|95|95|429|7215|0.059	0.012	.
chr1	42677279	42696920	UMR_602|455|455|427|26332|0.016	0	.
chr1	42697033	42715184	UMR_603|509|509|835|25018|0.033	0.008	.
chr1	46849227	46854772	UMR_655|198|198|262|7764|0.034	0	.
chr1	50923972	50930350	UMR_659|142|142|176|7894|0.022	0	.
chr1	52228257	52234454	UMR_704|191|191|413|7122|0.058	0	.
chr1	52721569	52728200	UMR_714|157|157|837|7718|0.108	0.008	.
chr1	55886203	55894232	UMR_768|108|108|961|9738|0.099	0.083	.
chr1	56898315	56904364	UMR_775|54|54|565|4610|0.123	0.127	.
chr1	56960381	56985228	UMR_781|635|635|1044|34531|0.030	0.005	.
chr1	59480535	59485898	UMR_855|299|299|356|12623|0.028	0.008	.
chr1	59762019	59767296	UMR_869|230|230|78|9229|0.008	0	.
chr1	62561961	62567458	UMR_917|57|57|600|5725|0.105	0.061	.
chr1	62701051	62711306	UMR_924|307|307|688|13797|0.050	0	.
chr1	64113811	64123049	UMR_993|192|192|202|11500|0.018	0	.
chr1	66320310	66326449	UMR_1037|43|43|55|3982|0.014	0.005	.
chr1	66385989	66391595	UMR_1041|40|40|347|4075|0.085	0.02	.
chr1	69684435	69689533	UMR_1059|170|171|425|8362|0.051	0.019	.
chr1	72532109	72538104	UMR_1105|127|127|333|7213|0.046	0.004	.
chr1	72869863	72876776	UMR_1119|206|206|107|12404|0.009	0	.
chr1	74235780	74241250	UMR_1133|161|161|170|7825|0.022	0	.
chr1	74768793	74777087	UMR_1149|210|210|438|9038|0.048	0.011	.
chr1	74786123	74808828	UMR_1151|452|452|962|18910|0.051	0.009	.
chr1	74853957	74860877	UMR_1156|302|302|166|11804|0.014	0	.
chr1	74880587	74888916	UMR_1157|265|265|180|12376|0.015	0	.
chr1	74890072	74895542	UMR_1158|119|119|366|5953|0.061	0.01	.
chr1	74896421	74902565	UMR_1159|131|131|262|5143|0.051	0.017	.
chr1	74947803	74952850	UMR_1161|279|279|295|9818|0.030	0.009	.
chr1	75442699	75451137	UMR_1194|179|179|236|7349|0.032	0.012	.
chr1	76427381	76434293	UMR_1236|41|41|563|3831|0.147	0.044	.
chr1	77406407	77413404	UMR_1250|83|83|736|7113|0.103	0.072	.
chr1	77493821	77498995	UMR_1258|53|53|305|4616|0.066	0.033	.
chr1	77500671	77517584	UMR_1259|377|377|1109|23661|0.047	0.007	.
chr1	77543684	77548806	UMR_1263|43|43|523|4568|0.114	0.055	.
chr1	78186955	78204630	UMR_1275|502|502|619|32416|0.019	0.008	.
chr1	78214073	78219853	UMR_1277|238|238|535|9644|0.055	0.008	.
chr1	81075973	81081113	UMR_1319|42|42|185|4151|0.045	0.011	.
chr1	82282491	82287537	UMR_1326|99|99|124|5895|0.021	0.013	.
chr1	85894013	85902808	UMR_1380|159|159|271|7737|0.035	0.007	.
chr1	86524461	86533777	UMR_1416|437|446|381|14908|0.026	0	.
chr1	87262405	87267838	UMR_1439|156|156|398|7714|0.052	0.005	.
chr1	88698791	88709368	UMR_1467|284|284|909|13941|0.065	0	.
chr1	89921081	89936932	UMR_1539|558|559|595|26990|0.022	0.006	.
chr1	90346659	90352020	UMR_1560|33|33|407|3234|0.126	0.128	.
chr1	97656801	97662786	UMR_1709|245|245|266|8471|0.031	0	.
chr1	98092352	98098422	UMR_1730|142|142|710|5893|0.120	0	.
chr1	106172285	106177399	UMR_1760|153|153|144|5631|0.026	0	.
chr1	119047331	119055030	UMR_1801|271|271|274|15502|0.018	0.005	.
chr1	119418624	119424572	UMR_1810|345|345|342|11973|0.029	0	.
chr1	120590336	120618075	UMR_1847|678|678|1032|38154|0.027	0.009	.
chr1	124041533	124047079	UMR_1866|133|133|352|6625|0.053	0	.
chr1	127204535	127209718	UMR_1891|149|149|294|6833|0.043	0	.
chr1	127933640	127938644	UMR_1912|40|40|412|3318|0.124	0.06	.
chr1	128101941	128107045	UMR_1923|125|125|249|6232|0.040	0	.
chr1	128590069	128596994	UMR_1935|202|202|232|12031|0.019	0	.
chr1	131519789	131529183	UMR_1973|263|263|168|11874|0.014	0	.
chr1	132387752	132393254	UMR_2029|157|157|339|6802|0.050	0.013	.
chr1	133044293	133050713	UMR_2086|172|172|559|6770|0.083	0	.
chr1	133129403	133134627	UMR_2092|179|179|557|8273|0.067	0.011	.
chr1	133178686	133184476	UMR_2096|113|113|349|5690|0.061	0.006	.
chr1	133796906	133802098	UMR_2133|80|80|250|4573|0.055	0.008	.
chr1	134400140	134406772	UMR_2187|61|135|140|2463|0.057	0	.
chr1	135579156	135586316	UMR_2247|195|195|346|9230|0.037	0.007	.
chr1	136126949	136141080	UMR_2293|248|248|633|10893|0.058	0.009	.
chr1	136228441	136235432	UMR_2297|155|155|390|7396|0.053	0.01	.
chr1	136944979	136954464	UMR_2332|254|254|237|15109|0.016	0.006	.
chr1	137897547	137907487	UMR_2341|107|107|453|10824|0.042	0.006	.
chr1	138835124	138850052	UMR_2361|369|369|640|22421|0.029	0.008	.
chr1	143639849	143648651	UMR_2376|66|66|603|7469|0.081	0.017	.
chr1	146493591	146499413	UMR_2385|93|93|313|7470|0.042	0	.
chr1	152084593	152091608	UMR_2442|208|209|474|9374|0.051	0	.
chr1	154721367	154727524	UMR_2539|128|128|337|7301|0.046	0.008	.
chr1	155082273	155087630	UMR_2560|157|157|454|7243|0.063	0.025	.
chr1	155727843	155744434	UMR_2601|451|451|468|23192|0.020	0.004	.
chr1	161033344	161041222	UMR_2737|144|144|128|7228|0.018	0	.
chr1	164452420	164462356	UMR_2782|275|275|692|13627|0.051	0	.
chr1	166277950	166285242	UMR_2849|81|81|313|5865|0.053	0.02	.
chr1	167687245	167696468	UMR_2902|300|300|548|15653|0.035	0.004	.
chr1	168286659	168292425	UMR_2933|88|88|745|5705|0.131	0.066	.
chr1	168379969	168387168	UMR_2947|91|91|526|6252|0.084	0.07	.
chr1	168416322	168421880	UMR_2952|67|67|342|5045|0.068	0.044	.
chr1	168422669	168432974	UMR_2953|173|173|109|14898|0.007	0.003	.
chr1	171032493	171039318	UMR_3014|185|185|370|16931|0.022	0.003	.
chr1	171070047	171081670	UMR_3017|81|662|346|3230|0.107	0.056	.
chr1	171246168	171252690	UMR_3031|131|131|582|6811|0.085	0.02	.
chr1	172024238	172029676	UMR_3054|142|142|145|7133|0.020	0.006	.
chr1	172200479	172207720	UMR_3063|115|115|46|6012|0.008	0.004	.
chr1	172309345	172315481	UMR_3071|151|151|275|6949|0.040	0.005	.
chr1	172481259	172487448	UMR_3085|139|139|511|7176|0.071	0.023	.
chr1	174499877	174505164	UMR_3109|143|143|257|6449|0.040	0	.
chr1	175689174	175694456	UMR_3121|154|154|595|8103|0.073	0.004	.
chr1	176928887	176935054	UMR_3142|81|81|385|7229|0.053	0.024	.
chr1	177253949	177259480	UMR_3160|224|224|159|5108|0.031	0	.
chr1	177442923	177463434	UMR_3178|304|304|1433|23132|0.062	0.028	.
chr1	178333329	178338828	UMR_3195|255|255|198|9959|0.020	0	.
chr1	184715376	184738790	UMR_3419|588|589|755|35651|0.021	0.007	.
chr1	187603443	187611048	UMR_3501|283|284|276|14463|0.019	0.005	.
chr1	190167719	190176380	UMR_3586|332|332|200|15710|0.013	0.008	.
chr1	191181972	191187058	UMR_3619|257|257|173|11656|0.015	0	.
chr1	191718557	191724132	UMR_3634|125|125|511|6956|0.073	0.01	.
chr1	192850882	192857308	UMR_3673|223|223|502|9106|0.055	0.024	.
chr1	194222973	194228326	UMR_3705|32|32|268|2863|0.094	0.014	.
chr1	194618751	194631316	UMR_3708|183|183|186|8059|0.023	0	.
chr10	4386127	4392273	UMR_3743|307|307|482|8702|0.055	0.019	.
chr10	9673688	9678738	UMR_3835|190|190|144|8485|0.017	0	.
chr10	13963709	13971292	UMR_3895|332|332|403|12872|0.031	0	.
chr10	14042864	14049620	UMR_3901|74|74|729|5823|0.125	0.11	.
chr10	14206961	14212508	UMR_3916|72|72|709|5772|0.123	0.058	.
chr10	17721253	17729092	UMR_3930|261|261|378|13462|0.028	0	.
chr10	19351463	19364102	UMR_3981|271|271|561|18996|0.030	0.013	.
chr10	22148210	22160422	UMR_4062|418|431|265|17221|0.015	0	.
chr10	22811595	22823648	UMR_4083|249|249|411|16856|0.024	0.007	.
chr10	28072121	28081120	UMR_4153|196|196|708|10739|0.066	0	.
chr10	29142557	29149215	UMR_4155|191|191|110|10388|0.011	0	.
chr10	29532499	29540468	UMR_4163|145|145|293|9409|0.031	0	.
chr10	34296353	34302666	UMR_4193|117|117|428|8807|0.049	0.007	.
chr10	37134496	37141754	UMR_4198|384|384|422|18322|0.023	0.005	.
chr10	40681803	40689524	UMR_4272|116|116|706|6012|0.117	0.009	.
chr10	40880140	40891680	UMR_4287|260|266|1077|15031|0.072	0.014	.
chr10	41930959	41936641	UMR_4322|81|81|633|4770|0.133	0.025	.
chr10	42273552	42279162	UMR_4337|398|398|143|11771|0.012	0	.
chr10	42577121	42593280	UMR_4347|532|532|724|26611|0.027	0	.
chr10	42630426	42637628	UMR_4349|257|257|315|14198|0.022	0.009	.
chr10	43070907	43076258	UMR_4377|79|79|791|6841|0.116	0.085	.
chr10	43168523	43177135	UMR_4393|277|277|644|11982|0.054	0	.
chr10	44997107	45003576	UMR_4441|72|72|1018|6435|0.158	0.072	.
chr10	45468763	45474300	UMR_4452|94|94|849|8721|0.097	0.024	.
chr10	49780029	49789960	UMR_4463|155|155|444|9913|0.045	0.006	.
chr10	50890069	50911922	UMR_4465|522|522|1066|33760|0.032	0.008	.
chr10	52021081	52030538	UMR_4473|234|234|350|12498|0.028	0.008	.
chr10	53375370	53380672	UMR_4488|112|112|471|4685|0.101	0	.
chr10	58810841	58816760	UMR_4534|223|227|501|8366|0.060	0	.
chr10	59320819	59327724	UMR_4568|148|148|225|9162|0.025	0.001	.
chr10	60105117	60110304	UMR_4625|195|195|265|7749|0.034	0	.
chr10	62127981	62138555	UMR_4747|247|247|322|11904|0.027	0.009	.
chr10	62336257	62341274	UMR_4763|130|130|477|5683|0.084	0.008	.
chr10	63020822	63027157	UMR_4787|214|214|122|10357|0.012	0	.
chr10	64083586	64090974	UMR_4821|154|154|339|10921|0.031	0.006	.
chr10	67102659	67108547	UMR_4860|107|107|1224|7324|0.167	0.145	.
chr10	67123497	67128686	UMR_4864|198|198|437|8247|0.053	0.014	.
chr10	67534711	67541331	UMR_4882|329|329|277|13183|0.021	0	.
chr10	68164146	68169362	UMR_4920|56|56|455|5391|0.084	0.068	.
chr10	68273161	68283556	UMR_4929|264|264|810|19808|0.041	0.005	.
chr10	69569557	69575443	UMR_4971|106|106|567|8889|0.064	0.026	.
chr10	69705205	69711666	UMR_4984|77|77|336|5584|0.060	0.012	.
chr10	69741741	69747069	UMR_4991|58|58|543|4418|0.123	0.105	.
chr10	73096321	73101399	UMR_5103|199|199|215|9041|0.024	0	.
chr10	75058733	75064212	UMR_5125|278|278|448|8550|0.052	0.02	.
chr10	79852908	79858938	UMR_5325|228|228|198|8512|0.023	0	.
chr10	79916029	79922166	UMR_5338|234|234|323|8228|0.039	0.009	.
chr10	80147478	80153444	UMR_5364|304|304|62|8227|0.008	0	.
chr10	80156745	80162186	UMR_5366|156|156|151|7109|0.021	0.009	.
chr10	80488243	80495786	UMR_5411|264|264|205|9214|0.022	0.007	.
chr10	80495925	80506674	UMR_5412|242|242|485|12341|0.039	0.01	.
chr10	80573478	80579647	UMR_5422|287|287|298|8943|0.033	0	.
chr10	80928454	80938048	UMR_5453|366|366|491|15043|0.033	0	.
chr10	81133909	81139136	UMR_5473|331|331|271|10820|0.025	0.007	.
chr10	81172909	81178050	UMR_5476|184|184|435|7850|0.055	0	.
chr10	81474843	81483196	UMR_5531|156|156|671|6815|0.098	0.023	.
chr10	81568298	81573390	UMR_5540|123|123|303|6049|0.050	0.014	.
chr10	84435289	84442726	UMR_5632|227|227|221|9665|0.023	0.006	.
chr10	84754443	84760935	UMR_5648|314|314|598|15044|0.040	0.009	.
chr10	86778137	86783495	UMR_5705|148|148|499|6773|0.074	0	.
chr10	87488201	87495238	UMR_5731|241|241|215|10586|0.020	0	.
chr10	90575129	90580711	UMR_5779|85|85|229|8007|0.029	0.005	.
chr10	90676065	90682250	UMR_5787|59|59|734|5845|0.126	0.075	.
chr10	93160053	93167266	UMR_5880|224|224|267|11598|0.023	0	.
chr10	96615960	96621592	UMR_6050|191|195|284|7890|0.036	0	.
chr10	98912725	98922678	UMR_6073|355|355|701|13204|0.053	0	.
chr10	99260791	99270664	UMR_6101|321|321|428|15750|0.027	0	.
chr10	100015215	100020737	UMR_6135|155|155|179|9031|0.020	0.005	.
chr10	103025208	103032848	UMR_6153|207|207|328|15020|0.022	0.006	.
chr10	105571797	105578811	UMR_6164|201|201|740|11970|0.062	0	.
chr10	108160899	108166739	UMR_6179|209|209|379|7987|0.047	0.005	.
chr10	109002863	109012314	UMR_6210|146|146|417|10862|0.038	0.008	.
chr10	111472095	111477296	UMR_6273|161|161|359|6864|0.052	0.014	.
chr10	111502543	111509222	UMR_6274|214|214|782|9906|0.079	0	.
chr10	117147475	117152946	UMR_6378|201|201|321|9415|0.034	0	.
chr10	118865505	118871418	UMR_6454|270|270|300|9755|0.031	0	.
chr10	120471824	120478940	UMR_6520|319|319|253|13726|0.018	0	.
chr10	121471407	121477798	UMR_6591|217|217|481|9662|0.050	0.012	.
chr10	123263336	123268941	UMR_6672|226|226|613|11099|0.055	0	.
chr10	126923757	126931937	UMR_6732|125|125|565|6244|0.090	0.013	.
chr10	126977873	126985112	UMR_6738|265|270|143|8226|0.017	0	.
chr10	127058191	127064750	UMR_6743|293|293|617|10474|0.059	0.009	.
chr10	127076091	127084132	UMR_6745|260|260|217|8606|0.025	0	.
chr10	127507713	127515248	UMR_6778|240|240|315|11131|0.028	0.005	.
chr10	127523915	127537280	UMR_6781|372|372|353|14965|0.024	0.008	.
chr10	127661055	127669689	UMR_6787|294|294|393|12560|0.031	0.008	.
chr10	128489397	128494937	UMR_6824|113|113|306|5487|0.056	0.008	.
chr11	3288181	3294358	UMR_6861|288|288|101|9861|0.010	0	.
chr11	6469791	6475778	UMR_7018|151|151|508|7564|0.067	0	.
chr11	12459716	12465500	UMR_7087|131|131|679|6557|0.104	0.021	.
chr11	16256831	16262317	UMR_7091|131|131|137|7143|0.019	0	.
chr11	18869045	18879978	UMR_7116|303|304|472|19417|0.024	0.007	.
chr11	19014223	19023784	UMR_7120|290|290|946|18591|0.051	0.013	.
chr11	21567531	21572850	UMR_7178|99|99|288|6608|0.044	0	.
chr11	21991167	22010226	UMR_7179|715|715|587|34987|0.017	0.006	.
chr11	22075035	22081734	UMR_7184|63|63|741|6605|0.112	0.051	.
chr11	24058788	24064898	UMR_7219|79|79|445|7044|0.063	0.009	.
chr11	24071425	24101517	UMR_7220|643|643|1278|41106|0.031	0.003	.
chr11	25852533	25857716	UMR_7266|69|69|451|6482|0.070	0.015	.
chr11	30261493	30269549	UMR_7303|205|205|532|9105|0.058	0	.
chr11	31869959	31878827	UMR_7321|143|143|170|9231|0.018	0	.
chr11	32008557	32013580	UMR_7326|54|54|304|4470|0.068	0.032	.
chr11	33143791	33151430	UMR_7381|240|240|576|9122|0.063	0	.
chr11	33192984	33206540	UMR_7386|545|545|706|26365|0.027	0.006	.
chr11	36651617	36656939	UMR_7499|37|37|323|3590|0.090	0.059	.
chr11	40689985	40695290	UMR_7522|144|144|255|9172|0.028	0	.
chr11	42178864	42184032	UMR_7530|85|85|264|6280|0.042	0.004	.
chr11	42419098	42426304	UMR_7531|108|108|236|6259|0.038	0.006	.
chr11	44610517	44622620	UMR_7578|337|337|874|19783|0.044	0.008	.
chr11	48852529	48859571	UMR_7644|217|217|113|15875|0.007	0.003	.
chr11	50376181	50382121	UMR_7702|194|194|518|10091|0.051	0	.
chr11	53518729	53524742	UMR_7814|170|170|451|6532|0.069	0.008	.
chr11	57826747	57841972	UMR_7943|400|400|891|21247|0.042	0.013	.
chr11	58952567	58958160	UMR_7971|153|153|124|7831|0.016	0	.
chr11	61170131	61176048	UMR_8066|155|155|339|8007|0.042	0	.
chr11	62602023	62608190	UMR_8107|127|127|433|6983|0.062	0.008	.
chr11	63916703	63925926	UMR_8153|429|429|638|19036|0.034	0	.
chr11	67595639	67605810	UMR_8223|100|100|459|6880|0.067	0.025	.
chr11	68381587	68387579	UMR_8255|333|333|310|12265|0.025	0	.
chr11	69058648	69064594	UMR_8294|276|276|119|13294|0.009	0	.
chr11	69086137	69091354	UMR_8298|137|137|353|5548|0.064	0.009	.
chr11	69094489	69100604	UMR_8299|186|186|67|9427|0.007	0	.
chr11	69117131	69126646	UMR_8301|371|371|324|21260|0.015	0.002	.
chr11	69364041	69372883	UMR_8316|291|291|445|13378|0.033	0.011	.
chr11	69394351	69400060	UMR_8318|261|265|770|12106|0.064	0.011	.
chr11	69408309	69422034	UMR_8320|457|457|347|20714|0.017	0	.
chr11	69556166	69561961	UMR_8330|144|144|468|5778|0.081	0.012	.
chr11	69799101	69806031	UMR_8348|277|277|245|12008|0.020	0	.
chr11	69833564	69839333	UMR_8349|220|220|117|7839|0.015	0	.
chr11	70017165	70024788	UMR_8369|148|148|270|7755|0.035	0.009	.
chr11	70025279	70030732	UMR_8370|113|113|253|5916|0.043	0.01	.
chr11	70561635	70567252	UMR_8390|146|146|486|6905|0.070	0.005	.
chr11	72037861	72043114	UMR_8449|112|112|454|5769|0.079	0.007	.
chr11	72486709	72495004	UMR_8481|215|215|862|8602|0.100	0.016	.
chr11	73018387	73024493	UMR_8492|150|150|349|5555|0.063	0	.
chr11	74828519	74833634	UMR_8517|240|240|103|8820|0.012	0	.
chr11	75164778	75175213	UMR_8529|631|631|480|20356|0.024	0.005	.
chr11	75189443	75196386	UMR_8531|279|279|401|9916|0.040	0	.
chr11	75277755	75283092	UMR_8547|96|96|294|5576|0.053	0.019	.
chr11	75289239	75295372	UMR_8548|107|107|609|7065|0.086	0.043	.
chr11	75530165	75535302	UMR_8562|180|180|573|8053|0.071	0	.
chr11	75732096	75737825	UMR_8575|157|158|312|6125|0.051	0.01	.
chr11	77867137	77873533	UMR_8710|78|78|438|4815|0.091	0.015	.
chr11	77892397	77898353	UMR_8716|90|90|731|6902|0.106	0.024	.
chr11	77929961	77935705	UMR_8723|181|181|184|7184|0.026	0	.
chr11	77979893	77985744	UMR_8731|255|255|455|9240|0.049	0	.
chr11	80477018	80486030	UMR_8849|258|258|265|10947|0.024	0.007	.
chr11	83848815	83856134	UMR_8966|253|253|479|14943|0.032	0.007	.
chr11	84512687	84530656	UMR_8989|596|596|726|33422|0.022	0.006	.
chr11	85827237	85845221	UMR_9044|763|763|721|31215|0.023	0.009	.
chr11	85885652	85896856	UMR_9046|297|297|721|16352|0.044	0.01	.
chr11	87759611	87765578	UMR_9125|160|160|72|6459|0.011	0	.
chr11	88066993	88072001	UMR_9136|221|221|266|8813|0.030	0.006	.
chr11	88581327	88589453	UMR_9195|114|114|638|8401|0.076	0.036	.
chr11	88689728	88694780	UMR_9200|80|80|1010|5916|0.171	0.12	.
chr11	89297591	89304078	UMR_9236|341|341|163|12380|0.013	0	.
chr11	93096610	93102776	UMR_9285|201|201|188|9890|0.019	0	.
chr11	94042803	94047816	UMR_9301|39|39|113|4104|0.028	0.005	.
chr11	94208807	94214020	UMR_9308|233|233|185|9078|0.020	0	.
chr11	94468341	94476613	UMR_9335|226|226|251|8184|0.031	0	.
chr11	94988623	94994822	UMR_9360|263|263|232|8574|0.027	0	.
chr11	95118343	95125098	UMR_9375|238|238|731|11751|0.062	0.012	.
chr11	95140935	95146614	UMR_9378|194|194|414|9118|0.045	0.006	.
chr11	96001119	96009270	UMR_9437|337|337|387|13536|0.029	0	.
chr11	96168694	96207140	UMR_9443|648|648|1946|44822|0.043	0.013	.
chr11	96250435	96356905	UMR_9446|2743|2744|3418|155156|0.022	0.009	.
chr11	96363290	96373140	UMR_9447|149|149|662|9133|0.072	0.024	.
chr11	96872339	96877394	UMR_9486|106|106|233|5633|0.041	0.005	.
chr11	97017140	97022938	UMR_9506|251|251|383|9459|0.040	0	.
chr11	97147851	97153202	UMR_9525|251|251|348|7431|0.047	0.012	.
chr11	97564860	97576068	UMR_9555|292|292|369|9997|0.037	0.01	.
chr11	97626007	97632357	UMR_9563|311|311|240|10906|0.022	0	.
chr11	97798228	97803628	UMR_9582|186|186|247|8173|0.030	0	.
chr11	97985506	97990665	UMR_9592|187|189|256|8232|0.031	0.006	.
chr11	97998802	98004676	UMR_9594|99|100|430|4683|0.092	0.057	.
chr11	98018305	98023390	UMR_9596|142|147|130|4999|0.026	0	.
chr11	98293989	98299394	UMR_9612|124|126|235|5322|0.044	0.012	.
chr11	98313154	98330816	UMR_9614|491|494|413|21624|0.019	0	.
chr11	98332952	98343278	UMR_9615|271|273|742|10914|0.068	0.013	.
chr11	98345093	98350910	UMR_9616|163|163|193|7039|0.027	0.007	.
chr11	98737967	98752395	UMR_9650|302|304|364|12867|0.028	0.006	.
chr11	98770089	98777986	UMR_9653|183|185|429|8890|0.048	0.012	.
chr11	98927395	98933863	UMR_9674|111|111|351|4804|0.073	0.044	.
chr11	98935739	98945870	UMR_9675|244|244|843|9485|0.089	0.01	.
chr11	98959201	98968013	UMR_9678|244|245|525|8373|0.063	0.01	.
chr11	101169349	101177839	UMR_9798|309|309|375|13860|0.027	0	.
chr11	101258969	101266264	UMR_9805|221|223|268|9912|0.027	0.01	.
chr11	102215567	102220748	UMR_9888|101|101|440|4478|0.098	0.058	.
chr11	102315299	102321126	UMR_9901|428|428|263|13229|0.020	0	.
chr11	102392603	102397662	UMR_9903|113|113|220|5141|0.043	0.013	.
chr11	102444663	102449939	UMR_9910|161|161|232|5865|0.040	0.009	.
chr11	102602587	102611944	UMR_9919|310|310|352|14594|0.024	0	.
chr11	103358738	103365548	UMR_9991|289|289|305|11299|0.027	0.007	.
chr11	103770469	103775854	UMR_10007|188|188|227|8614|0.026	0.008	.
chr11	104229617	104238423	UMR_10029|300|300|392|13114|0.030	0	.
chr11	104437963	104443466	UMR_10041|206|206|95|8884|0.011	0	.
chr11	106784427	106790568	UMR_10137|242|242|240|10593|0.023	0	.
chr11	107468343	107473707	UMR_10175|183|183|661|7748|0.085	0	.
chr11	108919383	108925498	UMR_10244|318|318|262|10315|0.025	0	.
chr11	109648331	109653864	UMR_10296|202|202|316|9795|0.032	0.003	.
chr11	111064324	111069994	UMR_10330|105|105|341|8118|0.042	0	.
chr11	112779505	112788966	UMR_10358|348|348|632|17792|0.036	0	.
chr11	113947589	113952646	UMR_10483|83|83|423|4984|0.085	0.065	.
chr11	115508599	115514932	UMR_10623|128|128|204|5844|0.035	0	.
chr11	116917440	116922874	UMR_10743|206|206|209|7215|0.029	0.008	.
chr11	117114240	117121584	UMR_10776|235|235|511|10967|0.047	0.01	.
chr11	117962771	117970613	UMR_10868|309|309|344|11010|0.031	0	.
chr11	118196721	118203660	UMR_10882|88|88|337|4999|0.067	0.021	.
chr11	118207189	118213098	UMR_10883|57|57|452|3372|0.134	0.084	.
chr11	118904987	118910944	UMR_10966|268|268|181|9265|0.020	0	.
chr11	119039506	119059884	UMR_10982|772|772|530|33070|0.016	0.006	.
chr11	119078537	119092062	UMR_10983|605|605|1035|22159|0.047	0.009	.
chr11	119544852	119551674	UMR_11023|309|309|138|9449|0.015	0	.
chr11	119934699	119945797	UMR_11041|303|303|595|12681|0.047	0.012	.
chr11	120184393	120190786	UMR_11066|299|299|273|12826|0.021	0	.
chr11	120228673	120237056	UMR_11068|476|476|204|19926|0.010	0	.
chr11	120237103	120243457	UMR_11069|216|216|627|10888|0.058	0.01	.
chr12	3545694	3550726	UMR_11157|57|57|493|2896|0.170	0.115	.
chr12	5352741	5361136	UMR_11262|94|94|1047|8696|0.120	0.096	.
chr12	5371022	5378712	UMR_11265|266|266|407|10324|0.039	0	.
chr12	8296517	8303362	UMR_11277|328|328|344|12428|0.028	0.011	.
chr12	8495927	8501118	UMR_11287|208|208|107|7339|0.015	0	.
chr12	9569591	9585636	UMR_11297|363|363|285|21671|0.013	0.006	.
chr12	11432793	11438788	UMR_11308|138|138|311|9224|0.034	0.006	.
chr12	12260950	12268379	UMR_11316|111|111|417|5657|0.074	0.011	.
chr12	12313674	12318793	UMR_11324|66|66|609|4279|0.142	0.058	.
chr12	12935651	12943692	UMR_11353|319|319|641|15772|0.041	0	.
chr12	15809729	15817666	UMR_11379|254|254|250|13734|0.018	0	.
chr12	16799715	16804982	UMR_11413|99|101|288|4379|0.066	0	.
chr12	17097015	17104873	UMR_11443|56|60|348|3670|0.095	0.035	.
chr12	21413875	21419590	UMR_11518|159|169|136|6473|0.021	0	.
chr12	25092090	25101692	UMR_11561|385|385|185|19625|0.009	0	.
chr12	27059919	27065868	UMR_11607|77|77|88|5942|0.015	0.006	.
chr12	27333811	27344816	UMR_11617|456|456|316|22175|0.014	0	.
chr12	29525863	29541233	UMR_11680|202|202|325|14592|0.022	0.006	.
chr12	29553175	29558199	UMR_11684|42|42|276|3136|0.088	0.069	.
chr12	29694761	29700044	UMR_11696|53|53|377|4165|0.091	0.018	.
chr12	31709151	31714564	UMR_11747|39|39|143|4439|0.032	0.018	.
chr12	33952781	33958134	UMR_11822|183|183|301|8960|0.034	0.008	.
chr12	33958259	33969424	UMR_11823|244|244|434|15811|0.027	0.007	.
chr12	38777841	38785020	UMR_11854|143|143|601|11043|0.054	0.004	.
chr12	41481155	41486438	UMR_11896|69|69|158|5997|0.026	0.004	.
chr12	44328174	44333211	UMR_11906|168|168|225|6099|0.037	0	.
chr12	49371367	49405454	UMR_11932|739|739|599|46950|0.013	0	.
chr12	49945295	49954566	UMR_11934|78|78|1338|8729|0.153	0.064	.
chr12	50107769	50123708	UMR_11939|109|109|552|12062|0.046	0.022	.
chr12	50185887	50197971	UMR_11940|61|61|1122|7787|0.144	0.037	.
chr12	50999008	51005334	UMR_11958|84|84|624|7044|0.089	0.021	.
chr12	52831688	52836786	UMR_12008|75|75|427|6068|0.070	0.044	.
chr12	53060648	53066312	UMR_12023|54|54|368|5767|0.064	0.011	.
chr12	53246078	53252510	UMR_12028|199|199|554|9124|0.061	0.006	.
chr12	54733390	54738558	UMR_12071|25|166|12|244|0.049	0	.
chr12	55123911	55239306	UMR_12082|28|1211|0|729|0.000	0	.
chr12	56519219	56525207	UMR_12113|150|150|672|9407|0.071	0.013	.
chr12	56525443	56541572	UMR_12114|463|463|661|23974|0.028	0.006	.
chr12	56608023	56616928	UMR_12115|202|202|320|10033|0.032	0.009	.
chr12	56685676	56702488	UMR_12120|463|463|695|29128|0.024	0.007	.
chr12	57533923	57545912	UMR_12129|442|442|661|24865|0.027	0.009	.
chr12	57545949	57554849	UMR_12130|221|221|452|12946|0.035	0.006	.
chr12	59008444	59014040	UMR_12142|156|156|544|10468|0.052	0.005	.
chr12	61519913	61529122	UMR_12157|181|181|214|9974|0.021	0	.
chr12	67218798	67223810	UMR_12170|209|209|72|8303|0.009	0	.
chr12	70107837	70114128	UMR_12231|208|208|365|8506|0.043	0	.
chr12	70339529	70348916	UMR_12249|213|213|508|11808|0.043	0.007	.
chr12	70823448	70831010	UMR_12270|202|203|671|9333|0.072	0	.
chr12	72936311	72942592	UMR_12367|193|193|417|11583|0.036	0.007	.
chr12	73034607	73055891	UMR_12369|639|639|616|36012|0.017	0.006	.
chr12	75174985	75180688	UMR_12420|134|134|419|8195|0.051	0.007	.
chr12	76367017	76372260	UMR_12460|326|326|217|10544|0.021	0	.
chr12	76816651	76823582	UMR_12491|162|162|706|7507|0.094	0.019	.
chr12	77852588	77858176	UMR_12514|62|62|1047|5570|0.188	0.11	.
chr12	80108732	80116688	UMR_12572|366|376|199|16362|0.012	0	.
chr12	81855640	81863075	UMR_12637|256|256|568|9618|0.059	0.004	.
chr12	83484451	83489685	UMR_12692|237|237|101|12298|0.008	0	.
chr12	85471540	85476640	UMR_12781|221|221|183|9769|0.019	0	.
chr12	86798817	86808316	UMR_12849|138|138|584|8086|0.072	0.007	.
chr12	86878516	86898804	UMR_12863|603|610|936|27144|0.034	0	.
chr12	86944892	86950849	UMR_12872|160|160|256|8745|0.029	0	.
chr12	87040393	87045499	UMR_12884|43|43|430|2664|0.161	0.083	.
chr12	89811187	89818800	UMR_12906|103|104|552|7167|0.077	0.007	.
chr12	95690302	95701553	UMR_12945|254|254|456|13979|0.033	0.004	.
chr12	98571419	98578537	UMR_12966|190|190|328|8430|0.039	0	.
chr12	98733663	98739106	UMR_12971|172|172|694|11055|0.063	0.008	.
chr12	100198661	100205280	UMR_13068|235|235|229|8720|0.026	0	.
chr12	100207475	100215158	UMR_13070|83|83|1045|6058|0.172	0.102	.
chr12	104468636	104479410	UMR_13229|389|389|660|20476|0.032	0.005	.
chr12	105957645	105963688	UMR_13309|142|142|495|10974|0.045	0.008	.
chr12	107927755	107932885	UMR_13399|106|106|351|6941|0.051	0.006	.
chr12	107975381	107982124	UMR_13408|196|196|737|10593|0.070	0.019	.
chr12	107999889	108007722	UMR_13414|358|358|570|15877|0.036	0	.
chr12	108272192	108278763	UMR_13437|327|327|436|10916|0.040	0.012	.
chr12	109449249	109454550	UMR_13507|174|174|210|5974|0.035	0.009	.
chr12	110185603	110191738	UMR_13542|171|171|203|8048|0.025	0.006	.
chr12	110278633	110284396	UMR_13546|237|237|467|10075|0.046	0.012	.
chr12	110598381	110605388	UMR_13564|180|180|647|8378|0.077	0.004	.
chr12	111441560	111449832	UMR_13614|231|231|466|9159|0.051	0.033	.
chr12	117148284	117161388	UMR_13775|350|350|946|18202|0.052	0.019	.
chr12	117169627	117177061	UMR_13776|99|99|958|6417|0.149	0.109	.
chr12	117527260	117535459	UMR_13789|184|184|870|8871|0.098	0.054	.
chr12	118839550	118844564	UMR_13813|97|97|719|7728|0.093	0.008	.
chr12	118846226	118856884	UMR_13814|386|386|1108|19028|0.058	0	.
chr12	119234687	119240016	UMR_13817|91|91|195|5145|0.038	0.005	.
chr13	5860301	5867150	UMR_13833|173|173|289|11205|0.026	0	.
chr13	14516991	14524056	UMR_13928|101|101|282|6126|0.046	0	.
chr13	15461697	15469589	UMR_13934|269|269|216|11802|0.018	0	.
chr13	15541685	15547999	UMR_13938|58|58|345|5144|0.067	0.048	.
chr13	15616805	15622485	UMR_13941|61|61|769|5660|0.136	0.06	.
chr13	21166535	21173994	UMR_13997|186|186|553|17133|0.032	0.004	.
chr13	21778652	21788852	UMR_14029|229|285|980|15314|0.064	0	.
chr13	21801154	21812419	UMR_14031|38|288|4|662|0.006	0	.
chr13	21993656	21999470	UMR_14050|122|122|311|11042|0.028	0.008	.
chr13	23529894	23536792	UMR_14088|199|247|288|11789|0.024	0	.
chr13	23570039	23577100	UMR_14093|172|270|215|9242|0.023	0	.
chr13	23581160	23587291	UMR_14094|125|141|170|8456|0.020	0	.
chr13	24799550	24805694	UMR_14136|207|207|226|10590|0.021	0	.
chr13	28414717	28420826	UMR_14158|87|87|116|7355|0.016	0.004	.
chr13	28717443	28722977	UMR_14163|82|82|292|6373|0.046	0.017	.
chr13	28790421	28797906	UMR_14171|69|69|653|6446|0.101	0.024	.
chr13	28881121	28887522	UMR_14182|135|135|1120|10350|0.108	0.027	.
chr13	28946608	28954594	UMR_14184|318|318|172|17679|0.010	0	.
chr13	29013373	29019162	UMR_14186|103|103|554|9107|0.061	0.045	.
chr13	31612855	31632884	UMR_14241|608|608|659|30199|0.022	0.008	.
chr13	31799819	31812149	UMR_14245|607|608|584|26246|0.022	0.006	.
chr13	34125111	34134730	UMR_14259|189|220|106|10961|0.010	0.006	.
chr13	34341401	34346682	UMR_14276|231|231|145|7885|0.018	0	.
chr13	35737626	35743454	UMR_14291|273|273|699|11399|0.061	0.01	.
chr13	36722425	36737144	UMR_14321|437|437|386|27396|0.014	0.005	.
chr13	37824543	37832530	UMR_14338|294|294|554|12053|0.046	0	.
chr13	40701424	40717594	UMR_14374|359|359|1037|24113|0.043	0.01	.
chr13	40722399	40745353	UMR_14376|791|791|1131|43900|0.026	0.006	.
chr13	41354178	41360730	UMR_14408|116|116|370|8415|0.044	0.006	.
chr13	42680341	42686230	UMR_14435|64|64|184|5165|0.036	0.02	.
chr13	43299012	43305485	UMR_14498|234|234|199|9787|0.020	0	.
chr13	44729205	44735234	UMR_14602|318|318|218|12681|0.017	0	.
chr13	45959934	45967263	UMR_14698|299|299|178|13814|0.013	0	.
chr13	46038373	46043821	UMR_14706|89|89|811|6570|0.123	0.076	.
chr13	48259377	48266568	UMR_14839|261|261|606|14533|0.042	0.008	.
chr13	48540283	48547237	UMR_14853|175|175|610|7285|0.084	0	.
chr13	48653311	48662972	UMR_14858|204|204|668|11197|0.060	0.008	.
chr13	48663055	48673334	UMR_14859|334|334|467|14678|0.032	0.012	.
chr13	51564141	51570877	UMR_14932|217|217|248|11102|0.022	0	.
chr13	51844609	51849994	UMR_14960|250|250|78|10789|0.007	0	.
chr13	52526477	52531504	UMR_14995|106|106|190|6371|0.030	0.004	.
chr13	52977674	52983270	UMR_15025|342|342|289|14765|0.020	0	.
chr13	53461172	53477032	UMR_15052|432|432|850|24071|0.035	0.007	.
chr13	54745666	54753278	UMR_15136|234|234|905|9692|0.093	0.052	.
chr13	54754121	54761222	UMR_15137|147|147|408|7889|0.052	0.007	.
chr13	55467677	55475827	UMR_15203|291|291|328|9737|0.034	0	.
chr13	55482583	55488964	UMR_15205|186|186|96|6357|0.015	0	.
chr13	55823528	55838236	UMR_15225|549|549|438|23686|0.018	0.006	.
chr13	56248701	56261340	UMR_15249|370|370|798|17618|0.045	0.009	.
chr13	58806003	58813380	UMR_15377|240|240|328|12040|0.027	0	.
chr13	60172019	60179004	UMR_15467|334|334|157|14314|0.011	0	.
chr13	63562275	63575424	UMR_15543|556|556|357|23790|0.015	0	.
chr13	68602915	68609621	UMR_15605|63|63|809|4642|0.174	0.095	.
chr13	71956329	71969160	UMR_15687|453|453|426|22841|0.019	0.006	.
chr13	72622277	72640550	UMR_15699|613|613|1164|31306|0.037	0.007	.
chr13	73257901	73273817	UMR_15711|506|506|734|26225|0.028	0.009	.
chr13	76382919	76389772	UMR_15756|169|169|520|7691|0.068	0	.
chr13	78167237	78212516	UMR_15770|961|961|2812|57464|0.049	0.013	.
chr13	80611386	80616553	UMR_15782|52|52|674|6286|0.107	0.058	.
chr13	80881709	80888120	UMR_15784|244|244|263|13684|0.019	0	.
chr13	81627816	81633648	UMR_15791|74|74|668|5530|0.121	0.011	.
chr13	81942534	81947616	UMR_15803|69|69|513|6601|0.078	0.02	.
chr13	83516925	83547190	UMR_15813|290|290|2381|26904|0.088	0.014	.
chr13	83565175	83572861	UMR_15817|75|75|647|7283|0.089	0.044	.
chr13	83573582	83580187	UMR_15818|52|52|828|5959|0.139	0.13	.
chr13	83583709	83589870	UMR_15819|35|35|629|3714|0.169	0.142	.
chr13	83603423	83610288	UMR_15820|58|58|750|5989|0.125	0.059	.
chr13	83651377	83663360	UMR_15824|138|138|995|13412|0.074	0.039	.
chr13	83711943	83751134	UMR_15826|774|774|567|53612|0.011	0	.
chr13	83865700	83873947	UMR_15827|42|42|688|4931|0.140	0.112	.
chr13	83983961	83989470	UMR_15830|47|47|341|5387|0.063	0.007	.
chr13	84051953	84068808	UMR_15832|114|114|369|11605|0.032	0.01	.
chr13	84341753	84351459	UMR_15836|189|189|457|14614|0.031	0.003	.
chr13	84747945	84764594	UMR_15844|113|113|343|14566|0.024	0.013	.
chr13	89737437	89743755	UMR_15858|174|174|303|11173|0.027	0	.
chr13	93299045	93316356	UMR_15930|286|286|1040|17742|0.059	0.009	.
chr13	94706271	94711806	UMR_15988|159|159|521|10120|0.051	0.006	.
chr13	94868439	94886318	UMR_15991|660|660|1194|35561|0.034	0.007	.
chr13	96665147	96672245	UMR_16045|179|179|510|10920|0.047	0.004	.
chr13	97237557	97254152	UMR_16068|390|390|1010|22215|0.045	0.011	.
chr13	97388639	97393736	UMR_16081|54|54|738|4061|0.182	0.109	.
chr13	98355463	98369386	UMR_16151|374|374|492|21304|0.023	0.008	.
chr13	98500719	98506767	UMR_16156|197|197|204|11552|0.018	0.007	.
chr13	99441504	99448980	UMR_16201|109|109|340|7663|0.044	0.016	.
chr13	99492357	99505548	UMR_16214|179|179|1401|14996|0.093	0.023	.
chr13	99508719	99517164	UMR_16216|208|208|284|11360|0.025	0.006	.
chr13	101212211	101220012	UMR_16278|87|87|1149|6962|0.165	0.128	.
chr13	101689599	101696750	UMR_16281|136|136|197|9125|0.022	0.003	.
chr13	101763723	101769464	UMR_16288|191|191|454|8124|0.056	0	.
chr13	105048611	105055732	UMR_16368|157|157|277|8752|0.032	0.005	.
chr13	105441519	105449476	UMR_16372|135|135|705|8947|0.079	0.006	.
chr13	107795447	107800652	UMR_16409|49|49|794|4157|0.191	0.129	.
chr13	109925781	109933257	UMR_16469|84|84|479|7342|0.065	0.039	.
chr13	110111908	110117671	UMR_16474|53|53|728|4681|0.156	0.127	.
chr13	110393971	110401562	UMR_16484|239|239|1026|13859|0.074	0.007	.
chr13	112985653	112995138	UMR_16555|349|351|353|14165|0.025	0	.
chr13	114455833	114461053	UMR_16613|272|272|162|13339|0.012	0	.
chr13	116292610	116315134	UMR_16634|452|452|684|33402|0.020	0.007	.
chr13	116705033	116712742	UMR_16637|188|188|275|14289|0.019	0.006	.
chr13	119688513	119698224	UMR_16663|147|147|708|9896|0.072	0.011	.
chr13	119959423	119970490	UMR_16669|79|278|17|1430|0.012	0	.
chr13	120022785	120048362	UMR_16671|241|649|386|8930|0.043	0.012	.
chr14	3571941	3657342	UMR_16677|32|635|110|337|0.326	0	.
chr14	5070253	5075774	UMR_16689|43|123|22|454|0.048	0.033	.
chr14	9641879	9649008	UMR_16743|48|48|524|4219|0.124	0.082	.
chr14	11551975	11557119	UMR_16745|270|270|87|12737|0.007	0	.
chr14	12336391	12350560	UMR_16771|415|415|985|23802|0.041	0.01	.
chr14	12387295	12395092	UMR_16772|93|93|547|7808|0.070	0.021	.
chr14	12817883	12824431	UMR_16773|168|168|259|8071|0.032	0.006	.
chr14	14062839	14071818	UMR_16783|87|87|862|7617|0.113	0.044	.
chr14	17658795	17663827	UMR_16804|159|159|191|7517|0.025	0	.
chr14	21981389	21992690	UMR_16926|558|558|366|27014|0.014	0	.
chr14	24000803	24008732	UMR_16959|233|233|315|8673|0.036	0	.
chr14	25456512	25465526	UMR_17024|379|379|428|14934|0.029	0	.
chr14	25603939	25611718	UMR_17042|268|268|756|8285|0.091	0.01	.
chr14	29717540	29723806	UMR_17117|251|253|375|10096|0.037	0	.
chr14	30346461	30353409	UMR_17142|104|104|891|7141|0.125	0.053	.
chr14	32459895	32466304	UMR_17222|299|299|300|10735|0.028	0.01	.
chr14	39467427	39472864	UMR_17307|98|98|256|4196|0.061	0.016	.
chr14	40955523	40963219	UMR_17313|68|76|523|4316|0.121	0.071	.
chr14	46385173	46390924	UMR_17355|271|271|172|12803|0.013	0	.
chr14	46880882	46886582	UMR_17364|291|291|215|11723|0.018	0	.
chr14	48118726	48124013	UMR_17409|206|206|273|8832|0.031	0	.
chr14	48661479	48674956	UMR_17433|418|418|691|27680|0.025	0.008	.
chr14	52008881	52014521	UMR_17486|166|166|352|6318|0.056	0.017	.
chr14	52325781	52331910	UMR_17503|87|87|376|6445|0.058	0.013	.
chr14	54571980	54578764	UMR_17532|270|270|232|10414|0.022	0	.
chr14	55107601	55112714	UMR_17569|67|67|351|4198|0.084	0.042	.
chr14	57525496	57531218	UMR_17641|102|102|827|5836|0.142	0.058	.
chr14	58069730	58077297	UMR_17663|382|383|155|16580|0.009	0	.
chr14	59624514	59629542	UMR_17673|181|181|365|8249|0.044	0	.
chr14	60377464	60383710	UMR_17696|203|203|453|9483|0.048	0	.
chr14	63239483	63257462	UMR_17806|515|515|970|27226|0.036	0.009	.
chr14	63260872	63272098	UMR_17807|218|218|431|15936|0.027	0.011	.
chr14	64198670	64203995	UMR_17843|63|63|416|4487|0.093	0.014	.
chr14	64399281	64409416	UMR_17865|62|62|772|5609|0.138	0.057	.
chr14	64580708	64596183	UMR_17884|371|371|448|22672|0.020	0.006	.
chr14	65258241	65263286	UMR_17912|193|193|381|8255|0.046	0.014	.
chr14	66343430	66349602	UMR_17960|72|72|329|5035|0.065	0.041	.
chr14	66862929	66869888	UMR_17979|205|205|305|10561|0.029	0	.
chr14	67227695	67240814	UMR_18007|448|448|655|25077|0.026	0.007	.
chr14	68121864	68128436	UMR_18032|239|239|359|11666|0.031	0	.
chr14	69167917	69177128	UMR_18043|196|196|302|11412|0.026	0.009	.
chr14	70074163	70082304	UMR_18082|454|454|169|16571|0.010	0	.
chr14	70456693	70463244	UMR_18101|115|115|274|6044|0.045	0.007	.
chr14	70550475	70555944	UMR_18112|168|168|292|5165|0.057	0.009	.
chr14	70622231	70629778	UMR_18121|147|147|101|6834|0.015	0.007	.
chr14	70887939	70894993	UMR_18132|192|192|252|10177|0.025	0	.
chr14	75961388	75968278	UMR_18223|67|67|513|7073|0.073	0.023	.
chr14	77155157	77160216	UMR_18298|215|215|277|9512|0.029	0	.
chr14	77577137	77582184	UMR_18308|80|80|516|5786|0.089	0.062	.
chr14	79296495	79302006	UMR_18371|144|144|477|6659|0.072	0	.
chr14	79767401	79775172	UMR_18387|404|404|272|16032|0.017	0.005	.
chr14	84441409	84451798	UMR_18412|343|343|509|17402|0.029	0.004	.
chr14	93886803	93892158	UMR_18448|130|130|183|8662|0.021	0	.
chr14	98165965	98174862	UMR_18452|215|215|427|12581|0.034	0.008	.
chr14	100281709	100287733	UMR_18482|215|215|213|10385|0.021	0	.
chr14	101837147	101844137	UMR_18502|106|106|740|8776|0.084	0.031	.
chr14	103342000	103347568	UMR_18515|151|151|299|6724|0.044	0	.
chr14	103647931	103657346	UMR_18532|203|203|837|10207|0.082	0.005	.
chr14	103678775	103683850	UMR_18533|76|76|559|5801|0.096	0.041	.
chr14	104456547	104466240	UMR_18547|249|249|246|19399|0.013	0.005	.
chr14	104466591	104474904	UMR_18548|341|341|428|16484|0.026	0.012	.
chr14	105891921	105899860	UMR_18595|359|360|417|16956|0.025	0	.
chr14	108908439	108915011	UMR_18599|149|149|69|10045|0.007	0	.
chr14	111672291	111679206	UMR_18600|219|219|372|11886|0.031	0	.
chr14	118225608	118239884	UMR_18657|536|536|1014|27927|0.036	0.005	.
chr14	120274315	120279708	UMR_18741|95|95|202|7749|0.026	0.003	.
chr14	122449642	122456186	UMR_18865|173|173|601|10456|0.057	0.009	.
chr14	122460379	122466145	UMR_18866|282|282|513|10953|0.047	0.008	.
chr14	122471127	122481474	UMR_18868|482|482|1347|23050|0.058	0.004	.
chr15	7809354	7817886	UMR_18934|351|351|406|15975|0.025	0	.
chr15	8441565	8447568	UMR_18943|269|269|174|12768|0.014	0	.
chr15	11902763	11908969	UMR_18995|290|290|340|13329|0.026	0	.
chr15	12115747	12121169	UMR_19003|190|190|201|5921|0.034	0	.
chr15	18817727	18823344	UMR_19070|66|66|398|6500|0.061	0.004	.
chr15	25403422	25419972	UMR_19099|332|337|1032|18643|0.055	0.007	.
chr15	25757877	25763771	UMR_19117|112|112|622|7083|0.088	0.059	.
chr15	27485347	27490856	UMR_19147|93|93|644|6369|0.101	0.064	.
chr15	27782085	27790320	UMR_19179|139|139|537|10021|0.054	0.014	.
chr15	31363453	31369887	UMR_19264|235|235|477|10091|0.047	0.006	.
chr15	35291973	35304480	UMR_19318|408|408|459|22873|0.020	0.006	.
chr15	36775821	36795400	UMR_19348|355|359|549|15955|0.034	0	.
chr15	37455416	37460477	UMR_19388|73|73|320|6146|0.052	0.01	.
chr15	37669295	37674929	UMR_19393|67|68|317|5414|0.059	0.043	.
chr15	38297305	38303173	UMR_19412|315|315|443|10565|0.042	0	.
chr15	38469127	38474252	UMR_19421|182|182|493|7082|0.070	0.009	.
chr15	44665882	44673058	UMR_19487|50|50|593|4662|0.127	0.147	.
chr15	44742909	44755292	UMR_19493|146|146|575|9453|0.061	0.01	.
chr15	45109523	45116842	UMR_19502|93|93|323|5188|0.062	0.005	.
chr15	48788847	48794131	UMR_19503|132|132|125|9777|0.013	0.003	.
chr15	53341430	53347496	UMR_19547|227|227|215|10761|0.020	0	.
chr15	57692647	57698674	UMR_19583|245|245|186|12532|0.015	0	.
chr15	58074504	58079709	UMR_19623|182|182|243|8391|0.029	0	.
chr15	59646109	59651266	UMR_19689|255|255|65|9544|0.007	0	.
chr15	61982816	61989421	UMR_19711|295|295|130|13921|0.009	0	.
chr15	64915619	64923877	UMR_19760|233|233|698|10402|0.067	0	.
chr15	67174309	67179522	UMR_19792|189|189|211|8566|0.025	0	.
chr15	68928713	68944212	UMR_19801|238|238|1440|16857|0.085	0.052	.
chr15	68945883	68956778	UMR_19802|130|130|1301|10314|0.126	0.119	.
chr15	68991688	68997916	UMR_19808|61|61|865|5403|0.160	0.136	.
chr15	69061032	69068106	UMR_19816|56|56|888|5306|0.167	0.119	.
chr15	72544087	72550770	UMR_19824|270|271|263|8103|0.032	0	.
chr15	74533796	74538936	UMR_19923|70|70|324|3389|0.096	0.041	.
chr15	74669751	74675199	UMR_19934|143|143|237|4721|0.050	0.013	.
chr15	75743340	75748950	UMR_19963|326|326|403|10933|0.037	0	.
chr15	76516431	76524563	UMR_20018|451|451|326|13000|0.025	0	.
chr15	78116408	78121993	UMR_20100|179|179|238|7940|0.030	0	.
chr15	78709367	78720404	UMR_20143|308|308|319|11570|0.028	0.005	.
chr15	79501458	79508248	UMR_20217|244|244|433|8076|0.054	0	.
chr15	79800512	79805843	UMR_20252|221|221|570|6325|0.090	0.032	.
chr15	80009453	80016100	UMR_20264|303|303|260|8982|0.029	0	.
chr15	80254271	80259354	UMR_20285|172|172|269|6462|0.042	0	.
chr15	81809511	81815223	UMR_20364|171|171|401|7219|0.056	0	.
chr15	81855399	81861116	UMR_20368|210|210|171|10396|0.016	0	.
chr15	83780153	83786259	UMR_20487|126|126|291|7382|0.039	0.018	.
chr15	84851513	84857170	UMR_20598|345|345|162|11979|0.014	0	.
chr15	85460565	85465667	UMR_20629|53|53|185|4176|0.044	0.026	.
chr15	85575382	85583999	UMR_20638|432|432|194|12740|0.015	0	.
chr15	85670883	85683234	UMR_20646|350|350|658|15833|0.042	0.009	.
chr15	89178837	89185094	UMR_20797|168|168|530|6735|0.079	0.005	.
chr15	89496152	89501236	UMR_20813|239|239|170|6134|0.028	0	.
chr15	92594358	92599834	UMR_20884|69|69|435|5951|0.073	0.004	.
chr15	93590602	93597187	UMR_20922|216|216|870|10815|0.080	0.027	.
chr15	95523845	95529310	UMR_21007|185|185|262|8584|0.031	0	.
chr15	96638305	96643586	UMR_21060|225|225|329|9531|0.035	0	.
chr15	96695961	96701028	UMR_21066|256|256|617|12604|0.049	0	.
chr15	97999842	98005554	UMR_21129|242|242|490|11104|0.044	0.007	.
chr15	98166697	98172156	UMR_21137|156|156|407|7307|0.056	0.006	.
chr15	98631219	98638150	UMR_21155|236|236|184|8851|0.021	0.002	.
chr15	98771379	98781439	UMR_21170|310|310|521|12806|0.041	0.005	.
chr15	98788783	98794924	UMR_21171|250|250|167|9231|0.018	0	.
chr15	98801989	98809914	UMR_21173|289|289|148|11267|0.013	0	.
chr15	98867341	98873652	UMR_21177|197|201|285|7102|0.040	0	.
chr15	98893115	98899076	UMR_21180|231|231|215|9272|0.023	0	.
chr15	98928475	98935963	UMR_21183|169|191|436|8568|0.051	0.006	.
chr15	98948051	98956396	UMR_21185|132|146|143|8347|0.017	0.003	.
chr15	98983025	98988311	UMR_21188|104|104|214|8843|0.024	0.01	.
chr15	99092981	99099644	UMR_21201|285|285|296|12970|0.023	0	.
chr15	99221006	99227788	UMR_21208|248|248|389|10340|0.038	0	.
chr15	101172897	101177968	UMR_21365|189|189|369|6477|0.057	0	.
chr15	101232245	101237347	UMR_21373|60|60|426|3340|0.128	0.084	.
chr15	102242587	102249909	UMR_21427|244|244|313|10162|0.031	0.008	.
chr15	102742321	102748397	UMR_21465|188|188|285|8921|0.032	0.008	.
chr15	102908741	103043540	UMR_21470|2747|2749|4272|163833|0.026	0.009	.
chr15	103054599	103062426	UMR_21471|145|146|479|10268|0.047	0.012	.
chr15	103165223	103171828	UMR_21484|171|171|626|7677|0.082	0.014	.
chr15	103334159	103341606	UMR_21502|117|117|527|5632|0.094	0.022	.
chr16	5883185	5888582	UMR_21569|102|102|217|4364|0.050	0.003	.
chr16	9990981	9996416	UMR_21639|242|242|265|8948|0.030	0	.
chr16	11982085	11987986	UMR_21687|202|202|386|7890|0.049	0.007	.
chr16	13355781	13368130	UMR_21701|100|100|677|8319|0.081	0.018	.
chr16	13446352	13451680	UMR_21706|170|170|312|7120|0.044	0.004	.
chr16	17796409	17808038	UMR_21779|502|502|496|16719|0.030	0	.
chr16	18127075	18132520	UMR_21795|193|193|187|6359|0.029	0	.
chr16	18580288	18592904	UMR_21822|616|616|440|22488|0.020	0	.
chr16	18620215	18631425	UMR_21824|464|464|1105|14991|0.074	0.009	.
chr16	20691447	20697846	UMR_21852|154|154|297|7377|0.040	0.009	.
chr16	23106648	23115050	UMR_21947|197|198|822|12162|0.068	0	.
chr16	23223509	23228868	UMR_21950|146|146|256|8314|0.031	0.005	.
chr16	23979907	23991680	UMR_21964|394|394|323|23511|0.014	0	.
chr16	30062552	30070468	UMR_22076|422|422|304|17313|0.018	0	.
chr16	31753805	31760299	UMR_22159|51|51|412|5643|0.073	0.029	.
chr16	34258435	34263858	UMR_22277|67|67|332|5026|0.066	0.019	.
chr16	34334562	34340236	UMR_22283|41|41|757|3576|0.212	0.144	.
chr16	34556883	34564388	UMR_22312|61|61|775|4950|0.157	0.129	.
chr16	37680711	37686859	UMR_22399|86|86|357|6234|0.057	0.008	.
chr16	38087063	38095856	UMR_22423|262|262|182|13640|0.013	0	.
chr16	42334423	42341580	UMR_22486|78|79|346|6768|0.051	0.007	.
chr16	43502071	43507672	UMR_22496|75|75|308|7218|0.043	0.01	.
chr16	44554166	44563288	UMR_22533|155|155|695|9094|0.076	0.004	.
chr16	44660845	44667151	UMR_22542|64|64|416|5539|0.075	0.04	.
chr16	46492405	46500049	UMR_22578|255|255|513|12070|0.043	0.004	.
chr16	52448631	52455060	UMR_22631|193|193|138|10667|0.013	0	.
chr16	67608633	67614366	UMR_22744|44|44|459|5545|0.083	0.052	.
chr16	67615255	67622190	UMR_22745|195|195|394|10746|0.037	0	.
chr16	74407761	74413974	UMR_22808|109|109|253|7128|0.035	0	.
chr16	76369453	76374540	UMR_22822|232|232|321|10315|0.031	0.02	.
chr16	77235213	77241129	UMR_22844|62|62|124|6070|0.020	0.007	.
chr16	77398566	77405471	UMR_22848|64|64|487|6566|0.074	0.015	.
chr16	77417486	77423470	UMR_22849|59|59|165|6054|0.027	0.014	.
chr16	77592841	77598934	UMR_22856|69|69|442|8183|0.054	0.012	.
chr16	77642595	77649473	UMR_22858|81|81|352|8230|0.043	0.011	.
chr16	81200088	81205566	UMR_22895|131|131|350|8053|0.043	0.022	.
chr16	85168820	85174607	UMR_22936|216|216|290|10955|0.026	0	.
chr16	90384123	90389930	UMR_23039|225|225|124|9495|0.013	0	.
chr16	91219159	91233956	UMR_23094|551|551|860|25350|0.034	0.009	.
chr16	92692897	92700769	UMR_23180|309|309|451|16948|0.027	0.004	.
chr16	94076835	94098476	UMR_23231|669|669|865|35650|0.024	0.006	.
chr16	94368404	94376250	UMR_23257|199|199|263|7484|0.035	0	.
chr16	94993203	94998312	UMR_23297|126|126|216|7297|0.030	0.007	.
chr16	95700081	95705576	UMR_23313|180|180|710|7817|0.091	0.007	.
chr16	97164305	97170320	UMR_23368|73|73|341|4696|0.073	0.014	.
chr17	3393223	3400953	UMR_23403|72|73|775|6195|0.125	0.046	.
chr17	4994849	5001525	UMR_23432|292|292|427|11367|0.038	0.01	.
chr17	5490295	5495643	UMR_23492|236|236|411|10394|0.040	0.005	.
chr17	6315768	6322734	UMR_23528|81|193|62|2326|0.027	0	.
chr17	6486969	6493101	UMR_23530|23|141|145|981|0.148	0.143	.
chr17	6959933	6979786	UMR_23547|97|353|208|1863|0.112	0	.
chr17	8366823	8373048	UMR_23582|92|92|352|6366|0.055	0.008	.
chr17	8428141	8438922	UMR_23586|275|275|809|14390|0.056	0.01	.
chr17	8797663	8806009	UMR_23599|291|291|374|12649|0.030	0	.
chr17	15371669	15382550	UMR_23769|335|335|548|14960|0.037	0	.
chr17	15823787	15833093	UMR_23785|331|331|670|16754|0.040	0	.
chr17	23532389	23539180	UMR_23834|83|141|263|5125|0.051	0.012	.
chr17	23802593	23807984	UMR_23863|197|197|407|7700|0.053	0	.
chr17	24719233	24724610	UMR_23912|193|197|429|7971|0.054	0	.
chr17	26835154	26858210	UMR_24056|569|569|652|30657|0.021	0.006	.
chr17	26945809	26954479	UMR_24064|261|261|269|10122|0.027	0.013	.
chr17	27225785	27231863	UMR_24092|91|91|666|4951|0.135	0.087	.
chr17	28688379	28694503	UMR_24222|225|225|328|8618|0.038	0	.
chr17	29882841	29892118	UMR_24334|335|335|405|12113|0.033	0	.
chr17	34116205	34124086	UMR_24527|430|430|162|12793|0.013	0	.
chr17	34626405	34633230	UMR_24547|266|266|205|10761|0.019	0	.
chr17	35699659	35705314	UMR_24627|179|179|90|7174|0.013	0	.
chr17	35832647	35839485	UMR_24635|185|185|543|9930|0.055	0.008	.
chr17	36157411	36169364	UMR_24657|244|249|383|7592|0.050	0.009	.
chr17	37044798	37053972	UMR_24682|286|286|514|13431|0.038	0.007	.
chr17	44732575	44740178	UMR_24741|311|311|232|14434|0.016	0	.
chr17	45541261	45546704	UMR_24761|185|185|596|6187|0.096	0.053	.
chr17	45547329	45552594	UMR_24762|143|143|390|5115|0.076	0.017	.
chr17	45593721	45600198	UMR_24770|154|154|479|6521|0.073	0.012	.
chr17	46028851	46033978	UMR_24792|261|261|177|9124|0.019	0	.
chr17	46855179	46861334	UMR_24843|254|254|656|12015|0.055	0	.
chr17	47138893	47145334	UMR_24854|224|224|265|11338|0.023	0.003	.
chr17	48094669	48101530	UMR_24930|248|255|297|12269|0.024	0.005	.
chr17	48406198	48411314	UMR_24934|185|185|179|9235|0.019	0	.
chr17	48970539	48977338	UMR_24952|79|79|518|4737|0.109	0.079	.
chr17	51809269	51816682	UMR_25037|218|218|802|10330|0.078	0.016	.
chr17	55444747	55450216	UMR_25051|136|136|337|7610|0.044	0.005	.
chr17	56466589	56476835	UMR_25108|378|378|608|14326|0.042	0.007	.
chr17	57058421	57063593	UMR_25147|224|224|352|8984|0.039	0	.
chr17	62878963	62884863	UMR_25186|372|372|188|16122|0.012	0	.
chr17	66445532	66452184	UMR_25305|320|320|321|11132|0.029	0	.
chr17	68835909	68842269	UMR_25349|253|253|538|9701|0.055	0	.
chr17	70520985	70526291	UMR_25396|42|42|305|4134|0.074	0.066	.
chr17	70846846	70854378	UMR_25432|291|291|146|15251|0.010	0	.
chr17	72817324	72822420	UMR_25481|31|31|340|2954|0.115	0.109	.
chr17	78198686	78204315	UMR_25535|242|243|222|9335|0.024	0	.
chr17	79352321	79357432	UMR_25574|203|203|339|9683|0.035	0	.
chr17	79710117	79716618	UMR_25578|240|240|535|11785|0.045	0	.
chr17	80939347	80948214	UMR_25642|200|203|868|10956|0.079	0.01	.
chr17	85484729	85490093	UMR_25780|137|137|366|9360|0.039	0.01	.
chr17	85612115	85626195	UMR_25785|560|560|481|27374|0.018	0.006	.
chr17	85679457	85687981	UMR_25790|300|300|310|14485|0.021	0.008	.
chr17	85688174	85693517	UMR_25791|218|218|234|9246|0.025	0.008	.
chr17	87435605	87448541	UMR_25895|292|292|657|16186|0.041	0.011	.
chr17	90450967	90457107	UMR_25965|136|136|244|7950|0.031	0.004	.
chr17	91089184	91095038	UMR_25973|57|57|258|4174|0.062	0.006	.
chr17	93196823	93206217	UMR_25975|198|198|383|13674|0.028	0	.
chr18	6487659	6493039	UMR_26009|209|209|773|8877|0.087	0	.
chr18	6512212	6517640	UMR_26010|107|107|65|7904|0.008	0	.
chr18	7000791	7007334	UMR_26013|252|252|170|13256|0.013	0	.
chr18	9210007	9217950	UMR_26028|301|301|121|11921|0.010	0	.
chr18	11046255	11061187	UMR_26045|490|490|543|26835|0.020	0.006	.
chr18	11838311	11845341	UMR_26051|264|264|813|10041|0.081	0	.
chr18	12858402	12863948	UMR_26079|91|91|106|4367|0.024	0	.
chr18	15059395	15067978	UMR_26129|353|353|446|15491|0.029	0	.
chr18	16710865	16715896	UMR_26153|41|41|653|4368|0.149	0.07	.
chr18	16802166	16811336	UMR_26157|291|291|281|12653|0.022	0	.
chr18	20740825	20746877	UMR_26171|206|206|865|9035|0.096	0.012	.
chr18	21650584	21655900	UMR_26186|177|177|171|7489|0.023	0	.
chr18	22342745	22349254	UMR_26193|232|232|553|11013|0.050	0.009	.
chr18	23035414	23043154	UMR_26197|200|200|132|9970|0.013	0	.
chr18	23801659	23808807	UMR_26212|149|149|492|10347|0.048	0.009	.
chr18	25629903	25635540	UMR_26281|67|67|471|3966|0.119	0.06	.
chr18	25658555	25664280	UMR_26287|58|58|437|3833|0.114	0.063	.
chr18	25743683	25758738	UMR_26296|286|287|865|16214|0.053	0.006	.
chr18	31444088	31449794	UMR_26313|59|59|144|5502|0.026	0.003	.
chr18	33443179	33448863	UMR_26346|57|57|642|5365|0.120	0.133	.
chr18	33459845	33465518	UMR_26350|151|151|88|7303|0.012	0	.
chr18	34858965	34864534	UMR_26409|267|268|351|9969|0.035	0	.
chr18	35209867	35216202	UMR_26421|74|74|85|6520|0.013	0.007	.
chr18	35828347	35843451	UMR_26457|391|391|886|13923|0.064	0.008	.
chr18	35870305	35875552	UMR_26462|120|120|380|4445|0.085	0	.
chr18	35916661	35921736	UMR_26467|184|184|371|6944|0.053	0.005	.
chr18	36192491	36198232	UMR_26488|168|168|286|7281|0.039	0.008	.
chr18	36279917	36289789	UMR_26489|382|382|484|14611|0.033	0	.
chr18	37176142	37182566	UMR_26518|58|58|389|4923|0.079	0.047	.
chr18	37818849	37826826	UMR_26526|161|161|441|7185|0.061	0.036	.
chr18	38144113	38149292	UMR_26554|95|95|193|3987|0.048	0.006	.
chr18	38208285	38215408	UMR_26567|265|265|186|9509|0.020	0	.
chr18	39483857	39492096	UMR_26617|354|354|628|13465|0.047	0	.
chr18	40255365	40262496	UMR_26623|105|105|419|7614|0.055	0.025	.
chr18	42392969	42403959	UMR_26638|331|332|527|19073|0.028	0.008	.
chr18	43389465	43395426	UMR_26683|126|126|87|6707|0.013	0	.
chr18	47364285	47371589	UMR_26774|259|259|177|13581|0.013	0	.
chr18	53244739	53250483	UMR_26824|142|142|516|6013|0.086	0.043	.
chr18	53460376	53474408	UMR_26828|478|479|523|24510|0.021	0.005	.
chr18	54120887	54127415	UMR_26846|101|102|478|8750|0.055	0.02	.
chr18	54530434	54536844	UMR_26860|70|70|715|6203|0.115	0.035	.
chr18	54908012	54913808	UMR_26879|59|60|421|4445|0.095	0.079	.
chr18	54982019	54993826	UMR_26886|209|210|425|16149|0.026	0.003	.
chr18	60605923	60611200	UMR_27007|77|77|439|4036|0.109	0.079	.
chr18	60619286	60628858	UMR_27009|195|195|598|8702|0.069	0.013	.
chr18	60921597	60931348	UMR_27050|144|145|522|7091|0.074	0.033	.
chr18	60946578	60952050	UMR_27055|77|77|361|4240|0.085	0.033	.
chr18	61554298	61560157	UMR_27089|184|185|608|10351|0.059	0	.
chr18	64329621	64348735	UMR_27151|591|591|657|32689|0.020	0.007	.
chr18	64886292	64891430	UMR_27169|211|211|315|8340|0.038	0	.
chr18	65021561	65026970	UMR_27182|74|74|363|5163|0.070	0.053	.
chr18	65934225	65942026	UMR_27243|246|246|347|13467|0.026	0.007	.
chr18	69343945	69352864	UMR_27369|230|230|294|14497|0.020	0.006	.
chr18	69498731	69508300	UMR_27386|164|164|991|13400|0.074	0.018	.
chr18	69515741	69528753	UMR_27388|212|212|1133|16625|0.068	0.032	.
chr18	69574525	69580797	UMR_27393|87|87|459|7623|0.060	0.01	.
chr18	69588671	69605126	UMR_27394|243|243|1163|19975|0.058	0.014	.
chr18	69606229	69614023	UMR_27395|119|119|657|9731|0.068	0.02	.
chr18	72346133	72351808	UMR_27438|130|130|179|8981|0.020	0.004	.
chr18	75365957	75375999	UMR_27537|425|425|499|16843|0.030	0	.
chr18	76842992	76861523	UMR_27620|564|564|666|26188|0.025	0.007	.
chr18	77558914	77566243	UMR_27655|255|255|390|13021|0.030	0.006	.
chr18	79105344	79111140	UMR_27716|240|240|306|9610|0.032	0.006	.
chr18	80806510	80813224	UMR_27761|51|51|648|4779|0.136	0.071	.
chr18	80979511	80986932	UMR_27765|268|268|765|14919|0.051	0.01	.
chr18	82908401	82919016	UMR_27845|445|446|513|20329|0.025	0	.
chr18	84085777	84092909	UMR_27889|340|340|454|15955|0.028	0.009	.
chr18	84718867	84724694	UMR_27905|144|144|365|8051|0.045	0	.
chr18	86710419	86715892	UMR_27918|159|159|259|9216|0.028	0	.
chr19	4752405	4757452	UMR_27996|116|120|661|6098|0.108	0.006	.
chr19	4988205	4994905	UMR_28011|154|154|417|7329|0.057	0.004	.
chr19	5048001	5053038	UMR_28018|101|101|446|4033|0.111	0.033	.
chr19	5093859	5099938	UMR_28027|156|156|115|5503|0.021	0.009	.
chr19	5455265	5461300	UMR_28037|191|191|259|8161|0.032	0	.
chr19	5487515	5492570	UMR_28041|225|225|162|9733|0.017	0	.
chr19	5792941	5804906	UMR_28068|213|213|114|14463|0.008	0	.
chr19	6415424	6423782	UMR_28115|184|184|424|7472|0.057	0.013	.
chr19	6425179	6430459	UMR_28116|210|210|242|7159|0.034	0	.
chr19	6494541	6504875	UMR_28122|272|272|364|9812|0.037	0.002	.
chr19	7264235	7270185	UMR_28203|221|221|283|6626|0.043	0.007	.
chr19	8661471	8667184	UMR_28225|106|106|176|5668|0.031	0.008	.
chr19	12003704	12014042	UMR_28332|281|281|386|21569|0.018	0.003	.
chr19	14239483	14244780	UMR_28349|49|49|477|4411|0.108	0.068	.
chr19	14594579	14599970	UMR_28357|285|285|646|13728|0.047	0.005	.
chr19	16238519	16244864	UMR_28389|48|48|716|4755|0.151	0.1	.
chr19	16867979	16880694	UMR_28404|421|421|884|21900|0.040	0.008	.
chr19	19106934	19112290	UMR_28419|119|119|482|7251|0.066	0.006	.
chr19	21271263	21276989	UMR_28429|222|222|456|8759|0.052	0.039	.
chr19	21775545	21790542	UMR_28441|246|246|1148|14704|0.078	0.013	.
chr19	23140118	23148098	UMR_28466|285|285|483|11673|0.041	0	.
chr19	23756355	23761798	UMR_28477|201|201|567|9651|0.059	0.014	.
chr19	24896769	24903050	UMR_28528|252|252|230|13292|0.017	0	.
chr19	25605271	25614428	UMR_28560|356|356|710|17017|0.042	0.008	.
chr19	25665489	25676876	UMR_28562|304|304|400|18357|0.022	0.005	.
chr19	26603419	26610286	UMR_28569|311|311|126|13502|0.009	0	.
chr19	28002461	28013316	UMR_28596|204|204|610|10197|0.060	0	.
chr19	32753869	32763415	UMR_28729|311|311|229|14081|0.016	0	.
chr19	37171149	37178666	UMR_28783|182|182|132|10652|0.012	0	.
chr19	37432769	37438273	UMR_28790|275|275|575|12404|0.046	0.01	.
chr19	41011623	41016808	UMR_28876|61|61|633|4860|0.130	0.051	.
chr19	42253764	42259032	UMR_28954|118|118|380|4783|0.079	0	.
chr19	43383849	43389655	UMR_28999|153|153|187|10272|0.018	0	.
chr19	43520717	43525753	UMR_29012|141|141|338|8022|0.042	0.005	.
chr19	43595351	43617569	UMR_29018|674|674|1066|35522|0.030	0.009	.
chr19	44291825	44304094	UMR_29048|230|233|495|13074|0.038	0.009	.
chr19	44509599	44517541	UMR_29064|196|196|966|11295|0.086	0.034	.
chr19	44739933	44761582	UMR_29086|698|698|673|34733|0.019	0.005	.
chr19	45013768	45019268	UMR_29107|199|199|120|6015|0.020	0	.
chr19	45074032	45082400	UMR_29116|339|339|416|16410|0.025	0	.
chr19	45141726	45163908	UMR_29120|561|562|870|27896|0.031	0.008	.
chr19	45220421	45244855	UMR_29124|823|823|615|40963|0.015	0.006	.
chr19	45292939	45305268	UMR_29126|245|245|981|12263|0.080	0.012	.
chr19	45811755	45818357	UMR_29169|157|157|343|7626|0.045	0.012	.
chr19	46036926	46047172	UMR_29179|288|289|264|10637|0.025	0	.
chr19	46325105	46330392	UMR_29192|239|239|178|9224|0.019	0	.
chr19	46499277	46504988	UMR_29208|311|311|71|10993|0.006	0	.
chr19	46527523	46532872	UMR_29212|100|100|322|5850|0.055	0.019	.
chr19	47013089	47019674	UMR_29243|252|252|417|10527|0.040	0	.
chr19	53309554	53314774	UMR_29375|296|296|173|11787|0.015	0	.
chr19	53527397	53532574	UMR_29400|209|209|420|7596|0.055	0	.
chr19	55739751	55751110	UMR_29484|352|352|1159|18735|0.062	0.007	.
chr19	56720559	56731626	UMR_29549|402|402|1196|17738|0.067	0.011	.
chr19	57193461	57199910	UMR_29584|132|132|575|7713|0.075	0.024	.
chr19	59048641	59055450	UMR_29704|72|72|1284|6866|0.187	0.13	.
chr19	59162659	59174382	UMR_29714|385|385|765|18848|0.041	0.009	.
chr19	59190033	59196640	UMR_29715|137|137|225|8848|0.025	0.014	.
chr19	59341462	59346708	UMR_29719|229|229|137|6452|0.021	0	.
chr19	59453958	59471710	UMR_29726|560|560|813|32218|0.025	0.006	.
chr19	60144022	60149793	UMR_29741|82|82|682|6383|0.107	0.039	.
chr19	60463559	60469943	UMR_29746|134|134|437|6803|0.064	0.019	.
chr2	6545133	6550596	UMR_29897|68|68|481|5352|0.090	0.044	.
chr2	6703353	6708376	UMR_29911|45|45|409|4227|0.097	0.056	.
chr2	6720274	6728244	UMR_29913|73|73|570|5667|0.101	0.044	.
chr2	6788805	6797309	UMR_29919|65|65|612|6640|0.092	0.077	.
chr2	6824053	6831336	UMR_29923|53|53|610|6210|0.098	0.098	.
chr2	6848265	6857522	UMR_29925|44|50|499|4417|0.113	0.099	.
chr2	6860691	6872472	UMR_29926|168|168|500|12189|0.041	0.014	.
chr2	6872549	6886460	UMR_29927|184|184|686|14369|0.048	0.014	.
chr2	6910059	6915596	UMR_29931|52|54|388|4449|0.087	0.059	.
chr2	7085991	7091617	UMR_29943|53|53|688|5502|0.125	0.057	.
chr2	7219054	7227648	UMR_29948|62|62|1089|5643|0.193	0.125	.
chr2	7254657	7262856	UMR_29952|42|42|609|4343|0.140	0.136	.
chr2	7307777	7314912	UMR_29953|55|55|489|5140|0.095	0.068	.
chr2	7388561	7396906	UMR_29955|77|77|422|8258|0.051	0.017	.
chr2	9871129	9899738	UMR_29974|740|740|727|45021|0.016	0.007	.
chr2	10368134	10376766	UMR_29985|274|274|340|16597|0.020	0.005	.
chr2	13006691	13012452	UMR_30020|177|177|500|9166|0.055	0	.
chr2	13571921	13577562	UMR_30030|144|144|217|8592|0.025	0	.
chr2	16354665	16359884	UMR_30045|119|119|308|6477|0.048	0	.
chr2	18025196	18034668	UMR_30061|314|315|940|16922|0.056	0.005	.
chr2	18038884	18059542	UMR_30062|540|540|881|28919|0.030	0.007	.
chr2	18310491	18318302	UMR_30065|34|34|553|4921|0.112	0.092	.
chr2	18687447	18701032	UMR_30074|404|404|376|18394|0.020	0	.
chr2	19441665	19458028	UMR_30101|374|374|745|20746|0.036	0.006	.
chr2	19656283	19662404	UMR_30105|258|258|372|9392|0.040	0.012	.
chr2	20959329	20970404	UMR_30123|309|311|821|14369|0.057	0.005	.
chr2	22617872	22628418	UMR_30151|263|263|817|16609|0.049	0.01	.
chr2	24470803	24475824	UMR_30167|131|131|313|7424|0.042	0.014	.
chr2	25576639	25582830	UMR_30219|332|332|344|10297|0.033	0.017	.
chr2	25862333	25867554	UMR_30224|107|107|192|3710|0.052	0.01	.
chr2	26194345	26208626	UMR_30240|387|387|899|16708|0.054	0.015	.
chr2	28192596	28199012	UMR_30331|136|136|269|4737|0.057	0.013	.
chr2	28205919	28215453	UMR_30334|197|197|640|10042|0.064	0.027	.
chr2	28532525	28539537	UMR_30366|134|134|604|5291|0.114	0.023	.
chr2	28907259	28919966	UMR_30378|438|438|351|20790|0.017	0.009	.
chr2	29249177	29256000	UMR_30401|269|269|376|11904|0.032	0	.
chr2	29963157	29973078	UMR_30453|211|211|672|10195|0.066	0.004	.
chr2	30061433	30066968	UMR_30457|236|236|353|8407|0.042	0	.
chr2	30716391	30724054	UMR_30510|145|145|211|6492|0.033	0.008	.
chr2	31634625	31642528	UMR_30574|396|396|409|16866|0.024	0.006	.
chr2	31759464	31764578	UMR_30578|77|77|161|3820|0.042	0.02	.
chr2	33579451	33585584	UMR_30721|128|128|396|6236|0.064	0.011	.
chr2	33628387	33640632	UMR_30727|376|376|314|17330|0.018	0.004	.
chr2	33640757	33647306	UMR_30728|282|282|305|12108|0.025	0.009	.
chr2	36090451	36106931	UMR_30873|448|448|1139|22401|0.051	0.007	.
chr2	37515444	37522620	UMR_30887|45|45|419|4175|0.100	0.081	.
chr2	37814457	37819842	UMR_30900|45|45|439|2737|0.160	0.112	.
chr2	38136721	38146044	UMR_30908|54|54|771|6020|0.128	0.121	.
chr2	38336168	38360485	UMR_30911|678|678|1043|30418|0.034	0	.
chr2	43781745	43789570	UMR_30960|94|94|867|9405|0.092	0.046	.
chr2	43986062	43991395	UMR_30964|57|57|771|6897|0.112	0.078	.
chr2	44570025	44576222	UMR_30982|61|61|607|6911|0.088	0.041	.
chr2	45084959	45090144	UMR_30999|49|49|479|4538|0.106	0.093	.
chr2	45092457	45119007	UMR_31000|518|518|576|34449|0.017	0.007	.
chr2	48812570	48817728	UMR_31020|222|222|521|11350|0.046	0.007	.
chr2	49447767	49453536	UMR_31025|237|237|206|9329|0.022	0	.
chr2	49741117	49747184	UMR_31045|96|96|823|6281|0.131	0.081	.
chr2	51144167	51149835	UMR_31082|159|159|110|8712|0.013	0.004	.
chr2	52673569	52678742	UMR_31118|176|176|344|6710|0.051	0	.
chr2	52857137	52862330	UMR_31127|209|209|194|8805|0.022	0	.
chr2	54082114	54087120	UMR_31149|140|140|283|7006|0.040	0	.
chr2	55435003	55440281	UMR_31153|107|107|122|5741|0.021	0	.
chr2	57374005	57379223	UMR_31169|55|55|654|5240|0.125	0.092	.
chr2	59159229	59164426	UMR_31212|217|217|414|8462|0.049	0	.
chr2	61801543	61820166	UMR_31310|525|525|661|25985|0.025	0.006	.
chr2	62337285	62342597	UMR_31314|46|46|558|3437|0.162	0.096	.
chr2	62626079	62631105	UMR_31328|43|43|476|4581|0.104	0.046	.
chr2	63180438	63185589	UMR_31336|83|83|180|4799|0.038	0	.
chr2	65928954	65935043	UMR_31375|58|58|523|6443|0.081	0.014	.
chr2	68361773	68368428	UMR_31413|105|105|1055|8345|0.126	0.031	.
chr2	70470354	70478361	UMR_31484|360|360|440|15974|0.028	0	.
chr2	70557920	70570377	UMR_31486|453|453|829|25699|0.032	0.007	.
chr2	71524879	71548626	UMR_31539|849|849|1155|42986|0.027	0.009	.
chr2	73262721	73282475	UMR_31623|728|729|894|36273|0.025	0.004	.
chr2	73652085	73660628	UMR_31638|69|69|325|6038|0.054	0.012	.
chr2	73777995	73783060	UMR_31641|57|57|525|5318|0.099	0.026	.
chr2	74647363	74655764	UMR_31666|187|187|1016|13972|0.073	0.026	.
chr2	74655835	74705297	UMR_31667|1724|1724|2940|88437|0.033	0.009	.
chr2	74705529	74716320	UMR_31668|296|296|438|18311|0.024	0.01	.
chr2	74719511	74754226	UMR_31669|831|831|1163|46595|0.025	0.008	.
chr2	78868124	78874592	UMR_31769|250|250|462|9980|0.046	0.014	.
chr2	79449409	79461480	UMR_31775|260|260|1009|16925|0.060	0.006	.
chr2	83811335	83816654	UMR_31811|111|111|259|6739|0.038	0.004	.
chr2	84733408	84739994	UMR_31830|102|102|394|6310|0.062	0.017	.
chr2	84881526	84890424	UMR_31842|294|294|246|12513|0.020	0	.
chr2	91928668	91934170	UMR_31921|147|147|342|6230|0.055	0.011	.
chr2	91971149	91976619	UMR_31929|150|150|526|5933|0.089	0	.
chr2	92055118	92061782	UMR_31935|237|237|493|13652|0.036	0.006	.
chr2	92181767	92187078	UMR_31937|216|216|483|9722|0.050	0.009	.
chr2	92387607	92393382	UMR_31948|136|136|266|4830|0.055	0	.
chr2	92429953	92435382	UMR_31956|167|167|132|7421|0.018	0	.
chr2	92598875	92605782	UMR_31968|180|180|522|6064|0.086	0.009	.
chr2	92912307	92918866	UMR_31985|101|101|393|5459|0.072	0.015	.
chr2	93638741	93649858	UMR_32026|343|343|443|16072|0.028	0.01	.
chr2	94239061	94247970	UMR_32049|278|278|168|14514|0.012	0	.
chr2	94262676	94267845	UMR_32050|82|82|49|5758|0.009	0.004	.
chr2	96314845	96320634	UMR_32063|66|66|342|5859|0.058	0.008	.
chr2	97465734	97479459	UMR_32064|138|138|963|12673|0.076	0.006	.
chr2	101965053	101970734	UMR_32085|52|52|622|3605|0.173	0.126	.
chr2	102448403	102453690	UMR_32130|230|230|121|6588|0.018	0	.
chr2	102655969	102664266	UMR_32136|186|186|491|10122|0.049	0.005	.
chr2	105120615	105135382	UMR_32195|482|482|516|25282|0.020	0.005	.
chr2	105659365	105664914	UMR_32209|150|150|705|10164|0.069	0.042	.
chr2	105666849	105684272	UMR_32210|590|590|824|30308|0.027	0.006	.
chr2	105685836	105691778	UMR_32211|162|162|416|11691|0.036	0.01	.
chr2	106081323	106086769	UMR_32218|55|55|1316|6770|0.194	0.103	.
chr2	106691077	106700545	UMR_32228|290|290|501|14367|0.035	0.006	.
chr2	106718717	106723969	UMR_32232|53|53|734|5328|0.138	0.098	.
chr2	109673251	109680472	UMR_32259|222|222|145|12633|0.011	0	.
chr2	109691157	109697866	UMR_32260|177|177|319|10645|0.030	0.003	.
chr2	115851917	115863173	UMR_32333|264|264|335|19497|0.017	0.007	.
chr2	116052015	116077220	UMR_32354|608|609|969|41381|0.023	0.005	.
chr2	116321735	116326784	UMR_32355|46|46|520|5186|0.100	0.031	.
chr2	117121395	117126840	UMR_32373|124|124|562|8815|0.064	0.012	.
chr2	117335161	117344216	UMR_32388|170|170|1127|9395|0.120	0.038	.
chr2	117385609	117391038	UMR_32390|55|55|448|4143|0.108	0.048	.
chr2	118544147	118550426	UMR_32414|157|157|355|8239|0.043	0.006	.
chr2	118699991	118707378	UMR_32423|293|293|297|11173|0.027	0	.
chr2	118895645	118904271	UMR_32445|395|395|342|13354|0.026	0.005	.
chr2	119321542	119328759	UMR_32467|315|315|264|12996|0.020	0	.
chr2	119740565	119745586	UMR_32479|246|246|169|7548|0.022	0.007	.
chr2	121292139	121298510	UMR_32520|88|88|251|4591|0.055	0.006	.
chr2	121801739	121808286	UMR_32545|170|170|413|7875|0.052	0	.
chr2	122294467	122303230	UMR_32554|257|271|415|12845|0.032	0.007	.
chr2	124608835	124614251	UMR_32577|175|175|573|8100|0.071	0	.
chr2	128122283	128128856	UMR_32638|385|385|174|15248|0.011	0	.
chr2	129592181	129598380	UMR_32696|180|180|330|7490|0.044	0.009	.
chr2	130449236	130454282	UMR_32729|149|149|252|6912|0.036	0.008	.
chr2	130576194	130582808	UMR_32738|205|205|500|8448|0.059	0.012	.
chr2	131909205	131914906	UMR_32788|91|91|259|5993|0.043	0.005	.
chr2	136711041	136721756	UMR_32881|156|156|238|11389|0.021	0.003	.
chr2	137112929	137117988	UMR_32895|282|282|137|11740|0.012	0	.
chr2	140666513	140672031	UMR_32918|86|86|160|7106|0.023	0.007	.
chr2	143544230	143550742	UMR_32941|160|160|206|8257|0.025	0	.
chr2	144329127	144335030	UMR_32957|244|244|128|9982|0.013	0	.
chr2	146214536	146222381	UMR_32999|307|307|336|13552|0.025	0	.
chr2	146833061	146840273	UMR_33019|242|242|279|14561|0.019	0.006	.
chr2	147177521	147196135	UMR_33025|656|656|375|34053|0.011	0	.
chr2	147359169	147365175	UMR_33027|136|136|355|8755|0.041	0.014	.
chr2	147365228	147375932	UMR_33028|239|245|283|13206|0.021	0.008	.
chr2	148028841	148054431	UMR_33031|604|604|1147|32930|0.035	0.005	.
chr2	148394811	148400752	UMR_33032|140|140|506|5839|0.087	0.007	.
chr2	149829322	149834782	UMR_33039|158|158|303|6909|0.044	0	.
chr2	151628078	151633228	UMR_33075|108|108|562|5281|0.106	0	.
chr2	152046701	152052455	UMR_33095|171|171|119|6800|0.018	0	.
chr2	152410611	152415656	UMR_33125|239|239|132|8811|0.015	0	.
chr2	156174648	156181614	UMR_33286|175|175|629|9351|0.067	0	.
chr2	156662685	156669942	UMR_33322|115|115|714|5932|0.120	0.038	.
chr2	156720281	156727207	UMR_33333|196|196|215|7658|0.028	0	.
chr2	156937421	156943768	UMR_33350|68|72|792|4626|0.171	0.102	.
chr2	157074068	157080002	UMR_33358|288|288|607|8449|0.072	0	.
chr2	158606325	158617344	UMR_33467|413|413|345|19282|0.018	0.008	.
chr2	160358755	160372478	UMR_33491|480|480|542|23247|0.023	0.008	.
chr2	160645417	160651738	UMR_33510|164|164|425|6408|0.066	0	.
chr2	162657295	162663442	UMR_33539|231|231|484|10570|0.046	0.011	.
chr2	164964157	164971736	UMR_33666|234|234|409|9875|0.041	0.006	.
chr2	165872969	165889358	UMR_33774|273|273|686|15498|0.044	0.015	.
chr2	167060353	167067520	UMR_33880|178|178|333|8020|0.042	0.006	.
chr2	168762001	168768000	UMR_34030|223|223|169|12444|0.014	0	.
chr2	170128486	170134892	UMR_34107|253|253|246|10843|0.023	0	.
chr2	170218193	170223476	UMR_34117|124|124|199|9116|0.022	0.004	.
chr2	170547329	170552497	UMR_34146|46|46|533|3677|0.145	0.147	.
chr2	172546749	172554886	UMR_34239|378|378|572|16576|0.035	0	.
chr2	174073432	174078954	UMR_34326|155|155|217|9453|0.023	0.006	.
chr2	175734707	175768252	UMR_34353|7|181|8|59|0.136	0	.
chr2	178294233	178299920	UMR_34371|52|52|483|4023|0.120	0.092	.
chr2	178326845	178332638	UMR_34373|56|56|425|3973|0.107	0.018	.
chr2	180888093	180898425	UMR_34517|389|389|300|14490|0.021	0	.
chr2	181762969	181769574	UMR_34566|56|56|98|3851|0.025	0.011	.
chr3	5214278	5228311	UMR_34573|199|199|1197|16441|0.073	0.008	.
chr3	8507957	8517654	UMR_34586|137|137|774|10986|0.070	0.005	.
chr3	10680829	10686898	UMR_34671|40|40|315|4284|0.074	0.063	.
chr3	13470359	13475382	UMR_34676|170|170|344|10945|0.031	0.002	.
chr3	17782064	17802808	UMR_34691|362|362|928|25105|0.037	0.006	.
chr3	18049331	18059866	UMR_34695|304|304|433|16780|0.026	0.005	.
chr3	18667841	18673043	UMR_34706|38|38|468|3534|0.132	0.092	.
chr3	30505349	30516302	UMR_34815|436|436|1011|24089|0.042	0.005	.
chr3	34641721	34669102	UMR_34896|790|790|1664|51602|0.032	0.006	.
chr3	38882995	38888576	UMR_34999|291|291|165|13651|0.012	0	.
chr3	45374699	45388188	UMR_35074|397|397|561|21822|0.026	0	.
chr3	52100751	52106511	UMR_35205|290|290|196|11783|0.017	0	.
chr3	55008191	55013500	UMR_35283|37|37|415|3625|0.114	0.04	.
chr3	55349697	55355460	UMR_35316|86|86|467|5877|0.079	0.057	.
chr3	55460661	55468282	UMR_35329|82|82|573|7329|0.078	0.034	.
chr3	55538767	55544442	UMR_35341|74|74|817|5531|0.148	0.121	.
chr3	55777619	55790473	UMR_35349|285|285|852|17605|0.048	0.013	.
chr3	58413931	58420339	UMR_35375|314|314|233|11331|0.021	0	.
chr3	61362665	61368296	UMR_35402|220|220|236|9206|0.026	0	.
chr3	63895753	63901350	UMR_35414|103|103|244|7767|0.031	0.005	.
chr3	66969841	66986517	UMR_35463|499|499|873|29599|0.029	0.007	.
chr3	68570057	68581890	UMR_35495|157|157|1045|11515|0.091	0.016	.
chr3	73052017	73058805	UMR_35553|143|143|133|8758|0.015	0	.
chr3	79282566	79288757	UMR_35576|236|236|569|9109|0.062	0	.
chr3	80079559	80084776	UMR_35611|51|51|582|6195|0.094	0.046	.
chr3	80792160	80804594	UMR_35618|173|173|380|11672|0.033	0	.
chr3	83976275	83981385	UMR_35658|34|34|210|2590|0.081	0.057	.
chr3	84213653	84221530	UMR_35673|115|115|451|8267|0.055	0.011	.
chr3	84300910	84306400	UMR_35684|119|119|341|7376|0.046	0.007	.
chr3	84951191	84967730	UMR_35705|124|124|1506|12322|0.122	0.065	.
chr3	86544677	86551672	UMR_35748|177|177|470|10536|0.045	0.01	.
chr3	87905765	87911152	UMR_35797|181|182|420|6395|0.066	0.01	.
chr3	87944831	87950570	UMR_35800|138|138|333|6366|0.052	0.018	.
chr3	87969525	87975160	UMR_35803|177|177|147|6329|0.023	0	.
chr3	87982333	87988591	UMR_35804|116|116|469|5465|0.086	0.021	.
chr3	87993259	88003010	UMR_35806|292|293|547|11277|0.049	0.011	.
chr3	88137493	88147356	UMR_35813|268|268|406|11201|0.036	0	.
chr3	88196958	88244580	UMR_35820|754|754|1782|37369|0.048	0.008	.
chr3	88619707	88625729	UMR_35863|182|182|141|7059|0.020	0	.
chr3	89390136	89397044	UMR_35917|256|256|118|9505|0.012	0	.
chr3	89417317	89422702	UMR_35919|143|143|350|7320|0.048	0	.
chr3	89959049	89964605	UMR_35959|181|181|295|7489|0.039	0	.
chr3	93442961	93448376	UMR_35987|347|355|170|15980|0.011	0	.
chr3	94476410	94483120	UMR_36004|93|93|278|4612|0.060	0.013	.
chr3	95225954	95231095	UMR_36033|145|145|76|6476|0.012	0	.
chr3	95902253	95907902	UMR_36058|108|108|269|6909|0.039	0.008	.
chr3	95992786	95998604	UMR_36066|181|181|221|7041|0.031	0.013	.
chr3	96347807	96357546	UMR_36090|24|175|14|315|0.044	0.044	.
chr3	96456589	96464540	UMR_36101|108|320|254|4637|0.055	0	.
chr3	96496603	96503928	UMR_36106|198|198|545|15570|0.035	0	.
chr3	96592083	96603633	UMR_36115|336|336|592|15406|0.038	0.004	.
chr3	99233373	99265260	UMR_36208|633|633|1641|41874|0.039	0.011	.
chr3	101592803	101605936	UMR_36263|272|272|967|15105|0.064	0.009	.
chr3	102008511	102014504	UMR_36280|173|173|389|10008|0.039	0.006	.
chr3	105703833	105709170	UMR_36377|106|106|180|5209|0.035	0.01	.
chr3	107034703	107042921	UMR_36396|206|206|378|9374|0.040	0.002	.
chr3	107455250	107460646	UMR_36417|243|243|169|6791|0.025	0	.
chr3	107579541	107585338	UMR_36433|133|133|385|7372|0.052	0.012	.
chr3	107594223	107600516	UMR_36434|240|240|553|10407|0.053	0.003	.
chr3	108282335	108289191	UMR_36478|222|222|482|10596|0.045	0.012	.
chr3	110139522	110144686	UMR_36545|164|164|194|9509|0.020	0.004	.
chr3	116248747	116254105	UMR_36565|178|178|518|7699|0.067	0	.
chr3	117356325	117361356	UMR_36594|71|71|177|3800|0.047	0.01	.
chr3	118425211	118447231	UMR_36600|294|294|2197|22219|0.099	0.008	.
chr3	121099883	121105402	UMR_36627|94|94|929|9665|0.096	0.063	.
chr3	121425091	121430220	UMR_36643|219|219|446|8916|0.050	0	.
chr3	122042694	122048963	UMR_36663|115|115|631|7543|0.084	0.023	.
chr3	122476031	122481766	UMR_36682|60|60|674|4227|0.159	0.104	.
chr3	127158474	127164908	UMR_36737|114|114|275|7761|0.035	0	.
chr3	127403577	127409420	UMR_36751|61|61|482|4568|0.106	0.026	.
chr3	127624836	127635614	UMR_36765|416|416|759|22047|0.034	0	.
chr3	129194115	129228212	UMR_36798|988|988|804|61771|0.013	0.005	.
chr3	129531933	129537004	UMR_36804|200|200|96|10259|0.009	0	.
chr3	131105463	131113608	UMR_36853|397|397|327|18970|0.017	0	.
chr3	133539542	133546246	UMR_36887|170|170|400|7026|0.057	0.002	.
chr3	134234955	134242066	UMR_36895|216|217|251|9623|0.026	0.006	.
chr3	136669021	136676823	UMR_36922|298|298|750|12230|0.061	0	.
chr3	136829687	136837552	UMR_36930|105|106|570|7368|0.077	0.049	.
chr3	136839767	136844783	UMR_36931|40|40|601|3918|0.153	0.13	.
chr3	137863469	137868952	UMR_36949|340|341|699|12481|0.056	0.01	.
chr3	138742332	138749888	UMR_36982|184|184|595|11051|0.054	0.008	.
chr3	141461351	141470059	UMR_37020|188|188|460|9751|0.047	0	.
chr3	144194577	144206620	UMR_37048|401|401|720|19974|0.036	0.007	.
chr3	145648201	145653902	UMR_37096|230|230|136|11464|0.012	0	.
chr3	146341235	146346504	UMR_37142|69|69|421|5944|0.071	0.023	.
chr3	147080203	147085728	UMR_37180|63|63|546|6791|0.080	0.057	.
chr3	148982169	148992342	UMR_37218|400|400|655|18588|0.035	0	.
chr3	152209092	152215428	UMR_37258|222|222|282|8677|0.032	0	.
chr3	154328625	154336508	UMR_37345|248|248|410|16564|0.025	0.008	.
chr3	156559219	156565384	UMR_37372|180|180|89|10175|0.009	0	.
chr3	158546759	158563266	UMR_37380|171|171|877|9991|0.088	0	.
chr4	6986433	6991914	UMR_37419|162|162|135|7518|0.018	0	.
chr4	9842726	9851506	UMR_37481|240|241|296|13688|0.022	0.005	.
chr4	11384379	11389924	UMR_37502|246|246|349|11682|0.030	0.006	.
chr4	11961888	11967246	UMR_37511|178|178|374|7692|0.049	0	.
chr4	13740827	13754206	UMR_37541|276|276|805|14377|0.056	0.004	.
chr4	13777735	13787884	UMR_37544|90|90|698|7918|0.088	0.027	.
chr4	17851811	17859058	UMR_37573|91|91|178|5827|0.031	0	.
chr4	21673722	21691716	UMR_37586|573|573|1264|27903|0.045	0	.
chr4	22476345	22499349	UMR_37603|655|655|1098|35605|0.031	0.004	.
chr4	23825319	23833457	UMR_37610|36|36|370|4237|0.087	0.076	.
chr4	24212945	24220538	UMR_37615|55|55|512|6244|0.082	0.028	.
chr4	25796131	25801216	UMR_37635|98|98|268|6412|0.042	0.004	.
chr4	26929399	26934970	UMR_37638|43|43|650|5554|0.117	0.051	.
chr4	28812053	28817643	UMR_37646|269|269|273|11135|0.025	0	.
chr4	32237655	32242734	UMR_37692|262|262|169|8149|0.021	0	.
chr4	33922715	33930368	UMR_37785|229|229|503|10066|0.050	0	.
chr4	36947071	36954659	UMR_37825|170|170|440|9895|0.044	0	.
chr4	41680921	41686948	UMR_37898|166|166|320|12097|0.026	0.01	.
chr4	42341277	42446016	UMR_37919|7|599|1|35|0.029	0	.
chr4	42642811	42705914	UMR_37921|13|1079|57|426|0.134	0.013	.
chr4	42917305	42922743	UMR_37927|94|94|460|4677|0.098	0.048	.
chr4	42943029	42954895	UMR_37931|239|239|594|11835|0.050	0.013	.
chr4	44246974	44253584	UMR_37994|89|89|757|6692|0.113	0.022	.
chr4	44701032	44706414	UMR_38006|245|245|363|10245|0.035	0.005	.
chr4	44710175	44717468	UMR_38007|236|236|314|14128|0.022	0.007	.
chr4	46038059	46043188	UMR_38078|135|135|291|5437|0.054	0	.
chr4	46337478	46349632	UMR_38088|491|491|1317|21220|0.062	0.017	.
chr4	48041304	48052622	UMR_38190|493|493|445|19380|0.023	0	.
chr4	53511555	53516808	UMR_38248|54|54|663|4341|0.153	0.057	.
chr4	54944261	54951970	UMR_38290|209|209|113|11893|0.010	0	.
chr4	57636283	57641304	UMR_38362|70|70|510|4909|0.104	0.024	.
chr4	68946602	68956806	UMR_38504|141|141|536|9380|0.057	0	.
chr4	70530234	70537440	UMR_38515|161|161|357|6793|0.053	0	.
chr4	72194990	72205328	UMR_38521|327|327|438|16311|0.027	0	.
chr4	81563413	81569232	UMR_38550|87|87|321|7855|0.041	0.02	.
chr4	82489821	82515220	UMR_38577|606|606|1453|36966|0.039	0.009	.
chr4	82531481	82544616	UMR_38578|189|189|863|12485|0.069	0.027	.
chr4	83484049	83489672	UMR_38629|180|180|614|9045|0.068	0.048	.
chr4	85204345	85212840	UMR_38656|151|152|817|8698|0.094	0.009	.
chr4	86574907	86580638	UMR_38670|114|114|127|6349|0.020	0	.
chr4	87650218	87655276	UMR_38701|39|39|545|3808|0.143	0.083	.
chr4	88028663	88036137	UMR_38712|310|310|295|14599|0.020	0.005	.
chr4	89270710	89284405	UMR_38732|266|266|452|18506|0.024	0.008	.
chr4	89285622	89311504	UMR_38733|473|473|1704|29394|0.058	0.011	.
chr4	91368594	91377358	UMR_38753|318|318|811|16553|0.049	0.003	.
chr4	95047936	95054882	UMR_38770|302|302|281|12091|0.023	0	.
chr4	97578695	97587196	UMR_38789|117|117|792|11369|0.070	0.019	.
chr4	97606126	97612018	UMR_38791|63|63|358|5412|0.066	0.021	.
chr4	97754587	97759774	UMR_38802|80|80|490|5381|0.091	0.006	.
chr4	97771051	97782432	UMR_38803|372|372|582|19477|0.030	0	.
chr4	97920149	97927939	UMR_38822|67|67|1047|6794|0.154	0.095	.
chr4	99649909	99663932	UMR_38876|685|686|886|34581|0.026	0.009	.
chr4	100775775	100781446	UMR_38890|213|213|466|10415|0.045	0.006	.
chr4	102588655	102594190	UMR_38945|54|54|150|5306|0.028	0.006	.
chr4	102758740	102764308	UMR_38947|104|104|415|6703|0.062	0	.
chr4	108830619	108835744	UMR_39182|140|140|189|7367|0.026	0	.
chr4	109858017	109863715	UMR_39207|37|37|441|4497|0.098	0.048	.
chr4	109974122	109988572	UMR_39208|686|686|1121|30658|0.037	0.004	.
chr4	114899367	114917299	UMR_39245|554|554|1091|29522|0.037	0.007	.
chr4	115052003	115064808	UMR_39251|381|381|424|18374|0.023	0.007	.
chr4	115933813	115945944	UMR_39273|342|342|539|16526|0.033	0.007	.
chr4	115961755	115967828	UMR_39276|135|135|448|6148|0.073	0.011	.
chr4	119811215	119817847	UMR_39462|98|98|377|5622|0.067	0.004	.
chr4	119965760	119971113	UMR_39477|68|68|348|3732|0.093	0.071	.
chr4	120259170	120264919	UMR_39492|64|64|293|3265|0.090	0.01	.
chr4	120280357	120287558	UMR_39497|203|203|323|6270|0.052	0	.
chr4	120745588	120750692	UMR_39512|220|220|384|7196|0.053	0.017	.
chr4	122881073	122887295	UMR_39537|115|115|284|6952|0.041	0	.
chr4	122994709	123000274	UMR_39543|205|205|151|7359|0.021	0	.
chr4	123012947	123018842	UMR_39546|86|88|364|5263|0.069	0.013	.
chr4	123524846	123530364	UMR_39566|59|59|406|4832|0.084	0.055	.
chr4	124983443	124989054	UMR_39674|195|196|376|7852|0.048	0.014	.
chr4	125483236	125495971	UMR_39722|386|386|958|17234|0.056	0.012	.
chr4	126253751	126261208	UMR_39778|213|213|468|7752|0.060	0	.
chr4	126463933	126469860	UMR_39790|139|139|378|6614|0.057	0.007	.
chr4	126731155	126736584	UMR_39805|241|241|237|8689|0.027	0.012	.
chr4	127020698	127026624	UMR_39817|198|198|168|8786|0.019	0	.
chr4	127167451	127175502	UMR_39821|227|227|172|7854|0.022	0.01	.
chr4	127985487	127990738	UMR_39848|211|211|99|7799|0.013	0	.
chr4	128732809	128738719	UMR_39893|77|77|448|4658|0.096	0.05	.
chr4	133008978	133018230	UMR_40201|264|264|459|9540|0.048	0	.
chr4	133019076	133025964	UMR_40202|107|108|457|5123|0.089	0.035	.
chr4	133041551	133049668	UMR_40206|131|131|600|5964|0.101	0.033	.
chr4	133092352	133101926	UMR_40213|84|285|180|3644|0.049	0.01	.
chr4	133493701	133499664	UMR_40251|207|207|505|7207|0.070	0.012	.
chr4	133750009	133758036	UMR_40270|437|437|195|12772|0.015	0	.
chr4	133966173	133972068	UMR_40281|231|231|375|7959|0.047	0.006	.
chr4	134015679	134021018	UMR_40286|152|152|218|7452|0.029	0.012	.
chr4	134249076	134258074	UMR_40297|270|271|673|12000|0.056	0.006	.
chr4	134465881	134473366	UMR_40318|215|215|384|10416|0.037	0.007	.
chr4	135146639	135159324	UMR_40382|442|442|470|19304|0.024	0.013	.
chr4	136245031	136250227	UMR_40463|165|165|521|8189|0.064	0.007	.
chr4	136281609	136286658	UMR_40464|109|109|230|6195|0.037	0.005	.
chr4	136833667	136838968	UMR_40510|260|260|637|9045|0.070	0.013	.
chr4	137352625	137358344	UMR_40546|151|151|233|5818|0.040	0	.
chr4	137381015	137389348	UMR_40550|94|177|308|5275|0.058	0.007	.
chr4	138452668	138465946	UMR_40637|402|402|926|17889|0.052	0.019	.
chr4	138688468	138693890	UMR_40661|70|70|311|5201|0.060	0.029	.
chr4	139817662	139838987	UMR_40749|646|646|1002|32853|0.030	0.009	.
chr4	140241723	140250552	UMR_40798|282|282|519|11381|0.046	0.005	.
chr4	142473655	142480928	UMR_41001|40|42|72|3108|0.023	0.015	.
chr4	148803434	148810378	UMR_41137|279|280|605|12032|0.050	0	.
chr4	149299587	149309055	UMR_41174|235|235|495|11945|0.041	0.01	.
chr4	150028807	150033856	UMR_41245|128|128|287|6186|0.046	0.005	.
chr4	151102865	151110040	UMR_41341|282|282|744|13002|0.057	0	.
chr4	154956985	154966131	UMR_41667|346|346|398|12140|0.033	0	.
chr4	155890637	155895762	UMR_41741|233|233|238|7644|0.031	0	.
chr4	156252481	156281322	UMR_41757|75|75|287|3381|0.085	0.013	.
chr5	3339441	3345662	UMR_41760|295|295|99|9561|0.010	0	.
chr5	9721959	9726962	UMR_41838|77|77|149|5147|0.029	0.005	.
chr5	13397156	13404514	UMR_41842|84|84|292|7111|0.041	0.004	.
chr5	15931297	15941897	UMR_41856|224|224|495|11173|0.044	0	.
chr5	16234534	16240288	UMR_41864|38|38|480|3831|0.125	0.058	.
chr5	23413029	23421062	UMR_41938|123|123|439|9041|0.049	0.008	.
chr5	23430301	23438884	UMR_41939|244|244|57|10663|0.005	0	.
chr5	24422812	24429000	UMR_41983|230|230|330|8863|0.037	0.008	.
chr5	24600791	24607020	UMR_42007|225|225|400|8934|0.045	0	.
chr5	28116475	28125842	UMR_42069|184|184|454|12424|0.037	0.006	.
chr5	28156931	28165885	UMR_42070|233|233|179|11497|0.016	0.006	.
chr5	28166147	28180481	UMR_42071|362|362|491|19244|0.026	0.007	.
chr5	28457645	28470220	UMR_42074|495|495|496|20240|0.025	0	.
chr5	29467209	29490358	UMR_42078|591|592|1180|31517|0.037	0.006	.
chr5	30709424	30714986	UMR_42111|200|200|121|8727|0.014	0	.
chr5	31091593	31096706	UMR_42146|243|243|224|8728|0.026	0	.
chr5	32132257	32140338	UMR_42172|371|371|545|15205|0.036	0	.
chr5	32610215	32615656	UMR_42175|163|163|309|7125|0.043	0	.
chr5	33018007	33028322	UMR_42186|212|225|499|9207|0.054	0.015	.
chr5	33429463	33436706	UMR_42194|441|441|135|15110|0.009	0	.
chr5	35375749	35402346	UMR_42267|726|728|940|29655|0.032	0.006	.
chr5	36887274	36895958	UMR_42325|99|99|321|5071|0.063	0.033	.
chr5	37239403	37249942	UMR_42359|332|332|474|12156|0.039	0	.
chr5	37255409	37263982	UMR_42361|60|60|682|4250|0.160	0.123	.
chr5	37816801	37833246	UMR_42373|573|573|497|30762|0.016	0.006	.
chr5	38061190	38067287	UMR_42382|35|35|335|3486|0.096	0.083	.
chr5	39636991	39645818	UMR_42415|167|167|579|10347|0.056	0.006	.
chr5	41751013	41768984	UMR_42421|510|510|467|30248|0.015	0.007	.
chr5	44794117	44801510	UMR_42456|69|69|548|6226|0.088	0.035	.
chr5	47980495	47987456	UMR_42476|232|232|342|11045|0.031	0	.
chr5	52111055	52117319	UMR_42502|327|327|133|13038|0.010	0	.
chr5	53210487	53216620	UMR_42558|181|181|338|7001|0.048	0.018	.
chr5	57713815	57724332	UMR_42583|444|444|189|21234|0.009	0	.
chr5	63647525	63653800	UMR_42594|139|139|150|6279|0.024	0	.
chr5	64801969	64808927	UMR_42635|268|268|306|10759|0.028	0	.
chr5	67093417	67103608	UMR_42753|323|323|362|22014|0.016	0.006	.
chr5	67214963	67224594	UMR_42757|194|194|1299|12224|0.106	0.015	.
chr5	67226583	67233889	UMR_42758|228|228|637|15133|0.042	0.009	.
chr5	67844057	67849660	UMR_42783|163|163|448|9514|0.047	0	.
chr5	71091613	71098218	UMR_42789|107|107|294|7431|0.040	0.004	.
chr5	73646807	73653514	UMR_42854|188|188|287|9331|0.031	0	.
chr5	75066727	75086808	UMR_42909|420|421|485|24804|0.020	0.008	.
chr5	75147816	75157464	UMR_42911|368|368|149|18293|0.008	0.005	.
chr5	81018791	81024776	UMR_43016|270|270|284|13190|0.022	0	.
chr5	84411850	84418825	UMR_43020|164|164|549|9271|0.059	0.007	.
chr5	88583058	88588892	UMR_43034|66|66|207|5477|0.038	0.015	.
chr5	93042789	93049457	UMR_43140|214|214|608|8205|0.074	0	.
chr5	98165571	98173554	UMR_43195|219|219|237|11869|0.020	0	.
chr5	98178851	98191280	UMR_43196|404|404|276|20165|0.014	0	.
chr5	99246481	99254296	UMR_43218|200|200|541|9882|0.055	0	.
chr5	99973975	99980070	UMR_43262|250|250|164|10441|0.016	0	.
chr5	100035887	100041512	UMR_43264|278|278|223|10280|0.022	0	.
chr5	101654207	101669864	UMR_43320|560|560|561|30444|0.018	0.005	.
chr5	104108362	104115413	UMR_43410|121|121|414|8807|0.047	0.012	.
chr5	105491424	105496808	UMR_43432|73|73|305|5142|0.059	0.027	.
chr5	106446209	106473234	UMR_43481|853|853|1206|50407|0.024	0.007	.
chr5	107496745	107501748	UMR_43518|37|37|231|4102|0.056	0.021	.
chr5	107717368	107727702	UMR_43521|398|398|760|16461|0.046	0.008	.
chr5	108364753	108371111	UMR_43538|293|293|344|10388|0.033	0.003	.
chr5	110543585	110548994	UMR_43584|168|168|695|6522|0.107	0	.
chr5	111053448	111059564	UMR_43619|108|108|498|7893|0.063	0.017	.
chr5	111413992	111436448	UMR_43656|745|745|998|31252|0.032	0.011	.
chr5	111747741	111752882	UMR_43696|76|76|734|5587|0.131	0.096	.
chr5	112573356	112578363	UMR_43800|166|166|96|7280|0.013	0	.
chr5	113306273	113311396	UMR_43896|136|136|347|5560|0.062	0.011	.
chr5	114566965	114573599	UMR_44006|252|255|159|8220|0.019	0	.
chr5	115190662	115195700	UMR_44058|226|226|294|7339|0.040	0.008	.
chr5	115429711	115440167	UMR_44089|306|306|652|10622|0.061	0.011	.
chr5	116586540	116593666	UMR_44201|182|182|488|9094|0.054	0	.
chr5	118170045	118175210	UMR_44308|173|173|212|8743|0.024	0.006	.
chr5	118565719	118572103	UMR_44363|81|81|894|6387|0.140	0.122	.
chr5	119656057	119689936	UMR_44414|854|854|1166|52135|0.022	0.007	.
chr5	119793397	119808938	UMR_44422|354|354|465|21847|0.021	0.008	.
chr5	119829007	119845806	UMR_44423|400|400|384|24122|0.016	0.005	.
chr5	120424003	120441074	UMR_44471|662|662|848|30801|0.028	0.007	.
chr5	121003522	121010710	UMR_44509|120|120|466|6203|0.075	0.005	.
chr5	121114021	121120634	UMR_44518|89|89|598|5761|0.104	0.062	.
chr5	122494190	122504054	UMR_44607|299|299|500|11996|0.042	0.016	.
chr5	123130914	123145284	UMR_44658|532|532|485|24020|0.020	0.003	.
chr5	124182075	124188528	UMR_44746|108|108|181|5618|0.032	0	.
chr5	124350677	124356379	UMR_44764|285|294|447|9927|0.045	0.021	.
chr5	125387785	125395160	UMR_44842|199|204|500|9776|0.051	0	.
chr5	128439715	128445363	UMR_44946|95|95|325|5988|0.054	0.024	.
chr5	128596135	128604142	UMR_44955|297|297|287|13624|0.021	0	.
chr5	131530081	131539302	UMR_45099|269|269|591|14510|0.041	0.004	.
chr5	131793622	131799183	UMR_45123|51|51|320|3911|0.082	0.01	.
chr5	132264024	132269606	UMR_45163|42|42|644|3763|0.171	0.147	.
chr5	132540031	132546196	UMR_45184|265|265|141|10930|0.013	0	.
chr5	135930261	135935448	UMR_45343|130|130|207|7051|0.029	0	.
chr5	137027430	137033536	UMR_45389|322|322|168|13782|0.012	0	.
chr5	139535172	139559856	UMR_45506|934|934|626|49520|0.013	0.005	.
chr5	139906683	139913658	UMR_45536|362|362|246|11321|0.022	0.007	.
chr5	140578962	140584769	UMR_45565|60|60|381|2896|0.132	0.074	.
chr5	140605330	140612640	UMR_45567|280|280|361|9746|0.037	0	.
chr5	140659138	140664432	UMR_45571|81|81|490|3666|0.134	0.083	.
chr5	142809413	142825384	UMR_45670|649|649|483|31210|0.015	0	.
chr5	142901997	142907846	UMR_45679|212|212|227|8375|0.027	0	.
chr5	142959833	142965100	UMR_45685|241|241|95|8210|0.012	0	.
chr5	147185223	147194534	UMR_45884|372|372|255|19575|0.013	0.003	.
chr5	147266136	147279524	UMR_45889|290|290|488|17767|0.027	0.009	.
chr5	147298735	147318394	UMR_45892|555|555|448|28129|0.016	0.005	.
chr5	147721367	147727904	UMR_45911|253|253|445|13488|0.033	0.007	.
chr5	149298219	149317874	UMR_46011|80|81|825|5692|0.145	0.093	.
chr6	5379103	5384710	UMR_46136|113|113|346|8986|0.039	0.006	.
chr6	6846881	6882918	UMR_46170|827|827|1641|50757|0.032	0.008	.
chr6	8947934	8952964	UMR_46200|208|208|119|11682|0.010	0	.
chr6	12077246	12085260	UMR_46205|54|54|1212|5747|0.211	0.123	.
chr6	13832283	13840514	UMR_46224|128|128|355|9867|0.036	0.005	.
chr6	14897681	14902982	UMR_46228|213|213|442|10671|0.041	0	.
chr6	15182837	15189416	UMR_46229|73|73|320|7998|0.040	0.004	.
chr6	18420537	18426962	UMR_46272|59|59|742|5867|0.126	0.107	.
chr6	18510871	18518418	UMR_46276|153|153|686|8679|0.079	0.005	.
chr6	23242602	23254754	UMR_46309|385|385|1000|23499|0.043	0.01	.
chr6	28131743	28136967	UMR_46334|183|183|139|9027|0.015	0	.
chr6	28752161	28757760	UMR_46353|39|39|420|3049|0.138	0.033	.
chr6	29430771	29437166	UMR_46402|171|171|472|6206|0.076	0.017	.
chr6	30171114	30180874	UMR_46429|381|381|675|16316|0.041	0.007	.
chr6	30300092	30305438	UMR_46433|126|145|75|5250|0.014	0	.
chr6	30545645	30553954	UMR_46445|140|142|595|11246|0.053	0.016	.
chr6	31214731	31222440	UMR_46487|298|298|344|13110|0.026	0	.
chr6	32582468	32588860	UMR_46537|205|205|143|7923|0.018	0	.
chr6	36773875	36779402	UMR_46621|49|49|264|4829|0.055	0.025	.
chr6	37295931	37301116	UMR_46654|129|129|97|5993|0.016	0	.
chr6	39869843	39877204	UMR_46749|242|242|218|10293|0.021	0	.
chr6	41603513	41610316	UMR_46776|131|131|353|6843|0.052	0	.
chr6	47680805	47740759	UMR_46814|40|416|62|699|0.089	0	.
chr6	47778212	47783232	UMR_46816|78|84|400|6547|0.061	0.003	.
chr6	49209196	49222360	UMR_46855|404|404|1047|23932|0.044	0.004	.
chr6	51169899	51185793	UMR_46918|362|363|1718|33852|0.051	0.017	.
chr6	51465912	51473132	UMR_46927|301|301|360|13792|0.026	0	.
chr6	51588113	51594028	UMR_46936|107|107|791|8049|0.098	0.015	.
chr6	51846665	51852855	UMR_46946|98|98|572|9158|0.062	0.02	.
chr6	52150084	52260376	UMR_46954|3121|3133|5479|173081|0.032	0.01	.
chr6	52260571	52277710	UMR_46955|343|346|773|19849|0.039	0.017	.
chr6	52309391	52324106	UMR_46958|415|416|428|22624|0.019	0.008	.
chr6	53286449	53295170	UMR_46986|208|210|309|13125|0.024	0.005	.
chr6	54562921	54570191	UMR_47062|129|131|546|8120|0.067	0.004	.
chr6	55450853	55456174	UMR_47096|124|127|272|4010|0.068	0	.
chr6	55675852	55685586	UMR_47109|135|143|318|10065|0.032	0.011	.
chr6	55810622	55819220	UMR_47114|48|61|760|4220|0.180	0.137	.
chr6	58834090	58839320	UMR_47137|42|42|589|3571|0.165	0.136	.
chr6	60824811	60830287	UMR_47152|60|60|122|3760|0.032	0.003	.
chr6	63255230	63260448	UMR_47162|200|200|194|9312|0.021	0	.
chr6	64727159	64735554	UMR_47168|266|266|313|16311|0.019	0.006	.
chr6	72096894	72102033	UMR_47240|141|141|325|5684|0.057	0	.
chr6	77239791	77251442	UMR_47317|205|205|568|11266|0.050	0.005	.
chr6	83067756	83073774	UMR_47350|284|285|323|10343|0.031	0.007	.
chr6	83082922	83088628	UMR_47352|142|142|384|5930|0.065	0.021	.
chr6	83437575	83445275	UMR_47387|145|146|185|6340|0.029	0.004	.
chr6	83692321	83722920	UMR_47394|563|566|1442|33996|0.042	0.01	.
chr6	83757846	83763538	UMR_47395|130|130|963|7478|0.129	0.02	.
chr6	84582847	84590732	UMR_47405|417|417|107|18907|0.006	0	.
chr6	85185463	85195529	UMR_47412|367|367|253|15825|0.016	0	.
chr6	85508633	85514276	UMR_47443|297|298|363|9319|0.039	0	.
chr6	86038421	86043833	UMR_47456|32|32|384|2756|0.139	0.125	.
chr6	86047871	86053793	UMR_47457|51|52|288|3310|0.087	0.031	.
chr6	86061807	86069531	UMR_47459|50|60|353|3593|0.098	0.048	.
chr6	86401003	86407256	UMR_47472|125|126|598|8888|0.067	0	.
chr6	86523103	86528418	UMR_47476|286|287|232|10173|0.023	0	.
chr6	86848215	86855353	UMR_47486|162|164|473|8498|0.056	0.007	.
chr6	88187899	88206752	UMR_47534|701|701|689|29880|0.023	0.008	.
chr6	88937851	88943614	UMR_47572|64|66|379|3632|0.104	0.043	.
chr6	90807539	90813420	UMR_47634|69|69|212|3268|0.065	0	.
chr6	90983081	90988429	UMR_47635|128|128|472|4849|0.097	0.036	.
chr6	91152523	91157949	UMR_47639|95|97|341|4598|0.074	0.009	.
chr6	91343988	91349518	UMR_47649|64|64|468|3443|0.136	0.11	.
chr6	91683287	91690398	UMR_47661|142|143|407|5316|0.077	0.01	.
chr6	92939831	92944959	UMR_47707|203|204|301|9879|0.030	0.005	.
chr6	96112107	96117514	UMR_47769|86|86|441|6477|0.068	0.023	.
chr6	99024375	99030290	UMR_47852|174|174|608|8618|0.071	0.014	.
chr6	99200433	99206764	UMR_47862|81|81|299|6518|0.046	0.016	.
chr6	99515963	99526192	UMR_47877|343|343|919|17443|0.053	0.005	.
chr6	101350131	101356834	UMR_47973|69|69|709|5429|0.131	0.084	.
chr6	103509430	103515816	UMR_47985|110|110|263|7626|0.034	0.005	.
chr6	107528981	107535466	UMR_48004|127|127|152|6942|0.022	0	.
chr6	108658289	108663907	UMR_48042|209|216|162|7924|0.020	0	.
chr6	110644509	110650664	UMR_48051|115|115|99|5239|0.019	0	.
chr6	113074333	113085022	UMR_48087|253|253|1066|11554|0.092	0	.
chr6	115122099	115127515	UMR_48196|38|38|467|2835|0.165	0.043	.
chr6	115671925	115677240	UMR_48209|153|153|297|6745|0.044	0	.
chr6	115989501	115994792	UMR_48224|219|221|443|7167|0.062	0	.
chr6	117165771	117171238	UMR_48243|181|181|211|8284|0.025	0	.
chr6	120488354	120494722	UMR_48358|257|257|327|9176|0.036	0.007	.
chr6	122337478	122342657	UMR_48411|174|174|556|8500|0.065	0.035	.
chr6	122764077	122770258	UMR_48428|121|121|544|7996|0.068	0.006	.
chr6	124914673	124921730	UMR_48465|251|251|699|11767|0.059	0.032	.
chr6	125095189	125100982	UMR_48479|176|176|388|6215|0.062	0.011	.
chr6	126161025	126168282	UMR_48514|204|207|245|10910|0.022	0.007	.
chr6	126731624	126738072	UMR_48529|58|58|651|4231|0.154	0.109	.
chr6	127147279	127156386	UMR_48550|340|340|116|16177|0.007	0	.
chr6	127765468	127771328	UMR_48577|242|246|115|9422|0.012	0	.
chr6	128797669	128803723	UMR_48623|136|156|358|6043|0.059	0	.
chr6	134919253	134930172	UMR_48679|359|367|620|18126|0.034	0	.
chr6	136157146	136174414	UMR_48741|251|261|652|16445|0.040	0.013	.
chr6	136546613	136554261	UMR_48759|54|62|685|6445|0.106	0.052	.
chr6	138419003	138428389	UMR_48831|137|138|332|10728|0.031	0.009	.
chr6	144200581	144211708	UMR_48990|174|174|786|14768|0.053	0.012	.
chr6	145045013	145051410	UMR_49044|149|158|647|7899|0.082	0.005	.
chr6	146955775	146962182	UMR_49124|59|59|433|4636|0.093	0.059	.
chr7	3301719	3306896	UMR_49200|136|136|427|7375|0.058	0.007	.
chr7	3388287	3393598	UMR_49204|69|69|328|5038|0.065	0.012	.
chr7	3703307	3708618	UMR_49223|114|115|479|7123|0.067	0.006	.
chr7	4116196	4125890	UMR_49224|154|154|518|7394|0.070	0.003	.
chr7	16097786	16106146	UMR_49347|139|139|562|5954|0.094	0.01	.
chr7	16128403	16133670	UMR_49352|100|100|135|4699|0.029	0.006	.
chr7	16308876	16314686	UMR_49365|312|312|54|8427|0.006	0	.
chr7	16398633	16406099	UMR_49367|264|264|251|12825|0.020	0	.
chr7	16610421	16615980	UMR_49375|227|227|166|7737|0.021	0	.
chr7	16917909	16925103	UMR_49401|212|212|233|8356|0.028	0	.
chr7	17057953	17063274	UMR_49421|101|101|384|5161|0.074	0.028	.
chr7	18920914	18925946	UMR_49427|103|103|95|4862|0.020	0.007	.
chr7	19175557	19181679	UMR_49456|226|226|396|10257|0.039	0.007	.
chr7	24480075	24488006	UMR_49560|215|215|696|8928|0.078	0.007	.
chr7	24504229	24509701	UMR_49563|167|167|368|7960|0.046	0	.
chr7	24930417	24935690	UMR_49581|112|112|175|6478|0.027	0.011	.
chr7	24942451	24951605	UMR_49583|248|248|438|11325|0.039	0.011	.
chr7	25001649	25012056	UMR_49589|290|290|346|11679|0.030	0	.
chr7	25068635	25074535	UMR_49594|112|112|130|4708|0.028	0.011	.
chr7	25246169	25252511	UMR_49609|265|265|96|7422|0.013	0	.
chr7	25276717	25284611	UMR_49612|316|316|166|8994|0.018	0	.
chr7	27256823	27262138	UMR_49651|147|147|188|4857|0.039	0.009	.
chr7	27363867	27369086	UMR_49665|166|166|503|7382|0.068	0.02	.
chr7	28807542	28813257	UMR_49761|256|256|129|11668|0.011	0	.
chr7	29303382	29310642	UMR_49811|275|275|158|9311|0.017	0	.
chr7	29314595	29320792	UMR_49813|124|124|513|6557|0.078	0.013	.
chr7	31048869	31054262	UMR_49912|150|152|65|7076|0.009	0	.
chr7	34650835	34656938	UMR_49937|323|326|294|10641|0.028	0	.
chr7	36690271	36701777	UMR_50032|454|454|410|19631|0.021	0	.
chr7	36706659	36712030	UMR_50033|87|87|366|5768|0.063	0.056	.
chr7	37599365	37604552	UMR_50076|63|63|705|5662|0.125	0.099	.
chr7	37767615	37774622	UMR_50089|338|339|239|17272|0.014	0	.
chr7	40897136	40903140	UMR_50125|258|258|445|10039|0.044	0.011	.
chr7	44334181	44340952	UMR_50159|186|186|314|5840|0.054	0	.
chr7	44350471	44361436	UMR_50162|422|422|362|16575|0.022	0.009	.
chr7	44441007	44448050	UMR_50169|139|139|335|5840|0.057	0.014	.
chr7	44586519	44594782	UMR_50183|332|332|299|14506|0.021	0.003	.
chr7	44601598	44607092	UMR_50184|146|146|316|6440|0.049	0.022	.
chr7	45161641	45169667	UMR_50233|206|206|574|9780|0.059	0.007	.
chr7	46395673	46401498	UMR_50345|266|267|444|8588|0.052	0.012	.
chr7	49245342	49252086	UMR_50427|234|234|242|9790|0.025	0	.
chr7	49387671	49393714	UMR_50456|70|70|770|5220|0.148	0.116	.
chr7	49631623	49641436	UMR_50487|319|319|237|20661|0.011	0.006	.
chr7	49906845	49917304	UMR_50504|288|288|357|16459|0.022	0.01	.
chr7	51621078	51633813	UMR_50512|197|197|471|14546|0.032	0.005	.
chr7	57383545	57390812	UMR_50540|119|119|464|6081|0.076	0.004	.
chr7	63206959	63212855	UMR_50550|109|109|376|4997|0.075	0	.
chr7	63933795	63940276	UMR_50565|382|382|321|11430|0.028	0	.
chr7	64500722	64506185	UMR_50584|182|182|267|5248|0.051	0	.
chr7	67949688	67955630	UMR_50724|392|392|117|14239|0.008	0	.
chr7	70278993	70290626	UMR_50785|215|215|483|13979|0.035	0.007	.
chr7	70323529	70361122	UMR_50786|884|884|1485|53318|0.028	0.007	.
chr7	70361357	70372460	UMR_50787|316|316|448|19087|0.023	0.007	.
chr7	73374231	73380312	UMR_50830|195|195|337|9443|0.036	0	.
chr7	73389063	73394840	UMR_50832|162|162|146|7380|0.020	0.004	.
chr7	73534752	73543248	UMR_50838|117|117|565|10154|0.056	0	.
chr7	73551497	73559693	UMR_50840|195|195|231|11758|0.020	0.003	.
chr7	73613753	73619667	UMR_50847|181|181|209|11154|0.019	0	.
chr7	75264155	75275176	UMR_50883|64|65|1091|5754|0.190	0.124	.
chr7	75304401	75310276	UMR_50888|98|98|169|5782|0.029	0.005	.
chr7	78575395	78582267	UMR_50913|218|218|395|9243|0.043	0	.
chr7	79495550	79527078	UMR_50965|742|742|598|32899|0.018	0	.
chr7	79530501	79550660	UMR_50966|403|403|1132|20784|0.054	0.007	.
chr7	79589422	79595462	UMR_50972|100|100|292|4699|0.062	0.013	.
chr7	81825395	81830412	UMR_51088|198|198|804|7906|0.102	0.049	.
chr7	82863361	82872703	UMR_51112|416|416|220|16147|0.014	0	.
chr7	91088843	91097069	UMR_51199|76|76|432|6826|0.063	0.003	.
chr7	92664967	92670866	UMR_51220|142|142|250|7104|0.035	0	.
chr7	96208738	96215290	UMR_51234|265|265|155|10976|0.014	0	.
chr7	98834250	98840080	UMR_51363|283|283|166|11562|0.014	0	.
chr7	99266931	99276477	UMR_51381|230|230|446|10441|0.043	0	.
chr7	99962491	99970097	UMR_51424|73|73|599|6009|0.100	0.039	.
chr7	101420785	101427616	UMR_51491|91|91|473|5229|0.090	0.054	.
chr7	101449535	101454860	UMR_51492|127|127|166|4830|0.034	0.006	.
chr7	101833991	101839002	UMR_51509|178|178|281|7570|0.037	0	.
chr7	105567979	105573354	UMR_51545|54|54|273|3300|0.083	0.014	.
chr7	109010391	109015400	UMR_51570|121|121|215|4543|0.047	0	.
chr7	110625962	110631004	UMR_51626|176|176|218|8421|0.026	0	.
chr7	112022515	112027567	UMR_51651|157|157|398|7699|0.052	0.002	.
chr7	112225330	112235150	UMR_51663|171|171|647|8155|0.079	0.012	.
chr7	113206081	113211259	UMR_51703|199|199|259|8121|0.032	0.005	.
chr7	113246330	113252044	UMR_51706|57|57|312|3671|0.085	0.024	.
chr7	116027125	116035772	UMR_51763|231|231|522|13884|0.038	0.004	.
chr7	117379903	117386828	UMR_51807|187|187|395|8058|0.049	0	.
chr7	118990189	118996722	UMR_51871|180|180|150|7825|0.019	0.007	.
chr7	121391143	121399278	UMR_51925|204|204|1040|8586|0.121	0.007	.
chr7	122669715	122675970	UMR_51987|104|104|505|6650|0.076	0.008	.
chr7	130260086	130267534	UMR_52219|265|265|521|13413|0.039	0	.
chr7	131539775	131558101	UMR_52266|705|705|537|35005|0.015	0.006	.
chr7	131966005	131971230	UMR_52282|129|129|119|4670|0.025	0	.
chr7	132596493	132604600	UMR_52323|224|224|759|11461|0.066	0.009	.
chr7	132763382	132768517	UMR_52335|54|54|549|4273|0.128	0.095	.
chr7	132805791	132814752	UMR_52341|252|252|366|10699|0.034	0	.
chr7	133069727	133075113	UMR_52350|68|68|495|4871|0.102	0.037	.
chr7	133119585	133125646	UMR_52354|381|381|237|14458|0.016	0	.
chr7	137307103	137313953	UMR_52484|315|315|552|14582|0.038	0.003	.
chr7	137314101	137323761	UMR_52485|527|527|481|23587|0.020	0.004	.
chr7	139580111	139586768	UMR_52532|363|363|399|14381|0.028	0.008	.
chr7	140056389	140063797	UMR_52555|160|160|476|7726|0.062	0.008	.
chr7	140077887	140083304	UMR_52556|110|110|355|6941|0.051	0	.
chr7	142657094	142665614	UMR_52652|350|350|303|12497|0.024	0	.
chr7	144202065	144207518	UMR_52687|44|44|398|2737|0.145	0.104	.
chr7	144233459	144242672	UMR_52689|108|109|512|6473|0.079	0.016	.
chr7	144283439	144288814	UMR_52693|101|101|358|4411|0.081	0.006	.
chr7	144937439	144943992	UMR_52724|343|343|113|15504|0.007	0	.
chr8	6603683	6609124	UMR_52774|36|36|370|4220|0.088	0.013	.
chr8	8484412	8490326	UMR_52786|91|91|568|7279|0.078	0.026	.
chr8	8646665	8663344	UMR_52798|429|429|730|22466|0.032	0.005	.
chr8	9766799	9773220	UMR_52825|181|181|530|9026|0.059	0.006	.
chr8	10999065	11004494	UMR_52893|53|53|232|3852|0.060	0.046	.
chr8	11475073	11480250	UMR_52914|166|166|329|8486|0.039	0.01	.
chr8	11554128	11559130	UMR_52917|370|370|212|11027|0.019	0	.
chr8	12382293	12388053	UMR_52958|246|246|529|11632|0.045	0.009	.
chr8	12393892	12403756	UMR_52960|484|484|506|20325|0.025	0	.
chr8	23409581	23416066	UMR_53180|219|219|244|10529|0.023	0	.
chr8	25189518	25201459	UMR_53222|227|227|1403|12440|0.113	0.025	.
chr8	26975796	26982341	UMR_53296|349|349|184|12035|0.015	0	.
chr8	34804159	34810780	UMR_53422|369|369|168|15831|0.011	0	.
chr8	44933644	44939968	UMR_53539|285|285|196|14477|0.014	0	.
chr8	46289185	46297970	UMR_53608|253|253|436|15095|0.029	0.007	.
chr8	47239465	47245564	UMR_53635|104|104|329|8251|0.040	0.008	.
chr8	47283114	47290212	UMR_53640|300|300|258|13259|0.019	0	.
chr8	47672225	47677716	UMR_53661|274|274|268|8006|0.033	0	.
chr8	48550913	48556662	UMR_53730|187|187|255|9991|0.026	0	.
chr8	48841834	48847376	UMR_53746|180|180|406|7496|0.054	0	.
chr8	54953084	54965386	UMR_53776|67|67|294|7800|0.038	0.011	.
chr8	57310964	57354467	UMR_53788|958|958|1718|62024|0.028	0.009	.
chr8	60628938	60635282	UMR_53818|169|169|398|8171|0.049	0	.
chr8	60949377	60955531	UMR_53824|43|43|314|4915|0.064	0.009	.
chr8	67808955	67819397	UMR_53904|70|70|648|6970|0.093	0.045	.
chr8	68878464	68883696	UMR_53919|119|119|375|7353|0.051	0	.
chr8	69088310	69094540	UMR_53923|113|113|405|6781|0.060	0	.
chr8	70486198	70496093	UMR_53996|456|456|316|16142|0.020	0.006	.
chr8	71568253	71573300	UMR_54082|134|134|310|5648|0.055	0	.
chr8	71664953	71673320	UMR_54093|213|213|457|9133|0.050	0	.
chr8	71683093	71694401	UMR_54096|401|401|748|16175|0.046	0.015	.
chr8	73349533	73356949	UMR_54129|225|225|120|9805|0.012	0	.
chr8	76896667	76903521	UMR_54142|268|268|291|10042|0.029	0	.
chr8	78425496	78439932	UMR_54183|359|359|1332|21478|0.062	0.005	.
chr8	83897119	83904325	UMR_54297|329|329|520|11241|0.046	0.01	.
chr8	83905148	83911140	UMR_54298|69|69|580|3698|0.157	0.148	.
chr8	84659677	84666004	UMR_54360|287|287|276|12815|0.022	0	.
chr8	84703699	84710257	UMR_54365|269|270|588|12002|0.049	0.034	.
chr8	84711267	84716976	UMR_54366|90|90|468|4331|0.108	0.089	.
chr8	84737455	84747168	UMR_54372|163|163|495|7651|0.065	0.035	.
chr8	84768752	84776716	UMR_54377|153|153|275|8840|0.031	0.014	.
chr8	84778203	84790924	UMR_54378|302|302|828|14989|0.055	0.025	.
chr8	84975393	84981446	UMR_54405|304|304|407|10893|0.037	0	.
chr8	85427708	85433688	UMR_54423|121|121|571|6661|0.086	0.006	.
chr8	87467772	87474458	UMR_54465|373|373|278|15535|0.018	0	.
chr8	87830025	87838210	UMR_54491|143|143|521|7980|0.065	0.03	.
chr8	87956975	87963400	UMR_54500|409|409|164|11901|0.014	0	.
chr8	89034657	89047762	UMR_54552|496|496|528|26271|0.020	0	.
chr8	90886211	90891923	UMR_54611|23|225|14|705|0.020	0	.
chr8	91797487	91808036	UMR_54660|516|516|713|23870|0.030	0	.
chr8	92353998	92367344	UMR_54687|672|672|712|31840|0.022	0.007	.
chr8	93809613	93817458	UMR_54718|313|313|478|13054|0.037	0.01	.
chr8	94265109	94270582	UMR_54751|46|46|181|5013|0.036	0.018	.
chr8	94770753	94777935	UMR_54767|107|107|499|5046|0.099	0.009	.
chr8	94992577	94998828	UMR_54784|83|83|286|4330|0.066	0.02	.
chr8	99412411	99418635	UMR_54848|163|163|325|8841|0.037	0	.
chr8	102779514	102787456	UMR_54866|221|221|186|12211|0.015	0	.
chr8	105266799	105272749	UMR_54920|239|239|257|8213|0.031	0.007	.
chr8	106268411	106273788	UMR_54979|50|50|350|2824|0.124	0.147	.
chr8	106332537	106339062	UMR_54985|157|157|617|8040|0.077	0.004	.
chr8	108694677	108703996	UMR_55075|218|218|446|14160|0.031	0.008	.
chr8	109247491	109252946	UMR_55115|110|110|181|9890|0.018	0.006	.
chr8	111535655	111540820	UMR_55213|200|200|67|6655|0.010	0	.
chr8	117256055	117262237	UMR_55409|270|270|469|9964|0.047	0.014	.
chr8	118283045	118288743	UMR_55469|139|139|336|6285|0.053	0.004	.
chr8	120484303	120491454	UMR_55622|309|309|255|11838|0.022	0	.
chr8	120508901	120514806	UMR_55627|116|116|353|5306|0.067	0.027	.
chr8	120530965	120540475	UMR_55634|419|419|485|12958|0.037	0	.
chr8	121070357	121091920	UMR_55662|738|738|664|32339|0.021	0.004	.
chr8	121113097	121129872	UMR_55665|682|682|617|29623|0.021	0	.
chr8	122928385	122933465	UMR_55801|33|33|183|2762|0.066	0.045	.
chr8	123409863	123417056	UMR_55824|138|138|245|7294|0.034	0.005	.
chr8	123608877	123625430	UMR_55834|110|852|185|2119|0.087	0.02	.
chr8	124428753	124434141	UMR_55910|117|117|278|5301|0.052	0.007	.
chr8	124791939	124797288	UMR_55931|287|287|431|10188|0.042	0	.
chr8	125897281	125903060	UMR_56001|87|87|341|5559|0.061	0.008	.
chr8	125994677	126000418	UMR_56009|129|129|250|6080|0.041	0	.
chr8	126582627	126593475	UMR_56036|342|342|633|15043|0.042	0	.
chr8	126659521	126669054	UMR_56043|146|146|549|8994|0.061	0.022	.
chr8	128356533	128363784	UMR_56085|214|215|260|9873|0.026	0	.
chr9	7999527	8005334	UMR_56113|230|230|639|10366|0.062	0	.
chr9	10901044	10906598	UMR_56124|63|63|501|4965|0.101	0.012	.
chr9	16498582	16504172	UMR_56191|194|194|114|9655|0.012	0	.
chr9	21029235	21038972	UMR_56234|416|416|579|16957|0.034	0.008	.
chr9	21163696	21169471	UMR_56242|226|226|227|7353|0.031	0	.
chr9	22046495	22052496	UMR_56303|230|230|301|7004|0.043	0	.
chr9	24768393	24783080	UMR_56359|351|351|814|22023|0.037	0.007	.
chr9	25250775	25256499	UMR_56370|192|202|306|8129|0.038	0	.
chr9	27298045	27308079	UMR_56402|223|223|436|9370|0.047	0.007	.
chr9	30137568	30143506	UMR_56464|52|52|727|3288|0.221	0.124	.
chr9	31911929	31917314	UMR_56508|223|223|187|10791|0.017	0	.
chr9	32221003	32229206	UMR_56522|53|53|409|5402|0.076	0.031	.
chr9	32539666	32551260	UMR_56532|306|306|421|16675|0.025	0.005	.
chr9	34485371	34491014	UMR_56556|151|151|158|7558|0.021	0	.
chr9	35420591	35432016	UMR_56594|228|231|638|13104|0.049	0.013	.
chr9	37139321	37148065	UMR_56637|249|252|389|11351|0.034	0	.
chr9	37430267	37435989	UMR_56652|137|137|298|7476|0.040	0.007	.
chr9	37451223	37463541	UMR_56654|213|217|761|12275|0.062	0.011	.
chr9	37526781	37532664	UMR_56656|148|148|432|6513|0.066	0.031	.
chr9	37549647	37559299	UMR_56660|111|111|666|6797|0.098	0.014	.
chr9	37612867	37617971	UMR_56663|78|78|321|5346|0.060	0.007	.
chr9	40403082	40408544	UMR_56695|55|61|776|4181|0.186	0.122	.
chr9	40636821	40643348	UMR_56714|68|70|814|4509|0.181	0.081	.
chr9	40803437	40809379	UMR_56727|68|70|477|5083|0.094	0.057	.
chr9	40871144	40880056	UMR_56732|293|301|446|17280|0.026	0.007	.
chr9	41373385	41380644	UMR_56762|92|102|299|6992|0.043	0.006	.
chr9	41575381	41590834	UMR_56766|175|183|352|15285|0.023	0.005	.
chr9	42121499	42126609	UMR_56802|155|159|556|6857|0.081	0.014	.
chr9	43742521	43748348	UMR_56871|257|258|263|9037|0.029	0	.
chr9	44082654	44090112	UMR_56895|196|196|275|8256|0.033	0	.
chr9	44481907	44491120	UMR_56924|214|222|310|7891|0.039	0	.
chr9	44877751	44883838	UMR_56951|259|265|163|9780|0.017	0	.
chr9	45133685	45139738	UMR_56964|128|133|352|5341|0.066	0.007	.
chr9	45428947	45434762	UMR_56974|177|180|216|8306|0.026	0.004	.
chr9	46011513	46016592	UMR_57018|169|173|292|7264|0.040	0.011	.
chr9	47529149	47535044	UMR_57074|292|294|351|12024|0.029	0	.
chr9	49794059	49800603	UMR_57193|190|190|216|9157|0.024	0	.
chr9	51763345	51768542	UMR_57237|200|200|149|7205|0.021	0	.
chr9	52675641	52680912	UMR_57251|128|128|216|7919|0.027	0	.
chr9	55538347	55550566	UMR_57323|454|454|790|22349|0.035	0.009	.
chr9	56501875	56508062	UMR_57343|107|108|529|7377|0.072	0.009	.
chr9	56624411	56638078	UMR_57349|308|309|704|11642|0.060	0.013	.
chr9	57070759	57077884	UMR_57397|355|355|146|15304|0.010	0	.
chr9	57500910	57506378	UMR_57411|185|187|194|9187|0.021	0.009	.
chr9	57761607	57766966	UMR_57433|233|233|238|8187|0.029	0	.
chr9	57937464	57942938	UMR_57448|174|175|143|5326|0.027	0	.
chr9	58110698	58115983	UMR_57470|76|76|192|4531|0.042	0.009	.
chr9	58194218	58206792	UMR_57478|411|411|541|19319|0.028	0.005	.
chr9	58437792	58443502	UMR_57489|72|72|390|4362|0.089	0.019	.
chr9	59032248	59039326	UMR_57502|243|247|591|10028|0.059	0.009	.
chr9	59655577	59660722	UMR_57524|158|158|104|8083|0.013	0	.
chr9	61368145	61379272	UMR_57603|422|424|220|17797|0.012	0	.
chr9	62339358	62347084	UMR_57665|360|369|273|14639|0.019	0	.
chr9	63131427	63153135	UMR_57713|896|896|638|41922|0.015	0.007	.
chr9	63754593	63759650	UMR_57747|220|222|104|9617|0.011	0	.
chr9	64016647	64023670	UMR_57766|366|366|251|12327|0.020	0	.
chr9	65823376	65828935	UMR_57847|149|149|525|6916|0.076	0.013	.
chr9	67039981	67050368	UMR_57896|292|292|532|14617|0.036	0.004	.
chr9	69754266	69773019	UMR_57953|527|527|460|34354|0.013	0.004	.
chr9	70651825	70658171	UMR_57982|163|163|378|6179|0.061	0	.
chr9	74846541	74869104	UMR_58058|705|705|717|39528|0.018	0.009	.
chr9	75049359	75055918	UMR_58069|44|44|660|4945|0.133	0.112	.
chr9	75070607	75075957	UMR_58070|157|157|175|5901|0.030	0	.
chr9	78476405	78483012	UMR_58152|178|179|135|6792|0.020	0	.
chr9	79716295	79721566	UMR_58167|184|184|275|9260|0.030	0.007	.
chr9	82972321	82977780	UMR_58193|272|272|234|11831|0.020	0.003	.
chr9	87726855	87741133	UMR_58268|473|473|939|29446|0.032	0.008	.
chr9	88479689	88484790	UMR_58279|261|277|275|8859|0.031	0	.
chr9	88519005	88524086	UMR_58280|114|114|104|5583|0.019	0	.
chr9	89867921	89872925	UMR_58293|49|49|329|3748|0.088	0.024	.
chr9	89907135	89912972	UMR_58297|212|212|257|9079|0.028	0	.
chr9	91360214	91368970	UMR_58312|347|347|1025|22596|0.045	0.007	.
chr9	91376883	91388624	UMR_58314|363|363|1159|21890|0.053	0.018	.
chr9	91403301	91410713	UMR_58317|107|107|833|10414|0.080	0.015	.
chr9	94532740	94540074	UMR_58335|291|291|208|11817|0.018	0	.
chr9	96725245	96734142	UMR_58397|146|146|732|12578|0.058	0.013	.
chr9	98951473	98966398	UMR_58450|533|533|608|25382|0.024	0.006	.
chr9	99867106	99880328	UMR_58488|461|461|484|24650|0.020	0.007	.
chr9	101072367	101078638	UMR_58509|288|288|176|12461|0.014	0.003	.
chr9	102714635	102720272	UMR_58558|176|176|434|8806|0.049	0	.
chr9	103757239	103762614	UMR_58616|163|163|372|8757|0.042	0	.
chr9	104569167	104574942	UMR_58637|76|76|577|5435|0.106	0.007	.
chr9	107629187	107636010	UMR_58792|182|182|540|7715|0.070	0.012	.
chr9	107934085	107940682	UMR_58818|130|130|402|5068|0.079	0.01	.
chr9	112091663	112097889	UMR_58991|31|34|408|2493|0.164	0.12	.
chr9	112099208	112109754	UMR_58992|87|87|822|7695|0.107	0.081	.
chr9	112114491	112127119	UMR_58995|146|149|1238|10586|0.117	0.055	.
chr9	112127488	112136549	UMR_58996|82|82|814|6409|0.127	0.121	.
chr9	112174104	112238962	UMR_59003|716|723|3153|58073|0.054	0.019	.
chr9	112722635	112727707	UMR_59008|36|36|397|3768|0.105	0.089	.
chr9	113811070	113816080	UMR_59051|44|44|187|4495|0.042	0.009	.
chr9	115305887	115311528	UMR_59125|250|250|183|10465|0.017	0	.
chr9	118475271	118481557	UMR_59197|272|272|326|13421|0.024	0	.
chr9	119979397	119985096	UMR_59285|191|191|169|6244|0.027	0.007	.
chr9	121311601	121317278	UMR_59391|82|82|442|5787|0.076	0.029	.
chr9	121490944	121496965	UMR_59414|125|125|348|7375|0.047	0.012	.
chr9	122567765	122576802	UMR_59474|310|310|509|13465|0.038	0	.
chr9	122592153	122598192	UMR_59477|89|89|890|6034|0.147	0.06	.
chr9	122609373	122615639	UMR_59480|77|77|582|5657|0.103	0.079	.
chr9	122659117	122667762	UMR_59489|25|102|154|1618|0.095	0.077	.
chr9	123897910	123926536	UMR_59518|161|169|82|5390|0.015	0.008	.
chr9	124416344	124426607	UMR_59521|303|304|80|10825|0.007	0	.
chrX	7638025	7645894	UMR_59547|143|143|320|4040|0.079	0.008	.
chrX	9198769	9204080	UMR_59596|157|157|66|3476|0.019	0	.
chrX	9240504	9245626	UMR_59597|46|47|192|2047|0.094	0.057	.
chrX	10714106	10721540	UMR_59615|189|189|250|5409|0.046	0	.
chrX	11998010	12009350	UMR_59676|405|407|302|9581|0.032	0	.
chrX	12065716	12075039	UMR_59680|173|173|318|5390|0.059	0.024	.
chrX	12076260	12083940	UMR_59681|484|496|225|8656|0.026	0	.
chrX	12085341	12092608	UMR_59682|440|457|160|7488|0.021	0	.
chrX	12155075	12160815	UMR_59689|278|278|163|4721|0.035	0	.
chrX	12586915	12592506	UMR_59705|112|112|363|3293|0.110	0.011	.
chrX	12758849	12764069	UMR_59709|175|175|118|5124|0.023	0	.
chrX	13069961	13075060	UMR_59722|246|246|114|4959|0.023	0	.
chrX	20793793	20799336	UMR_59764|51|51|203|1633|0.124	0.009	.
chrX	20913738	20922536	UMR_59769|125|129|162|2621|0.062	0	.
chrX	23692196	23697750	UMR_59780|106|106|234|3752|0.062	0	.
chrX	36192451	36198129	UMR_59784|81|81|162|2657|0.061	0.017	.
chrX	37046783	37053456	UMR_59808|174|174|391|4523|0.086	0.019	.
chrX	41399903	41407847	UMR_59833|119|119|196|4504|0.044	0.011	.
chrX	42148471	42153988	UMR_59837|256|257|72|7067|0.010	0	.
chrX	43425259	43431409	UMR_59846|138|138|103|4267|0.024	0	.
chrX	51677225	51684963	UMR_59902|197|204|177|3988|0.044	0	.
chrX	52742311	52754712	UMR_59922|145|145|650|6053|0.107	0.017	.
chrX	52911191	52916806	UMR_59926|142|142|148|5329|0.028	0	.
chrX	53606165	53612052	UMR_59934|52|62|81|1285|0.063	0	.
chrX	56729878	56734880	UMR_59951|143|151|153|3116|0.049	0	.
chrX	57915359	57924138	UMR_59970|218|218|692|8037|0.086	0.046	.
chrX	58027224	58034672	UMR_59973|271|271|365|7599|0.048	0	.
chrX	58117645	58122791	UMR_59975|35|35|311|2037|0.153	0.073	.
chrX	60887893	60897314	UMR_59996|438|438|314|9276|0.034	0	.
chrX	64272574	64279163	UMR_60003|147|147|148|3727|0.040	0	.
chrX	66647233	66654496	UMR_60004|107|107|94|3710|0.025	0	.
chrX	69359291	69364683	UMR_60010|121|121|99|3362|0.029	0	.
chrX	71048347	71055744	UMR_60017|186|186|135|4634|0.029	0	.
chrX	71660669	71666731	UMR_60024|170|170|122|4677|0.026	0	.
chrX	73963379	73969596	UMR_60062|176|176|52|4208|0.012	0	.
chrX	74243797	74250546	UMR_60068|146|155|205|2982|0.069	0	.
chrX	77507961	77513582	UMR_60105|180|193|48|3709|0.013	0	.
chrX	85046643	85052874	UMR_60114|89|89|165|3197|0.052	0	.
chrX	88108757	88117192	UMR_60120|72|72|173|4094|0.042	0.008	.
chrX	93279445	93302786	UMR_60127|614|615|433|19298|0.022	0	.
chrX	94540275	94546506	UMR_60152|166|174|175|4373|0.040	0	.
chrX	95155577	95167470	UMR_60161|114|114|338|5562|0.061	0.012	.
chrX	99134849	99150436	UMR_60177|336|336|319|7911|0.040	0	.
chrX	99819109	99825147	UMR_60214|276|276|259|4957|0.052	0	.
chrX	101298046	101305229	UMR_60238|122|124|118|2823|0.042	0	.
chrX	101636751	101644225	UMR_60251|144|144|303|5868|0.052	0	.
chrX	102249461	102254692	UMR_60274|271|271|63|5417|0.012	0	.
chrX	104197229	104202815	UMR_60306|253|256|187|4917|0.038	0	.
chrX	110810067	110817786	UMR_60345|174|174|107|6448|0.017	0	.
chrX	120288781	120294384	UMR_60356|150|151|47|4632|0.010	0	.
chrX	133652283	133660866	UMR_60368|57|57|345|3025|0.114	0.05	.
chrX	133680375	133693496	UMR_60370|372|384|281|9613|0.029	0	.
chrX	134295059	134300730	UMR_60377|65|65|114|2292|0.050	0	.
chrX	134403593	134409656	UMR_60379|70|70|201|2597|0.077	0.005	.
chrX	136030133	136035578	UMR_60406|27|83|93|1266|0.073	0.005	.
chrX	136270011	136276440	UMR_60416|58|130|451|2207|0.204	0.104	.
chrX	136737920	136743018	UMR_60428|124|124|79|4634|0.017	0	.
chrX	137096395	137128628	UMR_60436|559|693|738|18009|0.041	0.01	.
chrX	141717735	141730030	UMR_60463|288|288|442|8600|0.051	0	.
chrX	143663249	143668941	UMR_60487|63|63|274|2101|0.130	0	.
chrX	143901607	143907664	UMR_60492|31|31|136|1533|0.089	0.077	.
chrX	144684917	144690618	UMR_60502|107|108|253|3443|0.073	0	.
chrX	152129925	152135506	UMR_60530|36|36|248|1794|0.138	0.098	.
chrX	152144232	152149948	UMR_60532|124|130|48|2203|0.022	0	.
chrX	153496601	153503202	UMR_60556|191|191|96|5138|0.019	0	.
chrX	155620426	155627704	UMR_60565|199|220|131|4467|0.029	0	.
chrX	157729525	157735538	UMR_60574|44|44|91|2102|0.043	0.029	.
chrX	158018894	158044412	UMR_60579|276|276|800|8867|0.090	0.014	.
chrX	158918287	158926142	UMR_60584|78|78|66|3800|0.017	0	.
chrX	159253548	159260634	UMR_60585|219|224|213|5623|0.038	0	.
chrX	160990101	160996984	UMR_60618|156|156|121|5262|0.023	0	.
chrX	162758389	162763516	UMR_60647|214|215|108|4111|0.026	0	.
chrX	166214153	166220074	UMR_60673|43|43|166|1819|0.091	0.072	.
chrX	166236840	166242552	UMR_60675|128|128|253|3223|0.078	0	.
chrX	166343213	166357127	UMR_60686|101|101|284|5806|0.049	0.007	.
chrX	166802577	166809778	UMR_60700|40|40|130|2141|0.061	0.034	.
chrX	167203637	167210424	UMR_60705|136|136|367|5679|0.065	0.01	.
chrX	168116657	168125838	UMR_60710|99|99|233|3223|0.072	0	.
chrX	169879107	169884389	UMR_60721|93|93|129|4154|0.031	0	.
chrX	169921119	169926727	UMR_60724|34|34|353|1918|0.184	0.106	.

## Sheet: P0 Control, DMVs
chrom	start	end	name	score	strand
chr1	4489015	4499996	UMR_6|310|310|1303|49821|0.02615362999538347	0.00884324	.
chr1	5017820	5025703	UMR_17|243|243|1039|34825|0.029834888729361093	0.00777275	.
chr1	13123884	13130251	UMR_120|179|179|1558|26866|0.05799151343705799	0.0219608	.
chr1	19095949	19113510	UMR_203|266|266|1129|31923|0.03536635028036212	0.0130755	.
chr1	19204929	19245718	UMR_204|605|605|2410|73788|0.0326611373123001	0.0107822	.
chr1	23761124	23766355	UMR_289|187|187|401|27481|0.014591899858083767	0.00585162	.
chr1	24611504	24617044	UMR_330|77|81|3676|79507|0.04623492271120782	0.0404177	.
chr1	25826773	25832370	UMR_357|184|184|1338|19408|0.0689406430338005	0.00713523	.
chr1	38436097	38442236	UMR_603|66|66|1746|8818|0.19800408255840327	0.0792271	.
chr1	41151871	41158850	UMR_751|91|91|1661|11671|0.1423185673892554	0.0849498	.
chr1	41808787	41815489	UMR_776|71|71|1003|8308|0.12072701011073664	0.0582937	.
chr1	41887511	41892968	UMR_779|75|75|1010|10025|0.10074812967581047	0.0598553	.
chr1	42255634	42263200	UMR_792|102|102|1501|13473|0.11140800118756031	0.0360089	.
chr1	42538351	42544390	UMR_803|98|98|1393|13243|0.10518764630370762	0.0199556	.
chr1	42677101	42715184	UMR_811|984|984|2331|117263|0.019878393013994185	0.00653595	.
chr1	55886203	55891488	UMR_1041|83|83|1947|12092|0.16101554746940125	0.131056	.
chr1	56959891	56985286	UMR_1084|640|640|3975|86000|0.04622093023255814	0.0124745	.
chr1	59480255	59485898	UMR_1190|300|300|1246|43892|0.02838786111364258	0.00769084	.
chr1	62702544	62709226	UMR_1294|280|280|1110|38712|0.028673279603223807	0.00752517	.
chr1	63246655	63253889	UMR_1325|153|153|2974|21069|0.14115525179173194	0.0366937	.
chr1	63264555	63279399	UMR_1329|325|325|7529|40653|0.18520158413893192	0.041949	.
chr1	69684410	69689550	UMR_1464|172|173|666|16973|0.039238791021033406	0.00703042	.
chr1	72869863	72876580	UMR_1573|205|205|309|27959|0.011051897421223936	0.00580697	.
chr1	74768793	74777140	UMR_1637|211|211|1668|26031|0.06407744612193154	0.0116689	.
chr1	74787358	74808892	UMR_1639|445|445|3225|59825|0.053907229419139155	0.014306	.
chr1	74853957	74859959	UMR_1643|296|296|1135|37803|0.0300240721635849	0.00697053	.
chr1	74880587	74895452	UMR_1644|389|389|2468|55869|0.04417476597039503	0.0113734	.
chr1	74896395	74902614	UMR_1645|134|134|1476|17292|0.08535739070090215	0.0169892	.
chr1	74947757	74952899	UMR_1648|281|281|1296|44190|0.029327902240325866	0.0116021	.
chr1	75442699	75451137	UMR_1683|179|179|1248|21304|0.05858054825384904	0.0213244	.
chr1	77493821	77498995	UMR_1799|53|53|790|6725|0.11747211895910781	0.0811404	.
chr1	77501146	77508358	UMR_1800|114|114|2223|15370|0.14463240078074172	0.121391	.
chr1	77509623	77517452	UMR_1801|248|248|605|31865|0.018986348658402635	0.00605286	.
chr1	78138496	78144012	UMR_1830|79|79|768|9500|0.0808421052631579	0.0155854	.
chr1	78186857	78204630	UMR_1836|503|503|1771|62954|0.02813165168218064	0.0112202	.
chr1	78208148	78219970	UMR_1837|325|325|2811|45202|0.06218751382682182	0.0101096	.
chr1	82282491	82287492	UMR_1920|98|98|702|11003|0.06380078160501682	0.0112936	.
chr1	86500908	86506015	UMR_2038|139|139|978|20656|0.047347017815646784	0.00972017	.
chr1	86524593	86532765	UMR_2042|425|432|1001|59287|0.01688397119098622	0.00626323	.
chr1	87152350	87157532	UMR_2061|253|253|1599|40901|0.03909439866995917	0.0111047	.
chr1	87262229	87267367	UMR_2074|152|152|1012|22946|0.04410354745925216	0.00920219	.
chr1	89921081	89937429	UMR_2203|563|564|2735|83578|0.03272392256335399	0.0100003	.
chr1	106170879	106177399	UMR_2488|286|286|613|42299|0.014492068370410649	0.0058943	.
chr1	119047331	119055094	UMR_2572|271|272|872|34026|0.025627461353082935	0.00698316	.
chr1	119418281	119424572	UMR_2592|350|350|916|41754|0.02193801791445131	0.00680272	.
chr1	120340011	120345506	UMR_2631|217|217|1370|36316|0.03772441898887543	0.0108696	.
chr1	120590336	120618100	UMR_2640|679|679|3148|91412|0.034437491795387916	0.0113069	.
chr1	128589877	128596994	UMR_2811|203|203|1061|27952|0.037957927876359474	0.00769231	.
chr1	131523075	131529183	UMR_2882|252|252|467|34478|0.01354486919194849	0.00612296	.
chr1	133129323	133134627	UMR_3014|180|180|1746|29419|0.05934940004758829	0.00768511	.
chr1	134399878	134406713	UMR_3121|64|138|379|8704|0.04354319852941176	0.0072396	.
chr1	136228357	136235432	UMR_3246|156|156|1972|20109|0.09806554279178477	0.010846	.
chr1	136944450	136954658	UMR_3283|260|260|792|36669|0.021598625542010964	0.0100899	.
chr1	137897547	137904658	UMR_3312|83|83|477|9398|0.05075547988933816	0.00809346	.
chr1	138835124	138850170	UMR_3347|370|370|2874|47961|0.05992368799649715	0.019134	.
chr1	146493895	146499250	UMR_3401|88|88|839|12309|0.06816150783979202	0.0109315	.
chr1	151342337	151347594	UMR_3460|201|201|795|27171|0.029259136579441316	0.00549754	.
chr1	155082273	155087700	UMR_3663|159|159|1448|17999|0.08044891382854603	0.0124348	.
chr1	155727772	155745213	UMR_3710|455|455|1375|64027|0.02147531510144158	0.00748999	.
chr1	161033564	161040782	UMR_3884|141|141|551|16910|0.03258426966292135	0.00608585	.
chr1	166278609	166284712	UMR_4042|71|71|1296|10645|0.12174729920150305	0.103883	.
chr1	167687245	167696468	UMR_4109|300|300|1534|42447|0.0361391853370085	0.00858629	.
chr1	168422892	168432974	UMR_4173|170|170|600|18231|0.03291097581043278	0.00994465	.
chr1	171032493	171039228	UMR_4259|184|184|1313|22565|0.05818745845335697	0.0070922	.
chr1	171063744	171086431	UMR_4263|216|1058|2279|15778|0.1444416275827101	0.0332585	.
chr1	171246499	171252704	UMR_4277|126|126|1841|18487|0.09958349110185535	0.0408969	.
chr1	172024053	172029676	UMR_4307|143|143|600|15544|0.03860010293360782	0.0118497	.
chr1	172200479	172207720	UMR_4316|115|115|471|14656|0.032137008733624454	0.0104167	.
chr1	172481259	172487116	UMR_4346|136|136|2390|19527|0.1223946330721565	0.016205	.
chr1	172499465	172504668	UMR_4348|144|144|2803|19639|0.14272620805539996	0.0267842	.
chr1	177440235	177463544	UMR_4465|531|531|4837|61287|0.07892375218235514	0.0120783	.
chr1	184714271	184738790	UMR_4786|597|598|2253|80829|0.027873659206472924	0.0127226	.
chr1	187603155	187611048	UMR_4902|284|285|1049|40674|0.025790431233711955	0.0131456	.
chr1	190167719	190176380	UMR_5036|332|332|1018|40260|0.025285643318430202	0.0125251	.
chr1	192850823	192857308	UMR_5147|224|224|1425|30308|0.04701728916457701	0.0059973	.
chr10	9673701	9678738	UMR_5400|189|189|1105|29615|0.03731217288536215	0.0075188	.
chr10	9896989	9902520	UMR_5407|206|206|1073|30109|0.03563718489488193	0.00715039	.
chr10	13963709	13969955	UMR_5510|318|318|716|35160|0.020364050056882823	0.00595238	.
chr10	19351371	19364102	UMR_5628|272|272|1156|39091|0.02957202425110639	0.015843	.
chr10	22148210	22160422	UMR_5730|430|431|534|38140|0.014001048767697954	0.00643792	.
chr10	22811535	22823648	UMR_5748|250|250|1021|33710|0.030287748442598635	0.0115903	.
chr10	22838727	22845830	UMR_5749|87|87|1038|11600|0.08948275862068966	0.019194	.
chr10	29142557	29148914	UMR_5889|190|190|611|25740|0.023737373737373738	0.00654386	.
chr10	29532589	29539294	UMR_5896|139|139|838|17783|0.047123657425631224	0.00709599	.
chr10	37134496	37141926	UMR_5971|385|385|442|46868|0.009430741657420841	0.00578512	.
chr10	42273724	42279055	UMR_6126|394|394|1047|55557|0.018845510016739564	0.00578757	.
chr10	42577121	42593314	UMR_6147|533|533|2324|76876|0.03023050106665279	0.008082	.
chr10	42630426	42637762	UMR_6149|258|258|1028|31171|0.032979371852041965	0.0144674	.
chr10	43170559	43176023	UMR_6197|248|248|836|32187|0.025973219001460216	0.00744912	.
chr10	44525734	44531606	UMR_6260|142|142|508|18255|0.027827992330868256	0.00950078	.
chr10	44995744	45001194	UMR_6268|65|65|1404|7126|0.19702497895032275	0.0925361	.
chr10	45468001	45474300	UMR_6288|99|99|1345|11483|0.117129669946878	0.0355841	.
chr10	49781603	49789960	UMR_6318|142|142|1080|20067|0.05381970399162805	0.00696864	.
chr10	50889517	50912373	UMR_6324|527|527|2598|75436|0.03443979002067978	0.0118125	.
chr10	52020163	52030538	UMR_6341|239|239|1152|32431|0.035521568869291725	0.012308	.
chr10	56373138	56380468	UMR_6390|140|140|1373|16344|0.08400636319138521	0.0100261	.
chr10	59322353	59327536	UMR_6467|135|135|1040|16871|0.061644241598008416	0.00763359	.
chr10	59381887	59387518	UMR_6469|10|133|112|1180|0.09491525423728814	0.0640034	.
chr10	62127571	62138555	UMR_6684|264|264|1934|35274|0.054827918580257415	0.013791	.
chr10	63020822	63027157	UMR_6733|214|214|463|27983|0.016545759925669156	0.00613345	.
chr10	67534355	67541331	UMR_6873|333|333|2255|48340|0.046648738105088954	0.0078125	.
chr10	68274891	68283556	UMR_6918|249|249|1065|28181|0.03779141975089599	0.00774081	.
chr10	70094439	70099720	UMR_7012|241|241|867|27841|0.031141122804496966	0.00765905	.
chr10	73096321	73101466	UMR_7110|200|200|885|29574|0.029924934063704604	0.00747066	.
chr10	79611334	79616362	UMR_7327|157|159|2366|24152|0.09796290162305399	0.0250153	.
chr10	79852908	79858938	UMR_7354|228|228|1451|34373|0.04221336514124458	0.00631134	.
chr10	79916029	79922166	UMR_7366|234|234|1872|34506|0.05425143453312467	0.0220685	.
chr10	80147478	80153444	UMR_7392|304|304|507|34903|0.014525971979486005	0.00567346	.
chr10	80488243	80506674	UMR_7450|529|530|1796|71721|0.025041480180142496	0.0100829	.
chr10	80928454	80940364	UMR_7498|427|427|3090|61595|0.050166409611169735	0.00962963	.
chr10	81133909	81139022	UMR_7522|329|329|758|31500|0.024063492063492065	0.00750009	.
chr10	81172979	81178003	UMR_7524|182|182|1777|29246|0.06076044587293989	0.00726423	.
chr10	81568298	81576298	UMR_7597|185|185|2198|25037|0.08779007069537086	0.0127452	.
chr10	84435866	84442726	UMR_7712|223|223|1513|30196|0.050105974301231954	0.00929041	.
chr10	84754410	84760974	UMR_7727|316|316|2288|43582|0.0524987380111055	0.0111982	.
chr10	86777925	86783286	UMR_7808|151|151|1760|21915|0.08031028975587497	0.00945626	.
chr10	87484712	87495756	UMR_7840|317|317|1982|40367|0.04909951197760547	0.00794839	.
chr10	93160053	93167012	UMR_8051|223|223|735|23777|0.030912226100853767	0.00673401	.
chr10	94940140	94946471	UMR_8169|297|297|756|39517|0.019131006908419162	0.00815517	.
chr10	96615960	96621812	UMR_8262|195|196|550|22563|0.024376191109338297	0.00722138	.
chr10	99260791	99266748	UMR_8324|268|268|641|41550|0.01542719614921781	0.00590758	.
chr10	100015215	100020564	UMR_8360|153|153|709|22400|0.031651785714285716	0.00922821	.
chr10	103024863	103033298	UMR_8406|209|209|597|25445|0.023462369817252898	0.0107054	.
chr10	117147339	117152946	UMR_8763|202|202|1170|25137|0.04654493376297888	0.00800631	.
chr10	120471824	120479250	UMR_8937|320|320|639|38931|0.01641365492794945	0.00686636	.
chr10	126926547	126931937	UMR_9213|107|107|1700|14937|0.11381134096538796	0.0212842	.
chr10	127076091	127082459	UMR_9229|242|242|1658|24695|0.06713909698319498	0.0108165	.
chr10	127507713	127517314	UMR_9255|292|292|3346|41863|0.0799273821751905	0.0119357	.
chr10	127523915	127537280	UMR_9257|372|372|2198|46730|0.0470361652043655	0.0218076	.
chr10	127661102	127669509	UMR_9262|290|290|3719|37678|0.09870481448059876	0.0393052	.
chr11	3288181	3294358	UMR_9345|288|288|716|41980|0.017055740828966173	0.00592722	.
chr11	7211091	7216110	UMR_9552|210|210|1713|30111|0.05688950881737571	0.00951201	.
chr11	12033657	12040035	UMR_9634|282|282|1748|32018|0.05459429071147479	0.00943396	.
chr11	16256831	16262317	UMR_9653|131|131|1323|19575|0.06758620689655172	0.00733714	.
chr11	18868863	18880302	UMR_9697|306|307|777|34594|0.02246054229057062	0.00858406	.
chr11	19007395	19024180	UMR_9705|431|431|5984|60386|0.09909581691120459	0.0585833	.
chr11	21991167	22010080	UMR_9806|714|714|2634|101987|0.025826821065429908	0.0126065	.
chr11	24072029	24101517	UMR_9858|640|640|4818|76988|0.0625811814828285	0.00927636	.
chr11	25852701	25857716	UMR_9924|66|66|879|8548|0.1028310715956949	0.0544117	.
chr11	26582490	26587600	UMR_9941|39|39|1124|5496|0.20451237263464336	0.0883492	.
chr11	33192984	33206540	UMR_10079|545|545|2604|79926|0.0325801366263794	0.0103436	.
chr11	42419098	42426042	UMR_10375|107|107|1378|11017|0.1250794227103567	0.0133333	.
chr11	44610517	44622666	UMR_10442|338|338|1870|46383|0.04031649526766272	0.0098736	.
chr11	48852765	48859571	UMR_10563|214|214|644|32554|0.0197825152055047	0.00603296	.
chr11	51854833	51859898	UMR_10672|272|272|564|24413|0.02310244541842461	0.00641026	.
chr11	57826747	57841972	UMR_10914|400|400|3172|57980|0.054708520179372194	0.0206495	.
chr11	59287795	59293173	UMR_10976|215|215|1063|28548|0.03723553313717248	0.00989578	.
chr11	63916703	63925972	UMR_11173|431|431|1868|69147|0.027014910263641227	0.00990297	.
chr11	68382319	68387592	UMR_11338|327|327|698|46568|0.014988833533757087	0.00641026	.
chr11	69058648	69064594	UMR_11374|276|276|800|39810|0.02009545340366742	0.00640468	.
chr11	69094489	69100562	UMR_11379|184|184|1043|29253|0.03565446279014118	0.00790589	.
chr11	69117076	69126862	UMR_11381|373|373|1764|50144|0.035178685386088066	0.00742207	.
chr11	69364555	69372883	UMR_11400|280|280|1148|30443|0.03770981834904576	0.00749791	.
chr11	69394351	69400075	UMR_11401|262|266|4848|35504|0.13654799459215863	0.0922957	.
chr11	69413126	69422034	UMR_11404|233|233|1373|29179|0.0470543884300353	0.00998878	.
chr11	69799212	69806031	UMR_11435|276|276|1124|39946|0.02813798628148	0.00841751	.
chr11	69833637	69839333	UMR_11436|216|219|900|23784|0.037840565085771945	0.0086992	.
chr11	70017716	70024676	UMR_11454|140|140|1518|13843|0.10965831105974139	0.0097947	.
chr11	75164778	75174480	UMR_11638|621|621|2264|86511|0.026170082417264855	0.0102284	.
chr11	76382451	76389734	UMR_11736|91|91|2414|12356|0.19537067011977988	0.123278	.
chr11	77867110	77873403	UMR_11824|77|77|1962|10425|0.18820143884892088	0.0934154	.
chr11	77892397	77897879	UMR_11829|82|82|1258|11242|0.11190179683330369	0.0269254	.
chr11	77930315	77935606	UMR_11836|177|177|1257|25527|0.04924197908097309	0.00797884	.
chr11	83848600	83856717	UMR_12154|256|256|1180|35050|0.03366619115549215	0.0125326	.
chr11	84512802	84530738	UMR_12184|596|596|1965|90304|0.02175983345145287	0.0095019	.
chr11	85826994	85845334	UMR_12261|765|765|2714|114875|0.023625680087051144	0.0102316	.
chr11	85885479	85896978	UMR_12265|300|300|2046|45286|0.045179525681225984	0.0186543	.
chr11	88581510	88589357	UMR_12448|110|110|2617|15557|0.16822009384842837	0.105615	.
chr11	89297591	89304078	UMR_12499|341|341|426|36422|0.011696227554774587	0.00555556	.
chr11	93096610	93101630	UMR_12580|188|188|377|24593|0.015329565323466026	0.00823793	.
chr11	94471567	94476613	UMR_12638|196|196|1117|21736|0.0513894000736106	0.00706594	.
chr11	94988909	94994618	UMR_12671|255|255|1165|35754|0.032583766851261395	0.00611672	.
chr11	95118163	95125098	UMR_12689|248|248|2658|34100|0.07794721407624633	0.0109051	.
chr11	95140935	95146656	UMR_12692|195|195|1839|30409|0.0604755171166431	0.00982452	.
chr11	95410935	95416871	UMR_12716|115|115|1080|11554|0.09347412151635798	0.00877193	.
chr11	95829573	95835759	UMR_12748|202|202|2469|30885|0.07994171928120447	0.0358806	.
chr11	95911511	95917855	UMR_12754|140|140|1358|17236|0.07878858203759573	0.0110957	.
chr11	96001119	96009270	UMR_12758|337|337|726|34179|0.021241112964100764	0.00672736	.
chr11	96168187	96207140	UMR_12771|660|660|4801|91739|0.052333249762914355	0.017227	.
chr11	96250435	96357084	UMR_12774|2743|2745|7689|337079|0.02281067642896769	0.0123387	.
chr11	96362711	96376708	UMR_12775|199|199|2658|28014|0.09488113086313986	0.0335447	.
chr11	96872197	96877460	UMR_12825|108|108|1031|13345|0.0772573997751967	0.0170007	.
chr11	97017065	97023574	UMR_12848|261|261|1474|37536|0.039268968456947995	0.010509	.
chr11	97566523	97577246	UMR_12906|279|279|2735|30479|0.08973391515469667	0.011236	.
chr11	97626007	97632468	UMR_12914|312|312|1800|45226|0.03980011497810994	0.00833051	.
chr11	97659449	97665210	UMR_12916|307|307|709|28372|0.024989426194839983	0.00663366	.
chr11	98293989	98299394	UMR_12963|124|126|1482|14624|0.10134026258205689	0.0197468	.
chr11	98313154	98331064	UMR_12964|492|495|1737|63637|0.027295441331300973	0.0085249	.
chr11	98332984	98343191	UMR_12965|269|270|2875|32988|0.08715290408633443	0.0119091	.
chr11	98345093	98350910	UMR_12966|163|163|1086|20448|0.053110328638497656	0.014536	.
chr11	98739773	98744844	UMR_13004|180|180|486|16305|0.02980680772769089	0.00584975	.
chr11	98746082	98752227	UMR_13005|89|90|877|10621|0.08257226249882309	0.0157509	.
chr11	98927563	98933482	UMR_13029|103|103|2527|13882|0.18203428900734764	0.14556	.
chr11	98959201	98967091	UMR_13034|232|233|2616|30492|0.08579299488390398	0.0163598	.
chr11	101169040	101177556	UMR_13164|307|307|2086|43878|0.04754090888372305	0.00981152	.
chr11	101259305	101266510	UMR_13174|218|220|1250|28731|0.043507013330548884	0.0165533	.
chr11	102315299	102321046	UMR_13281|427|427|495|46417|0.01066419630738738	0.00632267	.
chr11	102444663	102449691	UMR_13294|156|156|972|19433|0.05001801060052488	0.0109527	.
chr11	102602417	102611944	UMR_13304|311|311|1384|38220|0.03621140763997907	0.00762999	.
chr11	103358430	103364580	UMR_13366|282|282|1710|43541|0.03927332858684918	0.0114418	.
chr11	103770225	103775854	UMR_13383|189|189|1139|29226|0.03897214808731951	0.0136212	.
chr11	104229715	104235524	UMR_13423|265|265|1224|39444|0.031031335564344387	0.00660955	.
chr11	104437543	104443466	UMR_13432|207|207|341|21211|0.016076564046956766	0.00628563	.
chr11	108919867	108925618	UMR_13644|309|309|795|33069|0.024040642293386556	0.00895217	.
chr11	112779505	112789008	UMR_13822|349|349|1099|43364|0.025343602988654183	0.00719373	.
chr11	114444263	114449524	UMR_14008|76|77|2036|10511|0.19370183617162973	0.0886825	.
chr11	115317316	115323713	UMR_14106|229|229|4567|33822|0.13503045355094317	0.0602143	.
chr11	115509997	115515041	UMR_14127|117|117|640|18332|0.03491162993672267	0.00691802	.
chr11	116917440	116922828	UMR_14250|205|205|1100|29075|0.037833190025795355	0.00989497	.
chr11	117962771	117970613	UMR_14378|309|309|2435|47285|0.05149624616686053	0.00716846	.
chr11	119039260	119060175	UMR_14478|787|787|3726|108312|0.034400620429869265	0.0113968	.
chr11	119082541	119092062	UMR_14481|460|460|1795|56004|0.03205128205128205	0.0118879	.
chr11	119545527	119551674	UMR_14524|300|300|1056|45489|0.02321440348216052	0.0066205	.
chr11	120184393	120190786	UMR_14573|299|299|1528|39449|0.038733554716215875	0.0102564	.
chr11	120228673	120243275	UMR_14577|689|689|3459|97984|0.035301681907250165	0.00652199	.
chr12	8296517	8303546	UMR_14810|330|330|2116|52550|0.04026641294005709	0.0121949	.
chr12	8495927	8501118	UMR_14826|208|208|1037|34071|0.03043644154853101	0.00562868	.
chr12	9569266	9585636	UMR_14851|364|364|1048|52689|0.019890299683045797	0.00834071	.
chr12	12935755	12943854	UMR_14937|319|319|1586|46060|0.03443334780720799	0.00658126	.
chr12	15810681	15817666	UMR_14989|245|245|647|32381|0.019980852969333867	0.00614766	.
chr12	16799715	16804982	UMR_15014|101|101|1005|10968|0.09163019693654267	0.00922277	.
chr12	25092090	25101692	UMR_15160|385|385|1012|49388|0.020490807483599254	0.0055559	.
chr12	27059919	27065868	UMR_15239|77|77|244|9941|0.024544814404989436	0.0135509	.
chr12	27333811	27344816	UMR_15251|456|456|949|57746|0.016434038721296715	0.00611621	.
chr12	29526030	29539576	UMR_15333|189|189|1973|24775|0.07963673057517659	0.0121319	.
chr12	33952781	33969546	UMR_15501|451|451|1157|56785|0.020375099057849785	0.00900149	.
chr12	49371546	49405454	UMR_15725|738|738|1346|89601|0.01502215377060524	0.00569529	.
chr12	50108466	50123708	UMR_15738|108|108|871|12405|0.07021362353889561	0.0292148	.
chr12	50190097	50195869	UMR_15741|34|34|256|4003|0.06395203597302024	0.0255431	.
chr12	50999415	51005216	UMR_15767|78|78|1033|10160|0.10167322834645669	0.0305208	.
chr12	53060648	53066052	UMR_15848|52|52|844|6428|0.13130056004978222	0.0870365	.
chr12	53246078	53255150	UMR_15854|370|370|1553|39758|0.03906132099200161	0.00753367	.
chr12	55123895	55239306	UMR_15954|31|1211|6|1092|0.005494505494505495	0.00505051	.
chr12	56518588	56541572	UMR_15999|626|628|3501|87436|0.04004071549476188	0.0107301	.
chr12	56607953	56618882	UMR_16002|211|211|1034|29688|0.034828887092427915	0.0096806	.
chr12	56685235	56702718	UMR_16007|466|466|1473|71485|0.020605721480030776	0.0112055	.
chr12	57533803	57555005	UMR_16033|674|674|2159|86703|0.024901099154585195	0.0106708	.
chr12	61520201	61527929	UMR_16077|177|177|834|23276|0.03583089877985908	0.00691992	.
chr12	70107863	70114128	UMR_16182|207|207|2857|30520|0.09361074705111402	0.0079808	.
chr12	72936113	72947930	UMR_16359|338|338|1459|44258|0.03296579149532288	0.0109607	.
chr12	73034551	73055891	UMR_16362|640|640|1557|90461|0.01721183714528913	0.00934948	.
chr12	76367017	76372304	UMR_16487|327|327|1075|43641|0.024632799431727047	0.00649351	.
chr12	80108505	80116784	UMR_16637|378|378|707|40054|0.017651170919259	0.00670276	.
chr12	81856089	81862978	UMR_16716|251|251|2758|29856|0.09237674169346195	0.00799808	.
chr12	83484451	83489685	UMR_16791|237|237|427|33424|0.01277525131641934	0.00721248	.
chr12	84568862	84573928	UMR_16844|186|186|1690|27764|0.060870191615041064	0.0344551	.
chr12	85471540	85476640	UMR_16904|221|221|1228|30508|0.0402517372492461	0.00695145	.
chr12	86879477	86886630	UMR_17012|328|334|751|43225|0.017374204742625795	0.00606061	.
chr12	86887470	86898804	UMR_17013|251|251|2497|30984|0.08058998192615544	0.00920776	.
chr12	95690656	95697808	UMR_17180|225|225|712|31130|0.022871827818824287	0.00667642	.
chr12	98571682	98578813	UMR_17227|191|191|1698|24860|0.06830249396621078	0.00698099	.
chr12	98733618	98739106	UMR_17237|173|173|1760|24292|0.07245183599538943	0.0088552	.
chr12	104468485	104479589	UMR_17492|393|393|1641|52221|0.0314241397139082	0.0091954	.
chr12	105957645	105963744	UMR_17592|144|144|1476|17337|0.08513583664993944	0.0137813	.
chr12	107969367	107982124	UMR_17735|317|317|7819|43477|0.1798422154242473	0.108743	.
chr12	107999929	108007659	UMR_17740|356|356|2127|42343|0.050232624046477575	0.00896678	.
chr12	108272192	108278831	UMR_17767|328|328|1205|47284|0.025484307588190508	0.00813876	.
chr12	109449139	109454800	UMR_17838|176|176|793|19527|0.04061043683105444	0.010117	.
chr12	110185497	110191106	UMR_17890|173|173|672|26712|0.025157232704402517	0.00793651	.
chr12	110276958	110284396	UMR_17898|391|391|1495|55084|0.02714036743882071	0.0125146	.
chr12	111427682	111434995	UMR_17960|134|134|3349|22050|0.15188208616780044	0.105614	.
chr12	111441735	111451230	UMR_17961|255|255|3967|40750|0.09734969325153374	0.0324609	.
chr12	117150424	117161388	UMR_18143|323|323|2368|47271|0.05009413805504432	0.0185313	.
chr12	118839490	118844564	UMR_18214|98|98|924|10650|0.0867605633802817	0.0189701	.
chr12	118846085	118856992	UMR_18215|388|388|1420|54389|0.026108220412215704	0.00597208	.
chr12	119234687	119240016	UMR_18219|91|91|449|14040|0.03198005698005698	0.00557774	.
chr13	15461581	15469589	UMR_18381|272|272|1376|34766|0.03957889892423632	0.008533	.
chr13	21166535	21173863	UMR_18485|184|184|1534|23535|0.0651795198640323	0.00977344	.
chr13	21778652	21788852	UMR_18519|235|285|1458|25030|0.058250099880143826	0.00739792	.
chr13	21993656	21999974	UMR_18539|125|125|828|16285|0.05084433527786306	0.0183079	.
chr13	23429906	23439269	UMR_18566|213|213|1875|26606|0.07047282567841841	0.00952922	.
chr13	23497315	23504329	UMR_18574|122|122|2164|15252|0.14188303173354314	0.0944516	.
chr13	23529894	23537084	UMR_18580|210|248|535|21932|0.024393580156848442	0.00477946	.
chr13	23570039	23577100	UMR_18585|181|270|412|14532|0.02835122488301679	0.0037037	.
chr13	23581007	23587291	UMR_18586|140|142|389|13070|0.029762815608263198	0.00526908	.
chr13	23750737	23758116	UMR_18596|129|169|931|10868|0.08566433566433566	0.00486618	.
chr13	28717549	28722977	UMR_18698|81|81|1331|11011|0.12087912087912088	0.0789552	.
chr13	28790245	28796004	UMR_18706|56|56|965|7316|0.1319026790595954	0.0818768	.
chr13	28881001	28887402	UMR_18715|136|136|2052|18475|0.11106901217861975	0.0267722	.
chr13	28946608	28954594	UMR_18717|318|318|772|45549|0.016948780434257613	0.00542422	.
chr13	31611757	31632884	UMR_18799|617|617|2019|87254|0.023139340316776308	0.0103451	.
chr13	31799741	31812186	UMR_18804|609|610|1938|85842|0.02257636122177955	0.00905213	.
chr13	34125465	34134730	UMR_18841|190|219|359|24736|0.014513260025873222	0.00747588	.
chr13	35737626	35743196	UMR_18886|272|272|1234|35257|0.03500014181580963	0.0069452	.
chr13	36721921	36737144	UMR_18914|438|438|2604|52142|0.04994054696789536	0.0100478	.
chr13	37824543	37832530	UMR_18948|294|294|1884|36704|0.051329555361813425	0.00740741	.
chr13	40701201	40717594	UMR_19022|364|364|1923|42744|0.04498877035373386	0.0114175	.
chr13	40722399	40745550	UMR_19024|792|792|2489|99289|0.025068235151930223	0.00871828	.
chr13	41352105	41360730	UMR_19055|137|137|1643|19441|0.08451211357440461	0.0125053	.
chr13	42048287	42054830	UMR_19085|289|289|676|31022|0.021790987041454452	0.00685128	.
chr13	44729341	44734656	UMR_19278|314|314|509|36553|0.013924985637293793	0.00515414	.
chr13	45960024	45967263	UMR_19352|298|298|977|31641|0.03087765873392118	0.00588329	.
chr13	48259299	48266682	UMR_19491|263|263|1381|38343|0.03601700440758417	0.00659443	.
chr13	48653089	48673334	UMR_19513|555|555|3138|77619|0.040428245661500405	0.0111783	.
chr13	51565436	51570877	UMR_19588|199|199|521|31439|0.01657177391138395	0.0053526	.
chr13	51844525	51849994	UMR_19612|251|251|469|36595|0.012815958464271075	0.00641026	.
chr13	52977747	52983270	UMR_19680|340|340|692|47145|0.01467812069148372	0.00570991	.
chr13	53281665	53286734	UMR_19708|177|177|2355|26192|0.08991295051924252	0.0119584	.
chr13	53461069	53477236	UMR_19715|437|437|2958|61876|0.04780528799534553	0.0110003	.
chr13	54754121	54760782	UMR_19804|139|139|2202|19561|0.11257093195644395	0.0093254	.
chr13	54947985	54953029	UMR_19835|215|215|1451|28308|0.05125759502614102	0.00641026	.
chr13	55468895	55475699	UMR_19867|276|276|2984|44194|0.06752047789292664	0.007884	.
chr13	55483346	55488640	UMR_19868|170|170|1051|17025|0.06173274596182085	0.00833333	.
chr13	55823358	55838236	UMR_19884|550|550|1784|79111|0.022550593469934647	0.010399	.
chr13	56248809	56261355	UMR_19925|370|370|2392|52433|0.045620124730608586	0.0117039	.
chr13	60172019	60179004	UMR_20209|334|334|653|53693|0.012161734304285474	0.0064197	.
chr13	63562275	63574818	UMR_20304|554|554|939|70936|0.013237284312619826	0.0060425	.
chr13	69734934	69741229	UMR_20425|279|279|1347|36769|0.036634121134651476	0.00674601	.
chr13	71956329	71969476	UMR_20511|455|455|1271|65908|0.019284457122048917	0.00848622	.
chr13	72621915	72640707	UMR_20535|616|616|2295|93628|0.02451189815012603	0.00940426	.
chr13	73257855	73273817	UMR_20561|507|507|2727|75229|0.03624931874675989	0.0122912	.
chr13	77889582	77894768	UMR_20635|35|35|569|4376|0.1300274223034735	0.0987473	.
chr13	78167237	78188384	UMR_20640|283|283|4121|35050|0.11757489300998573	0.0534243	.
chr13	78189337	78204486	UMR_20641|525|525|4314|55870|0.07721496330767853	0.00813008	.
chr13	80881709	80887173	UMR_20677|235|235|299|29855|0.010015072852118573	0.00540541	.
chr13	81627816	81633648	UMR_20687|74|74|1010|10810|0.09343200740055504	0.0181806	.
chr13	81942373	81947616	UMR_20700|70|70|1441|8368|0.1722036328871893	0.105486	.
chr13	83522577	83533046	UMR_20722|148|148|1960|16634|0.11783094865937237	0.0153655	.
chr13	83712513	83751134	UMR_20734|770|771|1211|94765|0.01277897958106896	0.00563296	.
chr13	83983961	83989470	UMR_20740|47|47|578|5957|0.0970287057243579	0.00587009	.
chr13	84054441	84069210	UMR_20743|106|106|367|12669|0.028968347935906545	0.0109588	.
chr13	84342568	84351148	UMR_20747|184|184|973|25228|0.03856825749167592	0.00684932	.
chr13	84747945	84764353	UMR_20755|112|112|674|12562|0.053653876771214776	0.027485	.
chr13	89737437	89743876	UMR_20786|175|175|646|24317|0.026565777028416334	0.00490196	.
chr13	94705941	94711806	UMR_20966|160|160|828|20462|0.040465252663473755	0.0127169	.
chr13	94866211	94886634	UMR_20970|685|685|2606|83645|0.03115547851037121	0.0098438	.
chr13	97237369	97245038	UMR_21064|233|233|1270|32217|0.03942018189154794	0.00806651	.
chr13	97248555	97254112	UMR_21066|80|80|1548|10609|0.14591384673390517	0.108158	.
chr13	98351147	98369544	UMR_21153|597|597|1353|78681|0.017196019369352195	0.00799606	.
chr13	98500406	98506767	UMR_21160|201|201|706|24001|0.029415441023290696	0.0105725	.
chr13	99441710	99448588	UMR_21197|99|99|1082|15410|0.07021414665801427	0.0263013	.
chr13	99510337	99517164	UMR_21207|194|194|1166|22591|0.05161347439245717	0.00613497	.
chr13	101690933	101696397	UMR_21284|124|124|1577|15811|0.099740686863576	0.0248874	.
chr13	103917157	103922726	UMR_21375|293|293|477|33801|0.014112008520457974	0.00609083	.
chr13	105442267	105449476	UMR_21425|133|133|1409|20009|0.07041831175970813	0.0136148	.
chr13	107886925	107892671	UMR_21494|455|456|624|56694|0.011006455709598899	0.00469484	.
chr13	112985451	112995138	UMR_21711|350|352|1506|53151|0.028334368121013715	0.00786196	.
chr13	114455795	114461053	UMR_21791|273|273|748|32306|0.023153593759673127	0.00630139	.
chr13	116292251	116315134	UMR_21834|454|454|1369|62502|0.02190329909442898	0.0113117	.
chr13	116704961	116712812	UMR_21841|190|190|671|22173|0.030262030397330088	0.0124766	.
chr13	119961729	119972182	UMR_21901|126|276|49|2656|0.018448795180722892	0	.
chr13	120010451	120018692	UMR_21904|73|81|1440|7798|0.18466273403436778	0.0629705	.
chr13	120023025	120050045	UMR_21905|251|656|448|13385|0.03347030257751214	0.00947963	.
chr13	120090246	120101198	UMR_21908|113|258|1292|6192|0.208656330749354	0	.
chr14	3527203	3657361	UMR_21912|40|895|91|423|0.21513002364066194	0.0477411	.
chr14	3796097	3811265	UMR_21913|20|149|19|257|0.07392996108949416	0.0836895	.
chr14	5444695	5472485	UMR_21926|28|233|6|372|0.016129032258064516	0	.
chr14	5797211	5819186	UMR_21927|23|202|6|238|0.025210084033613446	0	.
chr14	11551975	11557119	UMR_22033|270|270|796|41018|0.019406114388804914	0.0065398	.
chr14	12336391	12350588	UMR_22071|416|416|3110|56874|0.05468228012800225	0.0123201	.
chr14	12387947	12395226	UMR_22075|85|85|1822|11503|0.15839346257498044	0.0724888	.
chr14	14062839	14071818	UMR_22108|87|87|1541|11445|0.1346439493228484	0.0861175	.
chr14	21981277	21996434	UMR_22274|663|663|2791|92591|0.0301433184650776	0.00987654	.
chr14	24002721	24008732	UMR_22337|213|213|1603|26526|0.06043127497549574	0.00714286	.
chr14	25456512	25465526	UMR_22414|379|379|2055|52381|0.03923178251656135	0.00582409	.
chr14	25603756	25609790	UMR_22431|236|238|1212|25879|0.04683333977356158	0.00766431	.
chr14	25900997	25980084	UMR_22449|8|925|9|110|0.08181818181818182	0.113198	.
chr14	29717497	29723806	UMR_22558|254|254|831|32477|0.02558733873202574	0.00652359	.
chr14	32459780	32466304	UMR_22662|300|300|1503|45019|0.03338590372953642	0.0139424	.
chr14	34817689	34823835	UMR_22757|320|320|2111|41227|0.051204307856501804	0.00925766	.
chr14	39469755	39474946	UMR_22804|249|249|848|32042|0.026465264340553026	0.00696177	.
chr14	46384914	46391035	UMR_22868|273|273|652|34524|0.018885413045996988	0.00859227	.
chr14	46880882	46886174	UMR_22890|290|290|758|37956|0.01997049214880388	0.00682169	.
chr14	48118726	48124174	UMR_22941|207|207|538|24702|0.02177961298680269	0.00551303	.
chr14	48661215	48674956	UMR_22984|424|424|1596|55615|0.02869729389553178	0.0140454	.
chr14	51087443	51093716	UMR_23049|162|162|1166|22931|0.05084819676420566	0.00771463	.
chr14	52008842	52016062	UMR_23065|249|249|1903|23842|0.07981712943545005	0.0144994	.
chr14	52325781	52331910	UMR_23080|87|87|1092|10888|0.1002939015429831	0.026818	.
chr14	54571980	54578764	UMR_23120|270|270|881|38829|0.02268922712405676	0.00829985	.
chr14	55822173	55827249	UMR_23207|207|207|873|22558|0.038700239382924016	0.010101	.
chr14	58069730	58077143	UMR_23277|381|382|482|52758|0.0091360551954206	0.00717736	.
chr14	59624391	59629564	UMR_23311|183|183|1150|30268|0.037993920972644375	0.00701609	.
chr14	63239483	63257494	UMR_23482|517|517|2471|76850|0.03215354586857515	0.0104167	.
chr14	63260354	63272475	UMR_23483|225|225|1503|30798|0.04880187025131502	0.0124942	.
chr14	64580948	64596122	UMR_23571|368|368|3865|41117|0.09400004864168106	0.0148691	.
chr14	67227635	67240814	UMR_23696|449|449|2135|66708|0.03200515680278228	0.0104691	.
chr14	69167917	69178006	UMR_23770|204|204|1065|28872|0.036886949293433086	0.0126046	.
chr14	70073071	70082304	UMR_23803|466|466|1522|54702|0.027823479945888633	0.00718809	.
chr14	70622995	70629920	UMR_23842|125|125|3479|18629|0.18675183853132213	0.12366	.
chr14	75454539	75460916	UMR_23973|91|91|1209|11835|0.10215462610899874	0.0130328	.
chr14	79767401	79775187	UMR_24197|405|405|1651|68088|0.024248031958641756	0.00970504	.
chr14	80093385	80098564	UMR_24221|12|42|188|1458|0.1289437585733882	0.110865	.
chr14	84442143	84449346	UMR_24246|331|331|1355|49226|0.02752610409133385	0.00800416	.
chr14	98165965	98174862	UMR_24396|215|215|584|25383|0.023007524721270142	0.0070922	.
chr14	100281806	100287733	UMR_24448|214|214|796|24908|0.03195760398265617	0.00623004	.
chr14	104456347	104475026	UMR_24555|666|666|1259|88388|0.014244015024663981	0.00744672	.
chr14	105893273	105899860	UMR_24614|336|336|1708|39954|0.042749161535766134	0.00656159	.
chr14	108908439	108915011	UMR_24632|149|149|371|18417|0.020144431774990496	0.0110722	.
chr14	118225535	118239884	UMR_24752|538|538|2171|75823|0.02863247299632038	0.00741668	.
chr14	120273184	120278982	UMR_24854|95|95|1691|12916|0.13092288634252092	0.0143771	.
chr14	122449642	122456924	UMR_24960|174|174|1252|24351|0.051414726294608026	0.0137622	.
chr14	122458933	122466349	UMR_24961|300|308|1647|38728|0.04252737037802107	0.00795767	.
chr14	122468079	122483984	UMR_24962|601|601|5529|75145|0.07357774968394437	0.00963189	.
chr15	7809333	7817886	UMR_25066|352|352|1347|48814|0.02759454254926865	0.00769333	.
chr15	8441565	8447568	UMR_25075|269|269|497|28909|0.017191877961880382	0.00560224	.
chr15	11902975	11908566	UMR_25152|285|285|979|43896|0.022302715509385822	0.00743648	.
chr15	12115747	12121169	UMR_25164|190|190|650|19966|0.032555344084944406	0.00716929	.
chr15	25410171	25416866	UMR_25294|234|234|583|24472|0.02382314481856816	0.00572361	.
chr15	28021345	28026713	UMR_25408|312|312|1468|46069|0.0318652456098461	0.00633112	.
chr15	35291973	35305273	UMR_25552|410|410|1427|60813|0.02346537746863335	0.00980017	.
chr15	38469127	38474602	UMR_25678|184|184|3370|27121|0.12425795509015154	0.00967335	.
chr15	48788847	48794201	UMR_25801|133|133|642|17795|0.03607754987355999	0.00780101	.
chr15	53341942	53347622	UMR_25905|222|222|540|33308|0.01621232136423682	0.00505051	.
chr15	57692489	57698674	UMR_25975|246|246|826|30370|0.027197892657227527	0.00602584	.
chr15	59078265	59083289	UMR_26064|200|200|1065|31251|0.0340789094748968	0.00580844	.
chr15	61983046	61989364	UMR_26135|292|292|516|37726|0.013677569845729735	0.00511307	.
chr15	64917597	64923623	UMR_26215|218|218|1135|33948|0.03343348650877813	0.00781834	.
chr15	72544464	72550770	UMR_26331|266|267|1090|37263|0.029251536376566568	0.0118094	.
chr15	73182122	73187227	UMR_26363|252|252|1380|32124|0.042958535674262235	0.00537634	.
chr15	74513826	74520288	UMR_26433|352|352|1244|45078|0.02759661031988997	0.00879514	.
chr15	75743340	75749296	UMR_26475|334|334|1987|45500|0.04367032967032967	0.0106963	.
chr15	75996519	76004920	UMR_26497|333|333|4413|56505|0.07809928324926997	0.0319674	.
chr15	76516371	76524563	UMR_26543|457|457|2993|58954|0.05076839569834108	0.00943396	.
chr15	79502685	79507760	UMR_26752|212|212|2172|27011|0.08041168412868831	0.010256	.
chr15	81855911	81861116	UMR_26914|202|202|463|27828|0.01663791864309329	0.00481505	.
chr15	83779299	83785573	UMR_27039|227|227|1994|22434|0.08888294552910761	0.012228	.
chr15	84851013	84857382	UMR_27155|355|355|982|43203|0.02272990301599426	0.00608673	.
chr15	85460607	85465667	UMR_27183|52|52|705|7780|0.09061696658097686	0.062382	.
chr15	85575129	85583999	UMR_27197|434|434|1500|58010|0.025857610756766077	0.00782368	.
chr15	85652401	85657700	UMR_27205|90|90|1432|11043|0.12967490718101965	0.0236978	.
chr15	85666163	85682970	UMR_27207|493|493|3870|65556|0.059033498077979134	0.010101	.
chr15	92594256	92599834	UMR_27515|70|70|576|8776|0.06563354603463993	0.0112215	.
chr15	96283131	96289976	UMR_27726|485|485|512|53831|0.009511248165555163	0.00606111	.
chr15	97999842	98005802	UMR_27826|248|248|1935|34928|0.055399679340357305	0.00919455	.
chr15	98630313	98637640	UMR_27849|250|250|2148|28134|0.0763489016847942	0.00865918	.
chr15	98771379	98781439	UMR_27862|310|310|1837|44892|0.0409204312572396	0.0121306	.
chr15	98788783	98794998	UMR_27863|251|251|959|37900|0.025303430079155673	0.0111732	.
chr15	98801989	98809891	UMR_27865|288|288|1142|44424|0.0257068251395642	0.00969147	.
chr15	98868207	98873652	UMR_27868|191|191|976|22207|0.04395010582248841	0.00763359	.
chr15	98893115	98899208	UMR_27871|232|232|1025|37596|0.027263538674327056	0.0116255	.
chr15	98948979	98956316	UMR_27877|126|140|726|14940|0.048594377510040164	0.00837728	.
chr15	98983025	98988476	UMR_27880|105|105|1192|13433|0.088736693218194	0.0340923	.
chr15	99052736	99057896	UMR_27889|187|187|2142|27854|0.0769009837007252	0.0271765	.
chr15	99092981	99099644	UMR_27894|285|285|1351|36192|0.03732869142351901	0.0105698	.
chr15	99221211	99227866	UMR_27901|248|248|2825|36813|0.07673919539293185	0.0137366	.
chr15	102242535	102249909	UMR_28111|245|245|1820|26454|0.06879866938837227	0.0121951	.
chr15	102690761	102696428	UMR_28142|140|140|1252|17641|0.07097103338812992	0.0109962	.
chr15	102741755	102748273	UMR_28149|189|189|1426|28513|0.05001227510258478	0.00908778	.
chr15	102908741	103043904	UMR_28159|2748|2750|8898|354292|0.025114876994117845	0.012407	.
chr15	103054499	103062899	UMR_28161|147|148|1007|18740|0.053735325506937034	0.0159843	.
chr15	103165223	103173032	UMR_28174|195|195|2979|28295|0.10528361901396006	0.0257427	.
chr16	11982480	11987566	UMR_28465|198|198|735|26534|0.02770030903746137	0.00591252	.
chr16	13445277	13451710	UMR_28495|181|181|2446|21602|0.11323025645773539	0.0178571	.
chr16	17796409	17808074	UMR_28575|503|503|2327|78173|0.02976731096414363	0.0108946	.
chr16	18343341	18349425	UMR_28612|161|161|2101|23840|0.08812919463087249	0.00796041	.
chr16	18580047	18592904	UMR_28628|617|617|2681|98851|0.02712162749997471	0.010234	.
chr16	23223509	23228868	UMR_28783|146|146|948|20294|0.04671331428008278	0.00786565	.
chr16	23979963	23991680	UMR_28816|393|393|1357|47708|0.02844386685671166	0.00877193	.
chr16	27384909	27390195	UMR_28899|100|100|1208|11849|0.1019495316060427	0.0080008	.
chr16	30062552	30071240	UMR_28992|464|464|824|59419|0.013867618101953921	0.00611621	.
chr16	34570088	34575327	UMR_29260|230|231|415|26713|0.01553550705648935	0.00516936	.
chr16	38087063	38093404	UMR_29406|248|248|265|32032|0.008272977022977022	0.00455068	.
chr16	43502186	43507524	UMR_29538|73|73|722|8536|0.0845829428303655	0.0386496	.
chr16	44554469	44560488	UMR_29584|133|133|675|16636|0.040574657369559994	0.00797878	.
chr16	44660651	44667644	UMR_29594|72|72|1314|8154|0.16114790286975716	0.135275	.
chr16	46494260	46500136	UMR_29635|245|245|519|30149|0.01721450131015954	0.00569967	.
chr16	52448631	52455148	UMR_29764|194|194|568|27333|0.02078074122855157	0.00571365	.
chr16	74407465	74413695	UMR_30120|110|110|479|13170|0.036370539104024296	0.00774585	.
chr16	77235213	77241129	UMR_30198|62|62|336|8066|0.04165633523431689	0.00878812	.
chr16	77398641	77405471	UMR_30202|63|63|1096|8721|0.12567366127737645	0.0499591	.
chr16	77417265	77423330	UMR_30203|59|59|389|7070|0.05502121640735502	0.027171	.
chr16	77642943	77649820	UMR_30215|77|77|858|9444|0.09085133418043202	0.0565203	.
chr16	81200088	81205566	UMR_30271|131|131|1586|16647|0.09527242145731964	0.00996766	.
chr16	85168893	85174402	UMR_30320|212|212|1596|30855|0.05172581429265921	0.00629693	.
chr16	90384123	90389930	UMR_30465|225|225|768|31714|0.02421643438229173	0.00628931	.
chr16	91219159	91234457	UMR_30539|553|553|3251|81363|0.039956737091798485	0.0120715	.
chr16	91267953	91273040	UMR_30543|225|225|1098|36136|0.03038521142351118	0.00802891	.
chr16	92692897	92700798	UMR_30649|310|310|1023|46799|0.02185944144105643	0.00838072	.
chr16	94075401	94098476	UMR_30728|689|689|3274|97277|0.03365646555712039	0.0114672	.
chr17	4993355	5001506	UMR_30970|422|422|1763|46450|0.03795479009687836	0.00680308	.
chr17	8366945	8373174	UMR_31130|92|92|1742|12549|0.13881584189975296	0.0306476	.
chr17	8427641	8439160	UMR_31138|282|282|2962|43047|0.0688085116268265	0.0142685	.
chr17	8797663	8805338	UMR_31155|283|283|1529|39469|0.03873926372596215	0.00879335	.
chr17	10314143	10322264	UMR_31215|385|385|974|43017|0.022642211218820468	0.00628931	.
chr17	13758436	13763728	UMR_31341|294|294|604|40555|0.01489335470348909	0.00553194	.
chr17	15039471	15044736	UMR_31366|29|120|4|842|0.004750593824228029	0	.
chr17	15371669	15382652	UMR_31382|336|336|2375|50505|0.04702504702504703	0.00781448	.
chr17	15823787	15833749	UMR_31400|336|336|1738|49003|0.03546721629288003	0.00680196	.
chr17	23532389	23539180	UMR_31471|103|141|907|10987|0.08255210703558752	0.0417204	.
chr17	26835154	26858321	UMR_31673|570|570|1615|81615|0.019788029161306134	0.0109724	.
chr17	26946013	26954206	UMR_31682|255|256|2361|25107|0.09403751941689568	0.0102564	.
chr17	28140413	28146528	UMR_31802|233|235|2455|26545|0.09248446035034846	0.0106838	.
chr17	29882841	29890437	UMR_31968|315|315|1812|47780|0.037923817496860614	0.00643371	.
chr17	32162023	32167334	UMR_32138|179|179|1396|17732|0.07872772388901421	0.00747268	.
chr17	34116747	34123946	UMR_32220|423|423|540|52813|0.010224755268589174	0.00565497	.
chr17	34626538	34633118	UMR_32248|258|258|1618|31404|0.0515220990956566	0.0171283	.
chr17	35699681	35706484	UMR_32334|187|187|673|24211|0.027797282227086863	0.00934727	.
chr17	36154139	36169364	UMR_32373|258|263|1362|24735|0.05506367495451789	0.0126884	.
chr17	36174680	36180742	UMR_32374|60|72|142|2966|0.04787592717464599	0.00555556	.
chr17	44733238	44739876	UMR_32505|305|305|740|38408|0.01926681941262237	0.00715447	.
chr17	45592138	45600034	UMR_32554|172|172|2760|21902|0.12601588895991234	0.0199833	.
chr17	46027085	46033459	UMR_32587|284|284|1703|36028|0.0472687909403797	0.00663905	.
chr17	46856077	46861170	UMR_32643|237|237|502|22279|0.022532429642264016	0.00573101	.
chr17	47138581	47145056	UMR_32654|225|225|1269|21056|0.060267857142857144	0.00757576	.
chr17	47921045	47926322	UMR_32723|269|269|1121|31929|0.035109148423063674	0.00657895	.
chr17	48094669	48101650	UMR_32746|255|256|1787|33416|0.05347737610725401	0.0131735	.
chr17	56469126	56476835	UMR_32984|340|340|2261|44523|0.05078274150439099	0.010908	.
chr17	62878963	62887129	UMR_33109|387|387|1492|47642|0.0313169052516687	0.00555556	.
chr17	66446351	66451878	UMR_33254|306|306|1230|42540|0.028913963328631876	0.0073115	.
chr17	70846846	70854472	UMR_33418|292|292|535|37749|0.014172560862539405	0.0047697	.
chr17	78198633	78203787	UMR_33599|238|238|450|26992|0.016671606401896858	0.00639753	.
chr17	79710117	79716618	UMR_33652|240|240|1275|39641|0.032163668928634495	0.0084888	.
chr17	81667835	81672968	UMR_33740|143|143|816|15973|0.05108620797595943	0.00740741	.
chr17	84182419	84189184	UMR_33842|376|401|1412|46287|0.030505325469354246	0.00813008	.
chr17	85484569	85490457	UMR_33905|145|145|833|17578|0.047388781431334626	0.0135538	.
chr17	85605261	85610967	UMR_33910|142|142|1612|19595|0.08226588415412095	0.0208209	.
chr17	85611840	85626784	UMR_33911|575|575|2199|74198|0.029636917437127687	0.0104997	.
chr17	85679387	85693517	UMR_33916|556|556|1363|83996|0.016226963188723274	0.0103094	.
chr17	86165679	86170832	UMR_33938|273|273|1102|34133|0.03228547153780799	0.00488407	.
chr17	90451367	90456676	UMR_34105|126|126|1009|17827|0.05659954002355977	0.00723743	.
chr17	93198015	93204468	UMR_34122|185|185|779|25221|0.03088695927996511	0.0111655	.
chr18	6512507	6517640	UMR_34173|105|105|588|12869|0.0456911958971171	0.0075188	.
chr18	7000791	7006898	UMR_34179|251|251|1158|39401|0.029390117002106544	0.00799634	.
chr18	9209681	9218520	UMR_34200|310|310|965|48441|0.019921141182056522	0.00591731	.
chr18	11046029	11061325	UMR_34229|492|492|1363|69179|0.019702510877578457	0.00926695	.
chr18	13967603	13974170	UMR_34345|286|286|1062|29028|0.036585365853658534	0.00896626	.
chr18	15061207	15067978	UMR_34376|330|330|1555|47840|0.03250418060200669	0.00851034	.
chr18	16804180	16811472	UMR_34427|282|282|425|31502|0.013491206907497937	0.00539492	.
chr18	21650584	21655900	UMR_34480|177|177|577|21701|0.026588636468365512	0.00952948	.
chr18	22342841	22348164	UMR_34497|222|222|840|22766|0.03689712729508917	0.00641026	.
chr18	23035753	23042412	UMR_34506|196|196|356|25147|0.014156758261422833	0.00642486	.
chr18	33459845	33465518	UMR_34733|150|151|357|14339|0.024897133691331334	0.00775613	.
chr18	35210469	35216044	UMR_34822|72|72|1494|10678|0.13991384154336017	0.122711	.
chr18	35828347	35835384	UMR_34854|280|280|1356|26733|0.05072382448658961	0.00724655	.
chr18	35916661	35921736	UMR_34864|184|184|1365|22752|0.05999472573839663	0.0103148	.
chr18	36279917	36288412	UMR_34897|375|375|1855|43049|0.043090431833492066	0.00634921	.
chr18	38144286	38149292	UMR_35028|92|92|1400|11287|0.12403650217063879	0.0460032	.
chr18	38208285	38215408	UMR_35038|265|265|1905|37158|0.05126756014855482	0.00825601	.
chr18	42392969	42404018	UMR_35144|333|333|1188|47588|0.024964276708413887	0.011229	.
chr18	43389465	43395426	UMR_35199|126|126|535|15782|0.03389937903941199	0.00793769	.
chr18	47365575	47371629	UMR_35317|247|247|620|34854|0.017788489126068743	0.00569842	.
chr18	53460141	53475516	UMR_35432|490|492|1904|66023|0.02883843509080169	0.0101653	.
chr18	54120887	54127444	UMR_35459|102|103|1921|13589|0.14136433880344396	0.096269	.
chr18	54981937	54993768	UMR_35514|209|210|1097|24663|0.04447958480314641	0.00751974	.
chr18	55375127	55380494	UMR_35543|58|58|1094|8132|0.13453025086079684	0.0916833	.
chr18	55692553	55698783	UMR_35560|77|77|1266|9321|0.13582233665915674	0.0422469	.
chr18	60921597	60926912	UMR_35749|81|82|1731|11973|0.14457529441242797	0.0702625	.
chr18	61397496	61403240	UMR_35778|263|263|1622|35018|0.046319035924381746	0.00747562	.
chr18	64329621	64349554	UMR_35885|602|602|2191|77912|0.028121470376835406	0.010279	.
chr18	65577045	65585140	UMR_35954|225|225|1358|26218|0.051796475703715004	0.00687285	.
chr18	65934225	65942026	UMR_35979|246|246|965|40522|0.023814224371946104	0.00919584	.
chr18	69343869	69353550	UMR_36153|235|235|695|23366|0.029744072584096552	0.00814947	.
chr18	69498731	69508206	UMR_36178|162|162|2125|17604|0.12071120199954556	0.0402682	.
chr18	69515567	69526614	UMR_36179|195|195|3510|26239|0.1337703418575403	0.0924125	.
chr18	69559214	69564741	UMR_36183|78|78|1894|10233|0.18508746213231703	0.11705	.
chr18	69574539	69580797	UMR_36185|86|86|954|11049|0.08634265544393158	0.0322764	.
chr18	69589731	69610502	UMR_36186|313|313|4035|37539|0.10748821225925038	0.0437267	.
chr18	72346133	72351646	UMR_36265|128|128|736|15097|0.048751407564416774	0.00684625	.
chr18	73571377	73576644	UMR_36288|289|289|419|38248|0.01095482116711985	0.00544227	.
chr18	75365957	75374741	UMR_36381|401|401|1249|47390|0.026355771259759443	0.00709315	.
chr18	76240671	76246016	UMR_36458|246|246|871|32643|0.026682596575069693	0.00661699	.
chr18	76842601	76863711	UMR_36481|583|583|2352|80601|0.02918077939479659	0.0127834	.
chr18	77560055	77566243	UMR_36517|237|237|650|24859|0.02614747174061708	0.00865801	.
chr18	79105344	79110986	UMR_36594|239|239|384|24662|0.01557051334036169	0.00660131	.
chr18	80706553	80716028	UMR_36652|423|423|2899|58259|0.049760552017714	0.00856999	.
chr18	80979409	80993245	UMR_36662|523|523|2317|67566|0.03429239558357754	0.00808489	.
chr18	82908401	82919016	UMR_36774|445|446|1473|52259|0.028186532463307757	0.00628931	.
chr18	84082049	84092768	UMR_36837|499|499|2221|62527|0.03552065507700673	0.00775194	.
chr18	84718690	84726064	UMR_36865|164|164|2194|23717|0.09250748408314712	0.00844684	.
chr18	86710419	86715892	UMR_36893|159|159|701|24331|0.02881098187497431	0.00789048	.
chr19	3321442	3326468	UMR_36913|231|231|991|33019|0.030013022805051637	0.00765578	.
chr19	4211919	4217674	UMR_36967|199|199|1795|20804|0.08628148432993656	0.0107527	.
chr19	5094130	5099810	UMR_37029|148|148|1397|17901|0.07804033294229373	0.0125385	.
chr19	5796841	5804876	UMR_37074|176|176|479|24948|0.019199935866602534	0.0062818	.
chr19	6417921	6423597	UMR_37124|149|149|3893|19981|0.19483509333867174	0.0212979	.
chr19	6496302	6504732	UMR_37133|231|238|2679|24619|0.10881839229863113	0.0121461	.
chr19	7264117	7270197	UMR_37205|223|223|806|28869|0.02791922131005577	0.00752629	.
chr19	7416325	7424986	UMR_37214|428|428|3234|58479|0.05530190324731955	0.00958453	.
chr19	12004605	12013854	UMR_37356|275|275|1609|35759|0.04499566542688554	0.0067632	.
chr19	14594579	14599970	UMR_37396|285|285|905|39843|0.022714153050724092	0.00618965	.
chr19	16867877	16880694	UMR_37472|422|422|2868|62375|0.04597995991983968	0.012437	.
chr19	21777244	21787179	UMR_37562|201|201|2743|29537|0.09286657412736568	0.0136889	.
chr19	24896668	24903294	UMR_37692|254|254|816|38606|0.02113661088949904	0.00879056	.
chr19	25604780	25616223	UMR_37739|398|398|3865|55068|0.07018595191399724	0.020194	.
chr19	25665375	25677003	UMR_37744|307|307|1457|43564|0.033445046368561195	0.0120684	.
chr19	26603673	26610286	UMR_37765|310|310|659|38988|0.016902636708730892	0.00529101	.
chr19	29250068	29255900	UMR_37885|211|211|1019|27874|0.036557365286647055	0.00694746	.
chr19	32754453	32761038	UMR_37996|290|290|669|36760|0.018199129488574536	0.00700894	.
chr19	37432769	37438419	UMR_38082|276|276|1457|38969|0.037388693576945776	0.012027	.
chr19	37689511	37699985	UMR_38099|397|397|4539|62032|0.07317191127160175	0.0138509	.
chr19	43383849	43389340	UMR_38339|152|152|475|18956|0.025058029120067524	0.00820402	.
chr19	43595291	43620774	UMR_38357|736|736|4244|101889|0.041653171588689655	0.0132316	.
chr19	44292279	44298854	UMR_38397|129|129|1840|17715|0.1038667795653401	0.0127121	.
chr19	44509433	44519442	UMR_38413|226|226|4108|34507|0.11904830903874576	0.065633	.
chr19	44739933	44762368	UMR_38436|721|721|3254|93031|0.03497758811578936	0.00942761	.
chr19	44834175	44839242	UMR_38443|191|191|996|24761|0.04022454666612819	0.0107527	.
chr19	45014253	45019375	UMR_38457|195|195|483|20054|0.024084970579435525	0.00656937	.
chr19	45073907	45082518	UMR_38466|341|341|1517|51107|0.02968282231396873	0.00820432	.
chr19	45139219	45161888	UMR_38473|547|548|3067|78565|0.03903773945140966	0.0122468	.
chr19	45220421	45244976	UMR_38478|827|827|2020|111651|0.018092090532104504	0.00956383	.
chr19	45739219	45746692	UMR_38523|276|276|1715|36988|0.0463663890991673	0.011293	.
chr19	46036926	46047172	UMR_38541|288|289|1528|30635|0.04987759099069691	0.00935684	.
chr19	46314073	46319512	UMR_38553|217|217|3620|29604|0.12228077286853128	0.0163993	.
chr19	46499277	46504930	UMR_38574|310|310|427|39009|0.010946191904432311	0.00575132	.
chr19	46527523	46532842	UMR_38579|98|98|1852|12995|0.1425163524432474	0.0695281	.
chr19	47013270	47019674	UMR_38609|251|251|1547|36314|0.04260064988709589	0.00719945	.
chr19	53309554	53314774	UMR_38791|296|296|616|32876|0.018737072636573794	0.00572932	.
chr19	55739751	55751278	UMR_38917|353|353|2359|38889|0.06065982668620947	0.00999066	.
chr19	59162614	59174516	UMR_39163|388|388|1827|56170|0.032526259569165036	0.00898194	.
chr19	59190033	59196760	UMR_39164|138|138|574|15928|0.036037167252636865	0.0168838	.
chr19	59341462	59346768	UMR_39168|230|230|362|33809|0.01070720813984442	0.00530977	.
chr19	59450494	59471894	UMR_39175|646|646|5794|91688|0.0631925660937091	0.0144572	.
chr19	60144022	60149920	UMR_39208|83|83|1369|11342|0.12070181625815553	0.0764755	.
chr19	60463559	60469461	UMR_39227|131|131|1526|21956|0.06950264164693022	0.0304648	.
chr2	4558747	4564134	UMR_39320|76|76|1013|10781|0.09396159910954457	0.0162348	.
chr2	6865499	6877324	UMR_39417|266|266|1128|33321|0.03385252543441073	0.0078125	.
chr2	6879456	6886110	UMR_39418|58|58|543|6217|0.08734116133183208	0.0204577	.
chr2	9870922	9899828	UMR_39471|744|744|2238|96060|0.02329793878825734	0.0105925	.
chr2	10367551	10376766	UMR_39493|279|279|874|36511|0.023937991290296074	0.00875553	.
chr2	13571921	13577076	UMR_39576|142|142|334|21367|0.015631581410586418	0.00576934	.
chr2	18025081	18034206	UMR_39627|311|311|3165|44471|0.07116997593937623	0.00917023	.
chr2	18038989	18059176	UMR_39628|535|535|2359|67489|0.03495384433018714	0.00872391	.
chr2	18675877	18681676	UMR_39640|321|321|1528|32345|0.04724068635028598	0.00838608	.
chr2	18687447	18701070	UMR_39641|405|405|1105|54733|0.020188917106681525	0.00936446	.
chr2	19428921	19434278	UMR_39673|172|172|993|26224|0.03786607687614399	0.0112374	.
chr2	19441665	19459068	UMR_39674|377|377|2088|57503|0.03631114898353129	0.00979313	.
chr2	22617872	22628418	UMR_39735|263|263|1758|38075|0.046172028890348	0.0100324	.
chr2	24470803	24475994	UMR_39756|132|132|1036|20622|0.05023761031907671	0.0181724	.
chr2	25576714	25582830	UMR_39813|330|330|5706|59306|0.09621286210501467	0.0511163	.
chr2	26194205	26208626	UMR_39836|388|388|3429|62892|0.0545220377790498	0.0226245	.
chr2	26499945	26505017	UMR_39855|201|201|915|32313|0.028316776529570143	0.00763037	.
chr2	28907051	28919966	UMR_40002|439|439|1546|62485|0.02474193806513563	0.0132379	.
chr2	29249693	29255686	UMR_40035|256|256|783|35199|0.022244950140628994	0.00606105	.
chr2	30061351	30068428	UMR_40096|323|323|803|33536|0.023944417938931296	0.00647249	.
chr2	30469395	30475026	UMR_40117|369|370|466|52322|0.00890638737051336	0.00520961	.
chr2	30716185	30726295	UMR_40147|200|200|2024|29880|0.0677376171352075	0.0225241	.
chr2	31634474	31642774	UMR_40226|401|401|2109|61386|0.03435636790147591	0.0111607	.
chr2	33579261	33585628	UMR_40371|130|130|1637|18409|0.08892389592047369	0.0276311	.
chr2	33626073	33647352	UMR_40376|721|721|4331|105043|0.041230734080329005	0.0107097	.
chr2	36089979	36107090	UMR_40557|454|454|3120|64995|0.048003692591737826	0.0108339	.
chr2	37775067	37782592	UMR_40580|120|120|2672|17468|0.15296542248683306	0.0712257	.
chr2	38335873	38360576	UMR_40610|686|686|3294|91699|0.03592187482960556	0.00956622	.
chr2	45095487	45118922	UMR_40746|482|486|3113|47354|0.06573890273260971	0.0104392	.
chr2	49447767	49453536	UMR_40811|237|237|790|27621|0.028601426450888815	0.00634921	.
chr2	51144029	51149835	UMR_40903|160|160|421|22256|0.018916247304097772	0.00775993	.
chr2	57374005	57379223	UMR_41033|55|55|1011|6761|0.14953409258985356	0.14199	.
chr2	60118762	60127606	UMR_41163|201|201|1260|21924|0.05747126436781609	0.0114149	.
chr2	61801543	61816320	UMR_41232|498|498|2951|68534|0.04305891966031459	0.00871944	.
chr2	63851953	63857219	UMR_41278|49|50|1245|6015|0.20698254364089774	0.109984	.
chr2	65930016	65935043	UMR_41344|51|51|927|6057|0.15304606240713226	0.0689611	.
chr2	70470354	70478510	UMR_41476|361|361|1884|46017|0.040941391224982075	0.00924593	.
chr2	70557920	70570377	UMR_41479|453|453|1793|59409|0.030180612365129863	0.00940706	.
chr2	71524767	71552813	UMR_41525|900|900|3699|119321|0.03100041065696734	0.0106995	.
chr2	72474711	72479723	UMR_41589|166|166|700|25007|0.027992162194585515	0.00690697	.
chr2	73262347	73282475	UMR_41627|729|730|2456|101113|0.024289656127303116	0.00899491	.
chr2	74647097	74716566	UMR_41701|2270|2270|7539|304268|0.024777498783966765	0.0112109	.
chr2	74719140	74754348	UMR_41702|833|833|2833|116827|0.024249531358333264	0.0108393	.
chr2	78867993	78874325	UMR_41862|250|250|744|20862|0.03566292781133161	0.00707751	.
chr2	79453697	79462544	UMR_41892|238|238|1222|31435|0.03887386670908223	0.0126688	.
chr2	84733408	84740101	UMR_41977|103|103|1798|15548|0.11564188320041163	0.044192	.
chr2	84882563	84890610	UMR_41990|285|285|1757|32844|0.05349531116794544	0.00680272	.
chr2	92181767	92187078	UMR_42088|216|216|570|19265|0.02958733454451077	0.00911969	.
chr2	93638741	93649858	UMR_42212|343|343|1998|55426|0.036048064085447265	0.0132335	.
chr2	94239061	94247970	UMR_42235|278|278|997|33590|0.029681452813337304	0.00803308	.
chr2	94262676	94267845	UMR_42236|82|82|219|9259|0.023652662274543688	0.00741492	.
chr2	96314845	96320106	UMR_42260|59|59|669|7013|0.09539426778839298	0.0390019	.
chr2	97465734	97471144	UMR_42268|89|89|273|10166|0.026854219948849106	0.0045977	.
chr2	104813517	104818566	UMR_42437|175|175|351|19355|0.018134848876259366	0.0077522	.
chr2	105120501	105135446	UMR_42446|485|485|1702|70327|0.024201231390504358	0.0113663	.
chr2	105659321	105664914	UMR_42479|151|151|2106|19618|0.10735039249668672	0.0505215	.
chr2	105666836	105684272	UMR_42480|591|591|4113|87473|0.04702022338321539	0.0202398	.
chr2	105685635	105691778	UMR_42481|167|167|1349|21065|0.06403987657251364	0.0230726	.
chr2	106690736	106700630	UMR_42517|293|293|1056|33463|0.03155724232734662	0.00775194	.
chr2	109673251	109680156	UMR_42566|221|221|644|26843|0.02399135715084007	0.00838608	.
chr2	109691601	109697866	UMR_42567|174|174|684|23407|0.02922202759858162	0.00793854	.
chr2	115721827	115727170	UMR_42701|58|58|949|8394|0.11305694543721706	0.0910764	.
chr2	115851917	115863114	UMR_42706|263|263|1707|33764|0.05055680606563204	0.024487	.
chr2	116051844	116077220	UMR_42730|608|610|3166|67792|0.04670167571394855	0.0106528	.
chr2	116321735	116326784	UMR_42734|46|46|1005|5367|0.18725544997205143	0.108689	.
chr2	118544047	118550517	UMR_42821|159|159|1794|24927|0.071970152846311225	0.0108932	.
chr2	118699926	118707378	UMR_42832|294|294|2328|47714|0.04879071132162468	0.00908036	.
chr2	118895560	118904271	UMR_42852|396|396|1191|43993|0.027072488805037164	0.00922036	.
chr2	119321542	119328759	UMR_42880|315|315|1062|42352|0.025075557234605212	0.00724598	.
chr2	119740565	119745586	UMR_42894|246|246|1441|34523|0.04174028908264056	0.0101898	.
chr2	122294467	122303230	UMR_42982|269|271|1556|38814|0.040088627814706033	0.0157668	.
chr2	128122283	128128912	UMR_43135|386|386|1062|61384|0.017300925322559623	0.00773163	.
chr2	130576173	130582786	UMR_43257|205|205|2775|27358|0.10143285327874844	0.022432	.
chr2	137112666	137117988	UMR_43466|284|284|656|40656|0.016135379771743407	0.0063035	.
chr2	140666759	140672031	UMR_43530|84|84|686|12010|0.057119067443796835	0.0130579	.
chr2	146214209	146227622	UMR_43679|556|556|2580|73866|0.03492811306961254	0.00748139	.
chr2	146832813	146840524	UMR_43710|244|244|757|34407|0.02200133693725114	0.0108874	.
chr2	147177521	147196135	UMR_43725|656|656|1680|86740|0.01936822688494351	0.0103046	.
chr2	147358135	147375932	UMR_43733|397|403|1496|57066|0.02621525952405986	0.0106157	.
chr2	148028677	148054431	UMR_43751|606|606|2538|81581|0.031110184969539476	0.0112824	.
chr2	152046701	152052689	UMR_43827|172|172|479|21289|0.022499882568462585	0.00955577	.
chr2	152079039	152084803	UMR_43831|142|142|945|18513|0.05104521147301896	0.00801028	.
chr2	152395231	152400316	UMR_43853|338|338|1395|42335|0.03295145860399197	0.0071138	.
chr2	152410611	152415656	UMR_43855|239|239|552|30904|0.01786176546725343	0.00663762	.
chr2	158606161	158617344	UMR_44240|415|415|1528|62535|0.02443431678260174	0.0137066	.
chr2	160358755	160371890	UMR_44289|479|479|2340|70267|0.033301549802894674	0.0104621	.
chr2	162657295	162663068	UMR_44381|227|227|806|27268|0.029558456799178526	0.00891892	.
chr2	164966434	164971485	UMR_44542|214|214|1005|25575|0.03929618768328446	0.00819968	.
chr2	165877471	165889358	UMR_44654|214|214|2947|25699|0.11467372271294603	0.0624169	.
chr2	166151147	166156478	UMR_44674|238|238|1478|35291|0.04188036609900541	0.00701461	.
chr2	167061689	167067505	UMR_44763|169|169|910|21564|0.04219996290113152	0.0069398	.
chr2	168761791	168768000	UMR_44922|224|224|773|28578|0.027048778780880398	0.00867925	.
chr2	170128486	170134892	UMR_45032|253|253|599|25878|0.02314707473529639	0.00729927	.
chr2	170218231	170223316	UMR_45043|122|122|494|15752|0.031361097003555105	0.0118794	.
chr2	172544226	172554886	UMR_45211|446|446|4849|65929|0.07354881766749079	0.0116616	.
chr2	172933181	172941707	UMR_45243|317|317|3840|46379|0.08279609305935876	0.00959327	.
chr2	175734692	175743810	UMR_45369|13|56|1|151|0.006622516556291391	0	.
chr2	179534677	179540246	UMR_45477|59|60|1514|8229|0.18398347308299914	0.0708149	.
chr2	180888432	180895507	UMR_45590|342|342|1327|50526|0.02626370581482801	0.00645161	.
chr2	181762735	181769574	UMR_45633|57|57|557|7640|0.07290575916230367	0.0123437	.
chr3	5217745	5227962	UMR_45647|156|156|834|16337|0.05104976433861786	0.00760934	.
chr3	8662623	8668578	UMR_45675|262|262|1632|35516|0.045951120621691634	0.00731158	.
chr3	17785300	17795874	UMR_45820|286|286|3259|39935|0.08160761237010142	0.015149	.
chr3	18049331	18059437	UMR_45824|303|303|1926|41725|0.04615937687237867	0.00929168	.
chr3	30010952	30016365	UMR_46020|103|103|1422|12975|0.10959537572254335	0.00917431	.
chr3	30505265	30516302	UMR_46043|436|437|2148|57216|0.03754194630872483	0.00791107	.
chr3	34637269	34669102	UMR_46160|896|896|5063|117903|0.042942079506034625	0.010844	.
chr3	38882862	38888498	UMR_46310|290|290|792|45432|0.017432646592709985	0.00570515	.
chr3	45374987	45382749	UMR_46420|366|366|636|52531|0.012107136738306904	0.00562725	.
chr3	52100751	52106511	UMR_46566|290|290|727|35812|0.020300457947056854	0.00586616	.
chr3	55583405	55588785	UMR_46729|42|125|988|4111|0.2403308197518852	0.149494	.
chr3	58413931	58419562	UMR_46789|311|311|500|50116|0.009976853699417351	0.00555556	.
chr3	63895753	63901576	UMR_46858|104|104|606|14566|0.04160373472470136	0.00811327	.
chr3	66969693	66986622	UMR_46935|501|501|1518|66143|0.022950274405454846	0.00917587	.
chr3	73052883	73058696	UMR_47068|135|135|765|13758|0.05560401221107719	0.00694444	.
chr3	80797589	80804594	UMR_47156|146|146|778|18667|0.04167782718165747	0.00818273	.
chr3	83763575	83769419	UMR_47222|211|211|2156|30526|0.07062831684465701	0.00795976	.
chr3	83976275	83981484	UMR_47232|35|35|607|4622|0.1313284292514063	0.127608	.
chr3	84300910	84306400	UMR_47259|119|119|1111|19208|0.057840483132028324	0.00784314	.
chr3	86544677	86551758	UMR_47349|178|178|867|26947|0.032174268007570415	0.0177145	.
chr3	87905765	87911152	UMR_47420|181|182|973|23169|0.041995770210194655	0.00716846	.
chr3	87944651	87953014	UMR_47423|174|174|3464|22517|0.15383932140160766	0.101776	.
chr3	87969379	87975160	UMR_47425|178|178|761|29426|0.025861483042207572	0.00690554	.
chr3	87993259	88003010	UMR_47429|292|293|3558|45258|0.0786159353042556	0.0206731	.
chr3	88137757	88144586	UMR_47438|243|243|1832|33443|0.054779774541757614	0.00734624	.
chr3	88196958	88244731	UMR_47445|758|758|6437|114977|0.05598511006549136	0.0125291	.
chr3	88529157	88540396	UMR_47476|295|296|1627|34577|0.04705440032391474	0.0105441	.
chr3	88620298	88625729	UMR_47484|174|174|545|22352|0.024382605583392985	0.00508045	.
chr3	89390136	89397044	UMR_47537|256|256|459|26865|0.017085427135678392	0.00740741	.
chr3	89417093	89422534	UMR_47539|143|143|866|18605|0.04654662725073905	0.008061	.
chr3	93442961	93448376	UMR_47617|353|355|338|42303|0.007989977070184147	0.00484689	.
chr3	95902206	95907960	UMR_47694|110|110|740|14155|0.05227834687389615	0.011779	.
chr3	95992872	95998222	UMR_47702|177|177|598|20333|0.029410318201937735	0.00577211	.
chr3	96456455	96464587	UMR_47747|145|323|1105|21407|0.051618629420283085	0.00802038	.
chr3	96496603	96503928	UMR_47752|198|198|1148|26734|0.042941572529363356	0.00843882	.
chr3	96592986	96599172	UMR_47762|224|224|1231|29694|0.041456186434970024	0.00720272	.
chr3	99233262	99265260	UMR_47868|634|634|3384|89925|0.03763135946622185	0.0129423	.
chr3	100681136	100686684	UMR_47884|224|224|710|30116|0.023575508035595695	0.00610607	.
chr3	107579541	107585338	UMR_48199|133|133|1298|18656|0.0695754716981132	0.0144582	.
chr3	107593877	107600516	UMR_48200|245|245|2241|35608|0.06293529543922714	0.0116965	.
chr3	108282335	108288818	UMR_48241|217|217|2599|30212|0.08602542036276976	0.0131109	.
chr3	114029409	114034604	UMR_48324|78|78|363|8627|0.04207719948997334	0.00917463	.
chr3	118428270	118436294	UMR_48418|169|169|756|21702|0.03483549903234725	0.00925926	.
chr3	127624666	127635855	UMR_48690|418|418|1985|57043|0.034798310046806794	0.00875908	.
chr3	129194115	129228212	UMR_48747|988|988|1952|135673|0.014387534734250735	0.00963062	.
chr3	129531633	129537004	UMR_48757|203|203|855|27966|0.03057283844668526	0.00595238	.
chr3	131105388	131114293	UMR_48833|403|403|1435|55001|0.026090434719368737	0.0079137	.
chr3	134234955	134241518	UMR_48918|213|216|355|19585|0.018126116926219044	0.00411523	.
chr3	137863469	137868952	UMR_49012|340|341|820|37771|0.021709777342405548	0.00575962	.
chr3	144196693	144206372	UMR_49189|365|365|1564|40262|0.03884556157170533	0.00617284	.
chr3	145648027	145653902	UMR_49251|231|231|1142|35051|0.03258109611708653	0.00833806	.
chr3	148983869	148992342	UMR_49403|385|385|844|50301|0.016778990477326495	0.00609756	.
chr3	152209092	152214196	UMR_49506|218|218|933|29774|0.031336065023174584	0.00587143	.
chr3	154325902	154335416	UMR_49600|335|335|843|45221|0.01864178147320935	0.00991656	.
chr4	6986678	6991914	UMR_49710|160|160|527|20132|0.026177230280151002	0.00565337	.
chr4	8689253	8694508	UMR_49741|394|394|545|42831|0.012724428568093204	0.00650925	.
chr4	9842673	9851506	UMR_49793|241|242|1134|33267|0.034087834791234554	0.00937326	.
chr4	11384337	11389924	UMR_49823|247|247|885|32083|0.027584702178723934	0.00887957	.
chr4	13742401	13748753	UMR_49904|186|186|907|24909|0.03641254165161187	0.00743162	.
chr4	13777735	13787215	UMR_49907|87|87|1969|11915|0.16525388166177088	0.105152	.
chr4	21673722	21691716	UMR_49993|573|573|2161|85084|0.02539842978703399	0.00855229	.
chr4	22476345	22499349	UMR_50017|655|655|2926|77944|0.03753977214410346	0.00890729	.
chr4	23825471	23833882	UMR_50036|36|36|637|4304|0.14800185873605948	0.133062	.
chr4	24212875	24220538	UMR_50043|56|56|757|6285|0.12044550517104216	0.065997	.
chr4	26929885	26934994	UMR_50072|40|40|923|4312|0.21405380333951762	0.149904	.
chr4	32237655	32244692	UMR_50165|299|299|1621|39921|0.04060519526063976	0.00644063	.
chr4	41681127	41686837	UMR_50429|164|164|1359|30919|0.043953556065849476	0.0136215	.
chr4	44700648	44707684	UMR_50554|257|257|1636|43435|0.037665477149764016	0.00836393	.
chr4	44710175	44717468	UMR_50555|236|236|769|36095|0.021304889873943758	0.0107801	.
chr4	45528019	45533142	UMR_50603|280|280|999|41415|0.0241216950380297	0.00666667	.
chr4	46337478	46349632	UMR_50667|491|491|2608|70995|0.03673498133671385	0.011862	.
chr4	48042199	48049965	UMR_50780|410|410|1040|54884|0.018949056191239707	0.00649496	.
chr4	54944261	54951970	UMR_50930|209|209|265|21319|0.012430226558468972	0.00669795	.
chr4	66400709	66405799	UMR_51254|185|185|877|27243|0.03219175568035826	0.00685192	.
chr4	72194990	72205478	UMR_51304|328|328|1145|51564|0.02220541463036227	0.00650166	.
chr4	72380915	72386090	UMR_51306|58|58|1039|8050|0.12906832298136647	0.121322	.
chr4	81563413	81569278	UMR_51385|88|88|891|11022|0.08083832335329341	0.0312278	.
chr4	82488770	82518192	UMR_51424|638|638|3749|71432|0.05248348079292194	0.0104496	.
chr4	82531397	82545536	UMR_51426|200|200|3109|28206|0.11022477487059491	0.0318992	.
chr4	88028639	88036137	UMR_51660|311|311|713|34300|0.020787172011661807	0.00714957	.
chr4	89270505	89284697	UMR_51699|268|268|801|34182|0.0234333859926277	0.0101565	.
chr4	89285622	89311726	UMR_51700|474|474|2489|61584|0.040416341906988826	0.0106122	.
chr4	89687685	89693574	UMR_51719|128|128|1377|20770|0.06629754453538758	0.00825981	.
chr4	91370095	91377358	UMR_51740|302|302|1622|39252|0.041322735147253646	0.0063278	.
chr4	95047936	95054882	UMR_51772|302|302|984|45175|0.021781959048146098	0.0055103	.
chr4	97578695	97587285	UMR_51821|120|120|2558|14925|0.17139028475711893	0.12344	.
chr4	97606395	97612254	UMR_51823|61|61|979|7813|0.1253039805452451	0.0391223	.
chr4	97750160	97759774	UMR_51835|176|176|3136|24255|0.1292929292929293	0.0115142	.
chr4	97771051	97782647	UMR_51836|375|375|994|40647|0.024454449282849903	0.00694444	.
chr4	98098804	98103984	UMR_51866|64|64|1113|8137|0.13678259800909426	0.0950834	.
chr4	99649834	99664036	UMR_51929|687|688|2007|91244|0.021995966858094778	0.0108459	.
chr4	100775775	100781668	UMR_51965|218|218|1222|32436|0.03767418917252435	0.00671387	.
chr4	106837053	106842982	UMR_52217|193|193|1449|20250|0.07155555555555555	0.00979983	.
chr4	106907371	106914218	UMR_52223|316|316|1662|39702|0.041861870938491766	0.00669143	.
chr4	109974067	109988719	UMR_52372|689|689|2916|102897|0.028339018630280766	0.00854167	.
chr4	114899147	114917299	UMR_52432|555|555|2726|79991|0.03407883386881024	0.0106455	.
chr4	115052003	115065008	UMR_52439|383|383|1128|48590|0.02321465322082733	0.00937326	.
chr4	115931667	115946458	UMR_52465|378|378|3600|52626|0.06840725116862388	0.0107868	.
chr4	115961755	115968611	UMR_52467|144|144|1277|20070|0.06362730443447932	0.0118624	.
chr4	116219001	116224328	UMR_52482|137|137|395|16137|0.024477907913490735	0.00635151	.
chr4	117492865	117497900	UMR_52556|268|268|559|33969|0.016456180635285114	0.00702771	.
chr4	119812369	119817582	UMR_52690|86|86|1014|11242|0.09019747375911759	0.015098	.
chr4	120266968	120273218	UMR_52724|243|243|3743|35486|0.10547821676153976	0.0401073	.
chr4	120281809	120288708	UMR_52727|264|264|1836|33702|0.05447747908136016	0.00676545	.
chr4	120745588	120750914	UMR_52749|221|221|1530|25097|0.06096346176833885	0.00995025	.
chr4	122994987	123000274	UMR_52783|202|202|713|27094|0.02631578947368421	0.00659347	.
chr4	123661395	123668106	UMR_52809|253|253|1307|32600|0.0400920245398773	0.0064731	.
chr4	124656060	124661219	UMR_52900|389|389|1140|54598|0.020879885710099272	0.00683923	.
chr4	124983637	124991391	UMR_52929|245|245|3464|32811|0.1055743500655268	0.0234587	.
chr4	125483236	125495908	UMR_52991|385|385|2317|53622|0.043209876543209874	0.0103415	.
chr4	126254445	126261305	UMR_53071|200|200|1260|26845|0.0469361147327249	0.0071147	.
chr4	126464093	126469668	UMR_53082|136|136|889|16209|0.054846073169226975	0.00937307	.
chr4	126731016	126736726	UMR_53098|247|247|1195|37021|0.03227897679695308	0.0161289	.
chr4	127167563	127173840	UMR_53118|207|207|1365|23268|0.058664259927797835	0.0118365	.
chr4	128732809	128738630	UMR_53214|76|76|2284|12040|0.18970099667774087	0.135334	.
chr4	129981502	129988657	UMR_53323|323|323|1528|37455|0.0407956214123615	0.00724638	.
chr4	133008978	133018098	UMR_53547|262|262|1627|28032|0.0580408105022831	0.00740741	.
chr4	133090077	133101535	UMR_53558|116|317|2288|14225|0.16084358523725834	0.0265795	.
chr4	133493851	133500110	UMR_53597|211|211|3116|28112|0.11084234490608992	0.0129486	.
chr4	133750009	133758036	UMR_53617|437|437|593|48272|0.012284554192906862	0.00648134	.
chr4	133966533	133972160	UMR_53627|228|228|1231|28298|0.043501307512898435	0.00739255	.
chr4	134015509	134021018	UMR_53633|153|153|762|19588|0.03890136818460282	0.0119951	.
chr4	134249281	134258172	UMR_53650|269|270|2924|42509|0.06878543367286928	0.0173044	.
chr4	134466747	134471760	UMR_53673|176|176|1015|22844|0.04443179828401331	0.00757805	.
chr4	135146614	135159324	UMR_53737|443|443|1811|66545|0.0272146667668495	0.0151515	.
chr4	136142237	136148842	UMR_53823|239|243|2185|31266|0.06988421927972878	0.00839135	.
chr4	136244875	136250039	UMR_53840|162|162|1910|22305|0.08563102443398342	0.0136381	.
chr4	136833667	136839054	UMR_53891|261|261|1500|34587|0.04336889582791222	0.00775194	.
chr4	137380937	137389270	UMR_53941|94|177|913|13579|0.06723617350320348	0.0106868	.
chr4	138688468	138693890	UMR_54057|70|70|1435|9438|0.1520449247721975	0.113467	.
chr4	139806897	139811916	UMR_54155|80|83|1391|9851|0.14120393868642778	0.0379099	.
chr4	139817192	139839024	UMR_54157|652|653|4318|81992|0.05266367450482974	0.0115199	.
chr4	140243221	140249739	UMR_54216|258|258|1157|32954|0.03510954664077198	0.00914072	.
chr4	140699315	140704655	UMR_54272|308|317|939|30210|0.031082423038728896	0.00689749	.
chr4	141534225	141539446	UMR_54357|314|314|807|40165|0.02009212000497946	0.00524934	.
chr4	148803127	148810446	UMR_54632|279|285|1468|34593|0.04243633104963432	0.00786688	.
chr4	150028807	150033856	UMR_54747|128|128|1463|18950|0.07720316622691292	0.0100546	.
chr4	152285522	152293303	UMR_54965|230|230|2216|34371|0.0644729568531611	0.0135545	.
chr4	153478223	153484958	UMR_55072|313|313|1602|48313|0.033158777140728166	0.00768805	.
chr4	154632169	154640133	UMR_55182|418|419|2063|54766|0.03766935690026659	0.00765426	.
chr4	154957141	154965552	UMR_55213|338|338|2142|51933|0.041245450869389404	0.00775417	.
chr4	156252093	156306710	UMR_55299|81|84|1367|12592|0.10856099110546379	0.0428867	.
chr5	3339441	3345512	UMR_55303|294|294|210|24521|0.008564087924636025	0.00514808	.
chr5	13397156	13403013	UMR_55429|80|80|597|8337|0.0716084922634041	0.0128928	.
chr5	15932775	15938292	UMR_55459|196|196|779|22654|0.03438686324710868	0.00762659	.
chr5	16962834	16968378	UMR_55480|11|34|223|1162|0.1919104991394148	0.110796	.
chr5	23430301	23438720	UMR_55608|243|243|377|31604|0.011928869763321099	0.00622493	.
chr5	24422837	24429225	UMR_55649|230|230|1539|30123|0.05109052883178966	0.0101097	.
chr5	24524194	24530502	UMR_55662|264|264|1844|35417|0.05206539232571929	0.00954892	.
chr5	24595813	24607020	UMR_55668|327|327|2726|43060|0.06330701346957733	0.00803213	.
chr5	28116475	28125842	UMR_55758|184|184|984|24534|0.040107605771582296	0.0101485	.
chr5	28156931	28180481	UMR_55760|641|641|1747|94282|0.018529517829490253	0.00887364	.
chr5	28457260	28468316	UMR_55767|484|484|1225|67585|0.018125323666494046	0.00872476	.
chr5	29467209	29490502	UMR_55784|592|593|3176|90076|0.03525911452551179	0.0118141	.
chr5	32132257	32137748	UMR_55882|341|341|795|39577|0.02008742451423807	0.00667267	.
chr5	32610283	32615564	UMR_55899|161|161|626|23097|0.027103086980993202	0.00469484	.
chr5	33429183	33436749	UMR_55922|443|443|1010|68848|0.014669997676039973	0.00855155	.
chr5	35375749	35402464	UMR_56005|727|729|3695|106377|0.03473495210430826	0.0104331	.
chr5	37240389	37247716	UMR_56114|311|311|2270|44722|0.050758016188900315	0.00789397	.
chr5	37816713	37833246	UMR_56140|574|574|1916|83386|0.022977478233756267	0.0107679	.
chr5	37893041	37898480	UMR_56146|99|99|1923|14403|0.13351385128098314	0.0183345	.
chr5	41744234	41749290	UMR_56213|62|62|744|8006|0.09293030227329503	0.0583987	.
chr5	41750409	41768984	UMR_56214|521|521|2080|74991|0.027736661732741263	0.0135058	.
chr5	43231370	43236928	UMR_56230|374|374|1000|51519|0.019410314641200334	0.00672733	.
chr5	47982036	47987456	UMR_56329|221|221|529|33488|0.015796703296703296	0.00749064	.
chr5	52111793	52117152	UMR_56390|314|314|702|38485|0.01824087306742887	0.00600673	.
chr5	57713526	57724332	UMR_56506|445|445|2174|63438|0.034269680633059046	0.00645161	.
chr5	64801969	64808927	UMR_56592|268|268|1069|31328|0.03412282941777324	0.00733943	.
chr5	67091501	67103608	UMR_56723|334|334|1407|44411|0.0316813402085069	0.010983	.
chr5	67214696	67224744	UMR_56730|199|199|2402|26288|0.09137248934875228	0.019723	.
chr5	67226313	67233966	UMR_56731|231|231|1524|31212|0.048827374086889655	0.0155388	.
chr5	73646929	73653514	UMR_56877|184|184|693|24826|0.027914283412551356	0.00823084	.
chr5	75066727	75087546	UMR_56950|422|423|1291|56093|0.02301534950885137	0.0105688	.
chr5	75147816	75157734	UMR_56954|369|369|559|47974|0.01165214491182724	0.00796033	.
chr5	84411850	84418825	UMR_57145|164|164|1104|22943|0.04811925205945169	0.00800645	.
chr5	98165571	98173554	UMR_57427|219|219|1490|32280|0.046158612143742256	0.0122395	.
chr5	98178990	98190882	UMR_57428|402|402|1028|56433|0.018216291885953254	0.00782289	.
chr5	99973975	99980070	UMR_57530|250|250|445|27581|0.016134295348246983	0.00671872	.
chr5	100035887	100041525	UMR_57532|279|279|959|37782|0.025382457254777408	0.00588235	.
chr5	101654085	101669864	UMR_57613|561|561|1355|72097|0.018794124582160145	0.00846587	.
chr5	106445877	106473308	UMR_57822|855|855|2619|119250|0.021962264150943395	0.00943396	.
chr5	107717119	107728681	UMR_57881|410|410|2184|63498|0.0343947840876878	0.00992215	.
chr5	108364753	108371037	UMR_57895|292|292|1110|43984|0.025236449618042923	0.0087631	.
chr5	111414017	111435966	UMR_58030|737|737|7967|106615|0.07472682080382685	0.012042	.
chr5	114566965	114573435	UMR_58395|254|254|871|34434|0.025294766800255563	0.00593621	.
chr5	115427393	115439131	UMR_58476|381|381|2101|40980|0.05126891166422645	0.00895399	.
chr5	116588441	116593666	UMR_58580|163|163|1335|21299|0.06267899901403821	0.00691252	.
chr5	118168805	118175210	UMR_58694|273|274|495|33568|0.014746186844613918	0.00843882	.
chr5	119655503	119691692	UMR_58824|887|887|3384|119970|0.028207051762940735	0.0113385	.
chr5	119791775	119809127	UMR_58834|369|369|1888|50533|0.037361724021926265	0.0119904	.
chr5	119827772	119845982	UMR_58836|416|416|1635|55935|0.029230356663984984	0.0107755	.
chr5	120424003	120441118	UMR_58889|664|664|3308|87942|0.037615701257647086	0.0101069	.
chr5	123131487	123145284	UMR_59088|523|523|2159|61882|0.03488898225655279	0.00739792	.
chr5	124350677	124356221	UMR_59179|284|293|288|26990|0.010670618747684327	0.00633509	.
chr5	125175101	125180685	UMR_59232|265|265|1075|31954|0.03364211053389247	0.00724723	.
chr5	128439715	128445517	UMR_59401|96|96|1332|11780|0.11307300509337861	0.0625361	.
chr5	128595447	128604142	UMR_59415|308|308|1486|42421|0.03502982013625327	0.00929075	.
chr5	131533607	131539302	UMR_59583|225|225|941|29121|0.032313450774355275	0.00707746	.
chr5	131793622	131799147	UMR_59610|50|50|1077|6863|0.15692845694302784	0.0384929	.
chr5	132540031	132545620	UMR_59679|263|263|285|22057|0.012921068141633041	0.00653595	.
chr5	135246496	135251687	UMR_59820|206|206|2424|34941|0.06937408774791792	0.00767166	.
chr5	137024502	137033536	UMR_59934|383|383|2250|51414|0.043762399346481504	0.00775613	.
chr5	137347831	137353108	UMR_59961|162|162|694|19605|0.03539913287426677	0.00840551	.
chr5	138992385	138999734	UMR_60030|458|458|1459|60413|0.024150431198583087	0.00823935	.
chr5	139535086	139559934	UMR_60072|936|937|1907|116674|0.016344686905394517	0.00952381	.
chr5	139906437	139914400	UMR_60107|373|373|1602|46978|0.03410106858529525	0.00907071	.
chr5	140579057	140584769	UMR_60154|59|59|1570|7740|0.20284237726098192	0.139277	.
chr5	140606006	140612640	UMR_60155|268|268|1101|39719|0.027719731111055163	0.0100279	.
chr5	142810013	142825384	UMR_60294|643|643|1371|80124|0.017110977984124608	0.0055789	.
chr5	142959699	142964960	UMR_60312|243|243|946|39716|0.023819115721623527	0.00567169	.
chr5	147185173	147194534	UMR_60495|373|373|844|51399|0.01642055292904531	0.0090151	.
chr5	147265835	147279524	UMR_60499|291|291|1153|42141|0.02736052775207043	0.0129199	.
chr5	147297597	147318394	UMR_60502|569|569|2308|78487|0.029406143692586033	0.0101977	.
chr5	147721367	147727990	UMR_60525|254|254|1110|36070|0.030773495980038812	0.009846	.
chr5	147747985	147753607	UMR_60527|139|139|1684|18768|0.08972719522591645	0.0296216	.
chr5	149523694	149528990	UMR_60659|99|99|1327|13430|0.09880863737900224	0.014944	.
chr6	5379103	5385700	UMR_60787|122|122|1514|17669|0.08568679608353613	0.0140849	.
chr6	6846510	6883020	UMR_60850|829|829|4293|106727|0.040224123230297865	0.0148397	.
chr6	8508795	8514307	UMR_60877|232|232|523|29817|0.017540329342321494	0.0055789	.
chr6	8947797	8953210	UMR_60891|211|211|478|29990|0.015938646215405135	0.00766359	.
chr6	14897731	14903106	UMR_60950|214|214|1161|26447|0.043899118992702386	0.00865817	.
chr6	15183610	15189416	UMR_60953|68|68|784|7851|0.09985989045981404	0.0673602	.
chr6	23242558	23256656	UMR_61106|417|417|2557|57958|0.04411815452569102	0.0139382	.
chr6	28131743	28137086	UMR_61158|184|184|777|23181|0.03351883007635564	0.00891897	.
chr6	29431061	29437240	UMR_61228|162|162|1697|20142|0.08425181213384966	0.0251573	.
chr6	30171265	30180874	UMR_61263|380|380|1939|55162|0.0351510097530909	0.0120622	.
chr6	30300092	30305438	UMR_61267|145|145|324|12824|0.025265127885215222	0.00617337	.
chr6	30546472	30553572	UMR_61279|126|128|2260|14398|0.15696624531184886	0.0667225	.
chr6	30957259	30962622	UMR_61302|192|192|849|28289|0.030011665311605217	0.00662252	.
chr6	32582563	32589178	UMR_61387|205|205|773|24681|0.03131963858838783	0.00683923	.
chr6	36815556	36820632	UMR_61536|30|30|990|4244|0.23327049952874646	0.124758	.
chr6	40427777	40433005	UMR_61681|50|50|1209|5803|0.20834051352748578	0.101021	.
chr6	40434481	40440044	UMR_61682|157|157|1977|20069|0.09851014001694156	0.00939087	.
chr6	42368997	42374072	UMR_61706|74|74|1332|9760|0.13647540983606557	0.0240552	.
chr6	47711661	47742167	UMR_61751|28|182|94|1002|0.09381237524950099	0.0222222	.
chr6	47754473	47759505	UMR_61753|25|173|30|350|0.08571428571428572	0.0277778	.
chr6	49209378	49222360	UMR_61803|403|403|1776|50112|0.035440613026819924	0.00682358	.
chr6	51169847	51185893	UMR_61890|364|365|2291|44804|0.05113382733684493	0.0209157	.
chr6	51466674	51472688	UMR_61905|293|293|597|36892|0.01618237016155264	0.00359413	.
chr6	52150037	52277745	UMR_61956|3507|3522|12645|475956|0.02656758187731639	0.012661	.
chr6	52309391	52324366	UMR_61959|417|418|1130|60577|0.018653944566419597	0.0100174	.
chr6	53286364	53295170	UMR_62003|209|211|1282|29289|0.0437706988971969	0.00872743	.
chr6	55675852	55684631	UMR_62166|127|135|1701|15355|0.11077824812764572	0.0615571	.
chr6	63255230	63260448	UMR_62245|200|200|726|25363|0.02862437408823877	0.00641026	.
chr6	64727099	64735554	UMR_62257|267|267|842|38944|0.021620788824979458	0.0072633	.
chr6	66458127	66465184	UMR_62286|9|59|271|1004|0.2699203187250996	0.127689	.
chr6	77241455	77246548	UMR_62458|169|169|641|25669|0.02497175581440648	0.00694444	.
chr6	83067628	83073774	UMR_62542|285|286|929|42531|0.0218428910676918	0.00932645	.
chr6	83082751	83088755	UMR_62544|144|144|1386|20683|0.0670115553836484	0.0206458	.
chr6	83439479	83445275	UMR_62580|125|126|1888|17029|0.11086969287685712	0.0121559	.
chr6	83691815	83723025	UMR_62590|567|570|3350|77808|0.04305469874563027	0.0132989	.
chr6	83757743	83763689	UMR_62594|135|135|2712|22275|0.12175084175084175	0.0331837	.
chr6	84582847	84590732	UMR_62628|417|417|634|52561|0.0120621753771808	0.00694444	.
chr6	85185463	85195529	UMR_62641|367|367|1197|56138|0.021322455377818947	0.00815502	.
chr6	86523103	86528418	UMR_62707|286|287|582|35776|0.01626788908765653	0.00571709	.
chr6	88188211	88206806	UMR_62776|701|701|2793|101631|0.027481772293886708	0.0119579	.
chr6	94694577	94701880	UMR_63057|231|231|2211|35447|0.06237481310124975	0.00737915	.
chr6	99200433	99207307	UMR_63228|88|88|1205|11116|0.10840230298668586	0.0520518	.
chr6	99516357	99524354	UMR_63253|314|314|1315|35520|0.03702139639639639	0.00721248	.
chr6	103507539	103515116	UMR_63425|119|119|1287|16793|0.0766390758053951	0.0161603	.
chr6	107528981	107535658	UMR_63465|128|128|396|17366|0.02280317862489923	0.00608356	.
chr6	108658289	108663811	UMR_63500|213|215|932|21699|0.042951288077791604	0.00623053	.
chr6	119477779	119483610	UMR_63849|299|300|1066|45897|0.02322591890537508	0.00632911	.
chr6	122337478	122342657	UMR_63944|174|174|782|15183|0.05150497266679839	0.00870746	.
chr6	124914947	124920663	UMR_64013|237|237|673|26400|0.025492424242424244	0.00713033	.
chr6	126161073	126168282	UMR_64067|202|205|887|25072|0.03537811104020421	0.0114607	.
chr6	127147221	127156386	UMR_64120|341|341|665|37644|0.017665497821698014	0.00740741	.
chr6	127766043	127771144	UMR_64165|233|235|574|29887|0.019205674708067052	0.00684932	.
chr6	134919253	134930362	UMR_64295|361|369|1239|44463|0.027865866000944605	0.00600601	.
chr6	138419003	138428128	UMR_64443|136|137|714|15590|0.04579858883899936	0.014729	.
chr6	144202381	144211708	UMR_64647|159|159|2641|19755|0.1336876740065806	0.0492763	.
chr6	145045056	145051410	UMR_64719|145|154|2152|19635|0.10960020371785077	0.0106407	.
chr6	148942569	148947698	UMR_64843|272|272|721|38556|0.01870007262164125	0.00681627	.
chr7	3703307	3708742	UMR_64891|116|116|1604|16615|0.09653927174240144	0.0132244	.
chr7	4119090	4125890	UMR_64894|137|137|1528|18525|0.08248313090418354	0.0166013	.
chr7	16308801	16314686	UMR_65059|313|313|690|32982|0.02092050209205021	0.00694444	.
chr7	16398633	16405746	UMR_65062|259|259|1266|26854|0.04714381470172042	0.00529101	.
chr7	16610421	16615980	UMR_65069|227|227|975|24647|0.03955856696555362	0.00666667	.
chr7	17057953	17063225	UMR_65116|100|100|1450|12156|0.11928265876933201	0.0417894	.
chr7	18920914	18927616	UMR_65130|181|181|1980|17857|0.11088088704709638	0.0158492	.
chr7	19091257	19096754	UMR_65149|290|290|2317|39760|0.05827464788732394	0.00977219	.
chr7	19307643	19313612	UMR_65174|200|200|1512|26692|0.05664618612318298	0.00802185	.
chr7	24503783	24508885	UMR_65275|169|169|1042|20174|0.05165063943689898	0.00641026	.
chr7	24930417	24935690	UMR_65305|112|112|798|13045|0.06117286316596397	0.0240592	.
chr7	24942271	24952520	UMR_65307|265|265|2308|30468|0.07575160824471577	0.017164	.
chr7	25246208	25252293	UMR_65334|261|261|503|24804|0.020278987260119334	0.00680272	.
chr7	25277695	25284611	UMR_65337|309|309|810|29563|0.02739911375706119	0.00537634	.
chr7	27328813	27335190	UMR_65400|303|303|2874|38467|0.07471339069852082	0.0144263	.
chr7	29167503	29173074	UMR_65533|251|252|4187|31789|0.13171222750007863	0.0177541	.
chr7	29303382	29310031	UMR_65547|271|271|1208|35461|0.03406559318688136	0.00697607	.
chr7	30452799	30459150	UMR_65625|159|159|1953|23470|0.0832126118449084	0.0144309	.
chr7	31049272	31056338	UMR_65660|178|182|1816|22884|0.07935675581192099	0.0167862	.
chr7	34650835	34656746	UMR_65695|320|323|1142|35150|0.03248933143669986	0.00527083	.
chr7	36690271	36701681	UMR_65822|449|452|2234|52863|0.042260181979834666	0.0090916	.
chr7	37767615	37774595	UMR_65887|337|338|647|38631|0.016748207398203516	0.00552497	.
chr7	40897736	40902989	UMR_65938|252|252|2267|36486|0.06213342103820643	0.00901546	.
chr7	44355579	44361436	UMR_65984|181|181|1376|22095|0.0622765331522969	0.0250321	.
chr7	44586445	44594718	UMR_66005|332|332|1460|46468|0.03141947146423345	0.00840176	.
chr7	44601501	44607092	UMR_66006|148|148|1627|17499|0.09297674152808733	0.0424866	.
chr7	45174469	45182988	UMR_66063|269|269|3187|35214|0.09050377690691203	0.0314068	.
chr7	49631623	49641974	UMR_66327|323|323|1029|45555|0.022588080342443202	0.00880237	.
chr7	49906747	49917524	UMR_66349|292|292|1323|42059|0.031455812073515776	0.0131027	.
chr7	51621262	51634368	UMR_66366|197|197|1513|28112|0.05382043255549231	0.020834	.
chr7	63753178	63759912	UMR_66469|314|314|1859|51852|0.03585204042274165	0.00888262	.
chr7	65153717	65158804	UMR_66546|233|233|1250|34341|0.036399638915581956	0.00627637	.
chr7	67949688	67955630	UMR_66669|392|392|602|47001|0.012808238122593137	0.00582973	.
chr7	69990613	69996002	UMR_66761|56|56|989|7381|0.13399268391816826	0.0260937	.
chr7	70278711	70290718	UMR_66778|217|217|1154|32681|0.035311036993972034	0.0114943	.
chr7	70323529	70372460	UMR_66779|1250|1250|3665|152109|0.024094563766772513	0.00997355	.
chr7	73374231	73380312	UMR_66864|195|195|1154|25122|0.04593583313430459	0.00626825	.
chr7	73389063	73394764	UMR_66865|161|161|494|19679|0.025102901570201737	0.00968118	.
chr7	73537261	73542975	UMR_66872|102|102|466|12050|0.03867219917012448	0.00731268	.
chr7	73551497	73559693	UMR_66874|195|195|428|23965|0.017859378259962446	0.00641975	.
chr7	73614031	73619641	UMR_66882|178|178|731|24295|0.03008849557522124	0.00604302	.
chr7	75845843	75851146	UMR_66956|129|133|1427|18180|0.07849284928492849	0.00748053	.
chr7	79495550	79527078	UMR_67056|742|742|2974|104815|0.028373801459714736	0.00698578	.
chr7	79530501	79553188	UMR_67057|427|427|4322|56556|0.07641983167126389	0.0142206	.
chr7	79589364	79595370	UMR_67063|99|99|1382|12735|0.10851982724774244	0.016647	.
chr7	82863361	82871942	UMR_67234|413|413|1007|55499|0.01814447107155084	0.00647954	.
chr7	96209039	96215290	UMR_67432|263|263|841|37008|0.02272481625594466	0.00553336	.
chr7	98832265	98841309	UMR_67577|315|315|2847|50224|0.056686046511627904	0.0081056	.
chr7	101833991	101839109	UMR_67758|179|179|1054|25003|0.04215494140703115	0.00626649	.
chr7	110625868	110631004	UMR_67895|179|179|1121|28495|0.039340235128969996	0.0149888	.
chr7	116029198	116035772	UMR_68098|222|222|906|32164|0.028168138291257305	0.00642152	.
chr7	117379903	117385008	UMR_68153|175|175|1427|25125|0.05679601990049751	0.00616124	.
chr7	118990207	118996722	UMR_68240|179|179|1348|25227|0.05343481190787648	0.00949027	.
chr7	126271274	126276576	UMR_68496|186|186|1211|26763|0.04524903785076412	0.00577319	.
chr7	129650661	129656799	UMR_68667|98|98|2568|13893|0.1848412869790542	0.0778592	.
chr7	130260001	130267534	UMR_68706|266|266|2860|41957|0.0681650260981481	0.0106094	.
chr7	131539775	131561311	UMR_68760|786|786|2513|113061|0.02222693943977145	0.00904135	.
chr7	132596493	132604600	UMR_68829|224|224|1960|30642|0.0639644931792964	0.0116071	.
chr7	132807626	132814752	UMR_68848|229|229|1088|29096|0.03739345614517459	0.009368	.
chr7	133069703	133075113	UMR_68859|69|69|1899|9840|0.19298780487804879	0.0823759	.
chr7	133119307	133125646	UMR_68865|382|382|1265|47373|0.026702974268042978	0.00665943	.
chr7	137306271	137323761	UMR_69095|881|881|2274|125537|0.018114181476377483	0.00819289	.
chr7	139580359	139588520	UMR_69179|374|374|2392|63825|0.037477477477477476	0.0104404	.
chr7	140056943	140063797	UMR_69211|157|157|2044|25715|0.07948668092552985	0.012855	.
chr7	142091427	142099092	UMR_69303|208|208|1384|32859|0.04211935847104294	0.00709142	.
chr7	142657031	142665614	UMR_69330|351|351|1035|41678|0.024833245357262824	0.0074862	.
chr7	144937439	144943890	UMR_69430|342|342|409|51151|0.007995933608336102	0.00535606	.
chr8	6603683	6612232	UMR_69499|49|49|1190|6025|0.1975103734439834	0.120358	.
chr8	8484412	8490608	UMR_69534|97|97|1843|12816|0.14380461922596754	0.0853894	.
chr8	8646665	8662927	UMR_69546|425|425|2776|65695|0.04225587944287998	0.00775273	.
chr8	12382107	12392084	UMR_69741|372|372|3436|50398|0.06817730862335807	0.0209496	.
chr8	12393698	12403756	UMR_69742|487|487|1307|60889|0.02146528929691734	0.00584795	.
chr8	12477625	12482646	UMR_69752|85|85|2052|11996|0.17105701900633544	0.0517974	.
chr8	23409561	23416223	UMR_70011|236|236|1383|34880|0.03965022935779817	0.00841339	.
chr8	25196529	25202496	UMR_70073|224|224|1380|29299|0.04710058363766682	0.00705334	.
chr8	26975796	26982341	UMR_70176|349|349|1203|46956|0.025619729108101202	0.00863456	.
chr8	34804159	34810780	UMR_70410|369|369|865|53680|0.016114008941877794	0.0064731	.
chr8	44933907	44939968	UMR_70656|279|279|450|40527|0.01110370863868532	0.00542005	.
chr8	46288499	46297970	UMR_70722|265|265|1826|35223|0.05184112653663799	0.0135148	.
chr8	47238798	47244521	UMR_70761|104|104|1513|14116|0.10718333805610654	0.0408138	.
chr8	47283165	47290390	UMR_70768|300|300|676|43582|0.015510990776008444	0.00645093	.
chr8	48550913	48556662	UMR_70861|187|187|571|24465|0.02333946454118128	0.00542005	.
chr8	48841834	48847266	UMR_70891|179|179|1446|19473|0.07425666307194577	0.00709501	.
chr8	54953084	54961056	UMR_70969|58|58|828|6655|0.12441773102930127	0.0779518	.
chr8	57310964	57354467	UMR_70987|958|958|3048|126941|0.024011154788445024	0.0113252	.
chr8	60627534	60634452	UMR_71035|176|176|2016|29137|0.0691903764972372	0.00789809	.
chr8	60949377	60955531	UMR_71042|43|43|905|5561|0.16274051429598993	0.103943	.
chr8	69880827	69889836	UMR_71220|566|566|9488|97488|0.09732479894961431	0.0543325	.
chr8	70082969	70088812	UMR_71229|246|246|2699|40221|0.06710424902414162	0.0134618	.
chr8	70371645	70377440	UMR_71251|251|251|2771|39667|0.06985655582726195	0.0322055	.
chr8	70486325	70496349	UMR_71256|454|454|1524|52243|0.029171372241257203	0.0128199	.
chr8	71568253	71573325	UMR_71344|135|135|1239|20637|0.06003779619130688	0.0072058	.
chr8	71679083	71694401	UMR_71359|561|561|6295|90989|0.06918418709953951	0.0350028	.
chr8	76898073	76903521	UMR_71423|261|261|632|32156|0.01965418584401045	0.00647249	.
chr8	78425496	78439932	UMR_71484|359|359|2036|46754|0.04354707618599478	0.00883152	.
chr8	83897119	83903878	UMR_71632|322|322|1298|32830|0.0395370088333841	0.00695199	.
chr8	84659365	84665940	UMR_71690|289|289|1043|43180|0.02415470125057897	0.00694602	.
chr8	84703699	84709634	UMR_71693|260|261|2476|30065|0.08235489772160319	0.0582281	.
chr8	84711267	84716976	UMR_71694|90|90|1644|11829|0.13898047172203906	0.111941	.
chr8	84737455	84747228	UMR_71700|165|165|2190|22313|0.09814906108546587	0.0379814	.
chr8	84768645	84791178	UMR_71705|472|472|5862|60755|0.09648588593531397	0.053617	.
chr8	84975434	84981557	UMR_71730|304|304|1929|44140|0.043701857725419124	0.0100622	.
chr8	87466997	87474511	UMR_71802|377|377|1564|52015|0.03006824954340094	0.00959282	.
chr8	87830025	87838433	UMR_71836|145|145|2967|19662|0.15090021361000916	0.117344	.
chr8	87953325	87963188	UMR_71850|437|437|2243|54241|0.04135248243948305	0.00756202	.
chr8	89034505	89047873	UMR_71914|498|498|1268|61840|0.020504527813712807	0.00749544	.
chr8	90344651	90350544	UMR_71977|227|227|1086|24006|0.045238690327418146	0.00698099	.
chr8	91797355	91808036	UMR_72066|518|518|2201|74189|0.029667470918869374	0.0099298	.
chr8	92353367	92367551	UMR_72114|684|684|2177|98347|0.022135906535023946	0.00857776	.
chr8	93809708	93815464	UMR_72168|293|293|1295|32748|0.03954439965799438	0.00741344	.
chr8	94992421	94998828	UMR_72244|84|84|1575|12824|0.12281659388646288	0.043929	.
chr8	102780463	102787484	UMR_72372|217|217|1323|27749|0.047677393779956036	0.0101399	.
chr8	105263489	105273196	UMR_72458|334|334|3097|52175|0.059357930043124105	0.0149409	.
chr8	105274417	105279606	UMR_72459|129|129|2432|20827|0.11677149853555481	0.0284064	.
chr8	106507217	106513003	UMR_72538|182|182|1429|23964|0.059631113336671676	0.0122717	.
chr8	108694677	108705902	UMR_72669|385|385|1090|40512|0.02690560821484992	0.00901559	.
chr8	109247491	109252946	UMR_72716|110|110|733|13409|0.054664777388321276	0.013893	.
chr8	109415168	109420174	UMR_72726|86|86|1880|10959|0.17154849895063418	0.0929962	.
chr8	111535520	111540638	UMR_72825|200|200|1237|19647|0.06296126635109686	0.00512594	.
chr8	115704853	115709926	UMR_73034|280|280|375|30711|0.012210608576731464	0.00562598	.
chr8	120224780	120230886	UMR_73310|304|304|2285|44080|0.051837568058076225	0.00789853	.
chr8	120484391	120491610	UMR_73365|309|309|1474|40448|0.036441851265822785	0.00793651	.
chr8	120508861	120514856	UMR_73370|118|118|1732|14396|0.12031119755487635	0.0569974	.
chr8	120534472	120540557	UMR_73377|346|346|1243|40727|0.030520293662680775	0.00569801	.
chr8	121070181	121093276	UMR_73430|771|771|3487|109220|0.031926387108588174	0.009623	.
chr8	121112811	121130306	UMR_73432|692|692|2258|106839|0.02113460440475856	0.00916502	.
chr8	123607629	123617500	UMR_73624|67|545|89|2172|0.040976058931860036	0.00925926	.
chr8	126588625	126596798	UMR_73833|436|436|776|61107|0.012699036116975142	0.00625662	.
chr8	126659409	126669054	UMR_73837|147|147|2624|19745|0.13289440364649277	0.0643335	.
chr8	128356621	128363784	UMR_73912|213|214|815|30674|0.02656973332463976	0.00534225	.
chr9	7999527	8005628	UMR_73952|231|231|1105|25556|0.04323837846298325	0.00551608	.
chr9	10525173	10530259	UMR_73970|30|30|670|3685|0.18181818181818182	0.0799801	.
chr9	21029235	21038972	UMR_74135|416|416|3341|67859|0.04923444200474513	0.0141985	.
chr9	24767896	24783080	UMR_74286|359|359|1859|52394|0.03548116196511051	0.0103054	.
chr9	31911929	31917624	UMR_74526|224|224|689|34451|0.019999419465327566	0.00826724	.
chr9	32539505	32551260	UMR_74550|307|307|1505|43584|0.03453102055800294	0.00995524	.
chr9	34485371	34490668	UMR_74594|150|150|836|22396|0.03732809430255403	0.00678405	.
chr9	35420591	35436151	UMR_74653|259|264|2457|31757|0.0773687690902793	0.012228	.
chr9	37430427	37435989	UMR_74712|135|135|1250|19112|0.0654039347007116	0.0136881	.
chr9	37451223	37462060	UMR_74713|198|200|1661|27372|0.06068244921817916	0.0121064	.
chr9	37526781	37532664	UMR_74716|148|148|3022|22562|0.13394202641609787	0.110929	.
chr9	40871073	40880056	UMR_74791|295|303|921|41439|0.02222543980308405	0.00953501	.
chr9	41374112	41379734	UMR_74830|79|86|629|10511|0.05984207021215869	0.0188185	.
chr9	41575381	41590834	UMR_74841|175|183|950|20257|0.04689736881078146	0.00894365	.
chr9	41934795	41940634	UMR_74863|83|85|1293|9793|0.13203308485653018	0.0373016	.
chr9	44083397	44088597	UMR_75025|171|171|2479|26636|0.09306952995945338	0.0132715	.
chr9	44482051	44491120	UMR_75054|211|219|1507|26524|0.056816468104358316	0.0114441	.
chr9	44878280	44883808	UMR_75080|250|255|457|24792|0.018433365601807035	0.00593741	.
chr9	45133685	45139738	UMR_75090|128|133|1208|18467|0.06541398169708128	0.00904049	.
chr9	45429166	45434661	UMR_75104|174|175|1157|24380|0.04745693191140279	0.0106045	.
chr9	46011513	46016748	UMR_75144|171|175|1121|18101|0.061930280095022376	0.00823045	.
chr9	47529149	47534282	UMR_75249|283|284|438|37183|0.011779576688271521	0.00653595	.
chr9	49792777	49799826	UMR_75397|192|192|1063|26801|0.03966269915301668	0.00649713	.
chr9	55538169	55550314	UMR_75596|454|454|2240|71240|0.031443009545199324	0.0116372	.
chr9	56633155	56638547	UMR_75637|218|218|1724|26807|0.06431156041332488	0.00926831	.
chr9	57070759	57077884	UMR_75669|355|355|567|46916|0.0120854292778583	0.0047455	.
chr9	57500910	57506277	UMR_75686|184|186|2121|29319|0.07234216719533408	0.0115877	.
chr9	57937464	57942892	UMR_75720|172|173|1195|24843|0.04810208106911404	0.00631849	.
chr9	58195192	58204985	UMR_75743|373|373|1199|56378|0.021267160949306467	0.0117446	.
chr9	59655577	59660722	UMR_75810|158|158|901|22289|0.040423527300462114	0.00674789	.
chr9	61367421	61379350	UMR_75921|428|430|1568|53093|0.029533083457329593	0.00650407	.
chr9	62339600	62346600	UMR_76003|353|362|575|40405|0.014230912015839623	0.0047619	.
chr9	63131607	63153135	UMR_76045|894|894|2524|137444|0.018363842728674952	0.00910026	.
chr9	63754758	63759784	UMR_76089|219|221|836|32342|0.02584874157442335	0.00731949	.
chr9	64015163	64023670	UMR_76118|381|381|1686|49786|0.033864941951552645	0.00726452	.
chr9	65823376	65828848	UMR_76222|148|148|997|16872|0.05909198672356567	0.00645186	.
chr9	67039981	67050368	UMR_76275|292|292|3080|42576|0.0723412251033446	0.00796525	.
chr9	69666741	69671994	UMR_76384|101|101|728|12116|0.060085836909871244	0.0132807	.
chr9	69754001	69773078	UMR_76390|529|529|1331|71048|0.018733813759711743	0.00768661	.
chr9	74846541	74869104	UMR_76553|705|705|2075|97644|0.02125066568350334	0.0110497	.
chr9	78476639	78483012	UMR_76667|177|178|511|21186|0.02411970168979515	0.00638391	.
chr9	79716295	79721566	UMR_76691|184|184|1665|25600|0.0650390625	0.0105903	.
chr9	87726111	87741424	UMR_76841|477|477|1586|68188|0.02325922449697894	0.0106705	.
chr9	88479689	88484790	UMR_76860|273|277|770|27650|0.027848101265822784	0.00645582	.
chr9	88519005	88524086	UMR_76861|114|114|324|14073|0.02302280963547218	0.00510018	.
chr9	89867165	89872925	UMR_76882|55|55|1373|6132|0.22390737116764514	0.128779	.
chr9	89906675	89911780	UMR_76890|201|201|574|22961|0.024998911197247505	0.00747001	.
chr9	91360186	91368905	UMR_76915|346|346|1549|42065|0.036823962914537024	0.00873288	.
chr9	91376883	91388624	UMR_76917|363|363|3335|50153|0.06649652064682073	0.0268497	.
chr9	91391904	91397212	UMR_76918|77|77|963|9427|0.1021533892012305	0.0839628	.
chr9	91400341	91410713	UMR_76919|141|141|2250|17639|0.12755825160156473	0.0674196	.
chr9	94534583	94540378	UMR_76959|283|283|713|38684|0.018431392823906524	0.00542542	.
chr9	98951301	98966398	UMR_77147|534|534|1836|77999|0.02353876331747843	0.00906327	.
chr9	99867106	99880496	UMR_77192|462|462|1484|63134|0.02350555960338328	0.0104306	.
chr9	100640789	100646060	UMR_77223|262|262|596|27991|0.021292558322317887	0.00789501	.
chr9	101072367	101078408	UMR_77226|286|286|586|37851|0.015481757417241289	0.00653623	.
chr9	102714594	102720451	UMR_77311|181|181|1565|27351|0.05721911447479069	0.00714929	.
chr9	106451949	106457406	UMR_77493|156|156|1431|17332|0.08256404338795292	0.00599003	.
chr9	107626353	107636076	UMR_77574|232|232|3411|33111|0.10301712421853765	0.0172002	.
chr9	107696943	107702178	UMR_77584|89|89|1880|14218|0.13222675481783655	0.0640818	.
chr9	112226016	112237101	UMR_77780|176|176|2876|21764|0.13214482631869143	0.0269854	.
chr9	114559431	114565518	UMR_77852|402|402|979|60152|0.016275435563239793	0.00647301	.
chr9	115306271	115311528	UMR_77894|248|248|621|34908|0.0177896184255758	0.00684977	.
chr9	118475271	118481557	UMR_78014|272|272|866|40872|0.021188099432374242	0.00627952	.
chr9	120930648	120937010	UMR_78169|264|264|2105|31180|0.06751122514432328	0.00826413	.
chr9	121312074	121317278	UMR_78194|76|76|1364|10567|0.1290811015425381	0.0708033	.
chr9	122567539	122574500	UMR_78286|284|284|892|39033|0.02285245817641483	0.00702556	.
chr9	123897910	123926536	UMR_78328|169|169|326|16100|0.020248447204968944	0.0078458	.
chr9	124416344	124426122	UMR_78333|302|303|378|42015|0.00899678686183506	0.0054429	.
chrX	9198769	9204080	UMR_78427|157|157|239|10787|0.022156299249096133	0.00680272	.
chrX	10716669	10721939	UMR_78458|159|159|205|12835|0.01597195169458512	0.00462963	.
chrX	11490025	11495127	UMR_78494|102|102|701|6441|0.10883403198261139	0.0112876	.
chrX	11998117	12009542	UMR_78538|407|407|1448|28414|0.050960793974801154	0.0130719	.
chrX	12065523	12075039	UMR_78543|174|174|1731|12761|0.13564767651437976	0.0738865	.
chrX	12076361	12082063	UMR_78544|450|450|491|27026|0.018167690372234147	0.00584795	.
chrX	12086488	12092760	UMR_78547|424|424|418|26419|0.01582194632650744	0.00595238	.
chrX	12132883	12138176	UMR_78551|272|281|1017|17610|0.05775127768313458	0.0132697	.
chrX	12155133	12160815	UMR_78555|277|277|980|17640|0.05555555555555555	0.0107527	.
chrX	20793793	20799336	UMR_78660|51|51|349|3014|0.11579296615792967	0.0070922	.
chrX	36193009	36198216	UMR_78691|82|82|686|5356|0.1280806572068708	0.0343436	.
chrX	37046783	37053408	UMR_78719|173|173|1330|13904|0.09565592635212888	0.0196966	.
chrX	42148471	42154122	UMR_78768|258|258|249|14060|0.01770981507823613	0.00520833	.
chrX	48340336	48346490	UMR_78828|384|384|452|19476|0.023208050934483467	0.00560264	.
chrX	51677597	51684963	UMR_78896|201|201|1086|14758|0.07358720693860957	0.00741107	.
chrX	52742542	52754457	UMR_78933|142|142|939|9904|0.09481017770597738	0.0196775	.
chrX	53607048	53612892	UMR_78956|52|62|544|3678|0.14790647090810222	0.0218571	.
chrX	56729878	56734880	UMR_78981|151|151|356|7811|0.04557675073614134	0.00641026	.
chrX	57914959	57924138	UMR_79010|221|221|1515|14695|0.10309629125552909	0.0549246	.
chrX	58026451	58034882	UMR_79017|288|288|1378|23331|0.05906304916205906	0.00813187	.
chrX	60542147	60548664	UMR_79047|172|172|361|10083|0.03580283645740355	0.00961928	.
chrX	60887893	60900252	UMR_79064|491|491|991|33142|0.02990163538712208	0.00628931	.
chrX	66645455	66654496	UMR_79079|113|113|411|8125|0.05058461538461539	0.00823413	.
chrX	69359378	69364683	UMR_79093|120|120|321|9755|0.03290620194771912	0.00610707	.
chrX	71048347	71055479	UMR_79115|184|184|447|13801|0.03238895732193319	0.00701754	.
chrX	71660505	71670922	UMR_79129|228|228|1560|18297|0.0852598786686342	0.0172708	.
chrX	73963859	73969596	UMR_79176|174|174|177|12358|0.014322705939472406	0.00564972	.
chrX	74243797	74250546	UMR_79183|153|155|615|11367|0.05410398522037477	0.0089822	.
chrX	77507961	77513582	UMR_79228|193|193|179|10945|0.0163544997715852	0.00694444	.
chrX	93279445	93302786	UMR_79280|615|615|671|44931|0.014934009926331485	0.00803213	.
chrX	94540188	94545466	UMR_79313|160|167|327|9099|0.035938015166501816	0.0070922	.
chrX	95162381	95167470	UMR_79326|65|65|281|4334|0.06483617904937702	0.0169263	.
chrX	99134849	99153974	UMR_79362|372|372|1847|29906|0.061760181903297	0.0123815	.
chrX	101298431	101305020	UMR_79442|121|121|1012|6687|0.15133841782563182	0.0555556	.
chrX	101637645	101643665	UMR_79453|127|127|606|9109|0.06652761005598858	0.00574713	.
chrX	102249083	102254802	UMR_79474|273|273|265|19755|0.013414325487218427	0.00469484	.
chrX	104197093	104202815	UMR_79516|257|257|401|16192|0.024765316205533596	0.00813008	.
chrX	110809513	110817901	UMR_79574|177|177|291|13306|0.021869833157973848	0.00709943	.
chrX	120289229	120294384	UMR_79597|149|150|96|10282|0.009336704921221552	0.00483092	.
chrX	133655681	133661446	UMR_79636|42|42|624|2891|0.21584226911103424	0.120775	.
chrX	133681330	133693654	UMR_79638|373|373|791|27231|0.02904777643127318	0.0070922	.
chrX	134294965	134300512	UMR_79654|65|65|353|4665|0.07566988210075026	0.0133587	.
chrX	137096237	137128628	UMR_79721|576|697|1366|32997|0.04139770282146862	0.0138889	.
chrX	141717620	141730186	UMR_79779|290|290|706|22182|0.03182760797042647	0.00784531	.
chrX	142679869	142687091	UMR_79798|181|181|1023|8696|0.11764029438822447	0.00529101	.
chrX	152143759	152148999	UMR_79884|151|151|653|10172|0.0641958316948486	0.00656958	.
chrX	153496962	153503202	UMR_79909|188|189|152|12699|0.011969446413103393	0.00469484	.
chrX	158918653	158925808	UMR_79948|76|76|410|5050|0.08118811881188119	0.0252041	.
chrX	160991469	160996984	UMR_79990|147|147|180|10563|0.017040613462084634	0.00505051	.
chrX	166343646	166352250	UMR_80095|73|73|449|4642|0.0967255493321844	0.0188679	.
chrX	166802577	166809778	UMR_80110|40|40|645|2826|0.22823779193205945	0.143407	.
chrX	169879107	169884426	UMR_80153|94|94|376|6864|0.054778554778554776	0.00617284	.

## Sheet: P0 cKO, DMVs
chrom	start	end	name	score	strand
chr1	4489015	4499996	UMR_5|310|310|457|16337|0.027973312113607148	0.0111597	.
chr1	5017820	5025703	UMR_16|243|243|414|12293|0.03367770275766697	0.00666667	.
chr1	13123884	13130251	UMR_119|179|179|546|9580|0.0569937369519833	0.0224232	.
chr1	19095949	19113510	UMR_201|264|266|337|11378|0.029618562137458254	0.0120671	.
chr1	19204929	19245718	UMR_202|605|605|935|25299|0.036957982528953714	0.0147812	.
chr1	23761124	23766355	UMR_289|187|187|142|9350|0.015187165775401069	0.00653595	.
chr1	24611504	24617017	UMR_325|76|80|1596|24163|0.06605140090220585	0.0622882	.
chr1	41151871	41159040	UMR_757|93|93|543|4187|0.12968712682111297	0.0512821	.
chr1	41808787	41815489	UMR_782|71|71|354|2865|0.12356020942408377	0.0571497	.
chr1	41887511	41892968	UMR_785|75|75|366|3497|0.10466113811838719	0.0654762	.
chr1	42255634	42263200	UMR_798|102|102|461|4763|0.09678773882007138	0.0199049	.
chr1	42538351	42544390	UMR_810|98|98|438|4632|0.09455958549222798	0.0146751	.
chr1	42677279	42715184	UMR_817|979|983|578|40551|0.014253655890113685	0.00617284	.
chr1	55886203	55891710	UMR_1041|84|84|678|4141|0.1637285679787491	0.125245	.
chr1	56959891	56985228	UMR_1080|639|639|1378|30207|0.045618565233224086	0.0121212	.
chr1	59480255	59486031	UMR_1193|301|301|378|15536|0.02433058702368692	0.010101	.
chr1	62700767	62709226	UMR_1299|295|295|674|14121|0.0477303307131223	0.00828445	.
chr1	63246655	63253768	UMR_1329|152|152|1153|7462|0.15451621549182526	0.0232968	.
chr1	63271179	63280020	UMR_1334|227|227|754|9482|0.07951908879983126	0.00980392	.
chr1	69684353	69689550	UMR_1470|173|174|234|6129|0.0381791483113069	0	.
chr1	72532109	72537914	UMR_1554|124|124|705|6414|0.10991580916744621	0.00813008	.
chr1	72869863	72876580	UMR_1575|205|205|144|9825|0.01465648854961832	0.00740741	.
chr1	74768793	74777140	UMR_1640|211|211|531|8835|0.060101867572156194	0.00952381	.
chr1	74787123	74808892	UMR_1642|446|446|1118|20366|0.0548954139251694	0.0133333	.
chr1	74853957	74859959	UMR_1646|296|296|414|14323|0.02890455910074705	0.00822854	.
chr1	74880587	74902746	UMR_1647|531|535|1688|26583|0.06349922883045556	0.0125786	.
chr1	74947757	74952899	UMR_1650|281|281|510|15967|0.031940878061000814	0.0126996	.
chr1	75442699	75451137	UMR_1683|179|179|451|7863|0.05735724278265293	0.0204255	.
chr1	77493404	77499533	UMR_1793|56|56|270|2666|0.10127531882970743	0.056701	.
chr1	77501146	77517584	UMR_1794|371|371|1010|17105|0.05904706226249635	0.0107639	.
chr1	78138496	78144012	UMR_1823|79|79|306|3300|0.09272727272727273	0.0151515	.
chr1	78186857	78204630	UMR_1829|500|503|857|21613|0.0396520612594272	0.0142784	.
chr1	78207665	78219853	UMR_1830|327|327|981|15510|0.063249516441005807	0.00925926	.
chr1	82282491	82287492	UMR_1915|98|98|260|4096|0.0634765625	0.0251247	.
chr1	85894085	85900062	UMR_2000|131|131|579|6399|0.09048288795124239	0.01192	.
chr1	86524593	86532765	UMR_2037|423|432|339|20615|0.01644433664807179	0.00694444	.
chr1	87152350	87157532	UMR_2057|253|253|611|14609|0.04182353343829146	0.0106491	.
chr1	89921081	89937208	UMR_2208|560|561|970|27027|0.03589003589003589	0.00913413	.
chr1	106170879	106177399	UMR_2500|286|286|177|14082|0.012569237324243716	0.00505051	.
chr1	119047331	119055094	UMR_2585|271|272|265|11597|0.022850737259636114	0.00584795	.
chr1	119418148	119424572	UMR_2605|345|351|322|13733|0.023447171047840967	0.00641026	.
chr1	120340011	120345506	UMR_2645|217|217|475|12627|0.03761780312029778	0.0112994	.
chr1	120590336	120618126	UMR_2655|680|680|1131|33285|0.03397926994141505	0.0122419	.
chr1	128589877	128596994	UMR_2825|203|203|385|9736|0.03954396055875103	0.00694444	.
chr1	131523075	131529364	UMR_2902|253|253|186|12061|0.01542160683193765	0.00574713	.
chr1	133129323	133134627	UMR_3035|180|180|654|10535|0.062078785002373044	0.0103525	.
chr1	134399878	134406676	UMR_3139|58|137|155|3103|0.04995165968417661	0.00944245	.
chr1	136228441	136235432	UMR_3266|155|155|778|7249|0.10732514829631673	0.0151515	.
chr1	136944450	136954658	UMR_3299|260|260|275|13009|0.021139211315243295	0.0113664	.
chr1	137897701	137904658	UMR_3327|80|80|119|2878|0.041348158443363446	0.00877193	.
chr1	138835981	138850052	UMR_3363|363|363|1084|16432|0.06596884128529698	0.0165756	.
chr1	146493895	146499250	UMR_3417|88|88|273|4277|0.06382978723404255	0.00653595	.
chr1	151342391	151347594	UMR_3477|200|200|318|9975|0.0318796992481203	0.00666933	.
chr1	155082273	155087656	UMR_3682|158|158|433|6168|0.07020103761348898	0.0128395	.
chr1	155727772	155745213	UMR_3731|455|455|430|21531|0.019971204310064557	0.00653595	.
chr1	161033564	161040782	UMR_3911|141|141|175|5581|0.031356387744131874	0.0070922	.
chr1	163308625	163315465	UMR_3978|200|200|648|9463|0.06847722709500159	0.0170061	.
chr1	166278674	166284810	UMR_4072|71|71|448|3788|0.11826821541710665	0.0739791	.
chr1	167687245	167696509	UMR_4140|301|301|572|15001|0.03813079128058129	0.00952381	.
chr1	168381495	168387168	UMR_4195|66|66|459|3027|0.15163528245787908	0.0894005	.
chr1	168422877	168432974	UMR_4201|168|171|234|6320|0.037025316455696206	0.00775194	.
chr1	171032493	171039228	UMR_4288|184|184|516|8065|0.06398016119032858	0.00775194	.
chr1	171063744	171086362	UMR_4292|179|1057|709|5084|0.1394571203776554	0.0555556	.
chr1	171246499	171252715	UMR_4306|126|127|636|6163|0.10319649521337011	0.0349813	.
chr1	172024053	172029278	UMR_4337|142|142|142|5546|0.02560403894698882	0.00804264	.
chr1	172200479	172207720	UMR_4347|115|115|162|5282|0.030670200681560015	0.00877193	.
chr1	172481242	172487116	UMR_4377|137|137|824|6481|0.1271408733220182	0.0261613	.
chr1	172499537	172504668	UMR_4379|142|142|925|6642|0.1392652815417043	0.0230085	.
chr1	177440235	177463544	UMR_4488|528|531|1563|21082|0.07413907598899536	0.0106673	.
chr1	184714003	184738790	UMR_4824|599|600|803|28041|0.028636639206875647	0.013213	.
chr1	187603155	187611048	UMR_4947|284|285|404|14036|0.028783129096608722	0.0155039	.
chr1	190167719	190175886	UMR_5087|331|331|456|14351|0.03177478921329524	0.0138889	.
chr1	192850823	192857308	UMR_5203|224|224|516|10818|0.04769828064337216	0.00877193	.
chr1	194618485	194623539	UMR_5264|155|155|217|8565|0.025335668417980153	0.00724638	.
chr10	9673701	9678738	UMR_5472|189|189|369|10447|0.035321144826265916	0.00694444	.
chr10	9896989	9902520	UMR_5479|206|206|325|10245|0.0317227916056613	0.00628931	.
chr10	13963873	13969904	UMR_5585|316|316|212|11294|0.01877102886488401	0.00564972	.
chr10	19351371	19364102	UMR_5708|272|272|396|13376|0.029605263157894735	0.0170216	.
chr10	22148210	22160422	UMR_5813|426|431|186|13080|0.014220183486238533	0.00546448	.
chr10	22811535	22823754	UMR_5832|249|251|370|11637|0.03179513620348887	0.0111111	.
chr10	22838727	22846125	UMR_5833|88|88|344|3930|0.08753180661577609	0.0258838	.
chr10	28073329	28078726	UMR_5951|167|167|173|8525|0.02029325513196481	0	.
chr10	29142557	29148610	UMR_5965|188|189|213|8298|0.02566883586406363	0.00724638	.
chr10	29532499	29540468	UMR_5973|145|145|336|6393|0.05255748474894416	0.010101	.
chr10	37134757	37141926	UMR_6055|384|384|130|15588|0.00833974852450603	0.00666667	.
chr10	42273724	42279103	UMR_6218|395|395|377|18399|0.020490244035001902	0.00653595	.
chr10	42577121	42593314	UMR_6239|533|533|746|26761|0.02787638727999701	0.00757576	.
chr10	42630426	42637628	UMR_6241|257|257|444|10746|0.0413176996091569	0.0140366	.
chr10	43170559	43176023	UMR_6289|248|248|298|10468|0.0284677111196026	0.0067402	.
chr10	44525734	44531606	UMR_6356|142|142|199|6609|0.030110455439552125	0.0126996	.
chr10	44995744	45001194	UMR_6365|65|65|498|2375|0.20968421052631578	0.0745921	.
chr10	45468001	45474300	UMR_6384|99|99|447|3869|0.11553372964590333	0.0400427	.
chr10	49781221	49789960	UMR_6413|144|144|398|7287|0.054617812542884586	0.00724638	.
chr10	50889977	50912718	UMR_6420|526|526|900|25766|0.034929752386866415	0.0104993	.
chr10	52020163	52030538	UMR_6436|239|239|456|11639|0.03917862359309219	0.00980392	.
chr10	56373083	56380468	UMR_6483|141|141|492|5841|0.08423215202876219	0.0123457	.
chr10	59322390	59327536	UMR_6559|134|134|298|5526|0.05392689106044155	0.00925926	.
chr10	62127571	62138555	UMR_6779|264|264|716|12906|0.055478072214473886	0.015873	.
chr10	63020822	63027157	UMR_6830|214|214|162|9404|0.01722671203743088	0.00494505	.
chr10	67534355	67541331	UMR_6964|333|333|703|17018|0.041309202021389116	0.0100256	.
chr10	68274891	68283556	UMR_7009|249|249|373|9646|0.0386688782915198	0.00757576	.
chr10	70094092	70099720	UMR_7106|242|242|355|10085|0.03520079325731284	0.0064731	.
chr10	73096337	73101399	UMR_7208|198|198|285|9606|0.02966895690193629	0.00628931	.
chr10	79852043	79858938	UMR_7453|241|241|831|13443|0.06181655880383843	0.00555556	.
chr10	79915893	79922166	UMR_7465|235|235|662|11832|0.055949966193373904	0.0221311	.
chr10	79983385	79991358	UMR_7474|322|322|1578|16113|0.0979333457456712	0.00910442	.
chr10	80147478	80153444	UMR_7490|304|304|167|12523|0.013335462748542682	0.00546448	.
chr10	80487482	80506833	UMR_7547|531|532|651|24501|0.02657034406758908	0.0118449	.
chr10	80928454	80940364	UMR_7596|427|427|1022|20209|0.050571527537235886	0.00793651	.
chr10	81133909	81139096	UMR_7620|330|330|289|10861|0.026608967866678945	0.00966387	.
chr10	81172979	81178003	UMR_7622|182|182|635|10246|0.06197540503611165	0.00520833	.
chr10	81568298	81576298	UMR_7692|185|185|824|8816|0.09346642468239565	0.0151515	.
chr10	84435866	84442726	UMR_7817|223|223|553|10760|0.051394052044609666	0.00925926	.
chr10	84754410	84760974	UMR_7832|316|316|747|15344|0.04868352450469239	0.0133333	.
chr10	86777832	86783398	UMR_7916|153|153|704|8007|0.08792306731609842	0.0123457	.
chr10	87487865	87495756	UMR_7950|252|252|424|11507|0.03684713652559312	0.00732689	.
chr10	91167249	91172524	UMR_8069|240|240|527|11494|0.0458500087001914	0.0070922	.
chr10	92160695	92166676	UMR_8118|89|90|203|3354|0.0605247465712582	0.00775194	.
chr10	93160053	93167012	UMR_8164|223|223|221|7887|0.02802079371117028	0.00757576	.
chr10	94940140	94946471	UMR_8283|297|297|285|14552|0.019584936778449698	0.00666667	.
chr10	96615960	96621812	UMR_8377|190|196|201|7331|0.027417814759241578	0.00877193	.
chr10	99260791	99266602	UMR_8441|267|267|235|13934|0.016865221759724415	0.00666667	.
chr10	100015215	100020564	UMR_8478|153|153|288|7570|0.038044914134742404	0.0070922	.
chr10	103024863	103037152	UMR_8520|250|250|374|10175|0.036756756756756756	0.00901559	.
chr10	117147469	117152895	UMR_8881|200|200|389|8295|0.04689572031344183	0.0143418	.
chr10	120471824	120479250	UMR_9059|320|320|215|12858|0.01672110748172344	0.00537634	.
chr10	120849823	120855300	UMR_9090|98|98|742|4483|0.16551416462190496	0.0675505	.
chr10	126926547	126931937	UMR_9342|107|107|518|5311|0.09753342120128036	0.0285408	.
chr10	127076091	127082459	UMR_9358|242|242|632|9216|0.0685763888888889	0.011496	.
chr10	127507713	127514858	UMR_9384|235|235|537|11536|0.0465499306518724	0.0100393	.
chr10	127523915	127537280	UMR_9387|370|372|722|16304|0.044283611383709516	0.0171053	.
chr10	127661102	127669509	UMR_9394|290|290|1460|12831|0.1137869222975606	0.0362472	.
chr11	3288181	3294358	UMR_9477|287|288|239|15526|0.015393533427798532	0.00564972	.
chr11	5440292	5445916	UMR_9599|233|233|259|10743|0.024108721958484593	0.00793651	.
chr11	6063929	6068951	UMR_9636|235|235|496|10316|0.04808065141527724	0.00925926	.
chr11	7211091	7216110	UMR_9680|210|210|640|10583|0.06047434564868185	0.0103766	.
chr11	12032722	12040035	UMR_9763|287|287|624|11609|0.05375139977603583	0.0123457	.
chr11	16256831	16262317	UMR_9783|131|131|458|6294|0.07276771528439784	0.00833333	.
chr11	18747653	18752942	UMR_9828|62|62|400|2824|0.141643059490085	0.11796	.
chr11	18868863	18880486	UMR_9830|307|308|296|11747|0.025197922873925256	0.00775194	.
chr11	19007575	19028592	UMR_9838|525|525|2552|26068|0.09789780573883688	0.0480062	.
chr11	21991167	22010568	UMR_9939|716|716|477|34396|0.013867891615304105	0.00793651	.
chr11	22075277	22081734	UMR_9944|55|55|336|2371|0.1417123576549979	0.0906508	.
chr11	24072029	24101517	UMR_9993|640|640|1360|26140|0.05202754399387911	0.00775194	.
chr11	25852701	25857716	UMR_10060|66|66|263|3049|0.08625778943916038	0.0375347	.
chr11	26582490	26587600	UMR_10076|39|39|317|1818|0.17436743674367436	0.0877838	.
chr11	33192929	33206743	UMR_10220|547|547|922|28414|0.03244879284859576	0.0130719	.
chr11	40690211	40695280	UMR_10514|141|141|303|7321|0.0413877885534763	0.00775194	.
chr11	42419098	42426042	UMR_10531|107|107|461|3878|0.1188757091284167	0.0166667	.
chr11	44610517	44622666	UMR_10598|338|338|673|16199|0.041545774430520405	0.0113044	.
chr11	48852688	48859571	UMR_10721|215|215|256|11532|0.022199098161637183	0.00641026	.
chr11	51854755	51859898	UMR_10828|273|273|207|8355|0.024775583482944345	0	.
chr11	57826747	57841972	UMR_11072|400|400|1141|20079|0.056825539120474125	0.0219272	.
chr11	59287795	59293173	UMR_11137|215|215|373|9947|0.037498743339700415	0.0107527	.
chr11	63916703	63925972	UMR_11336|431|431|628|22531|0.027872708712440637	0.00775194	.
chr11	68382437	68387592	UMR_11508|325|325|212|16210|0.013078346699568168	0.00680272	.
chr11	69058465	69064594	UMR_11544|277|277|288|14187|0.02030027489955593	0.00606061	.
chr11	69094489	69100562	UMR_11550|184|184|322|10211|0.031534619527960044	0.00666667	.
chr11	69117076	69127104	UMR_11552|375|375|724|17959|0.04031404866640682	0.00724638	.
chr11	69364555	69372883	UMR_11571|274|280|378|10846|0.03485155817813019	0.00775194	.
chr11	69394351	69400075	UMR_11573|260|266|1741|11494|0.15147033234731164	0.093951	.
chr11	69408309	69422034	UMR_11575|455|457|899|20171|0.04456893560061474	0.00680272	.
chr11	69799212	69806031	UMR_11607|276|276|406|13874|0.029263370332996974	0.0100529	.
chr11	69833637	69839333	UMR_11608|215|219|343|8154|0.04206524405199902	0.00813008	.
chr11	70017662	70024676	UMR_11627|141|141|588|4824|0.12189054726368159	0.0104167	.
chr11	75164778	75174480	UMR_11814|621|621|780|29870|0.026113157013726147	0.00980392	.
chr11	76382389	76389734	UMR_11914|93|93|771|4562|0.16900482244629547	0.10159	.
chr11	77867081	77873403	UMR_12006|77|78|711|3639|0.1953833470733718	0.0763889	.
chr11	77892397	77897879	UMR_12011|82|82|453|3858|0.11741835147744946	0.0215136	.
chr11	77930315	77935606	UMR_12019|177|177|451|9591|0.04702325096444583	0.00666667	.
chr11	83848600	83856717	UMR_12333|256|256|363|12079|0.03005215663548307	0.0122458	.
chr11	84512802	84530738	UMR_12364|596|596|674|32339|0.02084170815424101	0.00803329	.
chr11	85826994	85845334	UMR_12444|765|765|937|40284|0.023259855029292027	0.0107527	.
chr11	85885479	85896978	UMR_12448|300|300|798|15506|0.05146394943892687	0.0192746	.
chr11	88581158	88589357	UMR_12640|114|114|622|5584|0.11138968481375358	0.0350031	.
chr11	89297591	89304078	UMR_12694|340|341|144|12519|0.011502516175413372	0.00617284	.
chr11	90387733	90393130	UMR_12749|185|185|568|6692|0.08487746563060371	0.00775194	.
chr11	93096610	93101630	UMR_12781|188|188|151|8368|0.01804493307839388	0.00757576	.
chr11	94468341	94476613	UMR_12842|225|226|597|8411|0.0709784805611699	0.0144928	.
chr11	94988909	94994482	UMR_12875|253|253|350|12421|0.02817808550036229	0.00574713	.
chr11	95118163	95127184	UMR_12891|283|283|1173|13438|0.08728977526417622	0.019681	.
chr11	95140787	95146656	UMR_12893|196|196|529|9906|0.05340197859882899	0.0117201	.
chr11	95147518	95153513	UMR_12894|106|106|377|5534|0.0681243223707987	0.0229388	.
chr11	95410935	95416871	UMR_12916|115|115|351|3906|0.08986175115207373	0.00813008	.
chr11	95829379	95835759	UMR_12952|203|203|893|10986|0.0812852721645731	0.0397719	.
chr11	96001179	96013190	UMR_12964|367|367|461|12170|0.037880032867707476	0.00694444	.
chr11	96168187	96207140	UMR_12975|660|660|1706|30995|0.05504113566704307	0.019993	.
chr11	96250062	96357084	UMR_12978|2743|2746|2780|114356|0.024310049319668403	0.0125966	.
chr11	96362711	96376708	UMR_12979|199|199|1053|9498|0.11086544535691725	0.0346896	.
chr11	96872197	96877318	UMR_13031|106|106|336|4366|0.07695831424644985	0.0130946	.
chr11	97017016	97023574	UMR_13053|261|262|538|12851|0.041864446346587814	0.0104993	.
chr11	97566523	97577246	UMR_13114|279|279|882|10500|0.084	0.0138889	.
chr11	97626007	97632357	UMR_13121|311|311|695|15472|0.04491985522233712	0.0112994	.
chr11	97659449	97665112	UMR_13123|292|306|304|10132|0.030003947887879984	0.00694746	.
chr11	98294103	98299394	UMR_13171|123|125|502|5663|0.08864559420801696	0.017094	.
chr11	98313154	98331064	UMR_13172|492|495|643|22209|0.02895222657481201	0.00740741	.
chr11	98332984	98343191	UMR_13173|269|270|1003|11572|0.08667473211199447	0.0141844	.
chr11	98345093	98350910	UMR_13174|163|163|377|7343|0.05134141359117527	0.016616	.
chr11	98739681	98752227	UMR_13213|277|278|698|9664|0.07222682119205298	0.0123457	.
chr11	98927599	98933482	UMR_13236|102|102|783|4657|0.1681339918402405	0.137428	.
chr11	98959201	98967034	UMR_13241|230|231|810|10709|0.0756373144084415	0.0202206	.
chr11	101168812	101178902	UMR_13371|348|349|1556|17026|0.09138963937507341	0.0143386	.
chr11	101259479	101266510	UMR_13380|216|218|400|9818|0.04074149521287431	0.0138889	.
chr11	102315629	102321126	UMR_13489|415|427|144|16191|0.008893829905503057	0	.
chr11	102444663	102449939	UMR_13502|161|161|426|6595|0.06459438968915845	0.015882	.
chr11	102602417	102611944	UMR_13511|311|311|420|12998|0.03231266348669026	0.00666667	.
chr11	103358430	103364580	UMR_13572|282|282|555|15154|0.036623993665038934	0.0114943	.
chr11	103770225	103775854	UMR_13589|189|189|397|9716|0.0408604363935776	0.0128205	.
chr11	104230101	104235524	UMR_13627|261|261|346|12787|0.02705873152420427	0.00666667	.
chr11	104437543	104443466	UMR_13639|206|207|107|7331|0.014595553130541537	0	.
chr11	107468343	107473740	UMR_13763|184|184|465|8955|0.051926298157453935	0.00680272	.
chr11	108919867	108925618	UMR_13853|309|309|168|11503|0.014604885681996001	0	.
chr11	112779505	112789008	UMR_14030|349|349|375|14325|0.02617801047120419	0.00813008	.
chr11	115317316	115323830	UMR_14312|233|233|1489|11681|0.127471963016865	0.0664707	.
chr11	115509997	115515041	UMR_14334|117|117|211|6228|0.033879254977520874	0.00628931	.
chr11	116917440	116922828	UMR_14454|205|205|387|9280|0.04170258620689655	0.010582	.
chr11	117264032	117269636	UMR_14498|163|163|802|7886|0.10169921379660157	0.0114943	.
chr11	117962771	117970613	UMR_14584|309|309|817|16832|0.048538498098859316	0.00913242	.
chr11	119033769	119038856	UMR_14683|197|197|496|9077|0.054643604715214275	0.0276361	.
chr11	119039260	119060175	UMR_14684|787|787|1243|37279|0.03334316907642372	0.0114169	.
chr11	119080747	119092222	UMR_14687|551|551|2219|25239|0.0879194896786719	0.0181818	.
chr11	119545429	119551674	UMR_14732|301|301|390|15457|0.025231286795626577	0.00833333	.
chr11	120184393	120190786	UMR_14783|299|299|626|14143|0.04426217916990737	0.0114943	.
chr11	120228673	120243444	UMR_14788|699|699|1327|33309|0.03983908253024708	0.00740741	.
chr12	8296517	8303546	UMR_15021|330|330|570|17462|0.032642309013858666	0.0118021	.
chr12	8495927	8501058	UMR_15036|207|207|379|11838|0.03201554316607535	0.00641026	.
chr12	9569266	9585636	UMR_15063|364|364|399|18956|0.021048744460856722	0.0108245	.
chr12	12935755	12943854	UMR_15144|318|319|418|14915|0.02802547770700637	0.00629155	.
chr12	15810351	15817666	UMR_15198|246|246|235|11816|0.019888287068381857	0.00617284	.
chr12	16799695	16806233	UMR_15231|107|110|362|3763|0.09619984055275047	0.0129402	.
chr12	20605717	20617436	UMR_15311|55|196|17|607|0.02800658978583196	0.0222222	.
chr12	25092175	25101852	UMR_15390|386|386|298|15352|0.019411151641479937	0.00617496	.
chr12	27059723	27065868	UMR_15485|78|78|87|3334|0.026094781043791242	0.0184624	.
chr12	27333811	27344900	UMR_15499|457|457|339|19672|0.017232614884099228	0.00606061	.
chr12	29526030	29539808	UMR_15605|190|190|727|7798|0.09322903308540652	0.0146285	.
chr12	33952781	33969546	UMR_15781|451|451|417|18894|0.022070498570974914	0.00833333	.
chr12	49371367	49410704	UMR_16011|759|764|734|29997|0.02446911357802447	0	.
chr12	50108466	50123474	UMR_16023|107|107|198|4241|0.04668710209856166	0.00740741	.
chr12	50189821	50198016	UMR_16025|47|47|253|1836|0.1377995642701525	0.0463975	.
chr12	53060648	53066312	UMR_16137|54|54|219|2111|0.10374230222643296	0.0335356	.
chr12	53246078	53255150	UMR_16143|367|370|551|12662|0.04351603222239773	0.00813008	.
chr12	55123867	55239306	UMR_16238|27|1211|0|378|0	0	.
chr12	56518588	56541572	UMR_16285|623|628|1135|30609|0.03708059720997092	0.0112243	.
chr12	56607506	56618882	UMR_16288|215|215|416|9898|0.042028692665184886	0.0112053	.
chr12	56685235	56702086	UMR_16294|462|462|573|23437|0.024448521568460127	0.0128977	.
chr12	57533803	57555124	UMR_16320|675|675|807|29712|0.02716074313408724	0.010929	.
chr12	61521043	61528034	UMR_16366|174|174|292|8167|0.03575364270846088	0.00680272	.
chr12	70107837	70114084	UMR_16475|207|207|980|10669|0.09185490673915081	0.0116995	.
chr12	72936113	72947930	UMR_16648|338|338|515|15178|0.033930689155356436	0.0107527	.
chr12	73034551	73055891	UMR_16651|640|640|593|31092|0.019072430207127237	0.0107527	.
chr12	76367017	76372260	UMR_16777|326|326|283|14636|0.01933588412134463	0.00600649	.
chr12	80108468	80116784	UMR_16939|378|378|223|13975|0.01595706618962433	0	.
chr12	81855915	81862978	UMR_17023|252|252|896|10067|0.08900367537498759	0.00833333	.
chr12	83484451	83489685	UMR_17099|237|237|128|12510|0.010231814548361312	0.00520833	.
chr12	85471540	85476640	UMR_17213|221|221|420|9733|0.0431521627452995	0.00584795	.
chr12	86879477	86886630	UMR_17325|328|334|267|14753|0.01809801396326171	0.00529101	.
chr12	86890514	86898804	UMR_17327|171|171|365|6853|0.05326134539617686	0.00740741	.
chr12	89811187	89818800	UMR_17397|103|104|546|5480|0.09963503649635036	0.0215401	.
chr12	95690302	95697826	UMR_17494|227|227|340|11057|0.030749751288776342	0.00653595	.
chr12	98733613	98739106	UMR_17551|174|174|607|9019|0.06730236168089589	0.00740741	.
chr12	104468485	104479589	UMR_17817|393|393|556|19053|0.029181756153886528	0.00952381	.
chr12	105957963	105963744	UMR_17921|140|140|446|5911|0.07545254610049061	0.0198998	.
chr12	107927755	107932885	UMR_18062|106|106|535|5420|0.09870848708487084	0.0223918	.
chr12	107969411	107981922	UMR_18068|315|315|2671|14572|0.18329673346143288	0.133573	.
chr12	107999929	108006884	UMR_18072|343|343|608|14314|0.04247589772250943	0.00952381	.
chr12	108272192	108278831	UMR_18099|328|328|452|19880|0.0227364185110664	0.00813008	.
chr12	109449139	109454800	UMR_18177|176|176|241|6501|0.03707121981233656	0.0111111	.
chr12	110186157	110192246	UMR_18224|164|165|140|8780|0.015945330296127564	0.0104167	.
chr12	110276958	110284396	UMR_18233|391|391|549|19314|0.02842497670083877	0.0123457	.
chr12	111427657	111434901	UMR_18296|133|134|1094|7457|0.1467077913369988	0.10348	.
chr12	111441735	111451304	UMR_18297|256|256|1150|14016|0.08204908675799087	0.0322819	.
chr12	112142819	112147832	UMR_18339|291|291|244|14754|0.016537888030364645	0.00595238	.
chr12	117148284	117161388	UMR_18479|350|350|883|18174|0.04858589193353142	0.0166667	.
chr12	118839490	118844564	UMR_18547|98|98|292|3751|0.07784590775793122	0.0194193	.
chr12	118846085	118856992	UMR_18548|388|388|473|18375|0.025741496598639457	0.00680272	.
chr12	119234687	119240016	UMR_18552|91|91|169|4942|0.03419668150546337	0.00555556	.
chr13	15461305	15475136	UMR_18710|316|318|904|14654|0.06168964105363723	0.00952381	.
chr13	15541497	15557169	UMR_18714|140|140|1218|6742|0.18065855829130822	0.137774	.
chr13	15616684	15622723	UMR_18719|65|65|512|3233|0.1583668419424683	0.124024	.
chr13	21157747	21163037	UMR_18811|112|112|246|5897|0.04171612684415805	0.0106076	.
chr13	21778652	21788852	UMR_18847|228|285|466|8530|0.05463071512309496	0.00595238	.
chr13	21801154	21813261	UMR_18849|60|321|10|1052|0.009505703422053232	0	.
chr13	21830823	21842266	UMR_18850|38|291|17|448|0.03794642857142857	0	.
chr13	21993656	21999974	UMR_18867|125|125|295|5154|0.05723709740007761	0.0267094	.
chr13	23430027	23439160	UMR_18893|211|211|712|9385|0.07586574320724561	0.00980392	.
chr13	23529894	23537084	UMR_18908|192|248|192|7293|0.02632661456190868	0.00628931	.
chr13	23570039	23577657	UMR_18913|164|273|160|5225|0.03062200956937799	0	.
chr13	23581007	23587291	UMR_18914|134|142|133|4789|0.027771977448319066	0.00624416	.
chr13	23750737	23758116	UMR_18924|124|169|302|4057|0.07443924081833868	0.00520833	.
chr13	28717549	28723024	UMR_19032|82|82|417|4075|0.10233128834355829	0.0509148	.
chr13	28790245	28797617	UMR_19040|67|67|514|2996|0.17156208277703605	0.118018	.
chr13	28881001	28887402	UMR_19050|136|136|753|6647|0.11328418835564917	0.0234179	.
chr13	28946608	28954594	UMR_19052|318|318|253|14883|0.016999260901699925	0.00529101	.
chr13	31611757	31632884	UMR_19131|617|617|677|30535|0.022171278860324217	0.0113124	.
chr13	31799741	31814054	UMR_19137|630|631|1197|31672|0.03779363475625158	0.00966184	.
chr13	34125465	34134730	UMR_19168|184|219|123|8600|0.01430232558139535	0.00740741	.
chr13	35737626	35743196	UMR_19213|272|272|486|12906|0.03765690376569038	0.00666667	.
chr13	36721921	36737252	UMR_19245|438|439|841|17404|0.04832222477591358	0.0104167	.
chr13	37824543	37832530	UMR_19281|294|294|660|12949|0.05096918680979226	0.00775613	.
chr13	40701201	40717594	UMR_19359|364|364|759|15159|0.05006926578270334	0.0125786	.
chr13	40722399	40745550	UMR_19361|786|792|943|33873|0.02783928202403094	0.00952381	.
chr13	41352105	41360730	UMR_19392|137|137|469|7216|0.06499445676274944	0.0167609	.
chr13	42048287	42054830	UMR_19421|289|289|216|10420|0.02072936660268714	0	.
chr13	44729391	44734656	UMR_19616|313|313|183|13244|0.013817577771066143	0.00520833	.
chr13	45960024	45967263	UMR_19693|298|298|320|10952|0.029218407596785977	0.00560264	.
chr13	48259299	48266682	UMR_19834|263|263|301|12767|0.02357640792668599	0.00628931	.
chr13	48653089	48673334	UMR_19857|554|555|1189|28021|0.04243246136825952	0.0114943	.
chr13	51565436	51570877	UMR_19930|199|199|206|10851|0.018984425398580775	0.00617284	.
chr13	51844525	51850086	UMR_19955|252|252|172|12465|0.013798636181307661	0.00584795	.
chr13	52977747	52983296	UMR_20023|341|341|255|16507|0.015447991761071062	0.00584795	.
chr13	53280897	53286734	UMR_20050|183|183|796|9931|0.0801530560870003	0.016369	.
chr13	53461069	53477118	UMR_20057|436|436|1060|20710|0.05118300338000966	0.0128205	.
chr13	54754121	54760782	UMR_20154|139|139|738|6795|0.10860927152317881	0.00877193	.
chr13	54947985	54953258	UMR_20185|219|219|570|9776|0.05830605564648118	0.0070922	.
chr13	55468895	55475699	UMR_20220|276|276|1001|15033|0.06658684228031664	0.00617284	.
chr13	55483381	55488640	UMR_20221|169|169|348|6215|0.05599356395816573	0.010929	.
chr13	55823358	55838236	UMR_20237|548|550|613|26882|0.02280336284502641	0.0102362	.
chr13	56248701	56261398	UMR_20279|372|372|907|16432|0.05519717624148004	0.0137589	.
chr13	60121990	60127022	UMR_20563|101|101|580|5024|0.11544585987261147	0.0448224	.
chr13	60172019	60179066	UMR_20568|335|335|205|16890|0.012137359384251036	0.00584795	.
chr13	63562275	63574789	UMR_20663|552|553|297|24249|0.012247927749597922	0.00617284	.
chr13	69735407	69741229	UMR_20779|275|275|473|12566|0.037641254177940474	0.00628931	.
chr13	71956329	71969348	UMR_20864|454|454|409|21684|0.018861833610035048	0.00813008	.
chr13	72621915	72640707	UMR_20886|616|616|831|32642|0.0254579988971264	0.0104167	.
chr13	73257855	73273817	UMR_20910|507|507|960|25804|0.0372035343357619	0.0136054	.
chr13	77889582	77894768	UMR_20986|35|35|115|1467|0.07839127471029311	0.0608059	.
chr13	78167237	78188454	UMR_20993|285|285|1542|12314|0.12522332304693845	0.0786186	.
chr13	78189799	78212459	UMR_20994|651|664|2389|26757|0.08928504690361401	0.0123457	.
chr13	80881709	80887173	UMR_21028|235|235|106|9503|0.011154372303483111	0.00628931	.
chr13	81627816	81633648	UMR_21039|74|74|366|3411|0.10729991204925242	0.0182683	.
chr13	81942373	81947652	UMR_21052|71|71|487|2803|0.1737424188369604	0.0832491	.
chr13	83522577	83538524	UMR_21076|176|176|1036|6649|0.1558129041961197	0.0651701	.
chr13	83712513	83751134	UMR_21087|770|771|383|32372|0.011831212158655628	0.00497512	.
chr13	83983961	83989470	UMR_21093|47|47|198|1986|0.09969788519637462	0.00793651	.
chr13	84054441	84069210	UMR_21096|106|106|108|4067|0.026555200393410375	0.00925926	.
chr13	84342601	84351291	UMR_21100|184|184|298|8570|0.03477246207701284	0.00793651	.
chr13	84747945	84762652	UMR_21109|108|108|135|3832|0.03522964509394572	0.0163852	.
chr13	89737437	89743755	UMR_21136|174|174|249|8250|0.03018181818181818	0.00623107	.
chr13	93302721	93308292	UMR_21242|218|218|385|9162|0.0420213927090155	0.00570843	.
chr13	94705941	94711806	UMR_21318|160|160|253|6814|0.03712943938949222	0.00981241	.
chr13	94866211	94887314	UMR_21322|691|691|870|28430|0.030601477312697856	0.00694444	.
chr13	97237369	97245038	UMR_21411|233|233|438|11044|0.03965954364360739	0.00617284	.
chr13	97248555	97254112	UMR_21413|80|80|511|3803|0.1343676045227452	0.0798454	.
chr13	98351147	98369544	UMR_21501|597|597|475|27633|0.017189592154308254	0.00724638	.
chr13	98500241	98506962	UMR_21508|204|204|293|8839|0.033148546215635254	0.0104167	.
chr13	99441561	99448588	UMR_21549|102|102|431|5634|0.07649982250621229	0.0258162	.
chr13	99510337	99517164	UMR_21558|194|194|390|7140|0.0546218487394958	0.00952381	.
chr13	101690933	101696397	UMR_21634|124|124|529|5675|0.093215859030837	0.0185467	.
chr13	103917157	103922726	UMR_21721|293|293|131|11971|0.010943112521927994	0.00666667	.
chr13	105441519	105449476	UMR_21769|135|135|478|6685|0.07150336574420343	0.0130719	.
chr13	107886925	107892671	UMR_21839|450|456|216|20507|0.010532988735553713	0.00466223	.
chr13	112985451	112995138	UMR_22057|350|352|483|18288|0.026410761154855644	0.00724638	.
chr13	114455757	114461053	UMR_22139|273|274|298|10610|0.028086710650329878	0.0070922	.
chr13	116292462	116315134	UMR_22180|453|453|437|21200|0.02061320754716981	0.00925926	.
chr13	116704961	116713185	UMR_22187|193|193|298|7749|0.038456575041940895	0.010101	.
chr13	119961661	119979844	UMR_22246|51|364|176|803|0.2191780821917808	0.0666667	.
chr13	119990843	119997018	UMR_22247|9|62|14|67|0.208955223880597	0.125	.
chr13	120020223	120048362	UMR_22249|204|663|170|4656|0.03651202749140894	0.010101	.
chr13	120086965	120101488	UMR_22250|88|266|514|2154|0.23862581244196843	0.0337719	.
chr14	3527151	3657345	UMR_22254|29|895|53|185|0.2864864864864865	0	.
chr14	3743353	3811249	UMR_22255|10|575|5|52|0.09615384615384616	0.0333333	.
chr14	4109507	4115084	UMR_22258|87|114|353|3646|0.0968184311574328	0.0667048	.
chr14	5428131	5472485	UMR_22268|8|307|0|50|0	0	.
chr14	5762797	5819033	UMR_22269|7|390|4|36|0.1111111111111111	0	.
chr14	7103431	7130502	UMR_22280|15|208|0|75|0	0	.
chr14	7223445	7246184	UMR_22281|9|201|3|113|0.02654867256637168	0.047619	.
chr14	11551975	11557119	UMR_22377|270|270|291|14516|0.020046844860843207	0.00673469	.
chr14	12334867	12349506	UMR_22417|402|402|769|19263|0.03992109224939002	0.00966387	.
chr14	12388215	12395092	UMR_22422|83|83|482|3852|0.12512980269989615	0.0454971	.
chr14	14062839	14071818	UMR_22459|87|87|415|3978|0.10432378079436903	0.0541785	.
chr14	21981277	21995978	UMR_22633|661|661|1156|31469|0.03673456417426674	0.0125786	.
chr14	25456512	25464496	UMR_22779|364|364|469|17682|0.026524148851939825	0.0064731	.
chr14	25603756	25609790	UMR_22798|236|238|409|9419|0.04342286866971016	0.00877193	.
chr14	29717497	29723806	UMR_22929|251|254|338|11040|0.03061594202898551	0.00757576	.
chr14	32459780	32466304	UMR_23030|300|300|434|15670|0.02769623484365029	0.01102	.
chr14	39469755	39475420	UMR_23174|250|252|363|10672|0.03401424287856072	0.00529101	.
chr14	46384914	46391035	UMR_23244|273|273|235|11355|0.020695728753852928	0.00925926	.
chr14	46880882	46886174	UMR_23267|290|290|248|13330|0.018604651162790697	0.00574713	.
chr14	48118726	48125452	UMR_23318|222|222|530|9610|0.055150884495317375	0.00803329	.
chr14	48661435	48674956	UMR_23360|419|419|463|17818|0.025984959030194186	0.0117103	.
chr14	51087565	51093716	UMR_23426|161|161|398|7666|0.05191755804852596	0.00980392	.
chr14	52008842	52015970	UMR_23443|215|248|540|7765|0.0695428203477141	0.00854701	.
chr14	52325781	52332606	UMR_23458|91|91|424|3769|0.11249668347041655	0.0247967	.
chr14	54571859	54578650	UMR_23499|270|270|276|13441|0.020534186444460978	0.00757576	.
chr14	58069730	58077143	UMR_23659|381|382|155|17395|0.008910606496119574	0.00606061	.
chr14	59624514	59629542	UMR_23693|181|181|417|9924|0.04201934703748488	0.00595238	.
chr14	63239329	63257494	UMR_23867|518|518|883|26192|0.03371258399511301	0.010929	.
chr14	63260354	63272551	UMR_23868|226|226|467|10287|0.04539710313988529	0.0140429	.
chr14	64581151	64596122	UMR_23955|366|366|1375|14899|0.09228807302503524	0.0151515	.
chr14	67227473	67240814	UMR_24080|450|450|838|24109|0.03475880376622838	0.0131424	.
chr14	69167957	69178006	UMR_24157|203|203|347|10026|0.0346100139636944	0.0153846	.
chr14	70074163	70082304	UMR_24193|454|454|243|17969|0.013523290110746286	0.00740741	.
chr14	70622995	70629920	UMR_24233|125|125|1115|6467|0.1724137931034483	0.140955	.
chr14	75454539	75461211	UMR_24365|92|92|401|4369|0.09178301670862897	0.015873	.
chr14	79767441	79775187	UMR_24596|404|404|551|23771|0.023179504438180978	0.0102564	.
chr14	80093385	80098564	UMR_24620|12|42|53|504|0.10515873015873016	0.0997571	.
chr14	84440903	84449127	UMR_24647|338|338|500|16264|0.03074274471224791	0.00784422	.
chr14	98164268	98174945	UMR_24800|221|222|191|8438|0.02263569566247926	0.00653595	.
chr14	100281806	100287733	UMR_24858|214|214|334|8916|0.037460744728577834	0.00740741	.
chr14	104456547	104474904	UMR_24971|663|663|394|30757|0.012810092011574601	0.00724638	.
chr14	105893697	105899860	UMR_25027|319|319|259|12714|0.020371244297624665	0	.
chr14	108908439	108915011	UMR_25043|149|149|87|6145|0.014157851912123678	0.00564972	.
chr14	118225535	118239884	UMR_25157|538|538|907|26908|0.033707447599226996	0.00680272	.
chr14	122449427	122466288	UMR_25364|478|491|951|21357|0.04452872594465515	0.00925926	.
chr14	122471127	122483648	UMR_25366|539|539|1245|22770|0.054677206851119896	0.00680272	.
chr15	7809333	7818108	UMR_25469|353|353|551|17208|0.03201999070199907	0.0100302	.
chr15	8441565	8447568	UMR_25479|266|269|146|9660|0.015113871635610766	0	.
chr15	11903035	11908566	UMR_25558|284|284|310|14959|0.02072331038171001	0.00635439	.
chr15	25410320	25416866	UMR_25703|233|233|179|8360|0.021411483253588517	0.00529101	.
chr15	25757751	25763674	UMR_25725|112|112|1002|6132|0.1634050880626223	0.0977522	.
chr15	35291973	35305273	UMR_25968|410|410|525|20438|0.025687444955475095	0.00952381	.
chr15	38469127	38474424	UMR_26092|183|183|1085|8817|0.12305772938641261	0.0119048	.
chr15	44746243	44753854	UMR_26210|124|124|891|5767|0.15449973989942778	0.0206375	.
chr15	48789005	48794270	UMR_26220|133|133|180|6154|0.02924926876828079	0.00653595	.
chr15	53341889	53347622	UMR_26323|223|223|232|12775|0.018160469667318983	0.00555556	.
chr15	57692489	57698594	UMR_26391|245|245|253|9719|0.026031484720650273	0.0047619	.
chr15	59078265	59083289	UMR_26482|200|200|387|10572|0.036606129398410896	0.00574713	.
chr15	61983046	61989364	UMR_26555|292|292|209|12433|0.016810102147510657	0.00687358	.
chr15	64917597	64923623	UMR_26631|218|218|366|11663|0.03138129126296836	0.00775194	.
chr15	72544699	72551012	UMR_26739|267|268|403|13114|0.030730517004727773	0.0132026	.
chr15	73182122	73187227	UMR_26775|248|252|438|11355|0.03857331571994716	0.00584795	.
chr15	74513826	74520288	UMR_26848|352|352|430|15215|0.028261583963194215	0.0070922	.
chr15	75743204	75749296	UMR_26891|335|335|660|16373|0.040310266902827824	0.00980392	.
chr15	75996135	76004957	UMR_26912|339|339|1542|19056|0.08091939546599496	0.0276961	.
chr15	76517208	76524563	UMR_26961|425|427|495|19035|0.026004728132387706	0.00694444	.
chr15	79502685	79508160	UMR_27172|224|224|774|10298|0.07516022528646339	0.00966387	.
chr15	81855823	81861116	UMR_27332|203|203|167|10175|0.016412776412776414	0.00564972	.
chr15	83779299	83785573	UMR_27456|224|227|741|8345|0.08879568603954464	0.0133333	.
chr15	84851463	84857382	UMR_27576|347|347|207|15097|0.013711333377492217	0.00653595	.
chr15	85460607	85465667	UMR_27605|52|52|235|2641|0.08898144642180993	0.0644466	.
chr15	85575129	85584021	UMR_27617|437|437|534|19922|0.026804537697018373	0.00833333	.
chr15	85652401	85657700	UMR_27625|90|90|507|4127|0.1228495275018173	0.0193081	.
chr15	85666071	85682970	UMR_27627|494|494|1258|22873|0.05499934420495781	0.0116959	.
chr15	89172406	89177873	UMR_27826|150|150|1012|7783|0.13002698188359244	0.0182683	.
chr15	92594256	92600028	UMR_27941|71|71|160|2862|0.055904961565338925	0.0070922	.
chr15	96283131	96289976	UMR_28145|484|485|151|18750|0.008053333333333332	0	.
chr15	97999715	98005802	UMR_28243|252|252|850|12004|0.07080973008997	0.0125417	.
chr15	98631219	98637146	UMR_28268|229|229|338|8832|0.03826992753623189	0.00680272	.
chr15	98771446	98781439	UMR_28281|309|309|675|15275|0.044189852700491	0.0132338	.
chr15	98788783	98794998	UMR_28283|251|251|350|13196|0.026523188845104576	0.0112994	.
chr15	98801989	98809891	UMR_28285|288|288|433|14629|0.029598742224348894	0.0105407	.
chr15	98868207	98873261	UMR_28288|190|190|342|7243|0.047218003589672784	0.00680272	.
chr15	98893115	98899208	UMR_28291|232|232|444|13389|0.03316155052655165	0.0138889	.
chr15	98948979	98956316	UMR_28297|125|140|271|5343|0.05072056896874415	0.00793651	.
chr15	98983293	98988311	UMR_28300|103|103|372|4806|0.07740324594257178	0.0247822	.
chr15	99052673	99057836	UMR_28309|187|187|643|9103|0.070636054048116	0.0208333	.
chr15	99092821	99100300	UMR_28314|298|298|719|12478|0.05762141368809104	0.0102588	.
chr15	99221211	99227866	UMR_28321|248|248|897|12128|0.07396108179419525	0.0120906	.
chr15	102242535	102249972	UMR_28537|245|246|716|9251|0.07739703815803697	0.0111111	.
chr15	102690761	102696428	UMR_28567|140|140|370|5993|0.06173869514433506	0.0104396	.
chr15	102742321	102748397	UMR_28575|188|188|427|9946|0.04293183189221798	0.00981241	.
chr15	102908741	103043904	UMR_28584|2748|2750|3273|121306|0.02698135294214631	0.0129048	.
chr15	103054499	103062899	UMR_28586|147|148|340|6857|0.049584366340965434	0.0168813	.
chr15	103165223	103173032	UMR_28600|195|195|996|9249|0.10768731754784301	0.0299663	.
chr16	11982480	11987566	UMR_28902|198|198|258|9700|0.026597938144329897	0.00854701	.
chr16	13445277	13451710	UMR_28934|181|181|862|7033|0.12256505047632589	0.0208333	.
chr16	17796409	17808074	UMR_29016|503|503|863|27237|0.031684840474354735	0.0108408	.
chr16	18580047	18592904	UMR_29070|617|617|1042|33832|0.03079924331993379	0.0106248	.
chr16	23223509	23228868	UMR_29224|146|146|349|7206|0.04843186233694144	0.00833854	.
chr16	23979963	23991680	UMR_29257|393|393|522|16678|0.03129871687252668	0.0104167	.
chr16	27384909	27390292	UMR_29342|101|101|475|4184|0.11352772466539197	0.0132026	.
chr16	30059085	30071240	UMR_29435|506|506|629|22654|0.02776551602366028	0.00701832	.
chr16	34569969	34575327	UMR_29708|231|232|186|9223|0.020166973869673643	0	.
chr16	38087063	38093404	UMR_29854|248|248|123|11419|0.010771521148962257	0.00724638	.
chr16	43502186	43507524	UMR_29985|73|73|208|2898|0.07177363699102829	0.0298423	.
chr16	44550013	44560488	UMR_30031|173|174|776|7888|0.09837728194726167	0.00877193	.
chr16	44660651	44667644	UMR_30041|72|72|327|2950|0.11084745762711865	0.0574082	.
chr16	46494260	46500136	UMR_30083|245|245|195|11337|0.017200317544323895	0.00628931	.
chr16	52448631	52455148	UMR_30212|194|194|171|9511|0.017979181999789717	0.00606061	.
chr16	74407823	74413695	UMR_30577|107|107|156|4490|0.03474387527839644	0.00740741	.
chr16	77235213	77241129	UMR_30653|62|62|122|2767|0.04409107336465486	0.0129935	.
chr16	77398566	77405471	UMR_30657|64|64|340|3130|0.10862619808306709	0.043731	.
chr16	77417486	77423470	UMR_30658|59|59|123|2360|0.05211864406779661	0.0164835	.
chr16	77592841	77598962	UMR_30667|71|71|189|2791|0.06771766391974203	0.030303	.
chr16	77642943	77649998	UMR_30670|78|78|277|3174|0.08727158160050409	0.038165	.
chr16	81200088	81205663	UMR_30725|132|132|428|5745|0.07449956483899042	0.00845101	.
chr16	85168893	85174350	UMR_30774|211|211|550|11039|0.04982335356463448	0.00666667	.
chr16	90384123	90389930	UMR_30927|225|225|262|10680|0.02453183520599251	0.00775194	.
chr16	91219159	91234457	UMR_30999|553|553|1043|27473|0.03796454700979143	0.0130446	.
chr16	91267953	91273040	UMR_31003|225|225|311|13388|0.02322975799223185	0.00564972	.
chr16	92692897	92700798	UMR_31108|310|310|381|15835|0.024060625197347647	0.00793651	.
chr16	94075351	94098476	UMR_31190|690|690|1220|33789|0.036106425167954065	0.0121212	.
chr17	4993355	5001506	UMR_31444|422|422|547|15973|0.03424528892506104	0	.
chr17	6476105	6481148	UMR_31534|78|155|30|943|0.031813361611876985	0	.
chr17	8095509	8105654	UMR_31589|7|152|9|84|0.10714285714285714	0.0811966	.
chr17	8366945	8373174	UMR_31599|92|92|554|4355|0.1272101033295063	0.0268468	.
chr17	8428141	8439026	UMR_31607|276|276|825|14585|0.056564964004113816	0.0135025	.
chr17	8797663	8805338	UMR_31625|283|283|503|12916|0.03894394549396098	0.00694444	.
chr17	10313891	10322625	UMR_31692|383|388|406|14901|0.02724649352392457	0.0070922	.
chr17	13758436	13763728	UMR_31822|294|294|230|14177|0.01622346053466883	0.00574713	.
chr17	15025162	15045684	UMR_31846|22|234|28|273|0.10256410256410256	0	.
chr17	15371669	15382652	UMR_31863|336|336|837|17487|0.0478641276376737	0.00793651	.
chr17	15823787	15833749	UMR_31881|336|336|575|17268|0.033298586981700254	0.00680272	.
chr17	23532389	23539180	UMR_31950|87|141|236|3899|0.060528340600153885	0.0173422	.
chr17	24719093	24724722	UMR_32019|195|199|675|9557|0.0706288584283771	0.00740741	.
chr17	26835154	26858321	UMR_32148|563|570|552|27526|0.02005376734723534	0.0101103	.
chr17	26946013	26954104	UMR_32158|251|251|751|8791|0.08542827892162438	0.0155039	.
chr17	28140413	28146560	UMR_32285|234|236|832|9638|0.08632496368541191	0.00980392	.
chr17	29463531	29468660	UMR_32406|125|128|781|4751|0.16438644495895602	0.0425326	.
chr17	29882727	29890437	UMR_32452|318|318|689|16733|0.04117611904619614	0.00564972	.
chr17	32161983	32167316	UMR_32621|179|179|469|5807|0.08076459445496814	0.0111111	.
chr17	34116747	34123946	UMR_32701|423|423|189|17756|0.010644289254336562	0.00483092	.
chr17	34626587	34633155	UMR_32730|257|257|533|10837|0.04918335332656639	0.015873	.
chr17	35699659	35706484	UMR_32821|188|188|214|8401|0.025473157957386024	0.00775194	.
chr17	36154139	36169364	UMR_32861|256|263|439|8262|0.053134834180585816	0.0119048	.
chr17	36174680	36180742	UMR_32862|57|72|38|1083|0.03508771929824561	0	.
chr17	44733238	44740178	UMR_32996|306|306|266|13670|0.01945866861741039	0.00793651	.
chr17	45592138	45600034	UMR_33044|172|172|1005|7632|0.13168238993710693	0.0141844	.
chr17	46027085	46033494	UMR_33077|285|285|622|12074|0.05151565347026669	0.00653595	.
chr17	46856070	46861170	UMR_33134|229|238|173|8389|0.020622243413994518	0	.
chr17	47138581	47145204	UMR_33144|227|227|479|7977|0.06004763695624921	0.0114943	.
chr17	47921045	47926322	UMR_33209|269|269|351|11016|0.031862745098039214	0.00694444	.
chr17	48094499	48101650	UMR_33232|252|257|633|11727|0.05397799948836019	0.0178938	.
chr17	56137705	56142976	UMR_33440|224|224|998|10049|0.09931336451388198	0.0107527	.
chr17	56469126	56476835	UMR_33474|333|340|830|15856|0.05234611503531786	0.0133547	.
chr17	62878963	62884863	UMR_33597|372|372|169|16427|0.010287940585621233	0.00512821	.
chr17	66446351	66451878	UMR_33742|306|306|482|15537|0.031022719958808006	0.00653595	.
chr17	70846741	70854472	UMR_33912|293|293|165|14030|0.011760513186029936	0.00555556	.
chr17	78198633	78203787	UMR_34097|238|238|128|9355|0.013682522715125602	0.00260417	.
chr17	79710117	79716618	UMR_34150|240|240|487|13448|0.03621356335514574	0.00964602	.
chr17	84182485	84189360	UMR_34344|373|401|516|15769|0.032722430084342696	0.0104167	.
chr17	84362751	84368754	UMR_34346|68|68|793|3172|0.25	0.143688	.
chr17	85484671	85490457	UMR_34406|144|144|283|6358|0.04451085246932998	0.013821	.
chr17	85605261	85610967	UMR_34411|142|142|568|7006|0.08107336568655438	0.0183167	.
chr17	85611840	85626784	UMR_34412|574|575|817|26214|0.031166552224002442	0.00925926	.
chr17	85679457	85693517	UMR_34417|555|555|521|29204|0.01784002191480619	0.0128205	.
chr17	93198015	93206217	UMR_34631|192|192|392|9523|0.04116349889740628	0.0102564	.
chr18	6512631	6517640	UMR_34687|104|104|156|4498|0.03468208092485549	0.00833333	.
chr18	7000731	7006613	UMR_34694|252|252|490|14341|0.034167770727285406	0.00988133	.
chr18	9209971	9218520	UMR_34716|305|306|296|16434|0.018011439698186686	0.00595238	.
chr18	11044627	11061325	UMR_34744|497|497|479|23795|0.02013027947047699	0.00900901	.
chr18	13967603	13974170	UMR_34859|286|286|321|10142|0.031650562019325576	0.00833333	.
chr18	15061207	15067978	UMR_34891|330|330|583|15789|0.03692444106656533	0.00666667	.
chr18	16804180	16811472	UMR_34942|282|282|133|10777|0.012341096780180014	0	.
chr18	21650584	21655900	UMR_34993|177|177|205|7693|0.026647601715845574	0.00740741	.
chr18	23036293	23042412	UMR_35021|195|195|109|8795|0.012393405343945424	0.00483092	.
chr18	33459845	33465518	UMR_35254|151|151|134|5071|0.026424768290278053	0.00775194	.
chr18	35209867	35216044	UMR_35344|73|73|557|3847|0.1447881466077463	0.118905	.
chr18	35828347	35835384	UMR_35376|280|280|437|9506|0.045970965705869976	0.00803329	.
chr18	35916661	35921736	UMR_35386|184|184|572|7880|0.07258883248730964	0.0109319	.
chr18	36279917	36288412	UMR_35417|375|375|557|14050|0.039644128113879004	0.00757576	.
chr18	38144286	38149292	UMR_35553|92|92|482|4063|0.11863155303962589	0.0424275	.
chr18	38208285	38215408	UMR_35563|265|265|642|12446|0.05158283785955327	0.00641026	.
chr18	42392969	42404018	UMR_35678|333|333|405|15756|0.025704493526275705	0.0116959	.
chr18	43389465	43395242	UMR_35736|123|123|184|5778|0.031844929041190725	0.0107527	.
chr18	47364285	47372104	UMR_35855|265|265|476|12724|0.03740961961647281	0.00574713	.
chr18	53460141	53474591	UMR_35972|474|481|484|22405|0.021602320910511046	0.0104179	.
chr18	54120887	54127444	UMR_35998|102|103|572|4751|0.12039570616712271	0.0642794	.
chr18	54981937	54993768	UMR_36052|209|210|301|8680|0.03467741935483871	0.0070922	.
chr18	55375071	55380494	UMR_36081|59|59|331|2862|0.11565338923829489	0.0559427	.
chr18	55545771	55550780	UMR_36094|71|71|131|3003|0.043623043623043624	0	.
chr18	55692553	55698783	UMR_36099|77|77|376|3522|0.10675752413401476	0.017443	.
chr18	60921597	60926912	UMR_36286|81|82|533|4476|0.11907953529937444	0.0407407	.
chr18	61397496	61403240	UMR_36315|263|263|537|11887|0.045175401699335406	0.00666667	.
chr18	64329621	64349554	UMR_36417|601|602|594|26145|0.022719449225473323	0.00925926	.
chr18	64886292	64891538	UMR_36444|214|214|606|9260|0.06544276457883369	0.00641026	.
chr18	65577045	65585048	UMR_36488|222|222|381|9362|0.04069643238624226	0.00694444	.
chr18	65934225	65942026	UMR_36514|246|246|420|14276|0.02942000560381059	0.00909287	.
chr18	69343869	69353634	UMR_36689|236|236|208|8290|0.02509047044632087	0.00813008	.
chr18	69498428	69508274	UMR_36714|164|164|643|6233|0.10316059682335954	0.023634	.
chr18	69514906	69528582	UMR_36716|226|226|1216|10378|0.11717093852380035	0.0657159	.
chr18	69558373	69564788	UMR_36720|88|88|684|4093|0.16711458587832886	0.139923	.
chr18	69574525	69581042	UMR_36722|93|93|385|4010|0.09600997506234414	0.0196078	.
chr18	69589365	69610525	UMR_36723|319|319|1075|13021|0.08255894324552646	0.0263158	.
chr18	72346491	72351646	UMR_36804|125|125|206|5144|0.04004665629860031	0.00617284	.
chr18	73571377	73576644	UMR_36827|289|289|154|13699|0.011241696474195196	0.00653595	.
chr18	75365957	75376041	UMR_36914|426|426|784|17555|0.044659641127883794	0.0070922	.
chr18	76240671	76246016	UMR_36994|246|246|292|10953|0.026659362731671687	0.00660131	.
chr18	76842601	76863711	UMR_37019|583|583|793|28539|0.027786537720312556	0.0115251	.
chr18	77560055	77566217	UMR_37054|236|236|215|8243|0.026082736867645274	0.00900901	.
chr18	79105344	79110986	UMR_37131|239|239|163|9343|0.017446216418709193	0.00628931	.
chr18	80706553	80716028	UMR_37188|423|423|1041|20507|0.050763154044960256	0.00854701	.
chr18	80979409	80993245	UMR_37198|523|523|814|23917|0.034034368858970605	0.00952381	.
chr18	82908401	82919016	UMR_37308|442|446|478|17427|0.027428702587938256	0.00512821	.
chr18	84082049	84092768	UMR_37373|499|499|937|21738|0.04310424142055387	0.00854701	.
chr18	84718690	84724694	UMR_37403|145|145|231|7012|0.03294352538505419	0.0070922	.
chr18	86710419	86715892	UMR_37431|159|159|252|7255|0.034734665747760164	0.00877193	.
chr19	4211919	4217674	UMR_37500|199|199|677|8146|0.08310827399950896	0.010101	.
chr19	5093951	5099118	UMR_37562|142|142|435|5908|0.07362897765741368	0.0133333	.
chr19	5793935	5804876	UMR_37606|204|204|640|10038|0.06375772066148636	0.00952381	.
chr19	7264117	7270197	UMR_37740|223|223|273|10823|0.025224059872493765	0.00793651	.
chr19	7416426	7424986	UMR_37750|427|427|982|20616|0.04763290648040357	0.00877193	.
chr19	12004605	12013854	UMR_37894|275|275|555|12627|0.04395343311950582	0.00833333	.
chr19	14594485	14599970	UMR_37930|286|286|307|13769|0.02229646306921345	0.00512821	.
chr19	16867979	16880694	UMR_38007|421|421|1083|21825|0.04962199312714777	0.0136054	.
chr19	21777269	21787179	UMR_38098|200|200|921|10260|0.08976608187134504	0.0113255	.
chr19	24896668	24903460	UMR_38229|255|255|328|13041|0.025151445441300515	0.00854701	.
chr19	25604780	25616223	UMR_38274|398|398|1163|18756|0.06200682448283216	0.0186579	.
chr19	25665375	25676876	UMR_38279|305|305|487|15633|0.031152050150323036	0.0141844	.
chr19	26603419	26610286	UMR_38304|311|311|268|14345|0.018682467758800975	0.00628931	.
chr19	29250068	29255900	UMR_38424|211|211|339|8668|0.03910936778957084	0.00775194	.
chr19	32754453	32761038	UMR_38543|290|290|264|12325|0.021419878296146045	0.00680272	.
chr19	37432675	37438419	UMR_38631|277|277|484|13331|0.03630635361188208	0.014668	.
chr19	37689511	37700063	UMR_38649|398|398|1342|21460|0.0625349487418453	0.0134213	.
chr19	38477785	38483003	UMR_38688|165|165|489|8212|0.059547004383828546	0.0130769	.
chr19	43383849	43389340	UMR_38895|152|152|152|6090|0.02495894909688013	0.00833333	.
chr19	43595291	43620774	UMR_38914|736|736|1605|36572|0.04388603303073389	0.0158119	.
chr19	44291825	44299014	UMR_38954|132|132|650|6512|0.09981572481572482	0.0152357	.
chr19	44492826	44501072	UMR_38970|118|118|881|5303|0.16613237789930227	0.135303	.
chr19	44509433	44519516	UMR_38971|228|228|1405|12622|0.11131357946442719	0.0536057	.
chr19	44739933	44761582	UMR_38994|697|698|604|30985|0.01949330321123124	0.00775194	.
chr19	45014253	45019375	UMR_39015|195|195|170|7232|0.02350663716814159	0.00606061	.
chr19	45074103	45082518	UMR_39024|336|336|494|17499|0.02823018458197611	0.0100256	.
chr19	45139219	45163986	UMR_39031|582|583|1292|29441|0.043884378927346215	0.012013	.
chr19	45220216	45244908	UMR_39035|824|825|650|38414|0.016920914250013016	0.00877193	.
chr19	46036926	46047172	UMR_39101|288|289|502|10597|0.04737189770689818	0.00854701	.
chr19	46314073	46319512	UMR_39113|217|217|1157|9995|0.11575787893946973	0.022409	.
chr19	46499383	46504930	UMR_39134|309|309|127|13039|0.00974001073701971	0	.
chr19	46527523	46532842	UMR_39139|98|98|640|4271|0.14984781081713885	0.0639742	.
chr19	47012843	47019674	UMR_39171|258|258|659|13129|0.050194226521441086	0.00653595	.
chr19	55739751	55751278	UMR_39479|353|353|845|13466|0.06275063121936729	0.0111111	.
chr19	59162614	59174516	UMR_39731|388|388|693|20136|0.034415971394517283	0.0110382	.
chr19	59188549	59196760	UMR_39732|151|151|400|6498|0.061557402277623886	0.0205128	.
chr19	59450494	59472096	UMR_39743|647|647|1370|32385|0.04230353558746333	0.0104993	.
chr19	60144022	60149920	UMR_39776|83|83|284|3775|0.0752317880794702	0.0343646	.
chr19	60463559	60469461	UMR_39795|131|131|583|7493|0.07780595222207394	0.0274194	.
chr2	4558747	4564134	UMR_39889|76|76|330|3805|0.08672798948751642	0.0158627	.
chr2	6865499	6877374	UMR_39981|267|267|407|11028|0.03690605730866884	0.00813008	.
chr2	6879456	6886110	UMR_39982|58|58|193|2328|0.08290378006872852	0.0268953	.
chr2	9871129	9899828	UMR_40038|741|742|798|32997|0.024184016728793528	0.012013	.
chr2	10367551	10376766	UMR_40059|279|279|298|12644|0.023568490983865865	0.00641026	.
chr2	13571921	13577076	UMR_40136|142|142|98|7208|0.013596004439511655	0.00595238	.
chr2	18025061	18035015	UMR_40189|324|324|875|15678|0.055810690139048345	0.0116959	.
chr2	18038884	18059542	UMR_40190|540|540|535|23384|0.022878891549777625	0.00766385	.
chr2	18675970	18681676	UMR_40203|320|320|476|11144|0.04271356783919598	0.00660649	.
chr2	18686719	18701032	UMR_40204|412|412|506|18731|0.02701404089477337	0.00929186	.
chr2	19428921	19434358	UMR_40238|173|173|398|8598|0.04628983484531286	0.0163934	.
chr2	19441665	19459068	UMR_40239|377|377|742|20543|0.03611935939249379	0.00854701	.
chr2	22617606	22628418	UMR_40300|265|265|641|13518|0.047418257138629974	0.010101	.
chr2	24470803	24475824	UMR_40320|131|131|346|6890|0.050217706821480405	0.0205566	.
chr2	25576734	25582830	UMR_40378|329|329|1527|20298|0.07522908660951817	0.0363463	.
chr2	26194345	26208820	UMR_40403|388|388|1148|22447|0.05114269167372032	0.0208037	.
chr2	26499945	26505017	UMR_40422|201|201|276|11208|0.02462526766595289	0.00595238	.
chr2	28907051	28919966	UMR_40571|439|439|470|22749|0.020660248802145148	0.0116959	.
chr2	29249693	29256000	UMR_40608|259|259|301|12660|0.02377567140600316	0.00724638	.
chr2	30061351	30068459	UMR_40670|324|324|292|12146|0.02404083648937922	0.00623543	.
chr2	30469395	30475026	UMR_40691|370|370|152|17910|0.008486878838637633	0.00537634	.
chr2	30716185	30726295	UMR_40722|200|200|622|10466|0.05943053697687751	0.0186933	.
chr2	31633915	31642774	UMR_40799|405|405|819|20638|0.0396840779145266	0.0118449	.
chr2	31759464	31764578	UMR_40805|77|77|154|3898|0.03950743971267317	0.00952381	.
chr2	32150258	32155514	UMR_40838|197|197|378|7334|0.05154076902099809	0.00724638	.
chr2	33579261	33585628	UMR_40946|130|130|492|6108|0.08055009823182711	0.0227875	.
chr2	33626073	33647352	UMR_40952|721|721|1491|35590|0.04189379039055915	0.0119048	.
chr2	36089979	36109292	UMR_41134|480|480|1398|23553|0.05935549611514457	0.0138889	.
chr2	38093679	38100932	UMR_41176|31|31|189|1435|0.13170731707317074	0.0867014	.
chr2	38135309	38146362	UMR_41178|62|62|328|2398|0.13678065054211844	0.129834	.
chr2	38333205	38360989	UMR_41187|707|707|997|32150|0.031010886469673406	0.00724638	.
chr2	45095626	45118922	UMR_41328|477|485|1155|16855|0.0685256600415307	0.0104167	.
chr2	49447767	49453392	UMR_41396|236|236|227|9432|0.024067005937234945	0	.
chr2	51144029	51149835	UMR_41493|160|160|150|8084|0.01855517070757051	0.00666667	.
chr2	57374005	57379223	UMR_41627|55|55|288|2383|0.12085606378514478	0.0926778	.
chr2	60117847	60127606	UMR_41753|216|216|739|7811|0.09461016515170913	0.0102588	.
chr2	61654506	61659564	UMR_41817|173|173|442|6772|0.0652687536916716	0.00757576	.
chr2	61801543	61816320	UMR_41826|498|498|1354|23452|0.05773494797885042	0.0128205	.
chr2	65930016	65935043	UMR_41939|51|51|260|2072|0.12548262548262548	0.0460838	.
chr2	68403915	68411788	UMR_41999|125|125|1265|6446|0.1962457337883959	0.100873	.
chr2	70470354	70478361	UMR_42082|360|360|852|16091|0.0529488533963085	0.0107128	.
chr2	70557920	70570377	UMR_42086|453|453|759|20777|0.03653077922702989	0.0104167	.
chr2	71524767	71552813	UMR_42132|900|900|1384|41267|0.03353769355659486	0.0117266	.
chr2	72474506	72479723	UMR_42202|167|167|251|7841|0.03201122305828338	0.00666667	.
chr2	73262347	73282475	UMR_42243|729|730|803|33221|0.024171457812829235	0.0111111	.
chr2	74647097	74716472	UMR_42314|2267|2268|2730|100296|0.027219430485762145	0.0119086	.
chr2	74719140	74754348	UMR_42315|833|833|1078|41160|0.02619047619047619	0.0111111	.
chr2	78867993	78874325	UMR_42470|250|250|273|7258|0.03761366767704602	0.00804264	.
chr2	79453697	79462692	UMR_42500|239|239|427|10883|0.03923550491592392	0.0112053	.
chr2	84733408	84739994	UMR_42586|102|102|578|5467|0.10572526065483812	0.0359499	.
chr2	84882563	84890610	UMR_42599|285|285|626|11257|0.055609842764502086	0.00925926	.
chr2	92181767	92187078	UMR_42703|213|216|152|6137|0.02476780185758514	0	.
chr2	93638282	93649858	UMR_42831|347|347|953|19943|0.047786190643333504	0.0179182	.
chr2	94239061	94247970	UMR_42859|278|278|375|10868|0.03450496871549503	0.00980392	.
chr2	94262676	94267845	UMR_42860|82|82|47|3245|0.01448382126348228	0.00606061	.
chr2	96314845	96319897	UMR_42883|57|57|187|2273|0.08227012758468984	0.0277778	.
chr2	97465775	97471144	UMR_42890|88|88|86|3495|0.024606580829756794	0.00803329	.
chr2	104813517	104818566	UMR_43057|175|175|142|7133|0.01990747231179027	0.00628931	.
chr2	105120440	105135382	UMR_43066|485|485|544|23647|0.023005032350826744	0.0117013	.
chr2	105659365	105664914	UMR_43102|150|150|793|6683|0.11865928475235672	0.0601211	.
chr2	105666836	105684470	UMR_43103|593|593|1105|28641|0.03858105513075661	0.00793651	.
chr2	105685635	105691778	UMR_43104|167|167|361|7615|0.047406434668417596	0.0130719	.
chr2	106690493	106701390	UMR_43146|306|306|529|12335|0.042886096473449535	0.00653595	.
chr2	109673251	109680156	UMR_43193|221|221|219|9201|0.023801760678187154	0.00617284	.
chr2	109691601	109698050	UMR_43194|175|175|233|8627|0.02700822997565782	0.00666667	.
chr2	115721827	115727170	UMR_43334|58|58|202|3125|0.06464	0.0208695	.
chr2	115852043	115863173	UMR_43339|263|263|329|11249|0.02924704418170504	0.0114943	.
chr2	116051844	116076478	UMR_43361|603|609|1005|24177|0.0415684328080407	0.00877193	.
chr2	116321735	116326784	UMR_43367|46|46|359|1969|0.18232605383443373	0.1278	.
chr2	118543905	118550517	UMR_43451|160|160|618|8734|0.07075795740783146	0.00724638	.
chr2	118699926	118707378	UMR_43461|294|294|774|16201|0.0477748287142769	0.00980392	.
chr2	118895645	118904271	UMR_43481|395|395|372|15199|0.02447529442726495	0.00925926	.
chr2	119321542	119328759	UMR_43508|315|315|329|15111|0.02177221891337436	0.00666667	.
chr2	119740565	119745764	UMR_43522|247|247|669|12485|0.05358430116139367	0.0125146	.
chr2	122294513	122303230	UMR_43609|258|270|547|13592|0.04024426133019423	0.016001	.
chr2	128122283	128128999	UMR_43769|387|387|493|21187|0.023268985698777552	0.00934761	.
chr2	130576157	130581758	UMR_43892|189|189|612|8859|0.06908228919742634	0.0273342	.
chr2	137112606	137117988	UMR_44105|286|286|273|13455|0.020289855072463767	0.00611672	.
chr2	140666513	140672031	UMR_44166|86|86|193|4410|0.043764172335600905	0.0135543	.
chr2	144265568	144271548	UMR_44259|160|160|313|8402|0.03725303499166865	0.00680272	.
chr2	146214536	146227622	UMR_44324|555|555|817|25219|0.03239620920734367	0.00694444	.
chr2	146255978	146262888	UMR_44325|65|65|489|3056|0.16001308900523561	0.0496454	.
chr2	146832813	146840524	UMR_44356|244|244|288|11812|0.024381984422621062	0.0124967	.
chr2	147177521	147196712	UMR_44372|656|657|705|30833|0.022865112055265462	0.0107527	.
chr2	147358135	147375932	UMR_44379|397|403|546|20424|0.02673325499412456	0.0119658	.
chr2	148028677	148054431	UMR_44396|606|606|935|29157|0.03206777103268512	0.0107527	.
chr2	152046701	152052689	UMR_44478|172|172|142|7299|0.019454719824633513	0.00900901	.
chr2	152079039	152084803	UMR_44482|142|142|348|6325|0.0550197628458498	0.00694444	.
chr2	152410611	152415656	UMR_44505|239|239|149|10917|0.013648438215627003	0.00617284	.
chr2	158606161	158617344	UMR_44897|415|415|487|21344|0.022816716641679162	0.0138889	.
chr2	160358631	160372478	UMR_44950|481|481|924|24432|0.03781925343811395	0.0119048	.
chr2	162657295	162663442	UMR_45046|231|231|359|10124|0.03546029237455551	0.00900901	.
chr2	164966303	164971604	UMR_45213|216|216|371|9064|0.04093115622241836	0.00913413	.
chr2	165877471	165889358	UMR_45328|214|214|983|8969|0.10959973241164009	0.0612573	.
chr2	166151147	166156478	UMR_45348|238|238|524|12253|0.04276503713376316	0.0070922	.
chr2	167061593	167067505	UMR_45435|170|170|355|8141|0.04360643655570569	0.0092293	.
chr2	168761791	168768000	UMR_45599|224|224|271|9621|0.028167550150711984	0.0102588	.
chr2	170128486	170134892	UMR_45704|253|253|217|9307|0.023315783818631138	0.00775194	.
chr2	170218231	170223316	UMR_45715|122|122|133|5289|0.025146530535072792	0.00854701	.
chr2	172544369	172554886	UMR_45891|445|445|1667|22579|0.07382966473271624	0.0128205	.
chr2	172933181	172941868	UMR_45923|318|318|1452|16720|0.0868421052631579	0.0111459	.
chr2	179534677	179540246	UMR_46149|59|60|476|2957|0.16097396009469056	0.0502952	.
chr2	180888432	180895507	UMR_46264|342|342|503|17604|0.028573051579186548	0.00628931	.
chr2	181762735	181769574	UMR_46310|57|57|235|2626|0.0894897182025895	0.0192857	.
chr3	5210247	5227962	UMR_46324|273|273|1380|10342|0.1334364726358538	0.0222222	.
chr3	8662623	8668578	UMR_46351|262|262|519|12315|0.04214372716199757	0	.
chr3	17788671	17795841	UMR_46496|155|155|825|7083|0.11647606946209234	0.0397463	.
chr3	18049331	18059960	UMR_46500|305|305|584|14431|0.040468436005820806	0.0114169	.
chr3	29522215	29527344	UMR_46683|26|50|134|1124|0.11921708185053381	0.0669193	.
chr3	30505523	30516302	UMR_46721|431|435|720|19063|0.03776950112783927	0.00833333	.
chr3	34637144	34669102	UMR_46837|898|898|1503|39778|0.03778470511337925	0.00854701	.
chr3	45374987	45382749	UMR_47102|366|366|210|17772|0.011816340310600946	0.00537634	.
chr3	52100751	52106511	UMR_47254|289|290|238|12806|0.01858503826331407	0.00606061	.
chr3	55777619	55790473	UMR_47424|285|285|929|13613|0.06824359068537428	0.0294785	.
chr3	58413931	58419835	UMR_47477|312|312|195|17216|0.011326672862453532	0.00555556	.
chr3	60499969	60505038	UMR_47510|164|164|351|6988|0.05022896393817974	0.00757576	.
chr3	63895557	63901576	UMR_47548|105|105|260|4959|0.0524299253881831	0.00952381	.
chr3	66969693	66986622	UMR_47627|500|501|492|23205|0.021202327084680027	0.00775194	.
chr3	68571829	68577606	UMR_47679|96|96|577|4826|0.11956071280563614	0.0286195	.
chr3	73052883	73058696	UMR_47760|135|135|242|4854|0.049855789039967034	0	.
chr3	80797589	80804304	UMR_47853|145|145|279|6323|0.044124624387157994	0.00833333	.
chr3	83976275	83981639	UMR_47930|37|37|277|1682|0.16468489892984542	0.135957	.
chr3	84300910	84306400	UMR_47959|119|119|410|6590|0.0622154779969651	0.00990317	.
chr3	86544677	86551758	UMR_48052|178|178|256|8859|0.028897166723106445	0.0128092	.
chr3	87905765	87911240	UMR_48125|182|183|352|8032|0.043824701195219126	0.00701832	.
chr3	87944651	87950570	UMR_48128|139|139|688|6429|0.10701508788303002	0.0544521	.
chr3	87969379	87975232	UMR_48131|179|179|187|9737|0.01920509397144911	0.00512821	.
chr3	87995569	88003010	UMR_48136|264|265|807|13126|0.06148103001676063	0.0211694	.
chr3	88137757	88144586	UMR_48147|243|243|630|11379|0.055365146322172425	0.00877193	.
chr3	88196958	88244731	UMR_48154|758|758|1822|40233|0.04528620783933587	0.00903986	.
chr3	88529157	88540470	UMR_48186|285|297|553|11644|0.04749227069735486	0.00966387	.
chr3	88620298	88625729	UMR_48194|174|174|190|8039|0.02363478044532902	0.00611672	.
chr3	89390136	89397044	UMR_48249|256|256|143|9282|0.015406162464985995	0.00694746	.
chr3	89417093	89422702	UMR_48251|144|144|371|6457|0.05745702338547313	0.0125283	.
chr3	93442961	93448376	UMR_48330|348|355|120|14966|0.008018174528932246	0	.
chr3	95902206	95908012	UMR_48409|111|111|262|4746|0.05520438263801096	0.0144996	.
chr3	95992859	95998222	UMR_48417|178|178|277|7292|0.037986834887548	0.00694444	.
chr3	96348125	96357701	UMR_48446|29|174|76|698|0.10888252148997135	0.0474537	.
chr3	96456516	96464587	UMR_48461|119|322|374|7692|0.048621944877795115	0.0117873	.
chr3	96496588	96503928	UMR_48466|199|199|378|9205|0.04106463878326996	0.00628931	.
chr3	99233180	99265260	UMR_48582|635|635|1205|31351|0.038435775573346945	0.0143386	.
chr3	100681136	100686684	UMR_48598|224|224|272|9983|0.027246318741861165	0.00653595	.
chr3	102008511	102014158	UMR_48698|169|169|292|9070|0.032194046306504964	0.0128205	.
chr3	107579541	107585338	UMR_48918|133|133|422|6212|0.06793303283966516	0.0167084	.
chr3	107594087	107600594	UMR_48919|246|246|743|13676|0.054328751096811935	0.011496	.
chr3	114029409	114034815	UMR_49046|80|80|157|2797|0.05613156953879156	0.00595238	.
chr3	118428270	118436478	UMR_49142|170|170|265|7066|0.03750353806962921	0.00757576	.
chr3	122042694	122049345	UMR_49274|120|120|835|6192|0.1348514211886305	0.0304012	.
chr3	127624836	127635855	UMR_49420|417|417|779|20190|0.03858345715700842	0.00833333	.
chr3	129194115	129228212	UMR_49475|987|988|712|46330|0.015368012087200518	0.00854701	.
chr3	129531633	129537004	UMR_49485|203|203|290|9699|0.029899989689658728	0.00680272	.
chr3	131105181	131114293	UMR_49562|404|405|450|19074|0.023592324630386914	0.00775194	.
chr3	134234955	134241046	UMR_49648|214|215|117|5975|0.019581589958158997	0	.
chr3	134302094	134307274	UMR_49653|46|46|331|1993|0.16608128449573506	0.0333635	.
chr3	137863469	137868952	UMR_49740|340|341|319|12713|0.02509242507669315	0.00844017	.
chr3	144196299	144206372	UMR_49922|369|369|486|13724|0.035412416205187994	0.00724638	.
chr3	145648027	145653902	UMR_49983|231|231|427|12871|0.03317535545023697	0.00865801	.
chr3	147962851	147968078	UMR_50088|71|71|530|3218|0.16469857054070852	0.133264	.
chr3	148984221	148992342	UMR_50136|380|380|203|17454|0.01163057178870173	0.00660131	.
chr3	154325611	154335416	UMR_50343|336|336|330|16733|0.019721508396581607	0.00980392	.
chr4	6986678	6991914	UMR_50455|160|160|184|6480|0.028395061728395062	0.00641975	.
chr4	8689253	8694508	UMR_50482|394|394|179|14242|0.012568459486027243	0.00628931	.
chr4	9841129	9851506	UMR_50535|258|259|704|12380|0.05686591276252019	0.0124711	.
chr4	11384337	11389924	UMR_50567|247|247|335|11000|0.030454545454545453	0.0108408	.
chr4	13740827	13746168	UMR_50647|176|176|197|8064|0.024429563492063492	0.00757576	.
chr4	13747491	13754020	UMR_50648|90|90|431|3144|0.13708651399491095	0.0166667	.
chr4	13777735	13786612	UMR_50650|86|86|733|4028|0.18197616683217477	0.108395	.
chr4	21673722	21691716	UMR_50738|573|573|727|28875|0.025177489177489177	0.010101	.
chr4	22476345	22499278	UMR_50763|654|654|1006|26967|0.03730485408091371	0.00680272	.
chr4	23825471	23833882	UMR_50782|36|36|175|1373|0.12745812090313183	0.116939	.
chr4	24212875	24220538	UMR_50789|56|56|291|2393|0.12160468031759299	0.0502172	.
chr4	32237655	32244692	UMR_50915|299|299|481|14397|0.033409738139890253	0.00617284	.
chr4	41680921	41686837	UMR_51181|165|165|450|10530|0.042735042735042736	0.0119048	.
chr4	44700648	44708110	UMR_51307|258|258|602|14690|0.04098025867937372	0.00673469	.
chr4	44710175	44717468	UMR_51308|236|236|230|12088|0.01902713434811383	0.0125786	.
chr4	45528019	45533142	UMR_51360|280|280|305|14908|0.020458814059565334	0.00564972	.
chr4	46337478	46349470	UMR_51421|490|490|955|23509|0.04062274022714705	0.0132138	.
chr4	48042120	48049965	UMR_51534|411|411|359|19151|0.01874575740170226	0.00595238	.
chr4	54944261	54951970	UMR_51682|208|209|86|7615|0.011293499671700591	0.00653595	.
chr4	66400709	66405799	UMR_52012|185|185|314|9685|0.03242127000516262	0.00564972	.
chr4	72194990	72205576	UMR_52065|329|329|371|17873|0.020757567280255133	0.00584795	.
chr4	72380915	72386090	UMR_52067|58|58|263|2907|0.09047127622979016	0.0479599	.
chr4	81563413	81569232	UMR_52149|87|87|245|3695|0.06630581867388363	0.0329783	.
chr4	82488770	82518442	UMR_52192|639|639|1144|25702|0.04451015485176251	0.00877193	.
chr4	82531397	82545678	UMR_52194|201|201|889|9943|0.08940963491903851	0.0276361	.
chr4	87650205	87655488	UMR_52410|41|41|297|1922|0.15452653485952134	0.116555	.
chr4	88028639	88036137	UMR_52437|311|311|190|11563|0.01643172187148664	0	.
chr4	89270505	89311866	UMR_52475|748|752|1418|33132|0.042798502957865504	0.0144928	.
chr4	89687685	89693574	UMR_52493|128|128|398|6619|0.06012992899229491	0.00732689	.
chr4	91370073	91377358	UMR_52515|303|303|622|13256|0.04692214846107423	0.0070922	.
chr4	95047936	95054882	UMR_52546|302|302|353|16466|0.021438114903437385	0.00628931	.
chr4	97578695	97587213	UMR_52595|118|118|592|5277|0.11218495357210537	0.0250532	.
chr4	97606395	97612288	UMR_52597|62|62|342|2989|0.11441953830712613	0.0343817	.
chr4	97750160	97759774	UMR_52609|176|176|1115|9159|0.12173818102412927	0.0111111	.
chr4	97770645	97782667	UMR_52610|377|377|295|13824|0.021339699074074073	0.00606061	.
chr4	97923012	97928704	UMR_52628|49|49|337|2274|0.14819700967458224	0.0833	.
chr4	98098804	98103984	UMR_52639|64|64|309|2634|0.11731207289293849	0.0761912	.
chr4	99649909	99664036	UMR_52703|684|687|663|30464|0.021763392857142856	0.0116959	.
chr4	100775775	100781742	UMR_52740|219|219|333|11109|0.029975695382122605	0.0070922	.
chr4	102974367	102979423	UMR_52819|84|84|672|3833|0.17531959300808767	0.103586	.
chr4	106837053	106842982	UMR_52997|193|193|550|7304|0.07530120481927711	0.00724638	.
chr4	106908888	106914218	UMR_53002|289|289|224|13416|0.016696481812760882	0.00724638	.
chr4	109858179	109863715	UMR_53150|36|36|230|1413|0.16277423920736023	0.12364	.
chr4	109973851	109988917	UMR_53154|690|691|847|34807|0.024334185652311317	0.00694444	.
chr4	114899147	114917502	UMR_53213|556|556|981|27790|0.035300467794170565	0.0113027	.
chr4	115052003	115065008	UMR_53220|383|383|434|17801|0.02438065277231616	0.0104167	.
chr4	115931667	115946458	UMR_53246|378|378|1225|17347|0.07061739782094886	0.0120301	.
chr4	115961755	115968611	UMR_53248|144|144|449|6837|0.06567207839695773	0.0115079	.
chr4	116219001	116224094	UMR_53262|136|136|127|5044|0.025178429817605076	0.00716929	.
chr4	117492786	117497900	UMR_53336|269|269|202|11413|0.017699115044247787	0.00793651	.
chr4	119107877	119113076	UMR_53429|151|151|675|7269|0.09286009079653322	0.0104192	.
chr4	119812369	119817582	UMR_53465|86|86|383|4167|0.09191264698824093	0.0193842	.
chr4	120259170	120264968	UMR_53497|65|65|429|3269|0.13123279290302844	0.0126478	.
chr4	120266968	120273835	UMR_53498|248|248|1396|12444|0.11218257794921248	0.035718	.
chr4	120280429	120288776	UMR_53501|286|286|880|13261|0.06636000301636377	0.00784422	.
chr4	120745588	120750914	UMR_53524|221|221|541|8434|0.06414512686744131	0.00925926	.
chr4	122994987	123000274	UMR_53559|202|202|293|9165|0.03196944899072559	0.00724638	.
chr4	123661395	123668106	UMR_53585|253|253|474|11102|0.042695009908124665	0	.
chr4	124354685	124361312	UMR_53637|36|95|181|1136|0.15933098591549297	0.0954823	.
chr4	124655853	124661052	UMR_53678|388|388|367|20294|0.018084162806740908	0.00617284	.
chr4	124983637	124991160	UMR_53708|237|237|987|10762|0.09171157777364802	0.0238095	.
chr4	125483311	125495810	UMR_53770|383|383|700|18919|0.036999841429251015	0.00980392	.
chr4	126254445	126261305	UMR_53851|200|200|409|9566|0.042755592724231656	0.00784422	.
chr4	126464093	126469668	UMR_53862|136|136|284|5682|0.049982400563181976	0.00980392	.
chr4	126731016	126736726	UMR_53878|246|247|368|12807|0.028734285937377996	0.0173926	.
chr4	127167563	127173840	UMR_53897|207|207|460|8303|0.055401662049861494	0.0114943	.
chr4	128732809	128738719	UMR_53996|77|77|781|4280|0.1824766355140187	0.142951	.
chr4	129981502	129988657	UMR_54108|323|323|541|12480|0.04334935897435897	0.00995025	.
chr4	133008978	133018098	UMR_54329|262|262|549|10237|0.05362899286900459	0.00724638	.
chr4	133090077	133101554	UMR_54340|114|318|769|5016|0.15330940988835726	0.0151515	.
chr4	133493851	133500110	UMR_54380|211|211|1021|9758|0.10463209674113548	0.0145547	.
chr4	133750009	133758036	UMR_54402|437|437|200|17020|0.011750881316098707	0	.
chr4	133966533	133972160	UMR_54413|228|228|402|10442|0.038498371959394755	0.00694444	.
chr4	134015509	134021018	UMR_54419|153|153|253|7022|0.036029621190544	0.0167677	.
chr4	134249167	134258658	UMR_54435|279|280|1197|15588|0.07678983833718245	0.0212766	.
chr4	134465881	134472304	UMR_54459|193|193|851|8486|0.1002828187603111	0.0104167	.
chr4	135146614	135159324	UMR_54523|443|443|590|22763|0.025919254931248078	0.0130719	.
chr4	136244875	136250195	UMR_54629|165|165|725|7868|0.09214539908490087	0.0123457	.
chr4	136833667	136839054	UMR_54682|261|261|501|12412|0.040364163712536254	0.00775194	.
chr4	137381015	137389258	UMR_54736|92|175|420|4862|0.08638420403126286	0.0208828	.
chr4	138688468	138693890	UMR_54851|70|70|392|3284|0.11936662606577345	0.0778562	.
chr4	139806897	139811916	UMR_54948|80|83|386|3357|0.1149836163240989	0.0243902	.
chr4	139817521	139839024	UMR_54951|643|649|1773|27664|0.06409051474840949	0.0155039	.
chr4	140243148	140249833	UMR_55009|260|260|490|12172|0.04025632599408478	0.00877193	.
chr4	140699315	140704655	UMR_55067|300|317|287|10567|0.027160026497586826	0.00497512	.
chr4	141534225	141539446	UMR_55153|314|314|310|14953|0.020731625760716913	0.00600649	.
chr4	142473621	142480928	UMR_55227|41|43|431|2116|0.20368620037807184	0.137505	.
chr4	148803127	148810446	UMR_55432|279|285|481|11253|0.04274415711365858	0.0070922	.
chr4	150028789	150033856	UMR_55554|129|129|523|6769|0.07726399763628305	0.0151515	.
chr4	152285522	152293189	UMR_55782|229|229|758|11581|0.06545203350315171	0.0141844	.
chr4	153478223	153484958	UMR_55892|313|313|537|16884|0.031805259417199715	0.00740741	.
chr4	154598072	154604642	UMR_56001|106|106|1037|6002|0.1727757414195268	0.125812	.
chr4	154632169	154640301	UMR_56006|419|424|799|19773|0.040408638041774136	0.00854701	.
chr4	154959993	154965763	UMR_56035|288|288|311|16503|0.01884505847421681	0.00584795	.
chr4	156252093	156281322	UMR_56122|80|80|463|4286|0.10802613159122725	0.0331436	.
chr5	3339441	3345662	UMR_56126|292|295|56|7951|0.007043139227770092	0	.
chr5	13397156	13403013	UMR_56260|80|80|194|2937|0.06605379639087504	0.00889047	.
chr5	15932775	15938292	UMR_56292|196|196|284|8322|0.034126411920211486	0.00757576	.
chr5	16962834	16968378	UMR_56314|11|34|71|386|0.18393782383419688	0.105263	.
chr5	23430301	23438176	UMR_56438|242|242|91|10286|0.008846976472875754	0	.
chr5	24422837	24429000	UMR_56478|229|229|553|10178|0.054332874828060526	0.0136281	.
chr5	24523898	24530502	UMR_56492|271|271|718|12573|0.05710649805137994	0.0104167	.
chr5	24595813	24607020	UMR_56499|327|327|917|14897|0.06155601799019937	0.0107527	.
chr5	28116475	28126226	UMR_56585|185|185|396|9069|0.04366523321204102	0.0119048	.
chr5	28156931	28180648	UMR_56586|642|642|694|32174|0.021570211972400076	0.0112192	.
chr5	28457260	28468118	UMR_56593|483|483|412|24684|0.016690973910225247	0.00694444	.
chr5	29466875	29490502	UMR_56609|593|594|1182|31574|0.03743586495217584	0.0138889	.
chr5	32132199	32137748	UMR_56707|342|342|356|14362|0.02478763403425707	0.00525227	.
chr5	32610215	32615564	UMR_56724|162|162|209|7870|0.026556543837357054	0.00520833	.
chr5	33429183	33436749	UMR_56748|443|443|322|24128|0.013345490716180372	0.00680272	.
chr5	35375613	35403400	UMR_56830|734|736|1288|37199|0.0346245866824377	0.0105668	.
chr5	37240389	37247716	UMR_56947|311|311|846|15503|0.054570083209701345	0.00952381	.
chr5	37816713	37833246	UMR_56974|573|574|780|29514|0.02642813579995934	0.0133333	.
chr5	37893041	37898480	UMR_56979|99|99|586|4762|0.12305753884922302	0.0200119	.
chr5	41744093	41749290	UMR_57046|63|63|306|2748|0.11135371179039301	0.047143	.
chr5	41750409	41768984	UMR_57047|521|521|807|26762|0.030154696958373813	0.0132026	.
chr5	43231370	43236928	UMR_57064|374|374|368|16287|0.02259470743537791	0.00238095	.
chr5	47982036	47987456	UMR_57169|221|221|216|11304|0.01910828025477707	0.00757576	.
chr5	52111793	52117152	UMR_57227|314|314|279|14042|0.01986896453496653	0.00701832	.
chr5	57713526	57724332	UMR_57335|443|445|827|22018|0.03756017803615224	0.00694444	.
chr5	64030358	64038488	UMR_57376|14|204|67|382|0.17539267015706805	0.0726846	.
chr5	64801969	64809012	UMR_57415|269|269|296|10603|0.027916627369612375	0.00653595	.
chr5	67091501	67103608	UMR_57549|334|334|502|15944|0.03148519819367787	0.00877193	.
chr5	67214696	67224594	UMR_57556|198|198|819|9378|0.0873320537428023	0.0248047	.
chr5	67226313	67234698	UMR_57557|235|235|567|10423|0.05439892545332438	0.0167084	.
chr5	73646997	73653514	UMR_57700|183|183|192|8675|0.02213256484149856	0.00680272	.
chr5	75066727	75086808	UMR_57774|420|421|470|19984|0.023518815052041633	0.0119048	.
chr5	75147816	75157734	UMR_57778|368|369|199|16534|0.012035805007862586	0.00775194	.
chr5	84411850	84418825	UMR_57973|164|164|376|7354|0.05112863747620343	0.00724638	.
chr5	98165571	98174092	UMR_58268|220|220|334|11621|0.02874107219688495	0.0107527	.
chr5	98178851	98190882	UMR_58269|403|403|341|19296|0.01767205638474295	0.00813008	.
chr5	99973975	99980070	UMR_58370|250|250|170|9624|0.017664172901080633	0.00660131	.
chr5	100035887	100041190	UMR_58372|276|276|334|13562|0.02462763604188173	0.00653595	.
chr5	101654085	101669864	UMR_58456|561|561|473|25301|0.018694913244535788	0.00740741	.
chr5	106445877	106473308	UMR_58668|855|855|1015|42324|0.02398166524903128	0.010929	.
chr5	107717119	107729276	UMR_58729|416|416|916|22461|0.04078179956368817	0.0107501	.
chr5	108364753	108371111	UMR_58742|293|293|358|14754|0.024264606208485834	0.00564972	.
chr5	111414017	111435892	UMR_58876|736|736|3121|36405|0.0857299821453097	0.0149254	.
chr5	114566965	114573435	UMR_59244|253|254|326|12090|0.02696443341604632	0.0070922	.
chr5	115427393	115440124	UMR_59331|389|389|726|14233|0.051008220333028875	0.00980392	.
chr5	116588441	116593666	UMR_59437|163|163|441|7361|0.059910338269256895	0.00775194	.
chr5	118168805	118175210	UMR_59562|273|274|154|11166|0.013791868171234104	0.00724638	.
chr5	119656057	119691692	UMR_59693|885|885|1130|40666|0.027787340776078296	0.0109841	.
chr5	119791775	119809005	UMR_59703|368|368|725|18193|0.03985049194745232	0.0142104	.
chr5	119827772	119845922	UMR_59705|415|415|579|19588|0.02955891362058403	0.0114943	.
chr5	120424003	120441096	UMR_59760|663|663|1315|30362|0.04331071734404848	0.010582	.
chr5	123131487	123145284	UMR_59964|523|523|744|20829|0.0357194296413654	0.0047619	.
chr5	124350677	124356221	UMR_60056|276|293|104|9602|0.010831076858987711	0	.
chr5	125175101	125180685	UMR_60108|265|265|330|10352|0.03187789799072643	0.00775194	.
chr5	128439715	128445363	UMR_60281|94|95|440|4120|0.10679611650485436	0.0688325	.
chr5	128596135	128604142	UMR_60296|297|297|313|13936|0.022459816303099886	0.00952381	.
chr5	131533685	131539302	UMR_60464|224|224|297|9396|0.031609195402298854	0.00775194	.
chr5	131793622	131799147	UMR_60490|50|50|390|2341|0.16659547202050407	0.0435786	.
chr5	132540031	132545872	UMR_60564|264|264|145|8091|0.017921146953405017	0	.
chr5	135246391	135251928	UMR_60704|208|208|746|11317|0.06591852964566582	0.0107143	.
chr5	137027227	137033536	UMR_60817|325|325|357|14560|0.02451923076923077	0.00694444	.
chr5	137347831	137353378	UMR_60842|163|163|272|6842|0.03975445776088863	0.00900901	.
chr5	138992581	138999734	UMR_60911|456|456|523|21950|0.023826879271070616	0.010101	.
chr5	139535109	139559934	UMR_60955|930|936|627|38946|0.016099214296718532	0.00854701	.
chr5	139906437	139914400	UMR_60992|372|373|543|17178|0.031610199091861683	0.00694444	.
chr5	140579057	140584952	UMR_61038|60|60|600|2713|0.22115739034279394	0.143485	.
chr5	140605330	140612616	UMR_61039|279|279|558|14073|0.03965039437220209	0.0119123	.
chr5	142810013	142825384	UMR_61178|643|643|471|27162|0.01734040203225094	0.00653595	.
chr5	142959699	142964960	UMR_61196|243|243|309|12861|0.024026125495684628	0.00617284	.
chr5	147185173	147194677	UMR_61381|374|374|274|17720|0.0154627539503386	0.00724638	.
chr5	147265835	147279524	UMR_61386|291|291|374|13840|0.027023121387283237	0.0132026	.
chr5	147297579	147318394	UMR_61390|570|570|885|28571|0.030975464631969478	0.0111111	.
chr5	147721317	147727990	UMR_61411|255|255|483|12789|0.03776683087027915	0.0133333	.
chr5	147747985	147753607	UMR_61412|139|139|605|6531|0.09263512478946563	0.0336665	.
chr5	149523694	149528990	UMR_61545|98|99|420|4712|0.08913412563667232	0.0181818	.
chr6	5379103	5385700	UMR_61685|122|122|520|6408|0.08114856429463171	0.0166713	.
chr6	6846510	6883020	UMR_61751|827|829|1627|38479|0.04228280360716235	0.0179924	.
chr6	8508795	8514307	UMR_61781|232|232|209|10658|0.019609682867329704	0.00666667	.
chr6	8947797	8953210	UMR_61795|211|211|172|10205|0.016854483096521312	0.00680272	.
chr6	14897681	14903063	UMR_61853|214|214|393|9178|0.042819786445848766	0.00757576	.
chr6	15182511	15189416	UMR_61856|75|75|193|2900|0.06655172413793103	0.0208333	.
chr6	23242558	23256977	UMR_62006|418|418|905|19998|0.045254525452545255	0.0134175	.
chr6	28131743	28137086	UMR_62054|184|184|244|8243|0.029600873468397428	0.00694444	.
chr6	29430937	29437240	UMR_62126|168|168|722|7405|0.0975016880486158	0.0315283	.
chr6	30171265	30180874	UMR_62159|380|380|701|19135|0.03663443950875359	0.0122334	.
chr6	30300092	30305438	UMR_62163|142|145|124|4494|0.027592345349354695	0	.
chr6	30546587	30553572	UMR_62175|124|127|713|4541|0.1570138735961242	0.069664	.
chr6	30957259	30962622	UMR_62198|192|192|279|9166|0.03043857735108008	0.00813492	.
chr6	32583313	32589178	UMR_62287|202|202|181|8093|0.02236500679599654	0.00680272	.
chr6	40427777	40433005	UMR_62583|50|50|395|2231|0.17705064993276556	0.0691921	.
chr6	40434481	40439652	UMR_62584|147|147|424|6496|0.06527093596059114	0.00757576	.
chr6	47711013	47742157	UMR_62648|24|182|21|292|0.07191780821917808	0.0376984	.
chr6	47754053	47759505	UMR_62650|22|201|11|175|0.06285714285714286	0.0416667	.
chr6	49209196	49222360	UMR_62700|403|404|623|16693|0.0373210327682262	0.00666667	.
chr6	51169847	51185893	UMR_62792|364|365|867|15370|0.056408588158750814	0.025641	.
chr6	51466850	51472688	UMR_62808|292|292|228|12809|0.017799984385978608	0.00570175	.
chr6	52150037	52277886	UMR_62862|3507|3523|4666|164207|0.028415353791251288	0.0132026	.
chr6	52309391	52324149	UMR_62865|416|417|425|21489|0.019777560612406347	0.00813008	.
chr6	53286364	53295170	UMR_62910|209|211|292|10555|0.027664613927048793	0.00724638	.
chr6	54551131	54556202	UMR_63007|44|47|239|2192|0.10903284671532847	0.046913	.
chr6	55675852	55683870	UMR_63074|118|123|391|5099|0.07668170229456757	0.0298533	.
chr6	63255230	63260448	UMR_63157|200|200|303|9079|0.03337371957264016	0.00877193	.
chr6	64727099	64735554	UMR_63170|267|267|281|12678|0.0221643792396277	0.0070922	.
chr6	77241455	77246548	UMR_63374|169|169|285|9197|0.030988365771447212	0.00877193	.
chr6	83065932	83073964	UMR_63456|308|309|681|16036|0.04246694936393115	0.00813008	.
chr6	83082751	83089183	UMR_63458|151|153|622|7255|0.08573397656788422	0.0252776	.
chr6	83439353	83445275	UMR_63493|127|128|619|5989|0.10335615294706962	0.01736	.
chr6	83691815	83723025	UMR_63502|567|570|1249|26201|0.04766993626197474	0.0196078	.
chr6	83757743	83763689	UMR_63507|135|135|879|7463|0.11778105319576578	0.0283244	.
chr6	84582847	84590732	UMR_63543|417|417|233|18043|0.012913595300116388	0.00666667	.
chr6	85185463	85196238	UMR_63555|372|372|370|18953|0.0195219754128634	0.00833333	.
chr6	88188041	88206806	UMR_63692|702|702|1038|36367|0.028542359831715568	0.0128968	.
chr6	94694577	94701880	UMR_63976|231|231|724|12671|0.057138347407465866	0.00845101	.
chr6	99200369	99207076	UMR_64146|86|86|315|3892|0.08093525179856115	0.0184347	.
chr6	99516357	99524354	UMR_64172|314|314|412|12170|0.033853738701725554	0.00666667	.
chr6	103507539	103515116	UMR_64341|119|119|368|5750|0.064	0.00793651	.
chr6	107528981	107535658	UMR_64380|128|128|151|6143|0.024580823701774376	0.00732689	.
chr6	108658289	108663811	UMR_64416|209|215|265|7015|0.037776193870277974	0.0070922	.
chr6	113075408	113080622	UMR_64480|220|220|330|8649|0.03815469996531391	0.00666667	.
chr6	114569933	114577640	UMR_64556|11|219|24|128|0.1875	0.142157	.
chr6	114913238	114918816	UMR_64579|89|89|824|4025|0.20472049689440994	0.136996	.
chr6	119477803	119483429	UMR_64767|293|294|250|15482|0.016147784523963312	0.00546448	.
chr6	122337478	122342657	UMR_64863|174|174|294|5578|0.052707063463607026	0.00980392	.
chr6	124914941	124920663	UMR_64936|238|238|308|8716|0.03533731069297843	0.00757576	.
chr6	126161001	126168336	UMR_64994|206|209|383|9490|0.04035827186512118	0.0116995	.
chr6	127147279	127156386	UMR_65049|340|340|194|13289|0.014598540145985401	0.00775194	.
chr6	127765939	127771144	UMR_65089|235|237|272|10736|0.02533532041728763	0.00512821	.
chr6	134919343	134930272	UMR_65218|359|367|414|16801|0.024641390393428962	0.00641026	.
chr6	138418477	138428128	UMR_65375|141|142|268|5775|0.04640692640692641	0.00833333	.
chr6	144202381	144211708	UMR_65584|159|159|1040|7018|0.1481903676261043	0.050198	.
chr6	148942569	148947698	UMR_65781|272|272|212|13343|0.01588848085138275	0.00564972	.
chr7	3703307	3708742	UMR_65831|116|116|524|6414|0.08169628936700966	0.00952381	.
chr7	4119090	4125890	UMR_65833|137|137|425|5767|0.07369516212935669	0.0151515	.
chr7	16308801	16314686	UMR_65997|313|313|244|11462|0.021287733379863897	0.00724638	.
chr7	16398633	16405851	UMR_66000|251|260|487|9328|0.052208404802744426	0.00952381	.
chr7	17057953	17063225	UMR_66056|100|100|428|4586|0.09332751853467074	0.027212	.
chr7	18920914	18927616	UMR_66071|175|181|636|6080|0.10460526315789474	0.018018	.
chr7	19091627	19096799	UMR_66092|288|288|671|13846|0.04846164957388415	0.00995025	.
chr7	19307643	19313472	UMR_66117|199|199|483|9010|0.05360710321864595	0.00813008	.
chr7	24930417	24935690	UMR_66247|112|112|233|4476|0.05205540661304736	0.0190476	.
chr7	24941969	24955918	UMR_66249|418|418|1263|15359|0.08223191614037373	0.0210115	.
chr7	25246208	25252293	UMR_66277|241|261|174|8718|0.01995870612525809	0.00584795	.
chr7	25277695	25284611	UMR_66280|306|309|271|10729|0.025258644794482244	0.00219298	.
chr7	27328801	27335262	UMR_66343|305|305|1156|13981|0.08268364208568772	0.0181062	.
chr7	29167503	29173086	UMR_66479|252|254|1331|11174|0.11911580454626812	0.0252525	.
chr7	29303382	29310031	UMR_66493|271|271|401|12677|0.03163208961110673	0.00757576	.
chr7	30452799	30460728	UMR_66569|196|196|1257|10274|0.1223476737395367	0.0566652	.
chr7	31049272	31056206	UMR_66605|172|181|581|7733|0.07513254881675935	0.0140852	.
chr7	34650835	34656631	UMR_66640|319|322|316|12540|0.025199362041467305	0.00564972	.
chr7	36690271	36701681	UMR_66769|433|452|811|18001|0.04505305260818843	0.00980392	.
chr7	36706659	36711836	UMR_66770|86|86|374|2850|0.1312280701754386	0.0944671	.
chr7	37767489	37774622	UMR_66836|339|340|261|13456|0.01939655172413793	0.00537634	.
chr7	40897736	40902989	UMR_66886|252|252|753|12882|0.05845365626455519	0.0107182	.
chr7	44350471	44361436	UMR_66934|422|422|1060|18671|0.05677253494724439	0.0185185	.
chr7	44586445	44594782	UMR_66956|333|333|487|15985|0.030466061933062245	0.00680272	.
chr7	44601465	44607092	UMR_66957|150|150|510|6091|0.08373009358069282	0.0389513	.
chr7	45163483	45169164	UMR_67013|146|146|748|6526|0.11461844927980386	0.0222797	.
chr7	45174469	45182988	UMR_67014|269|269|1013|12827|0.07897403913619709	0.0274504	.
chr7	49631423	49641974	UMR_67277|324|324|320|15529|0.02060660699336725	0.00732689	.
chr7	49906747	49917524	UMR_67301|292|292|482|14954|0.03223217868128929	0.0121615	.
chr7	51621078	51634368	UMR_67320|198|198|368|9644|0.03815844048112816	0.0122697	.
chr7	63753178	63760004	UMR_67428|315|315|658|17687|0.037202465087352296	0.0070922	.
chr7	67949688	67955630	UMR_67630|392|392|214|15136|0.0141384778012685	0.0064731	.
chr7	69990701	69995972	UMR_67722|54|54|352|2395|0.14697286012526095	0.0280927	.
chr7	70278711	70290718	UMR_67739|217|217|421|11067|0.03804102286075721	0.00900901	.
chr7	70323451	70372460	UMR_67740|1251|1251|1439|52065|0.02763852876212427	0.012619	.
chr7	73374231	73380312	UMR_67828|195|195|343|9575|0.03582245430809399	0.00641026	.
chr7	73389063	73394840	UMR_67830|162|162|137|6766|0.020248300325155188	0.00775194	.
chr7	73536867	73542410	UMR_67838|98|98|116|4025|0.028819875776397514	0.0026455	.
chr7	73551497	73559742	UMR_67840|196|196|157|7849|0.020002548095298764	0.0060104	.
chr7	73612805	73619647	UMR_67848|189|189|479|8851|0.05411817873686589	0.0070922	.
chr7	75845843	75851411	UMR_67921|132|137|431|5992|0.07192923898531375	0.00813008	.
chr7	79495550	79553188	UMR_68022|1188|1190|2668|56341|0.04735450205001686	0.00716929	.
chr7	79589364	79595300	UMR_68028|98|98|417|4255|0.09800235017626321	0.0124102	.
chr7	81210131	81215541	UMR_68138|279|279|539|15643|0.03445630633510196	0.011939	.
chr7	82863361	82871942	UMR_68205|413|413|339|19921|0.01701721801114402	0.00680272	.
chr7	96209039	96215290	UMR_68409|262|263|265|12484|0.021227170778596604	0.00680272	.
chr7	98832001	98841309	UMR_68557|320|320|1054|18570|0.05675821217016694	0.00925926	.
chr7	101833991	101839109	UMR_68737|179|179|368|8567|0.042955527022294854	0.00653595	.
chr7	110625858	110631004	UMR_68874|180|180|433|10132|0.04273588630082906	0.0151515	.
chr7	116026905	116035772	UMR_69087|232|232|269|10755|0.02501162250116225	0.00694444	.
chr7	118990207	118996797	UMR_69233|180|180|509|8801|0.05783433700715828	0.00833333	.
chr7	126271351	126276576	UMR_69492|185|185|319|9021|0.03536193326682186	0.00490196	.
chr7	129650661	129656799	UMR_69662|98|98|836|5019|0.1665670452281331	0.0727399	.
chr7	130260001	130267534	UMR_69703|266|266|883|14267|0.06189107731127778	0.0101699	.
chr7	131539775	131561311	UMR_69759|784|786|825|38346|0.021514629948364887	0.00813008	.
chr7	132596493	132604654	UMR_69830|225|225|716|10544|0.06790591805766312	0.0160853	.
chr7	132807626	132814752	UMR_69847|229|229|365|10550|0.03459715639810427	0.00680272	.
chr7	133069703	133075113	UMR_69858|69|69|596|3445|0.17300435413642962	0.0572917	.
chr7	133114993	133125646	UMR_69862|445|446|1427|17843|0.07997534046965196	0.00740741	.
chr7	137306271	137323761	UMR_70092|881|881|778|43798|0.017763368190328324	0.00694444	.
chr7	139580111	139588520	UMR_70182|375|375|831|22645|0.03669684257010378	0.010101	.
chr7	140056652	140063797	UMR_70214|159|159|768|8304|0.09248554913294797	0.0151515	.
chr7	142091427	142099092	UMR_70304|208|208|484|11101|0.04359967570489145	0.00666667	.
chr7	142657094	142666086	UMR_70334|353|354|436|14932|0.02919903562818109	0.00793651	.
chr7	144893933	144899022	UMR_70434|162|162|388|8785|0.04416619237336369	0.00709541	.
chr7	144937439	144943890	UMR_70438|341|342|181|18291|0.009895577059756164	0.00628931	.
chr8	6603683	6612232	UMR_70508|49|49|306|1958|0.15628192032686414	0.116671	.
chr8	8484412	8490608	UMR_70545|97|97|673|5013|0.13425094753640535	0.0685523	.
chr8	8646665	8663228	UMR_70557|428|428|1085|22656|0.04789018361581921	0.0070922	.
chr8	11475051	11480250	UMR_70689|167|167|434|8963|0.04842128751534085	0.0148522	.
chr8	11554128	11559130	UMR_70694|370|370|140|16877|0.00829531314807134	0.00520833	.
chr8	12323154	12328714	UMR_70744|100|100|759|5136|0.1477803738317757	0.103691	.
chr8	12382107	12388175	UMR_70748|248|248|554|11184|0.04953505007153076	0.014777	.
chr8	12393698	12403756	UMR_70750|487|487|451|21626|0.020854526958290945	0.00584795	.
chr8	12477625	12482659	UMR_70760|86|86|753|4246|0.17734338200659444	0.0386055	.
chr8	23409561	23416142	UMR_71028|225|225|346|11374|0.03042025672586601	0.00980392	.
chr8	25196529	25202496	UMR_71092|224|224|487|10273|0.04740582108439599	0.00742207	.
chr8	26975796	26982341	UMR_71203|349|349|469|16186|0.028975657976028666	0.0112994	.
chr8	34804159	34810780	UMR_71440|369|369|293|18054|0.016229090506259	0.00606061	.
chr8	44933907	44940113	UMR_71689|280|280|230|14338|0.016041288882689356	0.00653595	.
chr8	46288499	46297970	UMR_71757|265|265|730|12376|0.05898513251454428	0.0159795	.
chr8	47238923	47244521	UMR_71796|101|101|402|4717|0.08522365910536357	0.0197617	.
chr8	47283225	47290212	UMR_71803|298|298|195|15269|0.0127709738686227	0.00617284	.
chr8	47350680	47356484	UMR_71812|83|83|651|3923|0.16594443028294673	0.133481	.
chr8	48308951	48314275	UMR_71875|76|76|622|3654|0.17022441160372195	0.144837	.
chr8	48550913	48556662	UMR_71901|187|187|162|8183|0.01979714041305145	0.00724638	.
chr8	48841834	48847266	UMR_71931|179|179|502|6625|0.07577358490566037	0.0104167	.
chr8	54953084	54960950	UMR_72014|57|57|276|2275|0.12131868131868132	0.0991521	.
chr8	57310884	57354467	UMR_72031|959|959|1165|44061|0.02644061641814757	0.01102	.
chr8	60627534	60634452	UMR_72081|176|176|685|9822|0.069741396864182445	0.00900901	.
chr8	69880827	69889836	UMR_72268|566|566|3570|33660|0.10606060606060606	0.0579268	.
chr8	70486375	70496349	UMR_72306|452|453|506|18251|0.0277245082461235	0.0147009	.
chr8	71568253	71573325	UMR_72392|135|135|439|7334|0.059858194709571856	0.00628931	.
chr8	71679023	71694401	UMR_72407|563|563|1813|31140|0.058220937700706486	0.0326583	.
chr8	76898073	76903521	UMR_72467|261|261|196|10996|0.017824663514005093	0.00606061	.
chr8	78419231	78441892	UMR_72528|460|460|1410|19939|0.07071568283263956	0.0113481	.
chr8	83897119	83903878	UMR_72672|321|322|406|11210|0.03621766280107047	0.00617284	.
chr8	84659677	84665940	UMR_72731|286|286|261|14716|0.01773579777113346	0.00634978	.
chr8	84703699	84709636	UMR_72734|261|262|779|10410|0.07483189241114313	0.0478564	.
chr8	84710711	84717020	UMR_72735|101|101|676|4991|0.13544379883790825	0.0976809	.
chr8	84737455	84747228	UMR_72740|165|165|603|7569|0.07966706302021404	0.0289683	.
chr8	84762993	84791178	UMR_72745|571|571|2666|25980|0.10261739799846036	0.0445906	.
chr8	84975434	84981446	UMR_72768|303|303|521|14177|0.036749664950271564	0.00900901	.
chr8	87466997	87474511	UMR_72842|377|377|404|18655|0.021656392388099705	0.00757576	.
chr8	87830025	87838433	UMR_72874|145|145|804|6637|0.12113906885641103	0.0689664	.
chr8	87953325	87963188	UMR_72887|437|437|717|18353|0.03906718247697924	0.00854701	.
chr8	89034505	89047762	UMR_72950|497|497|342|21889|0.015624286171136188	0.00666667	.
chr8	89567922	89573268	UMR_72976|81|81|553|3512|0.15746013667425968	0.141857	.
chr8	90344651	90350516	UMR_73013|226|226|359|8286|0.043326092203717116	0.0104268	.
chr8	91797411	91807833	UMR_73107|516|516|817|25691|0.03180101981238566	0.00949027	.
chr8	92353387	92367551	UMR_73154|683|683|728|33276|0.02187762952277918	0.00833333	.
chr8	93809413	93815464	UMR_73212|296|296|506|10876|0.04652445752114748	0.00628931	.
chr8	94992421	94998272	UMR_73282|80|80|474|4435|0.1068771138669673	0.0452385	.
chr8	102780463	102787484	UMR_73419|217|217|511|9892|0.0516579053780833	0.0107527	.
chr8	105263330	105272937	UMR_73507|336|336|1046|17024|0.061442669172932333	0.0157324	.
chr8	108694613	108705902	UMR_73722|386|386|373|13079|0.028518999923541555	0.00925926	.
chr8	109247577	109252946	UMR_73771|109|109|272|4625|0.05881081081081081	0.015873	.
chr8	120173809	120179720	UMR_74361|110|110|937|5405|0.17335800185013875	0.0589717	.
chr8	120224780	120230886	UMR_74366|303|304|868|14998|0.05787438325110015	0.00694444	.
chr8	120484391	120491610	UMR_74422|307|309|444|14007|0.031698436496037694	0.00793651	.
chr8	120508861	120514856	UMR_74427|117|118|453|5178|0.08748551564310544	0.0350877	.
chr8	120531625	120540557	UMR_74433|405|406|852|16811|0.05068110165962762	0.00606061	.
chr8	121070181	121093276	UMR_74487|762|771|1240|37652|0.03293317752045044	0.0106048	.
chr8	121112811	121130306	UMR_74489|692|692|801|35678|0.02245081002298335	0.00987709	.
chr8	123409863	123415112	UMR_74680|122|122|281|6176|0.04549870466321244	0.015873	.
chr8	123607505	123624266	UMR_74688|82|923|108|778|0.13881748071979436	0	.
chr8	126588526	126596798	UMR_74904|437|437|241|21208|0.011363636363636364	0.00606061	.
chr8	126659521	126669054	UMR_74908|146|146|857|6946|0.12338036279873309	0.0606225	.
chr8	128356621	128363784	UMR_74985|213|214|234|10379|0.022545524617015127	0.00617284	.
chr9	7999527	8005628	UMR_75024|231|231|395|9264|0.04263816925734024	0.00555556	.
chr9	10525173	10530386	UMR_75044|30|31|255|1275|0.2	0.0956117	.
chr9	21029235	21038972	UMR_75216|416|416|950|22897|0.041490151548237764	0.0157969	.
chr9	24767896	24783080	UMR_75366|359|359|629|17994|0.03495609647660331	0.0130051	.
chr9	31911355	31917624	UMR_75618|229|229|294|11861|0.024787117443723125	0.00793651	.
chr9	32539505	32551480	UMR_75644|308|308|533|16169|0.03296431442884532	0.0113468	.
chr9	34485371	34490668	UMR_75687|150|150|309|8028|0.03849028400597907	0.00833333	.
chr9	35399611	35406178	UMR_75744|91|92|572|4376|0.13071297989031078	0.0343259	.
chr9	35420591	35436151	UMR_75747|259|264|546|10287|0.05307669874599009	0.0114169	.
chr9	37430427	37435989	UMR_75804|135|135|474|6944|0.06826036866359447	0.0112994	.
chr9	37450885	37463156	UMR_75805|214|218|805|10310|0.07807953443258972	0.0180852	.
chr9	37526781	37532883	UMR_75807|149|149|1066|8032|0.1327191235059761	0.112886	.
chr9	40871073	40880056	UMR_75885|295|303|304|14374|0.02114929734242382	0.0106673	.
chr9	41374319	41379734	UMR_75922|77|84|202|3659|0.05520634053019951	0.0202206	.
chr9	41575381	41590834	UMR_75933|175|183|332|6625|0.05011320754716981	0.00775194	.
chr9	41934674	41940634	UMR_75956|84|86|384|3379|0.11364308967150044	0.0376061	.
chr9	44083397	44088597	UMR_76118|171|171|803|9758|0.0822914531666325	0.016855	.
chr9	44482051	44491120	UMR_76149|211|219|494|9133|0.05408956531260265	0.0155123	.
chr9	44878280	44883838	UMR_76175|251|256|152|8548|0.017781937295273748	0.00529101	.
chr9	45133685	45139738	UMR_76184|128|133|458|6233|0.07347986523343494	0.0124962	.
chr9	45429166	45434661	UMR_76197|174|175|399|8738|0.04566262302586404	0.0128205	.
chr9	46011513	46016592	UMR_76238|169|173|360|6339|0.05679129200189304	0.0104167	.
chr9	47529149	47534282	UMR_76345|283|284|158|12844|0.012301463718467767	0.0070922	.
chr9	55538169	55550314	UMR_76689|454|454|805|24481|0.032882643682856094	0.0125876	.
chr9	56633255	56638547	UMR_76730|217|217|537|10439|0.05144170897595555	0.00813008	.
chr9	57070759	57077884	UMR_76760|355|355|194|15810|0.012270714737507906	0.00574713	.
chr9	57937464	57942892	UMR_76813|172|173|420|7977|0.05265137269650245	0.00653595	.
chr9	58194973	58205026	UMR_76837|375|375|418|19283|0.02167712492869367	0.0111142	.
chr9	61367421	61381770	UMR_77020|464|466|815|20397|0.039956856400451046	0.00694444	.
chr9	62339600	62346600	UMR_77104|353|362|230|13934|0.016506387254198365	0.00606061	.
chr9	63131550	63153186	UMR_77151|896|896|951|47461|0.02003750447736036	0.00980392	.
chr9	63754758	63759784	UMR_77196|219|221|245|11658|0.02101561159718648	0.00813008	.
chr9	64015163	64023670	UMR_77224|381|381|487|17916|0.02718240678722929	0.00775194	.
chr9	65823376	65828935	UMR_77326|149|149|323|6047|0.05341491648751447	0.00757576	.
chr9	67041300	67050573	UMR_77385|276|276|717|13679|0.05241611228891001	0.00666667	.
chr9	69666741	69672056	UMR_77496|102|102|290|4299|0.06745754826703884	0.00932401	.
chr9	69754001	69773078	UMR_77504|529|529|423|25158|0.01681373718101598	0.0070922	.
chr9	74846541	74869104	UMR_77663|705|705|791|34394|0.022998197360004653	0.0113027	.
chr9	78476639	78483012	UMR_77780|176|178|155|7941|0.019518952273013476	0.0047619	.
chr9	79716295	79721566	UMR_77804|184|184|606|9480|0.06392405063291139	0.012283	.
chr9	82972321	82977498	UMR_77846|271|271|143|7940|0.01801007556675063	0	.
chr9	87726499	87741424	UMR_77950|475|475|587|22663|0.025901248731412436	0.0123457	.
chr9	89867165	89872925	UMR_77993|55|55|482|2218|0.21731289449954913	0.13556	.
chr9	89906675	89911780	UMR_78002|201|201|186|8359|0.022251465486302188	0.00606061	.
chr9	91359193	91369538	UMR_78028|379|380|1159|15186|0.07632029500856051	0.0107527	.
chr9	91376883	91388624	UMR_78031|363|363|1366|17639|0.07744203186121662	0.0280893	.
chr9	91392126	91397846	UMR_78032|76|76|353|3309|0.1066787549108492	0.0989057	.
chr9	91399435	91411034	UMR_78033|151|152|865|6603|0.13100106012418597	0.0711367	.
chr9	94534471	94540074	UMR_78077|283|283|233|13261|0.017570318980469044	0.00529101	.
chr9	98951301	98966398	UMR_78267|534|534|666|27541|0.024182128463018773	0.00925926	.
chr9	99867167	99880496	UMR_78310|461|461|562|21331|0.026346631662838123	0.0114943	.
chr9	101072367	101078408	UMR_78344|286|286|180|13043|0.013800506018554013	0.00641026	.
chr9	102714594	102720272	UMR_78431|177|177|496|9899|0.050106071320335385	0.00584795	.
chr9	106451949	106457406	UMR_78616|156|156|514|6447|0.07972700480843803	0	.
chr9	107626353	107636010	UMR_78697|231|231|1078|12122|0.08892921960072596	0.0121212	.
chr9	107696943	107702178	UMR_78706|89|89|675|4806|0.1404494382022472	0.055291	.
chr9	112226429	112237101	UMR_78907|175|175|925|7316|0.12643521049753964	0.0221496	.
chr9	114559431	114565518	UMR_78980|402|402|312|19333|0.016138209279470336	0.00653595	.
chr9	115306271	115311621	UMR_79024|249|249|213|11846|0.017980752996792165	0.00694444	.
chr9	118475271	118481557	UMR_79148|272|272|385|13608|0.028292181069958847	0.00813008	.
chr9	120930648	120936905	UMR_79303|263|263|731|11282|0.06479347633398333	0.0114943	.
chr9	121311754	121317278	UMR_79328|80|80|523|4035|0.1296158612143742	0.0591844	.
chr9	122567539	122574500	UMR_79426|284|284|320|13438|0.023813067420747135	0.00666667	.
chr9	123897910	123926590	UMR_79468|170|170|235|5681|0.04136595669776448	0.0123457	.
chr9	124419561	124426607	UMR_79472|302|302|163|15537|0.010491085795198559	0.00546448	.
chrX	9198769	9204080	UMR_79566|157|157|88|3668|0.023991275899672846	0	.
chrX	11490025	11495127	UMR_79632|102|102|242|2694|0.08982925018559762	0.010101	.
chrX	11998117	12009542	UMR_79678|407|407|441|9502|0.04641128183540307	0.0119048	.
chrX	12065523	12075039	UMR_79684|174|174|553|4301|0.12857475005812602	0.0717964	.
chrX	12076361	12082026	UMR_79685|447|449|183|10669|0.017152497891086325	0	.
chrX	12086488	12092608	UMR_79688|420|423|128|9305|0.013756045137023106	0	.
chrX	12155133	12160733	UMR_79699|272|276|330|6042|0.05461767626613704	0.0144928	.
chrX	13279609	13284663	UMR_79745|195|196|54|3998|0.013506753376688344	0	.
chrX	20793389	20799336	UMR_79807|54|56|171|1179|0.1450381679389313	0.0163477	.
chrX	37046783	37053408	UMR_79871|173|173|395|4986|0.07922182109907741	0.025641	.
chrX	42148471	42154122	UMR_79923|253|258|81|4805|0.016857440166493237	0	.
chrX	48340336	48346490	UMR_79987|361|384|157|6213|0.025269596008369546	0	.
chrX	49477217	49482630	UMR_80016|80|80|223|1858|0.12002152852529602	0.0166667	.
chrX	51677497	51683996	UMR_80053|198|198|359|5229|0.06865557467967107	0	.
chrX	52742542	52754457	UMR_80094|142|142|348|3343|0.10409811546515106	0.0277778	.
chrX	56729878	56735162	UMR_80142|138|152|116|1971|0.05885337392186707	0	.
chrX	57914959	57924138	UMR_80171|221|221|497|5411|0.09184993531694696	0.0404412	.
chrX	58026089	58034830	UMR_80179|290|290|482|7773|0.06200952013379647	0.0128205	.
chrX	60542147	60548664	UMR_80211|172|172|100|3170|0.031545741324921134	0	.
chrX	60887893	60897314	UMR_80227|437|438|202|9996|0.020208083233293317	0	.
chrX	66645455	66654496	UMR_80241|113|113|122|2696|0.045252225519287835	0.0144928	.
chrX	69359378	69364683	UMR_80255|120|120|115|2913|0.0394782011671816	0	.
chrX	71048347	71055217	UMR_80277|179|183|138|4625|0.029837837837837836	0	.
chrX	71660669	71670670	UMR_80291|226|226|468|6874|0.06808263020075647	0.0199811	.
chrX	73963859	73969596	UMR_80338|174|174|87|4538|0.019171441163508152	0.00833333	.
chrX	74243797	74250546	UMR_80345|149|155|262|3775|0.06940397350993377	0.00980392	.
chrX	77507961	77513582	UMR_80390|189|193|65|3938|0.016505840528186898	0	.
chrX	93279445	93302786	UMR_80437|613|615|222|15821|0.014031982807660704	0.00793651	.
chrX	94540275	94545466	UMR_80467|157|166|122|2960|0.04121621621621622	0.0111111	.
chrX	99134823	99154081	UMR_80516|374|374|598|10854|0.05509489589091579	0.0111235	.
chrX	99213355	99218596	UMR_80520|114|115|434|3011|0.14413816007970773	0.0151515	.
chrX	101298431	101304750	UMR_80597|116|120|327|2320|0.14094827586206896	0.0336219	.
chrX	101637645	101643665	UMR_80608|127|127|223|3017|0.07391448458733842	0	.
chrX	102249461	102254620	UMR_80633|270|270|79|7151|0.011047405957208782	0	.
chrX	104197229	104202492	UMR_80676|255|255|121|5086|0.023790798269760126	0	.
chrX	105762836	105767899	UMR_80692|204|204|124|5144|0.02410575427682737	0.0138889	.
chrX	110810067	110817836	UMR_80734|175|175|78|4354|0.017914561322921452	0	.
chrX	120288781	120294384	UMR_80756|150|151|48|3468|0.01384083044982699	0	.
chrX	133680375	133693654	UMR_80798|383|385|405|9568|0.04232859531772575	0	.
chrX	134294965	134300512	UMR_80812|65|65|149|1708|0.08723653395784543	0.0151515	.
chrX	137096253	137129804	UMR_80883|558|714|617|12174|0.05068178084442254	0.015873	.
chrX	141717524	141730186	UMR_80942|291|291|258|7780|0.033161953727506424	0.00833333	.
chrX	142679869	142687091	UMR_80959|160|181|329|2979|0.1104397448808325	0	.
chrX	143901607	143907336	UMR_80995|30|30|102|798|0.12781954887218044	0.142857	.
chrX	152143759	152148999	UMR_81052|151|151|210|3731|0.05628517823639775	0.00952381	.
chrX	153496829	153503202	UMR_81078|174|190|57|4092|0.013929618768328446	0	.
chrX	155621575	155628208	UMR_81093|219|219|107|4858|0.02202552490736929	0	.
chrX	158918653	158925808	UMR_81118|76|76|127|1762|0.0720771850170261	0.0166667	.
chrX	160991469	160996984	UMR_81163|147|147|69|3327|0.020739404869251576	0	.
chrX	166343213	166352250	UMR_81266|76|76|160|1719|0.09307737056428156	0.0175439	.
chrX	169879107	169884526	UMR_81323|95|95|87|2227|0.03906600808262236	0	.
